# Supplementary material for: RNAseq Analysis of Brown Adipose Tissue and Thyroid of Newborn Lambs Subjected to Short-Term Cold Exposure Reveals Signs of Early Whitening of Adipose Tissue
Source: MDPI journal article supplement (doi:10.3390/metabo12100996), 2022-10-20
Supplement: s1 [file s1]

**Figure S2.** Fold change results of RT-qPCR target and endogenous genes compared to its corresponding RNAseq result (log2FC ± SE ).

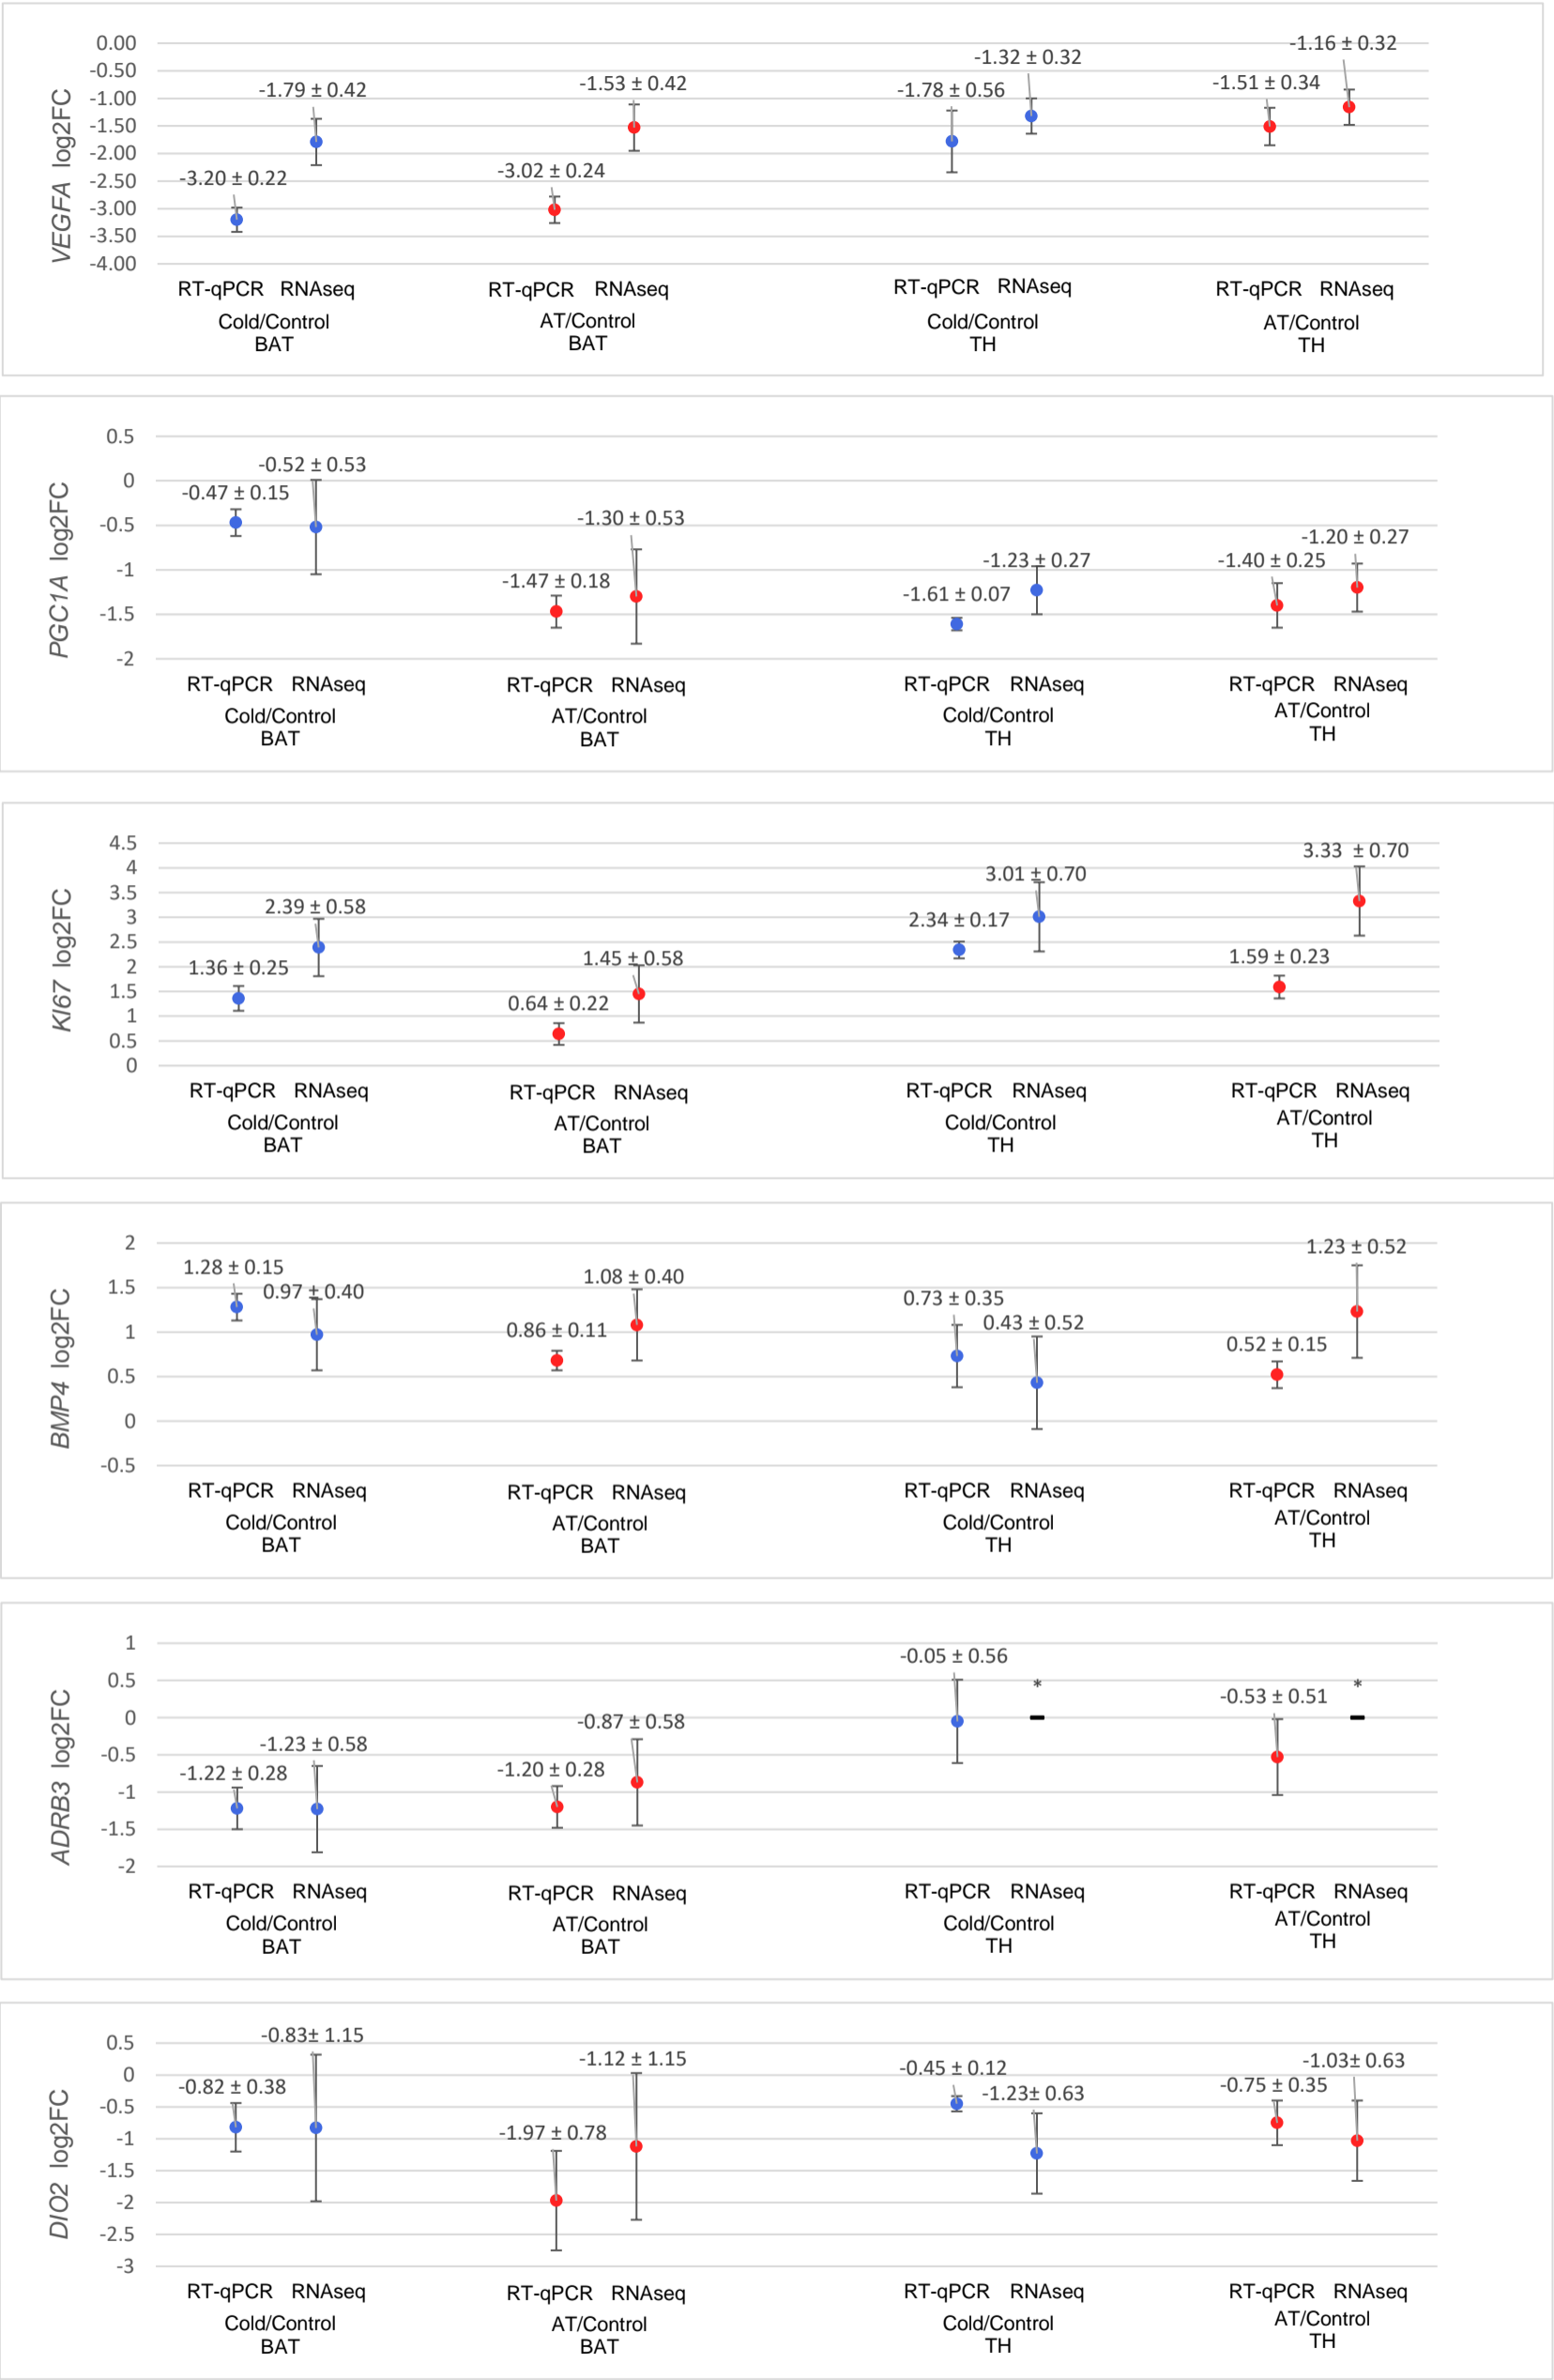

\* Not enough counts for calculation of log2FC of *ADRB3* in thyroid tissue via RNAseq
