# Supplementary material for: RNAseq Analysis of Brown Adipose Tissue and Thyroid of Newborn Lambs Subjected to Short-Term Cold Exposure Reveals Signs of Early Whitening of Adipose Tissue
Source: MDPI journal article supplement (doi:10.3390/metabo12100996), 2022-10-20

**Figure S1.** Principal component analysis (PCA) plots of normalised sequence read counts in control vs. cold vs. ambient temperature groups for brown adipose tissue (BAT) (left) and thyroid tissue (TH) (right).

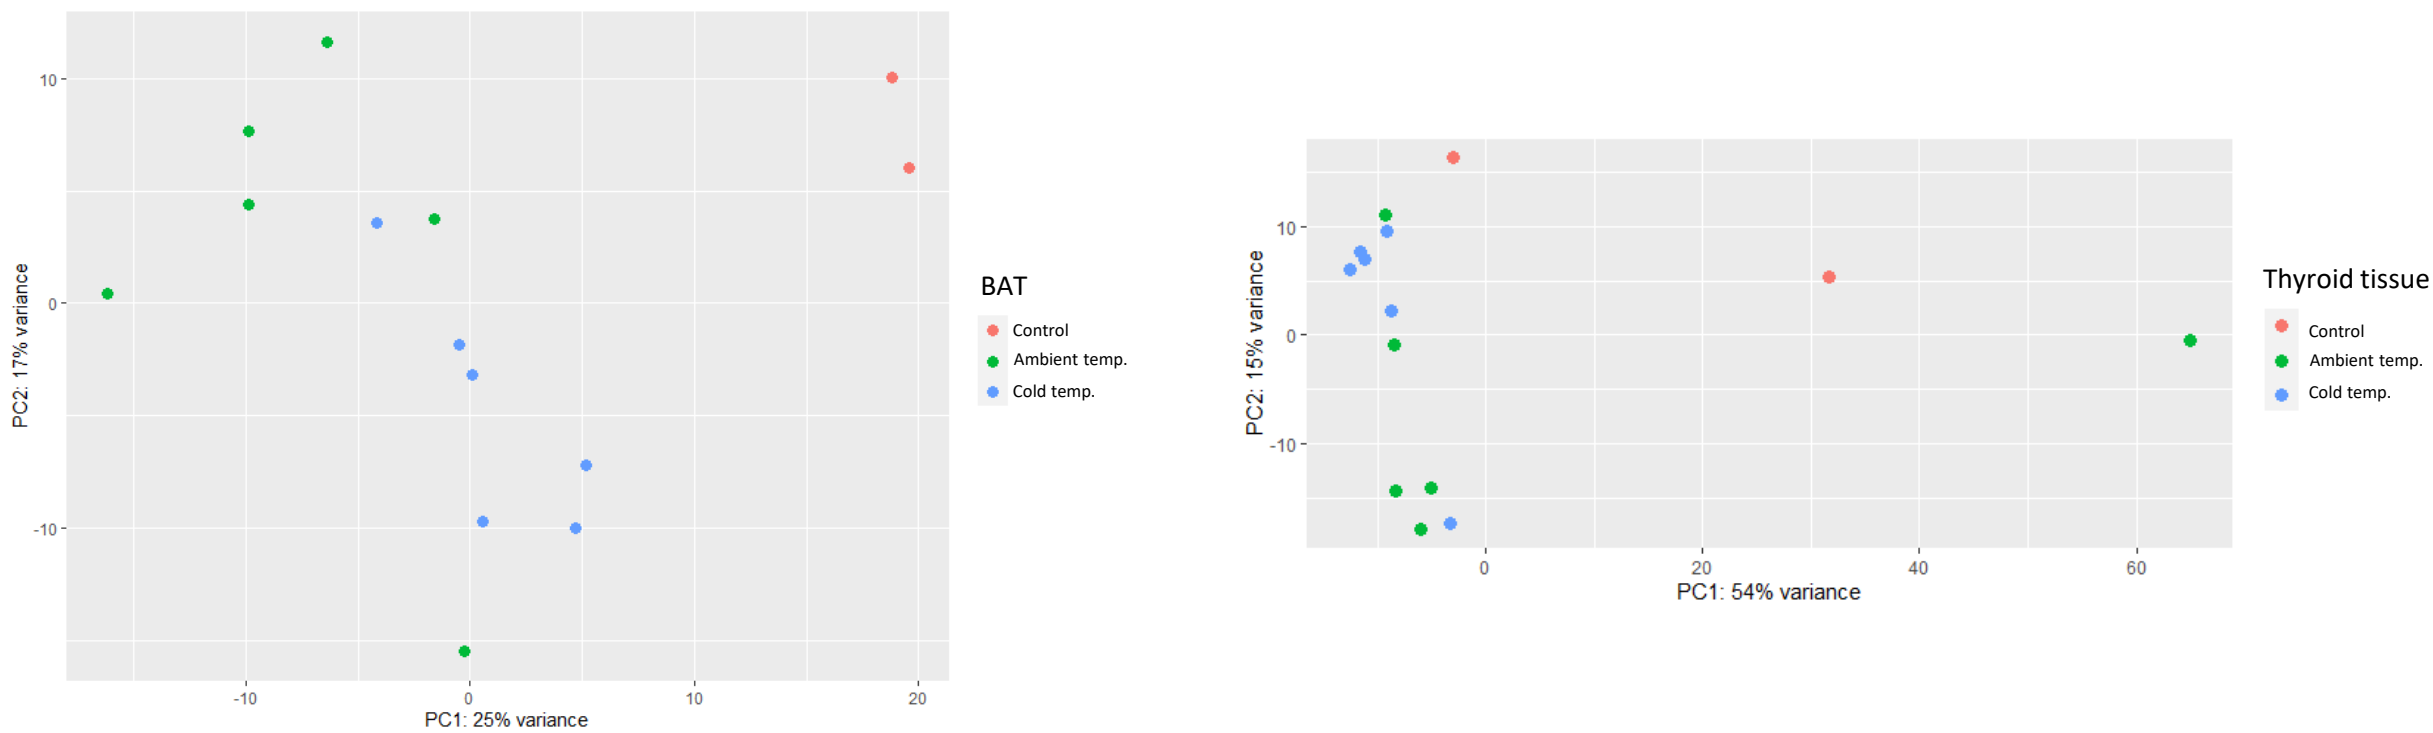

Supplement: s1 [file s1]
