# Supplementary material for: RNAseq Analysis of Brown Adipose Tissue and Thyroid of Newborn Lambs Subjected to Short-Term Cold Exposure Reveals Signs of Early Whitening of Adipose Tissue
Source: Metabolites. 2022 Oct 20;12(10):996. doi: 10.3390/metabo12100996 (PMC9607389; doi:10.3390/metabo12100996)
Supplement: Supplementary file 1 [file metabolites-12-00996-s001.zip]

Archive with 7 entries (7 files):
- Additional file 1. Table S1. Reads numbers throughout the analysis and RIN values of RNA samples.xlsx
- Additional file 2. Table S2. DEGs list per tissue-treatment.xlsx
- Additional file 4. Figure S1. PCA plots of control vs. cold vs. ambient temperature groups of BAT and thyroid tissue.pdf
- Additional file 5. Table S4. GO terms and Pathways per tissue-treatment.xlsx
- Additional file 6. Table S5. Primer sequences for RT-qPCR.xlsx
- Additional file 7. Figure S2. RT-qPCR validation figures.pdf
- Additonal file 3. Table S3. DESeq results for the 38 analysed genes.xlsx
