# Supplementary material for: RNAseq Analysis of Brown Adipose Tissue and Thyroid of Newborn Lambs Subjected to Short-Term Cold Exposure Reveals Signs of Early Whitening of Adipose Tissue
Source: Metabolites. 2022 Oct 20;12(10):996. doi: 10.3390/metabo12100996 (PMC9607389; doi:10.3390/metabo12100996)
Supplement: Supplementary file 1 [file metabolites-12-00996-s001.zip › Additional file 1. Table S1. Reads numbers throughout the analysis and RIN values of RNA samples.xlsx]

## Sheet: RNAseq metrics 
Sample ID	Tissue	Treatment	RIN	Reads from BGI	Reads mapped to the reference genome	Reads mapped to the reference genome (% of these to BGI reads)	Reads assigned to features	Reads assigned to features (% of these to BGI reads)
1	Brown adipose tissue	Cold Temp. (4°C)	7.2	73066296	62678409	85.7829	37025998	59.073
2	Thyroid		7.3	73703556	37847022	51.3503	28612442	75.6002
3	Brown adipose tissue	Cold Temp. (4°C)	6.9	74057242	53767968	72.6033	34382409	63.9459
4	Thyroid		8.7	72994756	37261684	51.0471	27779134	74.5515
5	Brown adipose tissue	Cold Temp. (4°C)	7.3	74135588	57856219	78.0411	34575971	59.7619
6	Thyroid		7.2	73555460	36284427	49.3293	27222526	75.0254
7	Brown adipose tissue	Cold Temp. (4°C)	6.4	74207392	55011548	74.1322	35464882	64.4681
8	Thyroid		7.5	73503452	37107585	50.4841	27728540	74.7247
9	Brown adipose tissue	Cold Temp. (4°C)	6.4	74281816	52448900	70.608	33246910	63.3891
10	Thyroid		8.4	74298362	37245401	50.1295	27846200	74.7641
11	Brown adipose tissue	Cold Temp. (4°C)	6.9	74622948	52364442	70.172	32844683	62.7233
12	Thyroid		8.3	72844336	36158033	49.6374	27240012	75.336
13	Brown adipose tissue	Ambient Temp. (20-22°C)	6.9	73561744	56435097	76.718	33595377	59.5292
14	Thyroid		7.3	73931808	37873413	51.2275	28665528	75.6877
15	Brown adipose tissue	Ambient Temp. (20-22°C)	6.2	74028318	57368721	77.4956	34191988	59.6004
16	Thyroid		7.8	73546918	39006708	53.0365	27689811	70.9873
17	Brown adipose tissue	Ambient Temp. (20-22°C)	6	73890946	55726034	75.4166	34348089	61.6374
18	Thyroid		7.8	73863628	38552528	52.1942	30124871	78.1398
19	Brown adipose tissue	Ambient Temp. (20-22°C)	7.8	73655688	50330594	68.3323	31556500	62.6984
20	Thyroid		7.6	73344404	37385482	50.9725	28086816	75.1276
21	Brown adipose tissue	Ambient Temp. (20-22°C)	5.8	74241580	59383107	79.9863	34404783	57.937
22	Thyroid		7.6	72870850	38264692	52.5103	27609747	72.1546
23	Brown adipose tissue	Ambient Temp. (20-22°C)	7.6	74590652	49348165	66.1586	32529101	65.9175
24	Thyroid		8.2	73279050	37064905	50.5805	27701134	74.7368
25	Brown adipose tissue	Control	7.5	74157486	58503089	78.8903	34294146	58.6194
26	Thyroid		7.9	73891274	37295112	50.473	28527034	76.49
27	Brown adipose tissue	Control	6.6	67153636	58065068	86.466	34523931	59.4573
28	Thyroid		7.1	73762774	42849269	58.0906	25062784	58.4906
29	Brown adipose tissue	Control	6	74307724	50782515	68.3408	32324089	63.652
30	Thyroid		8.3	73891614	36470965	49.3574	28400537	77.8716
