# Supplementary material for: RNAseq Analysis of Brown Adipose Tissue and Thyroid of Newborn Lambs Subjected to Short-Term Cold Exposure Reveals Signs of Early Whitening of Adipose Tissue
Source: Metabolites. 2022 Oct 20;12(10):996. doi: 10.3390/metabo12100996 (PMC9607389; doi:10.3390/metabo12100996)
Supplement: Supplementary file 1 [file metabolites-12-00996-s001.zip › Additional file 2. Table S2. DEGs list per tissue-treatment.xlsx]

## Sheet: BAT cold UP
Gene	log2FoldChange	FDR
CYP1A1	12.8026	6.6645e-09
GLYAT	10.0812	0.000105067
ASPG	7.64615	0.00314791
IDO1	6.46349	0.00742671
IFI6	5.92528	4.05973e-18
ISG15	5.87148	1.82803e-13
CXCL10	5.42097	0.00505922
PRSS35	5.14504	0.00174238
GAS2L2	5.0295	1.07659e-07
GALNT5	5.00562	0.0265602
DPEP3	4.93852	1.1488e-05
MX1	4.75838	1.14834e-11
ABCC8	4.63882	0.00989456
HERC6	4.50004	9.02193e-07
IFIT1	4.38349	1.23793e-10
FFAR4	4.17127	0.0133686
GSTA1	4.1477	0.0131771
TDRD9	4.04672	6.03583e-05
LRRC31	3.92677	0.000110171
CCN5	3.80227	0.00257768
THRSP	3.75633	5.56034e-07
WNT6	3.68873	0.00862061
FCGR3A	3.62003	0.0496544
CENPW	3.61205	0.00125165
FMOD	3.61184	0.00491337
KIF4A	3.57203	0.00125165
SLC47A2	3.50518	0.0348515
IFIT3	3.42996	0.000115045
CENPF	3.41574	1.57548e-07
XAF1	3.29841	2.84508e-07
ASPM	3.26037	0.000363355
RHBDL1	3.22714	5.84512e-07
SLC22A18	3.21305	0.00278752
SHCBP1	3.20893	0.00201865
IRF7	3.1918	9.07252e-05
C3AR1	3.16463	0.0132129
DPEP2	3.16333	0.000471241
TTK	3.14997	0.000363355
EPSTI1	3.10688	0.000107355
BUB1B	3.08727	0.000481231
MS4A7	3.07294	0.0479748
GHSR	3.0386	3.74565e-07
ECT2L	2.98287	0.0204912
COL28A1	2.979	0.0134706
CAMK2B	2.96465	0.0210716
SPC24	2.93966	0.00674004
CDK1	2.9317	0.0187219
CENPE	2.90279	4.96574e-05
GABBR2	2.87614	0.00164413
STOX1	2.86575	0.00350404
NDC80	2.86114	0.00451536
CFB	2.84783	0.025947
CCN4	2.84386	0.0273816
ACAN	2.83538	0.0167983
CDC20	2.81871	0.00170685
CEP55	2.81669	0.00177403
FOXM1	2.81363	0.00130004
CDCA8	2.81011	0.0069641
IFI44L	2.80943	9.0078e-05
UBE2C	2.79941	0.00787119
HJURP	2.78975	0.00283242
KIF2C	2.76018	0.019752
CKAP2	2.72721	0.00062053
PCLAF	2.7265	0.00278752
LMO1	2.71983	0.00948749
GBP6	2.70997	9.34213e-05
ACKR4	2.67563	0.00329657
ANLN	2.67218	0.000424906
HMMR	2.66561	0.00209702
CENPA	2.63673	0.00307683
TOP2A	2.62801	9.94275e-05
AURKA	2.59389	0.000224924
MELTF	2.58055	0.0457708
IFI44	2.5719	0.000664927
ACSS3	2.56458	9.34213e-05
DEPDC1	2.54714	0.0279225
DLGAP5	2.52745	0.00375884
NEIL3	2.51791	0.0161217
RTP4	2.4888	0.000910915
BANK1	2.47312	0.0178698
RNF213	2.46546	0.000537409
FMO2	2.4486	0.044303
NLRC5	2.41158	0.0457031
ZNF365	2.40633	0.00615215
KNL1	2.39907	0.00707516
VIT	2.3932	0.0214203
MKI67	2.38858	0.00246278
FN1	2.37301	0.000737272
TNFRSF19	2.36644	0.00727179
DHX58	2.35165	0.000113095
ZBP1	2.34094	0.0161504
NUSAP1	2.33092	0.00777806
GPBAR1	2.31872	0.012291
RSAD2	2.3143	0.0127481
COL4A6	2.30505	0.000378343
LRRC17	2.30177	0.00443476
TNFSF10	2.2976	0.00422825
SLC7A3	2.29536	0.00751775
BUB1	2.29156	0.00944773
SAMD15	2.28902	0.016142
NPTX2	2.2718	0.0448345
CDCA3	2.26229	0.022735
KIF23	2.26016	0.00125165
CATSPER4	2.24725	0.0311767
FAM221B	2.23184	0.0065939
TCEA3	2.22306	0.00342746
ABCB1	2.20518	0.00209119
TRMT9B	2.18679	0.0174798
NUF2	2.18576	0.00623575
PITPNM3	2.17019	0.0129151
PTER	2.16172	0.00330991
CDKN3	2.14868	0.0065939
LYPD1	2.14799	0.00969458
PPP5C	2.14372	0.00571257
BIRC5	2.14351	0.031537
ARL14EPL	2.13552	0.000113095
CENPT	2.13379	0.0198183
TROAP	2.1304	0.00944773
XPNPEP2	2.12671	0.000177437
SLC13A4	2.12524	0.0422873
OLFML2B	2.12077	0.00675546
SUSD2	2.09059	0.000404782
SIGLEC1	2.08685	0.0459724
ADAMTS6	2.05349	2.34362e-05
ROBO2	2.04834	9.5686e-06
KIF20A	2.01645	0.0265468
RACGAP1	2.0147	0.00702118
CDKN2C	2.01244	0.0028383
CENPN	2.01111	0.0226079
AOX1	2.01028	6.45006e-05
MAD2L1	2.00968	0.00132709
GATM	1.97403	0.0053737
MIS18BP1	1.95813	7.43853e-06
NOXO1	1.95384	0.0132129
RRM2	1.95127	0.044303
NOD2	1.94929	0.00707516
KIF22	1.94065	0.013165
ARHGAP11A	1.93466	0.00355971
UCHL1	1.92829	0.0325391
IQGAP3	1.92472	0.0127011
CA11	1.91999	0.00520216
KNTC1	1.91922	0.00115421
KIFC1	1.91631	0.0125091
TMEM106A	1.91612	0.00951589
RASL10B	1.91188	0.00051457
SCN7A	1.91179	0.0368615
SFRP2	1.90415	0.0460494
F2RL2	1.90119	0.0457875
NT5C	1.89882	0.0350238
SP110	1.89486	0.0172611
NEK2	1.8852	0.0306549
ARHGEF39	1.88359	0.000818559
KAZALD1	1.87728	0.0497077
SARDH	1.85874	9.07252e-05
KIF15	1.85659	0.00948749
PARP14	1.83725	0.00305473
ASB9	1.83166	0.000805984
CIITA	1.83056	0.0399535
UBE2L6	1.82836	0.00204274
KIF11	1.82759	0.0378983
EIF2AK2	1.81835	0.00937972
PRRX1	1.80551	0.00578018
SORL1	1.78688	0.0268094
SKA3	1.78364	0.00133453
ZMYND15	1.77962	0.0342408
CNTN1	1.77593	0.00443476
CCNB1	1.76684	0.0334021
CLSPN	1.76674	0.00959615
BRCA1	1.76229	0.0044207
CCNB3	1.75999	0.0187154
ALDH1L1	1.748	0.0239518
LTB4R	1.74008	0.0231621
LGALS3BP	1.73182	4.16092e-05
PRC1	1.72713	0.0427777
BMF	1.71707	0.0015562
DDX58	1.71654	0.00942647
CKAP2L	1.70419	0.0381752
ITGB4	1.70217	0.00301743
PIK3IP1	1.70053	0.000452873
RETREG1	1.69799	0.0453148
ZNFX1	1.68544	0.0133686
CKS2	1.68339	0.0457875
RAD54L	1.67874	0.00147338
MDK	1.67088	0.00431911
CSMD2	1.65573	0.0252745
IFIH1	1.65566	0.00356458
SMIM1	1.65502	0.027072
MLLT3	1.647	2.9315e-06
NUPR1	1.62824	0.0162108
MXRA8	1.62574	4.04869e-05
TPPP2	1.62171	0.0311513
NCF4	1.61832	0.0460705
TLL1	1.60692	0.0192454
EPHX1	1.6021	1.33555e-11
BAALC	1.59278	0.00751775
CYB561	1.58244	0.000797767
SGO1	1.57686	0.00469549
PCDH19	1.56621	0.0115579
CMPK2	1.5617	0.00114103
TST	1.55965	0.00476689
CHAD	1.55101	0.0342218
CRACR2B	1.54749	0.00114436
CAPN3	1.52847	0.017508
CILP	1.51992	0.00968783
NPNT	1.51566	0.0077813
KNSTRN	1.51319	0.00969353
RGS7BP	1.50411	0.00450109
PTGR1	1.5022	0.000105774
PLA2G7	1.48589	0.00114436
MMP28	1.47623	0.000247792
GLP1R	1.47489	0.0401352
MAST1	1.47347	0.0235373
PLXDC1	1.46403	0.0433753
MOCOS	1.46143	0.00826724
CFAP54	1.461	0.0439369
DLX4	1.45712	0.0202969
BHLHE41	1.45041	0.0299451
RDM1	1.44932	0.0288786
CERCAM	1.44915	0.00125165
LRMDA	1.4456	0.0292243
GASK1A	1.44444	0.00157908
DBP	1.44364	0.0233692
PLSCR1	1.44353	0.0152209
DKK2	1.44066	0.0308266
SLC2A4RG	1.43893	0.0012912
ATRNL1	1.43874	0.0373554
SEMA3G	1.43435	0.00142287
RUNDC3B	1.4278	0.00233989
NIPSNAP1	1.42071	0.00177106
WNT5A	1.41924	0.0185741
IFIT2	1.41696	0.0227366
LIPA	1.41567	0.0109152
STAT1	1.41532	0.0167468
MGMT	1.4098	0.00212849
NPAS3	1.40453	0.0231642
SMC2	1.39365	0.00161209
PML	1.37244	0.0407763
ADAMTSL2	1.37142	0.0453148
SAPCD1	1.35136	0.0357659
IZUMO4	1.35019	0.0381752
COL21A1	1.34648	0.0307383
ATP2A3	1.34627	0.0402175
PTTG1	1.34484	0.00954894
CFAP69	1.34013	0.0108403
SLC7A10	1.33346	0.0224362
IL15	1.30941	0.0143945
SRPX	1.30683	0.00458733
RHPN1	1.30463	0.0158934
MGP	1.30302	0.0332401
CPQ	1.28983	0.0373554
GPATCH11	1.28625	0.0187219
GAS2L3	1.28533	0.0222458
SPACA9	1.27314	0.0273516
ACAT2	1.26843	0.000446724
CAPG	1.26806	0.0402175
SEMA6C	1.24922	0.00809908
ANO3	1.24695	0.00204274
TRIM59	1.24685	0.032957
SLC46A3	1.24205	0.000956428
DOCK10	1.23719	0.00536995
SLC7A7	1.2342	0.000153567
NPY1R	1.23083	0.0208276
RHNO1	1.23007	0.00606601
GALM	1.22917	0.00606184
ASPA	1.22384	0.0449966
WSCD1	1.22006	0.0229631
CDC25B	1.21607	0.00799552
COL18A1	1.21167	0.00301743
PLXNA4	1.21154	0.0123027
ATP8B4	1.20171	0.00862061
SHBG	1.19752	0.00482456
VDR	1.19716	0.000604065
TEF	1.19419	0.00114103
GM2A	1.19015	0.00953367
ABCG2	1.1899	0.012291
PARP9	1.18965	0.0239386
PLVAP	1.18933	0.0267581
GEN1	1.18852	0.0280385
PRTFDC1	1.18806	0.0251416
EDN1	1.18803	0.0249209
NSUN3	1.17753	0.0414617
MUSTN1	1.17684	0.00726308
SESN3	1.16998	0.00479092
STMN1	1.16504	0.000603878
LACTB2	1.16107	0.027868
YPEL1	1.15065	0.0220527
LAPTM5	1.14531	0.0210534
ABI3BP	1.1435	0.0422916
NT5DC1	1.14178	0.0192302
AGRN	1.13869	0.0202969
PEG3	1.13774	0.00489255
CSF2RB	1.1263	0.0373554
MGST2	1.11076	0.0450861
GHDC	1.1105	0.0369404
TTC8	1.10951	0.0210716
MVP	1.10773	0.0460705
SESN1	1.10678	0.0221636
ENPP2	1.09664	0.0379884
IFIT5	1.096	0.032723
FBXO32	1.09061	0.00246278
ZSWIM7	1.08095	0.0101059
CHCHD6	1.07843	0.0459724
IRS1	1.07356	0.0259696
UROC1	1.07349	0.0460494
TMED3	1.06702	0.0422565
LRBA	1.0667	0.00286926
BRCA2	1.05658	0.0110225
TSPAN7	1.04381	0.0354949
FAM171A1	1.03984	0.019752
UCP2	1.0246	0.0298031
DMXL2	1.0035	0.0425365
FAM210B	1.00151	0.0149101
ACCS	0.997484	0.0169981
NREP	0.985222	0.0156922
CCDC92	0.977611	0.0129151
NMRAL1	0.974115	0.00948749
ADGRE5	0.968837	0.0112596
QDPR	0.949199	0.00406428
PRXL2B	0.924229	0.0422873
OSBPL3	0.9223	0.0479905
SMARCA2	0.917014	0.00862856
SGSH	0.911745	0.0159109
TNFAIP6	0.91047	0.0355411
RAPGEF5	0.904239	0.0385483
MED21	0.895558	0.00209702
SH3BGRL	0.892305	0.0017705
FAM149A	0.88324	0.03396
SAT2	0.867769	0.0388439
SYNE2	0.865562	0.0466467
S100A14	0.856809	0.0434934
TTF2	0.848683	0.0273083
KANK1	0.845794	0.0250548
ABHD4	0.840722	0.0220527
RAB13	0.819831	0.00483588
CELSR1	0.814299	0.0225693
MMD	0.794693	0.0289288
CARD6	0.776836	0.0082771
SMIM14	0.770341	0.0148787
S100A13	0.769724	0.0485389
NATD1	0.76761	0.000391206
GADD45A	0.764105	0.0410064
CNPY4	0.755145	0.0481706
LMO2	0.753716	0.0490951
BBS2	0.73616	0.0102901
HYAL1	0.731046	0.000807703
HEXB	0.709996	0.0337309
SPATA24	0.701641	0.0348515
THSD1	0.648289	0.0459724
RNF187	0.599954	0.022823
TM7SF3	0.597006	0.0433753
MAP1LC3B	0.590731	0.0452685
DPY19L1	0.590399	0.00968783
ACVR1	0.555082	0.044303
HMGB2	0.5527	0.0418142

## Sheet: BAT cold DOWN
Gene	log2FoldChange	FDR
AKAP1	-3.70888	0.00278752
CCL1	-3.51949	0.0069641
CACNA1G	-3.17594	1.48871e-13
TUBA4A	-2.9122	3.19438e-10
CBARP	-2.87148	0.000502703
APLN	-2.78013	0.000124983
CRHR2	-2.69159	0.044303
IL1RN	-2.6435	0.00170685
PHOSPHO1	-2.62941	7.46035e-08
UPP1	-2.62211	4.94653e-05
TUBA8	-2.56241	0.0077813
SAPCD2	-2.45338	0.00324596
SLC16A5	-2.44373	0.000558195
ACOX2	-2.44286	5.56452e-07
ONECUT2	-2.43351	0.0145098
NMRK2	-2.40545	0.00866637
ASPHD2	-2.35335	0.000247792
MASP1	-2.35249	1.21424e-05
COMP	-2.31914	0.0310485
TMEM266	-2.2867	0.0129738
ARMC7	-2.24188	0.00062053
TRPM3	-2.21349	1.83744e-05
PSD2	-2.13511	0.00603513
TMEM182	-2.06736	0.0382767
CLSTN2	-2.02709	0.0117325
SSC4D	-1.96761	0.0435366
ZFP36	-1.95668	0.000158068
IL7R	-1.93673	0.0147723
SMPD3	-1.89371	0.000483248
KCNAB3	-1.83585	0.000694568
SLC7A5	-1.81425	1.45872e-05
VEGFA	-1.79209	0.00173632
MYO5B	-1.77178	0.00373378
FABP3	-1.74223	0.0222458
HYOU1	-1.73143	3.74565e-07
AKAP12	-1.71548	0.00132709
HSPA5	-1.71383	0.00166041
GPR17	-1.71121	0.0135566
SPRED3	-1.70634	1.99503e-06
C7	-1.6651	0.0182078
P4HA1	-1.64303	9.07252e-05
FGF12	-1.63479	0.00728315
XYLT1	-1.63406	0.00903895
CNKSR3	-1.63046	4.42254e-05
ACOT7	-1.62072	0.0404267
BCL6	-1.61753	0.0337309
HS3ST2	-1.61555	0.0383917
RDH13	-1.5909	0.00209702
STAC3	-1.58048	0.0165167
MTHFD1L	-1.57831	0.0044207
PNMA2	-1.57054	0.0310226
RPF2	-1.56348	0.000276844
GUCA1A	-1.54398	9.34213e-05
SPRY4	-1.51932	0.0301045
CSDC2	-1.51697	0.0135437
WDR77	-1.51545	0.000224924
KCNG2	-1.50985	0.0204416
ABCC3	-1.49827	0.00170685
RGS16	-1.49755	0.00615215
STAC2	-1.49689	0.00837217
STAC	-1.49176	1.31951e-06
CRELD2	-1.48982	0.0129738
NOP14	-1.48294	0.00062053
CCDC86	-1.44489	0.000105774
SDC4	-1.43613	0.0153505
SLC51B	-1.43047	0.0473462
TFRC	-1.41051	0.0224719
MDGA1	-1.40647	0.0295205
NOS3	-1.4012	0.00197253
PCDH12	-1.39775	0.0203342
ABHD8	-1.39736	0.0185601
RRS1	-1.38901	0.00229599
SPATA5	-1.38036	1.04057e-05
NLRC3	-1.34911	0.0206973
MAMSTR	-1.34001	0.0337309
NACAD	-1.33985	0.0192302
MDFI	-1.33826	0.0117325
GOT1	-1.33647	0.00113626
SDK2	-1.33299	0.0474332
HCRTR1	-1.33112	0.0490045
PLOD2	-1.32779	0.012291
ZFAND2A	-1.30183	0.00644435
TENM4	-1.30148	0.0368615
ERO1A	-1.29171	9.52389e-07
PUSL1	-1.29032	0.0156798
KIAA1522	-1.28677	0.0086252
SLC17A9	-1.27241	0.0487425
MANF	-1.27149	0.00467915
PABPC1L	-1.27017	0.0499049
LRFN4	-1.2665	0.000665817
UGDH	-1.26431	0.0281097
SPRY1	-1.26208	0.00707516
PRAG1	-1.25502	0.0132129
CCDC134	-1.25205	0.022735
SH2B2	-1.24766	0.0268769
SLC38A1	-1.24742	0.0136341
SRCIN1	-1.24702	0.00342746
RRP12	-1.24692	0.00244929
CS	-1.24628	0.00278752
FDXACB1	-1.24528	0.0108403
ARL5A	-1.2438	0.021691
WDR4	-1.23664	0.00726308
FSD1L	-1.23043	0.000169442
CCND1	-1.22988	2.34362e-05
NUP210L	-1.22306	0.000173878
TMEM171	-1.22219	0.0435768
VSIG2	-1.21089	0.0383917
AGTR1	-1.20926	0.00410272
PNO1	-1.20584	9.07252e-05
SLC16A3	-1.20172	0.0145158
METTL1	-1.19774	0.0367601
NDUFAF4	-1.19291	0.00727179
NIP7	-1.19079	3.51193e-05
ATP5MC1	-1.1888	0.00615215
GAR1	-1.18518	0.00335521
NLRP6	-1.18253	0.0256697
MRI1	-1.18154	0.000911942
POLR3G	-1.16193	0.00710752
SMYD5	-1.16087	0.0152015
ABCA3	-1.15872	0.0324331
TEAD4	-1.15628	0.0272587
PWP2	-1.1546	0.00367987
UBASH3B	-1.15346	0.00799552
ENPEP	-1.1479	0.0116381
RPIA	-1.14243	0.00451536
NAT10	-1.13589	0.0133686
RASGEF1A	-1.13108	0.0131771
MLEC	-1.12847	0.000350588
PTPRE	-1.12238	0.0352232
MAFF	-1.11729	0.0304469
TIMM9	-1.1129	0.00106864
PFKL	-1.10819	0.0180088
TAF4B	-1.10686	0.0147959
ABCB9	-1.10685	0.00342566
RSL1D1	-1.10059	0.000106369
DIS3	-1.09701	0.0469208
PUS7	-1.09676	0.0225833
ACO1	-1.09586	0.0485389
TIMM8A	-1.09257	0.0229631
RAPGEF4	-1.09118	0.0441897
MST1	-1.09028	0.045278
GNL3	-1.08872	0.0101059
IDH3A	-1.08746	0.0105004
FAM136A	-1.08653	0.000976363
SRL	-1.08208	0.0378983
SLC2A1	-1.07632	0.0161504
PPRC1	-1.07217	0.0012912
IFRD2	-1.06576	0.00170685
IVNS1ABP	-1.06317	0.0315799
GMPPB	-1.06183	0.00046614
SNTA1	-1.0598	0.00582635
NCOR2	-1.05753	0.00261665
SVOPL	-1.05673	0.0131771
MYBBP1A	-1.05534	0.0109182
RRP7A	-1.04978	0.0133239
NABP1	-1.04777	0.0305331
ATP1B3	-1.04259	0.00122124
CABP1	-1.03452	0.0337309
CAPN15	-1.03032	0.0249209
A4GALT	-1.02772	0.0453052
TSR1	-1.02672	0.0110225
RRP15	-1.01616	0.0040174
IMP4	-1.01535	0.0111426
SDF2L1	-1.00954	0.0453148
PFAS	-1.00702	0.00450109
SLC12A4	-1.00623	9.51325e-05
NGLY1	-1.00622	0.0225833
PPARD	-1.00087	0.0369404
ANKRD24	-1.00063	0.00128649
GLIS2	-0.997245	0.0149101
PCYT2	-0.992659	0.00794591
DNAJA4	-0.992655	0.00674004
AHCYL1	-0.992011	0.0440706
IDH2	-0.991151	0.00937972
ERLIN1	-0.990338	0.00287383
INTS1	-0.989032	0.00801878
BOP1	-0.988126	0.00287383
PCDH18	-0.986861	0.0265794
PKDCC	-0.98478	0.00161209
HIGD1A	-0.982546	0.00412358
NSUN6	-0.977663	0.00443476
VARS	-0.973821	0.00367987
EMG1	-0.973276	0.0115478
RHOBTB2	-0.972393	0.0150962
GRWD1	-0.971332	0.00345882
CALR	-0.967918	0.0204912
RAPH1	-0.964372	0.00168735
PIM2	-0.960047	0.0366268
GPR4	-0.957571	0.0308266
SLC16A1	-0.955471	0.0307383
NOP16	-0.953695	0.00210512
NOLC1	-0.951252	0.0439369
NOL6	-0.950527	0.012566
PSD3	-0.949443	0.0189685
NOP2	-0.94706	0.0285852
TMEM41A	-0.941176	0.0369404
UTP20	-0.940498	0.0109182
GIPC3	-0.939468	0.0353263
TRMT1	-0.935296	0.0305331
TRIM16	-0.934978	0.0386124
CHST1	-0.934633	0.00813521
CRY1	-0.933565	0.0485389
EEF1E1	-0.92994	0.000976363
MAK16	-0.929398	0.00184289
AEN	-0.928418	0.0174005
FKBP4	-0.924335	0.0010147
ECM1	-0.920767	0.0153682
RASGRF2	-0.916895	0.0222835
KIAA1217	-0.91484	0.0453148
RPP38	-0.91386	0.0292243
WDR12	-0.912025	0.0352232
LTV1	-0.910133	0.0150337
RBM34	-0.908547	0.0211712
GRPEL1	-0.907064	0.048003
NT5C3B	-0.906418	0.0475001
GNPNAT1	-0.90468	0.0484197
RFESD	-0.903498	0.0131771
ARRDC3	-0.903018	0.0299325
PDIA4	-0.902924	0.0352044
DNAJB11	-0.900372	0.0191528
SLC29A1	-0.896644	0.019752
B3GNTL1	-0.89479	0.0457875
RGL1	-0.894344	0.000203616
INTS2	-0.892988	0.0117966
TTC31	-0.891507	0.0185601
LPCAT3	-0.888982	0.0134706
SCAF1	-0.88866	0.00505922
ODF3	-0.886913	0.0149101
DHRS11	-0.885519	0.00161209
NAA40	-0.883404	0.0131771
SH2D3C	-0.882836	0.0215146
TINAGL1	-0.877778	0.0210517
FTSJ3	-0.876362	0.0155184
SLC5A3	-0.876158	0.0233692
DPP9	-0.874959	0.0143997
DDX56	-0.872474	0.032957
NOP9	-0.87195	0.00844828
HSPA13	-0.867332	0.0138264
MRTO4	-0.866487	0.0106752
SRM	-0.863661	0.0477225
ALG5	-0.863218	0.00269775
AMMECR1	-0.863117	0.0208276
UTP4	-0.857804	0.00862061
NEDD4L	-0.856858	0.0191528
SLC41A1	-0.856642	0.00483588
WDR36	-0.849952	0.0163406
ATP11A	-0.84597	0.0415843
ASAP1	-0.838619	0.00919696
PIGW	-0.838434	0.0131771
HAPLN3	-0.834088	0.0382309
PLXNA1	-0.832327	0.00209119
FBL	-0.831491	0.000818559
ADAMTS12	-0.830977	0.0388517
PUM3	-0.830478	0.0458743
DOCK5	-0.828966	0.0198911
NHP2	-0.828806	0.00106813
HSPBP1	-0.82393	0.00203798
POLR3E	-0.823583	0.0133686
ERGIC1	-0.822877	0.0185601
RIN3	-0.822851	0.0450988
TMEM126A	-0.82241	0.0123399
MRPL21	-0.822199	0.0301586
UTP15	-0.821938	0.0246272
NIFK	-0.820519	0.0218644
MED22	-0.820238	0.00428118
PGM2	-0.82005	0.0321238
TIMM50	-0.819673	0.0382309
RRP8	-0.81707	0.03396
PTGDR2	-0.816566	0.0369404
GEMIN5	-0.815909	0.0019211
STIP1	-0.815523	0.0204441
VCL	-0.815287	0.019752
BYSL	-0.812264	0.0123727
HSPA4	-0.810023	0.00476689
SRPRB	-0.803143	0.0208276
GOSR2	-0.802678	0.0127452
SAR1B	-0.802344	0.0179057
CCT6A	-0.801955	0.0265468
EIF4A1	-0.80135	0.0177835
TNFAIP1	-0.801144	0.00898736
USP10	-0.799609	0.00115421
E2F4	-0.798118	0.0165844
PDSS1	-0.793641	0.00759606
ADAMTS9	-0.791958	0.0395932
RNF149	-0.790241	0.0106917
DET1	-0.787967	0.0124728
ROBO4	-0.787664	0.0279104
MRPL15	-0.787282	0.00246278
NAF1	-0.787075	0.0337309
ADAM19	-0.782017	0.0293466
PA2G4	-0.78148	0.00373378
POLR2E	-0.772365	0.00125165
RUVBL1	-0.771398	0.0191528
ZNF445	-0.7674	0.0160927
MAPKAPK2	-0.767214	0.0350121
COL4A2	-0.765954	0.00479092
ATP1A1	-0.76518	0.000903053
HGH1	-0.7627	0.0153682
UMPS	-0.762305	0.0231621
SLC35B1	-0.75827	0.0265468
WDR43	-0.758088	0.0212929
KIF16B	-0.757462	0.0109182
ZNF12	-0.757314	0.0305725
DPH1	-0.754029	0.0452139
SUGP2	-0.753671	0.0342408
FUBP1	-0.753237	0.0425855
NUS1	-0.752617	0.00309986
SPCS3	-0.752292	0.00951589
YRDC	-0.750731	0.0247419
CARNMT1	-0.749731	0.0106434
GTF2H3	-0.749225	0.0118428
KDR	-0.749085	0.010038
ARL8A	-0.748878	0.0348515
PRDM2	-0.747448	0.0256697
STYX	-0.744045	0.0220527
ENDOV	-0.742444	0.031244
YARS	-0.739332	0.00043969
FZD4	-0.739078	0.0106425
PRMT1	-0.737519	0.00299929
HSPB1	-0.736724	0.0297671
ABCE1	-0.734928	0.00469549
ENTPD6	-0.731784	0.0265468
CHERP	-0.731231	0.0152756
XPO5	-0.730565	0.0348428
MYO1C	-0.730322	0.0130672
DUS3L	-0.730066	0.016302
MAP2K1	-0.727666	0.0279104
PRMT3	-0.726254	0.0439182
COL4A1	-0.723747	0.00399785
DNAJC25	-0.719397	0.0354949
FAM219A	-0.717629	0.0308204
GIT1	-0.716406	0.0371628
COL15A1	-0.713606	0.0493838
BCCIP	-0.709038	0.00662813
MAVS	-0.706923	0.0244055
FARSB	-0.704774	0.0198911
CCT5	-0.703906	0.00599738
FKBP3	-0.703666	0.0435366
PLPP3	-0.702482	0.00952175
HK1	-0.699311	0.0187154
HGS	-0.697468	0.0115579
STK10	-0.696019	0.0186153
NAA20	-0.69511	0.0308204
TOMM5	-0.693471	0.0383917
PSMD14	-0.693425	0.0306549
LSM12	-0.693269	0.0457875
PFDN6	-0.692587	0.0198911
MTERF3	-0.691339	0.0129151
SNRNP40	-0.688757	0.0439182
MAT2A	-0.687769	0.0333378
CPSF1	-0.686605	0.0265468
PSMD3	-0.685138	0.0101394
DRAP1	-0.682054	0.0106558
CANX	-0.681205	0.017724
SCAF4	-0.680957	0.00951589
PDCD11	-0.678977	0.0110304
CIAO2B	-0.676356	0.027253
NCDN	-0.675418	0.0152756
AKAP10	-0.672826	0.0204912
AHDC1	-0.670895	0.0414525
ANKRD52	-0.664922	0.031537
TXNDC12	-0.663099	0.0354906
PHB	-0.662918	0.0318347
MRPL20	-0.662791	0.0082839
BACE1	-0.659033	0.0362795
SNRPA	-0.656403	0.0383704
ETV6	-0.65547	0.0162953
ZPR1	-0.654336	0.00810728
ABCF2	-0.650224	0.0342698
ARPC5L	-0.649849	0.00682306
MYH9	-0.648617	0.00725374
EXOC6B	-0.64828	0.0123399
TIMM13	-0.644121	0.0404267
CERS2	-0.638862	0.0151274
PIGC	-0.637003	0.0152209
AASDHPPT	-0.636327	0.032355
GSPT1	-0.633549	0.00844828
CIAPIN1	-0.633225	0.0489453
EIF2S1	-0.631691	0.0455052
MESD	-0.631306	0.00526899
CNOT9	-0.630586	0.0191528
PDCD5	-0.622014	0.0186004
NAA50	-0.616034	0.0257077
PITPNB	-0.615857	0.0297818
PHC2	-0.615221	0.0356565
PSMD11	-0.61471	0.0102775
G3BP1	-0.614149	0.0343667
PRR13	-0.611895	0.0246272
POLR2D	-0.610493	0.0453463
CIZ1	-0.608991	0.0208234
TOMM20	-0.608662	0.0283238
NAA10	-0.60855	0.00533899
RAD23A	-0.608344	0.00341431
PPP1R37	-0.608321	0.0346181
SH2B3	-0.60727	0.0473537
EIF3B	-0.60674	0.0489453
RCE1	-0.604489	0.0109152
IMPAD1	-0.604458	0.0236464
WRAP53	-0.600622	0.025947
PTPA	-0.600081	0.0368615
USP5	-0.594406	0.0297051
HIKESHI	-0.590839	0.0319382
YEATS2	-0.590243	0.0377883
TFE3	-0.590233	0.0239518
CHID1	-0.585424	0.0398716
PIEZO1	-0.573115	0.0399535
MRPL52	-0.570175	0.0409866
EIF4E2	-0.569423	0.0453148
HRAS	-0.565213	0.0407763
RANBP1	-0.561921	0.0402175
DAB2IP	-0.559016	0.0330559
SNRPC	-0.55518	0.0295205

## Sheet: BAT atemp UP
Gene	log2FoldChange	FDR
GLYAT	9.79595	8.09248e-05
ASPG	8.29076	0.000433642
CYP1A1	7.33441	0.00198837
ABCC8	6.32768	5.81644e-05
PRSS35	5.88496	8.86029e-05
GALNT5	5.81514	0.00327209
GAS2L2	5.74431	1.45197e-10
CXCL10	5.52958	0.00179086
FFAR4	5.27217	0.000365933
IFI6	5.03258	4.0438e-13
ISG15	4.91688	1.35813e-09
RHBDL1	4.78443	1.47269e-15
CES4A	4.74299	0.000737258
DPEP3	4.45061	5.70033e-05
TDRD9	4.4082	2.95437e-06
TG	4.26998	0.0327614
MX1	4.07809	8.68405e-09
KRT19	4.03679	0.026047
MELTF	4.00492	0.000174091
WNT6	3.97846	0.00164075
SLC47A2	3.97256	0.00608066
C4BPA	3.94904	0.0102061
LRRC36	3.90794	0.000404911
THRSP	3.8976	6.61016e-08
CCN5	3.87823	0.000826542
HERC6	3.80141	3.57066e-05
ACKR4	3.74398	2.58967e-06
KCNK2	3.71726	0.00123896
IFIT1	3.68595	1.12389e-07
TCEA3	3.67774	1.17657e-08
CFB	3.65881	0.000929973
LRRN4	3.54249	0.0135753
PCK1	3.53908	0.00185397
SLC22A18	3.53233	0.000292482
TNFRSF19	3.48116	4.06838e-06
LRRC31	3.47042	0.000410187
FMOD	3.44342	0.00377956
GSTA1	3.42136	0.0299111
COL28A1	3.34297	0.00188488
SSUH2	3.33779	0.000576515
MTUS2	3.32047	0.00128984
FMO2	3.31169	0.00125355
OTOR	3.2264	0.0237366
COL4A6	3.21863	1.8939e-08
PITPNM3	3.19258	2.26699e-05
SLC4A11	3.1624	0.000115304
CTHRC1	3.15971	0.0012325
CENPW	3.15322	0.00305286
NNAT	3.14256	0.0424026
LRRC17	3.13949	1.00635e-05
ECT2L	3.0764	0.00783358
XPNPEP2	3.07563	9.6115e-10
SARDH	3.06387	1.41838e-13
COL6A6	3.01613	0.0108557
NOD2	2.97248	1.23499e-06
SLC13A4	2.97143	0.000696239
ETNPPL	2.9344	0.00167481
NOS2	2.9092	0.00127419
SPP1	2.90192	0.0240263
CA11	2.90148	8.64401e-07
FAM221B	2.89062	6.7578e-05
MYH15	2.87972	0.000248458
TRO	2.87173	0.00846208
GHSR	2.86302	1.0875e-06
RBP4	2.8493	3.17121e-06
IQCA1	2.84497	0.0130488
RIMS3	2.8213	0.000800261
CAMK2B	2.81342	0.016803
UPK3B	2.78376	0.0465444
GPT2	2.77837	5.85244e-05
CCN4	2.77706	0.0173313
ALDH1L1	2.77246	2.33077e-05
NOXO1	2.76378	5.39816e-05
PGR	2.76362	0.000233662
LGALS12	2.7454	0.00198562
CCDC197	2.73973	0.0055488
ZMYND15	2.68477	0.000141063
KIF4A	2.67591	0.0131891
MAPK15	2.67493	0.0164166
GABBR2	2.64447	0.00205901
SCTR	2.64183	0.00607183
SORL1	2.62711	0.000126984
NOXA1	2.6183	0.000198743
CNGA2	2.59038	0.000650797
C3AR1	2.58827	0.0323519
GPNMB	2.563	0.0177017
PPP5C	2.54825	0.000241863
NEURL3	2.53568	5.64958e-06
SLC2A11	2.53467	0.0146747
XAF1	2.53153	0.000107101
CFI	2.5312	0.000712533
PELI3	2.52353	0.00499751
CGN	2.51388	0.00594031
ADAMTS19	2.51255	0.00668586
STOX1	2.51255	0.00653642
ACSS3	2.51203	6.07058e-05
PATL2	2.51156	0.000728298
EPSTI1	2.50672	0.00142147
RASL10B	2.48321	4.52251e-07
IFI44L	2.48303	0.000311037
KCNJ11	2.47996	0.0126239
CPEB1	2.46437	0.000695133
SLC47A1	2.45459	0.00487261
SMIM1	2.45202	0.000107323
HAAO	2.41494	0.00865306
GATM	2.39878	0.000153618
ROBO2	2.39208	2.64365e-08
PIK3IP1	2.39105	2.0113e-08
NCKAP5	2.38789	0.00127419
NPTX2	2.38642	0.0170176
BUB1B	2.38402	0.00551557
CENPF	2.37954	0.000395177
LMO1	2.37529	0.0155883
MBP	2.37092	0.00676555
SPC24	2.35794	0.0226386
SH2D6	2.35733	0.0138381
SHCBP1	2.34585	0.0212546
CDCA8	2.33717	0.0175764
ASPM	2.33579	0.00963393
BATF2	2.33552	0.0350501
GRID2IP	2.3318	0.0149218
IRF7	2.32974	0.0038846
BCAS1	2.32928	0.0333494
MEI1	2.32585	0.0272702
SLC1A1	2.32242	0.0120719
SAMD13	2.32047	0.00699064
HSF4	2.31143	6.93147e-05
SIGLEC11	2.30643	0.029987
NTSR2	2.30479	0.0292077
VIT	2.30316	0.0152151
OLFML2B	2.30114	0.00110278
IGSF10	2.28225	0.000904054
ILDR2	2.28208	1.25283e-06
RTP4	2.27785	0.00123629
CATSPER4	2.27497	0.0148664
GBP6	2.26705	0.000752127
IZUMO4	2.26661	2.4e-05
LEP	2.2616	0.024287
LYPD1	2.25028	0.00279327
HJURP	2.24458	0.0122598
TST	2.2423	3.18135e-06
ARL14EPL	2.22693	2.29167e-05
IFIT3	2.21617	0.0145196
TTK	2.20585	0.0121812
SUSD2	2.19957	6.52448e-05
TLL1	2.19553	0.000213511
CRISPLD1	2.19425	0.044176
ATP2A3	2.18195	6.20594e-05
AOX1	2.18147	3.52891e-06
MAST1	2.17243	8.86029e-05
KY	2.17139	0.0276847
MINAR2	2.16617	0.00167218
CNTN1	2.16502	0.000102106
DBP	2.15295	7.48754e-05
SLC2A4RG	2.14134	3.72537e-08
SNAP25	2.13452	0.0203992
PDGFRL	2.12776	0.00330632
DHX58	2.12443	0.000296367
SH2D4B	2.12168	0.0244786
NEIL3	2.12137	0.0310097
FAM57B	2.11887	0.00912158
BANK1	2.11495	0.0301037
ZBP1	2.09886	0.0200221
UBE2C	2.0912	0.0397138
ABCA6	2.08989	0.00026274
CENPE	2.08928	0.00342659
HPN	2.088	0.0185562
PRRX1	2.08603	0.000374668
PCDH19	2.08037	0.000117656
ATRNL1	2.07902	0.00033451
CXCR4	2.07293	0.015736
DPEP2	2.06426	0.0245251
BCHE	2.06422	0.000581558
CFAP54	2.06258	0.000687589
MXRA8	2.06082	1.12162e-08
NTRK2	2.06015	0.000200582
TAC1	2.05549	0.0413499
CAPN3	2.05458	0.00022737
TBX1	2.05432	0.0426743
CAMKV	2.05297	0.0138475
EDA	2.05225	0.00100997
CSMD2	2.03563	0.00156814
GRIK4	2.03445	0.0203941
BMPER	2.02663	0.0229184
MIS18BP1	2.02321	1.26118e-06
TMEM102	2.01999	0.0183991
FBP1	2.01757	0.000190974
PTPRD	2.01685	0.0089203
KLHL3	2.01217	0.000502835
RNF43	2.01029	0.0412412
BMF	2.00695	4.99734e-05
AURKA	2.00421	0.00376833
NDC80	2.00256	0.0435736
WT1	1.99418	0.00857196
ABCG2	1.99326	5.98421e-07
PFKFB1	1.99159	0.000431307
TNFSF10	1.98905	0.00836002
TRMT9B	1.98847	0.0192351
FOXM1	1.97149	0.0229184
ASB9	1.97043	9.26677e-05
NCF4	1.96191	0.00491342
CDCA3	1.96108	0.0336744
SLC4A5	1.95884	0.00908392
RNASE6	1.95775	0.0152737
SAMD15	1.9544	0.0291143
FNDC5	1.95097	0.000433028
SP110	1.94493	0.00671257
CEP55	1.94036	0.0299111
SCN7A	1.92445	0.0186298
LUM	1.92304	0.0240191
RTN4RL1	1.91809	0.00126149
SLC7A10	1.91761	0.000123674
PTER	1.91749	0.00551557
CYB561	1.91514	7.0582e-06
KAZALD1	1.91459	0.0241494
NOX5	1.91108	0.0286747
DNA2	1.90755	0.0177703
WNT5A	1.90538	0.000259976
PRR16	1.90532	0.00719271
SMOC2	1.89925	0.000237336
GPBAR1	1.89787	0.0299111
NPNT	1.89561	0.000166116
F2RL2	1.89069	0.026047
DDX4	1.89027	0.0457948
TOP2A	1.8875	0.00498144
HNF4A	1.87354	0.0228657
FBXO24	1.86677	0.0183273
MST1R	1.86589	0.00211217
CIITA	1.86417	0.0186741
RETREG1	1.86085	0.0123303
PCDH9	1.85565	0.0342194
ZBTB16	1.85347	0.0148531
SHMT1	1.84242	0.009658
CPQ	1.84002	0.000414927
MDK	1.83887	0.000518419
TPPP2	1.83458	0.00534676
SLC45A4	1.83372	0.00110011
CRACR2B	1.82709	2.42299e-05
DLGAP5	1.82695	0.032042
UBXN11	1.82657	0.00219371
ANGPTL1	1.82528	0.0053029
FN1	1.8237	0.00726948
ZNF365	1.8221	0.031433
BHLHE41	1.82006	0.00159994
SAPCD1	1.81814	0.000828505
SFRP2	1.81554	0.0346806
CENPT	1.81012	0.034567
UROC1	1.80831	4.26962e-05
RUNDC3A	1.80371	0.0308089
METTL27	1.80028	0.000920678
CATSPERG	1.8001	0.00512499
C1S	1.79195	0.0118471
RNF213	1.79124	0.0102805
HMMR	1.79082	0.0381843
EPHB6	1.78677	0.036776
PER3	1.78503	0.00775928
PTCH2	1.78444	0.0118011
RAPGEF5	1.78094	3.79454e-07
CERCAM	1.7715	1.28648e-05
ATP6AP1L	1.77139	0.033775
CSF2RB	1.77029	8.86029e-05
ITGB4	1.76969	0.000759852
COL4A5	1.76669	0.000353941
C1R	1.76317	0.00894842
IFT122	1.76129	0.000732504
CPT1C	1.75805	3.41363e-06
FAM167B	1.75575	0.0389129
ADAMTS7	1.74671	0.000458478
TENM1	1.745	0.0399606
RORC	1.74315	0.016735
ADAMTS6	1.73905	0.00026274
IL16	1.73085	0.000274102
CHAD	1.72788	0.00700553
PLA2R1	1.72731	0.0356324
CFAP69	1.71932	0.000193138
CKAP2	1.71733	0.0324381
TOX2	1.71458	0.0347548
AKAP7	1.71297	0.00159066
IMPDH1	1.70689	0.00487081
WFDC3	1.70215	0.00570791
GASK1A	1.70189	4.22792e-05
RAD54L	1.69975	0.000507859
NUPR1	1.69881	0.00534429
RBFOX3	1.6957	0.0308089
SLC7A7	1.69304	7.44888e-09
BAALC	1.69273	0.00167218
RRAD	1.68999	0.00237781
SKA3	1.68779	0.00123141
ADCYAP1R1	1.68665	0.0271264
DHRS12	1.68325	0.000244527
DDIT4L	1.67696	0.00187566
CDKL1	1.67443	0.00203324
IL3RA	1.67283	0.0260875
ANLN	1.67115	0.0292499
ORMDL3	1.6672	0.000564098
PTGR1	1.66613	4.06838e-06
SHBG	1.66504	7.22971e-06
COL7A1	1.66286	0.00681426
KNTC1	1.66282	0.00300806
MOK	1.65946	0.0151448
ANXA13	1.65894	0.0262936
RDM1	1.65791	0.00427019
CILP	1.6532	0.00176646
MYRIP	1.65185	0.00929326
MAD2L1	1.6494	0.00613405
FST	1.64224	0.0037093
HCAR2	1.63905	0.00551411
RPS6KA6	1.63542	0.000127447
GCA	1.63097	0.0048424
PKHD1L1	1.62658	0.0499094
KIF22	1.62252	0.0276254
SAXO2	1.6221	0.0221891
ROBO1	1.61929	0.000414927
BOC	1.61793	0.00122601
BICC1	1.61762	0.00713031
ENPP2	1.6129	0.000277631
COL21A1	1.60882	0.00300772
SESN3	1.60751	1.03173e-05
GPR156	1.60523	0.0221772
BRCA1	1.60381	0.00544609
PEG3	1.59962	6.17281e-06
LIPA	1.59613	0.001296
MVP	1.59398	0.000634377
DMTN	1.59299	0.00784115
ATP8B4	1.59198	7.37138e-05
TSNAXIP1	1.58919	0.0163392
MMP23B	1.58745	0.00335301
NAIP	1.58742	0.0425063
DLX4	1.58281	0.00463738
TTC8	1.58072	0.000123943
PRTFDC1	1.57901	0.000535
MMP28	1.57527	3.04011e-05
PARD3B	1.56562	0.0377098
PAPLN	1.56336	0.0328012
ESR1	1.55475	0.00935369
AADACL3	1.55439	0.000826542
LACTB2	1.54933	0.000620306
MLLT3	1.54729	7.52745e-06
HYI	1.53946	0.000189516
GLT8D2	1.53649	0.00976979
ABI3BP	1.53638	0.00126434
RNF224	1.53363	0.0346288
IGF1	1.53226	0.00552524
B3GALNT1	1.52503	0.0231372
PCSK4	1.52309	0.0234483
MXD3	1.52197	0.0085072
HOGA1	1.52055	0.0196777
KCP	1.51944	0.00653642
TLR1	1.51023	0.00822672
LRMDA	1.5078	0.0106683
MID1IP1	1.50611	0.00283259
ASAP3	1.50545	0.00935496
ZSWIM7	1.49732	4.45411e-05
AQP7	1.4962	0.0145803
CACNA1A	1.49379	0.0101912
ETNK2	1.49114	0.0221298
SEMA6C	1.4853	0.000394073
STAG3	1.48527	0.0038971
KIF23	1.48349	0.0336461
TBC1D16	1.47412	0.00622539
JADE2	1.47403	0.00391316
MOCOS	1.4731	0.00346693
CDC25B	1.47001	0.000296367
KIF15	1.46895	0.0309112
IFIH1	1.46199	0.00606158
SRPX	1.45726	0.000462555
YBX2	1.45708	0.0195357
TRIM45	1.45606	0.0115451
NAA80	1.45579	0.0285289
SEMA3B	1.45495	0.00565424
HSD11B1L	1.45439	0.00931344
PARP14	1.45349	0.0145954
UBE2L6	1.45167	0.0109268
FAP	1.45027	0.000758317
SESN1	1.44976	0.000529735
EPHB1	1.44741	0.00770534
CLSPN	1.4429	0.0255958
TUFT1	1.44017	0.00907305
GPR153	1.43534	6.15109e-05
SPACA9	1.42206	0.00513131
ANKLE1	1.4196	0.02869
SERPING1	1.41944	0.0363425
NSUN3	1.41915	0.00420369
PRXL2B	1.41807	0.000174551
RND2	1.41795	0.00579399
FSD2	1.41792	0.0185444
ZNF467	1.41615	0.00368908
FIGN	1.41578	0.0112601
ZNF790	1.41519	0.0424279
PPFIA3	1.41264	0.0305517
MGMT	1.41011	0.000916881
SLC46A3	1.4075	4.29916e-05
PHYHD1	1.40733	0.00252103
AGTRAP	1.40447	0.000134156
VDR	1.40295	1.03979e-05
TDRD10	1.4025	0.014657
CNTRL	1.40231	0.0138381
TEF	1.40078	2.70199e-05
COL3A1	1.39838	0.0156854
GRAMD1B	1.3978	0.0296862
NECAB3	1.39378	0.0246132
CHCHD6	1.39134	0.00252103
ADAM33	1.38274	0.0225252
PPEF1	1.38235	0.000518419
KRBA1	1.37843	0.00610201
CLDND2	1.37312	0.00104073
ZNF446	1.36797	0.00288396
TNK2	1.36732	0.0198056
TM7SF2	1.3632	0.00231063
MCTP1	1.3567	0.0386959
PCK2	1.35615	0.049924
CHRNE	1.35591	0.0199245
PDE1A	1.35382	0.00547798
RHPN1	1.35368	0.00547798
FBXO32	1.35251	2.99464e-05
ALDH2	1.35213	0.000634377
MRC2	1.34815	0.0124958
PLXDC1	1.34791	0.0403368
RNF112	1.34414	0.0137295
NPAS3	1.34327	0.01735
MAP2K6	1.33688	0.013102
SELENBP1	1.33085	0.00171181
PRRG2	1.33027	0.0115254
PDE4B	1.32996	0.0019225
CSAD	1.32967	0.000605806
CDKN2C	1.32882	0.0483408
DDX58	1.32873	0.0349046
ARRDC2	1.32776	0.00645695
SMTNL2	1.31883	0.0261606
ARHGEF39	1.31498	0.018051
ARSA	1.31453	0.000266798
AHNAK2	1.31087	0.0186095
PPM1K	1.30844	0.0042543
LAPTM5	1.30793	0.00292969
CMBL	1.30392	0.00559119
ABHD4	1.30067	2.96419e-05
ARHGAP11A	1.29997	0.0488401
MORN3	1.29598	0.047509
SMARCA2	1.29246	2.25912e-05
ANKRD44	1.29154	0.010626
LGALS3BP	1.29128	0.00205161
CCDC171	1.28762	0.00380312
ACCS	1.28761	0.000404911
KCNT1	1.28749	0.0307228
METTL26	1.28283	0.00387147
LDHD	1.28258	0.0374075
DMXL2	1.28186	0.00238897
ZBTB20	1.27895	0.00328416
YPEL1	1.2762	0.00420387
ZNF521	1.27545	0.000145617
BNC2	1.27535	0.00288396
PLA2G7	1.27273	0.00337867
DGKH	1.26964	0.0164166
SLC35D2	1.26846	0.0179163
ACAT2	1.26692	0.000180888
FGFRL1	1.25603	0.0299617
PDLIM2	1.24924	0.0203829
FLRT3	1.24344	0.00168712
SEMA4F	1.2416	0.00544232
SAT2	1.23601	0.000459604
ARL4A	1.23329	0.00525173
RADIL	1.23167	0.0410145
PTPN3	1.23062	0.048063
MGP	1.22702	0.0268534
QDPR	1.22626	2.99119e-05
EFNA1	1.22266	0.000290942
NPY1R	1.22263	0.0113256
MYBL2	1.21489	0.0342194
RGS7BP	1.21131	0.0166388
ASPA	1.20931	0.0265143
TNFSF13	1.20931	0.0268099
S100A14	1.20637	0.000709146
MSH5	1.206	0.0113389
MAMDC2	1.20526	0.0208173
SPINT1	1.20246	0.0259162
FAM117A	1.20206	0.00153199
DZIP3	1.20076	0.0430376
OSBPL3	1.20051	0.00239047
NAV3	1.20041	0.000118097
FAM210B	1.19994	0.000939673
NIPSNAP1	1.1976	0.00564768
VASH1	1.19628	0.036746
ZDHHC13	1.18831	0.0320861
HOXA3	1.18702	0.00832921
GCNT1	1.18624	0.0218531
DOCK10	1.18587	0.00382747
TBC1D8	1.18525	0.0117598
GALM	1.1824	0.0041223
NCAPD3	1.18078	0.00211217
CACNA1D	1.17842	0.028781
SGO1	1.17681	0.0295258
MUSTN1	1.17556	0.00329967
IL15	1.174	0.0182038
TBCEL	1.17069	0.00727412
ANKRD35	1.16804	0.0299617
WWOX	1.16708	0.0177124
CAPG	1.1665	0.0377655
CCDC80	1.16091	0.00382747
NUAK2	1.16006	0.012068
PRDM16	1.15965	0.0411411
SHC4	1.15754	0.0142756
RECQL4	1.15742	0.0358382
NDRG4	1.1567	0.00373003
LVRN	1.15061	0.0228756
ITGA8	1.1401	0.0158528
ZNF277	1.13425	0.000495019
HOMER3	1.13245	0.018662
PLSCR1	1.12953	0.0465444
LRP4	1.12865	0.0412412
TPCN1	1.12831	4.06838e-06
PEX11G	1.12582	0.0320861
PDGFD	1.12443	0.00588042
CSGALNACT1	1.1232	0.0032143
RASSF2	1.12233	0.0068443
ALDH9A1	1.12176	0.000368323
NMRAL1	1.12016	0.000791577
ALDH1A3	1.11871	0.00593288
MYO7A	1.11856	0.0062781
SLC7A9	1.11794	0.0384787
CDC45	1.11729	0.0397138
LTBP3	1.11316	0.0137288
ADIRF	1.11018	0.045209
FANCI	1.10932	0.0479637
LRRC27	1.10751	0.0417098
YPEL3	1.10685	0.00147465
PIK3R6	1.1032	0.00213056
LRBA	1.09248	0.000888778
MEX3B	1.09201	0.00230632
IQGAP2	1.09143	0.0126936
GHDC	1.09062	0.0225507
STARD9	1.08978	0.0294689
SIRT5	1.08833	0.014657
PTK2B	1.08542	0.0294164
WDR62	1.08496	0.0440464
RAB30	1.0847	0.00155903
NECTIN2	1.08458	0.00132353
WNK4	1.08184	0.00325658
BMP4	1.08033	0.0479637
SVIL	1.0789	0.00126434
ALDH1L2	1.0727	0.00750601
TMED3	1.06555	0.0229184
CDC42BPG	1.06337	0.0229557
CTTNBP2	1.06066	0.0152426
OLFML3	1.06023	0.00547673
GAS2L3	1.05688	0.0465444
ORC6	1.05382	0.0183273
PLCB4	1.04909	0.0200161
FAM13A	1.04724	0.028594
SHF	1.04717	0.0424893
PGPEP1	1.0439	0.0282625
LRRC20	1.0426	0.0429868
PTGDS	1.04211	0.00251727
GADD45A	1.04179	0.000973744
TTC28	1.03799	0.000564068
ODF2L	1.03777	0.0177017
BRD3OS	1.03767	0.0361861
TJP1	1.03716	0.00287887
FAM149A	1.03649	0.00420327
SPATA24	1.03282	0.000213511
ANO3	1.02812	0.00784751
GEN1	1.02674	0.0407896
IP6K2	1.02562	0.00892936
NREP	1.02358	0.00534676
BLNK	1.02264	0.024532
LRIG3	1.02133	0.0177917
RCBTB2	1.02097	0.00218141
MXD4	1.01031	0.000674477
CDON	1.00971	0.0251475
EPHX1	1.00549	7.85248e-05
ACP6	1.00433	0.00928211
SUV39H1	1.00362	0.0440464
PLA2G6	1.00184	0.0293485
NPEPL1	0.998706	0.0179578
TAOK3	0.989326	0.048063
KANK1	0.988555	0.00290263
DYRK1B	0.983602	0.0118393
SH3D19	0.981184	0.0159334
UROS	0.980944	0.0262051
ENPP1	0.978769	0.0177703
ZNF618	0.978465	0.0248705
TPGS1	0.971117	0.00339941
PDGFRA	0.969048	0.0336744
PASK	0.968079	0.0456874
SORCS2	0.964251	0.0221891
LLGL2	0.964084	0.0209047
PNPLA7	0.962533	0.0361333
TMOD2	0.962045	0.00685095
PLXNA4	0.960691	0.0368351
COMMD4	0.960671	0.0276847
FOXO3	0.959071	0.0238478
S100A13	0.956194	0.00420327
NME4	0.954106	0.0203992
XG	0.953965	0.0231928
PRCP	0.953337	0.0286508
NEIL1	0.952531	0.0153163
CCDC92	0.95128	0.00810035
IRS1	0.949928	0.0328858
HR	0.949332	0.028594
IDNK	0.948869	0.0115299
TENT5A	0.948336	0.0282492
TRIM2	0.943605	0.0314525
ADGRE5	0.940697	0.00706335
KLHDC8B	0.939585	0.0435736
USP53	0.938219	0.0419734
IGFALS	0.937299	0.0226152
AGRN	0.936778	0.0423131
SDC2	0.935393	0.00498144
SUCLG2	0.935071	0.00244139
CCDC62	0.933199	0.0188309
STMN1	0.933134	0.00427996
RAB13	0.932136	0.000383546
C1QTNF7	0.931848	0.0387047
PTPRK	0.930623	0.0299111
STX10	0.929881	0.0383177
NLGN3	0.92968	0.0273485
TCP11L2	0.925706	0.0182038
TBC1D2B	0.924431	0.000778018
LYSMD2	0.924259	0.0333584
GANC	0.922549	0.0148664
POLD4	0.912667	0.0148664
SH3BGRL	0.911086	0.000557655
HACL1	0.90993	0.0371629
GPCPD1	0.902564	0.00288396
SLC40A1	0.901975	0.0153875
DDR1	0.898502	0.0374075
ENO3	0.896778	0.0394202
TMEM9	0.88936	0.0226643
SLC25A14	0.885957	0.0412279
EFNA5	0.884316	0.0111109
CDK20	0.882127	0.0382808
BRCA2	0.881904	0.0245779
SGSH	0.874143	0.0115497
ALDH3A2	0.870889	0.00788685
ZFPM2	0.869841	0.00271117
PRDX6	0.866743	0.0126239
SGF29	0.862852	0.0248189
SGIP1	0.847265	0.0431266
MED21	0.845021	0.00191978
NCOA7	0.842815	0.0331405
FAM171A1	0.840072	0.0465444
MMD	0.83657	0.00965486
MRE11	0.832243	0.0452377
DSN1	0.832223	0.0386756
ZMIZ2	0.83213	0.0150552
LMO2	0.825315	0.0139156
CC2D2A	0.824303	0.0350501
DAGLA	0.819053	0.0454938
AIG1	0.815782	0.0365183
SYNE2	0.808614	0.0400095
FAM151B	0.805324	0.0485169
TXNRD2	0.804055	0.046431
HOXC6	0.801641	0.0229184
APOE	0.800793	0.0300355
ZNF358	0.800276	0.0194505
COPG2	0.793123	0.0185562
TCTN2	0.790828	0.0264149
SPOCK2	0.790756	0.0495311
ACAD8	0.78902	0.0242755
MPST	0.786945	0.0202172
SGCB	0.782577	0.0127205
PBX1	0.780237	0.0305326
CLIP3	0.778793	0.0345923
TCEA2	0.77701	0.0245779
AKR7A2	0.776743	0.0276915
FDFT1	0.775166	0.0202605
GALNT12	0.769399	0.0391101
CADM1	0.756881	0.0386959
DMAC2L	0.752167	0.0302764
ZNF362	0.750471	0.00225089
NATD1	0.746669	0.000249882
BBS2	0.74294	0.00442601
TOB1	0.739591	0.0262936
CIB1	0.736654	0.0272885
PPM1D	0.732548	0.0418972
ZFHX4	0.727703	0.0285255
PEBP1	0.719331	0.0282625
SIL1	0.716609	0.0293379
SFR1	0.713019	0.0104247
SCCPDH	0.711415	0.0411398
FAM53B	0.70842	0.0413138
NBEA	0.699532	0.0178871
FUCA2	0.699096	0.0483979
SSBP3	0.697271	0.0271326
PAXX	0.696306	0.0222853
LRRC28	0.685281	0.0308782
MXI1	0.67707	0.0183585
MYOC	0.673841	0.0492103
MMP15	0.673446	0.0451695
RPS11	0.663682	0.0286496
CDH5	0.660855	0.0400724
DCAF6	0.650249	0.0268099
CARD6	0.650069	0.0190489
CD2BP2	0.648744	0.0122164
LCMT1	0.640823	0.0223204
RPL35A	0.63446	0.0424781
SMIM14	0.625481	0.0362064
ACAA1	0.624148	0.0465119
PFDN5	0.619472	0.0422105
ADH5	0.61254	0.0173852
DHX40	0.601931	0.0276847
EIF3E	0.600774	0.0178962
UBXN6	0.597196	0.0492103
SSR4	0.581404	0.00870939
RNF187	0.573695	0.0171765
HEXIM1	0.571309	0.00840274
IL11RA	0.571163	0.0249654
TM7SF3	0.56748	0.0328065
RPS5	0.562616	0.0051071
PSMG4	0.552154	0.0209084

## Sheet: BAT atemp DOWN
Gene	log2FoldChange	FDR
AKAP1	-4.68881	2.48795e-05
APLN	-4.37262	1.26783e-11
CCL1	-3.48625	0.00342133
TUB	-3.27018	1.21317e-10
PHOSPHO1	-3.21757	3.24981e-12
ACOX2	-3.10032	1.26783e-11
HCRTR1	-3.05186	7.98407e-09
CACNA1G	-3.04313	1.13984e-12
TUBA4A	-2.96155	1.01141e-10
GPR17	-2.84563	2.05097e-06
SPRY4	-2.81901	8.64401e-07
UPP1	-2.70952	9.74243e-06
SLC6A6	-2.698	0.00699064
IL1RN	-2.64626	0.000706016
NTNG2	-2.60813	0.00159876
CBARP	-2.59827	0.000862324
TRPM3	-2.4768	4.43224e-07
SLC16A5	-2.39987	0.000289986
NMUR1	-2.36684	0.00999032
DNAH2	-2.29354	0.000451108
ARMC7	-2.28827	0.000176319
CCN2	-2.28738	0.00055474
RHBDL2	-2.23208	5.776e-06
SLC16A3	-2.22764	4.7463e-08
LOXL4	-2.17108	0.000782995
CCDC151	-2.16879	0.00295273
NTN3	-2.16169	0.00127089
CNKSR3	-2.14846	2.98751e-09
P4HA1	-2.14388	1.66484e-08
SMPD3	-2.13951	2.05944e-05
STAC	-2.12318	1.41838e-13
ACOT7	-2.11457	0.00178167
CXCL12	-2.10939	0.00018463
PIWIL3	-2.10705	0.00103259
ZFP36	-2.0944	1.85578e-05
TINAGL1	-2.0836	4.11463e-12
RARRES1	-2.07093	0.000260044
PNMA2	-2.05773	0.00104073
MTHFD1L	-2.05454	3.18769e-05
ANKRD37	-2.04674	0.0126936
TM4SF18	-2.04549	0.00190594
GK	-2.02521	0.00366587
AJUBA	-2.02502	2.95437e-06
FABP3	-2.01414	0.00281132
ACE2	-2.01297	0.00203324
WFDC1	-2.01297	4.25237e-05
AKAP12	-1.99406	4.56821e-05
ADAMTS1	-1.95221	0.000507859
GPR4	-1.9386	7.6894e-08
KLHDC7A	-1.91217	0.0150935
NDUFA4L2	-1.90909	0.000380462
DYNC1I1	-1.90249	0.0152424
FRMD5	-1.90115	0.00259639
NR4A3	-1.90067	0.0126197
HSPA5	-1.90026	0.0001425
ONECUT2	-1.89341	0.0460961
ETV4	-1.88974	0.0487333
MASP1	-1.88277	0.000406405
COL8A2	-1.87974	2.82809e-05
NOS3	-1.87369	3.21403e-06
FABP5	-1.86444	0.000107101
FLT1	-1.85635	2.36245e-06
SAPCD2	-1.85195	0.021334
ADAMTS4	-1.84499	0.000295107
MAFF	-1.82527	2.58853e-05
CRELD2	-1.81971	0.000587773
AQP3	-1.81956	0.0185562
GAL	-1.81828	0.00643384
BMP6	-1.81048	6.26686e-05
IL7R	-1.79541	0.0138475
PLCXD1	-1.79504	0.000272464
FFAR3	-1.79237	0.0366613
SPATA5	-1.79144	6.93082e-10
ERO1A	-1.78965	3.06674e-13
FGF12	-1.78821	0.00123471
SLC2A3	-1.76406	0.000946166
TFRC	-1.7536	0.0011497
GADD45G	-1.74865	0.00655635
THEM6	-1.73617	0.00487261
TLCD2	-1.73395	0.00515191
GJA9	-1.73329	0.0209047
ANKRD24	-1.72793	1.11652e-10
SHROOM4	-1.72669	4.25237e-05
SMAD7	-1.72636	2.05944e-05
CHST3	-1.72391	0.00701789
RAPH1	-1.72286	1.1589e-10
SRL	-1.71458	9.35535e-05
CCN1	-1.71408	0.021334
CAVIN4	-1.69972	0.00685222
ACTA2	-1.67844	0.0012325
HYOU1	-1.67606	4.52251e-07
BHLHE40	-1.66227	0.00145347
TRIB2	-1.65714	3.19392e-08
ABCC3	-1.65032	0.00016827
PTPRE	-1.64939	0.00026274
RAPGEF4	-1.64219	0.000288748
TRAF5	-1.63775	0.0145999
NLRP6	-1.63404	0.000378122
AGTR1	-1.63381	1.18889e-05
KCNG2	-1.62438	0.00525847
MANF	-1.62294	5.34672e-05
CSDC2	-1.61778	0.00351413
RGS16	-1.61253	0.0011079
ANKRD61	-1.59927	0.004409
ATP1B3	-1.59562	1.17866e-08
CYSLTR2	-1.59439	0.00655635
PCDH18	-1.59152	2.33077e-05
CPT1A	-1.58733	0.000141413
MDGA1	-1.57658	0.00557995
DISC1	-1.56557	0.000200582
WDR77	-1.56432	5.58003e-05
EMP1	-1.56123	0.000115304
KIF26B	-1.5518	0.0230166
ACTG2	-1.55173	0.0186761
KIAA1522	-1.54884	0.000383546
SHISAL1	-1.54876	0.00880987
PFKL	-1.54753	0.000133009
SLC7A5	-1.54735	0.000165556
SOX8	-1.54319	0.00348604
PTGDR2	-1.54279	1.4077e-06
RDH13	-1.53749	0.00140452
VEGFA	-1.5349	0.00472931
ARL8A	-1.52902	1.02138e-07
CPM	-1.52134	0.000667917
LIMD1	-1.52123	0.00219535
FGFR3	-1.51904	0.001681
ADRA2B	-1.51896	0.000230411
ATF3	-1.51674	0.0301578
SYT7	-1.5154	2.4e-05
FSD1L	-1.51476	4.9646e-07
EGLN3	-1.51066	0.00126373
AMOTL2	-1.50849	0.00113839
TAF4B	-1.50363	0.000166116
SLC12A4	-1.50337	5.62636e-11
ITGA2	-1.49791	0.00799016
FADS3	-1.49528	0.000153618
MARS2	-1.49471	0.00361492
CNMD	-1.49286	0.0153163
PPP1R14A	-1.48884	0.000248543
HS3ST2	-1.4882	0.0352012
SPTB	-1.48735	0.0181208
PDE4C	-1.48708	0.0141229
SLC35B4	-1.48661	0.000153202
DMKN	-1.48608	0.047005
SLC10A1	-1.48318	0.0285255
LDHA	-1.48042	0.00230484
GOT1	-1.47901	8.76783e-05
FAM107B	-1.47769	0.00116579
TP53TG5	-1.47198	0.0413403
A4GALT	-1.46969	0.000782003
PNP	-1.46633	0.00319555
SDK2	-1.4545	0.0145999
SLC18A2	-1.45097	0.0421961
CPXM2	-1.4482	0.00757257
AMHR2	-1.44796	0.00640369
SLC2A1	-1.44647	0.000228773
SGK1	-1.44477	0.000126984
SMAD9	-1.44187	0.00183021
ECM1	-1.44169	8.64726e-06
PPARD	-1.43905	0.000383546
ASPHD1	-1.4312	0.0392577
HSP90B1	-1.43041	0.00373431
RRS1	-1.42551	0.00069496
GJA1	-1.42526	0.00491887
CCND1	-1.42459	1.45406e-07
TMC8	-1.42212	0.0145089
CYSLTR1	-1.41325	0.013619
RASGRF2	-1.40241	4.25237e-05
GPR88	-1.39904	0.0308089
SERPINH1	-1.39637	0.0075109
FABP4	-1.39486	0.00290831
PSMA8	-1.38922	0.025879
SLC51B	-1.38751	0.0316453
SLC17A9	-1.38656	0.0145417
AK4	-1.38246	0.000667917
GIPR	-1.37489	0.00115949
ATP13A3	-1.36993	0.00322599
TMEFF1	-1.36819	0.0141229
KLF7	-1.36209	1.83074e-06
MICAL2	-1.34579	0.0329595
PNO1	-1.34557	2.85415e-06
XYLT1	-1.34539	0.0225854
GLTPD2	-1.34433	0.033775
TIMP4	-1.34419	0.00332594
BCL2L1	-1.33981	0.000709873
ENPEP	-1.33747	0.000939673
MRI1	-1.33636	4.5925e-05
HSPH1	-1.32909	0.00231833
NIP7	-1.32367	9.39696e-07
RTL5	-1.32335	0.000169248
DAAM2	-1.32156	0.00146295
NDUFAF4	-1.32067	0.00095679
ADAMTS12	-1.32001	8.86029e-05
ID1	-1.31743	0.000333018
GAR1	-1.31578	0.000346045
ZNF366	-1.31518	0.0209207
TFAP2E	-1.31414	0.0211843
CCDC86	-1.31237	0.000249882
SLC9A3R2	-1.30825	0.000462555
GNGT2	-1.30537	0.00811346
GAREM2	-1.30288	0.00692819
VCL	-1.30118	1.11805e-05
TPM2	-1.29915	0.000254107
EPOP	-1.29701	0.033847
KANK4	-1.29446	0.0410865
ETS1	-1.29379	0.00556424
TMEM50B	-1.29199	0.000913562
ARHGEF9	-1.2896	0.00307535
PABPC1L	-1.28891	0.0256324
KDR	-1.28786	1.30823e-07
TEAD4	-1.28761	0.00535719
P2RY2	-1.28641	0.0328858
ARL5A	-1.28568	0.00832921
FEZ1	-1.28466	0.00528556
MSX1	-1.2749	2.16754e-06
RRP12	-1.27455	0.000763017
LNPEP	-1.27169	0.0128019
CALR	-1.27106	0.000446439
TIMM8A	-1.2704	0.00280636
ABHD8	-1.26858	0.020387
UGGT1	-1.25967	0.00361492
NEDD4L	-1.25811	6.26686e-05
ENG	-1.25292	0.00320718
POLR3G	-1.25203	0.00135034
SUGP2	-1.24992	2.49983e-05
LENG8	-1.23381	0.00253709
UBASH3B	-1.23301	0.00169281
TAGLN	-1.23025	0.00573422
KCNAB3	-1.22779	0.021717
TIMP3	-1.22365	0.000317862
TSR1	-1.22236	0.000669874
ATP1A1	-1.22227	6.79514e-10
CITED4	-1.2217	0.00750601
CMIP	-1.22149	0.000166116
AMD1	-1.2202	9.1066e-05
SPRY1	-1.21625	0.00467009
PLXNA2	-1.21459	0.000119348
MCL1	-1.21377	0.000387802
ADORA2A	-1.21282	0.00511687
GRIK3	-1.21225	0.0174311
GIT1	-1.21199	2.17401e-05
RPIA	-1.21142	0.000952949
PLCL1	-1.20824	0.000143712
SPRED3	-1.20425	0.000913003
FGF13	-1.20371	0.0323519
NACAD	-1.20309	0.0228756
SAR1B	-1.20242	3.71526e-05
SLC35A3	-1.20022	0.00195808
WDR46	-1.1995	0.010943
HECW2	-1.19845	0.00474345
PMP22	-1.19759	0.0137295
ANXA3	-1.19732	5.25445e-05
SYTL2	-1.19724	0.0301602
RILP	-1.19684	0.005802
SRSF1	-1.19648	0.000177531
ZNF697	-1.19602	0.000263199
HAPLN3	-1.19215	0.000457263
ASS1	-1.18632	0.00678734
PDIA4	-1.18623	0.00122707
HIGD1A	-1.1846	0.000120505
CABP1	-1.1841	0.00551557
CCDC134	-1.18372	0.0183816
LAMC3	-1.18325	0.000791577
ABHD13	-1.18042	0.000314788
PKDCC	-1.17939	3.18441e-05
ALPL	-1.17818	0.00951108
MLEC	-1.17161	7.20185e-05
SDC4	-1.16771	0.036746
RPF2	-1.16715	0.00526891
ATP7B	-1.16635	0.0282165
DIPK2B	-1.16592	0.017017
SYNGAP1	-1.16571	0.00522917
ATXN2L	-1.16486	0.000214095
UGDH	-1.16204	0.0271297
DPH1	-1.16048	0.000233662
SNTA1	-1.15835	0.00085245
CLDND1	-1.15829	9.79662e-05
STYX	-1.15494	3.04011e-05
ENDOD1	-1.1537	0.00115949
PIGA	-1.15305	0.00594031
TMEM47	-1.14806	0.0254115
PRRT2	-1.14464	0.0141533
TMC6	-1.14462	0.0445011
BCDIN3D	-1.14251	0.00103293
EEF1E1	-1.14031	8.51893e-06
PPP1R15A	-1.13871	0.0255958
NUS1	-1.13719	3.10327e-07
THBD	-1.1346	0.0276908
LRFN4	-1.13315	0.00124233
MPV17L2	-1.13164	0.00283259
SPATA13	-1.1311	0.000543015
NSUN6	-1.13018	0.00026274
SRF	-1.12555	9.11695e-05
ITGA1	-1.12355	0.00781956
NT5C3B	-1.12177	0.00427996
NUP210L	-1.12143	0.000321525
GCH1	-1.1158	0.0042468
KCNK4	-1.11246	0.00493425
CLIC1	-1.1109	0.000775681
GADD45B	-1.11076	0.0356324
SPTY2D1OS	-1.10618	0.00385833
CPSF6	-1.10617	0.00344781
ATP5MC1	-1.1045	0.00581827
CCDC142	-1.10441	0.00582999
PSD3	-1.10381	0.00215366
SPRED1	-1.10171	0.00420377
TMEM88	-1.10026	0.0265844
ERLIN1	-1.10016	0.000277631
MMP16	-1.09855	0.00046896
LTV1	-1.09802	0.000886409
FICD	-1.09785	0.00389811
PLXNA1	-1.09641	5.64958e-06
MBNL3	-1.09587	0.0148494
CAMK1	-1.09542	0.000732035
CHSY1	-1.09253	0.00326536
MAP2	-1.09181	0.00727288
MDFI	-1.08894	0.029604
LSM11	-1.087	0.000263199
GMPPB	-1.08607	0.000127447
KDM7A	-1.08542	0.00612598
NOP14	-1.08532	0.0103153
B3GALT6	-1.08518	0.0155888
IFFO2	-1.08401	0.000433028
METTL1	-1.08236	0.0385055
WDR12	-1.08204	0.00416796
PODXL	-1.08202	0.00934313
MAP2K1	-1.07836	0.000126984
MYBBP1A	-1.07671	0.00421111
TM4SF1	-1.07593	0.00833429
GOSR2	-1.07394	0.000141063
PDE12	-1.07394	0.00493425
SDF2L1	-1.06956	0.0164115
BAG5	-1.06936	0.0015155
STK26	-1.0687	0.0244657
TBX3	-1.0684	0.0171896
DNAJB11	-1.06811	0.00162517
MIPOL1	-1.06687	0.0191795
TARDBP	-1.06326	0.0010121
FUBP1	-1.06317	0.000681546
CRY1	-1.06314	0.00987946
ADSS	-1.06109	0.00280113
SRSF2	-1.06063	0.000691203
SLC33A1	-1.05903	0.0115298
TIPARP	-1.05855	0.00927754
TIMM9	-1.05662	0.000862324
PRKD3	-1.05649	0.00132539
RGS5	-1.05618	0.0275095
VEZT	-1.05395	0.00022737
EHD3	-1.05389	0.00332594
ETV6	-1.05351	5.64958e-06
TMEM64	-1.05349	0.00622856
NAT10	-1.05167	0.013102
RNF149	-1.05163	0.00011206
KCNJ8	-1.05065	0.00505645
PUS7	-1.04496	0.0172758
PDIA6	-1.04491	0.00342133
ZNF654	-1.04336	0.00201815
CCDC38	-1.04272	0.0176339
PPP1R3D	-1.04247	0.000650797
ACTN1	-1.04218	0.00018463
MAK16	-1.04112	0.0001425
ENO1	-1.0369	0.0028946
LITAF	-1.03066	0.00209649
CAPN2	-1.03064	0.00124233
CD68	-1.03062	0.0134652
INTS2	-1.03013	0.0011206
B3GNTL1	-1.02754	0.00868557
MYO1C	-1.02734	5.88871e-05
BTBD19	-1.02606	0.0207956
COL4A2	-1.02524	2.09927e-05
PWWP2B	-1.02447	0.0305517
SEC14L1	-1.02447	0.00193354
MAT2A	-1.02279	0.000174551
LIMS2	-1.02211	0.00212592
AKIRIN1	-1.02201	0.00685222
TBX2	-1.02192	0.021717
DNAJA4	-1.02182	0.00215308
SPCS3	-1.02137	5.88871e-05
CSRP1	-1.02107	0.00141759
PTPRG	-1.02088	0.0198602
ZNF207	-1.01906	0.000671994
GRWD1	-1.01785	0.000814183
GRPEL1	-1.01723	0.0110606
DIS3	-1.01545	0.0424248
VASN	-1.01482	0.0215654
TMEM158	-1.01287	0.0499433
ZKSCAN8	-1.01051	0.00730513
ZFAND2A	-1.0105	0.026408
RSL1D1	-1.00858	0.000226404
FLNA	-1.00578	0.00845251
HSPB1	-1.00248	0.000534229
SLC38A1	-1.00226	0.0355448
PHACTR2	-1.00179	0.0213291
COL4A1	-1.00101	5.72946e-06
CCNYL1	-1.00084	0.00920949
PLK3	-1.00072	0.0199628
LPCAT3	-0.998916	0.0019225
PRDM2	-0.997848	0.000553936
FZD4	-0.994897	8.76783e-05
PWP2	-0.993072	0.00791731
CLIC4	-0.988594	0.00498144
UFM1	-0.988279	0.0109477
HGS	-0.986643	4.22792e-05
RRP8	-0.985402	0.0032143
TOMM40	-0.985401	0.0251505
RFESD	-0.985292	0.00271117
PIK3C2A	-0.984814	0.0244953
TMSB4X	-0.984109	0.000176319
YRDC	-0.9832	0.000692385
RRP15	-0.983155	0.00260568
IER2	-0.981781	0.00535719
CASP7	-0.980821	0.014657
FAM136A	-0.979972	0.00155342
ODF3	-0.979902	0.00271117
GIPC3	-0.979723	0.013622
ARMCX5	-0.979227	0.0171615
GSAP	-0.978065	0.0433109
NABP1	-0.976477	0.0264523
GNL3	-0.976439	0.0129889
CHCHD4	-0.97556	0.0235431
RNF152	-0.973783	0.00309054
FAM118A	-0.972961	0.0268811
RBM34	-0.972929	0.00577267
INO80E	-0.972797	0.00479663
AHCYL1	-0.970472	0.0276847
PPRC1	-0.970071	0.00201081
KLHL28	-0.969477	0.028093
KHDC4	-0.969406	0.0028946
CCT6A	-0.969394	0.00213056
SMYD5	-0.969109	0.0304607
NCOR2	-0.966465	0.00328416
DNAJC24	-0.966022	0.0253144
STK10	-0.964427	0.000166116
SENP5	-0.964259	0.00457274
PRELID3B	-0.962571	0.0239005
GLIS2	-0.96135	0.0101933
ERP44	-0.961152	0.000109564
PGM2	-0.960653	0.00397278
E2F4	-0.960499	0.00109232
AMIGO3	-0.960162	0.0331405
PLAU	-0.958889	0.0118393
RGL1	-0.957874	2.33548e-05
LRP8	-0.957793	0.0299617
VTI1A	-0.957729	0.0064021
PIGW	-0.957685	0.00156902
ERGIC1	-0.956855	0.00195369
SHB	-0.956347	0.00214264
HPCAL1	-0.956113	0.000502835
RASSF3	-0.955361	0.00661649
AKAP2	-0.954546	0.00219371
RASGEF1A	-0.953812	0.0256383
NUFIP2	-0.952158	0.000905495
VWF	-0.951987	0.00300806
TMEM33	-0.950231	0.00532305
NOP16	-0.94954	0.000957577
ARHGAP24	-0.947873	0.00867452
EDEM1	-0.94698	0.00233764
DLC1	-0.946377	0.000681855
TNFAIP1	-0.946124	0.000518419
ADAM15	-0.946112	0.00352362
STK38L	-0.945856	0.00419043
AMMECR1	-0.945597	0.00449194
PDIA3	-0.944641	0.0100071
NIFK	-0.943915	0.002884
SLC29A1	-0.943179	0.00619226
TRAM2	-0.942871	0.000913562
DNAJB14	-0.942161	0.0184024
SCAF1	-0.940952	0.00110999
SCARF2	-0.940625	0.0404996
PRPF3	-0.940406	0.000393943
POLR3E	-0.939541	0.00159198
DYSF	-0.939358	0.00447404
PDGFRB	-0.93889	0.00262833
WWC2	-0.938635	0.000775207
CD59	-0.938482	0.0160508
DHRS11	-0.938221	0.000282364
ASAP1	-0.936345	0.00115985
XBP1	-0.933457	0.0231928
FRMD4A	-0.932041	0.006762
IDH3A	-0.93119	0.0192188
CALU	-0.931083	0.00470064
SMAD6	-0.931002	0.0274351
HMGCS1	-0.930712	0.000499782
BOP1	-0.928948	0.00265655
RNF24	-0.927957	0.045611
HNRNPA3	-0.92624	0.00502994
NACC1	-0.924795	0.0081969
SYNPO	-0.923904	0.0174014
RIC8B	-0.923119	0.00786838
SRCIN1	-0.922761	0.0242948
SLC30A4	-0.921955	0.00373003
NFATC4	-0.921251	0.00184283
TMEM41A	-0.920642	0.0230721
ZBTB46	-0.920621	0.028594
JMJD6	-0.920194	0.005802
PTPN23	-0.918969	0.045732
ACTN4	-0.91763	0.000249882
SLC9A1	-0.915571	0.00356516
L1CAM	-0.915177	0.0285956
PCYT2	-0.915062	0.00799015
DDX5	-0.915018	0.00931344
PAWR	-0.913137	0.00622914
RBM33	-0.912208	0.000990867
PPM1F	-0.911844	0.0130612
LMNB2	-0.911294	0.0481197
ADAMTS15	-0.911243	0.025879
TOMM5	-0.909963	0.00147465
ATXN1	-0.908231	0.00319586
RPS6KA3	-0.907909	0.032987
SRPRB	-0.907307	0.00328707
DAB2IP	-0.906238	3.69171e-05
STIP1	-0.905523	0.00378391
HIPK3	-0.905244	0.00342218
ZNF12	-0.903964	0.00307018
LRRC8C	-0.903055	0.0388138
STARD8	-0.903005	0.0238478
IFRD2	-0.90268	0.00514581
TUBB4B	-0.902311	0.0113886
PGAM1	-0.902127	0.0189868
PTBP1	-0.901547	0.00791898
MGAT4A	-0.89957	0.000369975
ATP11A	-0.898721	0.0142268
ATXN7	-0.8977	0.00960391
IMMP1L	-0.897275	0.0205824
REXO2	-0.897	0.0219815
CHORDC1	-0.896537	0.0115254
CRYBA1	-0.896218	0.00265906
CA2	-0.895775	0.0414031
GOLT1B	-0.895037	0.0305517
IMPG2	-0.894538	0.0238478
CS	-0.893281	0.0278253
SOGA1	-0.893199	0.00435097
PIGC	-0.891462	9.3609e-05
USP10	-0.890886	8.09248e-05
EIF4A1	-0.890561	0.00310952
MOSPD2	-0.889776	0.0107663
NOL6	-0.888335	0.0112824
EPN2	-0.887192	0.00373003
CRIP2	-0.887124	0.0082965
HMGN4	-0.886829	0.0133937
EMC4	-0.88676	0.00698253
ARHGEF17	-0.886053	0.024673
CARNMT1	-0.885914	0.000692647
DPP9	-0.885399	0.00622851
FAM126B	-0.88539	0.0077342
HDAC7	-0.885235	0.0276254
UFSP2	-0.885141	0.0251327
GPRC5B	-0.884166	0.0222464
MARVELD1	-0.883252	0.0185562
LSM12	-0.882597	0.00300538
CANX	-0.882032	0.00041991
ST7	-0.881785	0.0228756
RCAN1	-0.88107	0.0251692
GNPNAT1	-0.879373	0.0320585
RDH11	-0.878879	0.0176643
DPH3	-0.878594	0.00300538
PDE10A	-0.878516	0.0471042
LIN7C	-0.876594	0.0225564
GTF2H3	-0.875834	0.000944999
UHMK1	-0.875732	0.0032143
IMP4	-0.87511	0.0192676
TMEM204	-0.873783	0.0242474
TTC31	-0.872087	0.0113467
SLC5A3	-0.870438	0.0128531
TWIST1	-0.869581	0.0419912
CBL	-0.867321	0.000399902
STT3A	-0.866774	0.00378391
ARMCX1	-0.866576	0.0146747
LMTK2	-0.865489	0.0278253
CHST1	-0.865315	0.00791019
STOM	-0.864289	0.0307228
ITGB1	-0.863952	0.00501706
NOP9	-0.861487	0.00439021
GCLM	-0.858286	0.00875048
CREBZF	-0.858279	0.00505645
TMSB10	-0.857659	0.00376833
WDR36	-0.855629	0.00766761
AKIP1	-0.855383	0.0301602
TAGLN2	-0.854274	0.028594
ABI3	-0.852904	0.00757257
PGK1	-0.852506	0.016833
SNRPF	-0.851759	0.0173175
FTSJ1	-0.851659	0.0391492
SNRPA	-0.851527	0.00173117
EGLN1	-0.850973	0.00958474
UBE2V2	-0.850071	0.000249882
MYH9	-0.848608	6.7578e-05
SLC16A1	-0.847281	0.036892
CAPN15	-0.846886	0.0496756
MESD	-0.845921	2.44415e-05
LRRC59	-0.844946	0.0262051
PKD1L3	-0.844766	0.0237121
ALG5	-0.843852	0.00153199
HK1	-0.843275	0.00125358
MPI	-0.842722	0.0181894
CIAPIN1	-0.842435	0.00205161
TIMM17A	-0.841863	0.0022034
CLN5	-0.8416	0.0107127
DET1	-0.841478	0.00310952
PIM2	-0.83993	0.0465903
PHF6	-0.839401	0.00839745
NANP	-0.838095	0.00300538
KATNBL1	-0.837504	0.0125937
SLC25A24	-0.83628	0.00487261
UMPS	-0.836151	0.00515191
TMEM126A	-0.834751	0.00511847
RHOBTB2	-0.834135	0.0252762
SLC26A2	-0.833472	0.0262051
KLHL11	-0.833338	0.0164588
HSP90AA1	-0.832565	0.024075
MRS2	-0.831275	0.0163999
GSPT1	-0.831115	8.98536e-05
MARCKS	-0.830665	0.0230732
SRXN1	-0.830631	0.00154506
SNRPD1	-0.830252	0.0145089
INTS1	-0.829049	0.0182038
NEDD4	-0.828601	0.0145476
LARP4	-0.828066	0.00573965
PKP4	-0.827378	0.0386756
CCDC117	-0.827302	0.006762
SEMA4C	-0.827299	0.0174014
SRSF5	-0.826685	0.0428174
MAP3K7	-0.825202	0.00086022
CCDC58	-0.824606	0.0243514
WRAP53	-0.82435	0.000378122
ZBTB9	-0.824123	0.0155409
HSPA13	-0.82393	0.0109236
TCFL5	-0.823666	0.0106546
ARHGEF11	-0.822191	0.00238897
RFK	-0.821793	0.0207956
PFAS	-0.821683	0.014657
TMBIM1	-0.820948	0.000669874
PISD	-0.820493	0.045209
ADCK5	-0.818184	0.0497752
NPFF	-0.81782	0.0189042
UEVLD	-0.817448	0.0172034
MIB1	-0.81686	0.0269028
HSPBP1	-0.815023	0.000996349
RNF121	-0.81454	0.00420327
HSPA4	-0.814161	0.0019975
DENR	-0.813845	0.0230166
ARHGAP42	-0.811793	0.025879
SNAI2	-0.811736	0.0336744
ENDOV	-0.810707	0.00782444
CERS2	-0.810308	0.000433028
IMPAD1	-0.809285	0.000446439
CLEC3B	-0.809217	0.00565424
TIMM50	-0.809195	0.0225403
RFTN1	-0.806476	0.0256189
AP4E1	-0.805002	0.0271749
SH2B3	-0.80458	0.00198837
CDC42EP4	-0.803052	0.00026274
TXNRD1	-0.802356	0.000754324
KIF16B	-0.801904	0.00290831
WNK1	-0.801647	0.00107065
NUP93	-0.799094	0.0125103
PTGES3	-0.796309	0.00300538
EVA1B	-0.795345	6.76884e-05
MRTO4	-0.795105	0.0112824
ZNF445	-0.794771	0.00565424
CMTM6	-0.793799	0.028108
SOCS4	-0.793643	0.0238478
MMGT1	-0.793528	0.00259639
HEYL	-0.793001	0.00928211
MRPL20	-0.792469	0.000394073
G3BP1	-0.791943	0.00147465
SMG5	-0.790219	0.0290639
GTF3C6	-0.789825	0.0204841
TMED5	-0.789326	0.0387278
RNGTT	-0.788956	0.00871676
BUB3	-0.788813	0.00892936
PPP1R37	-0.787046	0.00147305
CDK2AP2	-0.787021	0.00788208
PSMD14	-0.785991	0.00525998
TCF7L1	-0.785591	0.00765695
LLPH	-0.784217	0.00480096
NUDCD1	-0.783198	0.0212181
ANKRD52	-0.780415	0.00382747
ABCF2	-0.780173	0.00346526
SELENOT	-0.779875	0.0165978
MITD1	-0.779841	0.0212846
TNKS2	-0.777681	0.0455191
CCNH	-0.775805	0.0203829
PRDX1	-0.774236	0.00499751
VAMP2	-0.772217	0.012068
TIMM13	-0.77161	0.00453006
ATAT1	-0.771328	0.0155883
PRMT1	-0.770844	0.000706016
CHST7	-0.770707	0.0323994
FTSJ3	-0.770366	0.0222464
ARID3B	-0.770236	0.0380766
YBX3	-0.769515	0.00512499
CPSF1	-0.768338	0.00493425
FBL	-0.768111	0.000992926
PIGX	-0.767357	0.048063
SELENOH	-0.766183	0.0160508
RAB10	-0.765899	0.00800625
FXYD5	-0.765435	0.0181468
ABCB9	-0.764539	0.0392577
ROBO4	-0.763701	0.018503
NR2C2AP	-0.76352	0.0126936
GDI1	-0.760146	0.00936232
SNRNP40	-0.758993	0.011363
RTCA	-0.757795	0.0206137
JMJD8	-0.757414	0.0200906
RNF7	-0.756812	0.0119052
SLC35B1	-0.756656	0.0141232
UBE2N	-0.755467	0.0199263
DDX56	-0.754816	0.0455191
ATF4	-0.753976	0.00244684
TRMT61B	-0.753839	0.0332945
TMED10	-0.752702	0.0160678
LCORL	-0.752601	0.0161852
CSTF3	-0.750673	0.00844643
VASP	-0.750465	0.00845251
AKAP10	-0.747719	0.00379431
PLPP3	-0.747616	0.00223187
PSMA5	-0.747464	0.000944999
BYSL	-0.746205	0.0128035
AEN	-0.74539	0.0433721
NHP2	-0.744987	0.00175111
AGPS	-0.744744	0.0029317
CARD19	-0.74426	0.00454394
TCF20	-0.744207	0.00329967
EMC8	-0.744088	0.00557995
PHC2	-0.744041	0.0033722
PPIL1	-0.743513	0.039427
IFNAR1	-0.743486	0.0462609
TIMM10B	-0.743106	0.00848802
TAB3	-0.743042	0.025879
PSMD11	-0.742806	0.000462555
PSMD12	-0.742394	0.00391316
TRIM3	-0.74174	0.0139156
KANK2	-0.741538	0.0181468
VARS	-0.736745	0.0228657
AP5M1	-0.736182	0.0369925
PSMD3	-0.735993	0.00219191
ARPC5L	-0.735781	0.000645892
STK35	-0.73524	0.0164274
MAP3K2	-0.735193	0.0219837
YARS	-0.734853	0.000193138
PLEKHA1	-0.733879	0.0253258
TAF13	-0.733498	0.0174735
GSK3A	-0.733083	0.00420377
PLK1	-0.732529	0.0323175
BAX	-0.73116	0.0393269
EIF2S1	-0.731127	0.00760972
RUVBL2	-0.731013	0.0162976
ZNF768	-0.730878	0.00113839
RBMX	-0.730241	0.0299617
SINHCAF	-0.729501	0.0289126
RASGRP2	-0.728267	0.0126696
HGH1	-0.727841	0.0116274
CAP1	-0.727312	0.0109268
CCDC106	-0.727264	0.0479637
STAT3	-0.727255	0.0412412
PSMC4	-0.726469	0.00440558
RBM12B	-0.726173	0.0249566
DNAJC25	-0.724806	0.0179578
EXOC6B	-0.72028	0.00191643
OSGEPL1	-0.719998	0.0148664
ARMC1	-0.719444	0.00794549
CCT5	-0.719191	0.00205865
RAD51C	-0.718455	0.0397988
TMEM135	-0.717961	0.0126936
PABPC4L	-0.717701	0.0492103
CAVIN3	-0.717133	0.00928211
HNRNPAB	-0.716954	0.00681426
RNF14	-0.715782	0.0237544
MRPL15	-0.71289	0.00346329
PIP4P2	-0.712863	0.0452109
ZDHHC9	-0.712644	0.0332945
USP5	-0.71251	0.00283259
GEMIN5	-0.712227	0.00413293
SNRPB	-0.712133	0.00961018
TIPRL	-0.711918	0.0163392
PDCD11	-0.71163	0.00325684
METTL3	-0.711299	0.0331405
SOCS6	-0.71118	0.00832921
ARHGDIA	-0.709296	0.00391316
FARSB	-0.709227	0.00951108
MTCH1	-0.708539	0.00350091
ABCE1	-0.708194	0.00320718
ATF6	-0.707947	0.0182137
EAF1	-0.706693	0.00752206
MOB1B	-0.706459	0.0453204
RC3H2	-0.705454	0.0478138
WDR43	-0.704778	0.0195357
DOT1L	-0.704347	0.0301578
MAVS	-0.704212	0.013102
SNX19	-0.703079	0.00300538
SCOC	-0.702918	0.0445123
KMT2D	-0.702886	0.0110319
SLC39A7	-0.702359	0.0173316
SCAF4	-0.701107	0.00326161
DUSP7	-0.700326	0.00884334
PRR13	-0.699677	0.00359765
ZPR1	-0.698153	0.00179167
TMEM30A	-0.697475	0.0244275
POLR2D	-0.696686	0.00870103
PDCD5	-0.696433	0.00310952
GLMN	-0.696173	0.0398478
PA2G4	-0.696038	0.00576953
ATP2B4	-0.695946	0.046928
RNFT1	-0.695874	0.0296794
DRAP1	-0.695406	0.00413811
TAF9	-0.695267	0.028736
GTPBP8	-0.694711	0.0299111
SNX33	-0.693563	0.0280681
CNOT9	-0.692887	0.00389663
CDC42BPB	-0.692202	0.0199263
CLCC1	-0.691787	0.00349514
ZNF518B	-0.690624	0.0203105
SYNCRIP	-0.690556	0.00300772
RPRD1A	-0.690526	0.0426743
PFDN6	-0.689791	0.0104849
ARHGAP29	-0.688704	0.0270906
EEF1AKMT1	-0.687371	0.0029493
SEH1L	-0.685782	0.00928211
STT3B	-0.685697	0.0123303
TIMMDC1	-0.683376	0.0409055
NAA40	-0.682782	0.0446169
ZNF473	-0.68151	0.0300355
DGUOK	-0.681268	0.0326525
DUS3L	-0.680476	0.0149362
PDSS1	-0.680379	0.0145253
UTP4	-0.678817	0.0285255
STK24	-0.678282	0.00219371
PTPA	-0.67801	0.00692587
MED22	-0.6775	0.0126936
SEC16A	-0.67707	0.0308089
RPRD1B	-0.676893	0.0410444
SEC63	-0.676797	0.00513131
SNAPC3	-0.676501	0.00732757
SFXN3	-0.676236	0.0343983
ACTR1A	-0.675914	0.0121214
PAF1	-0.675796	0.0303701
RANBP1	-0.675451	0.00427996
KPNA4	-0.673232	0.00233184
TMEM167B	-0.672769	0.0186095
CHERP	-0.672739	0.0155227
PPP1CC	-0.672671	0.00928211
LEPROTL1	-0.670357	0.0426852
DIAPH1	-0.670291	0.0310097
GATAD2A	-0.670053	0.00685222
AASDHPPT	-0.669362	0.0112849
HRAS	-0.669022	0.00525173
ACTB	-0.668414	0.0189893
KHSRP	-0.667759	0.00727412
MINDY2	-0.66774	0.0151539
NMD3	-0.667517	0.00407133
NAA50	-0.667406	0.00645695
CACYBP	-0.666989	0.0164503
HSPA12B	-0.666853	0.0478257
TM9SF3	-0.666152	0.0420607
LMAN1	-0.664712	0.0251538
PDRG1	-0.661997	0.0368351
EIF2B1	-0.661161	0.0226386
EXOC5	-0.656704	0.0122518
SRSF3	-0.654951	0.00791898
PSME3	-0.6544	0.0075109
NAA20	-0.654371	0.0251538
ZNF800	-0.653873	0.0192538
AHDC1	-0.652325	0.0269459
SPTY2D1	-0.651386	0.028594
USP30	-0.651079	0.0308089
TPM3	-0.650166	0.0165456
EIF4E	-0.65005	0.0465903
RHOT1	-0.648796	0.0148664
CALM1	-0.648001	0.0016695
SLC35A2	-0.647205	0.0232132
GPALPP1	-0.646911	0.0253912
SNRPC	-0.646702	0.00377956
DHX33	-0.646228	0.0305517
TMEM181	-0.646037	0.033775
POLR2E	-0.645684	0.00464602
UBXN7	-0.645445	0.0353693
SNRPA1	-0.643922	0.00271353
LAMA5	-0.643395	0.0407222
SEPHS2	-0.64332	0.0218676
NID1	-0.643066	0.0439528
KIAA1671	-0.6428	0.00194255
ETF1	-0.642793	0.0102201
BCCIP	-0.642502	0.00788685
AEBP2	-0.642015	0.0417098
NCLN	-0.641281	0.0387093
KLHL36	-0.641007	0.0269028
SF3A2	-0.640994	0.025879
LATS2	-0.640054	0.0475622
MTERF3	-0.639199	0.0126936
ITPRIPL2	-0.639141	0.0197295
HIKESHI	-0.638856	0.00868506
MIDN	-0.635247	0.0140137
FLI1	-0.635202	0.0280435
CDC26	-0.635089	0.0263428
PFDN2	-0.634937	0.040765
STRIP1	-0.634934	0.00678734
SELENOK	-0.634555	0.0271264
SNRPD3	-0.634117	0.00158135
WRNIP1	-0.633388	0.0323994
RHBDF1	-0.631843	0.0471243
U2AF1	-0.631509	0.00167481
LRRC8A	-0.62962	0.0114061
FAM219A	-0.629332	0.0397988
TIGAR	-0.627929	0.0485327
EXOSC8	-0.627742	0.0453951
ZFAND2B	-0.625801	0.0431266
ZNF316	-0.625436	0.0102805
PLOD1	-0.624527	0.0192765
ERH	-0.623787	0.0262051
ARPC2	-0.62268	0.0192188
EIF4G1	-0.621795	0.0331405
PRPF4B	-0.620798	0.0495311
DNM1L	-0.620484	0.0371371
ATP11B	-0.619302	0.0424345
PDZD8	-0.618122	0.0273908
RASSF1	-0.616955	0.0168989
AP1S1	-0.615306	0.0271749
HNRNPA2B1	-0.61445	0.0352616
DNAJC3	-0.614096	0.0305178
EPM2AIP1	-0.613941	0.0326525
ERN1	-0.613863	0.0293379
TRMT112	-0.613053	0.0320861
UBE2D2	-0.612033	0.0130569
MAPRE1	-0.61117	0.00573422
PITPNB	-0.610482	0.016635
TOMM20	-0.607891	0.0149362
NOB1	-0.607116	0.0283149
FKBP4	-0.606465	0.029697
DIDO1	-0.606252	0.0190158
MOGS	-0.60611	0.0255822
STRN4	-0.606011	0.0398911
RWDD4	-0.604761	0.0138381
UTP6	-0.603954	0.048063
PURB	-0.603584	0.0179476
UBE4A	-0.603335	0.045615
CANT1	-0.602791	0.0136348
TXNDC12	-0.600913	0.0367261
SPTSSA	-0.600381	0.0422105
CMPK1	-0.60028	0.0162393
IQGAP1	-0.599457	0.040765
CDK17	-0.597931	0.041873
TMED1	-0.596845	0.0450035
MFSD12	-0.591269	0.0387644
PRPS1	-0.591062	0.0153163
PRAF2	-0.590493	0.025879
CDC73	-0.588314	0.0124092
TRIR	-0.587912	0.0157974
TMEM131	-0.587588	0.0361333
SMC5	-0.587366	0.0474648
TGOLN2	-0.586761	0.0383517
DHX9	-0.58623	0.0457486
COQ10B	-0.586081	0.029604
TFE3	-0.583386	0.0138157
CNEP1R1	-0.583038	0.0475622
SAMD4B	-0.582257	0.0449062
UBA5	-0.581132	0.0472935
RER1	-0.580777	0.0209047
ISG20L2	-0.579212	0.0414967
ELK1	-0.578014	0.0189868
RALGAPB	-0.577534	0.0346721
SET	-0.5762	0.0121768
KIAA2013	-0.576136	0.046391
C1GALT1C1	-0.576071	0.0400095
KPNA6	-0.575902	0.0359239
DESI2	-0.574208	0.0333966
HIF1AN	-0.573104	0.0357899
NCOA3	-0.572111	0.0412412
TRIO	-0.570352	0.0446169
TLN1	-0.568802	0.0419734
CAMTA2	-0.568253	0.0310097
SF3B6	-0.568095	0.0486283
YTHDF1	-0.567109	0.0345923
PCNP	-0.565806	0.0272726
RHOB	-0.565657	0.0345923
TMF1	-0.563647	0.0242755
SERINC4	-0.563194	0.0321717
TRAPPC4	-0.562884	0.00952784
PBX2	-0.562644	0.0113886
CCNY	-0.562113	0.0407227
DIS3L2	-0.561902	0.0203992
RAMAC	-0.560297	0.0255958
KPNA1	-0.559819	0.0438892
RAD23A	-0.556309	0.00411684
PRELID1	-0.555578	0.0100989
TMED9	-0.555509	0.0150887
RTCB	-0.555194	0.0299617
RBM42	-0.554292	0.0102749
TRAK2	-0.553685	0.047683
URM1	-0.553109	0.0163385
ST3GAL1	-0.552754	0.0376553
EXT1	-0.552041	0.0414853
FOXK2	-0.550844	0.0188279
CYTH3	-0.550155	0.0111109
RIOK2	-0.550131	0.0225854

## Sheet: TH cold UP
Gene	log2FoldChange	FDR
CYP1A1	8.98142	3.62993e-12
GLYAT	6.33156	0.00246232
CXCL10	6.09731	2.06844e-05
IFI6	5.08144	3.76023e-15
MX1	4.93286	8.01904e-05
ISG15	4.824	8.58713e-05
PCLAF	4.62209	0.00253591
FOXM1	4.60856	0.00196495
AURKB	4.47992	0.000149469
IFIT1	4.34414	1.84218e-06
HERC6	4.01906	0.00247009
C3AR1	3.99277	1.20336e-06
FCGR3A	3.90961	2.8716e-09
ECT2L	3.85687	0.0152414
PCK1	3.85036	0.0106922
CEP55	3.66095	0.000847976
RTP4	3.36059	0.000192185
CD22	3.35857	0.0048429
KIF4A	3.2565	0.00382829
C2	3.22934	4.76659e-05
ASPM	3.22526	0.00522666
C1QC	3.17731	8.49801e-11
EPSTI1	3.13922	1.77557e-05
CDCA8	3.01551	0.020644
MKI67	3.00552	0.000443074
CDCA5	2.98815	0.0183671
C1QA	2.97618	5.3895e-10
ZBP1	2.91656	0.00193007
SCN7A	2.89914	0.00646981
COL1A2	2.87849	0.00455119
KIF18B	2.86361	0.00886719
VTCN1	2.8579	0.013695
CD2	2.84129	0.000621856
LY86	2.81314	0.00111839
ABCC8	2.78951	0.0211462
DPEP3	2.78606	0.000638237
MS4A7	2.77932	0.00628975
IQGAP3	2.772	0.0150232
DDX58	2.76648	0.00125007
NAIP	2.75564	0.00383436
EDN3	2.73332	0.00462859
PLAC8	2.71524	0.0227448
COL1A1	2.70477	0.00624088
PLBD1	2.65455	3.5561e-07
SHISA3	2.64577	0.0283572
RTKN2	2.63353	0.0096621
TROAP	2.6248	0.0132554
CD74	2.61909	0.000116552
NDC80	2.60812	0.00607876
IFI44	2.5375	0.000597104
RSAD2	2.52855	0.0144963
CD55	2.48868	0.000162438
SLC11A1	2.47381	0.0161869
XAF1	2.45144	0.00273798
SERPINF1	2.44662	0.00162439
CENPA	2.4138	0.00591671
C1QL3	2.4137	0.0370291
IFI44L	2.40298	0.000259174
GPBAR1	2.39535	0.0023687
CENPE	2.37737	0.0231957
RNASE6	2.36983	1.25822e-06
VSIG4	2.35336	0.00548282
BUB1	2.34095	0.000713635
SFRP4	2.32704	0.00170059
PDCD1LG2	2.32593	0.00773791
CPZ	2.31995	0.000547816
UBE2C	2.31544	0.00594915
C1S	2.3042	1.7579e-12
TOP2A	2.2755	0.00149654
FGD2	2.2697	1.61404e-05
WDR64	2.26219	0.00559376
IFIT3	2.25846	0.0357544
COL23A1	2.25597	2.77022e-07
FNDC9	2.24688	0.0338301
CD180	2.24078	0.00731256
COL3A1	2.22538	0.00162342
FBXO47	2.21618	0.0355429
NDNF	2.21503	0.0406862
CENPF	2.21301	0.015824
SLAMF7	2.21228	0.0301304
XCR1	2.21038	0.0091103
SLC37A2	2.20669	0.000137592
CCDC190	2.18645	0.00381409
SIGLEC11	2.18108	0.0108444
LUM	2.17427	0.00384259
DHX58	2.15828	0.00360724
FAM83E	2.12919	0.0213431
CD84	2.11707	0.015876
FMOD	2.11161	0.000697124
MPEG1	2.11008	3.40801e-06
TMEM108	2.08301	0.0406885
DPEP2	2.0767	0.00270052
MXRA5	2.06035	0.0213297
RBP4	2.052	0.00655944
MILR1	2.05064	0.00145299
G0S2	2.03221	0.0103941
ANGPTL1	2.03076	0.000160484
NPAS1	2.03003	0.0342117
MMP9	1.99917	0.0398435
CNTNAP2	1.98693	0.0313291
DKK2	1.97915	0.0369412
KIF15	1.97109	0.0151884
LPXN	1.96367	0.000100168
CIITA	1.90198	0.0015253
AK5	1.88751	0.00049316
NDST3	1.87214	0.0207455
PDGFRL	1.86726	0.0122745
CDC20	1.86309	0.0397388
TAFA3	1.84945	0.0103422
PLXDC1	1.84345	0.0218307
LAIR1	1.84245	0.000841267
AIF1	1.84014	6.38232e-07
UROC1	1.82892	1.86038e-06
EFCAB5	1.81595	0.00442123
POLE	1.80829	0.000645298
FAT3	1.8027	0.00519967
C1R	1.79975	4.5472e-05
RNF213	1.78977	0.00432687
KNTC1	1.78178	0.0035302
ABCA6	1.7784	0.000524155
RGS18	1.73593	0.0201842
CD200R1	1.72393	0.0307361
NCKAP1L	1.72209	0.00747982
NLRP3	1.71064	0.0462507
PAQR5	1.71028	0.00113259
PILRA	1.70453	0.0292167
SIGLEC1	1.70114	0.000648471
SAPCD1	1.68731	0.0482735
AZIN2	1.6818	0.0194502
SRGAP3	1.68035	0.0137568
TNFAIP8L2	1.68011	0.00119748
NFAM1	1.68009	0.00283828
ROBO2	1.67867	0.00170099
TPSB2	1.67221	0.022423
ASB9	1.6709	0.0302574
DCN	1.66911	0.00141534
PLD4	1.66604	0.00130122
CIT	1.66439	0.0098095
ARL14EPL	1.66299	0.0324094
YPEL1	1.66009	2.34497e-07
ZGRF1	1.66005	5.24123e-05
LIPC	1.65997	0.0414598
SELENBP1	1.65105	0.00191688
NLRP1	1.63789	0.00608577
HNMT	1.63285	0.0120612
TNFSF10	1.63175	0.0135636
MAP2K6	1.62845	0.0144531
ACKR4	1.62746	0.0286321
PRELP	1.612	5.8381e-06
KIFC1	1.61084	0.00351353
DLGAP1	1.60352	0.0181006
IQCN	1.59715	0.0239525
FOLR2	1.59189	0.00239644
MDK	1.59003	9.09165e-05
ARHGAP15	1.56919	0.0177418
CCDC102B	1.5655	0.0452743
TSPAN11	1.55735	0.00232519
SLC9A9	1.55398	0.00716882
MYOC	1.5456	0.000241403
CKAP2L	1.53936	0.0256238
CLSTN3	1.53565	0.0443814
ARHGAP33	1.53022	0.0215911
ZNF365	1.52685	0.0481805
SCIN	1.52676	0.0299627
MXD3	1.51123	0.0154693
FAP	1.50897	0.0268878
PTGR1	1.50837	0.000813814
EVI2B	1.50497	0.00988302
TPPP2	1.49791	0.00144437
CLEC7A	1.49678	0.0315217
ZNF544	1.49363	0.0455471
SLITRK6	1.49266	0.0242775
BAALC	1.49263	0.0262674
COL16A1	1.4847	0.00155392
CCR5	1.47705	0.0192477
ITPKA	1.47477	0.00907079
SELPLG	1.47406	0.0171528
NNMT	1.46725	0.0445552
PIGR	1.46505	0.0160753
ATP8B3	1.46457	0.00651602
GHSR	1.4641	0.0204
F13A1	1.46337	0.0258133
CORO2A	1.46045	0.0055192
ALOX5AP	1.45619	0.0480714
EPB41L5	1.45031	0.00066238
CD53	1.44717	0.0344901
SPI1	1.44195	0.00141533
ZMAT1	1.43486	0.00078902
FCGR1A	1.43196	0.01447
ANGPT4	1.43177	0.0006105
NTRK2	1.43127	0.0232344
LRRC25	1.43053	0.0273275
CD86	1.42996	0.0348726
RTN4RL1	1.42811	0.00156195
C5AR2	1.4208	0.026447
UBA7	1.41838	0.0267691
RAB3B	1.41803	0.00078902
KIF20A	1.41482	0.0275221
ADAM23	1.41479	0.0244766
XPNPEP2	1.41389	2.08294e-06
CSF1R	1.41092	4.50908e-05
SLAMF8	1.41055	0.024563
MFAP4	1.40249	0.00628911
PDGFRA	1.40169	0.0305223
WNK4	1.40147	0.0051287
PARVG	1.39832	0.0146162
C5AR1	1.39783	0.00049316
ADA2	1.39604	0.0396598
TYROBP	1.38744	0.000958419
RANBP3L	1.3864	0.0441919
LAT2	1.38309	0.0044777
ALDH1L2	1.37891	0.0392368
SIT1	1.3707	0.00600543
GLT8D2	1.36969	0.0139861
PRTFDC1	1.36785	0.000777214
CFAP70	1.34451	0.010867
COL24A1	1.34299	0.0469647
CCL21	1.33038	0.0242775
IGSF6	1.32921	0.0153612
LRRC31	1.32064	0.0170034
NGFR	1.31878	0.0254685
HPGD	1.3179	0.0367275
IRF9	1.31613	0.0276732
SLITRK5	1.31612	0.0186314
RGS10	1.31566	0.00397623
WAS	1.31255	0.0240433
PPFIA3	1.31225	0.026661
COL4A6	1.30895	0.000664728
PITPNM3	1.3081	0.035528
BANK1	1.30696	0.0232064
NAPSA	1.3022	0.000554364
P2RY13	1.29192	0.00821208
ITGB2	1.28305	0.0353045
IGSF10	1.28184	0.00871222
PPM1K	1.28115	0.0397219
IGF1	1.27911	0.00640097
C7	1.27632	0.00627351
EML6	1.27597	0.0301341
DDAH2	1.27281	4.86871e-07
LST1	1.2667	0.0427086
NCF4	1.26238	0.0451325
MXRA8	1.2534	2.97477e-05
HERC5	1.25014	0.0392662
RIBC1	1.24401	0.0368425
CNTN1	1.2244	0.0421615
PLP1	1.22438	0.0212715
DBP	1.22336	0.00276349
SRPX	1.22167	0.0178865
BTK	1.21787	0.0211139
CCDC80	1.21081	0.019602
HCST	1.2041	0.0321177
GEN1	1.19786	5.98279e-05
ARHGAP30	1.19623	0.00121451
ORC1	1.19482	0.0345266
LOXL3	1.18633	0.00853039
GHDC	1.18036	0.0342497
CX3CR1	1.17782	0.0259893
JAML	1.17714	2.64747e-06
TCN1	1.15657	0.0419867
VSIG10	1.15129	0.0194571
CRISPLD2	1.15048	0.0387215
NLRC4	1.14988	0.0116207
IGFBP6	1.1487	0.026661
ABI3BP	1.14672	0.0473702
OAZ3	1.14395	0.0224395
RNF150	1.14327	0.000511769
ADAM33	1.14149	0.0165937
LCP2	1.14082	0.0316112
CCDC15	1.13893	9.15105e-06
MYCBPAP	1.13591	0.0027697
GPR34	1.12924	0.0212713
DDX4	1.12743	0.0117055
KISS1R	1.12404	0.0209651
AGER	1.12344	0.00731796
FRMPD1	1.11546	0.0278078
AGRN	1.11117	0.000100324
CLEC4A	1.10432	0.0333568
NAAA	1.1043	0.000868933
ERI2	1.1014	0.0295631
EFS	1.09803	0.0311949
FCER1G	1.09542	0.00210569
MAD2L1	1.0928	0.0259515
LRRC4	1.09153	0.0390242
EIF2AK2	1.0888	0.0447282
OLFML1	1.08486	0.0118118
COLEC12	1.08107	0.0110333
OPRL1	1.07695	0.0078327
CENPW	1.07687	0.00651602
ESPL1	1.07139	0.0262268
BASP1	1.06957	0.0267087
THY1	1.06814	0.0253048
RFTN2	1.06061	0.0150137
COL7A1	1.05913	0.0157861
GULP1	1.05617	0.0149261
TIMELESS	1.05246	0.00323785
LGALS4	1.05088	0.00603691
BFSP1	1.04716	0.01268
CLEC11A	1.04477	0.00184702
NCF2	1.04083	0.0457129
FAM221B	1.03655	0.0162021
PTN	1.03568	0.0288201
REPS2	1.03561	0.0205492
ACSM3	1.03491	0.0165267
RAD54L	1.03265	0.00130551
SPEF1	1.02943	0.0476094
ZNF277	1.02645	0.0139404
IL18	1.02405	0.0283572
ADAM11	1.02395	0.025167
KCNMB4	1.01963	0.0429897
ZFPM2	1.01945	0.0109681
TREX2	1.01905	0.00847414
SORL1	1.01544	0.0235292
SLC2A11	1.01489	0.0125103
KNL1	1.01071	0.0399011
ECM2	1.00816	0.0284814
CHTF18	1.00146	0.0025512
ABHD1	0.999678	0.0110454
TRIM45	0.998326	0.017002
SOX12	0.992527	0.00316493
ANLN	0.992433	0.0133028
CTSZ	0.989608	0.00367525
PPFIA4	0.985236	0.0355862
CTSS	0.981478	0.0111565
CHRDL1	0.981181	0.0316807
ADHFE1	0.976097	0.00382829
SYNGR3	0.972454	0.0142579
OGN	0.968291	0.00840109
MYO3B	0.966969	0.0354205
CCDC171	0.965894	0.0476068
CDKN1C	0.962265	0.0301287
ITGAX	0.958429	0.0340715
COL4A5	0.952066	0.000885662
PTPRD	0.951813	0.022659
C1QTNF7	0.944896	0.0419867
WDR38	0.941879	0.00823919
PDE9A	0.938611	0.00232483
PTGDS	0.938527	0.0196412
ATP8B4	0.937055	0.0385391
SARM1	0.928055	0.0270534
OLFML3	0.923677	0.00781817
TCTN2	0.918762	0.0105457
ATRNL1	0.912034	0.00883853
HYKK	0.908989	0.0316536
KNSTRN	0.90429	1.81787e-06
TRERF1	0.899939	0.00946742
ZNF470	0.898689	0.0285494
ABCB1	0.896083	0.0471644
EFCAB7	0.895635	0.00241878
POLQ	0.893944	0.0242775
ARHGEF39	0.891025	0.0261941
LRRC17	0.890253	0.0493181
ABCG2	0.890019	0.00737624
HIF3A	0.884621	0.0403492
MDM1	0.883861	0.0434401
TLR1	0.877887	0.0485349
SLC40A1	0.864854	0.0476132
KCTD6	0.862122	0.0104955
CDH15	0.860161	0.004001
MAP3K5	0.85878	0.0390465
ZSWIM7	0.858339	0.00122267
EPS8L2	0.856724	0.0355429
FMNL2	0.851833	0.01268
NRM	0.850183	0.0194331
FIBIN	0.848362	0.0448535
CASKIN1	0.844823	0.00381886
ARHGEF25	0.840372	0.00562186
ZC3H6	0.837165	0.000653171
SESN3	0.826856	0.00295486
AMT	0.823613	0.00587102
NPNT	0.823019	0.00112218
DTL	0.821939	0.0287926
SERPING1	0.820289	0.0312254
TENT5B	0.815641	0.00405188
PARD6G	0.814782	0.0244766
FAH	0.809803	0.00400751
APBB2	0.809802	0.0119656
SEMA4F	0.80538	0.0419026
IQANK1	0.802167	0.0469647
TRIM9	0.798643	0.0175224
UNC119	0.786893	0.0200834
SYCE2	0.776747	0.0369477
LIX1L	0.76333	0.0125071
MYBL2	0.7528	0.0132704
METTL5	0.750501	0.039299
CCDC18	0.748427	0.0477222
CPLANE2	0.746292	0.0117055
ZNF790	0.744734	0.0461224
ZSCAN16	0.738501	0.0451956
CENPQ	0.730288	0.00597189
NPHP1	0.709189	0.00602477
ZNF624	0.708719	0.0311827
PIK3IP1	0.704963	0.0237018
DDO	0.703879	0.0275746
LYPD1	0.700232	0.00110774
PLTP	0.699045	0.0446226
XPO1	0.692971	0.00902752
TULP2	0.680496	0.0186995
BMP5	0.678282	0.0419867
IL17RE	0.677077	0.0370621
GALNT12	0.674121	0.0290081
ACAP1	0.672123	0.0423606
DHTKD1	0.67209	0.00476384
ARRB2	0.669026	0.0137707
MYL9	0.66365	0.00494895
VDR	0.661643	0.0283572
WDR6	0.659424	0.0365239
CCDC158	0.656542	0.00390813
RNASET2	0.65653	0.0129162
SYNE2	0.654129	0.0137466
ODF2L	0.653189	0.027008
SSBP3	0.647487	0.00651149
CYBB	0.6472	0.0259515
TWIST1	0.640155	0.0370621
CBX4	0.637997	0.0369477
FLNB	0.614331	0.00514524
ULK2	0.61194	0.0367835
ZNF484	0.610893	0.0394172
ABLIM1	0.606166	0.0265738
ERMARD	0.602131	0.0181642
TST	0.596523	0.0349586
TTF2	0.594105	0.0324037
RABGAP1L	0.585423	0.00746999
CBX7	0.578635	0.0161903
BEX4	0.575417	0.0408581
PBX1	0.56291	0.0235171
HEBP1	0.558351	0.0449986
NUSAP1	0.558286	0.0156917
NUDT13	0.555834	0.0199456
RPS6KA6	0.553479	0.0427306

## Sheet: TH cold DOWN
Gene	log2FoldChange	FDR
DNAH1	-5.22035	4.61913e-06
DNASE1	-4.67653	7.80608e-06
SLC14A2	-4.34182	0.000179575
KCNQ3	-3.67398	1.96353e-06
UPP1	-3.29609	1.25822e-06
RFLNB	-3.2494	3.09695e-06
SDF2L1	-3.24367	0.000142123
CRELD2	-3.15057	0.000119122
PTX3	-3.14994	0.000716298
GPX2	-3.11255	0.00121216
OTUD1	-3.10245	7.14389e-05
ANOS1	-3.07317	2.27188e-09
SLCO4A1	-3.06452	0.00147783
ADM2	-3.06212	0.000540472
RUNX1	-3.0542	0.000328719
ESM1	-3.04413	0.000722048
TCP11	-3.04269	1.11734e-09
MANF	-2.91352	7.67527e-07
RND1	-2.82785	1.37316e-05
TMC7	-2.82013	0.00258358
ATF3	-2.79537	0.00110478
HSPA5	-2.79012	8.31686e-06
RFX4	-2.7698	0.0139411
LRRC6	-2.74985	0.00359769
ID1	-2.73617	7.09875e-08
BMP6	-2.70597	1.47302e-07
RCAN1	-2.70061	1.21716e-05
PCP2	-2.69068	0.00300998
NPM3	-2.67944	1.02748e-05
SH2D5	-2.6706	0.00736072
UBE2QL1	-2.65883	0.000104384
HYOU1	-2.65842	2.36369e-06
SLC5A5	-2.55073	0.0257981
TMEM72	-2.51612	0.000285484
SYTL5	-2.51091	0.014597
LPIN1	-2.50312	0.000665419
S100A5	-2.49732	0.000195324
AEN	-2.49139	4.98699e-05
TIMP2	-2.46765	5.0541e-05
MAFF	-2.45902	1.32111e-11
SFRP5	-2.4504	0.0411684
TENM4	-2.43821	4.77135e-05
NOS2	-2.43121	1.39333e-07
S100B	-2.40827	0.00494159
SLC17A9	-2.4072	2.12709e-06
PDK4	-2.39843	0.0237293
LDLRAD1	-2.38873	0.0418095
EVL	-2.36562	6.81721e-06
GAL	-2.34977	0.000710237
MICAL2	-2.34267	0.000193645
PPIF	-2.33389	0.000205564
MICALCL	-2.33319	0.00847414
CXCL16	-2.30191	8.9318e-10
ENAH	-2.29851	4.88604e-06
KCNQ1	-2.29849	1.61404e-05
HCRTR1	-2.29836	0.000164618
RAP1GAP	-2.28375	0.0231957
ARHGAP22	-2.28013	0.00574125
NGB	-2.275	1.77431e-05
SLC2A10	-2.26757	0.000150733
OLFM1	-2.25637	0.00496601
FZD9	-2.25088	0.00857246
DUSP5	-2.23188	0.000154027
SIK1	-2.2302	4.43096e-08
MSX1	-2.22585	0.0198404
FTL	-2.2252	2.03005e-17
MCAM	-2.21046	3.43414e-07
VNN1	-2.20197	0.00378606
HSP90B1	-2.20135	5.25245e-06
FABP3	-2.19531	5.35901e-08
PDIA4	-2.19272	1.96353e-06
ID3	-2.18349	2.14073e-06
ABCC3	-2.1766	2.71987e-07
STRIP2	-2.16554	0.0164953
MAP3K8	-2.1507	0.00394859
SLC7A1	-2.14399	0.0014627
PGLYRP4	-2.13916	0.00625856
PDE4C	-2.13613	0.0091155
RHBDL2	-2.11407	3.45951e-05
LRRC73	-2.10603	0.0244593
ESPN	-2.10501	0.0221667
PRR15	-2.09822	4.14973e-05
CHST3	-2.08017	0.000615565
SDSL	-2.07182	0.000896135
POLR3G	-2.04517	0.000544205
STRA6	-2.0409	0.000754214
CDR2	-2.03937	1.96353e-06
CCDC151	-2.0353	0.00656419
FICD	-2.03506	0.000159495
PNLDC1	-2.03081	0.00122311
KCNJ1	-2.02766	0.000457166
DNAJB11	-2.02522	2.23428e-06
DNAJB9	-2.0195	2.56406e-07
AMN	-2.01118	0.0202736
CCDC134	-2.00749	5.64679e-06
AQP1	-2.00553	0.00968287
LPCAT3	-2.00477	1.24734e-05
OSGIN1	-1.99336	8.74339e-09
ME1	-1.99188	0.00259016
TAF4B	-1.99101	0.000510947
SLX4	-1.96514	0.000278067
POU2AF1	-1.9538	0.0181969
UNC5B	-1.94585	2.4139e-08
CX3CL1	-1.94235	4.10547e-05
SEMA7A	-1.94123	0.00486909
NPR3	-1.93587	0.000306752
UCK2	-1.9346	0.00738277
PJA1	-1.93293	7.87209e-05
RASD1	-1.92415	0.00647071
CALR	-1.91873	0.000125244
LRP8	-1.90998	9.90731e-05
SEMA3F	-1.90727	9.56547e-09
DGKI	-1.9013	0.0129119
EPOP	-1.89906	0.00197855
SLC7A6	-1.89432	0.000101138
UBE2D1	-1.87741	0.0076903
CTH	-1.86803	0.00178124
PSAPL1	-1.86795	0.0135529
GLUL	-1.8613	0.000284746
RRS1	-1.85895	0.000652391
METTL1	-1.84683	1.08345e-12
TIMM8A	-1.84528	0.000779678
CREB3L1	-1.84487	3.00655e-08
ROBO4	-1.84474	8.64142e-08
PDIA6	-1.84165	1.52098e-05
THBS1	-1.83866	0.0010387
S100A9	-1.83197	0.0385391
ACKR1	-1.83183	0.00103126
SLC25A20	-1.82981	0.00062648
SPRY4	-1.81825	2.50892e-05
NMB	-1.81526	0.0014416
TACC2	-1.81168	8.58713e-05
TESC	-1.80873	0.000336033
RGS6	-1.80181	0.000352377
RRP12	-1.80078	1.19304e-06
GRAMD2A	-1.80061	2.5422e-05
CACNA1H	-1.79816	0.00103126
LONRF3	-1.79788	1.29334e-06
PAPPA	-1.79661	0.000703633
SLC12A8	-1.78487	0.00181569
HERPUD1	-1.78313	3.8805e-08
KCNJ15	-1.78254	0.0189692
LRRC59	-1.77853	5.38532e-07
TCF15	-1.77364	0.00670131
HSPA1A	-1.77157	0.00283473
SPTBN5	-1.7599	7.87209e-05
IRS1	-1.75966	0.00398393
NT5DC3	-1.75906	0.0160753
ARID5A	-1.75694	0.000138027
WFDC1	-1.75562	7.81779e-05
MPV17L2	-1.74838	0.0026164
PNO1	-1.73426	0.00201116
HSPH1	-1.73303	1.20642e-05
GMPPB	-1.72909	0.000462646
SLC22A16	-1.72879	0.00694536
CSRNP1	-1.71986	1.01706e-06
PXDN	-1.71161	6.90545e-06
IGF2R	-1.70937	1.05983e-08
EHD3	-1.6973	6.10142e-08
MYC	-1.69716	0.0117055
CEMIP	-1.69644	0.0237443
DERL3	-1.69604	0.0084871
IFRD2	-1.69278	0.00032295
SEC24D	-1.69089	4.10637e-08
TLN2	-1.69032	0.000261597
RELT	-1.68714	0.01262
DGKD	-1.68512	8.24334e-06
SRXN1	-1.68127	4.9589e-06
BCL6B	-1.68036	7.66056e-07
CCT6A	-1.67462	7.47225e-05
SLC7A5	-1.67264	0.00871222
SLC35E4	-1.6689	0.00439927
PSMD14	-1.66887	0.0153612
ALYREF	-1.6674	0.00103126
SRPRB	-1.66527	8.84494e-07
IER5	-1.65322	2.23428e-06
TRAF3	-1.65178	0.000213219
ACSS1	-1.64997	0.00109771
PRTG	-1.64814	0.00205471
ALG5	-1.6467	1.96353e-06
KIAA0513	-1.64148	8.00999e-07
NOP14	-1.64113	1.86038e-06
WNT11	-1.63988	0.0120442
ACSS2	-1.6311	0.000540472
CLIC4	-1.63035	2.03843e-05
FHDC1	-1.6296	0.0101254
RPP38	-1.62737	0.00871222
ANKRD33B	-1.62304	0.000553815
RUBCNL	-1.62156	0.022363
GPR4	-1.62135	1.50141e-06
TGFBI	-1.62086	0.0176527
DBNDD1	-1.62063	0.0344904
KRT18	-1.61506	7.06314e-06
SLC51B	-1.61418	0.00746801
AK6	-1.61256	0.0118118
ODC1	-1.61124	1.77557e-05
DNAH9	-1.60778	0.0428995
WDR4	-1.60666	3.66867e-05
PVR	-1.60306	0.0137971
APOLD1	-1.6012	0.000125244
HSD17B1	-1.60013	0.00100748
NAGLU	-1.59797	8.38582e-06
CD93	-1.59653	0.0104373
SHC2	-1.59569	0.0200001
GJA5	-1.59543	0.000187436
PPRC1	-1.5946	1.77038e-05
DNAJC3	-1.59205	9.88269e-06
SLC35B1	-1.59043	0.000307874
SH3BP5	-1.58818	0.000604265
CCDC86	-1.58565	0.000713635
FGF1	-1.57907	0.0462316
CDK2AP2	-1.57485	0.000653171
PCDH12	-1.57433	8.89253e-05
RSL1D1	-1.57193	0.00232455
SORCS2	-1.56968	0.00423742
A3GALT2	-1.56882	0.0339433
NQO1	-1.56698	0.000223779
CTSH	-1.56482	1.57363e-05
LOXL4	-1.5639	0.0263168
ARSB	-1.56366	0.00143306
SELENOS	-1.56198	8.75729e-11
SOCS3	-1.55697	0.00152808
ITPR3	-1.55353	0.000847761
XBP1	-1.55275	2.41876e-05
FNDC1	-1.55256	0.000191131
MRPS25	-1.5523	0.0142579
SPON2	-1.54972	0.00147653
DACT2	-1.54917	0.0301341
SLC44A4	-1.54867	0.00682064
ATP1B3	-1.54127	6.61843e-09
RNF144B	-1.53801	0.0235661
DPP3	-1.53759	0.00203996
NHP2	-1.53555	0.00149043
TBL2	-1.53552	7.08009e-05
STC1	-1.53137	2.8102e-08
CNDP2	-1.53082	2.66311e-05
NOS3	-1.52995	3.9546e-06
AIMP2	-1.5293	0.00511886
STAC	-1.5197	0.00189841
SLC35E3	-1.51962	0.00272502
GPR62	-1.51777	0.0100791
BTBD11	-1.51719	0.0169365
RRP9	-1.51591	1.2578e-05
BLVRB	-1.50837	0.000290591
RENBP	-1.50546	0.000589161
GNL3	-1.50535	0.000896135
STIP1	-1.50467	0.0020557
RTL1	-1.50399	0.0278758
SURF4	-1.5005	4.39203e-05
MLYCD	-1.49854	0.00399715
MYRF	-1.49669	0.0202928
GAR1	-1.49656	1.58913e-10
MAGEE2	-1.49623	4.30293e-05
ADAMTS1	-1.49514	7.31002e-06
RRP15	-1.49424	0.00100748
NIPSNAP2	-1.4897	0.00607876
GRWD1	-1.48757	0.000561716
ADAMTS4	-1.48331	0.00111721
POLR2D	-1.4798	7.31552e-06
SMYD5	-1.47964	3.07672e-06
DIPK1C	-1.47766	0.017483
SEC11C	-1.47765	0.000474966
ABCF2	-1.47415	0.00308997
SLC25A13	-1.47295	0.0008709
CD40	-1.47078	0.00196495
VWA1	-1.46539	3.89948e-09
SYVN1	-1.46241	0.00109205
HDAC4	-1.46206	0.00115719
PRKCA	-1.45904	0.000131142
CHSY1	-1.45804	0.00143951
GOLGA4	-1.45765	1.90421e-06
PHTF2	-1.45701	0.0423254
TP53INP2	-1.45164	0.000104384
AMD1	-1.44911	6.02845e-05
TAFA5	-1.4486	0.00651883
UCHL3	-1.44748	0.00165509
WDR12	-1.44548	0.000138027
SH2D3C	-1.44502	7.98469e-05
NANS	-1.44243	0.000162438
PSMB5	-1.44176	0.00125924
SLC41A1	-1.44094	1.50141e-06
DLL4	-1.43867	0.000759987
PKDCC	-1.43769	0.000216541
RHOBTB2	-1.43513	5.98279e-05
ALDH1A3	-1.43493	0.000338503
UPRT	-1.43404	0.000109681
STRIP1	-1.43276	3.71934e-06
PDIA3	-1.4326	0.000216403
KIF1C	-1.432	0.0249591
IDH1	-1.42871	3.5221e-05
HES2	-1.42843	0.000594817
HNRNPAB	-1.42785	5.0859e-06
POMT2	-1.42348	1.07592e-05
TOMM40	-1.42345	0.00153558
NFIL3	-1.42343	0.0112359
DAD1	-1.42293	5.96143e-05
SLC2A8	-1.42195	1.71497e-05
TXN	-1.42116	0.000285484
MAP2K3	-1.41947	0.00740477
SLC39A7	-1.41917	1.35422e-07
CTPS1	-1.41885	0.000229222
B9D1	-1.41813	5.26547e-07
EIF4G1	-1.41487	2.12296e-05
APEX2	-1.41467	0.000517683
EDNRB	-1.41398	0.000334677
LRRC3	-1.41327	0.0193782
CKAP4	-1.41322	0.00952713
NOCT	-1.41256	0.0485076
ATP7B	-1.41119	0.00420811
P4HB	-1.41039	8.48305e-05
ENDOD1	-1.41	6.8597e-05
MRTO4	-1.40924	8.48305e-05
SLC33A1	-1.40766	1.73096e-05
PSMA1	-1.40716	0.0155841
FUOM	-1.40639	0.0199549
BTG2	-1.40168	9.7596e-06
NUCB2	-1.40095	0.000607046
GTF3A	-1.40052	0.00121847
SLC41A2	-1.39549	0.00120302
GSTM3	-1.39537	6.8578e-05
GSR	-1.39131	0.00187779
TBRG4	-1.39082	0.0185116
MRPL15	-1.39025	0.00648162
EEF1E1	-1.38923	0.0144079
TIGAR	-1.389	0.0222759
ADCK1	-1.38881	0.00242252
NDUFA10	-1.38867	0.0283582
FBL	-1.38803	0.000594817
TAGLN	-1.38799	0.00110922
SLC1A5	-1.3817	0.0234069
XYLT1	-1.38166	0.0258476
CACFD1	-1.38124	0.00139976
KIFC2	-1.38049	0.0244833
ZNF593	-1.3796	0.000972099
APOO	-1.37856	0.0355862
FMNL3	-1.37785	8.64142e-08
SEC23B	-1.37353	1.24175e-05
RRAS2	-1.37238	0.0453135
NIFK	-1.37045	0.00273432
PWP2	-1.37	1.54207e-08
TXNDC5	-1.36997	8.13617e-06
PGAM1	-1.3684	5.96339e-07
SIL1	-1.36655	0.000131208
HSPA4	-1.36475	0.000326894
KIF26B	-1.36361	0.0463759
TGM2	-1.36189	0.00746999
PUSL1	-1.36173	0.00113889
MRPS18B	-1.36117	0.00215909
ESRRA	-1.35994	0.00196495
GPI	-1.35887	0.00500234
POMGNT2	-1.35731	0.00264017
KBTBD11	-1.35412	1.90421e-06
PLIN2	-1.35409	0.00663066
RELB	-1.35354	1.89721e-06
ANKRD9	-1.35354	0.0355862
B4GALT7	-1.35277	1.01629e-05
RPF2	-1.35245	0.0322062
COPS8	-1.35224	0.000859063
VARS	-1.34828	0.000120694
DYSF	-1.34786	0.0343792
POP1	-1.34778	0.00252023
YRDC	-1.34548	7.05285e-07
MED9	-1.34531	6.4567e-05
HSDL2	-1.34529	0.0113982
HEY1	-1.34419	0.0172205
MOGS	-1.34273	3.29133e-06
STT3A	-1.34237	4.49868e-07
SVIL	-1.34011	0.0490758
BYSL	-1.33975	2.62828e-06
ROCK2	-1.33749	0.00972579
NPC1	-1.33498	0.00656419
NOP16	-1.33278	1.12619e-06
ITPRIP	-1.33157	0.000844259
CCT5	-1.33014	0.000330947
TIAM2	-1.32973	0.0482735
HDLBP	-1.32927	3.41713e-05
TMEM185B	-1.32904	3.29133e-06
ITGA5	-1.32556	1.53495e-10
GNMT	-1.32522	0.00492997
GPATCH4	-1.32402	4.91792e-10
NOLC1	-1.32377	9.72873e-05
ADAMTS12	-1.32256	0.00594253
MYBBP1A	-1.32178	1.32266e-05
VEGFA	-1.32174	0.000658172
EEF1AKNMT	-1.3187	2.86619e-06
SEC61B	-1.31769	3.46731e-06
PINX1	-1.31769	5.24123e-05
TRIB2	-1.31757	0.000824184
PDE10A	-1.31754	0.00333243
SELENOH	-1.31484	6.48767e-06
AGPAT2	-1.31463	0.00514279
SLC27A4	-1.31278	0.00382829
REXO4	-1.31223	0.000468414
MRPS28	-1.31129	0.0386715
STK32C	-1.30982	0.00308997
PRELID1	-1.30928	1.89047e-05
NUDT4	-1.30864	0.00355608
RASSF2	-1.30828	0.000554875
ALDH18A1	-1.30531	1.79477e-05
CALU	-1.30154	0.000441118
RCOR2	-1.30137	0.0020557
NDUFA11	-1.30058	0.0110293
PECAM1	-1.30022	0.00152161
DDX56	-1.29743	3.52407e-06
ABHD11	-1.29474	0.00043588
S100A1	-1.29467	0.0332843
RDH13	-1.29448	0.00716882
MRPS7	-1.29379	0.0172205
OSMR	-1.29208	0.0169386
RTCB	-1.29144	0.00308997
ABCF1	-1.29014	0.000755653
SLC5A6	-1.28984	0.000447671
SRM	-1.2881	0.00011582
PSMD8	-1.2876	0.0146162
GNA12	-1.28457	0.000517683
SEC61A1	-1.28281	7.80608e-06
C1QTNF5	-1.2828	0.000222755
ATP6V1F	-1.28184	0.000365032
ABHD2	-1.28023	0.00172511
RALGPS2	-1.27784	0.0138288
ETF1	-1.27638	0.000570606
CHCHD2	-1.27469	0.0434479
SLC6A20	-1.27434	0.00616565
BAG5	-1.27291	0.00013499
AKAP12	-1.27264	0.00184267
KPNA2	-1.27245	0.00281089
CANX	-1.27203	0.000342989
CLUH	-1.27031	0.00280451
CYHR1	-1.26937	0.001395
HM13	-1.26902	4.46375e-07
EIF4A1	-1.26878	2.56406e-07
SDAD1	-1.26739	3.94709e-05
TMEM258	-1.26618	0.00033745
NDRG1	-1.26541	0.0045726
DENND3	-1.26481	5.77278e-05
KIAA1671	-1.26337	0.00442686
NUPR1	-1.26335	0.0182556
PLK3	-1.2631	0.000131208
MDN1	-1.26232	1.62583e-07
SRPRA	-1.26217	3.34865e-06
SGK1	-1.26184	0.0278837
KAZALD1	-1.26146	0.0195585
PRDX1	-1.26071	1.92309e-06
RNF115	-1.26069	0.018026
DDX54	-1.25947	4.29212e-05
PGP	-1.25941	0.00806159
VILL	-1.25908	0.0264727
TMED9	-1.25867	0.000116552
ETS1	-1.25674	6.95392e-05
NMT2	-1.25645	0.0112911
FAM163A	-1.25595	0.0162338
RFK	-1.25558	1.7579e-12
PLAT	-1.25455	0.00258358
LIG3	-1.25427	1.2604e-05
UFM1	-1.25413	2.20214e-05
SPCS3	-1.25368	0.000713635
TEX2	-1.25122	5.24123e-05
B3GALT6	-1.24872	0.0106609
NOL9	-1.24759	1.6085e-07
SEC61G	-1.24736	0.00402563
POLR3E	-1.24733	5.93634e-06
CIAPIN1	-1.24651	0.000999281
PLEKHO2	-1.24621	1.20049e-05
FKBP2	-1.24602	0.00151588
KDELR3	-1.24393	0.00039908
SQSTM1	-1.2439	0.00209702
SLC35A2	-1.24382	8.57599e-05
HMOX2	-1.24342	0.0137776
GRIN3A	-1.24145	0.0181208
PPP1R15A	-1.24111	0.000177638
APCDD1	-1.2411	0.00370788
GIPC3	-1.24081	0.00210569
GPC4	-1.23793	0.00255182
NDUFB1	-1.2377	0.0197185
EVA1C	-1.23752	0.00297515
CD9	-1.23751	0.00466386
SAR1A	-1.23741	1.30519e-08
ACOT7	-1.23624	0.00199844
TRMT61A	-1.23616	8.39888e-05
TRAPPC11	-1.23558	0.0204549
FAM136A	-1.2343	0.000474966
PSMC4	-1.23398	0.00118716
NRP2	-1.23385	0.000835906
CALM1	-1.23207	1.42484e-06
SEH1L	-1.23205	0.00081072
SEC22B	-1.23103	2.50245e-06
NOC4L	-1.23008	0.000878569
MTCL1	-1.22954	0.000323922
ASB11	-1.22947	0.00360698
PPARGC1A	-1.22929	0.000137592
NLN	-1.22895	0.00113889
ARSI	-1.22846	0.0285544
TMED2	-1.22626	4.53926e-05
SLC22A15	-1.22568	0.0129708
EDA	-1.22497	0.00968999
RPN1	-1.22448	0.00022266
POMP	-1.22345	0.00963959
WSB2	-1.22302	0.0186314
SLC25A15	-1.22201	1.69387e-07
EAF1	-1.21988	2.96475e-05
BCL2	-1.21808	0.0096621
SARAF	-1.21754	0.00565337
RBM28	-1.2173	0.000598404
DNAJB4	-1.21664	0.00667577
ISG20L2	-1.21643	1.02466e-06
GJB1	-1.21562	0.00636894
ZSWIM4	-1.21231	0.00348072
ARF4	-1.21208	0.00315953
PREX1	-1.2116	0.000489837
YARS	-1.21092	0.00867417
BAX	-1.2108	1.77557e-05
CNPY3	-1.21023	0.000722144
PSMD3	-1.20844	0.00388478
SELP	-1.20823	0.00423512
TSR1	-1.20797	2.55214e-05
ASS1	-1.20756	0.0179408
TINAGL1	-1.20743	0.0028462
ADCY3	-1.20735	0.0121491
YIF1A	-1.20723	9.84232e-05
ARHGEF15	-1.20666	0.00199844
RNFT1	-1.20627	1.90421e-06
IRS2	-1.20518	0.000963565
PDCL3	-1.20469	0.0244766
MRPL12	-1.2046	0.00210569
DNHD1	-1.20372	0.0031116
IPO4	-1.20106	3.08143e-06
SH3TC1	-1.20016	0.00121634
ZMPSTE24	-1.19923	6.75588e-05
SLC31A1	-1.19855	0.00694733
MRPL27	-1.198	1.05571e-05
PGM2	-1.19768	7.66056e-07
DUSP4	-1.1976	0.039212
BZW1	-1.19673	1.89721e-06
ARMC2	-1.19659	0.00845144
CCDC149	-1.19653	0.0208997
TMEM129	-1.19526	3.00927e-05
GCHFR	-1.19459	0.0199357
DAPK3	-1.19444	0.0138288
UTP18	-1.19441	0.00108775
GNAZ	-1.19439	0.00624481
PSMC2	-1.19425	0.0259235
SYNE1	-1.19272	3.46731e-06
PINK1	-1.19256	0.0171525
G6PD	-1.19213	7.71292e-06
AKAP1	-1.1921	0.0018303
APLNR	-1.19186	0.0343289
DDOST	-1.19186	0.00167958
LTV1	-1.19104	0.000749957
HIGD1A	-1.19092	0.0179574
UGGT1	-1.1906	0.0091155
TTYH3	-1.19057	0.0035743
STXBP1	-1.18907	0.00585922
CLCN5	-1.18807	0.037902
PES1	-1.18798	4.46375e-07
GPX4	-1.18764	0.00386872
TIMM13	-1.18752	0.00834873
ARMC6	-1.18733	0.0129151
NOL6	-1.18653	0.000703633
HMGXB3	-1.18646	2.67005e-05
PSMB7	-1.18558	0.040871
PUS7	-1.18411	0.00027778
ATF6	-1.18309	7.79752e-05
LRRC32	-1.18219	0.0035083
RBM19	-1.18216	0.00034062
DET1	-1.18214	0.0171285
NCR3LG1	-1.17975	0.000976553
KCNK6	-1.17937	0.0101899
PSEN2	-1.17781	5.52122e-05
ADRM1	-1.17707	0.000888389
DNAJB1	-1.17699	1.14059e-07
MAPK6	-1.17408	0.00390813
EARS2	-1.17272	0.000246497
TTPAL	-1.17248	0.000175948
ZNHIT6	-1.17162	0.00370788
TTC39A	-1.17108	0.0195331
MON1A	-1.17098	0.0013627
TFB2M	-1.17039	0.0160753
CCDC124	-1.16944	0.00195101
CMTM7	-1.1686	0.0296053
PDE1C	-1.16678	0.000661651
SH3BP4	-1.16674	0.0011687
SLC38A1	-1.16672	0.00219278
USO1	-1.16519	8.22009e-05
HSPBP1	-1.16517	0.00472082
MAPKAPK2	-1.16502	0.00248406
RRBP1	-1.16453	0.00237522
TTC27	-1.16376	0.00119073
NABP1	-1.16341	0.00171475
SLC18A2	-1.16321	0.030133
GSS	-1.16242	0.00152161
PQLC2	-1.16228	0.00544647
ICOSLG	-1.16195	0.000883189
WDR86	-1.16012	0.0178841
PGM3	-1.15986	1.20049e-05
DDX10	-1.15972	0.00132446
ACSL4	-1.15914	0.00522107
PGAM5	-1.15886	0.000397375
EMC8	-1.15752	0.00965156
PRMT5	-1.15574	0.00335965
RIOK1	-1.1546	3.98534e-07
KCNK1	-1.15432	0.00690937
EIF3B	-1.15165	0.000265625
GNB5	-1.15036	0.00164208
AFAP1	-1.1498	0.000365032
SLC39A13	-1.14969	3.43048e-05
SDHB	-1.14834	0.0203233
TPMT	-1.14805	0.0250912
VASN	-1.14667	0.021153
PIEZO1	-1.14603	4.41849e-07
AMPD2	-1.14495	3.2875e-05
ZDHHC20	-1.14355	0.000703633
CHCHD4	-1.14347	0.00107837
ZNHIT3	-1.14282	0.00280688
PRPS1	-1.14255	0.0184836
HES4	-1.14215	0.0217943
PIGA	-1.14193	0.00275115
TMED10	-1.14079	0.000109757
TMEM50B	-1.13974	5.93577e-07
BCAR3	-1.13955	0.0108649
FAM219A	-1.13833	0.000213355
MFSD6L	-1.13807	0.0047845
PIR	-1.13804	0.0025434
CRY1	-1.13774	0.0039952
CFAP73	-1.13729	0.0101159
SEC13	-1.13649	0.000391802
FITM2	-1.13562	0.0339537
TOMM34	-1.13392	0.000153767
GMPS	-1.13231	0.0382802
IMP4	-1.13175	0.000315322
RRP8	-1.13162	4.41849e-07
POLR1B	-1.1316	5.21171e-06
FJX1	-1.13104	0.000156846
COPG1	-1.13076	0.00067592
OSTC	-1.13011	0.000833144
CTTN	-1.12968	2.31832e-06
ATP6V0D1	-1.12947	0.00113259
CDS1	-1.12932	0.0467681
KRT8	-1.12899	0.00444855
CRYL1	-1.12879	0.0074896
THAP4	-1.12824	0.00328186
VAPA	-1.12779	0.00752037
ATP5PO	-1.12655	0.0446778
NOC2L	-1.1262	3.62079e-06
USP5	-1.12604	0.00193007
ADAMTS9	-1.12574	0.00288279
RPN2	-1.12559	0.00132326
TMEM214	-1.12418	8.26404e-06
ARL1	-1.12371	0.00058948
RPP40	-1.1225	0.00684837
TMBIM1	-1.12152	0.000705803
ZBTB21	-1.12138	8.98726e-06
ATP5PF	-1.121	0.0156966
DNAJB6	-1.1195	0.000444815
PRMT1	-1.11941	0.00078123
NOP2	-1.1192	1.36149e-06
GRPEL1	-1.11855	0.0171528
TM4SF18	-1.11797	0.00206867
TUBA1C	-1.1179	0.0125392
SPATA5	-1.11751	0.00189841
ATF4	-1.1166	0.00597462
SNRPD1	-1.11628	0.00758129
EEFSEC	-1.11501	4.99489e-05
DDIT3	-1.11471	0.00215909
DIPK2B	-1.1147	0.0209361
TSACC	-1.11317	0.0484678
CCDC85B	-1.11299	0.00127764
MTCH2	-1.11281	0.0025808
STK10	-1.11049	7.89713e-05
ST3GAL4	-1.1096	0.00937008
RPP21	-1.10909	0.0115268
PCYT2	-1.10842	0.0311949
LMAN1	-1.1067	0.000261597
RAPH1	-1.10642	0.00821385
PMM2	-1.10576	9.59275e-05
HHIPL1	-1.10534	0.0067702
ACOT11	-1.10363	0.0469647
PFKFB2	-1.10354	0.000497005
THSD4	-1.10185	0.0434479
TNFAIP8L1	-1.10168	2.1884e-05
SRP19	-1.10151	0.00109674
EIF2AK3	-1.10137	4.5361e-06
EIF4E	-1.09956	0.00585086
TMEM86A	-1.09883	1.92309e-06
NAT10	-1.09858	7.50011e-05
CSPG4	-1.09839	0.0388263
FTSJ3	-1.09834	2.1327e-05
DNAH17	-1.09569	0.000111517
YIF1B	-1.09455	0.0209651
BUD23	-1.09428	0.0100866
ARHGEF10L	-1.09224	0.0208038
NFKBIE	-1.09147	0.00355555
HDDC2	-1.09122	0.0372064
TIMM44	-1.09075	0.0207168
TTC4	-1.0891	0.00382829
BEND3	-1.0889	2.1884e-05
PREB	-1.08871	0.00021147
ERLIN1	-1.0869	6.75914e-06
SNRPB	-1.08683	1.35708e-05
PODXL	-1.08683	0.00548282
HSP90AA1	-1.08647	0.000615687
TPO	-1.08637	0.0066063
MTERF3	-1.08616	0.030133
DDX21	-1.08602	5.03203e-06
CEBPB	-1.08585	0.0131402
MRPL20	-1.08411	0.00130526
REXO2	-1.08349	0.0011687
SPCS2	-1.08344	6.9513e-05
MRPS27	-1.08242	0.0355888
SLC29A1	-1.08219	0.00469236
UTP20	-1.08192	0.00376558
ARHGDIA	-1.08173	0.000165462
TEN1	-1.08127	0.0042567
RIOX1	-1.08048	0.00527316
GSPT1	-1.07992	0.00565337
PNPO	-1.07983	0.00311091
PSMA5	-1.07972	0.0159908
DCTD	-1.07871	0.000246497
PRDX5	-1.07839	0.000517257
RAB29	-1.07755	0.0221553
SERP1	-1.07739	6.04874e-05
RAB11FIP4	-1.07677	0.0238204
SELENOK	-1.07632	1.77557e-05
PSMD1	-1.07606	0.0119167
IFRD1	-1.0748	0.00469236
CDV3	-1.07457	0.0277093
CREM	-1.07408	0.00861394
CDC25A	-1.07365	0.00990886
YKT6	-1.07358	0.000446286
SLC6A17	-1.07291	0.0372064
SH3PXD2B	-1.07289	4.23846e-05
CRB3	-1.07244	0.0159472
BAP1	-1.07213	0.00011321
CLPB	-1.07159	0.027709
MSRA	-1.071	0.00658573
WDR43	-1.07052	0.00122311
PPP1R10	-1.06931	0.000163221
CCDC85C	-1.06711	0.00176993
KIAA0930	-1.06655	0.00434437
GMPPA	-1.06584	0.00934628
NOP58	-1.06574	3.34865e-06
UBFD1	-1.06482	0.00295271
ELOVL5	-1.06472	0.00196495
ATP2B2	-1.06451	0.0150203
PSMD11	-1.06435	0.00227434
HSCB	-1.06334	0.00528773
SNX19	-1.06304	0.000336033
METRNL	-1.06239	0.0453864
BNIP3	-1.06066	0.0104669
PFKL	-1.06063	0.000621856
DDX18	-1.06039	3.34865e-06
EDEM1	-1.06032	0.00139871
EMG1	-1.06023	0.00706174
NDUFB11	-1.05994	0.0331466
PSMD6	-1.05952	0.0110293
TRAM1	-1.05902	4.15808e-05
WIPI1	-1.05794	0.00363556
NEDD4L	-1.05788	1.35422e-07
LARP4	-1.05761	0.000443433
STK17A	-1.05642	0.0126219
KLF2	-1.05628	0.0122989
GNPNAT1	-1.05623	0.00136773
LRPPRC	-1.05598	0.0235472
RCC1L	-1.05537	3.60835e-06
TTLL1	-1.05516	0.03591
LRFN4	-1.05502	0.00812166
UBE2N	-1.05465	0.0270534
MRI1	-1.05457	0.00145725
RITA1	-1.05427	1.64786e-06
ENO1	-1.05348	0.00622705
UBN1	-1.05186	0.0001819
DMAC1	-1.0516	0.0168624
NDUFB7	-1.04916	0.0331624
BAG1	-1.0483	0.0177452
PSMD7	-1.04778	0.00309212
USP2	-1.04769	0.0268769
M6PR	-1.04707	1.37316e-05
UBTD1	-1.04437	0.000443433
MYO19	-1.04198	0.0490453
PPP1CA	-1.04161	0.00793182
BEX2	-1.0411	0.0166295
PSMA6	-1.04022	0.0126343
TUFM	-1.03951	0.0113332
CYSLTR2	-1.03861	0.00862682
SAE1	-1.03839	0.00258358
KIF16B	-1.03821	0.000652695
LMNA	-1.03819	0.0141576
HSPD1	-1.038	0.00494672
TSSC4	-1.03679	0.0359326
PSMA7	-1.03666	0.00703347
OGDH	-1.03662	0.0107679
ZPR1	-1.03654	0.000120068
PSMC3	-1.03602	0.0135529
PRXL2B	-1.03581	0.0311949
SHANK3	-1.03576	0.00273432
DPH3	-1.03574	0.0331624
SBF1	-1.03504	0.00376558
NAA40	-1.03333	0.00114103
PDGFB	-1.03303	0.00812644
MMACHC	-1.03261	0.0189609
CCNJ	-1.03202	0.000647239
PTGES2	-1.03149	0.00963959
MAK16	-1.03145	0.00208129
OGFOD3	-1.03118	0.00988302
DNAJA2	-1.03094	0.00329643
SRP68	-1.02982	0.00019485
USPL1	-1.02962	4.64247e-06
ALG2	-1.02953	0.00310121
GOLT1B	-1.02888	0.000640117
NUP93	-1.02879	0.0013017
DRG1	-1.02874	0.00914427
MESD	-1.0268	0.00011446
WDR75	-1.02652	0.00306863
THBD	-1.02582	0.0358195
GNL2	-1.02581	0.00078902
CHID1	-1.02532	0.00651602
TMBIM4	-1.02521	0.00114103
STK40	-1.02521	0.000366791
GORASP2	-1.02519	3.96955e-05
MORF4L2	-1.02446	2.1374e-06
ABI3	-1.0227	0.00396625
PPP1R9A	-1.02269	0.00220766
DOHH	-1.02122	0.0222146
PRDM1	-1.02121	0.0242311
TSEN54	-1.02104	0.0191473
RUVBL1	-1.02091	0.00157115
EXOSC6	-1.02069	0.000916643
CPM	-1.02055	0.0165464
TMEM120B	-1.01983	0.000741364
MPHOSPH10	-1.01886	0.000338503
DOT1L	-1.01857	1.86038e-06
MLEC	-1.01829	0.000533898
CCDC58	-1.01751	0.0499478
ITGB3	-1.01627	0.0492294
CLDND1	-1.01624	3.28002e-07
IMPDH2	-1.01622	7.47162e-06
HSD17B12	-1.01599	0.0196711
MAFG	-1.01478	6.04874e-05
LRRFIP1	-1.01455	0.00637182
FLT1	-1.01394	0.0240993
JCAD	-1.01383	4.19491e-05
LPIN2	-1.0135	0.000555894
DPP9	-1.01282	0.0191473
PTP4A1	-1.0127	0.0189795
MGAT2	-1.01206	0.00104191
MUL1	-1.0118	0.0181006
NOP9	-1.01088	1.14341e-05
MECR	-1.01021	0.000155762
PSMC5	-1.0092	0.0104346
CCT2	-1.00854	0.0150137
LRP11	-1.0082	0.0157861
SND1	-1.00751	0.00998958
MRPL18	-1.00711	0.00288712
NOP10	-1.0071	0.0167964
TMEM184B	-1.00696	0.00201479
DERL1	-1.00682	0.00195816
DCAF13	-1.00552	0.00554987
RELL1	-1.00507	0.000180203
MAGED1	-1.00502	0.00361767
CTSB	-1.00494	0.00413659
STAT3	-1.00454	6.858e-05
FKTN	-1.00453	0.0241349
ATP6V1C1	-1.00403	0.00230266
PPP1R37	-1.00375	0.00540423
DNAJC25	-1.0036	6.83193e-05
PIP4P2	-1.00351	0.0467242
TIMM50	-1.00338	0.00466046
KTI12	-1.00326	0.00193007
DESI1	-1.00261	0.0104294
COPB1	-1.00115	3.94709e-05
CDH5	-1.00048	0.0194214
URB1	-1.00038	0.0029256
PRRC1	-1.00016	9.93672e-05
DEXI	-1.00016	0.0367835
ITGB5	-0.999476	0.0117445
E2F4	-0.999406	3.55245e-06
WDR46	-0.999182	0.0357761
CTSC	-0.99879	0.00163592
GEMIN4	-0.99528	0.0223719
GADD45A	-0.994137	0.00719513
ANO1	-0.992478	0.00496051
FBXL18	-0.990508	0.0203661
EIF6	-0.990434	0.000387615
RILP	-0.990253	0.0222349
SLC5A3	-0.989945	0.00528773
TNFAIP3	-0.989812	0.00280726
MTCH1	-0.989438	0.000869043
KPNA1	-0.988987	0.0421853
CASTOR2	-0.988855	0.0314478
FHOD1	-0.98827	0.0091155
BOP1	-0.987385	0.00311091
PLXND1	-0.987233	0.00628975
B4GALT1	-0.986819	0.020295
DNAJC11	-0.986602	0.0010387
SPAG1	-0.985963	0.000700746
NSUN2	-0.98565	0.00133565
SNRPG	-0.985649	0.00337951
NCKIPSD	-0.985116	0.0118765
INKA2	-0.98506	0.0451956
TRIM47	-0.985049	0.000482919
JMJD6	-0.98481	0.000468094
EPHA2	-0.984534	0.000261597
PREP	-0.984373	0.0294086
CISD3	-0.984316	0.003483
SEM1	-0.983721	0.0459281
N4BP3	-0.983689	5.18769e-07
UBE3C	-0.982895	5.09518e-05
BACH1	-0.9828	5.27098e-06
LAMTOR1	-0.981317	0.0221667
PDIA5	-0.981127	0.0129857
LSM12	-0.981013	0.00482387
PMPCA	-0.98098	0.0123434
PDE12	-0.980125	0.0255767
STX5	-0.97996	2.5422e-05
ST3GAL1	-0.979712	0.00381886
LMNB2	-0.979698	0.00232519
FAM107B	-0.97878	0.0111565
SEC63	-0.978401	0.000109757
EIF4G2	-0.977495	0.000976553
NR2C2AP	-0.976277	1.38854e-05
TMEM53	-0.975294	0.0100134
PISD	-0.975291	0.000222784
TIMM10B	-0.97474	0.00434103
PIGT	-0.974722	0.000594817
TP53I11	-0.974685	0.0104294
NCK2	-0.974002	1.88884e-05
SAR1B	-0.973668	0.0121474
NOM1	-0.973452	3.27659e-06
PSME3	-0.973302	0.000384606
PTGFRN	-0.972349	0.0310858
GGA2	-0.971472	0.000183615
ZMAT3	-0.971111	0.000462582
SLC48A1	-0.970845	0.00689215
PEX5	-0.970719	0.000396321
RRP7A	-0.970399	0.00122311
GALK2	-0.970246	0.00310889
IRAK2	-0.970217	0.00011874
IVNS1ABP	-0.969826	1.81367e-05
SMIM26	-0.968885	0.022587
MYCN	-0.968379	0.0373092
MAPK12	-0.968026	0.00947442
TMCO3	-0.967693	1.77431e-05
DNAJA3	-0.965247	0.0197873
PLEKHM2	-0.964928	0.000635953
EIPR1	-0.964501	0.021795
LYSMD3	-0.964316	3.39549e-05
TMEM120A	-0.963954	0.022216
RFWD3	-0.963593	0.00400167
AATF	-0.963501	0.000236119
HES1	-0.963385	0.0129162
PSMB3	-0.962819	0.0173098
MRPL21	-0.961875	0.0186894
NT5C3B	-0.961094	0.000315322
SWAP70	-0.960421	9.4413e-07
ELP6	-0.960395	0.0165267
EML1	-0.960365	0.0469118
JAK3	-0.960258	0.0236302
ERN1	-0.959933	1.50012e-05
UTP25	-0.959826	0.000108893
SSR1	-0.959708	0.00653753
SLC3A2	-0.959379	0.0257206
MRPL43	-0.959272	0.0335213
ELP3	-0.95895	0.000109757
NR6A1	-0.958276	0.00669986
WDR1	-0.957907	0.0278579
RTCA	-0.957402	0.0225338
ABTB2	-0.956343	0.00290692
MYO7A	-0.956217	0.0309004
DNPEP	-0.955754	0.000183615
BLOC1S4	-0.955476	0.0144187
TRIB1	-0.955316	5.09518e-05
MAVS	-0.955135	0.0102447
JAG1	-0.955134	0.000227965
RAB1A	-0.954934	0.0157021
NUS1	-0.954468	0.00165509
TRMT6	-0.954324	0.00109205
CLPTM1L	-0.954254	0.000205564
MRPL17	-0.954058	0.0136934
SKA3	-0.95385	0.00148104
GHITM	-0.95345	0.0101376
MAN1B1	-0.953411	0.00202053
POLR2E	-0.95336	0.00114732
XPO5	-0.9532	2.55376e-05
YWHAQ	-0.952688	0.000544205
PSMB2	-0.952645	0.0245037
DOLK	-0.952297	0.000373015
MFSD6	-0.951851	0.00964074
WDR3	-0.951436	0.000160783
SGSM2	-0.950329	0.0355906
ETS2	-0.950114	0.0139424
SEMA3G	-0.949723	0.0104294
TMEM70	-0.949695	0.0479545
ZFPL1	-0.949088	0.000457735
CHAC2	-0.947714	0.0363695
SMPD1	-0.947461	0.00246653
SUCO	-0.947409	0.00738277
SSR3	-0.947208	0.0102306
MED10	-0.946826	0.00426801
ACTN1	-0.946515	0.000166768
RAP1GAP2	-0.946511	0.0453068
TGFB1I1	-0.94602	0.00164208
NCDN	-0.945984	0.00693735
FAM114A1	-0.945788	0.00229762
TMEM181	-0.945402	0.0114093
AFG3L2	-0.94534	0.000652695
LETM1	-0.945066	0.00125153
MAPRE1	-0.944165	0.00871997
AMDHD2	-0.944133	0.00369954
SERINC2	-0.943968	0.0166144
TIMM22	-0.943685	0.0303071
MRPL48	-0.943592	0.0346278
MRS2	-0.943199	0.00790777
ABR	-0.942756	0.000174994
DNAJC5	-0.942579	0.0108379
CHST15	-0.942063	0.0103941
TMED1	-0.940847	0.0378484
PUF60	-0.940805	0.000226155
ITPRID2	-0.940795	0.0171422
PLEKHO1	-0.940734	0.0118118
EBAG9	-0.940532	0.00475579
SRP9	-0.939924	0.000752001
KDELR2	-0.939327	0.000111517
PRNP	-0.939321	9.51592e-05
VASP	-0.93932	9.72873e-05
IL4I1	-0.93807	0.0108013
BNIP1	-0.937678	0.0039999
NDUFV3	-0.93733	0.019796
RABGEF1	-0.937245	4.79375e-05
TMEM204	-0.937131	0.00856166
YTHDF1	-0.936944	0.0217822
FAM83G	-0.936538	0.0368056
GLRX3	-0.936529	0.0428351
NOP56	-0.936521	0.00167311
TRAP1	-0.936368	0.00189325
ARFIP1	-0.936226	0.00212462
CPT1A	-0.935732	0.00399715
GEMIN5	-0.935661	0.00377522
THAP12	-0.935126	0.00585461
FARSA	-0.935045	0.0112949
FAM110D	-0.93463	0.0104124
RCC1	-0.933818	0.00585086
SMG5	-0.933814	0.00863773
KPNA6	-0.933728	0.00691451
DIS3	-0.932577	0.00300998
CLIP2	-0.932029	0.00774799
PRMT3	-0.931636	0.00804263
RABGGTB	-0.931361	0.00181438
SHANK2	-0.93131	0.0124646
TLNRD1	-0.931035	0.00895152
CHPF	-0.930975	0.0096621
DCHS1	-0.93059	0.00781817
CTDP1	-0.929957	0.00011446
WNK1	-0.929812	0.00299718
MTOR	-0.929778	3.99513e-05
B4GALT2	-0.929736	0.00130273
PDE1B	-0.929684	0.00734921
PCBP1	-0.929277	0.000634229
NAA10	-0.928839	0.0104772
NPLOC4	-0.928396	0.00197855
EIF2B1	-0.927948	0.0093381
TXNRD1	-0.927493	0.0118552
PHB	-0.926608	0.0125739
OPA3	-0.925866	0.0362462
RAB11FIP5	-0.924878	0.00252141
SOAT1	-0.924776	0.00332485
ASB1	-0.92419	0.00193007
FOXK2	-0.924189	4.5472e-05
EMC3	-0.924081	0.00125007
MYADM	-0.923793	0.00514824
CTPS2	-0.92324	0.000692521
POLR3D	-0.923109	1.77431e-05
VWA5A	-0.922068	0.00804263
ZNF131	-0.922011	0.00144875
SERPINH1	-0.921714	0.0163581
PFAS	-0.921216	0.00194209
CC2D2B	-0.920991	0.0306614
CHST1	-0.920466	0.0125071
GLIS3	-0.9204	2.47077e-06
CAPN15	-0.920361	0.00232519
ARPC5L	-0.919602	0.0045726
PPP1R14A	-0.919538	0.0165982
XPNPEP1	-0.919292	0.00337559
RBM3	-0.919046	8.24334e-06
EMC7	-0.918999	0.00508962
SLC9A3R2	-0.918544	0.000334677
MYH14	-0.917757	0.00135444
PHC2	-0.917578	8.22225e-06
TMEM39A	-0.917575	8.39888e-05
CYTH1	-0.917022	8.57599e-05
ISOC2	-0.915819	0.0232395
GOSR2	-0.915508	4.04517e-06
CHPF2	-0.91516	0.000672527
SEC23IP	-0.914946	3.94709e-05
FTSJ1	-0.914728	2.12204e-07
LRRC8B	-0.914468	0.0140075
RASL12	-0.91426	0.0308637
HYAL2	-0.913893	0.00592113
FBXL7	-0.913815	0.0145319
OAZ1	-0.912394	0.00637182
TMEM208	-0.912273	0.0018797
NAA15	-0.911994	0.0111684
OTUD3	-0.91192	0.000285484
GPR21	-0.910942	0.0362836
NACC1	-0.910603	0.012975
GFER	-0.910279	0.000828667
KCNAB1	-0.909868	0.00535006
BTG1	-0.90982	0.0131794
CNPY2	-0.909256	0.000793064
DNAJC16	-0.908848	0.00620591
COPZ1	-0.908645	0.00145574
HSPA13	-0.908042	0.00149043
PFDN6	-0.907816	0.00584509
EFNB1	-0.907508	0.00387617
TBL3	-0.905915	0.00137397
LPGAT1	-0.905914	0.0119261
PLAU	-0.905737	0.0463728
TOLLIP	-0.905022	3.98143e-05
KLC2	-0.90437	0.00509204
NCLN	-0.904188	0.00140589
EIF2S1	-0.904128	0.0056528
TG	-0.904103	0.00589713
NUDT19	-0.904037	0.0020139
PSMD2	-0.903722	0.0093381
TSFM	-0.903689	0.00103182
ARCN1	-0.903349	6.4229e-05
PSMD12	-0.903242	0.0137323
KIAA1614	-0.903075	0.015931
LDB2	-0.902439	0.000520837
PSMC1	-0.901615	0.00361997
ZNF622	-0.901406	0.00487388
SLC25A17	-0.900758	0.00852217
SPECC1	-0.900629	0.00236526
DCTN5	-0.900423	0.0308818
SEC24A	-0.900399	0.000673386
SEL1L	-0.900368	0.00231837
CEP152	-0.900168	0.017264
STEAP3	-0.900115	0.0178949
NPDC1	-0.899973	0.012784
ZNF706	-0.899619	0.00153558
LBH	-0.899186	0.0368056
IDE	-0.899141	0.000107816
UMPS	-0.899101	0.000443433
VAT1	-0.899055	0.0254618
SLC39A11	-0.898773	0.0027583
GALNT2	-0.898709	0.00805407
STRAP	-0.898211	0.0474307
IL4R	-0.897873	0.000664728
TMEM263	-0.897402	0.00198555
EXD2	-0.897124	0.0453068
SLC35A4	-0.896965	0.0110454
NACC2	-0.896812	0.0231554
LRP5	-0.896747	0.00389126
DENR	-0.896706	0.00682634
LRRC27	-0.896351	0.0255539
HACD3	-0.896272	0.00450111
EMID1	-0.89586	0.0325691
MFSD12	-0.895262	0.0315752
ICMT	-0.895242	0.011013
PA2G4	-0.894721	0.00151873
GTF2IRD1	-0.893866	0.0181006
TMED7	-0.893848	0.00283828
PDE8A	-0.893677	0.00206867
DDX27	-0.893288	9.36098e-08
TM9SF4	-0.893106	0.000259174
PMEPA1	-0.893018	0.0397243
KLHDC4	-0.89301	3.52407e-06
USP42	-0.892739	0.00130449
GPS1	-0.892666	0.00291012
BCCIP	-0.891802	0.00308974
LLPH	-0.891569	0.0344894
HIGD2A	-0.891005	0.0130185
TMEM222	-0.890881	0.000182565
ACADVL	-0.890663	0.0137568
IDH3B	-0.890108	0.0324505
THAP5	-0.889972	0.030133
ST7	-0.889733	8.79589e-05
ARFIP2	-0.889681	0.00452128
IRAK1	-0.8896	0.00124202
ATP6V0A1	-0.889389	0.0181603
IMMT	-0.888392	0.0376973
RNF24	-0.888152	0.0253958
SMARCB1	-0.888093	0.0213862
LMTK2	-0.888014	0.000420637
TMEM186	-0.887939	0.0074896
CCDC117	-0.887857	0.00027778
COL14A1	-0.887785	0.000223066
RALGDS	-0.887778	0.00699533
PXMP4	-0.886488	0.0189609
PITRM1	-0.88587	0.000258607
APOBR	-0.885757	0.0127613
BABAM2	-0.885746	0.00735413
PICALM	-0.885179	0.000844259
ACSL5	-0.884899	0.0131677
PHB2	-0.88451	0.0129151
ACOT8	-0.884193	0.0134782
RIOX2	-0.883953	0.00238561
ACER3	-0.883065	5.54552e-05
CCT7	-0.882935	0.0233451
SHQ1	-0.882615	0.0359345
POLR2F	-0.881937	0.00675227
RPS19BP1	-0.881878	0.0042319
SNRPE	-0.88163	0.000336033
PBDC1	-0.881495	0.00514824
ATP6V0A2	-0.881447	8.58743e-05
RGS3	-0.881227	0.00454416
PPARD	-0.881182	0.00964781
CLEC16A	-0.881154	0.00258358
EIF4A3	-0.88094	1.2578e-05
TMEM104	-0.880542	0.0103941
TRADD	-0.880423	0.000551938
AGPAT3	-0.880371	0.0111327
COPB2	-0.879843	0.00188977
PDGFRB	-0.879774	0.0293868
BAZ1A	-0.879187	0.0174484
CCM2	-0.879171	0.000582839
LMAN2	-0.877094	0.000841447
ERP44	-0.877086	0.000604427
ADAM17	-0.87593	4.87165e-07
MPRIP	-0.875345	0.0018033
RIN3	-0.875174	0.00845144
SLC29A3	-0.874165	0.00472082
HMBS	-0.873782	0.00270624
PALD1	-0.873611	0.0182885
PSMD10	-0.873497	0.00549671
ILF2	-0.873338	0.0105715
CMIP	-0.873277	0.0306405
VASH1	-0.873172	0.0142302
CISD2	-0.872462	0.00011874
LAMTOR2	-0.871077	0.0129162
SEC31A	-0.871015	0.00227405
ADORA2B	-0.870348	0.00597008
MTRR	-0.868867	0.000645298
VTI1A	-0.868852	0.0018511
NUP153	-0.868794	0.00720791
URM1	-0.868429	0.00593549
UBE2J1	-0.868406	3.18732e-05
PTCD3	-0.868061	0.0159908
ASCC3	-0.867969	0.000462582
MSI2	-0.867932	0.00287099
SEMA5B	-0.867378	0.00522443
ATP6V0C	-0.867247	0.00560592
POLR2L	-0.867177	0.027008
RER1	-0.867137	7.75666e-05
RPS6KC1	-0.866891	0.0229037
TM4SF1	-0.865038	0.00148955
FASTKD5	-0.864858	0.0265216
EIF3G	-0.864817	0.0495827
APLN	-0.864151	0.000916643
POLB	-0.86399	0.0231746
TXNDC11	-0.863285	0.00161222
HS6ST1	-0.863159	0.0100266
UTP3	-0.862815	0.000164618
SEC24C	-0.862214	6.02845e-05
TNK2	-0.862101	5.64744e-05
UTP15	-0.861856	0.0206417
NPL	-0.861607	0.00776946
CCND1	-0.861271	0.0494979
EIF5	-0.8612	0.00853039
DUSP12	-0.861137	0.00523717
HK1	-0.861124	4.17929e-05
BAK1	-0.860444	0.002238
COG2	-0.86019	0.000645298
VAMP7	-0.859523	0.0206246
GTF2E2	-0.859444	0.000620722
ARSA	-0.859005	0.0453068
PIN4	-0.858489	0.0167179
SPNS2	-0.858403	0.000664728
MAPKAP1	-0.858383	0.000610434
FARS2	-0.85777	0.0210175
TMEM248	-0.857755	0.000242043
WDR89	-0.857038	0.033557
SLC26A3	-0.856923	0.0396598
SURF6	-0.85668	0.0074676
CDC26	-0.856284	0.000291049
USP39	-0.856204	0.00227805
CIAO2B	-0.85584	0.0451192
MAN2A2	-0.854801	0.000150733
FSCN1	-0.854764	0.0197655
PELI1	-0.85448	0.00082756
ELAC2	-0.854359	0.0121441
P3H3	-0.854043	0.0111817
TMED4	-0.853968	0.00396231
PIK3C2B	-0.853807	0.00571244
RPL7L1	-0.853485	0.00403999
AKIRIN1	-0.853043	0.00879942
PPP2R2A	-0.852997	0.0011603
CLTC	-0.852648	7.89145e-06
RANBP1	-0.852434	0.00431002
SNRPA1	-0.852074	0.00829791
BLNK	-0.851763	0.00353909
PSMB6	-0.85155	0.0266897
UAP1L1	-0.851417	0.00548282
NUDCD3	-0.851382	0.00159068
CRCP	-0.851365	0.00256738
DPM2	-0.850972	0.00658523
TM2D3	-0.850944	0.00177704
MINPP1	-0.850883	0.0197293
FADD	-0.850806	0.00157666
CLCN4	-0.850492	0.0115868
SCNN1B	-0.849456	0.0328249
GFPT1	-0.849211	0.00236144
EPHB3	-0.849001	0.0262052
EIF3A	-0.848959	0.010285
SPRYD3	-0.848893	0.000326894
ALG3	-0.848879	0.0422156
MICOS13	-0.848756	0.0289056
PDXDC1	-0.848732	0.000128046
MRPL34	-0.848496	0.00443782
IMP3	-0.847187	0.0138288
CRKL	-0.847142	0.031492
CLN5	-0.847079	0.0117857
TAF13	-0.847032	0.000422023
PCSK7	-0.846605	0.0100103
COPA	-0.84614	0.000268514
RNMT	-0.845411	6.02845e-05
MTAP	-0.844946	0.00951745
RRAGC	-0.844887	0.0199964
NAF1	-0.844878	8.16004e-05
FAM107A	-0.844861	0.0390206
ARF1	-0.844835	0.00217381
RPTOR	-0.84467	0.0063409
SRP54	-0.8446	0.0141451
DPAGT1	-0.844393	0.00391265
JUND	-0.844126	0.00433878
ANKRD52	-0.844058	0.00182412
RAB35	-0.843895	0.0045726
LARS2	-0.84351	0.022298
TBC1D20	-0.843319	6.9513e-05
KCNA6	-0.843255	0.0168123
MIEF1	-0.843086	0.0027954
HSPA8	-0.842699	0.0217389
GPN1	-0.842526	0.0162323
ATRIP	-0.841545	0.0233673
LSM7	-0.841512	0.0261388
HSF2	-0.841329	0.0366642
E2F3	-0.841029	0.00313153
DDB1	-0.840964	0.0184877
BRIX1	-0.840785	0.000391501
LMF1	-0.840662	0.00402405
DHODH	-0.840628	0.00486246
SMAP2	-0.840098	0.0112409
SPPL2B	-0.840034	0.0184918
STRBP	-0.839962	0.00189078
ZNF526	-0.839894	0.00646991
USP12	-0.839223	0.00152768
MCL1	-0.838102	0.00466011
VMA21	-0.83803	0.0319001
YWHAH	-0.836992	0.00173468
DDX39A	-0.836933	0.0129857
GOLGA3	-0.836881	5.12224e-05
ACBD3	-0.836507	1.38115e-05
SECISBP2	-0.836171	0.00242726
SRF	-0.836007	0.0190262
CCDC91	-0.835973	0.0030219
UXS1	-0.8356	0.0199962
ARL14EP	-0.835325	0.0338301
RNPS1	-0.83522	0.000388403
TNKS2	-0.835191	0.0311827
NSUN4	-0.83505	0.0153739
SCFD1	-0.834675	0.0088375
ADAT3	-0.834278	0.00979423
NUBP1	-0.833565	0.00682695
NDUFA4L2	-0.833164	0.0295631
NFKBIB	-0.83305	0.000262486
B4GALT5	-0.832167	0.0139373
FXYD5	-0.83121	0.034819
WDR83	-0.831096	0.0207731
GAS2L1	-0.831005	0.00219544
DDX49	-0.830599	0.00188086
SCAND1	-0.830395	0.00125007
NAV1	-0.830255	0.0354112
TMEM51	-0.830124	0.028878
EFL1	-0.829758	0.00509204
CRYBA1	-0.829653	7.66056e-07
AGO2	-0.829478	0.00201479
HNRNPM	-0.829427	0.0155389
CCDC115	-0.829299	0.0332184
RIPOR1	-0.829051	0.000885662
MBD3	-0.828925	0.0355429
EFTUD2	-0.828888	0.00294675
ZBED3	-0.828258	0.0276679
MRM1	-0.828192	0.011829
NAXE	-0.827603	0.0276856
PSMD4	-0.826001	0.0318979
ABCF3	-0.825722	0.00124202
CAPN2	-0.825502	0.0186445
PLEKHG1	-0.8254	0.026952
CMAS	-0.825274	0.0311949
TRIP13	-0.824956	0.00264584
PITPNA	-0.824472	3.96955e-05
BCAS2	-0.823097	0.0139404
LEO1	-0.822936	0.00548282
RAB15	-0.822906	0.00651602
PRKAR1A	-0.822728	0.000713635
RAPGEF1	-0.821171	0.0142351
RNF180	-0.82114	0.0283582
YIPF3	-0.820771	0.00219278
LRRC8A	-0.818985	0.012745
CHMP4B	-0.818802	0.00902752
CENPO	-0.817235	0.0112398
ATOX1	-0.816996	0.026447
CD63	-0.81689	0.00142971
ZNF697	-0.81676	0.00139219
AP5B1	-0.816626	0.0217758
ABCE1	-0.815919	0.00444855
ABCB8	-0.815745	0.0178949
SMAD7	-0.815161	0.00370148
ATP6V1E1	-0.814263	0.00889557
GNS	-0.814176	0.00880073
ACTN4	-0.813748	0.0095398
UGDH	-0.813545	0.00700882
DAG1	-0.812901	0.0451192
ECE1	-0.812874	0.00161222
GOLGA2	-0.812811	0.00122477
HEATR3	-0.812544	0.00871222
LRRC71	-0.812487	0.0179574
PEX11A	-0.811968	0.00942612
SYAP1	-0.81178	0.00988302
RNGTT	-0.81166	0.00359769
TRMU	-0.811487	0.014963
FAM98A	-0.810706	0.00519145
BMS1	-0.809977	0.00172091
CACUL1	-0.809883	0.0106244
PLCG1	-0.809837	0.0207028
FURIN	-0.809739	0.00244625
DHRS11	-0.809508	0.00656419
PICK1	-0.80895	0.0422156
PDCD5	-0.807798	0.0451383
FAM122A	-0.807757	0.0255918
NSF	-0.806983	0.00161052
SERTAD1	-0.80696	0.00865204
QTRT1	-0.805465	0.00227434
GAK	-0.805205	0.00159828
LTO1	-0.805202	1.95201e-06
SLC25A39	-0.805179	0.00883853
JUNB	-0.805021	0.0114773
PPIB	-0.804908	0.00772599
PLAA	-0.80475	0.0175224
ACTR1B	-0.804621	0.00025033
ARHGEF40	-0.80451	0.0359294
GOLGA5	-0.803957	0.000793235
TOMM5	-0.803908	0.00275007
MFSD11	-0.803586	9.72873e-05
UBE2J2	-0.803574	0.00069052
CASP7	-0.80338	0.0453864
SYNCRIP	-0.803349	0.000454465
ADIPOR2	-0.803272	0.00287339
BOD1	-0.803167	0.00738277
CREB3L2	-0.803056	0.000216991
EHD4	-0.802968	0.0206093
CCDC126	-0.802836	0.0245378
CPTP	-0.802342	0.000380191
MRPS23	-0.80207	0.00445544
AP1M1	-0.801985	0.00162817
COG3	-0.801575	0.000134573
WDR5	-0.801066	0.0025808
DDX23	-0.800881	0.000754214
MMGT1	-0.800209	0.000163237
CFAP36	-0.800177	0.000120229
DERL2	-0.800167	0.00162439
TFG	-0.799999	0.000713635
TM9SF1	-0.799841	0.000533718
CHERP	-0.799775	0.000574686
ATP13A1	-0.799446	0.0145779
GPN2	-0.798864	0.00206246
MAP11	-0.798779	0.0180517
FAM131A	-0.798415	0.0222307
RABAC1	-0.797992	0.0132554
NAP1L4	-0.797806	0.00149043
JAGN1	-0.797745	0.0232335
TSC22D1	-0.797741	0.010285
ARPC2	-0.797657	0.0020557
RCHY1	-0.797562	0.00607154
CMPK1	-0.797425	0.000881956
TCEAL8	-0.797282	0.0023
HGH1	-0.796583	0.00815349
ARIH2	-0.79642	0.0182746
NDEL1	-0.795934	7.75463e-06
PWP1	-0.795918	0.00166856
MIA2	-0.795384	0.00103182
RANGAP1	-0.795355	0.00518313
PFKFB3	-0.795201	0.0396519
MED27	-0.795194	0.00829791
NXT1	-0.795119	0.0247286
TNFAIP1	-0.794639	0.000287856
ERGIC1	-0.794463	0.00621452
RAI1	-0.794405	0.0177848
RASIP1	-0.794276	0.0092385
COQ4	-0.793545	0.0202776
NSMCE3	-0.793258	0.00900979
PTBP1	-0.792956	8.57599e-05
PTPRM	-0.792743	0.0145881
SPATA2	-0.792635	0.00636695
UBE2F	-0.791376	0.0186547
SAP18	-0.791131	0.0270695
FASTKD3	-0.790086	0.00448264
SAP30	-0.790001	0.046028
LIMK2	-0.789673	0.0301258
HIF1A	-0.789669	0.00401957
SDF2	-0.789577	0.0101436
ECSCR	-0.789503	0.00601853
DCUN1D5	-0.789125	0.01268
UFD1	-0.788234	0.00081072
CLN8	-0.788165	0.0131402
FNIP1	-0.786565	0.00110283
GID4	-0.785953	0.00399715
ATP2C2	-0.785708	0.0177848
HEG1	-0.784672	0.00643919
ZC3H8	-0.784353	0.000223779
POLR2G	-0.784082	0.0215019
RAB7A	-0.783087	0.00310121
LSM6	-0.782993	0.0177329
ELK1	-0.782658	0.00302058
ATPAF2	-0.782554	0.00717447
HDGF	-0.782456	0.0114158
TMX2	-0.7819	0.019602
PET117	-0.781722	0.0018186
PLCB1	-0.781668	0.0223907
DDA1	-0.781581	0.0372795
SSB	-0.781351	0.013695
AZIN1	-0.781331	0.0117381
TNFRSF19	-0.781017	0.00831981
L3MBTL2	-0.780903	0.0131103
RNF181	-0.78038	0.00420811
VPS53	-0.779832	0.00124202
SCOC	-0.779748	0.00196495
CDIPT	-0.779382	0.0103062
MRPS16	-0.779235	0.0439742
GUSB	-0.779166	0.0235171
SEC16A	-0.779137	0.0172308
TMEM259	-0.778667	0.000313844
UBE2M	-0.778073	0.0112166
SBDS	-0.777824	0.0459281
SSRP1	-0.777533	0.00244119
SUPT16H	-0.7775	0.00840411
PEPD	-0.777185	0.0391678
NEU1	-0.77718	0.00450242
RPIA	-0.777155	0.0171422
FAM8A1	-0.775911	0.00184267
RHOB	-0.775872	0.0123371
ESS2	-0.77549	0.00298823
ATP5ME	-0.775357	0.0408536
G3BP2	-0.775077	0.00607876
TANGO6	-0.774446	0.0119642
ZFYVE21	-0.774435	0.00795718
DUSP3	-0.774417	0.0252729
AACS	-0.774002	0.0159398
SCYL3	-0.773671	0.00658009
DPH1	-0.773323	0.00157922
DUSP16	-0.7729	0.0204549
SLC20A1	-0.772621	0.000999281
ZNF667	-0.77261	0.00300998
WDR61	-0.772004	0.00685382
HSPA12B	-0.771797	0.00137397
CNOT11	-0.771794	0.0125392
PLCG2	-0.771168	0.0324037
ACP1	-0.770435	0.0103726
SH2D4A	-0.770304	0.00777891
MCUR1	-0.770132	0.0139404
EXOSC10	-0.769906	0.000285484
ACTR1A	-0.769845	0.00682634
SHMT2	-0.769359	0.00966374
PI4K2A	-0.769147	0.00645878
FBLN7	-0.769111	0.0144187
NCL	-0.768916	0.0253624
PTGES3	-0.768675	0.00386185
NFKBIZ	-0.768625	0.0182276
GBF1	-0.768409	0.0103615
NRBF2	-0.768069	0.0290489
BRD7	-0.767962	3.86345e-05
SF3B3	-0.767829	5.96026e-05
TPST1	-0.76748	0.0345266
TPD52L2	-0.767417	0.00041943
BCLAF3	-0.766965	0.0115691
GTF3C6	-0.766556	0.00737624
ATP6AP1	-0.766171	0.0370291
CLPTM1	-0.766057	0.00392298
MORF4L1	-0.765624	0.0359044
LSG1	-0.765272	0.00121216
CAD	-0.765048	0.0166435
GNPDA2	-0.764584	0.0129204
UBE2L3	-0.764509	0.00961501
TTC7B	-0.764484	0.0067604
PHF23	-0.764455	0.0025512
PAK1IP1	-0.764437	0.000651564
LGMN	-0.763392	0.0436614
ZNF664	-0.762999	0.000882812
LDLRAP1	-0.76262	0.00111419
NRIP1	-0.762121	0.00103126
PSMD9	-0.761979	0.000797936
TOM1L2	-0.761587	0.0018033
PFDN2	-0.761391	0.0312947
TP53RK	-0.760896	0.00879942
TMEM106C	-0.76064	0.0132182
ENTPD6	-0.760446	0.00398655
MYCBP2	-0.760272	0.000410677
SH3GL1	-0.760161	5.12663e-05
RRAGA	-0.760037	0.0281079
EI24	-0.759694	0.0499206
VKORC1L1	-0.759653	0.0195537
DHX8	-0.759623	0.00189777
FRRS1	-0.75914	0.00247185
DNAJA1	-0.758706	0.00824119
TMEM33	-0.758551	0.000599842
ARMC5	-0.758242	0.0073005
CHMP7	-0.757962	0.0315325
SNX1	-0.757778	0.000190071
PDCD6	-0.757522	0.0129119
DENND2D	-0.756688	0.0142579
TTC13	-0.756288	0.0116207
GDPGP1	-0.756164	0.0451192
TOR1A	-0.755497	0.00960875
AKAP17A	-0.755391	0.00240609
ZZEF1	-0.754287	0.000473342
VSIG2	-0.754174	0.0358152
MTFR1	-0.753943	0.00796511
SSH3	-0.75365	0.00310121
RGS12	-0.753123	0.0446226
PARL	-0.753106	0.00962677
RPP30	-0.753052	0.0395121
CCDC127	-0.75183	0.0194571
SET	-0.751648	0.00217381
PLBD2	-0.751513	0.000582839
EEF1AKMT3	-0.751296	0.00341355
EIF3I	-0.750957	0.041084
LYPLA1	-0.750897	0.00734921
GPATCH3	-0.749621	0.00353909
DNAJC2	-0.749381	0.0185116
PEX14	-0.749329	6.72351e-07
RRP1	-0.748726	0.000220107
ARPC1B	-0.748543	0.0306431
DELE1	-0.748514	0.0151951
DHRS1	-0.748508	0.0133028
UBIAD1	-0.748406	0.0179574
BCL2L13	-0.748215	0.0335213
MRPL54	-0.748007	0.0146862
TAGLN2	-0.747996	0.00319156
SRSF2	-0.747981	0.0085896
MRPL57	-0.747943	0.0302574
AKT2	-0.747572	0.00716882
CLP1	-0.744586	1.90959e-05
SAMD8	-0.744514	0.0161843
CACYBP	-0.744392	0.00951745
RAB2A	-0.743652	0.0125392
ARFGEF2	-0.74344	0.00192376
EIF5B	-0.743021	0.0129423
TAF9	-0.742826	0.017461
MLF2	-0.742356	0.00227506
SWI5	-0.742211	0.017483
PIGQ	-0.742005	0.00394859
OXCT1	-0.741349	0.0344155
NUFIP2	-0.740659	0.00279654
WRNIP1	-0.740592	0.00942612
TM9SF3	-0.740573	0.000387831
UBA5	-0.740429	0.00573096
MIPEP	-0.739943	0.011302
CLEC14A	-0.739754	0.0373039
ROMO1	-0.739672	0.0486114
TMEM97	-0.73963	0.0348185
USP4	-0.739422	0.0396005
CDS2	-0.73893	0.00137397
SLC39A9	-0.738684	0.00944588
RALB	-0.738649	0.000804162
TRMT1	-0.738009	0.0404767
ZNF316	-0.737742	0.00100363
PLPP2	-0.737519	0.0188617
ALG12	-0.737137	0.0280159
DAZAP1	-0.737066	3.03441e-05
KRTCAP2	-0.736576	0.00782927
TTC9C	-0.736061	0.048804
RNASEK	-0.736052	0.00450111
WAPL	-0.735483	0.000248752
SPNS1	-0.735429	0.00396625
NSDHL	-0.735295	0.0129778
IFT20	-0.735267	0.00156705
EIF4ENIF1	-0.735084	0.00032295
TEPSIN	-0.735017	0.0153646
RFFL	-0.734981	0.00100363
KIAA2013	-0.734676	0.0479545
ACTR8	-0.734517	0.0121595
DHX29	-0.734284	0.00296699
FAM98B	-0.734228	0.0263133
MRPL55	-0.734023	0.0432217
KDM1A	-0.733913	6.74135e-05
CDC37	-0.73391	0.0298652
TWF1	-0.733673	0.00151587
MYDGF	-0.733594	0.00280726
ARFGAP1	-0.733483	0.00920324
TRAPPC9	-0.733373	0.0217389
UBA2	-0.732931	1.408e-05
THAP8	-0.73291	0.0268485
PRDX2	-0.732875	0.00541385
NECAP1	-0.732446	0.00022266
EIF1AX	-0.732405	0.00421079
OSGIN2	-0.732385	0.00943513
POP4	-0.732336	0.0182885
FASTK	-0.732283	0.00967745
DDX47	-0.731799	0.00120863
UBR4	-0.731262	0.00353935
RPL18A	-0.731186	0.00343054
TMED5	-0.731162	0.0096505
ZNF25	-0.730629	0.000621856
ABCC5	-0.730612	0.0279916
EXOSC4	-0.730067	0.00879823
ADSL	-0.729806	0.0186314
SUGP2	-0.729683	0.0275746
IER3IP1	-0.729066	0.000224383
ATG4B	-0.728886	0.00962457
MYO5B	-0.728712	0.0212104
ENSA	-0.728061	0.0108444
AP1B1	-0.727908	0.0322062
SETX	-0.727899	0.00232694
UCP3	-0.726718	0.0221665
SS18L1	-0.726657	0.0393145
SPTY2D1	-0.726623	0.00130551
RB1CC1	-0.726618	0.0243761
MMRN2	-0.7266	0.0223596
PPIL1	-0.726573	0.00741757
DNM1L	-0.725432	0.0314952
PARN	-0.725375	0.000353666
SRSF9	-0.725184	0.00260851
DUS3L	-0.725013	6.95814e-05
REPIN1	-0.72476	0.000992409
EPCAM	-0.724454	0.0327647
SLC6A8	-0.724362	0.0383775
POLR3A	-0.724254	0.000282567
SENP3	-0.72415	0.000229222
ARMC7	-0.724138	0.0125392
NSRP1	-0.723933	0.00658573
HARBI1	-0.72383	0.0176967
TADA2B	-0.723648	0.0238273
SMARCA4	-0.723628	0.00219213
SEPHS2	-0.723472	0.000764588
UBE2D3	-0.723412	0.0187832
NEU3	-0.722949	0.0366989
EZR	-0.722825	0.0055131
KTN1	-0.722264	0.0175742
PAF1	-0.722248	0.000101551
RYK	-0.721989	0.00258084
PSMB1	-0.721955	0.0362486
CHUK	-0.721834	0.00574338
WWC3	-0.721658	0.00607876
BPNT1	-0.721029	0.00345699
EFHD2	-0.720866	0.0055715
CDC42BPB	-0.720582	0.000202385
VOPP1	-0.720298	0.0106823
KDM4A	-0.720242	0.00733672
MSN	-0.719622	2.12709e-06
LARP1	-0.719507	0.00172091
SIGMAR1	-0.719297	0.00156918
HNRNPH2	-0.719118	0.0296424
RPUSD2	-0.719101	0.0136372
TIPARP	-0.718881	0.0200001
EIF3L	-0.718738	0.0375578
CPOX	-0.718535	0.0178247
RAMP2	-0.71851	0.014963
EIF4G3	-0.71846	0.0325045
NANP	-0.718282	2.24163e-05
METTL21A	-0.717782	0.000710237
FDX1	-0.717524	0.0471971
SRP14	-0.717383	0.00657717
PSMA4	-0.716486	0.009621
PLOD3	-0.716387	0.00947442
GBE1	-0.715971	0.0356119
EMC1	-0.715898	0.00656419
RAB5A	-0.71585	0.000454322
BCDIN3D	-0.714791	0.000835906
ADSS	-0.714553	0.0074676
AP3S1	-0.714052	0.0440208
RANGRF	-0.713416	0.033413
DAB2IP	-0.713092	0.0177294
SDC4	-0.712862	0.0373437
TKT	-0.712285	0.0319001
PGS1	-0.71224	0.00308997
SMIM27	-0.712119	0.0191473
PDZD11	-0.711912	0.0106133
SPART	-0.71153	0.0204549
BET1	-0.711514	0.00492997
ATP6V0B	-0.711375	0.0028162
THUMPD1	-0.711158	0.0156316
MYZAP	-0.710687	0.0259515
IMPAD1	-0.710578	0.00182412
LONP1	-0.710291	0.0176699
EIF2B5	-0.710186	2.40465e-05
APMAP	-0.7101	0.00836853
ARMC1	-0.7096	0.0473702
RBFA	-0.709394	0.00883853
ESYT2	-0.70898	0.0011687
MAP1S	-0.707786	0.00288712
NAA60	-0.707784	0.0255637
WDTC1	-0.70766	0.00580612
DUSP11	-0.707465	0.00566918
TSC22D2	-0.707438	0.00111874
COPE	-0.707369	0.00544084
ABRACL	-0.707337	0.0129162
SP2	-0.70725	0.0086741
MAPK1	-0.706966	0.0123892
RASSF1	-0.706735	0.0409733
MAP2K1	-0.706549	0.0332236
BLVRA	-0.706285	0.00525664
SNRNP25	-0.705806	0.0213862
CSNK1D	-0.705795	0.000320047
CFAP20	-0.705619	0.035943
EXOSC1	-0.705508	0.0197379
CRYGS	-0.705093	0.0397388
WBP2	-0.704885	0.0144187
PATL1	-0.704749	0.000231381
COPS3	-0.704413	0.00482387
ARL2BP	-0.704326	0.026447
HNRNPR	-0.703837	0.0134642
USP24	-0.703341	0.00954001
TPGS2	-0.703155	0.00329087
TNFRSF1A	-0.702615	0.0111265
SRA1	-0.702549	0.00668742
SPIRE2	-0.702425	0.0291656
COG6	-0.702045	0.00344102
MGAT1	-0.702044	0.00174496
DIABLO	-0.701753	0.0312858
HDHD5	-0.701745	0.0105896
ALG11	-0.701696	0.0175591
METTL16	-0.700997	0.024427
SLC52A2	-0.700446	0.0242775
MAPKAPK3	-0.700354	0.00244625
PPIA	-0.700224	0.000856175
TUBGCP3	-0.700067	0.00107855
SLC37A3	-0.699714	0.00204534
TGFBRAP1	-0.699434	1.20642e-05
KLF10	-0.699365	0.022298
QTRT2	-0.698836	0.0446226
E2F5	-0.69841	0.0129372
CMTM6	-0.698068	0.0091621
PQBP1	-0.697953	0.00856044
ZNF318	-0.697878	8.72152e-07
USP31	-0.697819	0.0321177
CLINT1	-0.697039	0.00563997
VPS72	-0.696899	0.00400167
AP3D1	-0.69632	0.000336033
DHX37	-0.696052	0.00464876
MED30	-0.695845	0.00627129
PRRC2A	-0.695333	0.000713635
ERH	-0.694933	0.0085896
SNAPC5	-0.694366	0.0076214
FBXW11	-0.694288	0.0184376
HIVEP1	-0.69401	0.0201842
RRN3	-0.693894	0.0135648
TTC37	-0.693803	0.0292084
PPP1R18	-0.693477	0.0284951
SNX8	-0.693274	0.0476672
GPT2	-0.692313	0.0428516
TMCO1	-0.692223	0.0494668
NAA20	-0.691626	0.00479035
AK2	-0.691255	0.00416193
NEPRO	-0.691142	0.0312019
ZFYVE26	-0.690745	4.29212e-05
PDCD7	-0.690334	0.00230266
IWS1	-0.688721	0.00852217
RBM42	-0.688636	0.00288712
ABHD17A	-0.688017	0.030178
RAB3GAP1	-0.687989	0.00228658
ZBTB49	-0.687786	0.0218574
FAM91A1	-0.687598	0.026661
STOML2	-0.687228	0.00657717
ITPRIPL1	-0.687105	0.0375412
PYCR2	-0.686869	0.0161906
TUT1	-0.68658	0.0133949
CLCN6	-0.686482	0.0138872
TMF1	-0.686392	0.000916643
RIOK2	-0.686376	0.025148
MEGF9	-0.686191	0.00126279
NOL10	-0.685861	0.0117457
OTUD6B	-0.685851	0.0344904
SYTL2	-0.685696	0.0364817
RNF126	-0.685065	0.022587
TMEM167A	-0.685063	1.06213e-05
BET1L	-0.684857	0.0088375
ZC3H18	-0.684711	0.000120229
GCN1	-0.684451	0.00270314
MTX1	-0.684336	0.0105715
CHMP2A	-0.684261	0.00878332
MRPL58	-0.683671	0.0157031
FAM50A	-0.683455	6.69713e-05
THUMPD3	-0.683277	0.0140934
GPAT4	-0.683091	0.0253912
CBL	-0.682969	0.0385391
DPM1	-0.682877	0.0440406
AAR2	-0.682806	0.0433051
MFSD5	-0.682789	0.0276679
NT5DC2	-0.68276	0.030133
KLF16	-0.682309	0.00103126
CCDC97	-0.681918	0.00684236
LYAR	-0.681879	0.0240433
WDR55	-0.681632	0.000939989
DDX55	-0.681522	0.01809
CIB1	-0.681211	0.00334383
TBKBP1	-0.680724	0.0034493
SHC1	-0.680362	0.00214952
GNA11	-0.679836	0.0025057
STAM	-0.679727	0.0160605
ADPGK	-0.679482	0.00470431
PPIP5K1	-0.67941	0.0157021
ACTR3	-0.6794	0.00290692
PLEKHA3	-0.679027	0.00141309
FAM110C	-0.678692	0.0386154
DOP1B	-0.677917	0.0282308
NQO2	-0.677796	0.00269683
PLEKHJ1	-0.677567	0.0154693
BICD2	-0.67753	6.7159e-07
MTHFD1	-0.677512	0.0221665
C2CD2	-0.677437	0.0040835
STK26	-0.677188	0.0368056
AKIRIN2	-0.67703	0.0308637
ZMAT2	-0.676589	0.0421164
CABIN1	-0.676292	0.0428516
TRMT112	-0.676247	0.0357627
ZNF146	-0.676076	0.00913816
TPP2	-0.675823	0.00600543
NUP205	-0.675797	0.0311827
FUS	-0.675731	8.10569e-05
ZDHHC5	-0.675619	0.00319156
G3BP1	-0.675184	0.00145878
POLR1A	-0.674873	0.000700256
MIDN	-0.674801	0.00852217
TEX264	-0.67476	0.00710282
ZBTB41	-0.674655	0.00757379
DLL1	-0.674456	0.0401524
RIC8B	-0.674394	0.0340093
ZBTB39	-0.674263	0.000598404
NCOA1	-0.674254	0.00189777
CLNS1A	-0.674191	0.0177501
UBQLN1	-0.674083	0.0487037
NAB2	-0.673195	0.0486114
CERK	-0.673176	0.033557
DVL1	-0.673024	0.00487388
TRAPPC3	-0.672442	0.0108845
HNRNPA3	-0.672231	6.56144e-05
GPD1L	-0.671645	0.0116348
WDR18	-0.671535	0.00821869
DCAF1	-0.671168	6.56144e-05
TSG101	-0.671036	0.0179891
DHX34	-0.670935	0.0174165
CEBPZ	-0.670739	0.0225338
FNTB	-0.670432	0.0231957
ACBD6	-0.670429	0.00232519
FLI1	-0.670359	0.0212214
CLPP	-0.670146	0.0186943
TRAPPC10	-0.670062	0.00377742
EDF1	-0.669554	0.0193548
AFDN	-0.669432	0.000475727
RNF216	-0.669024	0.00145878
SELENOT	-0.668537	0.0186271
NOC3L	-0.66806	0.0195209
NR2F6	-0.667637	0.00125153
RHBDD1	-0.667474	0.00258084
AP1G1	-0.667428	0.000988193
GMDS	-0.667397	0.0232573
SSNA1	-0.667214	0.0346271
BLCAP	-0.667107	0.0120341
PRMT7	-0.666645	0.00327349
DGKQ	-0.666343	0.0182649
YIPF4	-0.66619	0.0321355
E2F6	-0.666003	0.0138526
UBAP2L	-0.665701	5.85565e-07
DHDDS	-0.665645	0.00394093
RASSF3	-0.66562	0.00260851
SNRNP40	-0.665332	0.0141451
PITPNC1	-0.665259	0.0298333
SNTB1	-0.664739	0.0282209
NUP62	-0.664651	0.0161906
SLC38A7	-0.664374	0.00815424
MAP2K4	-0.664184	0.00153116
WDR26	-0.663909	0.00130273
CAPN7	-0.663732	0.00374038
POLR2I	-0.66362	0.0216023
DHX38	-0.66251	0.00163652
CXXC5	-0.662406	0.0376598
SELENOF	-0.662005	0.0208997
UHRF1BP1	-0.661815	0.00580863
SDCBP	-0.661734	0.00745476
AFTPH	-0.661109	0.000443433
TMEM18	-0.660997	0.0110153
COPS6	-0.660887	0.0188756
SPCS1	-0.659669	0.021876
TRIM35	-0.659553	0.00833256
MDM2	-0.659515	0.0232344
ETFB	-0.659295	0.0100791
MLLT1	-0.659027	0.00953084
WDR33	-0.658994	1.22191e-05
COLGALT1	-0.658871	0.00979423
IPPK	-0.658846	0.0242311
TULP4	-0.658326	0.0165982
NAA25	-0.657989	0.0184793
UBC	-0.657933	0.0403492
TFDP1	-0.657833	0.0133616
PLGRKT	-0.657561	0.0408536
NOL11	-0.657381	0.00519967
KIAA1191	-0.657294	0.00357774
PIGW	-0.657162	0.00747281
EBNA1BP2	-0.656843	0.00397623
DTX2	-0.656722	0.0161742
ATP6V1D	-0.656525	0.015874
[truncated: 470 more rows]

## Sheet: TH atemp UP
Gene	log2FoldChange	FDR
CYP1A1	6.44166	1.57572e-06
GLYAT	6.0716	0.00324421
PCLAF	5.34012	0.000333064
FOXM1	5.14559	0.000393476
CXCL10	4.99987	0.000511768
AURKB	4.85404	2.67911e-05
IFI6	4.82267	1.00032e-13
ABCC8	4.13017	0.000347028
BCL11B	4.12121	0.00751062
PCK1	3.9983	0.00673663
CD8B	3.84978	0.0301161
CEP55	3.79458	0.000427044
ISG15	3.72801	0.002569
MX1	3.719	0.00318699
KIF4A	3.66083	0.000830312
CD22	3.54127	0.00240458
KIF18B	3.43153	0.00115561
IFIT1	3.38369	0.000227782
CDCA8	3.37183	0.00776755
MKI67	3.33197	6.44549e-05
ASPM	3.29618	0.00362969
IKZF3	3.28333	0.0198041
TCF7	3.26657	0.0351818
DPEP3	3.25884	3.68479e-05
IQGAP3	3.25382	0.00324421
AQP7	3.25214	0.0147739
TROAP	3.24681	0.00150162
FNDC9	3.22251	0.00136513
FCGR3A	3.18675	1.86087e-06
CD1E	3.15739	0.0288087
TNFRSF18	3.09268	0.0229544
CD3D	3.06424	0.0362311
CENPE	3.0637	0.00236859
C3AR1	3.00611	0.00032303
PLAC8	2.97692	0.0105191
ADIPOQ	2.95723	0.0204263
TOP2A	2.91552	2.46487e-05
RXRG	2.90973	0.00562467
FAM155A	2.90126	0.0165508
NDC80	2.89684	0.00173692
PI16	2.88694	0.0391857
E2F2	2.82	0.0154085
SCN7A	2.77978	0.00799725
COL1A2	2.77562	0.00549555
BUB1	2.77552	3.43956e-05
SERPINF1	2.77506	0.000249745
TRARG1	2.77153	0.0084688
CENPA	2.76859	0.00112807
CENPF	2.76549	0.00176901
HERC6	2.75842	0.0403417
RTP4	2.7412	0.00236357
DEPDC1	2.6853	0.0255362
NEK2	2.66911	0.0235947
UBE2C	2.66753	0.00108164
COL23A1	2.63662	6.47655e-10
CD55	2.63131	4.76373e-05
EPSTI1	2.62675	0.000355576
COL1A1	2.61866	0.00707466
FYB1	2.61856	0.00354728
CACNG7	2.61667	0.0141874
MXRA5	2.5982	0.00262699
RBP4	2.57047	0.000427404
SHANK1	2.5641	0.0179624
CCDC190	2.54998	0.000511768
MTUS2	2.54997	0.0102326
ZBP1	2.53681	0.00660899
SLAMF7	2.53182	0.0105417
CD2	2.46667	0.00281232
TMBIM7P	2.4539	0.00192199
PAPLN	2.45006	0.00137562
PVRIG	2.436	0.0345213
CD74	2.41162	0.000355774
LY86	2.40689	0.00520303
KCNJ12	2.39717	0.0411127
SRGAP3	2.39348	0.000225803
SFRP4	2.37262	0.00110431
LY75	2.36194	0.0395408
GPBAR1	2.34103	0.00257075
C1QC	2.33858	3.30213e-06
LUM	2.32903	0.00153442
C2	2.30341	0.00424339
IL20RA	2.2989	0.0249214
NALCN	2.27952	0.0311785
PKIB	2.2693	0.0254829
TBX1	2.25042	0.0440636
DDX58	2.24488	0.00874055
SSC4D	2.23548	0.0442847
NDNF	2.23405	0.0352947
RAB36	2.22978	0.0495461
DPEP2	2.21071	0.00107983
FAM83E	2.21004	0.0148581
C1QA	2.1934	8.13881e-06
MAP2K6	2.18837	0.000614202
KIF15	2.18833	0.00562467
COL3A1	2.18159	0.00169823
RTKN2	2.17937	0.032061
ASTN1	2.16036	0.0457616
WDR64	2.15951	0.00729103
GATA3	2.13991	0.0475674
CDC20	2.13524	0.0150842
ANGPTL1	2.12729	5.67128e-05
GRAP2	2.12661	0.0337382
CPZ	2.10921	0.00149249
MS4A7	2.09947	0.0406126
RNASE6	2.08388	1.99705e-05
PDGFRL	2.06251	0.00453631
PLP1	2.05973	3.66478e-05
DGAT2	2.03936	0.0220806
C1S	2.02697	9.57225e-10
ARHGAP33	2.02178	0.00158032
MEI1	1.99849	0.0145378
UROC1	1.9966	1.1689e-07
CLSTN3	1.99486	0.00633388
BIRC5	1.9942	0.0229029
PLXDC1	1.98925	0.0112355
PDCD1LG2	1.98864	0.0226209
KNTC1	1.97656	0.000876527
IFI44L	1.97557	0.00262221
PLBD1	1.97079	0.00019599
ASB9	1.96408	0.00839177
ALDH1L2	1.96324	0.00206851
SIGLEC11	1.95049	0.0219698
CIDEC	1.941	0.0162148
CDC6	1.93621	0.0212722
UHRF1	1.92266	0.00949335
ROBO2	1.91308	0.000243827
GRIA4	1.91124	0.0238311
TAFA3	1.90713	0.00689985
RRM2	1.89925	0.034367
FGD2	1.89553	0.000342701
KIFC1	1.88046	0.00044962
MPZ	1.86804	0.000220609
IFI44	1.85625	0.012481
CIT	1.8475	0.00325441
XAF1	1.8335	0.0259952
ARL14EPL	1.8243	0.0160992
SLC1A3	1.8189	0.0490254
G0S2	1.81722	0.0210758
LGALS1	1.81114	0.00882015
TMOD2	1.80693	0.0157515
SELENBP1	1.78614	0.000586511
AK5	1.78255	0.000844479
PPFIA3	1.77804	0.00171847
SSC5D	1.76933	0.00666637
RINL	1.76392	0.0173538
EVPL	1.76064	0.0456141
GDA	1.75791	0.0298246
DPYSL3	1.75757	0.00484261
EFS	1.75442	0.000263267
MFAP4	1.75158	0.000419057
KIF22	1.74456	0.0284208
CIITA	1.74328	0.00336866
CA11	1.73007	0.00207237
FAP	1.72822	0.00909852
FAT3	1.71522	0.00697613
TRIM7	1.70679	0.00769311
EML6	1.70073	0.00259943
SCIN	1.70052	0.0129605
TPPP2	1.6973	0.000215098
ADAM33	1.6928	0.000199039
PITPNM3	1.69061	0.00464152
ZGRF1	1.66035	4.18907e-05
PTGES	1.65957	0.00590566
GJC3	1.65368	0.0153403
SLC37A2	1.65239	0.00475582
ZMAT1	1.64954	7.44114e-05
EFCAB5	1.64882	0.00909372
STMN1	1.64715	0.00308995
FMOD	1.64522	0.00830552
LPXN	1.64459	0.00113564
CFAP70	1.63741	0.00132129
DCN	1.63719	0.0014692
ABCA6	1.63173	0.00127758
NTRK2	1.62915	0.00777719
HNMT	1.62242	0.0111422
FAM221B	1.61384	7.81967e-05
DHX58	1.61164	0.0307105
RTN4RL1	1.60589	0.000270259
CKAP2L	1.60473	0.0177407
C1R	1.58648	0.000317367
HOXA2	1.5654	0.0216253
RNF207	1.55982	0.00765049
PRELP	1.55354	1.10132e-05
POLE	1.54887	0.00339563
CNTN1	1.54266	0.00755653
ADAM23	1.5394	0.0120505
MXD3	1.53912	0.011916
MILR1	1.53462	0.0183329
ATP8B3	1.53417	0.00360683
PTGR1	1.52857	0.00054971
RAC2	1.52517	0.0278501
WNK4	1.52347	0.00182358
GPRIN1	1.51643	0.0232785
AZIN2	1.51541	0.0343499
SNCAIP	1.5099	0.0164143
SCN8A	1.50865	0.0278031
COL4A6	1.50132	5.96451e-05
YPEL1	1.49774	2.91111e-06
COL7A1	1.48869	0.000391082
ITPKA	1.48145	0.00752451
NNMT	1.47714	0.0389562
A1BG	1.47368	0.0157035
LTB	1.47175	0.00257075
ANGPT4	1.47116	0.000334623
COL16A1	1.46825	0.00147103
NCKAP1L	1.46728	0.0224376
MAMDC2	1.46686	0.0482727
SARDH	1.46667	0.0396976
IGF1	1.46524	0.00129432
RECQL4	1.46232	0.0106674
PARVG	1.45982	0.0093511
GLT8D2	1.45824	0.00742523
PSD	1.44483	0.0475728
DLGAP1	1.44448	0.0319034
MYOC	1.44366	0.000525271
AIF1	1.43567	0.000118816
TRPM4	1.42834	0.00756882
DDAH2	1.42696	8.57624e-09
TSKS	1.42663	0.0256425
MUC20	1.42515	0.0243216
GPR19	1.42312	0.0138999
ARHGAP15	1.42245	0.0302304
SIT1	1.42074	0.00363189
MDK	1.41668	0.000467679
HPGD	1.4131	0.0218625
KIF20A	1.4111	0.0254283
XPNPEP2	1.41044	1.8622e-06
SLC9A9	1.40715	0.0141886
NLRP1	1.40639	0.0182913
POMC	1.40609	0.0480133
TSPAN11	1.40058	0.00577417
SLITRK5	1.40034	0.0104691
CORO2A	1.38397	0.00775775
TCN1	1.37839	0.0119955
MAST1	1.3773	0.0223055
DAB1	1.37276	0.0202255
IL2RG	1.36383	0.0493952
MFSD4A	1.36127	0.00696795
DMXL2	1.36095	0.0450051
CCDC80	1.35764	0.00714701
APBB1IP	1.35119	0.0370313
SNCA	1.35084	0.0490359
MXRA8	1.34432	5.40532e-06
ATP8A1	1.34356	0.00616732
DDX4	1.34247	0.00191619
OTOGL	1.33767	0.0298355
CCDC40	1.33739	0.0493952
CCDC3	1.33451	0.0113505
DBP	1.31985	0.000936837
LYPD6	1.31855	0.0148161
NOVA1	1.30734	0.0229727
MASP1	1.30493	0.0257132
ANKRD33	1.30393	0.0438634
ABI3BP	1.30108	0.0204435
LGALS4	1.29141	0.000481194
FBLN1	1.29124	0.0394674
EPB41L5	1.2898	0.00225161
TNFAIP8L2	1.28333	0.0140768
KLF12	1.2819	0.0156481
EVI2B	1.27357	0.0285384
TREX2	1.27012	0.000652259
HCST	1.25593	0.0226209
ESPL1	1.24901	0.00747532
GHSR	1.24793	0.0474269
MPEG1	1.24733	0.00776053
ASPA	1.24661	0.0462023
RNF213	1.24435	0.0499329
RASSF4	1.24203	0.000945586
CENPT	1.24128	0.0207671
ARHGEF39	1.22348	0.00142507
ORC1	1.21991	0.0277402
PRTFDC1	1.20976	0.00275979
MMP23B	1.20769	0.00697613
OPRL1	1.20545	0.0022274
ZDHHC1	1.19956	0.0438819
SIGLEC1	1.19796	0.0178116
C7	1.19722	0.00943511
CHTF18	1.19204	0.000218277
LAT2	1.19186	0.0139549
WAS	1.19122	0.0390244
RFTN2	1.19044	0.00507231
RIPPLY3	1.18656	0.0377142
MYCBPAP	1.18098	0.00150162
LOXL3	1.17531	0.00788816
PAQR5	1.17239	0.027767
BFSP1	1.16856	0.00428494
SRPX	1.16609	0.0222196
STARD6	1.1643	0.0451921
ACSM3	1.16122	0.00565563
IMPA2	1.15945	0.0276185
GHDC	1.15788	0.0347854
FKBP10	1.14986	0.0183652
NFAM1	1.14754	0.045855
SEMA3B	1.14124	0.0259535
VSIG10	1.13207	0.0198058
CACNA1D	1.13074	0.0355757
PTGDS	1.12499	0.00389819
CDKN1C	1.12336	0.00905905
POLQ	1.12061	0.00343386
PSTPIP1	1.11829	0.0479705
ARHGAP30	1.11409	0.00230654
ZFPM2	1.10353	0.00479168
RAB3B	1.10225	0.00927684
LRRC31	1.09558	0.0472253
PDE9A	1.09002	0.000277436
RNF150	1.08984	0.000769935
SPEF1	1.08816	0.0318536
CLIP3	1.08732	0.0195294
FBLN2	1.08573	0.0482821
CCDC15	1.08186	2.27513e-05
RAD54L	1.08076	0.000593317
SPI1	1.07417	0.0184055
ANKRD35	1.06968	0.0473319
GEN1	1.06937	0.000327912
CPE	1.06729	0.0495461
BGN	1.06699	0.0280074
OAZ3	1.05775	0.0336115
SYNGR3	1.05414	0.00650659
THY1	1.04168	0.0267436
PRC1	1.0366	0.0426472
CACNA1A	1.03638	0.0436082
BASP1	1.03406	0.0297967
BOC	1.02692	0.00995914
LRRC4	1.02355	0.0495797
REPS2	1.02094	0.0206174
SLC2A11	1.01734	0.0107655
FIBIN	1.00883	0.0135321
KISS1R	1.00628	0.0377943
PORCN	1.00625	0.0384051
TLR1	1.00265	0.0202038
AGRN	1.00152	0.000429328
KNSTRN	0.999087	7.63471e-08
SLIT2	0.997224	0.0378364
FRMPD1	0.994842	0.047882
SORL1	0.975567	0.0274662
OLFML1	0.971855	0.0231239
CCDC171	0.965665	0.0432529
CLEC11A	0.963619	0.00370975
ABCG2	0.961857	0.00302925
TIMELESS	0.961402	0.00656848
COL4A5	0.959312	0.000646
PLCD3	0.95898	0.0177514
ABHD1	0.95596	0.0138392
C1QTNF7	0.949967	0.037086
CSF1R	0.949316	0.00696256
COLEC12	0.947406	0.0250371
NAPSA	0.944537	0.0132206
HCAR2	0.944265	0.0301351
SARM1	0.936671	0.0232579
PPFIA4	0.935605	0.0427622
EPS8L2	0.935555	0.0185053
ADHFE1	0.933801	0.0050428
EFCAB7	0.932566	0.00125903
AGER	0.931696	0.025786
C1QTNF1	0.931635	0.0412531
ATP6V0E2	0.930517	0.0277783
SPAG8	0.930484	0.023024
SLC25A27	0.928587	0.0274825
HYKK	0.926972	0.0256333
TYROBP	0.926956	0.029952
ZBTB20	0.924793	0.0226483
NADSYN1	0.921004	0.0464768
CA9	0.917236	0.0205531
SEMA4F	0.915803	0.0171603
C5AR1	0.914893	0.0252783
DTL	0.913577	0.0125577
ECM2	0.91232	0.0452261
SLC22A17	0.911742	0.0415821
TRERF1	0.908965	0.00748048
TRIM9	0.907755	0.00544077
CENPW	0.907328	0.0220641
ARHGEF25	0.899603	0.00242137
AMT	0.893148	0.00220009
SMPD5	0.889196	0.0394464
MAP1B	0.886328	0.0297967
KCTD6	0.884207	0.00735422
CDH15	0.881667	0.00265132
ZNF277	0.878085	0.0348956
CERCAM	0.876722	0.0478548
ZSWIM7	0.875593	0.000767027
OLFML3	0.875178	0.0105666
MYBL2	0.870665	0.00321951
SGCE	0.866344	0.0494208
SYCE2	0.858582	0.0179624
EFCC1	0.853033	0.0373616
SOX12	0.852964	0.0107762
TSHZ2	0.852795	0.0385095
ACAP1	0.841924	0.00815042
FCER1G	0.836796	0.019529
CENPQ	0.836614	0.00117645
ZNF470	0.835026	0.0396341
WDR35	0.827076	0.0425544
OGN	0.826942	0.0236718
NCKAP5L	0.824274	0.00098585
CEP72	0.823772	0.0408438
CCDC18	0.817465	0.0263029
PNPLA7	0.813735	0.0263188
COL11A2	0.811432	0.0349797
FAH	0.804846	0.00367369
EDNRA	0.798852	0.0228961
HOXD3	0.796234	0.04765
SAP25	0.792455	0.0427729
ARRB2	0.78504	0.00291416
FMNL2	0.76946	0.0232494
DDO	0.760212	0.0148694
NAAA	0.758352	0.0243358
CCDC158	0.757965	0.000604959
LIX1L	0.754455	0.0119955
TWIST1	0.753647	0.0111071
TMEM88	0.743654	0.0394629
TCTN2	0.740071	0.0395945
JAML	0.738922	0.00429734
RPGRIP1L	0.738244	0.0407384
ZC3H6	0.737649	0.00248418
CNTNAP1	0.728026	0.0379836
ZNF790	0.7226	0.0489211
ATRNL1	0.722441	0.0383814
FGF11	0.717897	0.0105188
WDR38	0.715524	0.0462117
ZNF618	0.71517	0.0300061
TENT5B	0.708794	0.0119955
EVC	0.700437	0.0232785
UNC119	0.696393	0.0383938
PIK3IP1	0.680918	0.0267467
SSBP3	0.676831	0.00365122
XPO1	0.67676	0.00953377
MYL9	0.674142	0.00363248
CASKIN1	0.67261	0.0216068
WDR6	0.669142	0.0302465
IGSF8	0.656704	0.0255488
SESN3	0.636682	0.0228519
HSPB11	0.633934	0.0107659
NPNT	0.621236	0.0143716
CPLANE2	0.608095	0.0397872
CCDC14	0.607774	0.0288976
PSIP1	0.602664	0.0150258
RUNX1T1	0.600504	0.0486161
ODF2L	0.598359	0.0408438
NPHP1	0.582691	0.0239989
ULK2	0.569693	0.0486978
ERMARD	0.550977	0.0290127

## Sheet: TH atemp DOWN
Gene	log2FoldChange	FDR
SLC14A2	-4.74148	2.9202e-05
DNAH1	-4.63802	4.56285e-05
DNASE1	-4.48375	1.57262e-05
RFX4	-3.60456	0.000937726
KCNQ3	-3.49124	5.40532e-06
UPP1	-3.40239	4.31638e-07
ANOS1	-3.40084	1.83118e-11
SFRP5	-3.39428	0.00309286
ADM2	-3.27853	0.000156042
GPX2	-3.19369	0.000704606
UBE2QL1	-3.18454	1.9475e-06
SDF2L1	-3.14725	0.000193841
OTUD1	-3.05996	7.52538e-05
MLPH	-3.05284	0.0145038
SYTL5	-2.89567	0.00395974
CALB2	-2.87178	0.0322088
FTL	-2.8686	1.20495e-29
ID1	-2.80078	2.31072e-08
CRELD2	-2.79546	0.000598436
TMEM72	-2.7912	3.69444e-05
PTX3	-2.78332	0.00252767
TCP11	-2.77677	2.8652e-08
HSPA5	-2.73676	1.06475e-05
MANF	-2.7365	3.06049e-06
SLCO4A1	-2.68443	0.00488863
RUNX1	-2.61257	0.00198211
BMP6	-2.59731	4.04733e-07
SLC17A9	-2.5103	5.98316e-07
CXCL16	-2.50715	1.47478e-11
HYOU1	-2.4936	9.0224e-06
PCP2	-2.46218	0.00594893
SLC5A5	-2.45574	0.0294386
CRB2	-2.44348	0.0336429
ZFP42	-2.4361	0.0417422
KCNE3	-2.43258	0.0103333
LRRC6	-2.4235	0.00975174
RCAN1	-2.41516	9.05121e-05
MAFF	-2.40529	3.91586e-11
KCNQ1	-2.38424	6.18646e-06
TENM4	-2.36014	7.19062e-05
NPR3	-2.35831	6.00602e-06
EVL	-2.3536	6.32848e-06
EMB	-2.34994	0.0315798
SH2D5	-2.3339	0.0183663
POU2AF1	-2.31583	0.00392946
FRMD1	-2.30408	0.0129605
FABP3	-2.28943	9.50639e-09
NGB	-2.28782	1.28286e-05
RASD1	-2.26011	0.000964425
KCNJ1	-2.2569	6.62181e-05
PRIMA1	-2.22813	0.00128475
AMN	-2.21625	0.00897897
NOS2	-2.216	1.52231e-06
PDIA4	-2.21211	1.38157e-06
CHST3	-2.18319	0.000266849
DUSP5	-2.18106	0.000186608
AQP1	-2.17089	0.00412089
ID3	-2.16193	2.35537e-06
ENAH	-2.15981	1.58309e-05
STRA6	-2.15669	0.000285943
FICD	-2.13409	5.58826e-05
TIMP2	-2.13009	0.000458489
OSGIN1	-2.12998	4.9488e-10
HSP90B1	-2.1297	9.47349e-06
SIK1	-2.11336	2.01328e-07
RND1	-2.09601	0.00135547
PJA1	-2.08955	1.35652e-05
NPM3	-2.08781	0.000629315
PRTG	-2.08071	6.44549e-05
RFLNB	-2.0643	0.00376094
VNN1	-2.05311	0.00622839
CCDC151	-2.05294	0.00525688
ATF3	-2.0502	0.0174235
KIF26B	-2.04395	0.00169664
HMOX1	-2.03056	0.00578747
SLC7A6	-2.02963	2.27273e-05
RGS6	-2.01497	4.11317e-05
LPCAT3	-1.99888	1.08526e-05
SDSL	-1.99172	0.00119795
CALR	-1.98414	5.62554e-05
DNAJB9	-1.98274	3.42575e-07
DERL3	-1.97144	0.00161233
SLC2A10	-1.97108	0.000914639
EPOP	-1.97097	0.00109243
HERPUD1	-1.95898	6.49151e-10
SRXN1	-1.95808	5.94421e-08
NQO1	-1.95532	2.08154e-06
GAL	-1.95409	0.00453652
ESM1	-1.95355	0.0312329
LPIN1	-1.94881	0.00804559
ACSS1	-1.94567	7.45198e-05
CDR2	-1.92519	6.46022e-06
PPIF	-1.91888	0.0022153
THBS1	-1.91836	0.000480862
LRP8	-1.91028	8.1457e-05
KCNJ15	-1.90563	0.0104834
TGFBI	-1.89834	0.00415163
PDIA6	-1.8942	6.86999e-06
GSR	-1.88724	1.12008e-05
DNAJB11	-1.88307	1.01974e-05
IGF2R	-1.87987	1.4217e-10
CTSH	-1.87761	1.1689e-07
KRT18	-1.87684	1.01848e-07
ELOVL2	-1.87553	0.00711221
CREB3L1	-1.87307	1.32547e-08
BLVRB	-1.8727	3.47322e-06
LRRC59	-1.86779	9.65201e-08
AKAP12	-1.86776	1.85803e-06
SOCS3	-1.85434	0.000105255
ARHGAP22	-1.85174	0.0247871
TAF4B	-1.85094	0.00104158
ABCC3	-1.85007	1.18176e-05
IRS1	-1.83868	0.00214114
IDH1	-1.8234	5.46385e-08
ALG5	-1.81494	1.02272e-07
TRAF3	-1.81473	3.13773e-05
S100A1	-1.81194	0.00187511
A3GALT2	-1.80596	0.0117888
ARSB	-1.80139	0.000164893
ACKR1	-1.79657	0.00106277
CSTA	-1.79054	0.0143473
DNAJC3	-1.78242	4.96764e-07
RRS1	-1.77736	0.000928273
NMB	-1.77651	0.00153442
SEC24D	-1.77477	5.4516e-09
MCAM	-1.77399	4.42075e-05
AEN	-1.77084	0.00433652
LONRF3	-1.76987	1.57572e-06
POLR3G	-1.76408	0.00259746
RHBDL2	-1.76136	0.000516623
SLX4	-1.76035	0.00100782
ME1	-1.75991	0.00725811
HSPA1A	-1.75744	0.00260266
IER5	-1.75437	4.08081e-07
EHD3	-1.74668	1.70311e-08
SLC39A4	-1.74213	0.0426472
GJB1	-1.74172	4.30989e-05
RUBCNL	-1.73797	0.0123747
MICAL2	-1.7357	0.00598374
ADAMTS4	-1.73412	9.31638e-05
DGKI	-1.73052	0.0224376
SEMA3F	-1.72567	2.3473e-07
SRPRB	-1.72477	2.7141e-07
ACSBG1	-1.71901	0.0251809
PLIN2	-1.71551	0.000382747
ATP7B	-1.7094	0.000356788
ISLR2	-1.70671	0.0416782
CACNA1H	-1.70552	0.00158734
METTL1	-1.69161	9.18579e-11
UNC5B	-1.68287	1.52231e-06
POMT2	-1.67714	1.18308e-07
TBL2	-1.67143	1.05585e-05
ARID5A	-1.66111	0.000277988
CNDP2	-1.65746	3.88456e-06
WFDC1	-1.65421	0.000179412
CD93	-1.64897	0.00688345
NPC1	-1.64307	0.000542306
LRRC3	-1.64295	0.00541242
SLC33A1	-1.64252	3.38974e-07
SLC7A1	-1.64039	0.0152574
FAM107A	-1.64023	1.70743e-05
CDK2AP2	-1.62945	0.000327394
ALDH1A3	-1.62658	3.06238e-05
MAGEE2	-1.62552	6.18646e-06
SLC25A20	-1.62395	0.00217673
RRP12	-1.62166	1.10252e-05
TTPAL	-1.6185	9.30398e-08
ENDOD1	-1.61491	3.14786e-06
PDIA3	-1.61367	1.92248e-05
RENBP	-1.61363	0.000166127
ATP1B3	-1.61334	7.07555e-10
GMPPB	-1.61292	0.000919592
PNLDC1	-1.61259	0.0100368
HDAC4	-1.60553	0.000273377
GNMT	-1.60404	0.00045035
NAGLU	-1.59998	6.86999e-06
KCNK1	-1.59549	0.000102899
APOLD1	-1.59376	0.000111319
GLUL	-1.59164	0.00180655
TIMM8A	-1.59129	0.00355284
IRS2	-1.59126	6.18646e-06
ROBO4	-1.5903	4.05544e-06
PPRC1	-1.58708	1.57262e-05
NUPR1	-1.58264	0.00220027
CCDC134	-1.58232	0.000389424
SLC12A8	-1.5822	0.00522234
SELENOS	-1.5779	4.51516e-11
FHDC1	-1.57567	0.011474
ADAMTS1	-1.57189	1.86087e-06
HES2	-1.5702	0.000109314
PGLYRP4	-1.5616	0.0467049
CTH	-1.56022	0.00860368
STAC	-1.55917	0.00115579
CSRNP1	-1.55594	9.10829e-06
GAR1	-1.5559	2.43143e-11
SLC39A7	-1.55444	4.03578e-09
HCRTR1	-1.55285	0.0110746
HSPH1	-1.55235	8.6812e-05
ZDHHC20	-1.55094	1.86087e-06
SH3BP5	-1.54584	0.000685207
PXDN	-1.53659	5.2728e-05
PSAPL1	-1.53323	0.0420262
RELT	-1.53203	0.0223798
GPC4	-1.53112	0.000117341
XBP1	-1.52944	2.6631e-05
STC1	-1.52841	2.30584e-08
SLC2A8	-1.52626	2.90907e-06
KRT8	-1.52272	6.75441e-05
LOXL4	-1.52245	0.0280142
SPRY4	-1.5214	0.000437398
PNO1	-1.51898	0.00640261
CD40	-1.51783	0.00112648
SLC22A15	-1.51733	0.00152394
CCT6A	-1.51621	0.000314246
LRRC8C	-1.51601	0.0110835
MPV17L2	-1.51212	0.00881626
P4HB	-1.51192	1.75808e-05
MAP3K8	-1.51161	0.0440323
SEC11C	-1.50573	0.000285496
CYHR1	-1.50533	9.72896e-05
SPX	-1.5041	0.0184198
ADCY5	-1.50343	0.0477469
SURF4	-1.50162	3.43533e-05
ANKRD33B	-1.50057	0.0012091
CYSLTR2	-1.49556	7.7957e-05
SLC44A4	-1.49349	0.00803515
CHSY1	-1.49333	0.000870517
STRIP1	-1.48502	1.3857e-06
ODC1	-1.48391	7.45198e-05
FNDC1	-1.48299	0.000314246
CDS1	-1.4815	0.00647163
CD9	-1.47613	0.000503554
PGAM1	-1.47154	5.04324e-08
HSD17B1	-1.46933	0.0022506
GOLGA4	-1.469	1.35082e-06
CANX	-1.46477	2.28057e-05
CX3CL1	-1.4629	0.00215043
KIFC2	-1.46155	0.0150134
THBD	-1.46095	0.0017329
ARF4	-1.45996	0.000256466
TMED9	-1.45861	4.99526e-06
NOS3	-1.45682	1.02635e-05
YRDC	-1.45579	5.05541e-08
SEC61B	-1.45475	2.09723e-07
TMEM50B	-1.45421	3.91586e-11
SLC25A13	-1.45196	0.00084668
UBE2D1	-1.44789	0.040431
SAR1A	-1.44616	1.16324e-11
RFK	-1.4435	8.98837e-17
APCDD1	-1.44299	0.000516623
SLC41A2	-1.44154	0.000646097
PRR15	-1.44114	0.00497359
KIAA0513	-1.4407	1.42363e-05
PRKCA	-1.43727	0.000138412
SPTBN5	-1.43357	0.00130216
SELENOH	-1.43336	6.33201e-07
RAB29	-1.43332	0.00155843
EDNRB	-1.43147	0.000225803
TAFA5	-1.43098	0.00625497
ALYREF	-1.42889	0.00464514
TMEM185B	-1.42783	4.33935e-07
GSTM3	-1.42709	3.54115e-05
SYVN1	-1.42667	0.00119535
CRYL1	-1.42663	0.000478842
NOP14	-1.42619	3.19392e-05
SLC31A1	-1.42522	0.000928273
UFM1	-1.42447	9.96115e-07
MED9	-1.42294	1.71869e-05
RHOBTB2	-1.42166	5.80004e-05
PLAT	-1.4207	0.000466995
C1QTNF5	-1.41999	2.9037e-05
NPL	-1.41987	4.39703e-06
HNRNPAB	-1.41928	4.99526e-06
ZSWIM4	-1.41917	0.000447836
CMTM7	-1.41793	0.00633388
SPON2	-1.41664	0.00333215
VILL	-1.41523	0.0103748
RAB11FIP4	-1.41489	0.00209279
RTL1	-1.41223	0.036725
PAPPA	-1.41127	0.00737885
TACC2	-1.41049	0.00236357
PRELID1	-1.4098	3.05593e-06
SEC22B	-1.40934	4.13155e-08
COPS8	-1.40525	0.000419057
SH2D3C	-1.40381	0.000108349
EAF1	-1.40173	1.03968e-06
AMD1	-1.40019	9.23641e-05
KBTBD11	-1.39935	6.43011e-07
CLIC4	-1.39705	0.000273377
DCTD	-1.39095	1.22804e-06
MFSD6L	-1.39001	0.00041552
NOP16	-1.38987	2.80195e-07
PRDX1	-1.38953	9.66156e-08
BZW1	-1.38508	1.70311e-08
TLN2	-1.38413	0.00274372
ALG2	-1.38264	3.86282e-05
SUCO	-1.38247	4.24284e-05
GPR4	-1.38228	3.85035e-05
BCL6B	-1.38121	5.01441e-05
RASSF2	-1.38075	0.000203189
TP53INP2	-1.38028	0.000201255
KCNK6	-1.38022	0.0020681
UPRT	-1.37834	0.000177769
MRTO4	-1.37747	0.000103692
SLC35A2	-1.37648	9.51749e-06
ABL2	-1.37542	0.00778504
NFASC	-1.37265	0.0497531
GRAMD2A	-1.37169	0.00145132
RPN1	-1.36834	2.35457e-05
ITPR3	-1.36652	0.00310386
SLC6A6	-1.36624	0.00679737
WDR12	-1.36607	0.000279659
ITPRIP	-1.36495	0.000491904
HES4	-1.36466	0.00482237
HSPA6	-1.3645	0.0123956
RNF144B	-1.35859	0.0439737
EEF1AKNMT	-1.35474	1.37303e-06
UGGT1	-1.35446	0.00229295
TMED2	-1.3537	4.50521e-06
SERP1	-1.3522	2.39523e-07
METRNL	-1.35023	0.00809445
KIAA0930	-1.35013	0.00019444
PIP5K1B	-1.34796	0.041104
VWA1	-1.34445	7.63471e-08
KPNA2	-1.34219	0.00128475
SEC23B	-1.34189	1.64054e-05
TXN	-1.34163	0.000523553
SARAF	-1.33941	0.00179525
DAD1	-1.33882	0.000140206
NANS	-1.33844	0.000419057
SMYD5	-1.33623	2.35457e-05
STXBP1	-1.33521	0.00147319
CISD2	-1.33514	6.47655e-10
PSMB5	-1.33478	0.00253199
STT3A	-1.3329	4.26418e-07
SDAD1	-1.3328	1.10252e-05
GTF3C4	-1.32996	0.0368492
EIF4G1	-1.32927	5.96451e-05
PCDH12	-1.32899	0.000919054
G6PD	-1.32895	4.18957e-07
IFRD2	-1.3271	0.00482839
MED10	-1.32522	3.09432e-05
MOGS	-1.32453	3.8042e-06
MYRF	-1.32176	0.0387834
TXNDC5	-1.32079	1.47227e-05
DPP3	-1.32056	0.00764407
RRBP1	-1.32015	0.000413713
TEX2	-1.31974	1.43977e-05
EIF4A1	-1.31836	5.58152e-08
TINAGL1	-1.31387	0.000877921
RNFT1	-1.31312	1.37755e-07
PGM2	-1.31292	3.45542e-08
ZMPSTE24	-1.3121	9.10829e-06
TMBIM4	-1.31033	1.6176e-05
TGM2	-1.30922	0.00908653
SLC41A1	-1.3083	1.12008e-05
SLC35E3	-1.30561	0.00959231
NIPSNAP2	-1.30483	0.0154729
BACH1	-1.29797	5.54022e-10
ARL1	-1.29752	4.32764e-05
MON1A	-1.29733	0.000280328
CRB3	-1.29705	0.00262939
BCL2	-1.29639	0.00494414
LRRC32	-1.29616	0.00102727
PDE1C	-1.2959	0.00010855
ICAM5	-1.29565	0.039975
SH3BP4	-1.29484	0.000226823
SEH1L	-1.29333	0.000337244
ADCK1	-1.29333	0.00424339
HSDL2	-1.29282	0.0136674
HLF	-1.29191	0.040725
ITGB3	-1.28965	0.0101465
TSR1	-1.2893	5.33891e-06
SRPRA	-1.28796	1.74519e-06
ALDH18A1	-1.28778	1.96875e-05
ETF1	-1.28695	0.00040644
KIAA1671	-1.28443	0.00321951
BAX	-1.28304	4.18334e-06
ADSS	-1.28073	4.18957e-07
SLC5A3	-1.28041	0.000189926
ZBTB21	-1.28038	2.80006e-07
TMED10	-1.27815	9.64245e-06
FMNL3	-1.27758	6.43011e-07
HMOX2	-1.27683	0.00997529
NUCB2	-1.27667	0.00156744
SLC38A1	-1.2753	0.000621129
ITGA5	-1.27505	7.07555e-10
TM4SF18	-1.27374	0.000322476
DNAH17	-1.27337	4.40072e-06
FAM136A	-1.27319	0.000243827
POLR2D	-1.27302	0.000117223
APEX2	-1.27265	0.00158499
RPP40	-1.27244	0.00165593
DNAJB1	-1.27191	5.68179e-09
ITGB5	-1.27177	0.00087459
DENND3	-1.27118	4.12443e-05
SLC35E4	-1.27098	0.0301542
RRP9	-1.26871	0.000273377
NUS1	-1.26727	1.44497e-05
UBTD1	-1.26613	1.0952e-05
CCDC86	-1.26603	0.00680006
MAPK4	-1.26549	0.049255
TMBIM1	-1.26527	9.05121e-05
CALU	-1.26395	0.000516623
ATF6	-1.26355	1.72331e-05
PWP2	-1.26347	1.90158e-07
ABHD2	-1.26276	0.00168301
PRXL2B	-1.2613	0.00659643
KDELR3	-1.25697	0.000274052
USO1	-1.25614	1.49831e-05
SLC25A15	-1.25599	5.46385e-08
BAG5	-1.25507	0.000139123
KLF2	-1.25433	0.00216819
SIL1	-1.25213	0.000423466
PECAM1	-1.25136	0.00197256
CC2D2B	-1.25106	0.0021977
FAM83G	-1.25052	0.00369853
ROCK2	-1.25011	0.0144689
LMAN1	-1.24956	2.35457e-05
SLC19A1	-1.24949	0.0254283
NDRG1	-1.24884	0.00445008
PLEKHO2	-1.24881	9.51749e-06
RITA1	-1.24867	6.24718e-09
THSD4	-1.24864	0.0184226
ACSL4	-1.2474	0.0021023
DNAJB6	-1.247	5.99623e-05
MGAT2	-1.24585	3.06238e-05
WDR46	-1.24566	0.00657976
LPIN2	-1.24475	1.15869e-05
YWHAQ	-1.2444	2.85755e-06
ATP6V1F	-1.24414	0.000447836
NUDT19	-1.24385	1.06475e-05
GNA12	-1.24329	0.000633581
SORCS2	-1.24306	0.0238285
PARM1	-1.24237	0.00588963
PEPD	-1.24226	0.000494646
NOL9	-1.2401	1.49112e-07
SQSTM1	-1.2389	0.00182838
CACFD1	-1.23859	0.00382102
SLC18A2	-1.23686	0.0187995
PIGA	-1.23487	0.000919054
TIMP3	-1.23453	0.018338
HDLBP	-1.23263	0.000110064
RPF2	-1.23239	0.0484179
SLC36A2	-1.23215	0.0382857
SLC39A8	-1.23211	0.000105047
LIPT2	-1.23091	0.0159124
SLC35B1	-1.2304	0.0053257
RRP15	-1.22968	0.00656848
GRWD1	-1.22932	0.00416758
THAP5	-1.2283	0.00182358
EIF2AK3	-1.22476	2.44506e-07
RELB	-1.22407	1.47523e-05
B9D1	-1.22114	1.48493e-05
NHP2	-1.22082	0.0114839
PGM3	-1.22027	3.07625e-06
RRP8	-1.21969	2.92744e-08
SLC39A13	-1.21907	8.19244e-06
ADCY3	-1.21827	0.0100376
SEC61A1	-1.21603	2.00699e-05
NEDD4L	-1.21588	5.18995e-10
FBL	-1.21556	0.00242027
ARMC2	-1.21452	0.00642328
SPATA5	-1.21426	0.000560359
ICOSLG	-1.21402	0.000404217
AGPAT2	-1.2133	0.00902737
FKBP2	-1.21305	0.0017201
CTSB	-1.21225	0.000366618
CKAP4	-1.2118	0.0254283
PSMA1	-1.21056	0.0366556
NRP2	-1.20986	0.000866023
CTSC	-1.20891	8.66261e-05
SH3TC1	-1.20809	0.000909469
SELP	-1.20804	0.00363921
HSPA4	-1.20747	0.00133403
SLC6A20	-1.20729	0.00847453
ETV5	-1.20327	0.0441043
AZIN1	-1.2031	4.42075e-05
TMEM181	-1.20293	0.000844479
GNPNAT1	-1.20292	0.000189293
FLT1	-1.20273	0.0057773
COPB1	-1.20264	4.26418e-07
TRAPPC11	-1.20208	0.0223699
TRAM1	-1.20123	2.08154e-06
CALM1	-1.2006	2.15726e-06
SOAT1	-1.19989	8.1457e-05
VWA5A	-1.19974	0.000347028
TMEM258	-1.19857	0.000586511
MFSD6	-1.19738	0.000734436
PREX1	-1.19709	0.000459801
BEND3	-1.19667	2.36743e-06
SYNE1	-1.19649	2.79059e-06
PPARGC1A	-1.19639	0.000180275
SELENOK	-1.19542	1.3857e-06
PARD6A	-1.19451	0.0184307
OSTC	-1.19362	0.000318355
GPR62	-1.19278	0.0428506
WDR4	-1.19263	0.00234024
N4BP3	-1.19106	5.18995e-10
ADAMTS12	-1.18938	0.0123956
TMEM129	-1.18877	2.68135e-05
NOLC1	-1.18755	0.000445097
STK10	-1.18739	1.72331e-05
DDX54	-1.18175	0.000110064
PRDX5	-1.18173	9.74028e-05
ITPRID2	-1.17856	0.0019816
UTP18	-1.17823	0.00103531
PSEN2	-1.17808	4.32764e-05
BCAR3	-1.17805	0.00714701
ANKRD61	-1.17709	0.00627855
YTHDF1	-1.17614	0.00287794
HMGXB3	-1.17601	2.59938e-05
CNPY3	-1.17294	0.00087459
CCT5	-1.1729	0.00141084
CRY1	-1.17204	0.00253024
PFKFB2	-1.17109	0.00016198
MESD	-1.17035	6.93564e-06
TG	-1.16992	0.000224147
SEC61G	-1.16936	0.00637071
MSRA	-1.16852	0.00242659
RTCB	-1.16779	0.00687509
GOLT1B	-1.1672	7.19062e-05
TRMT61A	-1.16666	0.000186608
MYO5B	-1.16662	0.000103596
EPCAM	-1.166	0.000285943
CEBPB	-1.16307	0.00656165
BLOC1S4	-1.16014	0.00220704
VEGFA	-1.15922	0.00259855
M6PR	-1.15836	1.0938e-06
APLNR	-1.1578	0.0368492
REXO4	-1.15764	0.00183399
PICALM	-1.15714	6.18646e-06
RSL1D1	-1.15703	0.0259877
VASN	-1.15662	0.0181338
ST3GAL4	-1.15647	0.00562572
HM13	-1.15603	3.84529e-06
GALK2	-1.15563	0.000297776
STRBP	-1.15449	8.95901e-06
FAM114A1	-1.15426	0.000124454
HSPA13	-1.15414	2.96557e-05
OSMR	-1.15413	0.0313977
SPHK1	-1.15328	0.0384492
RAB1A	-1.15325	0.00259146
POLR1B	-1.15323	2.87801e-06
MAFG	-1.15267	3.30213e-06
ETS1	-1.15267	0.000247648
ID4	-1.15241	0.0112793
GNL3	-1.15205	0.0112148
LTV1	-1.15172	0.000928273
CHCHD4	-1.15115	0.000800343
DIS3	-1.14989	0.000163887
ADORA2B	-1.14939	0.000180353
HSCB	-1.14843	0.00207683
CIAPIN1	-1.14833	0.00215043
VAPA	-1.14832	0.00551626
STARD4	-1.14828	0.00891132
TTYH3	-1.14823	0.00433652
LAMTOR1	-1.14692	0.00587902
EMP1	-1.14454	0.0181879
ABCG1	-1.14449	0.0257132
PODXL	-1.14372	0.00281232
B4GALT7	-1.14306	0.000203421
SLC27A4	-1.14165	0.0112367
TPO	-1.14035	0.00360963
HHAT	-1.13979	0.00206851
LIG3	-1.13891	7.19062e-05
GADD45A	-1.13743	0.00156538
PRNP	-1.13591	1.38157e-06
PRDM1	-1.13349	0.0103748
PKDCC	-1.13288	0.00360963
PUS7	-1.13278	0.000433877
UCHL3	-1.13199	0.014149
SPCS3	-1.13099	0.00206851
FBLN7	-1.1307	0.000170857
MRPL15	-1.13052	0.0265744
PPP1R10	-1.13003	4.89424e-05
SWAP70	-1.12999	3.6011e-09
SPAG1	-1.12982	6.78863e-05
FAM163A	-1.12969	0.029072
VAT1	-1.12787	0.00367877
DDOST	-1.12784	0.00259746
RILP	-1.1273	0.00742523
IRAK2	-1.12686	4.99526e-06
FBXO30	-1.12576	0.0337821
DGKD	-1.12569	0.00351241
LARP4	-1.12429	0.000135237
ABCF2	-1.12299	0.0249872
FJX1	-1.12269	0.000144525
ZNF593	-1.12254	0.00702579
GORASP2	-1.12241	4.62285e-06
UNC93A	-1.1221	0.0312345
DNAJC16	-1.12174	0.000485772
RPN2	-1.12146	0.00112807
TTC39A	-1.1206	0.0236602
EEF1E1	-1.11961	0.0485592
SEC63	-1.11915	6.18646e-06
ATP6V1C1	-1.11788	0.000502104
SDC4	-1.1173	0.000570869
SMAD6	-1.11705	0.00458525
TOMM40	-1.117	0.0130777
CLDND1	-1.11662	1.08304e-08
ISG20L2	-1.11589	6.7535e-06
NEDD9	-1.11557	0.000225867
TMED7	-1.11393	0.000123093
BTG2	-1.11391	0.000483221
STIP1	-1.11345	0.0236183
EDA	-1.11325	0.0177311
TMEM86A	-1.11313	1.26041e-06
NPM2	-1.11145	0.0428506
FAM167A	-1.11117	0.0187249
SNRPB	-1.11113	6.86999e-06
PLXNA2	-1.11072	0.0115969
PES1	-1.11034	2.06504e-06
PLK3	-1.10917	0.000734436
TRIB2	-1.10874	0.00467834
B4GALT1	-1.10841	0.00747761
RBM19	-1.10793	0.000674828
NKIRAS1	-1.10785	0.0312329
CLN5	-1.10739	0.000622933
APOBR	-1.10682	0.00128475
EDEM1	-1.10599	0.000664144
RABGEF1	-1.10599	9.96115e-07
LIMD1	-1.10292	0.0430464
TLNRD1	-1.10278	0.00140889
B3GALT6	-1.10216	0.0232359
TMEM214	-1.10152	1.07722e-05
BYSL	-1.1015	0.000122756
GTF3A	-1.10061	0.0109415
CDC25A	-1.10026	0.00700732
MYBBP1A	-1.1002	0.000305767
BLNK	-1.09954	9.72896e-05
IL4I1	-1.09841	0.00210888
GNB5	-1.09819	0.00232516
TFRC	-1.09645	0.0393381
FTSJ3	-1.09644	1.81683e-05
ZPR1	-1.09544	3.51189e-05
GPX4	-1.09489	0.00700732
GPATCH4	-1.09389	4.18957e-07
STK32C	-1.09337	0.0131838
NUDT4	-1.09309	0.0146292
VGLL4	-1.09274	0.00697613
PDE10A	-1.09123	0.0148066
VARS	-1.08994	0.00192428
EARS2	-1.08967	0.00057347
CCDC124	-1.08929	0.00351429
NAA40	-1.08812	0.000467679
MRPS18B	-1.08785	0.0142305
PMM2	-1.08773	0.000104682
SND1	-1.08764	0.00437292
PNPO	-1.08703	0.00248002
PGAM5	-1.0867	0.000759715
P4HA3	-1.08606	0.0445281
SSR1	-1.08533	0.0015693
LMNB2	-1.08485	0.000550861
RDH13	-1.08401	0.0237845
PIR	-1.08396	0.00358209
PTGFRN	-1.08359	0.0136394
GFPT1	-1.08091	6.24212e-05
TSSC4	-1.08036	0.0255347
CTTN	-1.0792	5.91972e-06
PINX1	-1.07804	0.000933398
ACOT7	-1.0778	0.00660899
RELL1	-1.07752	4.11317e-05
CCDC85B	-1.07747	0.00155102
TMEM263	-1.07554	0.000135698
BCLAF3	-1.0755	0.000226649
SEC13	-1.07518	0.000664144
PMVK	-1.07491	0.0352654
BAP1	-1.07271	9.30577e-05
NABP1	-1.07165	0.003522
SRP19	-1.07133	0.00124493
SDCBP2	-1.07098	0.0210924
MAPK6	-1.07092	0.00775775
ANXA5	-1.0709	0.0107961
YIF1A	-1.07087	0.000516623
TMCO3	-1.0708	1.48872e-06
COPG1	-1.07063	0.00109551
GLIS3	-1.07057	2.31072e-08
SPCS2	-1.06989	7.19062e-05
FBXL18	-1.06983	0.0104309
MTCH2	-1.06947	0.00331759
POMGNT2	-1.06839	0.0181574
TMEM208	-1.06825	0.000186608
CFAP73	-1.06789	0.0145094
ATP2C2	-1.06781	0.000798715
PRRG1	-1.06615	0.00494289
NCR3LG1	-1.066	0.00259746
SPNS2	-1.06561	1.2659e-05
ESRRA	-1.06525	0.0154739
IPO4	-1.0648	3.43408e-05
TMEM248	-1.06433	2.75928e-06
POLR3E	-1.06419	0.00011704
ARCN1	-1.06386	1.51444e-06
S1PR2	-1.06355	0.0222089
SRM	-1.06293	0.00147089
GGA2	-1.06245	2.9037e-05
UMPS	-1.06229	1.92248e-05
GNS	-1.06199	0.000392543
NLN	-1.06147	0.00464514
KDELR2	-1.06116	8.3565e-06
SDF2	-1.0606	0.000335677
VKORC1L1	-1.06028	0.000670167
LMTK2	-1.06022	1.42363e-05
KCNN3	-1.0593	0.049408
HSD17B12	-1.05783	0.0132284
YKT6	-1.05762	0.00043985
FUT11	-1.05744	0.021299
PGP	-1.0574	0.0255488
STAT3	-1.05739	2.01444e-05
ACSS2	-1.05713	0.0270947
URB1	-1.05688	0.00131916
IQCD	-1.05663	0.0415025
SMAD9	-1.05645	0.0294386
ABHD11	-1.05274	0.00409261
EFNB1	-1.05265	0.000570978
GTF2E2	-1.05206	1.49831e-05
THAP12	-1.05077	0.0014692
CNPY2	-1.05074	6.90779e-05
SSR3	-1.05059	0.00348301
RRAGC	-1.05005	0.00283569
CCDC85C	-1.04971	0.00177316
PTP4A1	-1.04941	0.0131057
IVNS1ABP	-1.04877	2.68303e-06
HEG1	-1.04771	0.000158245
LYSMD3	-1.04597	4.90981e-06
WDR43	-1.0453	0.00131956
RSL24D1	-1.04524	0.00779386
TWF1	-1.04371	2.68303e-06
WSB2	-1.04346	0.0436463
PREB	-1.04334	0.000327394
TSC22D1	-1.0428	0.000492189
DERL1	-1.04164	0.00107196
KCNA1	-1.04048	0.0259454
HES1	-1.04008	0.00597257
MYH14	-1.03994	0.000199735
ZNF366	-1.03988	0.0217942
CCNJ	-1.03934	0.000473287
STX5	-1.03928	6.04413e-06
AFAP1	-1.03918	0.0011207
DUSP16	-1.03883	0.00119034
SCNN1B	-1.03828	0.00687509
PFKL	-1.03787	0.000655264
LRRFIP1	-1.03779	0.00440723
TRMT6	-1.03671	0.000285943
ARFIP1	-1.03657	0.0004944
NT5C3B	-1.03549	7.45198e-05
SLCO2A1	-1.03406	0.0236183
MTCH1	-1.03406	0.000391361
MORF4L2	-1.03405	1.48872e-06
IMP4	-1.03391	0.000868518
DNAJC25	-1.03256	3.18597e-05
ERN1	-1.03209	2.47505e-06
DHRS1	-1.03208	0.000382747
SMAD7	-1.03183	0.000148102
TTC4	-1.03176	0.0054789
AKIRIN1	-1.03169	0.00107064
EZR	-1.03142	3.43956e-05
ARHGDIA	-1.0305	0.00028673
TEN1	-1.03011	0.00577382
FAM110C	-1.03003	0.000937726
PDXDC1	-1.02993	1.86087e-06
RBM28	-1.0287	0.00353949
SHANK2	-1.02862	0.00462975
DLL4	-1.02767	0.0171586
PPP1R37	-1.02761	0.00366844
MARS2	-1.02674	0.0250371
ERLIN1	-1.02614	1.91325e-05
NOP2	-1.02568	8.8283e-06
KIF16B	-1.02481	0.000621906
ARF1	-1.0244	0.000127174
TNKS2	-1.02346	0.00625634
RALGPS2	-1.02319	0.0488016
MAGED1	-1.02315	0.00254716
EXOSC6	-1.02303	0.00072302
FRRS1	-1.0225	2.35457e-05
SLC39A11	-1.02106	0.000486634
CCDC126	-1.02083	0.00318606
DET1	-1.02076	0.0383814
NIFK	-1.02019	0.0265918
MRPL27	-1.02014	0.000186608
ZNHIT3	-1.01993	0.00707466
ERP44	-1.01928	3.98394e-05
GPR137B	-1.01822	0.0030028
USPL1	-1.017	5.36211e-06
LMNA	-1.0165	0.0148114
DNAJB4	-1.01627	0.0232033
MTAP	-1.01616	0.00128464
PCBP1	-1.01541	0.000131753
GNPTAB	-1.01464	0.0277452
SLC29A3	-1.01444	0.000740262
HACD3	-1.01403	0.000952152
MSI2	-1.01321	0.000350249
GALNT2	-1.01298	0.00214114
TMEM167B	-1.01286	4.31638e-07
PIEZO1	-1.01256	7.5773e-06
SLC5A6	-1.01248	0.00578572
DDX18	-1.0123	8.3565e-06
NAT10	-1.01215	0.000246068
SMPD1	-1.0119	0.000933933
VOPP1	-1.01189	0.000189036
CD14	-1.0113	0.0243376
GABRB3	-1.01096	0.00533101
SAE1	-1.01075	0.00291416
ZFPL1	-1.00972	0.000138838
UBE2J1	-1.00965	8.14415e-07
DNHD1	-1.0093	0.0127146
PDE12	-1.00903	0.0192057
NR2C2AP	-1.00894	5.89487e-06
PSMD3	-1.00811	0.0157138
POMP	-1.00647	0.0328371
SEC23IP	-1.00647	4.10327e-06
GHITM	-1.00606	0.00551046
BABAM2	-1.00606	0.00175293
NSUN2	-1.00582	0.00084668
ST3GAL1	-1.00504	0.00248649
GPI	-1.00491	0.0393686
TAGLN	-1.00464	0.0191338
ASCC3	-1.00439	3.09928e-05
TRIB1	-1.00436	1.47523e-05
LRRC8A	-1.00412	0.00158734
BEX2	-1.00381	0.0192064
MYCN	-1.00332	0.0275366
COPB2	-1.00266	0.000278878
SH2D4A	-1.00209	0.000333064
CDV3	-1.00195	0.0378954
ATP6V0D1	-1.00171	0.00359292
HSPD1	-1.00126	0.00591437
RPS19BP1	-1.00096	0.000854118
MINPP1	-0.99989	0.00484261
YARS	-0.999339	0.0297901
ICMT	-0.999286	0.0036234
FOXF2	-0.99892	0.0460227
NOC2L	-0.998404	3.98394e-05
CTPS1	-0.998069	0.0102589
TMED4	-0.997573	0.000532551
JAG1	-0.996475	9.17057e-05
SRP9	-0.995531	0.000274208
BHLHE40	-0.99509	0.0428901
HK1	-0.994843	1.3857e-06
RER1	-0.99418	3.62409e-06
DDX21	-0.993321	2.86213e-05
EIF4G2	-0.993129	0.000634959
PPP1CA	-0.992997	0.0102275
DDX56	-0.992895	0.000447836
ARHGEF15	-0.99276	0.0107432
NFKBIE	-0.992352	0.00734177
GCLM	-0.991132	0.000381246
DNAJA2	-0.99105	0.00416425
EBAG9	-0.990974	0.00239452
MRI1	-0.989983	0.00248617
DOLK	-0.989184	0.000168368
DNPEP	-0.988535	8.39698e-05
GIPC3	-0.988525	0.0143473
RAB35	-0.987548	0.000636196
GABARAPL1	-0.987499	1.86087e-06
WDR86	-0.987134	0.0427883
RFWD3	-0.986557	0.00271149
ERGIC1	-0.9858	0.000447836
ST7	-0.985297	9.67978e-06
RNF24	-0.984771	0.0110663
MAK16	-0.984618	0.00290565
EVA1C	-0.984398	0.0181016
IDE	-0.984217	1.49831e-05
SLC25A17	-0.983569	0.00325182
MCUR1	-0.983524	0.00113208
CDH5	-0.983279	0.0196284
DDIT4	-0.982958	0.0332699
KCNA6	-0.982788	0.00409803
RAPH1	-0.982411	0.0179384
RCC1L	-0.982375	1.49831e-05
EMC3	-0.981852	0.00046236
GOSR2	-0.981845	5.98316e-07
CMTM6	-0.981471	0.000130697
SEL1L	-0.980049	0.00068265
MRPL20	-0.979839	0.00337154
SMIM13	-0.979562	0.0161516
AMPD2	-0.97951	0.000382747
FAM122A	-0.979318	0.00520303
ARMC6	-0.979243	0.0398696
MAL2	-0.978926	0.00318699
FTSJ1	-0.978769	1.70311e-08
TIPARP	-0.978731	0.000988946
NOP58	-0.97857	1.86433e-05
SPRYD3	-0.978422	2.05374e-05
PDIA5	-0.978081	0.0117174
ABI3	-0.977241	0.00529399
RIOX1	-0.977221	0.0107703
BUD23	-0.977163	0.0205531
E2F4	-0.97675	5.33891e-06
MAN2A2	-0.97663	9.37442e-06
RCOR2	-0.976409	0.0214979
NRBF2	-0.976198	0.00404912
SNX19	-0.975992	0.000867567
USP42	-0.97596	0.000329095
MRPL18	-0.975583	0.00343386
KPNA6	-0.975408	0.00396356
SEMA5B	-0.974592	0.00127377
DNAJC5	-0.974564	0.00708803
MYO7A	-0.974246	0.0250503
HARBI1	-0.974168	0.000895604
PRMT3	-0.973743	0.00464385
MCL1	-0.973722	0.000715301
TM9SF3	-0.973593	1.3857e-06
VAMP7	-0.973468	0.00703426
TIMM13	-0.973203	0.0301161
DUOXA2	-0.972722	0.0169861
ZBED3	-0.971857	0.00765049
ALG11	-0.971438	0.000604959
AGPAT3	-0.970897	0.00408511
ABTB2	-0.970772	0.0021023
TAGLN2	-0.969537	7.60696e-05
MRM1	-0.969409	0.00244353
MLEC	-0.969372	0.000815961
CLTC	-0.969213	2.44506e-07
EIF4E	-0.969143	0.014384
TCEAL8	-0.968651	0.000134174
WIPI1	-0.968059	0.00707466
VMA21	-0.967839	0.0106567
MMGT1	-0.96777	2.91989e-06
TM2D3	-0.966794	0.000276623
ADRM1	-0.9666	0.00621428
TTC9C	-0.965928	0.00696795
RNMT	-0.965746	2.93337e-06
SLC25A10	-0.965545	0.0224666
FKTN	-0.96464	0.0281768
RAB5A	-0.964051	9.96115e-07
PEX5	-0.963892	0.000352277
GMPR2	-0.963217	0.0118269
COPZ1	-0.96316	0.000563625
PSME3	-0.963072	0.000356516
CMPK1	-0.962644	3.45431e-05
SRSF9	-0.962471	3.35972e-05
RBM47	-0.962273	0.000103518
JAK3	-0.962012	0.0213919
MTMR4	-0.961846	0.0193967
ZBTB22	-0.960145	0.000419057
REXO2	-0.959027	0.00373814
TFG	-0.958922	2.91466e-05
CLIP2	-0.958852	0.00520841
PSMC4	-0.958788	0.0117679
PRMT5	-0.958622	0.0147789
LRRC27	-0.958533	0.0146782
GBE1	-0.958446	0.00337157
TMEM51	-0.958368	0.00949335
VTI1A	-0.958301	0.000442394
CLINT1	-0.958208	7.45198e-05
SHANK3	-0.957063	0.00512122
SLC39A9	-0.956753	0.000486471
ELP3	-0.956597	9.53201e-05
PET117	-0.956445	9.02954e-05
CD59	-0.956429	0.0291319
TNFAIP3	-0.955489	0.00346615
FAM110D	-0.955433	0.00750694
SRSF12	-0.955391	0.0256404
DESI1	-0.954252	0.0134825
SEC24A	-0.954169	0.000241239
ABHD17C	-0.953857	0.000276412
PLEKHM2	-0.953136	0.000593633
ID2	-0.952409	0.0288976
SUPT16H	-0.952233	0.000844479
STK40	-0.951081	0.000819239
EIF6	-0.950975	0.000542306
ARFGAP3	-0.950485	0.00180931
PISD	-0.950335	0.000273377
CDC26	-0.950202	3.81536e-05
AKAP1	-0.950168	0.0129531
CREB3L2	-0.949959	6.86999e-06
ACBD3	-0.949958	5.28321e-07
CBR4	-0.949711	0.0432858
CIB1	-0.949429	2.03353e-05
TATDN2	-0.949283	0.00280301
CMIP	-0.949256	0.0161516
ABR	-0.9491	0.00012568
TNFRSF19	-0.948581	0.000911271
JUNB	-0.948492	0.00214114
CCDC117	-0.948449	7.4636e-05
KTI12	-0.948013	0.003006
SERPINH1	-0.947392	0.0117213
SDHAF1	-0.947263	0.0220394
MTFR1	-0.946941	0.000559407
ATP6V0A2	-0.946228	1.77716e-05
CCDC115	-0.946187	0.0123659
RAB15	-0.945911	0.00128475
EIF4A3	-0.945603	2.0518e-06
SNRPG	-0.9456	0.00433652
DCAF13	-0.945483	0.00817312
PRRC1	-0.945092	0.000214167
TMEM33	-0.94438	1.01466e-05
EEFSEC	-0.943935	0.000585877
USP5	-0.943921	0.00905905
SDCBP	-0.943803	6.82592e-05
SPART	-0.943648	0.00139573
SEMA3G	-0.943424	0.00966192
TMEM97	-0.942896	0.00520303
UBFD1	-0.942188	0.00796724
UGDH	-0.942153	0.00130593
PI4K2A	-0.942078	0.000566919
GDPGP1	-0.941786	0.00995914
TMF1	-0.940164	2.47505e-06
ARPC1B	-0.939298	0.00491
TRIM56	-0.939283	0.002123
RIOK1	-0.939084	3.69444e-05
EIF3B	-0.938826	0.00291689
PLGRKT	-0.938778	0.00220704
UBAP1	-0.938645	0.0216459
CRCP	-0.938559	0.000652259
G3BP2	-0.938512	0.000598826
TOMM34	-0.93798	0.00170557
CMAS	-0.937841	0.0117024
RALGDS	-0.937821	0.00361209
RHBDD1	-0.937647	1.1081e-05
ARHGEF10L	-0.937521	0.0461908
SRSF2	-0.937342	0.000636196
PIK3C2B	-0.936868	0.00188909
SURF6	-0.936866	0.00272385
HIF1A	-0.936613	0.00044962
EMC8	-0.936499	0.0362271
BET1	-0.935994	0.000128028
WAPL	-0.935453	1.57572e-06
DOT1L	-0.934882	1.07091e-05
PRMT1	-0.933936	0.00491
LRRC8B	-0.93369	0.0105782
CLTRN	-0.933684	0.016987
ZNF664	-0.93244	2.70913e-05
YOD1	-0.932205	0.0053257
PQLC2	-0.932189	0.025786
WDR75	-0.932025	0.00659765
NCK2	-0.93194	3.73306e-05
CHST15	-0.931814	0.00995914
PGS1	-0.931743	6.14438e-05
JAGN1	-0.931543	0.0063802
RNF180	-0.931507	0.0108442
LMAN2	-0.930956	0.00029746
ARMCX3	-0.930934	2.35457e-05
CPT1A	-0.930918	0.00361641
NOL6	-0.930038	0.00787634
JCAD	-0.929739	0.000160537
SLC44A1	-0.929475	0.000512399
RAD51D	-0.929197	0.0354741
SRP68	-0.928872	0.000698206
ADAMTS9	-0.928234	0.0138564
OPA3	-0.927487	0.0325956
PEX11A	-0.927428	0.00230034
ATP6AP1	-0.926596	0.00905905
NRIP1	-0.926386	3.75242e-05
PPP1R9A	-0.925985	0.00515886
MPZL2	-0.925956	0.0138999
NR6A1	-0.925934	0.00777539
CEP170B	-0.925441	0.0266962
SKA3	-0.925314	0.00176316
DRG1	-0.925095	0.0180624
FADD	-0.925085	0.000447836
NSF	-0.924635	0.000215098
COL13A1	-0.924455	0.0478047
DDIT3	-0.924454	0.0106567
SPTY2D1	-0.923776	2.40043e-05
ATP8B1	-0.923771	0.0012034
AATF	-0.923739	0.000362812
TMEM184B	-0.92368	0.00418838
CASP6	-0.923578	0.00328694
GSS	-0.922921	0.0117679
TM9SF1	-0.92263	3.85117e-05
VASP	-0.921911	0.000109794
IMP3	-0.921459	0.00613626
GRPEL1	-0.921348	0.0489762
FBXW11	-0.921138	0.00113967
MAGT1	-0.920323	0.00174101
ZMAT3	-0.92024	0.00075931
SYAP1	-0.920051	0.00265151
UBN1	-0.919819	0.00097645
CCND1	-0.919607	0.0314524
ENSA	-0.919155	0.000856097
ADAT3	-0.91908	0.00363743
ASB1	-0.918291	0.00172467
TMED5	-0.917623	0.000764309
TTC27	-0.91752	0.0105521
OAZ1	-0.917323	0.0052096
TUBA1C	-0.915929	0.0405313
ABRACL	-0.915827	0.00084668
PDE8A	-0.915731	0.00129086
FOSL2	-0.915619	0.00648941
TIMM10B	-0.915596	0.00662655
COL14A1	-0.915333	0.000108151
GSPT1	-0.915285	0.0185081
ABCF1	-0.91515	0.0180832
CREM	-0.914737	0.0245699
SOD1	-0.914589	0.000393476
FAM107B	-0.914312	0.0164879
MARVELD3	-0.914142	0.000186608
MAPKAP1	-0.913054	0.000199735
RAB11FIP5	-0.912956	0.00245353
TNFAIP8L1	-0.912264	0.000458489
USP12	-0.911822	0.000437398
SERTAD2	-0.911358	0.00013318
PHC2	-0.911338	8.13881e-06
CLUH	-0.910706	0.0338393
ATP2B2	-0.91056	0.0368846
RCHY1	-0.909867	0.00129251
TPGS2	-0.909816	8.42615e-05
MAN1B1	-0.908954	0.00285569
SDC2	-0.908513	9.30577e-05
WNK1	-0.908442	0.00325182
PSMA6	-0.908287	0.0283386
TMEM39A	-0.90761	8.39698e-05
GOLPH3	-0.907453	0.0107885
SNX1	-0.907342	4.39703e-06
CHPF2	-0.907075	0.000604959
ENPP4	-0.906898	0.0050428
CHPF	-0.906788	0.0104309
XPO5	-0.906498	5.62554e-05
CTTNBP2NL	-0.906033	0.00573124
ACTN4	-0.905774	0.00305196
RABGGTB	-0.905349	0.00207683
SAR1B	-0.905232	0.0184307
SLC19A2	-0.90511	0.0427883
BMP2	-0.905064	0.00625497
ECE1	-0.904938	0.000326224
ARSA	-0.904493	0.030701
YIPF3	-0.904291	0.000545038
RGS3	-0.904151	0.0030151
LYPLA1	-0.904107	0.000855001
NOM1	-0.90382	1.42363e-05
ACP2	-0.903733	0.0482072
ABHD13	-0.903723	0.000766963
ATP6V0C	-0.902485	0.00325182
CLPTM1L	-0.90179	0.000392543
ZNF706	-0.901649	0.00123621
LDB2	-0.901565	0.000423466
SYNCRIP	-0.900709	5.47722e-05
ADPGK	-0.900553	0.000104141
TMEM125	-0.900051	0.0146631
SSH3	-0.899971	0.000279677
SLC16A2	-0.899871	0.0036234
DENND2D	-0.89891	0.00274973
NOP9	-0.898377	9.53201e-05
DOHH	-0.898312	0.0427883
VHL	-0.898279	0.000593317
TM9SF4	-0.898246	0.000193841
ZNF131	-0.89815	0.00162463
MAPRE1	-0.897856	0.0112793
PHF23	-0.89765	0.000274052
SERTAD1	-0.897563	0.00272385
CTPS2	-0.897289	0.000815921
MDN1	-0.897087	0.000246068
FAM219A	-0.896943	0.00358177
PSMC3	-0.896487	0.0316817
RUVBL1	-0.896472	0.00520303
REEP4	-0.896366	0.0489919
CEP152	-0.896353	0.0159096
DPY19L4	-0.895739	0.00568266
CAPN2	-0.895521	0.00897995
NUAK2	-0.895299	0.0399853
RPIA	-0.894925	0.00476435
CPTP	-0.894544	4.85623e-05
THAP4	-0.894501	0.0200029
EHD4	-0.894432	0.00809544
PLPP2	-0.893845	0.00331939
PUSL1	-0.893645	0.0351818
MPHOSPH10	-0.893051	0.00155342
ZBTB41	-0.892952	0.000251427
CCT2	-0.892651	0.0300969
UTP15	-0.891557	0.0147739
LY96	-0.891467	0.00191464
TMCO1	-0.891439	0.0084049
MRPL12	-0.891243	0.0238665
AMDHD2	-0.891102	0.00548529
SPTBN2	-0.891097	0.0323452
EMID1	-0.890687	0.0305003
SNX5	-0.889556	0.00775043
ARF6	-0.889505	0.00246773
SELENOF	-0.88933	0.00123621
GOLGA7	-0.888956	0.000180353
DCTN5	-0.888557	0.0301978
IL4R	-0.888471	0.000614202
PPP1R15A	-0.888358	0.00775775
SERINC2	-0.88834	0.0226244
EXD2	-0.888122	0.043202
MORF4L1	-0.887965	0.011983
WWC3	-0.887915	0.000486634
POP1	-0.887582	0.0488512
PSMD10	-0.887394	0.00404912
CD63	-0.886997	0.000400947
TSPAN12	-0.886974	0.0454531
PPIB	-0.886826	0.00260146
NANP	-0.886719	9.42912e-08
PDCD6	-0.886075	0.00273924
PPARD	-0.885693	0.00796221
MMRN2	-0.884976	0.00409176
AGO2	-0.884668	0.000759419
SLC35F5	-0.884111	0.00782692
RHOB	-0.883735	0.00339843
TNFRSF1A	-0.883712	0.000928916
GOLGA5	-0.883281	0.000165699
CACUL1	-0.883244	0.00429238
GUSB	-0.882212	0.0084682
IGSF3	-0.881916	0.0384051
CDIPT	-0.881423	0.00287945
CHST1	-0.881361	0.0153449
NDFIP2	-0.88119	0.00228589
ARFIP2	-0.880794	0.00427063
TMEM222	-0.880646	0.000181003
ENO1	-0.879723	0.0220877
B4GALT2	-0.879426	0.00206851
COBLL1	-0.879175	0.0228474
TMBIM6	-0.878877	0.00213663
ATP6V1A	-0.878808	0.0102275
PA2G4	-0.878775	0.00155482
COPA	-0.878611	0.00011704
UAP1L1	-0.878508	0.00347502
CDS2	-0.878427	9.13809e-05
SLC9A3R2	-0.87827	0.000505232
NAF1	-0.87727	3.18597e-05
SLC26A3	-0.876843	0.0320528
STAT5A	-0.875892	0.0200974
PELI1	-0.87533	0.000486634
TOMM5	-0.875283	0.000844479
SCFD1	-0.874587	0.00506118
RBM3	-0.874354	1.9743e-05
PTGES3	-0.874113	0.000734436
FHOD1	-0.873783	0.0201071
KIAA0100	-0.872804	0.01368
PTBP1	-0.872802	1.03428e-05
AFG3L2	-0.872233	0.00146122
EMC7	-0.871995	0.00698971
GEMIN5	-0.871777	0.00627749
TMEM43	-0.871708	0.00541557
MAVS	-0.871504	0.0180695
ETS2	-0.871078	0.023024
NUP93	-0.870943	0.00619666
SEPHS2	-0.870642	2.9871e-05
AMIGO2	-0.870604	0.0488822
RAB2A	-0.87037	0.00260266
STEAP3	-0.870191	0.0202814
FAM91A1	-0.869987	0.00365657
USP39	-0.86998	0.00158408
E2F3	-0.869924	0.00186027
ATOX1	-0.869907	0.0156831
CRYBA1	-0.869618	1.58968e-07
KCNAB1	-0.869596	0.00688219
PDGFRB	-0.86952	0.0285112
SBDS	-0.869422	0.021833
CTDP1	-0.869171	0.000280328
TSG101	-0.868848	0.00147089
HNRNPH2	-0.868846	0.00657976
EEF1AKMT3	-0.868437	0.000516623
CPM	-0.868278	0.0404489
ACTR3	-0.868085	8.39698e-05
NCK1	-0.867655	0.0216459
HYAL2	-0.867404	0.00799506
GRAMD4	-0.867256	0.0253965
PRKAR1A	-0.866771	0.000277436
EIF1AX	-0.866423	0.000492189
CLCN4	-0.865862	0.00880624
LMF1	-0.865568	0.00256867
RWDD4	-0.865238	0.01495
NSMCE3	-0.86442	0.00355067
SCOC	-0.864333	0.000446839
LIMK2	-0.864198	0.0149657
PITPNA	-0.862967	1.22757e-05
MAPKAPK2	-0.86289	0.0259863
SETX	-0.862852	0.000209551
MAGEH1	-0.8627	0.000646
FBXO33	-0.862485	0.0201895
WDR89	-0.862214	0.0294386
ADAM9	-0.861999	0.0117087
NOP10	-0.861397	0.0398137
RTCA	-0.861366	0.038665
CAMKMT	-0.861179	0.0328532
YIPF4	-0.860889	0.00404682
APMAP	-0.860838	0.000934685
SRP54	-0.860349	0.0108442
MTOR	-0.860306	0.000130697
ADAM17	-0.860194	6.3977e-07
RASSF3	-0.860148	5.62554e-05
OTUD3	-0.86004	0.00053149
MFSD1	-0.859942	0.0446877
RALB	-0.859712	6.13765e-05
RNF14	-0.859589	0.0496835
CYTH1	-0.859245	0.00021499
ACTN1	-0.858625	0.000576299
MIA2	-0.858376	0.000294157
RBM33	-0.858302	0.025573
FNIP1	-0.858208	0.000273377
NUP153	-0.857967	0.0069059
PLAA	-0.85784	0.00959231
MRS2	-0.857526	0.0147437
OGFRL1	-0.857226	0.0104716
SLC48A1	-0.857168	0.0163153
SMIM26	-0.857112	0.0423206
GOLGA3	-0.856977	2.57193e-05
SNRPE	-0.856533	0.000419057
PEF1	-0.856517	0.00429238
CHID1	-0.85637	0.0227503
POLR2G	-0.856207	0.0101571
SNRK	-0.856186	0.0278501
DHX8	-0.855885	0.000335677
NUFIP2	-0.855655	0.000393476
RNPS1	-0.855558	0.000218235
ATP6V0A1	-0.855376	0.0213919
TRADD	-0.854784	0.000646796
DDX23	-0.854436	0.000247648
CCDC91	-0.853815	0.0020681
RNF26	-0.853739	0.000560359
PEX14	-0.85353	7.92675e-09
UTP3	-0.853501	0.000162961
PDGFB	-0.853057	0.0282294
CLIC1	-0.852995	1.01974e-05
ARHGEF40	-0.852645	0.0229669
OGFOD3	-0.852344	0.0325711
ANKRD52	-0.852024	0.00134091
DDB1	-0.851363	0.01519
PSMD6	-0.850404	0.0412531
VPS26C	-0.850288	0.00430508
URM1	-0.850058	0.00616186
ARPC2	-0.849794	0.000792096
DPM2	-0.849594	0.00576882
GRHL1	-0.849495	0.0446877
GNAI3	-0.849231	0.0225434
SMIM14	-0.849067	0.00558823
AP5B1	-0.849028	0.0150134
DCAF10	-0.848373	0.014765
GMPPA	-0.848023	0.0386422
PXMP4	-0.847792	0.0231525
TXNDC11	-0.84756	0.00166156
NEU1	-0.847075	0.00153832
EPHA2	-0.846921	0.00158472
NDUFV3	-0.846871	0.033796
FURIN	-0.846819	0.0012091
HNRNPM	-0.846584	0.0117213
PDXK	-0.846546	0.00232516
CAND1	-0.846371	0.000287028
FARS2	-0.846038	0.020958
MFAP1	-0.846005	0.00729103
SBF1	-0.845987	0.0178604
TMEM30A	-0.845868	0.00466537
ATP13A3	-0.845658	6.64806e-06
CPEB4	-0.845547	0.0012802
ARSJ	-0.845402	0.0444767
IFT20	-0.844935	0.000197469
ELOVL5	-0.844397	0.014128
LAPTM4A	-0.84403	0.0308257
NCKIPSD	-0.843469	0.030256
UBA5	-0.843311	0.0012091
RAB8A	-0.843174	0.0296494
TRIM47	-0.84164	0.00267556
ZNF697	-0.841612	0.000796867
RIC8B	-0.841302	0.00608047
RBP1	-0.841277	0.0227813
STK17A	-0.841243	0.0471386
BMS1	-0.84123	0.000886804
EYA2	-0.841115	0.000876107
CDK12	-0.840526	0.0098369
WDR3	-0.840163	0.000798333
SLC37A3	-0.840084	0.000138838
BMP2K	-0.840069	0.000697179
SMARCB1	-0.839827	0.0276185
NIF3L1	-0.839411	0.0326466
SEC16A	-0.839392	0.00856049
GFER	-0.838931	0.00182838
MYO1D	-0.83893	0.0314132
ZNF316	-0.838866	0.000125366
CASP7	-0.838801	0.0328657
RFFL	-0.838558	0.000117476
SWI5	-0.838499	0.00577212
USP4	-0.838319	0.0163432
DNAJA1	-0.838285	0.00272385
BNIP3	-0.838188	0.0431676
IRAK1	-0.838174	0.0020681
TMEM53	-0.838154	0.0259877
BNIP1	-0.838118	0.00954518
UTP25	-0.83793	0.000686837
EIF2S1	-0.837912	0.00946099
NAV1	-0.837841	0.0302465
SUGP2	-0.836503	0.00937491
NXT1	-0.836444	0.0160682
FOXK2	-0.835939	0.000216736
MYADM	-0.835724	0.0105666
SCAND1	-0.835283	0.000934685
PSMD12	-0.83516	0.0215186
MTRR	-0.834846	0.000865848
PALD1	-0.83438	0.0226209
CALM2	-0.834278	0.0152841
EIF2B1	-0.83409	0.0183663
PSMA7	-0.833826	0.0300964
MFSD11	-0.833774	3.89717e-05
IMPDH2	-0.833362	0.000262851
COG3	-0.83315	5.54076e-05
ACP5	-0.833043	0.00597066
ELAC2	-0.833008	0.012985
PTPRJ	-0.832945	0.00775043
CHMP2B	-0.832897	0.00545785
HSPBP1	-0.832798	0.0452248
ARL2BP	-0.832435	0.00679737
FAM131A	-0.83235	0.01519
MOCS3	-0.832306	0.00026122
TRIP13	-0.831983	0.00207237
TDP1	-0.831348	0.0200559
GOLGA2	-0.831279	0.00074577
PSMB2	-0.831246	0.0483138
PLEKHO1	-0.830804	0.0251766
MSN	-0.830722	2.31072e-08
ST6GAL1	-0.830559	0.0417119
DUSP12	-0.830402	0.00629107
PUF60	-0.830142	0.00104158
TGOLN2	-0.830015	0.0086328
CDC37L1	-0.829893	0.0200029
SH3GL1	-0.82928	6.86999e-06
HS6ST1	-0.8289	0.0119955
L3MBTL2	-0.828551	0.00708019
PRMT7	-0.828372	0.000164907
STT3B	-0.828238	0.0193253
NAA60	-0.828053	0.00703102
TBC1D20	-0.828031	7.94643e-05
TRMU	-0.827939	0.0113106
TMEM204	-0.827657	0.0192614
PAF1	-0.826785	5.52981e-06
ARL10	-0.826725	0.0355678
TRAPPC10	-0.826678	0.000231455
KIF3B	-0.826405	0.00716193
HEXB	-0.826107	0.00245353
MRPL34	-0.825932	0.00492566
TOLLIP	-0.82557	0.000166491
CEBPD	-0.825544	0.0030151
LETM1	-0.825228	0.00453887
PLXND1	-0.824948	0.0221906
MRPS21	-0.824255	0.00257516
WDR61	-0.824082	0.00319491
BEND7	-0.824066	0.000759715
ARMC5	-0.824023	0.00282064
PLEKHF2	-0.823738	0.000225803
SF3B3	-0.82351	1.14668e-05
GID4	-0.823097	0.00210962
DCP1A	-0.822659	0.0299249
NFKBIZ	-0.822547	0.00978668
NUDT15	-0.82227	0.0278343
RRP7A	-0.82224	0.00583678
ZDHHC3	-0.822131	0.00150625
SELENOT	-0.821626	0.00279227
AFAP1L2	-0.821524	0.00871323
ENPP1	-0.821323	0.0105191
PLEKHG1	-0.821155	0.0253275
AK2	-0.821018	0.000459745
PPP4R2	-0.820984	0.0012561
TXNRD1	-0.820719	0.0249564
DENR	-0.820705	0.0122847
UBE3C	-0.820621	0.000715628
PACSIN2	-0.820605	0.000588118
TMEM165	-0.820464	9.97911e-05
STK16	-0.820447	0.00189612
BCR	-0.82043	0.00168848
SEC24C	-0.819839	0.000120094
ATP6V1D	-0.819769	0.00182358
LRBA	-0.818748	0.0188506
CLEC14A	-0.818527	0.0180759
ACOT8	-0.818437	0.0209524
MRPL21	-0.818397	0.0443243
TMEM64	-0.818241	0.0138271
NACC1	-0.818062	0.0245426
PRR13	-0.817746	6.56282e-06
ARPC5L	-0.817009	0.0110411
EFL1	-0.816991	0.005076
BCCIP	-0.816847	0.00616557
POLR2F	-0.816452	0.0111135
HNRNPR	-0.81568	0.00322145
BICD2	-0.815473	7.07555e-10
TSC22D2	-0.815465	0.000114877
PLCG1	-0.815442	0.0179624
PDZD11	-0.815405	0.00260722
APLN	-0.815304	0.00153442
JUND	-0.81514	0.00520841
ATP6V0B	-0.814881	0.000446839
LPGAT1	-0.814875	0.0226483
TRIM4	-0.814786	0.0224959
RRAGA	-0.814318	0.0161516
HPS6	-0.813915	0.0269271
TM9SF2	-0.813006	0.0169033
DLL1	-0.812932	0.0104716
CPQ	-0.812526	0.00392946
ELK1	-0.812307	0.00170432
PHAX	-0.812248	0.000723461
EI24	-0.811927	0.0315798
MYDGF	-0.811586	0.000703277
CFAP36	-0.811558	7.78535e-05
IRAK4	-0.811288	0.00539918
QTRT2	-0.811076	0.0162838
YBEY	-0.81084	0.0377584
LAMTOR2	-0.810798	0.0193253
ACSL5	-0.810724	0.0220394
ZDHHC23	-0.81047	0.0004944
TET3	-0.810467	0.00787634
PSMB3	-0.81043	0.0441043
PIN4	-0.810175	0.0224075
SPPL2B	-0.810007	0.0214359
GPS1	-0.809762	0.00639282
PHB2	-0.809691	0.0216758
PATL1	-0.809683	1.42363e-05
EFHD2	-0.809437	0.00138494
SENP3	-0.809389	2.48492e-05
GNPDA1	-0.808639	0.029054
PARN	-0.808611	4.46502e-05
RNGTT	-0.808191	0.00321951
RAB43	-0.808015	0.0105666
TNFRSF1B	-0.807534	0.025786
LSM12	-0.807449	0.0202043
LSM6	-0.806403	0.01266
MECR	-0.806352	0.00257057
GPD1L	-0.806295	0.00177316
IER3IP1	-0.806034	2.99434e-05
PLCG2	-0.80576	0.0226209
CRK	-0.805666	0.000835754
HIGD2A	-0.805458	0.0236676
NCLN	-0.805333	0.00410455
ARFGEF2	-0.805205	0.000584268
NCL	-0.805051	0.0169441
FXYD5	-0.80505	0.0378954
LAGE3	-0.804567	0.0190253
ABCA5	-0.80415	0.0287676
ABCD3	-0.804141	7.70497e-05
SNRPA1	-0.803803	0.0114348
SGPP1	-0.803163	0.00870792
NAP1L4	-0.803123	0.00112652
TEX264	-0.803038	0.000938921
CENPO	-0.802813	0.0112793
AAGAB	-0.802729	0.0243358
HOXB2	-0.802717	0.0347453
MIEF1	-0.802359	0.00393081
AFF4	-0.802261	0.000275345
LASP1	-0.802198	0.0004944
METTL21A	-0.80185	0.000108151
VPS13A	-0.801458	0.00140774
CDK2AP1	-0.800576	0.0467314
PLEKHM1	-0.799921	9.8953e-05
ECHS1	-0.799528	0.00990248
VPS26A	-0.798895	0.000156815
CCDC137	-0.798725	0.000355774
SET	-0.798462	0.000866023
B4GALT5	-0.798233	0.016987
PPIL1	-0.79787	0.00259123
SLC35A4	-0.797446	0.0228961
PPP1CB	-0.797232	0.0268651
SPECC1	-0.796589	0.00665527
ZNF318	-0.796453	1.05003e-08
FAM98A	-0.796226	0.00529399
HNRNPA3	-0.795981	1.38157e-06
SLC29A1	-0.795634	0.0390242
ZNRF2	-0.795614	0.00119075
AFTPH	-0.795489	1.28286e-05
PSMC1	-0.795072	0.00975609
SSRP1	-0.794507	0.00158734
SWSAP1	-0.794102	0.0263209
HIPK1	-0.794096	0.000251114
MEGF9	-0.793825	0.000129833
CAMKK1	-0.793645	0.0424806
ESYT2	-0.793122	0.000199959
KDSR	-0.792904	0.000355774
ZNF622	-0.792329	0.0126335
TNFAIP1	-0.79226	0.000247447
TMED6	-0.792237	0.022655
NPDC1	-0.791972	0.0273099
PSMD11	-0.790702	0.0243358
RHOC	-0.790332	0.00679737
BCAS2	-0.790306	0.0168958
DPAGT1	-0.790156	0.00625672
EIF3A	-0.789943	0.0156831
BAK1	-0.78985	0.00456068
CTNNB1	-0.789617	0.00535751
ZNF185	-0.789532	0.0416055
PAK2	-0.789264	0.0010811
ABCB10	-0.789257	0.000102813
TAX1BP1	-0.789144	0.000259196
SLC36A1	-0.788974	0.00389561
YWHAH	-0.788711	0.00280034
PCDH1	-0.788629	0.00479301
SLC20A1	-0.78815	0.000619223
NECAP1	-0.78795	4.96762e-05
TBL3	-0.787908	0.00507442
CLN8	-0.787853	0.0116015
SNTB1	-0.787509	0.00726033
TMEM186	-0.787394	0.0169801
SMS	-0.787386	0.00972221
CDYL	-0.787341	0.000437398
PLEKHJ1	-0.78722	0.00381254
OSTM1	-0.787179	0.00190595
SAP18	-0.786861	0.0254787
UTP6	-0.786714	0.00221006
FAM8A1	-0.786508	0.00128901
GPN1	-0.78649	0.0233374
RYK	-0.786351	0.000778941
UEVLD	-0.786051	0.017465
SMIM3	-0.786002	0.00662351
RBM15B	-0.785983	0.000863661
ANKRD16	-0.78537	0.00142791
GGPS1	-0.785263	0.01519
CAPN15	-0.785011	0.00905905
CHUK	-0.78496	0.0021023
VEGFC	-0.784909	0.002569
XPR1	-0.784897	9.46835e-05
DUS3L	-0.784678	1.17281e-05
TKT	-0.784591	0.0153403
HSPA12B	-0.784007	0.000917995
MRPS23	-0.783996	0.00476448
TP53I11	-0.783937	0.0394139
PHB	-0.783593	0.0342562
CAB39	-0.78334	0.00396356
PIGT	-0.783263	0.00564461
CHMP4B	-0.782986	0.0111682
DDX52	-0.782926	1.64757e-06
NCOA1	-0.782899	0.000215098
MIDN	-0.782724	0.00166601
ZNF526	-0.782332	0.0102275
PRPS2	-0.782243	0.0106849
RANGRF	-0.781894	0.0169441
TMEM167A	-0.781785	3.3257e-07
PMPCA	-0.781588	0.0462557
C1D	-0.781553	0.000270259
PSMD2	-0.781325	0.0237564
SRA1	-0.781057	0.00198595
METTL16	-0.780897	0.0102354
TRAPPC9	-0.780777	0.0124801
LRP5	-0.780558	0.0113082
GALNT3	-0.780511	0.00533212
COG6	-0.779384	0.000863993
RAI1	-0.77879	0.01836
HMBS	-0.778252	0.00699055
TPST1	-0.777827	0.0290127
NEMP2	-0.77725	0.00338437
VPS53	-0.777176	0.00105402
ACOX1	-0.777042	3.07625e-06
ZNF25	-0.776918	0.000205659
HDGF	-0.776739	0.0105666
DERL2	-0.776591	0.00190595
MYH9	-0.77641	0.00812966
PDCD10	-0.77615	0.00959231
NUDT5	-0.775882	0.0100376
CHMP7	-0.775758	0.0250816
THUMPD1	-0.775428	0.00687509
DUSP3	-0.775196	0.0228706
UNC50	-0.774964	0.000164878
AP2B1	-0.774903	0.00103013
HIVEP1	-0.774835	0.00776053
PEMT	-0.774745	0.0300792
GPT2	-0.774713	0.0196832
NSDHL	-0.774694	0.00744122
PLEKHA3	-0.774518	0.000191592
ECHDC3	-0.773961	0.00121095
TAF13	-0.773929	0.00110431
DDX10	-0.773873	0.0347786
TOR1A	-0.773812	0.00673781
SPIDR	-0.773795	0.00576174
GPATCH3	-0.77372	0.00216272
CFAP20	-0.773372	0.018408
SAP30	-0.773293	0.046757
MAP11	-0.773223	0.0202814
NPLOC4	-0.77311	0.00978619
LGMN	-0.772858	0.0370611
RIOX2	-0.772551	0.00742523
GTF3C6	-0.772343	0.00594893
POLR3D	-0.772191	0.000350249
KIAA2013	-0.772027	0.0333822
EID1	-0.771225	0.0124588
PPP2R2A	-0.77122	0.00300901
RAP1B	-0.771122	0.00164985
C2CD2	-0.770861	0.000817354
TIMM50	-0.770598	0.0303022
BLVRA	-0.770577	0.00182054
SEC31A	-0.770485	0.00646003
PSMD9	-0.770451	0.000559407
MED30	-0.770338	0.00191712
SEMA6B	-0.770206	0.0362441
PFDN6	-0.77003	0.0188174
UTP20	-0.769933	0.0410038
WBP2	-0.769917	0.00617863
PIGX	-0.769483	0.00189612
ADI1	-0.769324	0.000247648
DAZAP2	-0.768868	0.00533212
NSUN6	-0.768652	0.035446
LDLRAP1	-0.768588	0.000816192
TMEM170A	-0.767617	0.0271637
DDX47	-0.767476	0.000523602
DNAJC11	-0.767314	0.0107885
KLF10	-0.767121	0.0102398
SLC25A46	-0.766908	2.02283e-05
PCYOX1	-0.766556	0.00308774
NUDT21	-0.766448	0.00299208
GAS2L1	-0.766242	0.00429238
GMDS	-0.76617	0.00736889
LIMK1	-0.766131	0.00971431
KRT19	-0.76603	0.00959513
RALGAPB	-0.765988	0.00234107
LRRC1	-0.765631	0.0164432
PLAGL2	-0.765494	0.0293874
ATP6V0E1	-0.765414	0.00433652
SMIM27	-0.765246	0.0100713
MPRIP	-0.764444	0.00601141
DOCK5	-0.763931	0.0089335
PPP1R26	-0.763769	0.00755652
EIF5	-0.763682	0.018679
JMJD6	-0.763002	0.00665527
UBTD2	-0.762022	0.029054
ZNF219	-0.761947	0.00750852
DEGS1	-0.761838	0.00374955
TEK	-0.761688	0.0419073
DHX29	-0.761474	0.0016784
SMIM19	-0.761097	0.0118204
XPNPEP1	-0.761056	0.0150134
ATP6V1E1	-0.760835	0.0132769
SECISBP2	-0.760741	0.0053257
CISD3	-0.75972	0.0246652
LEO1	-0.75963	0.0095263
SLC25A32	-0.759421	0.0102547
CBL	-0.7594	0.0181879
GNPDA2	-0.759341	0.0119955
RAB3GAP1	-0.759339	0.000562585
GCC1	-0.759192	0.0245191
SUMF2	-0.759104	0.0296909
TSPYL1	-0.759037	0.0290171
TSFM	-0.75893	0.00560258
DAP	-0.758915	0.00484261
MOB3C	-0.758894	0.00308319
SMIM10L1	-0.758856	0.00660899
DCHS1	-0.757673	0.0300061
LRRC8D	-0.757606	0.00673781
TGIF2	-0.757518	0.00109243
NAXE	-0.757393	0.0417119
KLHL11	-0.757323	0.0355925
SRP14	-0.757237	0.00339491
CDC42EP4	-0.757019	0.0209632
KIAA1614	-0.75686	0.0425544
MAPKAPK3	-0.75681	0.000808414
ZNF668	-0.756771	0.00667595
EPB41L1	-0.756617	0.000548292
TTC37	-0.756505	0.0148694
NFKBIA	-0.756337	0.00173015
PITPNC1	-0.756254	0.0110007
PRSS36	-0.756161	0.0258326
CLEC16A	-0.756067	0.00939214
TRAP1	-0.755918	0.0119511
AP1G1	-0.75533	0.000130697
PFAS	-0.754812	0.0108232
TGFB1I1	-0.754709	0.0119489
CCNQ	-0.754293	0.000305204
PJA2	-0.75412	0.00794024
TCF20	-0.753841	0.00143555
CIPC	-0.753819	0.000215098
CLP1	-0.753072	1.2659e-05
SIGMAR1	-0.753025	0.000733195
POLR1C	-0.752734	0.036919
BET1L	-0.751584	0.00323983
STK26	-0.751223	0.0174119
SPINT1	-0.751137	0.00696256
MIEN1	-0.750777	0.0423387
TM4SF1	-0.750729	0.00549851
SOCS4	-0.750515	0.00103882
MGAT5	-0.749714	0.0285566
KLF16	-0.749581	0.000231455
GNG7	-0.74885	0.0477297
EPN2	-0.747661	0.00586158
PIBF1	-0.747634	0.00359994
UBE2E1	-0.747572	0.00127377
GOLGB1	-0.747473	0.00945322
RIPOR1	-0.747435	0.00248653
GOLM1	-0.747432	0.00877786
PLCB1	-0.746484	0.0272691
PRELID3B	-0.746472	0.0175181
TMEM106C	-0.74622	0.0136206
GNL2	-0.746129	0.0153403
MLF2	-0.745765	0.00180451
PYCR2	-0.745494	0.00748048
CSNK1D	-0.745422	0.000105255
CLPTM1	-0.745402	0.00436267
PLBD2	-0.745228	0.000514425
NUBP1	-0.745033	0.0148066
GSPT2	-0.743964	0.0188506
FARSA	-0.743757	0.043954
RASSF8	-0.743703	0.00601141
CCM2	-0.743442	0.00343386
POLR2E	-0.743114	0.0112601
TMEM120B	-0.742678	0.0147876
C1GALT1C1	-0.742551	0.00417198
GALNT11	-0.742144	0.0129142
NOC4L	-0.742108	0.0493589
KDM4A	-0.741822	0.00484261
UAP1	-0.741614	0.00375077
PWP1	-0.741395	0.00306425
VSIR	-0.740951	0.00979887
AAR2	-0.740461	0.0245799
TOX4	-0.740255	7.23262e-05
EIF2B5	-0.740049	8.40185e-06
DIABLO	-0.738796	0.0206412
SLC30A5	-0.738685	0.012481
DHODH	-0.73867	0.0126335
GMFB	-0.738532	0.00154366
WDR33	-0.738249	6.43011e-07
BTG1	-0.738118	0.0441043
AP1M2	-0.737893	0.0107353
RCC1	-0.737789	0.0293874
CRYGS	-0.737455	0.0278501
DPM1	-0.737439	0.0256333
ESS2	-0.737266	0.00425585
SLC25A39	-0.737127	0.0153449
SNUPN	-0.73706	0.000844479
XRN2	-0.736912	0.00583678
HSP90AA1	-0.73626	0.0220804
HEBP2	-0.736183	0.00730367
TMEM104	-0.735908	0.0315897
TBC1D24	-0.735563	0.0050025
OTUD6B	-0.735513	0.0202929
YIPF5	-0.735279	0.0180832
MORC4	-0.735094	0.0294386
SP2	-0.735079	0.00535751
RNF11	-0.73454	0.0154275
BLOC1S6	-0.734203	0.0252182
PSMD7	-0.734186	0.0404641
RCBTB1	-0.733814	0.0210761
TES	-0.733459	0.0439737
SH3RF3	-0.733135	0.00418891
NDEL1	-0.732939	3.52266e-05
ZFYVE21	-0.732829	0.0108029
PIGQ	-0.732485	0.00382346
CDC42BPB	-0.732474	0.000123748
NAV2	-0.731563	0.00417657
AMFR	-0.731553	0.000353713
IRF2BP1	-0.731409	0.012618
OXCT1	-0.731399	0.033796
DUSP11	-0.731369	0.00355067
SNAPC5	-0.731296	0.00409854
PEX13	-0.731007	0.0220085
CREBZF	-0.730918	9.35644e-05
EIF4ENIF1	-0.730899	0.000280328
ZZEF1	-0.730737	0.000579914
YWHAZ	-0.730607	0.00010661
ABCE1	-0.730251	0.0102275
IFNAR1	-0.73002	0.019529
FBXL14	-0.730018	0.0440814
LSG1	-0.729808	0.00174101
FDX1	-0.729508	0.0393586
KLC2	-0.728955	0.0240096
TMX2	-0.728266	0.0278501
RGS12	-0.727897	0.0481284
ALG12	-0.727745	0.0274624
NUDCD3	-0.727692	0.00661842
SLC39A1	-0.727649	0.0269809
FASTKD3	-0.727368	0.0081204
ACTR1B	-0.72673	0.000844479
ATP6V1G1	-0.726207	0.000580556
MAPK1	-0.725863	0.00881626
KLHDC4	-0.72547	0.000187911
IKBIP	-0.725091	0.0347854
CHERP	-0.724633	0.00158734
GNA11	-0.724607	0.000976063
SVIP	-0.724256	0.00355067
PRDX2	-0.723949	0.00520497
SHMT2	-0.723225	0.0137897
UBE2D3	-0.722992	0.0170118
WDR5	-0.722863	0.00601141
NOL10	-0.722574	0.00661662
UBC	-0.721937	0.0209632
PFDN2	-0.721888	0.0385856
PDE1B	-0.721786	0.0378364
KTN1	-0.721558	0.0157588
UVRAG	-0.721538	0.00959231
AKAP17A	-0.721446	0.00331759
PLOD3	-0.721095	0.00770563
CDC37	-0.721089	0.0300061
DCAF1	-0.72091	1.2659e-05
TOM1L2	-0.720902	0.00275147
TSNAX	-0.720473	0.000981348
CD164	-0.72032	0.00428448
B3GALT4	-0.719681	0.0259454
HEATR1	-0.719526	9.0224e-06
LGALS8	-0.719009	0.000498221
GAK	-0.718571	0.00450711
SMG5	-0.718256	0.0438286
FNBP4	-0.718095	1.16324e-11
TPD52L2	-0.718075	0.00081761
PCSK7	-0.717789	0.028169
PDCD11	-0.717486	7.33141e-05
ERH	-0.717414	0.00557436
KIF13B	-0.7171	0.000280328
PIGW	-0.716959	0.00282338
UBQLN1	-0.71669	0.0316269
WIPF2	-0.716608	0.0345848
WASHC5	-0.716538	0.00353369
BRIX1	-0.71645	0.00236506
EFTUD2	-0.716349	0.00978668
CORO1C	-0.716203	0.000590176
RUNDC1	-0.716201	0.018368
PITRM1	-0.715785	0.0031347
OSBPL2	-0.715644	3.09573e-05
VAMP8	-0.715543	0.00909372
DHX37	-0.715484	0.00302732
TMEM98	-0.715419	0.0473761
CACYBP	-0.715237	0.0112928
SERINC4	-0.715167	0.00553354
TADA2B	-0.714728	0.0235476
SAMD8	-0.714678	0.0193293
EIF3L	-0.714514	0.0352947
SHC1	-0.714039	0.000992718
RMND5A	-0.714	0.0212254
CETN2	-0.713914	0.0104196
PAFAH1B2	-0.713902	0.00121621
TPR	-0.713735	0.00681488
ACTR8	-0.713555	0.0134565
SINHCAF	-0.713257	0.00157435
UBLCP1	-0.713255	0.000928273
AKT2	-0.712721	0.00937137
USP24	-0.712114	0.00737885
ADCY6	-0.711992	0.00905905
COPS3	-0.711518	0.00373814
DDX27	-0.71151	2.34892e-05
TAF9	-0.71149	0.0210761
BRD7	-0.710795	0.000125366
TOP2B	-0.710124	0.00207237
PDZD8	-0.710112	0.00978668
UBA2	-0.710015	2.27513e-05
PAFAH1B1	-0.70994	0.0101033
GNA13	-0.709871	0.000952152
SRSF3	-0.709784	0.000199039
ILF2	-0.709768	0.037711
PTCD3	-0.709509	0.0485578
PPIH	-0.709174	0.0012034
TRIP11	-0.708938	0.00507442
SLC25A33	-0.708884	0.00427063
DYNLL2	-0.708553	0.00701119
TCEAL4	-0.708404	0.0039418
COG2	-0.708088	0.00482237
HEATR3	-0.707806	0.0215332
ZNF667	-0.707797	0.00601239
DOCK1	-0.707459	0.00242358
WDR26	-0.707261	0.000466995
NSUN4	-0.707198	0.03939
WDR83	-0.707104	0.0482587
MFSD5	-0.706989	0.0201056
DHDDS	-0.706905	0.00176048
ZMAT2	-0.706686	0.0296949
ADK	-0.706646	0.0377943
RIC8A	-0.706591	0.0026286
ELP1	-0.706543	0.0224792
APP	-0.706341	0.0406623
ZDHHC5	-0.705931	0.00167322
RNF181	-0.705206	0.00905905
TMEM168	-0.705171	0.00137289
WDR36	-0.704895	0.00650613
YTHDF2	-0.704668	0.00246773
AP3S1	-0.704371	0.0427729
SUMO3	-0.704205	0.00119333
VTI1B	-0.703927	0.0270973
XRCC2	-0.703826	0.0481284
RAB7A	-0.703757	0.00729095
MTHFD1	-0.703676	0.0153806
PTPN1	-0.703641	0.000583987
VAMP2	-0.703432	0.0112601
ACP1	-0.703351	0.018163
TENT5C	-0.703262	0.0143473
ZNF74	-0.703015	0.0057773
TOR3A	-0.702995	0.028088
CPOX	-0.702882	0.0186484
CAPN7	-0.702772	0.00170557
EXOC8	-0.702687	0.00573512
KDM1B	-0.702549	0.00360963
DESI2	-0.702376	0.00681838
PITPNB	-0.702255	9.5591e-05
ZFYVE26	-0.70224	2.46649e-05
ACTR2	-0.702164	0.00477637
DNM1L	-0.701807	0.0348018
IER2	-0.701402	0.000441122
ACER3	-0.701327	0.00139545
SMARCA5	-0.701192	0.0115009
TGFBRAP1	-0.701115	9.51749e-06
BOD1	-0.700996	0.0186425
TCEAL1	-0.700989	0.00548529
DIAPH1	-0.700971	6.14506e-05
RPL18A	-0.700942	0.004418
NOP56	-0.700938	0.0194032
TMEM259	-0.70067	0.00104959
POGLUT1	-0.70065	0.0388599
LACC1	-0.699693	0.0430864
TOR1B	-0.699129	0.00650613
NAB2	-0.699099	0.0363701
UHRF1BP1	-0.69905	0.00290565
NCDN	-0.698804	0.0475728
TM2D1	-0.698341	0.0152555
IMPAD1	-0.69833	0.00184248
VPS35	-0.69802	0.0101519
TBC1D8B	-0.697983	0.00189865
DCUN1D5	-0.697915	0.0263209
DPH1	-0.69786	0.00401128
ABCF3	-0.697775	0.00608551
MFSD14B	-0.697681	0.0102275
BLOC1S5	-0.697678	0.0331352
ZCCHC14	-0.697549	0.0248275
EFCAB14	-0.697138	0.00614019
AKIRIN2	-0.696819	0.0235103
LHPP	-0.696802	0.0108245
SAV1	-0.696595	0.0486161
SLC6A8	-0.696553	0.0428901
YTHDC2	-0.696336	0.0106713
PARP1	-0.696226	0.0305568
JMY	-0.696103	0.0123849
[truncated: 674 more rows]
