# Supplementary material for: RNAseq Analysis of Brown Adipose Tissue and Thyroid of Newborn Lambs Subjected to Short-Term Cold Exposure Reveals Signs of Early Whitening of Adipose Tissue
Source: Metabolites. 2022 Oct 20;12(10):996. doi: 10.3390/metabo12100996 (PMC9607389; doi:10.3390/metabo12100996)
Supplement: Supplementary file 1 [file metabolites-12-00996-s001.zip › Additional file 5. Table S4. GO terms and Pathways per tissue-treatment.xlsx]

## Sheet: BAT cold UP
source	term_name	term_id	FDR	intersection_size	intersections
GO:MF	microtubule binding	GO:0008017	3.577e-08	20	GAS2L2,MX1,KIF4A,CENPF,CENPE,KIF2C,DLGAP5,NUSAP1,KIF23,PPP5C,BIRC5,KIF20A,RACGAP1,KIF22,KIFC1,KIF15,KIF11,PRC1,KNSTRN,MAST1
GO:MF	tubulin binding	GO:0015631	1.81958e-07	22	GAS2L2,MX1,KIF4A,CENPF,CENPE,KIF2C,DLGAP5,NUSAP1,KIF23,PPP5C,BIRC5,KIF20A,RACGAP1,KIF22,KIFC1,KIF15,KIF11,BRCA1,PRC1,TPPP2,KNSTRN,MAST1
GO:MF	ATP-dependent microtubule motor activity	GO:1990939	5.45429e-07	9	KIF4A,CENPE,KIF2C,KIF23,KIF20A,KIF22,KIFC1,KIF15,KIF11
GO:MF	microtubule motor activity	GO:0003777	1.12427e-06	9	KIF4A,CENPE,KIF2C,KIF23,KIF20A,KIF22,KIFC1,KIF15,KIF11
GO:MF	motor activity	GO:0003774	0.000112206	9	KIF4A,CENPE,KIF2C,KIF23,KIF20A,KIF22,KIFC1,KIF15,KIF11
GO:MF	extracellular matrix structural constituent	GO:0005201	0.00032436	13	FMOD,COL28A1,ACAN,FN1,COL4A6,CILP,NPNT,COL21A1,SRPX,MGP,COL18A1,ABI3BP,AGRN
GO:MF	carbohydrate derivative binding	GO:0097367	0.00032436	41	CXCL10,MX1,ABCC8,TDRD9,CCN5,KIF4A,TTK,BUB1B,CAMK2B,CDK1,CENPE,CCN4,ACAN,IFI44L,UBE2C,KIF2C,GBP6,HMMR,TOP2A,AURKA,ACSS3,NLRC5,VIT,MKI67,FN1,DHX58,BUB1,KIF23,ABCB1,PPP5C,KIF20A,NOD2,KIF22,KIFC1,RASL10B,NEK2,KIF15,CIITA,UBE2L6,KIF11,EIF2AK2
GO:MF	ATPase	GO:0016887	0.00032436	19	ABCC8,TDRD9,KIF4A,CENPE,KIF2C,TOP2A,RNF213,DHX58,KIF23,ABCB1,KIF20A,KIF22,KIFC1,KIF15,KIF11,DDX58,ZNFX1,RAD54L,IFIH1
GO:MF	ATP binding	GO:0005524	0.00103022	30	ABCC8,TDRD9,KIF4A,TTK,BUB1B,CAMK2B,CDK1,CENPE,UBE2C,KIF2C,TOP2A,AURKA,ACSS3,NLRC5,MKI67,DHX58,BUB1,KIF23,ABCB1,PPP5C,KIF20A,NOD2,KIF22,KIFC1,NEK2,KIF15,CIITA,UBE2L6,KIF11,EIF2AK2
GO:MF	purine ribonucleoside triphosphate binding	GO:0035639	0.00125614	34	MX1,ABCC8,TDRD9,KIF4A,TTK,BUB1B,CAMK2B,CDK1,CENPE,IFI44L,UBE2C,KIF2C,GBP6,TOP2A,AURKA,ACSS3,NLRC5,MKI67,DHX58,BUB1,KIF23,ABCB1,PPP5C,KIF20A,NOD2,KIF22,KIFC1,RASL10B,NEK2,KIF15,CIITA,UBE2L6,KIF11,EIF2AK2
GO:MF	adenyl ribonucleotide binding	GO:0032559	0.00180242	30	ABCC8,TDRD9,KIF4A,TTK,BUB1B,CAMK2B,CDK1,CENPE,UBE2C,KIF2C,TOP2A,AURKA,ACSS3,NLRC5,MKI67,DHX58,BUB1,KIF23,ABCB1,PPP5C,KIF20A,NOD2,KIF22,KIFC1,NEK2,KIF15,CIITA,UBE2L6,KIF11,EIF2AK2
GO:MF	cytoskeletal protein binding	GO:0008092	0.00180242	27	GAS2L2,MX1,KIF4A,CENPF,CAMK2B,CENPE,KIF2C,ANLN,DLGAP5,NUSAP1,KIF23,PPP5C,BIRC5,KIF20A,RACGAP1,NOD2,KIF22,IQGAP3,KIFC1,KIF15,KIF11,BRCA1,PRC1,TPPP2,CAPN3,KNSTRN,MAST1
GO:MF	nucleotide binding	GO:0000166	0.00180334	37	MX1,ABCC8,TDRD9,KIF4A,TTK,BUB1B,CAMK2B,CDK1,CENPE,IFI44L,UBE2C,KIF2C,GBP6,TOP2A,AURKA,ACSS3,FMO2,NLRC5,MKI67,DHX58,BUB1,KIF23,ABCB1,PPP5C,KIF20A,AOX1,NOD2,KIF22,KIFC1,RASL10B,NT5C,NEK2,KIF15,CIITA,UBE2L6,KIF11,EIF2AK2
GO:MF	adenyl nucleotide binding	GO:0030554	0.00180334	30	ABCC8,TDRD9,KIF4A,TTK,BUB1B,CAMK2B,CDK1,CENPE,UBE2C,KIF2C,TOP2A,AURKA,ACSS3,NLRC5,MKI67,DHX58,BUB1,KIF23,ABCB1,PPP5C,KIF20A,NOD2,KIF22,KIFC1,NEK2,KIF15,CIITA,UBE2L6,KIF11,EIF2AK2
GO:MF	nucleoside phosphate binding	GO:1901265	0.00180334	37	MX1,ABCC8,TDRD9,KIF4A,TTK,BUB1B,CAMK2B,CDK1,CENPE,IFI44L,UBE2C,KIF2C,GBP6,TOP2A,AURKA,ACSS3,FMO2,NLRC5,MKI67,DHX58,BUB1,KIF23,ABCB1,PPP5C,KIF20A,AOX1,NOD2,KIF22,KIFC1,RASL10B,NT5C,NEK2,KIF15,CIITA,UBE2L6,KIF11,EIF2AK2
GO:MF	purine ribonucleotide binding	GO:0032555	0.00180334	34	MX1,ABCC8,TDRD9,KIF4A,TTK,BUB1B,CAMK2B,CDK1,CENPE,IFI44L,UBE2C,KIF2C,GBP6,TOP2A,AURKA,ACSS3,NLRC5,MKI67,DHX58,BUB1,KIF23,ABCB1,PPP5C,KIF20A,NOD2,KIF22,KIFC1,RASL10B,NEK2,KIF15,CIITA,UBE2L6,KIF11,EIF2AK2
GO:MF	ribonucleotide binding	GO:0032553	0.00182708	34	MX1,ABCC8,TDRD9,KIF4A,TTK,BUB1B,CAMK2B,CDK1,CENPE,IFI44L,UBE2C,KIF2C,GBP6,TOP2A,AURKA,ACSS3,NLRC5,MKI67,DHX58,BUB1,KIF23,ABCB1,PPP5C,KIF20A,NOD2,KIF22,KIFC1,RASL10B,NEK2,KIF15,CIITA,UBE2L6,KIF11,EIF2AK2
GO:MF	purine nucleotide binding	GO:0017076	0.00182708	34	MX1,ABCC8,TDRD9,KIF4A,TTK,BUB1B,CAMK2B,CDK1,CENPE,IFI44L,UBE2C,KIF2C,GBP6,TOP2A,AURKA,ACSS3,NLRC5,MKI67,DHX58,BUB1,KIF23,ABCB1,PPP5C,KIF20A,NOD2,KIF22,KIFC1,RASL10B,NEK2,KIF15,CIITA,UBE2L6,KIF11,EIF2AK2
GO:MF	flavonoid 3'-monooxygenase activity	GO:0016711	0.00228796	1	CYP1A1
GO:MF	anion binding	GO:0043168	0.00257946	39	MX1,ABCC8,FFAR4,GSTA1,TDRD9,KIF4A,TTK,BUB1B,CAMK2B,CDK1,CENPE,IFI44L,UBE2C,KIF2C,GBP6,TOP2A,AURKA,ACSS3,FMO2,NLRC5,MKI67,DHX58,BUB1,KIF23,ABCB1,PPP5C,KIF20A,RACGAP1,AOX1,NOD2,KIF22,KIFC1,RASL10B,NEK2,KIF15,CIITA,UBE2L6,KIF11,EIF2AK2
GO:MF	metallodipeptidase activity	GO:0070573	0.00308079	2	DPEP3,DPEP2
GO:MF	kinetochore binding	GO:0043515	0.00355652	2	TTK,CENPE
GO:MF	glycine N-benzoyltransferase activity	GO:0047962	0.00378011	1	GLYAT
GO:MF	glycosaminoglycan binding	GO:0005539	0.00446275	7	CXCL10,CCN5,CCN4,ACAN,HMMR,VIT,FN1
GO:MF	vitamin D 24-hydroxylase activity	GO:0070576	0.00501592	1	CYP1A1
GO:MF	insulin-like growth factor binding	GO:0005520	0.00501592	4	CCN5,CCN4,KAZALD1,ITGB4
GO:MF	estrogen 2-hydroxylase activity	GO:0101021	0.00805024	1	CYP1A1
GO:MF	nucleoside-triphosphatase activity	GO:0017111	0.00869935	12	MX1,KIF4A,CENPE,KIF2C,GBP6,KIF23,KIF20A,KIF22,KIFC1,RASL10B,KIF15,KIF11
GO:MF	heme binding	GO:0020037	0.00889528	2	CYP1A1,IDO1
GO:MF	dipeptidase activity	GO:0016805	0.00889528	2	DPEP3,DPEP2
GO:MF	asparaginase activity	GO:0004067	0.00889528	1	ASPG
GO:MF	small molecule binding	GO:0036094	0.00889528	38	CYP1A1,MX1,ABCC8,TDRD9,KIF4A,TTK,BUB1B,CAMK2B,CDK1,CENPE,IFI44L,UBE2C,KIF2C,GBP6,TOP2A,AURKA,ACSS3,FMO2,NLRC5,MKI67,DHX58,BUB1,KIF23,ABCB1,PPP5C,KIF20A,AOX1,NOD2,KIF22,KIFC1,RASL10B,NT5C,NEK2,KIF15,CIITA,UBE2L6,KIF11,EIF2AK2
GO:MF	indoleamine 2,3-dioxygenase activity	GO:0033754	0.00918691	1	IDO1
GO:MF	ubiquitin-like protein ligase binding	GO:0044389	0.00918691	14	ISG15,SLC22A18,UBE2C,AURKA,ABCB1,UCHL1,UBE2L6,CCNB1,BRCA1,DDX58,STAT1,PML,PARP9,LAPTM5
GO:MF	tetrapyrrole binding	GO:0046906	0.00918691	2	CYP1A1,IDO1
GO:MF	acyltransferase activity, transferring groups other than amino-acyl groups	GO:0016747	0.00918691	2	GLYAT,ASPG
GO:MF	hydroperoxy icosatetraenoate dehydratase activity	GO:0106256	0.00918691	1	CYP1A1
GO:MF	estrogen 16-alpha-hydroxylase activity	GO:0101020	0.00918691	1	CYP1A1
GO:MF	oxidoreductase activity, acting on diphenols and related substances as donors	GO:0016679	0.0108678	1	CYP1A1
GO:MF	glycine N-acyltransferase activity	GO:0047961	0.0108678	1	GLYAT
GO:MF	acyltransferase activity	GO:0016746	0.0109306	2	GLYAT,ASPG
GO:MF	fatty acid binding	GO:0005504	0.0109498	2	FFAR4,GSTA1
GO:MF	bile acid receptor activity	GO:0038181	0.0118538	2	GPBAR1,VDR
GO:MF	tryptophan 2,3-dioxygenase activity	GO:0004833	0.0118539	1	IDO1
GO:MF	pyrophosphatase activity	GO:0016462	0.0168048	12	MX1,KIF4A,CENPE,KIF2C,GBP6,KIF23,KIF20A,KIF22,KIFC1,RASL10B,KIF15,KIF11
GO:MF	double-stranded RNA binding	GO:0003725	0.0184782	5	DHX58,ZBP1,EIF2AK2,DDX58,IFIH1
GO:MF	cyclin-dependent protein serine/threonine kinase regulator activity	GO:0016538	0.0184782	4	CDKN2C,CCNB1,CCNB3,CKS2
GO:MF	arachidonic acid monooxygenase activity	GO:0008391	0.0184782	1	CYP1A1
GO:MF	hydrolase activity, acting on acid anhydrides	GO:0016817	0.0184782	12	MX1,KIF4A,CENPE,KIF2C,GBP6,KIF23,KIF20A,KIF22,KIFC1,RASL10B,KIF15,KIF11
GO:MF	integrin binding	GO:0005178	0.0184782	7	ISG15,CCN5,CCN4,FN1,SFRP2,ITGB4,NPNT
GO:MF	hydrolase activity, acting on acid anhydrides, in phosphorus-containing anhydrides	GO:0016818	0.0184782	12	MX1,KIF4A,CENPE,KIF2C,GBP6,KIF23,KIF20A,KIF22,KIFC1,RASL10B,KIF15,KIF11
GO:MF	1-alkyl-2-acetylglycerophosphocholine esterase activity	GO:0003847	0.0200561	1	ASPG
GO:MF	aromatase activity	GO:0070330	0.0205053	1	CYP1A1
GO:MF	sulfonylurea receptor activity	GO:0008281	0.0209239	1	ABCC8
GO:MF	intramembrane lipid transporter activity	GO:0140303	0.023197	4	ABCB1,PLSCR1,ANO3,ATP8B4
GO:MF	protein C-terminus binding	GO:0008022	0.0236955	7	CENPF,CDC20,TOP2A,MKI67,FN1,MAD2L1,CIITA
GO:MF	histone kinase activity	GO:0035173	0.0241872	2	CDK1,AURKA
GO:MF	phosphatidyl phospholipase B activity	GO:0102545	0.0247204	1	ASPG
GO:MF	extracellular matrix structural constituent conferring compression resistance	GO:0030021	0.0251301	2	FMOD,ACAN
GO:MF	complement component C3a receptor activity	GO:0004876	0.0251318	1	C3AR1
GO:MF	CXCR3 chemokine receptor binding	GO:0048248	0.0251318	1	CXCL10
GO:MF	monocarboxylic acid binding	GO:0033293	0.0251318	2	FFAR4,GSTA1
GO:MF	steroid hydroxylase activity	GO:0008395	0.0251318	1	CYP1A1
GO:MF	oxidoreductase activity, acting on paired donors, with incorporation or reduction of molecular oxygen, reduced flavin or flavoprotein as one donor, and incorporation of one atom of oxygen	GO:0016712	0.0251318	1	CYP1A1
GO:MF	oxygen binding	GO:0019825	0.0260828	1	CYP1A1
GO:MF	demethylase activity	GO:0032451	0.0263343	1	CYP1A1
GO:MF	anaphase-promoting complex binding	GO:0010997	0.0263343	2	CDC20,CLSPN
GO:MF	Hsp70 protein binding	GO:0030544	0.0267038	1	CYP1A1
GO:MF	growth hormone secretagogue receptor activity	GO:0001616	0.0267038	1	GHSR
GO:MF	Hsp90 protein binding	GO:0051879	0.0267038	1	CYP1A1
GO:MF	ATPase, acting on DNA	GO:0008094	0.0290241	7	TDRD9,TOP2A,DHX58,DDX58,ZNFX1,RAD54L,IFIH1
GO:MF	enzyme binding	GO:0019899	0.0290241	33	CYP1A1,ISG15,SLC22A18,CDC20,FOXM1,UBE2C,TOP2A,AURKA,BANK1,FN1,ABCB1,PITPNM3,BIRC5,KIF20A,RACGAP1,CDKN2C,NOXO1,NOD2,UCHL1,IQGAP3,NEK2,PARP14,UBE2L6,KIF11,SORL1,ZMYND15,CCNB1,BRCA1,CCNB3,PRC1,DDX58,PIK3IP1,CKS2
GO:MF	oxidoreductase activity, acting on paired donors, with incorporation or reduction of molecular oxygen, NAD(P)H as one donor, and incorporation of one atom of oxygen	GO:0016709	0.0291794	1	CYP1A1
GO:MF	extracellular matrix structural constituent conferring tensile strength	GO:0030020	0.0303403	4	COL28A1,COL4A6,COL21A1,COL18A1
GO:MF	superoxide-generating NADPH oxidase activator activity	GO:0016176	0.030592	2	NOXO1,NCF4
GO:MF	hexosaminidase activity	GO:0015929	0.0315145	3	GM2A,HYAL1,HEXB
GO:MF	cyclin-dependent protein serine/threonine kinase activator activity	GO:0061575	0.0342676	2	CCNB1,CKS2
GO:MF	hydro-lyase activity	GO:0016836	0.0356687	1	CYP1A1
GO:MF	steroid delta-isomerase activity	GO:0004769	0.0373703	1	GSTA1
GO:MF	cAMP-dependent protein kinase regulator activity	GO:0008603	0.0379824	1	CXCL10
GO:MF	lysophospholipase activity	GO:0004622	0.0385936	1	ASPG
GO:MF	protein tag	GO:0031386	0.0394274	1	ISG15
GO:MF	ATP-activated inward rectifier potassium channel activity	GO:0015272	0.0394274	1	ABCC8
GO:MF	protein serine kinase activity	GO:0106310	0.0394274	9	TTK,BUB1B,CAMK2B,CDK1,AURKA,BUB1,NEK2,CIITA,EIF2AK2
GO:MF	protein threonine kinase activity	GO:0106311	0.0394274	9	TTK,BUB1B,CAMK2B,CDK1,AURKA,BUB1,NEK2,CIITA,EIF2AK2
GO:MF	MCM complex binding	GO:1904931	0.0394274	1	NEIL3
GO:MF	carbon-oxygen lyase activity	GO:0016835	0.0399736	1	CYP1A1
GO:MF	metallopeptidase activity	GO:0008237	0.0407428	8	DPEP3,DPEP2,XPNPEP2,ADAMTS6,TLL1,MMP28,ADAMTSL2,CPQ
GO:MF	beta-N-acetylhexosaminidase activity	GO:0004563	0.0431178	2	GM2A,HEXB
GO:MF	left-handed Z-DNA binding	GO:0003692	0.0431178	1	ZBP1
GO:MF	hyaluronic acid binding	GO:0005540	0.0431178	2	ACAN,HMMR
GO:MF	hydrolase activity	GO:0016787	0.0431178	40	ASPG,PRSS35,DPEP3,MX1,TDRD9,KIF4A,RHBDL1,DPEP2,CENPE,CFB,KIF2C,GBP6,NEIL3,RNF213,DHX58,KIF23,PITPNM3,PTER,CDKN3,PPP5C,XPNPEP2,ADAMTS6,KIF20A,KIF22,UCHL1,KIFC1,RASL10B,F2RL2,NT5C,KIF15,KIF11,DDX58,PIK3IP1,RAD54L,IFIH1,TLL1,EPHX1,CAPN3,PLA2G7,MMP28
GO:MF	leucine binding	GO:0070728	0.0433596	2	SESN3,SESN1
GO:MF	G protein-coupled bile acid receptor activity	GO:0038182	0.0433596	1	GPBAR1
GO:MF	DNA secondary structure binding	GO:0000217	0.0437177	4	NEIL3,CLSPN,GEN1,HMGB2
GO:MF	oxidoreductase activity, acting on single donors with incorporation of molecular oxygen, incorporation of two atoms of oxygen	GO:0016702	0.0469994	1	IDO1
GO:MF	monooxygenase activity	GO:0004497	0.0475047	1	CYP1A1
GO:MF	oxidoreductase activity, acting on single donors with incorporation of molecular oxygen	GO:0016701	0.0478072	1	IDO1
GO:MF	helicase activity	GO:0004386	0.048292	6	TDRD9,DHX58,DDX58,ZNFX1,RAD54L,IFIH1
GO:MF	phospholipid transporter activity	GO:0005548	0.0490851	4	ABCB1,PITPNM3,PLSCR1,ANO3
GO:BP	mitotic spindle organization	GO:0007052	7.24853e-22	28	KIF4A,CENPF,TTK,BUB1B,SPC24,CENPE,NDC80,CDC20,CDCA8,KIF2C,CENPA,AURKA,DLGAP5,KNL1,BUB1,KIF23,NUF2,BIRC5,CENPT,RACGAP1,CENPN,MAD2L1,KNTC1,KIFC1,NEK2,KIF11,CCNB1,PRC1
GO:BP	microtubule cytoskeleton organization involved in mitosis	GO:1902850	7.24853e-22	29	KIF4A,CENPF,TTK,BUB1B,SPC24,CENPE,NDC80,CDC20,CDCA8,KIF2C,CENPA,AURKA,DLGAP5,KNL1,NUSAP1,BUB1,KIF23,NUF2,BIRC5,CENPT,RACGAP1,CENPN,MAD2L1,KNTC1,KIFC1,NEK2,KIF11,CCNB1,PRC1
GO:BP	cell division	GO:0051301	7.24853e-22	47	CENPW,KIF4A,CENPF,ASPM,BUB1B,SPC24,CDK1,CENPE,STOX1,NDC80,CDC20,CEP55,CDCA8,UBE2C,KIF2C,CKAP2,ANLN,CENPA,TOP2A,AURKA,KNL1,NUSAP1,BUB1,CDCA3,KIF23,NUF2,BIRC5,CENPT,SUSD2,KIF20A,RACGAP1,MAD2L1,MIS18BP1,KNTC1,KIFC1,SFRP2,NEK2,KIF11,SKA3,CCNB1,CCNB3,PRC1,CKS2,MDK,MLLT3,SGO1,KNSTRN
GO:BP	chromosome segregation	GO:0007059	1.87197e-21	39	CENPW,KIF4A,CENPF,TTK,BUB1B,CDK1,CENPE,NDC80,CDC20,CDCA8,UBE2C,HJURP,KIF2C,TOP2A,DLGAP5,KNL1,MKI67,NUSAP1,BUB1,KIF23,NUF2,BIRC5,CENPT,RACGAP1,CENPN,MAD2L1,KIF22,KNTC1,KIFC1,NEK2,SKA3,CCNB1,BRCA1,PRC1,SGO1,KNSTRN,PLSCR1,SMC2,PTTG1
GO:BP	mitotic cell cycle	GO:0000278	1.37944e-20	53	CYP1A1,CENPW,KIF4A,CENPF,TTK,BUB1B,SPC24,CDK1,CENPE,STOX1,NDC80,CDC20,CEP55,FOXM1,CDCA8,UBE2C,KIF2C,CKAP2,ANLN,HMMR,CENPA,AURKA,DLGAP5,KNL1,MKI67,NUSAP1,BUB1,KIF23,ABCB1,NUF2,CDKN3,PPP5C,BIRC5,CENPT,KIF20A,RACGAP1,CDKN2C,CENPN,MAD2L1,RRM2,KIF22,IQGAP3,KNTC1,KIFC1,NEK2,KIF15,KIF11,SKA3,CCNB1,CLSPN,BRCA1,CCNB3,PRC1
GO:BP	spindle organization	GO:0007051	4.17382e-20	31	KIF4A,CENPF,ASPM,TTK,BUB1B,SPC24,CENPE,NDC80,CDC20,CDCA8,KIF2C,CENPA,AURKA,DLGAP5,KNL1,BUB1,KIF23,NUF2,BIRC5,CENPT,RACGAP1,CENPN,MAD2L1,KNTC1,KIFC1,NEK2,KIF11,CCNB1,PRC1,SGO1,KNSTRN
GO:BP	mitotic cell cycle process	GO:1903047	5.44969e-20	49	CYP1A1,KIF4A,CENPF,TTK,BUB1B,SPC24,CDK1,CENPE,STOX1,NDC80,CDC20,CEP55,FOXM1,CDCA8,UBE2C,KIF2C,CKAP2,ANLN,HMMR,CENPA,AURKA,DLGAP5,KNL1,MKI67,NUSAP1,BUB1,KIF23,ABCB1,NUF2,CDKN3,BIRC5,CENPT,KIF20A,RACGAP1,CDKN2C,CENPN,MAD2L1,RRM2,KIF22,IQGAP3,KNTC1,KIFC1,NEK2,KIF11,CCNB1,CLSPN,BRCA1,CCNB3,PRC1
GO:BP	mitotic sister chromatid segregation	GO:0000070	8.79506e-19	28	KIF4A,CENPF,TTK,BUB1B,CDK1,CENPE,NDC80,CDC20,CDCA8,UBE2C,KIF2C,DLGAP5,NUSAP1,BUB1,KIF23,NUF2,RACGAP1,MAD2L1,KIF22,KNTC1,KIFC1,NEK2,CCNB1,PRC1,SGO1,KNSTRN,SMC2,PTTG1
GO:BP	sister chromatid segregation	GO:0000819	3.47037e-18	29	KIF4A,CENPF,TTK,BUB1B,CDK1,CENPE,NDC80,CDC20,CDCA8,UBE2C,KIF2C,TOP2A,DLGAP5,NUSAP1,BUB1,KIF23,NUF2,RACGAP1,MAD2L1,KIF22,KNTC1,KIFC1,NEK2,CCNB1,PRC1,SGO1,KNSTRN,SMC2,PTTG1
GO:BP	cell cycle process	GO:0022402	2.29657e-17	56	CYP1A1,TDRD9,KIF4A,CENPF,ASPM,TTK,BUB1B,SPC24,CDK1,CENPE,STOX1,NDC80,CDC20,CEP55,FOXM1,CDCA8,UBE2C,KIF2C,CKAP2,PCLAF,ANLN,HMMR,CENPA,TOP2A,AURKA,DLGAP5,KNL1,MKI67,NUSAP1,BUB1,KIF23,ABCB1,NUF2,CDKN3,BIRC5,CENPT,SUSD2,KIF20A,RACGAP1,CDKN2C,CENPN,MAD2L1,RRM2,KIF22,IQGAP3,KNTC1,KIFC1,NEK2,KIF11,CCNB1,CLSPN,BRCA1,CCNB3,PRC1,CKS2,RAD54L
GO:BP	cell cycle	GO:0007049	4.16576e-16	63	CYP1A1,TDRD9,CENPW,KIF4A,CENPF,ASPM,TTK,BUB1B,SPC24,CDK1,CENPE,STOX1,NDC80,CDC20,CEP55,FOXM1,CDCA8,UBE2C,HJURP,KIF2C,CKAP2,PCLAF,ANLN,HMMR,CENPA,TOP2A,AURKA,DLGAP5,KNL1,MKI67,NUSAP1,BUB1,CDCA3,KIF23,ABCB1,NUF2,CDKN3,PPP5C,BIRC5,CENPT,SUSD2,KIF20A,RACGAP1,CDKN2C,CENPN,MAD2L1,MIS18BP1,RRM2,KIF22,IQGAP3,KNTC1,KIFC1,NEK2,KIF15,KIF11,SKA3,CCNB1,CLSPN,BRCA1,CCNB3,PRC1,CKS2,RAD54L
GO:BP	nuclear division	GO:0000280	4.7538e-16	41	TDRD9,KIF4A,CENPF,ASPM,TTK,BUB1B,CDK1,CENPE,NDC80,CDC20,CDCA8,UBE2C,KIF2C,ANLN,TOP2A,AURKA,DLGAP5,MKI67,NUSAP1,BUB1,KIF23,NUF2,RACGAP1,MAD2L1,KIF22,KNTC1,KIFC1,NEK2,KIF11,CCNB1,PRC1,CKS2,RAD54L,SGO1,KNSTRN,WNT5A,SMC2,PTTG1,CDC25B,GEN1,EDN1
GO:BP	microtubule cytoskeleton organization	GO:0000226	8.43726e-16	37	GAS2L2,KIF4A,CENPF,ASPM,TTK,BUB1B,SPC24,CDK1,CENPE,NDC80,CDC20,CDCA8,KIF2C,CKAP2,PCLAF,CENPA,AURKA,DLGAP5,KNL1,NUSAP1,BUB1,KIF23,NUF2,BIRC5,CENPT,KIF20A,RACGAP1,CENPN,MAD2L1,KNTC1,KIFC1,NEK2,KIF11,SKA3,CCNB1,BRCA1,PRC1
GO:BP	mitotic nuclear division	GO:0140014	1.2791e-15	28	KIF4A,CENPF,TTK,BUB1B,CDK1,CENPE,NDC80,CDC20,CDCA8,UBE2C,KIF2C,ANLN,AURKA,DLGAP5,MKI67,NUSAP1,BUB1,KIF23,NUF2,RACGAP1,MAD2L1,KIF22,KNTC1,KIFC1,NEK2,KIF11,CCNB1,PRC1
GO:BP	nuclear chromosome segregation	GO:0098813	1.39767e-15	30	KIF4A,CENPF,TTK,BUB1B,CDK1,CENPE,NDC80,CDC20,CDCA8,UBE2C,KIF2C,TOP2A,DLGAP5,KNL1,NUSAP1,BUB1,KIF23,NUF2,RACGAP1,MAD2L1,KIF22,KNTC1,KIFC1,NEK2,CCNB1,PRC1,SGO1,KNSTRN,SMC2,PTTG1
GO:BP	organelle fission	GO:0048285	1.71359e-15	42	MX1,TDRD9,KIF4A,CENPF,ASPM,TTK,BUB1B,CDK1,CENPE,NDC80,CDC20,CDCA8,UBE2C,KIF2C,ANLN,TOP2A,AURKA,DLGAP5,MKI67,NUSAP1,BUB1,KIF23,NUF2,RACGAP1,MAD2L1,KIF22,KNTC1,KIFC1,NEK2,KIF11,CCNB1,PRC1,CKS2,RAD54L,SGO1,KNSTRN,WNT5A,SMC2,PTTG1,CDC25B,GEN1,EDN1
GO:BP	microtubule-based process	GO:0007017	2.75189e-14	41	GAS2L2,KIF4A,CENPF,ASPM,TTK,BUB1B,SPC24,CDK1,CENPE,NDC80,CDC20,CDCA8,KIF2C,CKAP2,PCLAF,CENPA,AURKA,DLGAP5,KNL1,NUSAP1,BUB1,KIF23,CATSPER4,NUF2,BIRC5,CENPT,KIF20A,RACGAP1,CENPN,MAD2L1,KIF22,UCHL1,KNTC1,KIFC1,NEK2,KIF15,KIF11,SKA3,CCNB1,BRCA1,PRC1
GO:BP	regulation of chromosome segregation	GO:0051983	3.80912e-12	17	CENPF,TTK,BUB1B,CENPE,NDC80,CDC20,UBE2C,KIF2C,DLGAP5,MKI67,BUB1,MAD2L1,KNTC1,CCNB1,PLSCR1,PTTG1,GEN1
GO:BP	kinetochore organization	GO:0051383	7.03236e-12	9	CENPW,CENPF,CENPE,NDC80,CENPA,DLGAP5,NUF2,CENPT,CENPN
GO:BP	regulation of chromosome separation	GO:1905818	3.58321e-11	15	CENPF,TTK,BUB1B,CENPE,NDC80,CDC20,UBE2C,DLGAP5,BUB1,MAD2L1,KNTC1,CCNB1,PLSCR1,PTTG1,GEN1
GO:BP	regulation of mitotic metaphase/anaphase transition	GO:0030071	4.63805e-11	12	CENPF,TTK,BUB1B,CENPE,NDC80,CDC20,UBE2C,DLGAP5,BUB1,MAD2L1,KNTC1,CCNB1
GO:BP	metaphase/anaphase transition of mitotic cell cycle	GO:0007091	6.78088e-11	12	CENPF,TTK,BUB1B,CENPE,NDC80,CDC20,UBE2C,DLGAP5,BUB1,MAD2L1,KNTC1,CCNB1
GO:BP	regulation of metaphase/anaphase transition of cell cycle	GO:1902099	7.97916e-11	12	CENPF,TTK,BUB1B,CENPE,NDC80,CDC20,UBE2C,DLGAP5,BUB1,MAD2L1,KNTC1,CCNB1
GO:BP	regulation of mitotic sister chromatid separation	GO:0010965	9.37129e-11	12	CENPF,TTK,BUB1B,CENPE,NDC80,CDC20,UBE2C,DLGAP5,BUB1,MAD2L1,KNTC1,CCNB1
GO:BP	metaphase/anaphase transition of cell cycle	GO:0044784	1.09851e-10	12	CENPF,TTK,BUB1B,CENPE,NDC80,CDC20,UBE2C,DLGAP5,BUB1,MAD2L1,KNTC1,CCNB1
GO:BP	mitotic sister chromatid separation	GO:0051306	1.28517e-10	12	CENPF,TTK,BUB1B,CENPE,NDC80,CDC20,UBE2C,DLGAP5,BUB1,MAD2L1,KNTC1,CCNB1
GO:BP	chromosome separation	GO:0051304	2.12125e-10	16	CENPF,TTK,BUB1B,CENPE,NDC80,CDC20,UBE2C,TOP2A,DLGAP5,BUB1,MAD2L1,KNTC1,CCNB1,PLSCR1,PTTG1,GEN1
GO:BP	mitotic cell cycle phase transition	GO:0044772	2.17527e-10	29	CYP1A1,CENPF,TTK,BUB1B,CDK1,CENPE,STOX1,NDC80,CDC20,FOXM1,UBE2C,ANLN,HMMR,AURKA,DLGAP5,BUB1,ABCB1,CDKN3,CDKN2C,MAD2L1,RRM2,IQGAP3,KNTC1,NEK2,CCNB1,CLSPN,BRCA1,CCNB3,CKS2
GO:BP	regulation of mitotic nuclear division	GO:0007088	2.72185e-10	14	CENPF,TTK,BUB1B,NDC80,CDC20,AURKA,DLGAP5,MKI67,NUSAP1,BUB1,MAD2L1,KNTC1,NEK2,CCNB1
GO:BP	regulation of sister chromatid segregation	GO:0033045	2.82759e-10	12	CENPF,TTK,BUB1B,CENPE,NDC80,CDC20,UBE2C,DLGAP5,BUB1,MAD2L1,KNTC1,CCNB1
GO:BP	attachment of spindle microtubules to kinetochore	GO:0008608	9.2265e-10	10	CENPE,NDC80,KIF2C,KNL1,NUF2,RACGAP1,NEK2,CCNB1,SGO1,KNSTRN
GO:BP	cell cycle phase transition	GO:0044770	1.20196e-09	29	CYP1A1,CENPF,TTK,BUB1B,CDK1,CENPE,STOX1,NDC80,CDC20,FOXM1,UBE2C,ANLN,HMMR,AURKA,DLGAP5,BUB1,ABCB1,CDKN3,SUSD2,CDKN2C,MAD2L1,RRM2,IQGAP3,KNTC1,NEK2,CCNB1,CLSPN,BRCA1,CCNB3
GO:BP	centromere complex assembly	GO:0034508	1.31154e-09	10	CENPW,CENPF,CENPE,HJURP,CENPA,DLGAP5,KNL1,CENPT,CENPN,MIS18BP1
GO:BP	regulation of cell cycle process	GO:0010564	1.31692e-09	32	CYP1A1,CENPF,TTK,BUB1B,CDK1,CENPE,STOX1,NDC80,CDC20,UBE2C,ANLN,HMMR,AURKA,DLGAP5,MKI67,NUSAP1,BUB1,KIF23,SUSD2,KIF20A,RACGAP1,CDKN2C,MAD2L1,RRM2,KNTC1,NEK2,KIF11,CCNB1,CLSPN,BRCA1,CCNB3,PRC1
GO:BP	regulation of cell cycle	GO:0051726	2.88136e-09	39	CYP1A1,CENPF,ASPM,TTK,BUB1B,CDK1,CENPE,STOX1,NDC80,CDC20,FOXM1,UBE2C,PCLAF,ANLN,HMMR,AURKA,DLGAP5,MKI67,NUSAP1,BUB1,KIF23,CDKN3,BIRC5,SUSD2,KIF20A,RACGAP1,CDKN2C,MAD2L1,RRM2,KNTC1,NEK2,KIF11,CCNB1,CLSPN,BRCA1,CCNB3,PRC1,CKS2,NUPR1
GO:BP	kinetochore assembly	GO:0051382	3.27393e-09	7	CENPW,CENPF,CENPE,CENPA,DLGAP5,CENPT,CENPN
GO:BP	negative regulation of mitotic sister chromatid segregation	GO:0033048	3.29149e-09	11	CENPF,TTK,BUB1B,NDC80,CDC20,BUB1,MAD2L1,KNTC1,CCNB1,PTTG1,GEN1
GO:BP	negative regulation of sister chromatid segregation	GO:0033046	3.29149e-09	11	CENPF,TTK,BUB1B,NDC80,CDC20,BUB1,MAD2L1,KNTC1,CCNB1,PTTG1,GEN1
GO:BP	negative regulation of mitotic sister chromatid separation	GO:2000816	3.29149e-09	11	CENPF,TTK,BUB1B,NDC80,CDC20,BUB1,MAD2L1,KNTC1,CCNB1,PTTG1,GEN1
GO:BP	regulation of nuclear division	GO:0051783	4.53248e-09	14	CENPF,TTK,BUB1B,NDC80,CDC20,AURKA,DLGAP5,MKI67,NUSAP1,BUB1,MAD2L1,KNTC1,NEK2,CCNB1
GO:BP	negative regulation of chromosome segregation	GO:0051985	5.2285e-09	11	CENPF,TTK,BUB1B,NDC80,CDC20,BUB1,MAD2L1,KNTC1,CCNB1,PTTG1,GEN1
GO:BP	negative regulation of chromosome separation	GO:1905819	5.2285e-09	11	CENPF,TTK,BUB1B,NDC80,CDC20,BUB1,MAD2L1,KNTC1,CCNB1,PTTG1,GEN1
GO:BP	regulation of mitotic cell cycle phase transition	GO:1901990	5.2285e-09	23	CYP1A1,CENPF,TTK,BUB1B,CDK1,CENPE,STOX1,NDC80,CDC20,UBE2C,ANLN,HMMR,AURKA,DLGAP5,BUB1,CDKN2C,MAD2L1,KNTC1,NEK2,CCNB1,CLSPN,BRCA1,CCNB3
GO:BP	mitotic spindle assembly checkpoint signaling	GO:0007094	5.46983e-09	9	CENPF,TTK,BUB1B,NDC80,CDC20,BUB1,MAD2L1,KNTC1,CCNB1
GO:BP	mitotic spindle checkpoint signaling	GO:0071174	5.46983e-09	9	CENPF,TTK,BUB1B,NDC80,CDC20,BUB1,MAD2L1,KNTC1,CCNB1
GO:BP	spindle assembly checkpoint signaling	GO:0071173	5.46983e-09	9	CENPF,TTK,BUB1B,NDC80,CDC20,BUB1,MAD2L1,KNTC1,CCNB1
GO:BP	regulation of mitotic sister chromatid segregation	GO:0033047	6.21801e-09	11	CENPF,TTK,BUB1B,NDC80,CDC20,BUB1,MAD2L1,KNTC1,CCNB1,PTTG1,GEN1
GO:BP	spindle checkpoint signaling	GO:0031577	6.76104e-09	9	CENPF,TTK,BUB1B,NDC80,CDC20,BUB1,MAD2L1,KNTC1,CCNB1
GO:BP	type I interferon signaling pathway	GO:0060337	6.92989e-09	10	IFI6,ISG15,MX1,IFIT1,IFIT3,XAF1,IRF7,NLRC5,ZBP1,RSAD2
GO:BP	cellular response to type I interferon	GO:0071357	7.53994e-09	10	IFI6,ISG15,MX1,IFIT1,IFIT3,XAF1,IRF7,NLRC5,ZBP1,RSAD2
GO:BP	negative regulation of mitotic metaphase/anaphase transition	GO:0045841	8.14636e-09	9	CENPF,TTK,BUB1B,NDC80,CDC20,BUB1,MAD2L1,KNTC1,CCNB1
GO:BP	regulation of mitotic cell cycle	GO:0007346	9.59345e-09	27	CYP1A1,CENPF,TTK,BUB1B,CDK1,CENPE,STOX1,NDC80,CDC20,UBE2C,ANLN,HMMR,AURKA,DLGAP5,MKI67,NUSAP1,BUB1,BIRC5,CDKN2C,MAD2L1,KNTC1,NEK2,CCNB1,CLSPN,BRCA1,CCNB3,CKS2
GO:BP	defense response to virus	GO:0051607	1.13665e-08	21	IFI6,ISG15,CXCL10,MX1,IFIT1,IFIT3,IRF7,IFI44L,RTP4,NLRC5,DHX58,ZBP1,RSAD2,EIF2AK2,DDX58,IFIH1,PLSCR1,IFIT2,STAT1,PML,IL15
GO:BP	response to type I interferon	GO:0034340	1.13665e-08	10	IFI6,ISG15,MX1,IFIT1,IFIT3,XAF1,IRF7,NLRC5,ZBP1,RSAD2
GO:BP	defense response to symbiont	GO:0140546	1.13665e-08	21	IFI6,ISG15,CXCL10,MX1,IFIT1,IFIT3,IRF7,IFI44L,RTP4,NLRC5,DHX58,ZBP1,RSAD2,EIF2AK2,DDX58,IFIH1,PLSCR1,IFIT2,STAT1,PML,IL15
GO:BP	negative regulation of metaphase/anaphase transition of cell cycle	GO:1902100	1.1909e-08	9	CENPF,TTK,BUB1B,NDC80,CDC20,BUB1,MAD2L1,KNTC1,CCNB1
GO:BP	protein localization to chromosome, centromeric region	GO:0071459	1.50268e-08	7	TTK,BUB1B,CDK1,NDC80,CENPA,KNL1,CENPT
GO:BP	chromosome organization	GO:0051276	1.61187e-08	40	CENPW,KIF4A,CENPF,TTK,BUB1B,CDK1,CENPE,NDC80,CDC20,CDCA8,UBE2C,HJURP,KIF2C,CENPA,TOP2A,AURKA,DLGAP5,ZNF365,KNL1,MKI67,NUSAP1,BUB1,KIF23,NUF2,PPP5C,CENPT,RACGAP1,CENPN,MAD2L1,MIS18BP1,KIF22,KNTC1,KIFC1,NEK2,CCNB1,BRCA1,PRC1,ZNFX1,RAD54L,MLLT3
GO:BP	regulation of cell cycle phase transition	GO:1901987	2.39295e-08	24	CYP1A1,CENPF,TTK,BUB1B,CDK1,CENPE,STOX1,NDC80,CDC20,UBE2C,ANLN,HMMR,AURKA,DLGAP5,BUB1,SUSD2,CDKN2C,MAD2L1,KNTC1,NEK2,CCNB1,CLSPN,BRCA1,CCNB3
GO:BP	response to virus	GO:0009615	3.77416e-08	26	CYP1A1,IFI6,ISG15,CXCL10,MX1,IFIT1,IFIT3,IRF7,IFI44L,IFI44,RTP4,NLRC5,DHX58,ZBP1,RSAD2,EIF2AK2,DDX58,IFIH1,PLSCR1,IFIT2,STAT1,PML,IL15,PARP9,STMN1,IFIT5
GO:BP	negative regulation of mitotic nuclear division	GO:0045839	3.9224e-08	9	CENPF,TTK,BUB1B,NDC80,CDC20,BUB1,MAD2L1,KNTC1,CCNB1
GO:BP	cytoskeleton organization	GO:0007010	1.02607e-07	40	GAS2L2,KIF4A,CENPF,ASPM,TTK,BUB1B,GHSR,SPC24,CDK1,CENPE,NDC80,CDC20,CDCA8,KIF2C,CKAP2,PCLAF,ANLN,CENPA,AURKA,DLGAP5,KNL1,NUSAP1,BUB1,KIF23,NUF2,BIRC5,CENPT,KIF20A,RACGAP1,CENPN,MAD2L1,IQGAP3,KNTC1,KIFC1,NEK2,KIF11,SKA3,CCNB1,BRCA1,PRC1
GO:BP	negative regulation of chromosome organization	GO:2001251	1.19131e-07	13	CENPF,TTK,BUB1B,NDC80,CDC20,TOP2A,BUB1,MAD2L1,KNTC1,CCNB1,PML,PTTG1,GEN1
GO:BP	negative regulation of nuclear division	GO:0051784	1.58575e-07	9	CENPF,TTK,BUB1B,NDC80,CDC20,BUB1,MAD2L1,KNTC1,CCNB1
GO:BP	mitotic cytokinesis	GO:0000281	1.78413e-07	9	KIF4A,CEP55,CKAP2,ANLN,CENPA,NUSAP1,KIF23,KIF20A,RACGAP1
GO:BP	mitotic cell cycle checkpoint signaling	GO:0007093	2.21812e-07	13	CENPF,TTK,BUB1B,CDK1,NDC80,CDC20,AURKA,BUB1,MAD2L1,KNTC1,CCNB1,CLSPN,BRCA1
GO:BP	establishment of chromosome localization	GO:0051303	3.05739e-07	10	CENPF,CENPE,NDC80,CDCA8,KIF2C,DLGAP5,NUF2,KIF22,KIFC1,CCNB1
GO:BP	chromosome localization	GO:0050000	3.82699e-07	10	CENPF,CENPE,NDC80,CDCA8,KIF2C,DLGAP5,NUF2,KIF22,KIFC1,CCNB1
GO:BP	metaphase plate congression	GO:0051310	5.78192e-07	9	CENPF,CENPE,NDC80,CDCA8,KIF2C,NUF2,KIF22,KIFC1,CCNB1
GO:BP	meiotic nuclear division	GO:0140013	1.04599e-06	16	TDRD9,ASPM,TTK,BUB1B,CDC20,TOP2A,AURKA,BUB1,NUF2,CKS2,RAD54L,SGO1,WNT5A,SMC2,PTTG1,CDC25B
GO:BP	mitotic metaphase plate congression	GO:0007080	1.20301e-06	8	CENPE,NDC80,CDCA8,KIF2C,NUF2,KIF22,KIFC1,CCNB1
GO:BP	positive regulation of response to cytokine stimulus	GO:0060760	1.32788e-06	10	IRF7,NLRC5,ZBP1,PARP14,DDX58,IFIH1,WNT5A,PARP9,EDN1,LAPTM5
GO:BP	CENP-A containing chromatin organization	GO:0061641	1.71977e-06	7	CENPW,HJURP,CENPA,KNL1,CENPT,CENPN,MIS18BP1
GO:BP	CENP-A containing nucleosome assembly	GO:0034080	1.71977e-06	7	CENPW,HJURP,CENPA,KNL1,CENPT,CENPN,MIS18BP1
GO:BP	positive regulation of cell cycle process	GO:0090068	2.11805e-06	18	CYP1A1,CDK1,STOX1,NDC80,UBE2C,AURKA,DLGAP5,NUSAP1,KIF23,RACGAP1,MAD2L1,CCNB1,PLSCR1,WNT5A,RHNO1,CDC25B,GEN1,EDN1
GO:BP	cell cycle checkpoint signaling	GO:0000075	2.58519e-06	13	CENPF,TTK,BUB1B,CDK1,NDC80,CDC20,AURKA,BUB1,MAD2L1,KNTC1,CCNB1,CLSPN,BRCA1
GO:BP	cytoskeleton-dependent cytokinesis	GO:0061640	2.64771e-06	9	KIF4A,CEP55,CKAP2,ANLN,CENPA,NUSAP1,KIF23,KIF20A,RACGAP1
GO:BP	chromatin remodeling at centromere	GO:0031055	2.66098e-06	7	CENPW,HJURP,CENPA,KNL1,CENPT,CENPN,MIS18BP1
GO:BP	meiotic cell cycle process	GO:1903046	3.01375e-06	16	TDRD9,ASPM,TTK,BUB1B,CDC20,TOP2A,AURKA,BUB1,NUF2,CKS2,RAD54L,SGO1,WNT5A,SMC2,PTTG1,CDC25B
GO:BP	regulation of exit from mitosis	GO:0007096	3.22209e-06	7	BUB1B,CDC20,UBE2C,ANLN,MAD2L1,KNTC1,NEK2
GO:BP	meiotic cell cycle	GO:0051321	3.69374e-06	18	TDRD9,ASPM,TTK,BUB1B,CDC20,TOP2A,AURKA,BUB1,NUF2,NEK2,CCNB3,CKS2,RAD54L,SGO1,WNT5A,SMC2,PTTG1,CDC25B
GO:BP	protein localization to kinetochore	GO:0034501	6.74839e-06	5	TTK,CDK1,NDC80,KNL1,CENPT
GO:BP	protein localization to condensed chromosome	GO:1903083	6.74839e-06	5	TTK,CDK1,NDC80,KNL1,CENPT
GO:BP	DNA replication-independent nucleosome assembly	GO:0006336	6.81881e-06	7	CENPW,HJURP,CENPA,KNL1,CENPT,CENPN,MIS18BP1
GO:BP	positive regulation of cell cycle	GO:0045787	6.95059e-06	20	CYP1A1,CDK1,STOX1,NDC80,UBE2C,AURKA,DLGAP5,NUSAP1,KIF23,RACGAP1,MAD2L1,CCNB1,CKS2,NUPR1,PLSCR1,WNT5A,RHNO1,CDC25B,GEN1,EDN1
GO:BP	DNA replication-independent nucleosome organization	GO:0034724	7.60573e-06	7	CENPW,HJURP,CENPA,KNL1,CENPT,CENPN,MIS18BP1
GO:BP	regulation of chromosome organization	GO:0033044	8.04403e-06	15	CENPF,TTK,BUB1B,CENPE,NDC80,CDC20,UBE2C,TOP2A,DLGAP5,BUB1,MAD2L1,KNTC1,NEK2,CCNB1,BRCA1
GO:BP	negative regulation of mitotic cell cycle phase transition	GO:1901991	8.92447e-06	14	CENPF,TTK,BUB1B,CDK1,NDC80,CDC20,AURKA,BUB1,CDKN2C,MAD2L1,KNTC1,CCNB1,CLSPN,BRCA1
GO:BP	spindle assembly	GO:0051225	9.08079e-06	10	KIF4A,ASPM,CDC20,AURKA,KIF23,RACGAP1,KIFC1,NEK2,KIF11,PRC1
GO:BP	antiviral innate immune response	GO:0140374	9.28475e-06	3	CXCL10,MX1,IFIT1
GO:BP	negative regulation of cell cycle process	GO:0010948	1.18193e-05	17	CENPF,TTK,BUB1B,CDK1,NDC80,CDC20,AURKA,BUB1,SUSD2,CDKN2C,MAD2L1,RRM2,KNTC1,NEK2,CCNB1,CLSPN,BRCA1
GO:BP	mitotic spindle assembly	GO:0090307	1.2016e-05	8	KIF4A,CDC20,KIF23,RACGAP1,KIFC1,NEK2,KIF11,PRC1
GO:BP	exit from mitosis	GO:0010458	1.46689e-05	7	BUB1B,CDC20,UBE2C,ANLN,MAD2L1,KNTC1,NEK2
GO:BP	cytokinesis	GO:0000910	2.18493e-05	10	KIF4A,CEP55,CKAP2,ANLN,CENPA,AURKA,NUSAP1,KIF23,KIF20A,RACGAP1
GO:BP	negative regulation of cell cycle phase transition	GO:1901988	2.51027e-05	15	CENPF,TTK,BUB1B,CDK1,NDC80,CDC20,AURKA,BUB1,SUSD2,CDKN2C,MAD2L1,KNTC1,CCNB1,CLSPN,BRCA1
GO:BP	negative regulation of viral process	GO:0048525	2.73234e-05	11	ISG15,MX1,IFIT1,RSAD2,CIITA,EIF2AK2,PLSCR1,STAT1,PML,TRIM59,IFIT5
GO:BP	mitotic spindle midzone assembly	GO:0051256	2.89286e-05	4	KIF4A,KIF23,RACGAP1,PRC1
GO:BP	biological process involved in interspecies interaction between organisms	GO:0044419	3.41674e-05	26	CYP1A1,IFI6,ISG15,CXCL10,MX1,ABCC8,IFIT1,THRSP,IFIT3,XAF1,IRF7,GHSR,CAMK2B,CDK1,CFB,IFI44L,GBP6,IFI44,RTP4,BANK1,RNF213,NLRC5,FN1,DHX58,ZBP1,RSAD2
GO:BP	histone exchange	GO:0043486	4.47363e-05	7	CENPW,HJURP,CENPA,KNL1,CENPT,CENPN,MIS18BP1
GO:BP	mitotic spindle elongation	GO:0000022	4.94311e-05	4	KIF4A,KIF23,RACGAP1,PRC1
GO:BP	spindle elongation	GO:0051231	4.94311e-05	4	KIF4A,KIF23,RACGAP1,PRC1
GO:BP	retrograde vesicle-mediated transport, Golgi to endoplasmic reticulum	GO:0006890	4.94311e-05	8	KIF4A,CENPE,KIF2C,KIF23,RACGAP1,KIF22,KIF15,KIF11
GO:BP	positive regulation of cytokine-mediated signaling pathway	GO:0001961	5.28631e-05	8	IRF7,NLRC5,ZBP1,PARP14,WNT5A,PARP9,EDN1,LAPTM5
GO:BP	attachment of mitotic spindle microtubules to kinetochore	GO:0051315	7.77e-05	4	CENPE,NDC80,KIF2C,NUF2
GO:BP	negative regulation of macrophage apoptotic process	GO:2000110	7.88085e-05	3	IRF7,GHSR,NOD2
GO:BP	negative regulation of mitotic cell cycle	GO:0045930	8.32051e-05	14	CENPF,TTK,BUB1B,CDK1,NDC80,CDC20,AURKA,BUB1,CDKN2C,MAD2L1,KNTC1,CCNB1,CLSPN,BRCA1
GO:BP	antigen processing and presentation of exogenous peptide antigen via MHC class II	GO:0019886	0.00010817	8	KIF4A,CENPE,KIF2C,KIF23,RACGAP1,KIF22,KIF15,KIF11
GO:BP	protein localization to chromosome	GO:0034502	0.000117019	7	TTK,BUB1B,CDK1,NDC80,CENPA,KNL1,CENPT
GO:BP	antigen processing and presentation of peptide antigen via MHC class II	GO:0002495	0.000144127	8	KIF4A,CENPE,KIF2C,KIF23,RACGAP1,KIF22,KIF15,KIF11
GO:BP	negative regulation of cell cycle	GO:0045786	0.000146779	17	CENPF,TTK,BUB1B,CDK1,NDC80,CDC20,AURKA,BUB1,SUSD2,CDKN2C,MAD2L1,RRM2,KNTC1,NEK2,CCNB1,CLSPN,BRCA1
GO:BP	spindle midzone assembly	GO:0051255	0.000173466	4	KIF4A,KIF23,RACGAP1,PRC1
GO:BP	antigen processing and presentation of peptide or polysaccharide antigen via MHC class II	GO:0002504	0.000174822	8	KIF4A,CENPE,KIF2C,KIF23,RACGAP1,KIF22,KIF15,KIF11
GO:BP	extracellular matrix organization	GO:0030198	0.000189745	21	FMOD,COL28A1,ACAN,MELTF,VIT,FN1,COL4A6,OLFML2B,ADAMTS6,NOXO1,SFRP2,KAZALD1,ITGB4,TLL1,NPNT,MMP28,ADAMTSL2,COL21A1,COL18A1,ABI3BP,AGRN
GO:BP	extracellular structure organization	GO:0043062	0.000195157	21	FMOD,COL28A1,ACAN,MELTF,VIT,FN1,COL4A6,OLFML2B,ADAMTS6,NOXO1,SFRP2,KAZALD1,ITGB4,TLL1,NPNT,MMP28,ADAMTSL2,COL21A1,COL18A1,ABI3BP,AGRN
GO:BP	negative regulation of organelle organization	GO:0010639	0.000199047	19	GAS2L2,CENPF,TTK,BUB1B,NDC80,CDC20,CKAP2,TOP2A,BUB1,MAD2L1,KNTC1,CCNB1,BRCA1,NUPR1,PML,PTTG1,CAPG,GEN1,STMN1
GO:BP	external encapsulating structure organization	GO:0045229	0.000206418	21	FMOD,COL28A1,ACAN,MELTF,VIT,FN1,COL4A6,OLFML2B,ADAMTS6,NOXO1,SFRP2,KAZALD1,ITGB4,TLL1,NPNT,MMP28,ADAMTSL2,COL21A1,COL18A1,ABI3BP,AGRN
GO:BP	response to other organism	GO:0051707	0.000221392	23	CYP1A1,IFI6,ISG15,CXCL10,MX1,ABCC8,IFIT1,THRSP,IFIT3,XAF1,IRF7,GHSR,CAMK2B,CFB,IFI44L,GBP6,IFI44,RTP4,BANK1,NLRC5,DHX58,ZBP1,RSAD2
GO:BP	ghrelin secretion	GO:0036321	0.000221713	2	FFAR4,GHSR
GO:BP	response to external biotic stimulus	GO:0043207	0.000221713	23	CYP1A1,IFI6,ISG15,CXCL10,MX1,ABCC8,IFIT1,THRSP,IFIT3,XAF1,IRF7,GHSR,CAMK2B,CFB,IFI44L,GBP6,IFI44,RTP4,BANK1,NLRC5,DHX58,ZBP1,RSAD2
GO:BP	alpha-amino acid metabolic process	GO:1901605	0.000247857	3	GLYAT,ASPG,IDO1
GO:BP	DNA packaging	GO:0006323	0.000290067	12	CENPW,CDK1,HJURP,CENPA,TOP2A,KNL1,NUSAP1,CENPT,CENPN,MIS18BP1,CCNB1,ZNFX1
GO:BP	G2/M transition of mitotic cell cycle	GO:0000086	0.000290067	12	CENPF,CDK1,STOX1,FOXM1,HMMR,AURKA,ABCB1,NEK2,CCNB1,CLSPN,BRCA1,CCNB3
GO:BP	negative regulation of type I interferon production	GO:0032480	0.000293717	6	ISG15,NLRC5,DHX58,UBE2L6,DDX58,IFIH1
GO:BP	response to biotic stimulus	GO:0009607	0.000311568	23	CYP1A1,IFI6,ISG15,CXCL10,MX1,ABCC8,IFIT1,THRSP,IFIT3,XAF1,IRF7,GHSR,CAMK2B,CFB,IFI44L,GBP6,IFI44,RTP4,BANK1,NLRC5,DHX58,ZBP1,RSAD2
GO:BP	microtubule-based movement	GO:0007018	0.000336799	14	GAS2L2,KIF4A,CENPE,KIF2C,DLGAP5,KIF23,CATSPER4,KIF20A,RACGAP1,KIF22,UCHL1,KIFC1,KIF15,KIF11
GO:BP	ATP-dependent chromatin remodeling	GO:0043044	0.000401297	7	CENPW,HJURP,CENPA,KNL1,CENPT,CENPN,MIS18BP1
GO:BP	regulation of cellular component organization	GO:0051128	0.000401297	48	CXCL10,GAS2L2,ABCC8,CENPF,TTK,BUB1B,GHSR,CAMK2B,CENPE,STOX1,NDC80,CDC20,FOXM1,UBE2C,HJURP,CKAP2,ANLN,TOP2A,AURKA,MELTF,DLGAP5,ZNF365,MKI67,FN1,NUSAP1,GPBAR1,TNFSF10,BUB1,ROBO2,CDKN2C,MAD2L1,IQGAP3,KNTC1,SFRP2,NEK2,KAZALD1,EIF2AK2,PRRX1,SORL1,SKA3,CNTN1,CCNB1,BRCA1,BMF,MDK,MLLT3,NUPR1,TPPP2
GO:BP	carboxylic acid metabolic process	GO:0019752	0.000412696	4	CYP1A1,GLYAT,ASPG,IDO1
GO:BP	cell cycle G2/M phase transition	GO:0044839	0.000414696	12	CENPF,CDK1,STOX1,FOXM1,HMMR,AURKA,ABCB1,NEK2,CCNB1,CLSPN,BRCA1,CCNB3
GO:BP	establishment of organelle localization	GO:0051656	0.00043201	14	MX1,CENPF,CENPE,NDC80,CDCA8,KIF2C,CENPA,DLGAP5,NUSAP1,NUF2,MAD2L1,KIF22,UCHL1,KIFC1
GO:BP	negative regulation of viral genome replication	GO:0045071	0.000450476	3	ISG15,MX1,IFIT1
GO:BP	oxoacid metabolic process	GO:0043436	0.000453912	4	CYP1A1,GLYAT,ASPG,IDO1
GO:BP	organic acid metabolic process	GO:0006082	0.000507161	4	CYP1A1,GLYAT,ASPG,IDO1
GO:BP	regulation of attachment of spindle microtubules to kinetochore	GO:0051988	0.000553302	4	RACGAP1,NEK2,CCNB1,KNSTRN
GO:BP	regulation of cell division	GO:0051302	0.000553302	10	ASPM,AURKA,KIF23,SUSD2,KIF20A,RACGAP1,SFRP2,PRC1,MDK,MLLT3
GO:BP	anaphase-promoting complex-dependent catabolic process	GO:0031145	0.000579095	7	BUB1B,CDK1,CDC20,UBE2C,AURKA,MAD2L1,CCNB1
GO:BP	positive regulation of type I interferon-mediated signaling pathway	GO:0060340	0.000606645	4	IRF7,NLRC5,ZBP1,WNT5A
GO:BP	cytokine-mediated signaling pathway	GO:0019221	0.000763513	15	IFI6,ISG15,CXCL10,MX1,IFIT1,IFIT3,XAF1,IRF7,CAMK2B,ACKR4,NLRC5,FN1,TNFRSF19,ZBP1,RSAD2
GO:BP	regulation of macrophage apoptotic process	GO:2000109	0.000815256	3	IRF7,GHSR,NOD2
GO:BP	regulation of G2/M transition of mitotic cell cycle	GO:0010389	0.000837788	10	CENPF,CDK1,STOX1,HMMR,AURKA,NEK2,CCNB1,CLSPN,BRCA1,CCNB3
GO:BP	cellular amino acid metabolic process	GO:0006520	0.000954264	3	GLYAT,ASPG,IDO1
GO:BP	meiotic chromosome segregation	GO:0045132	0.00116458	8	TTK,BUB1B,TOP2A,BUB1,NUF2,SGO1,SMC2,PTTG1
GO:BP	regulation of cell cycle G2/M phase transition	GO:1902749	0.00118645	10	CENPF,CDK1,STOX1,HMMR,AURKA,NEK2,CCNB1,CLSPN,BRCA1,CCNB3
GO:BP	organelle localization	GO:0051640	0.00120569	17	MX1,CENPF,ASPM,CDK1,CENPE,NDC80,CDCA8,KIF2C,CENPA,DLGAP5,NUSAP1,NUF2,MAD2L1,KIF22,UCHL1,KIFC1,NEK2
GO:BP	collagen fibril organization	GO:0030199	0.00120569	9	FMOD,COL28A1,ACAN,COL4A6,SFRP2,ITGB4,TLL1,COL21A1,COL18A1
GO:BP	centrosome cycle	GO:0007098	0.00121543	11	CDK1,NDC80,PCLAF,AURKA,NEK2,KIF11,BRCA1,SGO1,GEN1,BRCA2,GADD45A
GO:BP	cellular response to exogenous dsRNA	GO:0071360	0.00126338	4	IFIT1,CIITA,DDX58,IFIH1
GO:BP	positive regulation of mitotic cell cycle phase transition	GO:1901992	0.0013685	5	CYP1A1,CDK1,STOX1,UBE2C,DLGAP5
GO:BP	xenobiotic metabolic process	GO:0006805	0.00137175	2	CYP1A1,GLYAT
GO:BP	regulation of viral genome replication	GO:0045069	0.00140841	3	ISG15,MX1,IFIT1
GO:BP	regulation of type I interferon-mediated signaling pathway	GO:0060338	0.00142528	4	ISG15,IRF7,NLRC5,ZBP1
GO:BP	defense response	GO:0006952	0.00144366	24	IFI6,ISG15,CXCL10,MX1,IFIT1,FFAR4,FCGR3A,IFIT3,XAF1,IRF7,C3AR1,GHSR,CAMK2B,CFB,CCN4,IFI44L,GBP6,RTP4,NLRC5,FN1,DHX58,ZBP1,GPBAR1,RSAD2
GO:BP	cellular response to xenobiotic stimulus	GO:0071466	0.00145405	2	CYP1A1,GLYAT
GO:BP	macrophage apoptotic process	GO:0071888	0.00155953	3	IRF7,GHSR,NOD2
GO:BP	response to xenobiotic stimulus	GO:0009410	0.0016322	2	CYP1A1,GLYAT
GO:BP	regulation of viral life cycle	GO:1903900	0.00164457	11	ISG15,MX1,IFIT1,TOP2A,RSAD2,CIITA,EIF2AK2,PLSCR1,PML,TRIM59,IFIT5
GO:BP	ethylene metabolic process	GO:0009692	0.00175733	1	CYP1A1
GO:BP	dibenzo-p-dioxin catabolic process	GO:0019341	0.00175733	1	CYP1A1
GO:BP	spindle localization	GO:0051653	0.00179192	5	ASPM,NDC80,CENPA,NUSAP1,MAD2L1
GO:BP	regulation of cytokine production	GO:0001817	0.00184018	22	ISG15,ABCC8,FFAR4,IRF7,C3AR1,GHSR,CCN4,BANK1,NLRC5,FN1,DHX58,ZBP1,RSAD2,NOD2,TMEM106A,UBE2L6,EIF2AK2,SORL1,BRCA1,DDX58,MDK,IFIH1
GO:BP	type I interferon production	GO:0032606	0.00184018	9	ISG15,IRF7,NLRC5,DHX58,ZBP1,UBE2L6,DDX58,IFIH1,STAT1
GO:BP	interferon-gamma-mediated signaling pathway	GO:0060333	0.00184018	8	IRF7,CAMK2B,NLRC5,PARP14,CIITA,STAT1,PML,PARP9
GO:BP	regulation of type I interferon production	GO:0032479	0.00184018	9	ISG15,IRF7,NLRC5,DHX58,ZBP1,UBE2L6,DDX58,IFIH1,STAT1
GO:BP	regulation of mitotic spindle checkpoint	GO:1903504	0.00196221	4	NDC80,MAD2L1,CCNB1,GEN1
GO:BP	regulation of spindle checkpoint	GO:0090231	0.00196221	4	NDC80,MAD2L1,CCNB1,GEN1
GO:BP	regulation of mitotic cell cycle spindle assembly checkpoint	GO:0090266	0.00196221	4	NDC80,MAD2L1,CCNB1,GEN1
GO:BP	negative regulation of myeloid cell apoptotic process	GO:0033033	0.00196657	3	IRF7,GHSR,NOD2
GO:BP	cytokine production	GO:0001816	0.00201492	22	ISG15,ABCC8,FFAR4,IRF7,C3AR1,GHSR,CCN4,BANK1,NLRC5,FN1,DHX58,ZBP1,RSAD2,NOD2,TMEM106A,UBE2L6,EIF2AK2,SORL1,BRCA1,DDX58,MDK,IFIH1
GO:BP	microtubule organizing center organization	GO:0031023	0.00221047	11	CDK1,NDC80,PCLAF,AURKA,NEK2,KIF11,BRCA1,SGO1,GEN1,BRCA2,GADD45A
GO:BP	protein-DNA complex assembly	GO:0065004	0.00221047	10	CENPW,CENPF,CENPE,HJURP,CENPA,DLGAP5,KNL1,CENPT,CENPN,MIS18BP1
GO:BP	DNA conformation change	GO:0071103	0.00222381	13	CENPW,CDK1,HJURP,CENPA,TOP2A,KNL1,NUSAP1,CENPT,CENPN,MIS18BP1,CCNB1,ZNFX1,RAD54L
GO:BP	cellular response to dsRNA	GO:0071359	0.0023888	4	IFIT1,CIITA,DDX58,IFIH1
GO:BP	nucleosome assembly	GO:0006334	0.00248649	7	CENPW,HJURP,CENPA,KNL1,CENPT,CENPN,MIS18BP1
GO:BP	regulation of response to cytokine stimulus	GO:0060759	0.00259281	12	ISG15,IRF7,NLRC5,ZBP1,PARP14,DDX58,IFIH1,WNT5A,STAT1,PARP9,EDN1,LAPTM5
GO:BP	regulation of viral process	GO:0050792	0.00259281	12	ISG15,MX1,IFIT1,TOP2A,RSAD2,CIITA,EIF2AK2,PLSCR1,STAT1,PML,TRIM59,IFIT5
GO:BP	centrosome localization	GO:0051642	0.00259281	4	ASPM,AURKA,DLGAP5,MAD2L1
GO:BP	meiotic sister chromatid segregation	GO:0045144	0.00281036	3	BUB1B,BUB1,SGO1
GO:BP	meiosis II cell cycle process	GO:0061983	0.00281036	3	BUB1B,BUB1,SGO1
GO:BP	meiosis II	GO:0007135	0.00281036	3	BUB1B,BUB1,SGO1
GO:BP	regulation of defense response to virus	GO:0050688	0.00281036	7	IFIT1,DHX58,DDX58,STAT1,PML,IL15,PARP9
GO:BP	microtubule organizing center localization	GO:0061842	0.00281036	4	ASPM,AURKA,DLGAP5,MAD2L1
GO:BP	cellular response to interferon-gamma	GO:0071346	0.00281036	11	IRF7,CAMK2B,GBP6,NLRC5,PARP14,CIITA,WNT5A,STAT1,PML,PARP9,EDN1
GO:BP	meiotic sister chromatid cohesion	GO:0051177	0.00281036	3	BUB1B,BUB1,SGO1
GO:BP	mitotic chromosome movement towards spindle pole	GO:0007079	0.00289194	2	CENPE,DLGAP5
GO:BP	antigen processing and presentation of exogenous peptide antigen	GO:0002478	0.00289194	9	KIF4A,CENPE,KIF2C,KIF23,RACGAP1,KIF22,KIF15,KIF11,NCF4
GO:BP	olefin metabolic process	GO:1900673	0.00293818	1	CYP1A1
GO:BP	benzoyl-CoA metabolic process	GO:1901787	0.00293818	1	GLYAT
GO:BP	insecticide metabolic process	GO:0017143	0.00293818	1	CYP1A1
GO:BP	cellular alkene metabolic process	GO:0043449	0.00293818	1	CYP1A1
GO:BP	positive regulation of signal transduction	GO:0009967	0.00303572	30	GAS2L2,FFAR4,ASPM,IRF7,TTK,GHSR,STOX1,NDC80,CCN4,BANK1,NLRC5,FN1,TNFRSF19,DHX58,ZBP1,GPBAR1,RSAD2,TNFSF10,PPP5C,ROBO2,MAD2L1,NOD2,IQGAP3,TMEM106A,SFRP2,F2RL2,PARP14,EIF2AK2,PRRX1,SORL1
GO:BP	positive regulation of spindle checkpoint	GO:0090232	0.00312938	3	NDC80,MAD2L1,GEN1
GO:BP	positive regulation of mitotic cell cycle spindle assembly checkpoint	GO:0090267	0.00312938	3	NDC80,MAD2L1,GEN1
GO:BP	positive regulation of cell cycle phase transition	GO:1901989	0.00323841	5	CYP1A1,CDK1,STOX1,UBE2C,DLGAP5
GO:BP	small molecule metabolic process	GO:0044281	0.0032857	4	CYP1A1,GLYAT,ASPG,IDO1
GO:BP	establishment of mitotic spindle localization	GO:0040001	0.0033127	4	NDC80,CENPA,NUSAP1,MAD2L1
GO:BP	cytokinetic process	GO:0032506	0.00362406	4	CEP55,ANLN,KIF20A,RACGAP1
GO:BP	positive regulation of mitotic cell cycle	GO:0045931	0.00373169	5	CYP1A1,CDK1,STOX1,UBE2C,DLGAP5
GO:BP	antigen processing and presentation of exogenous antigen	GO:0019884	0.00377827	9	KIF4A,CENPE,KIF2C,KIF23,RACGAP1,KIF22,KIF15,KIF11,NCF4
GO:BP	cellular response to virus	GO:0098586	0.00379439	6	IFI6,CXCL10,IRF7,DHX58,DDX58,IFIH1
GO:BP	negative regulation of peptide hormone secretion	GO:0090278	0.00386135	3	ABCC8,FFAR4,GHSR
GO:BP	viral genome replication	GO:0019079	0.00390666	3	ISG15,MX1,IFIT1
GO:BP	response to exogenous dsRNA	GO:0043330	0.00390666	5	IFIT1,NOD2,CIITA,DDX58,IFIH1
GO:BP	glycosaminoglycan catabolic process	GO:0006027	0.00390666	7	FMOD,ACAN,HMMR,AGRN,SGSH,HYAL1,HEXB
GO:BP	MDA-5 signaling pathway	GO:0039530	0.00392913	3	IRF7,DHX58,IFIH1
GO:BP	reproductive process	GO:0022414	0.00392913	50	CYP1A1,IDO1,ABCC8,TDRD9,ASPM,TTK,BUB1B,GHSR,CDK1,CDC20,TOP2A,AURKA,KNL1,TNFSF10,BUB1,CATSPER4,NUF2,ROBO2,RACGAP1,KIFC1,SFRP2,NEK2,ZMYND15,CCNB1,CCNB3,ITGB4,CKS2,RAD54L,MDK,NUPR1,TPPP2,SGO1,CFAP54,WNT5A,SMC2,PTTG1,CFAP69,CDC25B,VDR,EDN1,BRCA2,UCP2,SMARCA2,TNFAIP6,RAB13,BBS2,HEXB,SPATA24,ACVR1,HMGB2
GO:BP	defense response to other organism	GO:0098542	0.00392913	17	IFI6,ISG15,CXCL10,MX1,IFIT1,IFIT3,XAF1,IRF7,CAMK2B,CFB,IFI44L,GBP6,RTP4,NLRC5,DHX58,ZBP1,RSAD2
GO:BP	response to nematode	GO:0009624	0.00392913	1	CYP1A1
GO:BP	9-cis-retinoic acid biosynthetic process	GO:0042904	0.00392913	1	CYP1A1
GO:BP	positive regulation of cytokine production	GO:0001819	0.00392913	18	ISG15,ABCC8,IRF7,C3AR1,DHX58,ZBP1,RSAD2,NOD2,TMEM106A,EIF2AK2,SORL1,BRCA1,DDX58,MDK,IFIH1,WNT5A,STAT1,IL15
GO:BP	dibenzo-p-dioxin metabolic process	GO:0018894	0.00392913	1	CYP1A1
GO:BP	negative regulation of peptide secretion	GO:0002792	0.00392913	3	ABCC8,FFAR4,GHSR
GO:BP	9-cis-retinoic acid metabolic process	GO:0042905	0.00392913	1	CYP1A1
GO:BP	negative regulation of cellular component organization	GO:0051129	0.00395316	26	CXCL10,GAS2L2,CENPF,TTK,BUB1B,NDC80,CDC20,CKAP2,TOP2A,ZNF365,BUB1,ROBO2,MAD2L1,KNTC1,SORL1,CCNB1,BRCA1,NUPR1,SEMA3G,WNT5A,PML,PTTG1,CAPG,SEMA6C,GEN1,STMN1
GO:BP	reproduction	GO:0000003	0.0040328	50	CYP1A1,IDO1,ABCC8,TDRD9,ASPM,TTK,BUB1B,GHSR,CDK1,CDC20,TOP2A,AURKA,KNL1,TNFSF10,BUB1,CATSPER4,NUF2,ROBO2,RACGAP1,KIFC1,SFRP2,NEK2,ZMYND15,CCNB1,CCNB3,ITGB4,CKS2,RAD54L,MDK,NUPR1,TPPP2,SGO1,CFAP54,WNT5A,SMC2,PTTG1,CFAP69,CDC25B,VDR,EDN1,BRCA2,UCP2,SMARCA2,TNFAIP6,RAB13,BBS2,HEXB,SPATA24,ACVR1,HMGB2
GO:BP	response to toxic substance	GO:0009636	0.00405036	14	CYP1A1,GLYAT,GSTA1,SLC22A18,CDK1,ABCB1,CCNB1,NUPR1,EPHX1,MGMT,ABCG2,MGST2,SESN1,PRXL2B
GO:BP	meiotic sister chromatid cohesion, centromeric	GO:0051754	0.00409976	2	BUB1B,BUB1
GO:BP	female meiotic nuclear division	GO:0007143	0.00425303	3	TTK,TOP2A,AURKA
GO:BP	regulation of organelle organization	GO:0033043	0.00430848	27	GAS2L2,CENPF,TTK,BUB1B,CENPE,STOX1,NDC80,CDC20,UBE2C,CKAP2,TOP2A,AURKA,DLGAP5,MKI67,NUSAP1,TNFSF10,BUB1,MAD2L1,IQGAP3,KNTC1,NEK2,SKA3,CCNB1,BRCA1,BMF,MDK,NUPR1
GO:BP	innate immune response	GO:0045087	0.00441724	15	IFI6,ISG15,CXCL10,MX1,IFIT1,IFIT3,XAF1,IRF7,CAMK2B,CFB,GBP6,NLRC5,DHX58,ZBP1,RSAD2
GO:BP	centromeric sister chromatid cohesion	GO:0070601	0.00447691	3	BUB1B,BUB1,SGO1
GO:BP	cellular process involved in reproduction in multicellular organism	GO:0022412	0.00452061	19	TDRD9,ASPM,TTK,TOP2A,AURKA,KNL1,CATSPER4,ROBO2,ZMYND15,CCNB1,MDK,CFAP69,CDC25B,BRCA2,SMARCA2,BBS2,HEXB,ACVR1,HMGB2
GO:BP	organelle assembly	GO:0070925	0.0047128	21	CENPW,KIF4A,CENPF,ASPM,CDK1,CENPE,CDC20,ANLN,CENPA,AURKA,DLGAP5,KNL1,KIF23,CENPT,RACGAP1,CENPN,KIFC1,NEK2,KIF11,BRCA1,PRC1
GO:BP	antigen processing and presentation	GO:0019882	0.00489872	10	KIF4A,CENPE,KIF2C,KIF23,RACGAP1,NOD2,KIF22,KIF15,KIF11,NCF4
GO:BP	antigen processing and presentation of peptide antigen	GO:0048002	0.00497701	9	KIF4A,CENPE,KIF2C,KIF23,RACGAP1,KIF22,KIF15,KIF11,NCF4
GO:BP	response to cytokine	GO:0034097	0.00502164	38	IFI6,ISG15,CXCL10,MX1,IFIT1,IFIT3,XAF1,IRF7,CAMK2B,GBP6,ACKR4,NLRC5,FN1,TNFRSF19,ZBP1,RSAD2,BIRC5,NOD2,PARP14,CIITA,EIF2AK2,BRCA1,DDX58,IFIH1,NPNT,PLSCR1,WNT5A,IFIT2,STAT1,PML,IL15,PARP9,PLVAP,EDN1,LAPTM5,CSF2RB,IFIT5,IRS1
GO:BP	mitotic centrosome separation	GO:0007100	0.00509572	3	AURKA,NEK2,KIF11
GO:BP	positive regulation of interferon-alpha production	GO:0032727	0.00512327	4	IRF7,DDX58,IFIH1,STAT1
GO:BP	regulation of chemotaxis	GO:0050920	0.00514861	12	CXCL10,C3AR1,ROBO2,NOD2,MDK,PLA2G7,MMP28,SEMA3G,WNT5A,SEMA6C,PLXNA4,EDN1
GO:BP	protein-DNA complex subunit organization	GO:0071824	0.00525041	10	CENPW,CENPF,CENPE,HJURP,CENPA,DLGAP5,KNL1,CENPT,CENPN,MIS18BP1
GO:BP	cellular component organization	GO:0016043	0.00544921	95	IFI6,CXCL10,GAS2L2,MX1,ABCC8,TDRD9,CENPW,FMOD,KIF4A,CENPF,ASPM,TTK,BUB1B,GHSR,COL28A1,CAMK2B,SPC24,CDK1,CENPE,STOX1,NDC80,ACAN,CDC20,CEP55,FOXM1,CDCA8,UBE2C,HJURP,KIF2C,CKAP2,PCLAF,ANLN,CENPA,TOP2A,AURKA,MELTF,DLGAP5,RTP4,RNF213,ZNF365,KNL1,VIT,MKI67,FN1,NUSAP1,GPBAR1,COL4A6,TNFSF10,BUB1,KIF23,ABCB1,NUF2,PPP5C,BIRC5,CENPT,OLFML2B,ADAMTS6,ROBO2,KIF20A,RACGAP1,CDKN2C,CENPN,MAD2L1,MIS18BP1,NOXO1,RRM…
GO:BP	cellular response to cytokine stimulus	GO:0071345	0.00558661	16	IFI6,ISG15,CXCL10,MX1,IFIT1,IFIT3,XAF1,IRF7,CAMK2B,GBP6,ACKR4,NLRC5,FN1,TNFRSF19,ZBP1,RSAD2
GO:BP	response to interferon-gamma	GO:0034341	0.00577594	11	IRF7,CAMK2B,GBP6,NLRC5,PARP14,CIITA,WNT5A,STAT1,PML,PARP9,EDN1
GO:BP	response to dsRNA	GO:0043331	0.00582517	5	IFIT1,NOD2,CIITA,DDX58,IFIH1
GO:BP	response to iron(III) ion	GO:0010041	0.00593287	1	CYP1A1
GO:BP	aminoglycan catabolic process	GO:0006026	0.00606028	7	FMOD,ACAN,HMMR,AGRN,SGSH,HYAL1,HEXB
GO:BP	centrosome separation	GO:0051299	0.00606028	3	AURKA,NEK2,KIF11
GO:BP	regulation of non-canonical Wnt signaling pathway	GO:2000050	0.00644092	4	RNF213,SFRP2,MLLT3,WNT5A
GO:BP	immune system process	GO:0002376	0.00663027	33	IDO1,IFI6,ISG15,CXCL10,MX1,IFIT1,FCGR3A,KIF4A,IFIT3,XAF1,IRF7,C3AR1,CAMK2B,CENPE,CFB,CCN4,IFI44L,KIF2C,LMO1,GBP6,ACKR4,TOP2A,IFI44,RTP4,BANK1,NLRC5,FN1,DHX58,ZBP1,GPBAR1,RSAD2,LRRC17,TNFSF10
GO:BP	positive regulation of synapse maturation	GO:0090129	0.00676138	2	CAMK2B,CDC20
GO:BP	positive regulation of cell communication	GO:0010647	0.00681766	31	GAS2L2,FFAR4,ASPM,IRF7,TTK,GHSR,STOX1,NDC80,CCN4,BANK1,NLRC5,FN1,TNFRSF19,DHX58,ZBP1,GPBAR1,RSAD2,TNFSF10,PPP5C,ROBO2,MAD2L1,NOD2,IQGAP3,TMEM106A,RASL10B,SFRP2,F2RL2,PARP14,EIF2AK2,PRRX1,SORL1
GO:BP	hydrocarbon metabolic process	GO:0120252	0.00688409	1	CYP1A1
GO:BP	maternal process involved in parturition	GO:0060137	0.00688409	1	CYP1A1
GO:BP	meiosis I	GO:0007127	0.00692496	9	TDRD9,TOP2A,AURKA,CKS2,RAD54L,SGO1,PTTG1,CDC25B,BRCA2
GO:BP	positive regulation of response to stimulus	GO:0048584	0.00699	42	CXCL10,GAS2L2,FFAR4,FCGR3A,ASPM,IRF7,C3AR1,TTK,GHSR,STOX1,NDC80,CFB,CCN4,FOXM1,BANK1,NLRC5,FN1,TNFRSF19,DHX58,ZBP1,GPBAR1,RSAD2,TNFSF10,PPP5C,ROBO2,MAD2L1,NOD2,IQGAP3,TMEM106A,SFRP2,F2RL2,PARP14,EIF2AK2,PRRX1,SORL1,BRCA1,BMF,DDX58,MDK,IFIH1,MLLT3,NUPR1
GO:BP	positive regulation of signaling	GO:0023056	0.00700697	31	GAS2L2,FFAR4,ASPM,IRF7,TTK,GHSR,STOX1,NDC80,CCN4,BANK1,NLRC5,FN1,TNFRSF19,DHX58,ZBP1,GPBAR1,RSAD2,TNFSF10,PPP5C,ROBO2,MAD2L1,NOD2,IQGAP3,TMEM106A,RASL10B,SFRP2,F2RL2,PARP14,EIF2AK2,PRRX1,SORL1
GO:BP	sister chromatid cohesion	GO:0007062	0.00718872	5	BUB1B,CDC20,BUB1,KIF22,SGO1
GO:BP	chromosome movement towards spindle pole	GO:0051305	0.00751856	2	CENPE,DLGAP5
GO:BP	germ cell development	GO:0007281	0.00772633	15	ASPM,AURKA,KNL1,CATSPER4,ZMYND15,CCNB1,MDK,CFAP69,CDC25B,BRCA2,SMARCA2,BBS2,HEXB,ACVR1,HMGB2
GO:BP	response to herbicide	GO:0009635	0.00774346	1	CYP1A1
GO:BP	lipid hydroxylation	GO:0002933	0.00774346	1	CYP1A1
GO:BP	retinoic acid biosynthetic process	GO:0002138	0.00774346	1	CYP1A1
GO:BP	positive regulation of cell cycle checkpoint	GO:1901978	0.00789429	3	NDC80,MAD2L1,GEN1
GO:BP	regulation of leukocyte chemotaxis	GO:0002688	0.00789429	9	CXCL10,C3AR1,NOD2,MDK,PLA2G7,MMP28,WNT5A,EDN1,S100A14
GO:BP	cellular response to chemical stimulus	GO:0070887	0.00828422	16	CYP1A1,GLYAT,IFI6,ISG15,CXCL10,MX1,ABCC8,IFIT1,GSTA1,WNT6,FMOD,IFIT3,XAF1,SHCBP1,IRF7,C3AR1
GO:BP	spindle assembly involved in meiosis	GO:0090306	0.00846835	2	ASPM,AURKA
GO:BP	cytoplasmic pattern recognition receptor signaling pathway in response to virus	GO:0039528	0.00851939	4	IRF7,DHX58,DDX58,IFIH1
GO:BP	diterpenoid biosynthetic process	GO:0016102	0.00851939	1	CYP1A1
GO:BP	meiosis I cell cycle process	GO:0061982	0.00851939	9	TDRD9,TOP2A,AURKA,CKS2,RAD54L,SGO1,PTTG1,CDC25B,BRCA2
GO:BP	regulation of meiotic cell cycle	GO:0051445	0.00851939	3	ASPM,TTK,CDC20
GO:BP	coumarin metabolic process	GO:0009804	0.00851939	1	CYP1A1
GO:BP	organonitrogen compound metabolic process	GO:1901564	0.00851939	8	CYP1A1,GLYAT,ASPG,IDO1,IFI6,ISG15,CXCL10,PRSS35
GO:BP	phenylpropanoid metabolic process	GO:0009698	0.00851939	1	CYP1A1
GO:BP	regulation of defense response to virus by host	GO:0050691	0.00902281	5	DDX58,STAT1,PML,IL15,PARP9
GO:BP	negative regulation of hormone secretion	GO:0046888	0.00902281	3	ABCC8,FFAR4,GHSR
GO:BP	actomyosin contractile ring assembly	GO:0000915	0.00902281	2	ANLN,RACGAP1
GO:BP	nucleosome organization	GO:0034728	0.00902281	7	CENPW,HJURP,CENPA,KNL1,CENPT,CENPN,MIS18BP1
GO:BP	female gamete generation	GO:0007292	0.00902281	10	ASPM,TTK,TOP2A,AURKA,CCNB1,MDK,CDC25B,BRCA2,TNFAIP6,HEXB
GO:BP	assembly of actomyosin apparatus involved in cytokinesis	GO:0000912	0.00902281	2	ANLN,RACGAP1
GO:BP	positive regulation of multicellular organismal process	GO:0051240	0.00914538	41	ISG15,ABCC8,FFAR4,WNT6,ASPM,IRF7,C3AR1,GHSR,CAMK2B,CDK1,STOX1,ZNF365,FN1,DHX58,ZBP1,RSAD2,ROBO2,GATM,NOD2,IQGAP3,TMEM106A,SFRP2,EIF2AK2,SORL1,CCNB1,BRCA1,DDX58,MDK,IFIH1,NPNT,WNT5A,STAT1,IL15,ASPA,PLXNA4,VDR,EDN1,MUSTN1,LAPTM5,ABI3BP,AGRN
GO:BP	omega-hydroxylase P450 pathway	GO:0097267	0.00924591	1	CYP1A1
GO:BP	inflammatory cell apoptotic process	GO:0006925	0.00924591	3	IRF7,GHSR,NOD2
GO:BP	positive regulation of mitochondrial ATP synthesis coupled electron transport	GO:1905448	0.00925603	2	CDK1,CCNB1
GO:BP	multi-multicellular organism process	GO:0044706	0.00931742	3	CYP1A1,IDO1,ABCC8
GO:BP	amine metabolic process	GO:0009308	0.00963241	2	CYP1A1,IDO1
GO:BP	establishment of spindle localization	GO:0051293	0.00987392	4	NDC80,CENPA,NUSAP1,MAD2L1
GO:BP	response to insecticide	GO:0017085	0.0100601	1	CYP1A1
GO:BP	interferon-alpha production	GO:0032607	0.0101564	4	IRF7,DDX58,IFIH1,STAT1
GO:BP	regulation of interferon-alpha production	GO:0032647	0.0101564	4	IRF7,DDX58,IFIH1,STAT1
GO:BP	keratan sulfate catabolic process	GO:0042340	0.0101767	2	FMOD,ACAN
GO:BP	response to vitamin	GO:0033273	0.0102635	2	CYP1A1,CXCL10
GO:BP	regulation of cyclin-dependent protein kinase activity	GO:1904029	0.0102635	6	STOX1,CDKN3,CDKN2C,CCNB1,CCNB3,CKS2
GO:BP	chromatin assembly	GO:0031497	0.0103065	7	CENPW,HJURP,CENPA,KNL1,CENPT,CENPN,MIS18BP1
GO:BP	regulation of response to interferon-gamma	GO:0060330	0.0107047	4	NLRC5,PARP14,STAT1,PARP9
GO:BP	regulation of interferon-gamma-mediated signaling pathway	GO:0060334	0.0107047	4	NLRC5,PARP14,STAT1,PARP9
GO:BP	microtubule depolymerization	GO:0007019	0.0108969	3	GAS2L2,KIF2C,CKAP2
GO:BP	positive regulation of G2/M transition of mitotic cell cycle	GO:0010971	0.0108969	4	CDK1,STOX1,CCNB1,CDC25B
GO:BP	negative chemotaxis	GO:0050919	0.0112175	5	ROBO2,SEMA3G,WNT5A,SEMA6C,PLXNA4
GO:BP	apoptotic process involved in mammary gland involution	GO:0060057	0.0115673	2	PML,VDR
GO:BP	positive regulation of apoptotic process involved in mammary gland involution	GO:0060058	0.0115673	2	PML,VDR
GO:BP	xenobiotic catabolic process	GO:0042178	0.0115673	1	CYP1A1
GO:BP	actomyosin contractile ring organization	GO:0044837	0.0121566	2	ANLN,RACGAP1
GO:BP	regulation of neuroblast migration	GO:0061853	0.0121566	1	ABCC8
GO:BP	uterine smooth muscle relaxation	GO:0044558	0.0121566	1	ABCC8
GO:BP	regulation of uterine smooth muscle relaxation	GO:1900719	0.0121566	1	ABCC8
GO:BP	positive regulation of uterine smooth muscle relaxation	GO:1900721	0.0121566	1	ABCC8
GO:BP	positive regulation of relaxation of smooth muscle	GO:1901082	0.0121566	1	ABCC8
GO:BP	negative regulation of neuroblast migration	GO:0061855	0.0121566	1	ABCC8
GO:BP	response to chemical	GO:0042221	0.012837	19	CYP1A1,GLYAT,IFI6,ISG15,CXCL10,MX1,ABCC8,IFIT1,FFAR4,GSTA1,WNT6,FMOD,IFIT3,CENPF,XAF1,SLC22A18,SHCBP1,IRF7,C3AR1
GO:BP	negative regulation of myoblast fusion	GO:1901740	0.0129143	1	CXCL10
GO:BP	terpenoid biosynthetic process	GO:0016114	0.0129143	1	CYP1A1
GO:BP	parturition	GO:0007567	0.0129143	1	CYP1A1
GO:BP	regulation of response to external stimulus	GO:0032101	0.0131923	34	ISG15,CXCL10,ABCC8,IFIT1,FFAR4,FCGR3A,IRF7,C3AR1,GHSR,CCN4,NLRC5,DHX58,ZBP1,GPBAR1,ROBO2,NOD2,PARP14,DDX58,MDK,NUPR1,CAPN3,PLA2G7,MMP28,GLP1R,PLSCR1,SEMA3G,WNT5A,STAT1,PML,IL15,SEMA6C,PLXNA4,PARP9,EDN1
GO:BP	positive regulation of type I interferon production	GO:0032481	0.0131941	6	IRF7,DHX58,ZBP1,DDX58,IFIH1,STAT1
GO:BP	response to external stimulus	GO:0009605	0.013235	29	CYP1A1,IFI6,ISG15,CXCL10,MX1,ABCC8,IFIT1,FFAR4,THRSP,FCGR3A,IFIT3,XAF1,IRF7,C3AR1,GHSR,CAMK2B,CFB,CCN4,IFI44L,GBP6,ACKR4,IFI44,RTP4,BANK1,NLRC5,DHX58,ZBP1,GPBAR1,RSAD2
GO:BP	regulation of synapse maturation	GO:0090128	0.013263	2	CAMK2B,CDC20
GO:BP	positive regulation of interferon-beta production	GO:0032728	0.0132963	4	IRF7,DHX58,DDX58,IFIH1
GO:BP	positive regulation of ubiquitin protein ligase activity	GO:1904668	0.0134608	2	CDC20,UBE2C
GO:BP	regulation of myeloid cell apoptotic process	GO:0033032	0.0137186	3	IRF7,GHSR,NOD2
GO:BP	regulation of cytokinesis	GO:0032465	0.0137186	7	AURKA,KIF23,KIF20A,RACGAP1,PRC1,CDC25B,BRCA2
GO:BP	proteolysis	GO:0006508	0.0137772	42	IFI6,ISG15,PRSS35,DPEP3,RHBDL1,DPEP2,BUB1B,COL28A1,CDK1,CFB,ACAN,CDC20,UBE2C,AURKA,MELTF,RNF213,FN1,TNFSF10,BIRC5,XPNPEP2,ADAMTS6,MAD2L1,UCHL1,SFRP2,UBE2L6,SORL1,CCNB1,CLSPN,BRCA1,DDX58,PIK3IP1,IFIH1,NUPR1,TLL1,CAPN3,MMP28,MGMT,PML,ADAMTSL2,ATP2A3,PTTG1,CPQ
GO:BP	regulation of cytokine-mediated signaling pathway	GO:0001959	0.0137911	10	ISG15,IRF7,NLRC5,ZBP1,PARP14,WNT5A,STAT1,PARP9,EDN1,LAPTM5
GO:BP	negative regulation of somatostatin secretion	GO:0090275	0.0141652	1	FFAR4
GO:BP	cellular component organization or biogenesis	GO:0071840	0.0141652	95	IFI6,CXCL10,GAS2L2,MX1,ABCC8,TDRD9,CENPW,FMOD,KIF4A,CENPF,ASPM,TTK,BUB1B,GHSR,COL28A1,CAMK2B,SPC24,CDK1,CENPE,STOX1,NDC80,ACAN,CDC20,CEP55,FOXM1,CDCA8,UBE2C,HJURP,KIF2C,CKAP2,PCLAF,ANLN,CENPA,TOP2A,AURKA,MELTF,DLGAP5,RTP4,RNF213,ZNF365,KNL1,VIT,MKI67,FN1,NUSAP1,GPBAR1,COL4A6,TNFSF10,BUB1,KIF23,ABCB1,NUF2,PPP5C,BIRC5,CENPT,OLFML2B,ADAMTS6,ROBO2,KIF20A,RACGAP1,CDKN2C,CENPN,MAD2L1,MIS18BP1,NOXO1,RRM…
GO:BP	hepatocyte differentiation	GO:0070365	0.0141652	1	CYP1A1
GO:BP	branching morphogenesis of an epithelial tube	GO:0048754	0.0142248	10	WNT6,SFRP2,MDK,NPNT,WNT5A,PML,VDR,EDN1,CELSR1,ACVR1
GO:BP	planar cell polarity pathway involved in neural tube closure	GO:0090179	0.014731	3	SFRP2,WNT5A,CELSR1
GO:BP	positive regulation of cell cycle G2/M phase transition	GO:1902751	0.0147506	4	CDK1,STOX1,CCNB1,CDC25B
GO:BP	flavonoid metabolic process	GO:0009812	0.0147506	1	CYP1A1
GO:BP	regulation of leukocyte apoptotic process	GO:2000106	0.0147506	3	IDO1,IRF7,GHSR
GO:BP	hydrogen peroxide biosynthetic process	GO:0050665	0.0147506	1	CYP1A1
GO:BP	negative regulation of non-canonical Wnt signaling pathway	GO:2000051	0.015041	2	RNF213,SFRP2
GO:BP	regulation of reproductive process	GO:2000241	0.0156239	9	ASPM,TTK,CDC20,AURKA,NUPR1,TPPP2,WNT5A,CFAP69,CDC25B
GO:BP	organelle organization	GO:0006996	0.0159475	62	IFI6,GAS2L2,MX1,TDRD9,CENPW,KIF4A,CENPF,ASPM,TTK,BUB1B,GHSR,SPC24,CDK1,CENPE,STOX1,NDC80,CDC20,CDCA8,UBE2C,HJURP,KIF2C,CKAP2,PCLAF,ANLN,CENPA,TOP2A,AURKA,DLGAP5,ZNF365,KNL1,MKI67,NUSAP1,TNFSF10,BUB1,KIF23,NUF2,PPP5C,BIRC5,CENPT,KIF20A,RACGAP1,CENPN,MAD2L1,MIS18BP1,KIF22,IQGAP3,KNTC1,KIFC1,NEK2,KIF11,SKA3,CCNB1,BRCA1,PRC1,BMF,RETREG1,ZNFX1,CKS2,RAD54L,MDK,MLLT3,NUPR1
GO:BP	oocyte maturation	GO:0001556	0.0161803	4	AURKA,CCNB1,CDC25B,BRCA2
GO:BP	regulation of ubiquitin protein ligase activity	GO:1904666	0.0164033	3	CDC20,UBE2C,MAD2L1
GO:BP	DNA repair	GO:0006281	0.0164949	21	ISG15,CDK1,FOXM1,PCLAF,NEIL3,ZNF365,PPP5C,KIF22,UBE2L6,PRRX1,CLSPN,BRCA1,RAD54L,MGMT,PML,PTTG1,RHNO1,PARP9,GEN1,ZSWIM7,BRCA2
GO:BP	tryptophan catabolic process to kynurenine	GO:0019441	0.016832	1	IDO1
GO:BP	epoxygenase P450 pathway	GO:0019373	0.016832	1	CYP1A1
GO:BP	cytoplasmic pattern recognition receptor signaling pathway	GO:0002753	0.016832	5	IRF7,DHX58,NOD2,DDX58,IFIH1
GO:BP	response to vitamin A	GO:0033189	0.016832	1	CYP1A1
GO:BP	positive regulation of MHC class I biosynthetic process	GO:0045345	0.016832	2	NLRC5,CIITA
GO:BP	response to bacterium	GO:0009617	0.016875	11	CYP1A1,ISG15,CXCL10,ABCC8,THRSP,GHSR,GBP6,IFI44,BANK1,NLRC5,DHX58
GO:BP	ISG15-protein conjugation	GO:0032020	0.0169415	2	ISG15,UBE2L6
GO:BP	porphyrin-containing compound metabolic process	GO:0006778	0.0173504	2	CYP1A1,GSTA1
GO:BP	negative regulation of syncytium formation by plasma membrane fusion	GO:0034242	0.0173997	1	CXCL10
GO:BP	chromatin assembly or disassembly	GO:0006333	0.0176009	7	CENPW,HJURP,CENPA,KNL1,CENPT,CENPN,MIS18BP1
GO:BP	mammary gland epithelium development	GO:0061180	0.0177418	6	IQGAP3,WNT5A,MGMT,PML,VDR,BRCA2
GO:BP	cell surface receptor signaling pathway	GO:0007166	0.0179023	17	IFI6,ISG15,CXCL10,MX1,IFIT1,WNT6,FCGR3A,FMOD,IFIT3,XAF1,ASPM,SHCBP1,IRF7,C3AR1,TTK,GHSR,CAMK2B
GO:BP	vitamin D metabolic process	GO:0042359	0.0180058	1	CYP1A1
GO:BP	regulation of establishment of planar polarity involved in neural tube closure	GO:0090178	0.0180058	3	SFRP2,WNT5A,CELSR1
GO:BP	regulation of axon extension involved in axon guidance	GO:0048841	0.0181586	4	SEMA3G,WNT5A,SEMA6C,PLXNA4
GO:BP	regulation of signal transduction	GO:0009966	0.0183445	55	IFI6,ISG15,GAS2L2,FFAR4,ASPM,IRF7,TTK,GHSR,CAMK2B,CDK1,STOX1,NDC80,CCN4,CEP55,FOXM1,AURKA,BANK1,RNF213,NLRC5,FN1,TNFRSF19,DHX58,ZBP1,GPBAR1,RSAD2,TNFSF10,NPTX2,LYPD1,PPP5C,ROBO2,RACGAP1,MAD2L1,NOD2,ARHGAP11A,UCHL1,IQGAP3,TMEM106A,SFRP2,F2RL2,KAZALD1,PARP14,EIF2AK2,PRRX1,SORL1,CCNB1,BRCA1,BMF,PIK3IP1,MDK,MLLT3,NUPR1,CAPN3,CILP,NPNT,RGS7BP
GO:BP	chromatin remodeling	GO:0006338	0.0185954	7	CENPW,HJURP,CENPA,KNL1,CENPT,CENPN,MIS18BP1
GO:BP	response to hyperoxia	GO:0055093	0.0185954	1	CYP1A1
GO:BP	regulation of negative chemotaxis	GO:0050923	0.0187801	2	ROBO2,PLXNA4
GO:BP	protein localization to microtubule cytoskeleton	GO:0072698	0.0187801	3	GAS2L2,TTK,AURKA
GO:BP	establishment of mitotic spindle orientation	GO:0000132	0.0188404	3	NDC80,CENPA,MAD2L1
GO:BP	myeloid cell apoptotic process	GO:0033028	0.0189328	3	IRF7,GHSR,NOD2
GO:BP	monocarboxylic acid metabolic process	GO:0032787	0.019219	2	CYP1A1,GLYAT
GO:BP	cellular response to DNA damage stimulus	GO:0006974	0.019219	28	ISG15,IRF7,CDK1,FOXM1,PCLAF,TOP2A,AURKA,NEIL3,ZNF365,PPP5C,KIF22,SFRP2,UBE2L6,PRRX1,CCNB1,CLSPN,BRCA1,RAD54L,NUPR1,MGMT,PML,PTTG1,RHNO1,PARP9,GEN1,ZSWIM7,CHCHD6,BRCA2
GO:BP	positive regulation of mitotic nuclear division	GO:0045840	0.0193367	3	AURKA,DLGAP5,NUSAP1
GO:BP	positive regulation of granulocyte chemotaxis	GO:0071624	0.0194507	4	C3AR1,MDK,EDN1,S100A14
GO:BP	meiotic spindle organization	GO:0000212	0.0194666	2	ASPM,AURKA
GO:BP	regulation of cilium movement involved in cell motility	GO:0060295	0.0194666	4	GAS2L2,TPPP2,CFAP69,BBS2
GO:BP	regulation of cilium-dependent cell motility	GO:1902019	0.0194666	4	GAS2L2,TPPP2,CFAP69,BBS2
GO:BP	negative regulation of cell death	GO:0060548	0.01947	22	IFI6,FFAR4,CCN5,IFIT3,IRF7,GHSR,CDK1,CCN4,AURKA,RNF213,TNFSF10,PPP5C,BIRC5,MAD2L1,NOD2,SFRP2,EIF2AK2,SORL1,BRCA1,RETREG1,MDK,NUPR1
GO:BP	regulation of prostaglandin-endoperoxide synthase activity	GO:0060584	0.0195658	2	NOD2,EDN1
GO:BP	positive regulation of prostaglandin-endoperoxide synthase activity	GO:0060585	0.0195658	2	NOD2,EDN1
GO:BP	cell cycle G1/S phase transition	GO:0044843	0.0195658	9	CYP1A1,CDK1,AURKA,CDKN3,SUSD2,CDKN2C,RRM2,IQGAP3,CCNB1
GO:BP	postreplication repair	GO:0006301	0.0195658	4	ISG15,PCLAF,UBE2L6,BRCA1
GO:BP	neuroblast migration	GO:0097402	0.0197784	1	ABCC8
GO:BP	regulation of relaxation of smooth muscle	GO:1901080	0.0197784	1	ABCC8
GO:BP	toxin metabolic process	GO:0009404	0.0197784	1	CYP1A1
GO:BP	regulation of neutrophil chemotaxis	GO:0090022	0.0197784	4	C3AR1,NOD2,MDK,EDN1
GO:BP	regulation of neurogenesis	GO:0050767	0.0197784	14	ABCC8,ASPM,CAMK2B,ZNF365,FN1,ROBO2,SORL1,MDK,BHLHE41,SEMA3G,WNT5A,SEMA6C,ASPA,PLXNA4
GO:BP	positive regulation of biomineral tissue development	GO:0070169	0.0202266	2	ISG15,WNT6
GO:BP	cellular response to copper ion	GO:0071280	0.0204272	1	CYP1A1
GO:BP	positive regulation of biomineralization	GO:0110151	0.0206218	2	ISG15,WNT6
GO:BP	multicellular organismal reproductive process	GO:0048609	0.0206218	30	CYP1A1,TDRD9,ASPM,TTK,GHSR,TOP2A,AURKA,KNL1,CATSPER4,ROBO2,RACGAP1,KIFC1,ZMYND15,CCNB1,MDK,TPPP2,CFAP54,PTTG1,CFAP69,CDC25B,VDR,EDN1,BRCA2,SMARCA2,TNFAIP6,BBS2,HEXB,SPATA24,ACVR1,HMGB2
GO:BP	response to immobilization stress	GO:0035902	0.0206218	1	CYP1A1
GO:BP	isoprenoid biosynthetic process	GO:0008299	0.0206218	1	CYP1A1
GO:BP	positive regulation of defense response to virus by host	GO:0002230	0.0206218	4	DDX58,STAT1,PML,PARP9
GO:BP	regulation of type III interferon production	GO:0034344	0.0206218	2	DDX58,IFIH1
GO:BP	cellular response to organic substance	GO:0071310	0.0206218	13	CYP1A1,IFI6,ISG15,CXCL10,MX1,ABCC8,IFIT1,WNT6,FMOD,IFIT3,XAF1,SHCBP1,IRF7
GO:BP	type III interferon production	GO:0034343	0.0206218	2	DDX58,IFIH1
GO:BP	detection of virus	GO:0009597	0.0206218	2	DDX58,IFIH1
GO:BP	'de novo' NAD biosynthetic process from tryptophan	GO:0034354	0.0206218	1	IDO1
GO:BP	regulation of cell cycle checkpoint	GO:1901976	0.0207072	4	NDC80,MAD2L1,CCNB1,GEN1
GO:BP	planar cell polarity pathway involved in axis elongation	GO:0003402	0.0207072	2	SFRP2,WNT5A
GO:BP	establishment of planar polarity involved in neural tube closure	GO:0090177	0.0207072	3	SFRP2,WNT5A,CELSR1
GO:BP	protein localization to cytoskeleton	GO:0044380	0.0209501	3	GAS2L2,TTK,AURKA
GO:BP	movement of cell or subcellular component	GO:0006928	0.0210162	65	CXCL10,GAS2L2,ABCC8,KIF4A,ASPM,C3AR1,CAMK2B,CDK1,CENPE,CCN4,KIF2C,ACKR4,ANLN,DLGAP5,FN1,KIF23,CATSPER4,ROBO2,KIF20A,RACGAP1,NOD2,KIF22,UCHL1,KIFC1,SFRP2,ARHGEF39,KIF15,KIF11,SORL1,DDX58,ITGB4,MDK,TPPP2,KNSTRN,PLA2G7,MMP28,CFAP54,ATRNL1,SEMA3G,WNT5A,PML,CFAP69,SLC7A10,SEMA6C,DOCK10,SLC7A7,PLXNA4,PARP9,PLVAP,EDN1,STMN1,TTC8,ENPP2,TNFAIP6,SYNE2,S100A14,KANK1,RAB13,CELSR1,GADD45A,BBS2,HYAL1,HEXB,ACVR…
GO:BP	reactive oxygen species metabolic process	GO:0072593	0.0212026	2	CYP1A1,IFI6
GO:BP	response to lipopolysaccharide	GO:0032496	0.0212026	3	CYP1A1,CXCL10,ABCC8
GO:BP	response to increased oxygen levels	GO:0036296	0.0214684	1	CYP1A1
GO:BP	symbiont intracellular protein transport in host	GO:0030581	0.0214684	1	IFIT1
GO:BP	intracellular transport of viral protein in host cell	GO:0019060	0.0214684	1	IFIT1
GO:BP	negative regulation of mitochondrial depolarization	GO:0051902	0.0214684	1	IFI6
GO:BP	response to iron ion	GO:0010039	0.0219609	1	CYP1A1
GO:BP	regulation of transferase activity	GO:0051338	0.0219609	21	CXCL10,CENPE,STOX1,CDC20,UBE2C,NLRC5,CDKN3,CDKN2C,MAD2L1,NOD2,UCHL1,IQGAP3,SFRP2,NEK2,EIF2AK2,SORL1,CCNB1,CLSPN,CCNB3,PIK3IP1,CKS2
GO:BP	negative regulation of asymmetric cell division	GO:0045769	0.0219609	1	ASPM
GO:BP	intracellular signal transduction	GO:0035556	0.0219609	46	IFI6,FFAR4,CENPF,IRF7,TTK,BUB1B,CAMK2B,CDK1,STOX1,NDC80,CDC20,CEP55,FOXM1,ACKR4,AURKA,DEPDC1,BANK1,NLRC5,FN1,TNFRSF19,DHX58,GPBAR1,TNFSF10,BUB1,PPP5C,RACGAP1,MAD2L1,NOD2,ARHGAP11A,UCHL1,IQGAP3,KNTC1,TMEM106A,SFRP2,F2RL2,ASB9,EIF2AK2,SORL1,CCNB1,CLSPN,BRCA1,BMF,DDX58,PIK3IP1,IFIH1,NUPR1
GO:BP	regulation of mitochondrial ATP synthesis coupled electron transport	GO:1905446	0.0219609	2	CDK1,CCNB1
GO:BP	response to drug	GO:0042493	0.0219609	15	CYP1A1,ABCC8,CENPF,CDK1,ABCB1,UCHL1,SFRP2,CCNB1,RAD54L,MDK,PTGR1,STAT1,MGMT,COL18A1,EDN1
GO:BP	positive regulation of leukocyte chemotaxis	GO:0002690	0.0222938	7	CXCL10,C3AR1,MDK,PLA2G7,WNT5A,EDN1,S100A14
GO:BP	long-chain fatty acid biosynthetic process	GO:0042759	0.0223805	1	CYP1A1
GO:BP	'de novo' NAD biosynthetic process	GO:0034627	0.0223805	1	IDO1
GO:BP	chromosome condensation	GO:0030261	0.0226764	5	CDK1,TOP2A,NUSAP1,CCNB1,SMC2
GO:BP	regulation of cell communication	GO:0010646	0.0226764	55	IFI6,ISG15,GAS2L2,ABCC8,FFAR4,ASPM,IRF7,TTK,GHSR,CAMK2B,CDK1,STOX1,NDC80,CCN4,CDC20,CEP55,FOXM1,AURKA,BANK1,RNF213,NLRC5,FN1,TNFRSF19,DHX58,ZBP1,GPBAR1,RSAD2,TNFSF10,NPTX2,LYPD1,PPP5C,BIRC5,ROBO2,RACGAP1,MAD2L1,NOD2,ARHGAP11A,UCHL1,IQGAP3,TMEM106A,RASL10B,SFRP2,F2RL2,KAZALD1,PARP14,EIF2AK2,PRRX1,SORL1,CCNB1,BRCA1,BMF,PIK3IP1,MDK,MLLT3,NUPR1
GO:BP	positive regulation of tumor necrosis factor production	GO:0032760	0.0228497	6	ABCC8,NOD2,TMEM106A,DDX58,IFIH1,WNT5A
GO:BP	retinoic acid metabolic process	GO:0042573	0.0228497	1	CYP1A1
GO:BP	protein phosphorylation	GO:0006468	0.0229737	28	CXCL10,TTK,BUB1B,CAMK2B,CDK1,CENPE,STOX1,AURKA,BANK1,FN1,BUB1,CDKN3,PPP5C,BIRC5,CDKN2C,NOD2,UCHL1,IQGAP3,SFRP2,NEK2,PARP14,CIITA,EIF2AK2,SORL1,CNTN1,CCNB1,CLSPN,CCNB3
GO:BP	positive regulation of nuclear division	GO:0051785	0.0230364	5	AURKA,DLGAP5,NUSAP1,WNT5A,EDN1
GO:BP	icosanoid metabolic process	GO:0006690	0.0230364	8	CYP1A1,GSTA1,DPEP2,EPHX1,PTGR1,EDN1,MGST2,PRXL2B
GO:BP	response to arsenic-containing substance	GO:0046685	0.0233096	1	CYP1A1
GO:BP	negative regulation of membrane depolarization	GO:1904180	0.0239202	1	IFI6
GO:BP	response to molecule of bacterial origin	GO:0002237	0.0239944	3	CYP1A1,CXCL10,ABCC8
GO:BP	response to nutrient	GO:0007584	0.0239944	2	CYP1A1,CXCL10
GO:BP	mitotic chromosome condensation	GO:0007076	0.0239944	4	CDK1,NUSAP1,CCNB1,SMC2
GO:BP	response to ionizing radiation	GO:0010212	0.0242696	9	CXCL10,SFRP2,BRCA1,RAD54L,MGMT,PML,RHNO1,BRCA2,GADD45A
GO:BP	leukocyte apoptotic process	GO:0071887	0.0244297	3	IDO1,IRF7,GHSR
GO:BP	positive regulation of animal organ morphogenesis	GO:0110110	0.0244616	4	STOX1,ROBO2,WNT5A,EDN1
GO:BP	positive regulation of response to external stimulus	GO:0032103	0.0244953	18	CXCL10,IRF7,C3AR1,GHSR,CCN4,NLRC5,DHX58,ZBP1,NOD2,MDK,NUPR1,PLA2G7,PLSCR1,WNT5A,IL15,PARP9,EDN1,MGST2
GO:BP	regulation of MHC class I biosynthetic process	GO:0045343	0.0247741	2	NLRC5,CIITA
GO:BP	MHC class I biosynthetic process	GO:0045341	0.0247741	2	NLRC5,CIITA
GO:BP	regulation of tight junction disassembly	GO:1905073	0.025183	1	ABCC8
GO:BP	response to food	GO:0032094	0.025183	1	CYP1A1
GO:BP	protein localization to meiotic spindle	GO:1905359	0.025183	1	TTK
GO:BP	protein localization to meiotic spindle midzone	GO:1903096	0.025183	1	TTK
GO:BP	negative regulation of blood-brain barrier permeability	GO:1905604	0.025183	1	ABCC8
GO:BP	regulation of response to biotic stimulus	GO:0002831	0.025183	14	ISG15,IFIT1,IRF7,NLRC5,DHX58,ZBP1,NOD2,PARP14,DDX58,PLSCR1,WNT5A,STAT1,PML,IL15
GO:BP	meiotic spindle assembly checkpoint signaling	GO:0033316	0.025183	1	TTK
GO:BP	positive regulation of relaxation of muscle	GO:1901079	0.025183	1	ABCC8
GO:BP	negative regulation of cytokine production	GO:0001818	0.025183	11	ISG15,FFAR4,GHSR,BANK1,NLRC5,FN1,DHX58,NOD2,UBE2L6,DDX58,IFIH1
GO:BP	positive regulation of tight junction disassembly	GO:1905075	0.025183	1	ABCC8
GO:BP	tight junction disassembly	GO:1905071	0.025183	1	ABCC8
GO:BP	neuron projection extension involved in neuron projection guidance	GO:1902284	0.025183	4	SEMA3G,WNT5A,SEMA6C,PLXNA4
GO:BP	axon extension involved in axon guidance	GO:0048846	0.025183	4	SEMA3G,WNT5A,SEMA6C,PLXNA4
GO:BP	oogenesis	GO:0048477	0.025183	7	ASPM,AURKA,CCNB1,MDK,CDC25B,BRCA2,HEXB
GO:BP	gamete generation	GO:0007276	0.025183	26	TDRD9,ASPM,TTK,GHSR,TOP2A,AURKA,KNL1,CATSPER4,RACGAP1,KIFC1,ZMYND15,CCNB1,MDK,TPPP2,CFAP54,PTTG1,CFAP69,CDC25B,BRCA2,SMARCA2,TNFAIP6,BBS2,HEXB,SPATA24,ACVR1,HMGB2
GO:BP	multicellular organism reproduction	GO:0032504	0.0254147	30	CYP1A1,TDRD9,ASPM,TTK,GHSR,TOP2A,AURKA,KNL1,CATSPER4,ROBO2,RACGAP1,KIFC1,ZMYND15,CCNB1,MDK,TPPP2,CFAP54,PTTG1,CFAP69,CDC25B,VDR,EDN1,BRCA2,SMARCA2,TNFAIP6,BBS2,HEXB,SPATA24,ACVR1,HMGB2
GO:BP	positive regulation of developmental process	GO:0051094	0.0254734	11	ISG15,FFAR4,WNT6,ASPM,C3AR1,GHSR,CAMK2B,CDK1,STOX1,CCN4,CDC20
GO:BP	tetrapyrrole metabolic process	GO:0033013	0.0255367	2	CYP1A1,GSTA1
GO:BP	positive regulation of inflammatory response	GO:0050729	0.0255367	8	CCN4,ZBP1,MDK,NUPR1,PLA2G7,WNT5A,IL15,MGST2
GO:BP	estrogen metabolic process	GO:0008210	0.0255367	1	CYP1A1
GO:BP	positive regulation of tumor necrosis factor superfamily cytokine production	GO:1903557	0.0255823	6	ABCC8,NOD2,TMEM106A,DDX58,IFIH1,WNT5A
GO:BP	regulation of signaling	GO:0023051	0.0257511	55	IFI6,ISG15,GAS2L2,ABCC8,FFAR4,ASPM,IRF7,TTK,GHSR,CAMK2B,CDK1,STOX1,NDC80,CCN4,CDC20,CEP55,FOXM1,AURKA,BANK1,RNF213,NLRC5,FN1,TNFRSF19,DHX58,ZBP1,GPBAR1,RSAD2,TNFSF10,NPTX2,LYPD1,PPP5C,BIRC5,ROBO2,RACGAP1,MAD2L1,NOD2,ARHGAP11A,UCHL1,IQGAP3,TMEM106A,RASL10B,SFRP2,F2RL2,KAZALD1,PARP14,EIF2AK2,PRRX1,SORL1,CCNB1,BRCA1,BMF,PIK3IP1,MDK,MLLT3,NUPR1
GO:BP	negative regulation of chemotaxis	GO:0050922	0.0257511	5	ROBO2,MMP28,SEMA3G,WNT5A,SEMA6C
GO:BP	regulation of granulocyte chemotaxis	GO:0071622	0.0263333	5	C3AR1,NOD2,MDK,EDN1,S100A14
GO:BP	response to copper ion	GO:0046688	0.0263612	1	CYP1A1
GO:BP	olfactory bulb interneuron development	GO:0021891	0.0263612	2	ROBO2,WNT5A
GO:BP	negative regulation of synapse assembly	GO:0051964	0.0263612	2	ROBO2,WNT5A
GO:BP	convergent extension involved in axis elongation	GO:0060028	0.0263612	2	SFRP2,WNT5A
GO:BP	glycine metabolic process	GO:0006544	0.0263612	1	GLYAT
GO:BP	regulation of defense response	GO:0031347	0.0266088	23	ISG15,IFIT1,FFAR4,FCGR3A,IRF7,GHSR,CCN4,NLRC5,DHX58,ZBP1,GPBAR1,NOD2,PARP14,DDX58,MDK,NUPR1,PLA2G7,GLP1R,PLSCR1,WNT5A,STAT1,PML,IL15
GO:BP	positive regulation of G1/S transition of mitotic cell cycle	GO:1900087	0.0267697	1	CYP1A1
GO:BP	establishment of spindle orientation	GO:0051294	0.0269781	3	NDC80,CENPA,MAD2L1
GO:BP	tryptophan catabolic process	GO:0006569	0.0270662	1	IDO1
GO:BP	establishment of planar polarity of embryonic epithelium	GO:0042249	0.0270662	3	SFRP2,WNT5A,CELSR1
GO:BP	indole-containing compound catabolic process	GO:0042436	0.0270662	1	IDO1
GO:BP	indolalkylamine catabolic process	GO:0046218	0.0270662	1	IDO1
GO:BP	protein localization to microtubule plus-end	GO:1904825	0.0274969	1	GAS2L2
GO:BP	response to stress	GO:0006950	0.0274969	35	CYP1A1,IFI6,ISG15,CXCL10,MX1,ABCC8,IFIT1,FFAR4,FCGR3A,IFIT3,XAF1,IRF7,C3AR1,GHSR,CAMK2B,CDK1,STOX1,CFB,CCN4,FOXM1,IFI44L,PCLAF,GBP6,TOP2A,AURKA,NEIL3,RTP4,NLRC5,ZNF365,FN1,TNFRSF19,DHX58,ZBP1,GPBAR1,RSAD2
GO:BP	protein localization to microtubule end	GO:1905725	0.0274969	1	GAS2L2
GO:BP	fat-soluble vitamin metabolic process	GO:0006775	0.0279798	1	CYP1A1
GO:BP	drug metabolic process	GO:0017144	0.0279798	1	CYP1A1
GO:BP	multi-organism process	GO:0051704	0.0279798	9	CYP1A1,IDO1,ABCC8,IFIT1,TDRD9,ASPM,TTK,GHSR,CDK1
GO:BP	karyogamy	GO:0000741	0.0284312	1	CDK1
GO:BP	pronuclear fusion	GO:0007344	0.0284312	1	CDK1
GO:BP	DNA methylation	GO:0006306	0.0284737	2	CYP1A1,TDRD9
GO:BP	DNA alkylation	GO:0006305	0.0284737	2	CYP1A1,TDRD9
GO:BP	kynurenine metabolic process	GO:0070189	0.0286	1	IDO1
GO:BP	regulation of somatostatin secretion	GO:0090273	0.0286	1	FFAR4
GO:BP	positive regulation of glucagon secretion	GO:0070094	0.0286	1	FFAR4
GO:BP	microtubule plus-end directed mitotic chromosome migration	GO:0099606	0.0286	1	CENPE
GO:BP	retinol metabolic process	GO:0042572	0.0286	1	CYP1A1
GO:BP	regulation of mitotic centrosome separation	GO:0046602	0.0288484	2	NEK2,KIF11
GO:BP	regulation of endothelial tube morphogenesis	GO:1901509	0.0290091	1	CXCL10
GO:BP	response to antibiotic	GO:0046677	0.0290091	1	CYP1A1
GO:BP	positive regulation of otic vesicle morphogenesis	GO:1904120	0.0294754	1	STOX1
GO:BP	regulation of otic vesicle morphogenesis	GO:1904118	0.0294754	1	STOX1
GO:BP	regulation of interferon-beta production	GO:0032648	0.0295391	4	IRF7,DHX58,DDX58,IFIH1
GO:BP	signal transduction	GO:0007165	0.0295391	31	IFI6,ISG15,CXCL10,GAS2L2,MX1,IFIT1,FFAR4,CCN5,WNT6,FCGR3A,FMOD,IFIT3,CENPF,XAF1,ASPM,RHBDL1,SHCBP1,IRF7,C3AR1,TTK,BUB1B,GHSR,CAMK2B,CDK1,GABBR2,STOX1,NDC80,CCN4,CDC20,CEP55,FOXM1
GO:BP	interferon-beta production	GO:0032608	0.0295391	4	IRF7,DHX58,DDX58,IFIH1
GO:BP	synapse maturation	GO:0060074	0.0297136	2	CAMK2B,CDC20
GO:BP	cell-cell junction disassembly	GO:0150147	0.0302388	1	ABCC8
GO:BP	tryptophan metabolic process	GO:0006568	0.0302388	1	IDO1
GO:BP	G1/S transition of mitotic cell cycle	GO:0000082	0.0303017	8	CYP1A1,CDK1,AURKA,CDKN3,CDKN2C,RRM2,IQGAP3,CCNB1
GO:BP	regulation of multicellular organismal development	GO:2000026	0.0303152	11	ISG15,CXCL10,ABCC8,WNT6,ASPM,IRF7,C3AR1,GHSR,CAMK2B,CDK1,CCN4
GO:BP	response to interferon-alpha	GO:0035455	0.0314331	3	IFIT3,EIF2AK2,IFIT2
GO:BP	xenobiotic transport	GO:0042908	0.0316623	3	SLC47A2,SLC22A18,ABCB1
GO:BP	interleukin-1 beta production	GO:0032611	0.0320551	6	FFAR4,GHSR,NOD2,TMEM106A,WNT5A,PML
GO:BP	organic substance catabolic process	GO:1901575	0.0320551	4	CYP1A1,ASPG,IDO1,ISG15
GO:BP	regulation of interleukin-1 beta production	GO:0032651	0.0320551	6	FFAR4,GHSR,NOD2,TMEM106A,WNT5A,PML
GO:BP	hydrogen peroxide metabolic process	GO:0042743	0.0320551	1	CYP1A1
GO:BP	positive regulation of T cell apoptotic process	GO:0070234	0.0320551	1	IDO1
GO:BP	regulation of cyclin-dependent protein serine/threonine kinase activity	GO:0000079	0.0320551	5	CDKN3,CDKN2C,CCNB1,CCNB3,CKS2
GO:BP	keratan sulfate biosynthetic process	GO:0018146	0.0322544	2	FMOD,ACAN
GO:BP	multi-organism reproductive process	GO:0044703	0.0322544	34	CYP1A1,IDO1,ABCC8,TDRD9,ASPM,TTK,GHSR,CDK1,TOP2A,AURKA,KNL1,CATSPER4,RACGAP1,KIFC1,ZMYND15,CCNB1,ITGB4,MDK,TPPP2,CFAP54,PTTG1,CFAP69,CDC25B,VDR,EDN1,BRCA2,UCP2,SMARCA2,TNFAIP6,BBS2,HEXB,SPATA24,ACVR1,HMGB2
GO:BP	cellular response to stimulus	GO:0051716	0.0322576	55	CYP1A1,GLYAT,IFI6,ISG15,CXCL10,GAS2L2,MX1,ABCC8,IFIT1,FFAR4,GSTA1,CCN5,WNT6,FCGR3A,FMOD,IFIT3,CENPF,XAF1,ASPM,RHBDL1,SHCBP1,IRF7,C3AR1,TTK,BUB1B,GHSR,CAMK2B,CDK1,GABBR2,STOX1,NDC80,CCN4,CDC20,CEP55,FOXM1,PCLAF,GBP6,ACKR4,TOP2A,AURKA,DEPDC1,DLGAP5,NEIL3,BANK1,RNF213,FMO2,NLRC5,ZNF365,FN1,TNFRSF19,DHX58,ZBP1,GPBAR1,RSAD2,COL4A6
GO:BP	positive regulation of cell cycle G1/S phase transition	GO:1902808	0.0322576	1	CYP1A1
GO:BP	chemorepulsion of axon	GO:0061643	0.032335	2	WNT5A,PLXNA4
GO:BP	glycosaminoglycan metabolic process	GO:0030203	0.032335	4	GALNT5,FMOD,ACAN,HMMR
GO:BP	positive regulation of apoptotic process involved in morphogenesis	GO:1902339	0.0329531	2	PML,VDR
GO:BP	negative regulation of innate immune response	GO:0045824	0.033357	4	ISG15,NLRC5,DHX58,PARP14
GO:BP	xenobiotic transport across blood-brain barrier	GO:1990962	0.0335347	2	ABCB1,ABCG2
GO:BP	positive regulation of response to interferon-gamma	GO:0060332	0.0335937	2	NLRC5,PARP9
GO:BP	positive regulation of interferon-gamma-mediated signaling pathway	GO:0060335	0.0335937	2	NLRC5,PARP9
GO:BP	morphogenesis of a branching epithelium	GO:0061138	0.0335937	10	WNT6,SFRP2,MDK,NPNT,WNT5A,PML,VDR,EDN1,CELSR1,ACVR1
GO:BP	positive regulation of erythrocyte differentiation	GO:0045648	0.0336262	4	ISG15,STAT1,FAM210B,HMGB2
GO:BP	arachidonic acid metabolic process	GO:0019369	0.0337176	1	CYP1A1
GO:BP	reactive oxygen species biosynthetic process	GO:1903409	0.0337176	1	CYP1A1
GO:BP	small molecule catabolic process	GO:0044282	0.0337176	2	CYP1A1,IDO1
GO:BP	positive regulation of cell population proliferation	GO:0008284	0.034001	9	CXCL10,ASPM,TTK,GHSR,CDK1,STOX1,CCN4,CDC20,FOXM1
GO:BP	chemical homeostasis	GO:0048878	0.034001	5	IFI6,CXCL10,ABCC8,IFIT1,FFAR4
GO:BP	positive regulation of cytokine production involved in immune response	GO:0002720	0.034039	5	RSAD2,NOD2,DDX58,WNT5A,LAPTM5
GO:BP	cartilage development	GO:0051216	0.0340717	9	CCN4,ACAN,SFRP2,PRRX1,MDK,WNT5A,MGP,EDN1,MUSTN1
GO:BP	organonitrogen compound catabolic process	GO:1901565	0.034299	41	IDO1,ISG15,GSTA1,FMOD,BUB1B,CDK1,ACAN,CDC20,UBE2C,HMMR,AURKA,RNF213,MAD2L1,UCHL1,NT5C,SARDH,ASB9,UBE2L6,SORL1,CCNB1,ALDH1L1,NUPR1,TST,CAPN3,PLA2G7,WNT5A,PML,PTTG1,CPQ,ASPA,GM2A,ABCG2,LAPTM5,AGRN,ENPP2,UROC1,QDPR,SGSH,HYAL1,HEXB,RNF187
GO:BP	positive regulation of mesenchymal cell proliferation	GO:0002053	0.0343171	3	PRRX1,WNT5A,STAT1
GO:BP	regulation of cilium beat frequency involved in ciliary motility	GO:0060296	0.0343171	1	GAS2L2
GO:BP	regulation of response to stress	GO:0080134	0.0344925	17	ISG15,ABCC8,IFIT1,FFAR4,FCGR3A,IRF7,GHSR,CAMK2B,STOX1,CCN4,FOXM1,NLRC5,ZNF365,TNFRSF19,DHX58,ZBP1,GPBAR1
GO:BP	somatostatin secretion	GO:0070253	0.0346642	1	FFAR4
GO:BP	regulation of locomotion	GO:0040012	0.035103	35	CXCL10,GAS2L2,ABCC8,C3AR1,GHSR,CAMK2B,CCN4,FN1,ROBO2,NOD2,SFRP2,ARHGEF39,SORL1,DDX58,MDK,TPPP2,PLA2G7,MMP28,SEMA3G,WNT5A,CFAP69,SEMA6C,DOCK10,PLXNA4,PLVAP,EDN1,ENPP2,TNFAIP6,SYNE2,S100A14,KANK1,GADD45A,BBS2,HYAL1,ACVR1
GO:BP	regeneration	GO:0031099	0.0352297	10	CDK1,AURKA,PRRX1,CCNB1,MDK,CAPN3,CPQ,MUSTN1,UCP2,NREP
GO:BP	viral life cycle	GO:0019058	0.0352297	3	ISG15,MX1,IFIT1
GO:BP	histone-serine phosphorylation	GO:0035404	0.0352581	2	AURKA,CCNB1
GO:BP	sulfur compound catabolic process	GO:0044273	0.0352581	5	FMOD,ACAN,TST,HYAL1,HEXB
GO:BP	positive regulation of myeloid leukocyte cytokine production involved in immune response	GO:0061081	0.035647	3	DDX58,WNT5A,LAPTM5
GO:BP	negative regulation of insulin secretion	GO:0046676	0.0356768	2	ABCC8,GHSR
GO:BP	secondary metabolic process	GO:0019748	0.0357752	1	CYP1A1
GO:BP	negative regulation of type I interferon-mediated signaling pathway	GO:0060339	0.036032	2	ISG15,NLRC5
GO:BP	regulation of biological quality	GO:0065008	0.036032	9	CYP1A1,IFI6,ISG15,CXCL10,GAS2L2,MX1,ABCC8,IFIT1,FFAR4
GO:BP	positive regulation of lymphocyte apoptotic process	GO:0070230	0.036032	1	IDO1
GO:BP	septin ring assembly	GO:0000921	0.036032	1	ANLN
GO:BP	positive regulation of leukocyte migration	GO:0002687	0.0365041	8	CXCL10,C3AR1,MDK,PLA2G7,WNT5A,PLVAP,EDN1,S100A14
GO:BP	hyaluronan catabolic process	GO:0030214	0.0367866	3	HMMR,HYAL1,HEXB
GO:BP	mitotic G2/M transition checkpoint	GO:0044818	0.0368118	3	CDK1,CLSPN,BRCA1
GO:BP	positive regulation of oligodendrocyte differentiation	GO:0048714	0.0369327	3	ZNF365,MDK,ASPA
GO:BP	nitric-oxide synthase biosynthetic process	GO:0051767	0.0372803	3	NOD2,STAT1,EDN1
GO:BP	regulation of neutrophil migration	GO:1902622	0.0372803	4	C3AR1,NOD2,MDK,EDN1
GO:BP	positive regulation of MHC class II biosynthetic process	GO:0045348	0.0372803	2	TMEM106A,CIITA
GO:BP	xenobiotic detoxification by transmembrane export across the plasma membrane	GO:1990961	0.0372803	2	SLC22A18,ABCB1
GO:BP	regulation of nitric-oxide synthase biosynthetic process	GO:0051769	0.0372803	3	NOD2,STAT1,EDN1
GO:BP	aromatic amino acid family catabolic process	GO:0009074	0.0373145	1	IDO1
GO:BP	indolalkylamine metabolic process	GO:0006586	0.0373145	1	IDO1
GO:BP	glycosaminoglycan biosynthetic process	GO:0006024	0.0374461	3	GALNT5,FMOD,ACAN
GO:BP	positive regulation of dendritic cell cytokine production	GO:0002732	0.03757	2	NOD2,DDX58
GO:BP	regulation of cell development	GO:0060284	0.0376799	16	ABCC8,ASPM,CAMK2B,AURKA,MELTF,ZNF365,FN1,ROBO2,SORL1,MDK,BHLHE41,SEMA3G,WNT5A,SEMA6C,ASPA,PLXNA4
GO:BP	regulation of macrophage chemotaxis	GO:0010758	0.037887	3	C3AR1,MDK,MMP28
GO:BP	demethylation	GO:0070988	0.0380495	1	CYP1A1
GO:BP	transforming growth factor beta receptor complex assembly	GO:0007181	0.0383705	1	FMOD
GO:BP	negative regulation of helicase activity	GO:0051097	0.0383705	1	IFIT1
GO:BP	meiotic spindle checkpoint signaling	GO:0044779	0.0388223	1	TTK
GO:BP	hematopoietic stem cell proliferation	GO:0071425	0.0391132	3	SFRP2,EIF2AK2,WNT5A
GO:BP	negative regulation of interleukin-1 beta production	GO:0032691	0.0393037	2	FFAR4,GHSR
GO:BP	meiotic chromosome separation	GO:0051307	0.0393989	2	TTK,TOP2A
GO:BP	aminoglycan metabolic process	GO:0006022	0.0393989	4	GALNT5,FMOD,ACAN,HMMR
GO:BP	DNA damage response, signal transduction by p53 class mediator resulting in cell cycle arrest	GO:0006977	0.0395433	5	CDK1,AURKA,CCNB1,PML,GADD45A
GO:BP	keratan sulfate metabolic process	GO:0042339	0.0397496	2	FMOD,ACAN
GO:BP	negative regulation of response to external stimulus	GO:0032102	0.0398315	16	ISG15,ABCC8,FFAR4,FCGR3A,GHSR,NLRC5,DHX58,GPBAR1,ROBO2,NOD2,PARP14,MDK,MMP28,GLP1R,SEMA3G,WNT5A
GO:BP	cell population proliferation	GO:0008283	0.0399195	34	CYP1A1,CXCL10,ABCC8,IFIT3,ASPM,SHCBP1,TTK,GHSR,CDK1,STOX1,CCN4,CDC20,FOXM1,LMO1,MKI67,FN1,GPBAR1,BUB1,ABCB1,CDKN3,BIRC5,RACGAP1,CDKN2C,NOD2,UCHL1,IQGAP3,SFRP2,EIF2AK2,PRRX1,CCNB1,PRC1,CKS2,MDK,NUPR1
GO:BP	regulation by virus of viral protein levels in host cell	GO:0046719	0.0399195	2	IFIT1,STAT1
GO:BP	ventricular cardiac muscle cell development	GO:0055015	0.0399979	2	CDK1,CCNB1
GO:BP	positive regulation of fibroblast proliferation	GO:0048146	0.0399998	4	FN1,CCNB1,WNT5A,PML
GO:BP	peptidyl-threonine phosphorylation	GO:0018107	0.0401108	3	TTK,CDK1,STOX1
GO:BP	DNA methylation or demethylation	GO:0044728	0.0401761	2	CYP1A1,TDRD9
GO:BP	DNA metabolic process	GO:0006259	0.0403028	18	CYP1A1,ISG15,TDRD9,CENPF,CDK1,STOX1,FOXM1,PCLAF,TOP2A,NEIL3,ZNF365,PPP5C,KIF22,NEK2,UBE2L6,PRRX1,CLSPN,BRCA1
GO:BP	negative regulation of microtubule depolymerization	GO:0007026	0.0409889	2	GAS2L2,CKAP2
GO:BP	small intestinal transit	GO:0120055	0.0410621	1	GHSR
GO:BP	intestinal motility	GO:0120054	0.0410621	1	GHSR
GO:BP	regulation of hindgut contraction	GO:0043134	0.0410621	1	GHSR
GO:BP	signaling	GO:0023052	0.0410621	32	IFI6,ISG15,CXCL10,GAS2L2,MX1,ABCC8,IFIT1,FFAR4,CCN5,WNT6,FCGR3A,FMOD,IFIT3,CENPF,XAF1,ASPM,RHBDL1,SHCBP1,IRF7,C3AR1,TTK,BUB1B,GHSR,CAMK2B,CDK1,GABBR2,STOX1,NDC80,CCN4,CDC20,CEP55,FOXM1
GO:BP	hindgut contraction	GO:0043133	0.0410621	1	GHSR
GO:BP	negative regulation of locomotion involved in locomotory behavior	GO:0090327	0.0410621	1	GHSR
GO:BP	regulation of small intestinal transit	GO:0120057	0.0410621	1	GHSR
GO:BP	positive regulation of small intestinal transit	GO:0120058	0.0410621	1	GHSR
GO:BP	response to monosodium glutamate	GO:1904008	0.0410621	1	GHSR
GO:BP	regulation of DNA strand resection involved in replication fork processing	GO:0110026	0.0410621	1	ZNF365
GO:BP	negative regulation of leukocyte apoptotic process	GO:2000107	0.0411351	3	IRF7,GHSR,NOD2
GO:BP	regulation of synapse structure or activity	GO:0050803	0.0411351	4	MX1,GHSR,CAMK2B,CDC20
GO:BP	regulation of response to stimulus	GO:0048583	0.0416063	94	IFI6,ISG15,CXCL10,GAS2L2,ABCC8,IFIT1,FFAR4,FCGR3A,ASPM,IRF7,C3AR1,TTK,GHSR,CAMK2B,CDK1,STOX1,NDC80,CFB,CCN4,CEP55,FOXM1,AURKA,BANK1,RNF213,NLRC5,ZNF365,FN1,TNFRSF19,DHX58,ZBP1,GPBAR1,RSAD2,TNFSF10,NPTX2,ABCB1,LYPD1,PPP5C,ROBO2,RACGAP1,MAD2L1,NOD2,ARHGAP11A,UCHL1,IQGAP3,TMEM106A,SFRP2,F2RL2,KAZALD1,PARP14,EIF2AK2,PRRX1,SORL1,CCNB1,BRCA1,BMF,DDX58,PIK3IP1,MDK,IFIH1,MLLT3,NUPR1,CAPN3,CILP,NPNT,RGS7B…
GO:BP	positive regulation of cyclin-dependent protein kinase activity	GO:1904031	0.0416447	3	STOX1,CCNB1,CKS2
GO:BP	branching involved in mammary gland duct morphogenesis	GO:0060444	0.0416447	3	WNT5A,PML,VDR
GO:BP	aminoglycan biosynthetic process	GO:0006023	0.0417472	3	GALNT5,FMOD,ACAN
GO:BP	glomerular visceral epithelial cell migration	GO:0090521	0.0417612	2	ANLN,KANK1
GO:BP	DNA damage response, signal transduction by p53 class mediator	GO:0030330	0.0417612	7	CDK1,FOXM1,AURKA,CCNB1,PML,BRCA2,GADD45A
GO:BP	cell communication	GO:0007154	0.0427619	32	IFI6,ISG15,CXCL10,GAS2L2,MX1,ABCC8,IFIT1,FFAR4,CCN5,WNT6,FCGR3A,FMOD,IFIT3,CENPF,XAF1,ASPM,RHBDL1,SHCBP1,IRF7,C3AR1,TTK,BUB1B,GHSR,CAMK2B,CDK1,GABBR2,STOX1,NDC80,CCN4,CDC20,CEP55,FOXM1
GO:BP	serine family amino acid metabolic process	GO:0009069	0.0431815	1	GLYAT
GO:BP	long-chain fatty acid metabolic process	GO:0001676	0.0435102	2	CYP1A1,GSTA1
GO:BP	endothelial cell activation	GO:0042118	0.0435102	1	CXCL10
GO:BP	nucleotide metabolic process	GO:0009117	0.0440652	2	GLYAT,IDO1
GO:BP	histone phosphorylation	GO:0016572	0.0440652	3	CDK1,AURKA,CCNB1
GO:BP	branching involved in blood vessel morphogenesis	GO:0001569	0.0440652	4	SFRP2,MDK,EDN1,ACVR1
GO:BP	positive regulation of isomerase activity	GO:0010912	0.0440652	2	NOD2,PLSCR1
GO:BP	cell surface bile acid receptor signaling pathway	GO:0038184	0.0440652	1	GPBAR1
GO:BP	regulation of isomerase activity	GO:0010911	0.0440652	2	NOD2,PLSCR1
GO:BP	phospholipid translocation	GO:0045332	0.0444853	4	ABCB1,PLSCR1,ANO3,ATP8B4
GO:BP	homeostatic process	GO:0042592	0.0444853	6	IFI6,ISG15,CXCL10,ABCC8,IFIT1,FFAR4
GO:BP	membrane lipid catabolic process	GO:0046466	0.0447405	4	GM2A,MGST2,ENPP2,HEXB
GO:BP	dynamin family protein polymerization involved in mitochondrial fission	GO:0003374	0.0447405	1	MX1
GO:BP	indole-containing compound metabolic process	GO:0042430	0.0447405	1	IDO1
GO:BP	dynamin family protein polymerization involved in membrane fission	GO:0003373	0.0447405	1	MX1
GO:BP	synaptic vesicle budding from presynaptic endocytic zone membrane	GO:0016185	0.0447405	1	MX1
GO:BP	lateral attachment of mitotic spindle microtubules to kinetochore	GO:0099607	0.0447405	1	CENPE
GO:BP	mitotic nuclear membrane disassembly	GO:0007077	0.0447405	2	CDK1,CCNB1
GO:BP	nucleoside phosphate metabolic process	GO:0006753	0.0451212	2	GLYAT,IDO1
GO:BP	primary alcohol metabolic process	GO:0034308	0.0451212	1	CYP1A1
GO:BP	peptidyl-threonine modification	GO:0018210	0.0453779	3	TTK,CDK1,STOX1
GO:BP	L-ornithine import across plasma membrane	GO:0097640	0.0453779	1	SLC7A3
GO:BP	positive regulation of monocyte chemotaxis	GO:0090026	0.0453779	3	CXCL10,PLA2G7,S100A14
GO:BP	negative regulation of secretion by cell	GO:1903531	0.0453779	3	ABCC8,FFAR4,GHSR
GO:BP	unsaturated fatty acid metabolic process	GO:0033559	0.0455694	2	CYP1A1,GSTA1
GO:BP	regulation of mitochondrial depolarization	GO:0051900	0.0459497	1	IFI6
GO:BP	regulation of stem cell division	GO:2000035	0.046119	2	SFRP2,MLLT3
GO:BP	morphogenesis of a branching structure	GO:0001763	0.0463355	10	WNT6,SFRP2,MDK,NPNT,WNT5A,PML,VDR,EDN1,CELSR1,ACVR1
GO:BP	regulation of biomineral tissue development	GO:0070167	0.0466634	2	ISG15,WNT6
GO:BP	regulation of leukocyte migration	GO:0002685	0.0466634	10	CXCL10,C3AR1,NOD2,MDK,PLA2G7,MMP28,WNT5A,PLVAP,EDN1,S100A14
GO:BP	positive regulation of ubiquitin-protein transferase activity	GO:0051443	0.0467504	2	CDC20,UBE2C
GO:BP	regulation of developmental process	GO:0050793	0.0467763	16	ISG15,CXCL10,ABCC8,FFAR4,WNT6,CENPF,ASPM,IRF7,C3AR1,GHSR,CAMK2B,CDK1,STOX1,CCN4,CDC20,FOXM1
GO:BP	regulation of fibroblast proliferation	GO:0048145	0.0467763	5	FN1,CCNB1,NUPR1,WNT5A,PML
GO:BP	regulation of cilium movement	GO:0003352	0.0467763	4	GAS2L2,TPPP2,CFAP69,BBS2
GO:BP	negative regulation of axon extension involved in axon guidance	GO:0048843	0.046837	3	SEMA3G,WNT5A,SEMA6C
GO:BP	regulation of blood-brain barrier permeability	GO:1905603	0.0469977	1	ABCC8
GO:BP	negative regulation of interleukin-1 production	GO:0032692	0.0471646	2	FFAR4,GHSR
GO:BP	response to fatty acid	GO:0070542	0.0471684	5	PPP5C,CCNB1,EDN1,IRS1,UCP2
GO:BP	hyaluronan metabolic process	GO:0030212	0.0471967	4	HMMR,IL15,HYAL1,HEXB
GO:BP	positive regulation of neutrophil chemotaxis	GO:0090023	0.0472563	3	C3AR1,MDK,EDN1
GO:BP	olefinic compound metabolic process	GO:0120254	0.0472563	2	CYP1A1,GSTA1
GO:BP	negative regulation of angiogenesis	GO:0016525	0.0472563	2	CXCL10,ABCC8
GO:BP	regulation of biomineralization	GO:0110149	0.0475354	2	ISG15,WNT6
GO:BP	regulation of microtubule depolymerization	GO:0031114	0.0475354	2	GAS2L2,CKAP2
GO:BP	positive regulation of apoptotic process involved in development	GO:1904747	0.0477471	2	PML,VDR
GO:BP	retinoid metabolic process	GO:0001523	0.0477471	1	CYP1A1
GO:BP	translesion synthesis	GO:0019985	0.0477471	3	ISG15,PCLAF,UBE2L6
GO:BP	negative regulation of blood vessel morphogenesis	GO:2000181	0.0477997	2	CXCL10,ABCC8
GO:BP	benzene-containing compound metabolic process	GO:0042537	0.0477997	1	IDO1
GO:BP	fibroblast proliferation	GO:0048144	0.0478253	5	FN1,CCNB1,NUPR1,WNT5A,PML
GO:BP	negative regulation of vasculature development	GO:1901343	0.0482099	2	CXCL10,ABCC8
GO:BP	midbody abscission	GO:0061952	0.0487302	2	CEP55,KIF20A
GO:BP	positive regulation of viral genome replication	GO:0045070	0.0489799	2	IFIT1,TOP2A
GO:BP	regulation of cell motility	GO:2000145	0.0492194	33	CXCL10,GAS2L2,ABCC8,C3AR1,CAMK2B,CCN4,FN1,NOD2,SFRP2,ARHGEF39,SORL1,DDX58,MDK,TPPP2,PLA2G7,MMP28,SEMA3G,WNT5A,CFAP69,SEMA6C,DOCK10,PLXNA4,PLVAP,EDN1,ENPP2,TNFAIP6,SYNE2,S100A14,KANK1,GADD45A,BBS2,HYAL1,ACVR1
GO:BP	sulfate transport	GO:0008272	0.0492478	2	SLC13A4,RACGAP1
GO:BP	positive regulation of gene expression	GO:0010628	0.0494581	22	ISG15,ABCC8,WNT6,IRF7,C3AR1,CDK1,STOX1,MELTF,FN1,DHX58,ZBP1,RSAD2,NOD2,IQGAP3,TMEM106A,EIF2AK2,SORL1,CNTN1,BRCA1,DDX58,MDK,IFIH1
GO:BP	diterpenoid metabolic process	GO:0016101	0.049488	1	CYP1A1
GO:BP	negative regulation of meiotic chromosome separation	GO:1905133	0.0496674	1	TTK
GO:BP	negative regulation of metaphase/anaphase transition of meiotic cell cycle	GO:1902103	0.0496674	1	TTK
GO:BP	response to arachidonic acid	GO:1904550	0.0496908	1	PPP5C
GO:BP	mitochondrial depolarization	GO:0051882	0.0499267	1	IFI6
GO:CC	chromosome, centromeric region	GO:0000775	4.98778e-18	24	CENPW,CENPF,TTK,BUB1B,SPC24,CENPE,NDC80,CDCA8,HJURP,KIF2C,CENPA,TOP2A,KNL1,BUB1,NUF2,BIRC5,CENPT,CENPN,MAD2L1,MIS18BP1,KIF22,KNTC1,NEK2,SKA3
GO:CC	kinetochore	GO:0000776	1.34035e-17	22	CENPW,CENPF,TTK,BUB1B,SPC24,CENPE,NDC80,KIF2C,CENPA,KNL1,BUB1,NUF2,BIRC5,CENPT,CENPN,MAD2L1,KIF22,KNTC1,NEK2,SKA3,SGO1,KNSTRN
GO:CC	condensed chromosome, centromeric region	GO:0000779	4.92033e-17	22	CENPW,CENPF,TTK,BUB1B,SPC24,CENPE,NDC80,KIF2C,CENPA,KNL1,BUB1,NUF2,BIRC5,CENPT,CENPN,MAD2L1,KIF22,KNTC1,NEK2,SKA3,SGO1,KNSTRN
GO:CC	spindle	GO:0005819	4.92033e-17	32	KIF4A,CENPF,ASPM,SHCBP1,TTK,BUB1B,CDK1,CENPE,CDC20,CDCA8,KIF2C,CKAP2,AURKA,DLGAP5,NUSAP1,KIF23,BIRC5,KIF20A,RACGAP1,MAD2L1,KIF22,KNTC1,KIFC1,NEK2,KIF15,KIF11,SKA3,CCNB1,PRC1,CKAP2L,SGO1,KNSTRN
GO:CC	condensed chromosome	GO:0000793	1.26765e-15	25	CENPW,CENPF,TTK,BUB1B,SPC24,CENPE,NDC80,KIF2C,CENPA,TOP2A,KNL1,MKI67,BUB1,NUF2,BIRC5,CENPT,CENPN,MAD2L1,KIF22,KNTC1,NEK2,SKA3,BRCA1,SGO1,KNSTRN
GO:CC	chromosomal region	GO:0098687	3.10772e-14	25	CENPW,CENPF,TTK,BUB1B,SPC24,CDK1,CENPE,NDC80,CDCA8,HJURP,KIF2C,CENPA,TOP2A,KNL1,BUB1,NUF2,BIRC5,CENPT,CENPN,MAD2L1,MIS18BP1,KIF22,KNTC1,NEK2,SKA3
GO:CC	microtubule cytoskeleton	GO:0015630	7.5833e-11	42	GAS2L2,MX1,KIF4A,CENPF,ASPM,SHCBP1,TTK,BUB1B,CAMK2B,CDK1,CENPE,STOX1,NDC80,CDC20,CEP55,CDCA8,KIF2C,CKAP2,PCLAF,HMMR,TOP2A,AURKA,DLGAP5,NLRC5,ZNF365,NUSAP1,KIF23,BIRC5,KIF20A,RACGAP1,MAD2L1,KIF22,KNTC1,KIFC1,NEK2,KIF15,KIF11,SKA3,CCNB1,CCNB3,PRC1,CKAP2L
GO:CC	midbody	GO:0030496	2.53482e-09	16	KIF4A,CENPF,ASPM,SHCBP1,CDK1,CENPE,CEP55,CDCA8,ANLN,AURKA,KIF23,BIRC5,KIF20A,RACGAP1,NEK2,PRC1
GO:CC	mitotic spindle	GO:0072686	1.46016e-08	15	ASPM,CDK1,CENPE,AURKA,NUSAP1,KIF23,RACGAP1,MAD2L1,KIF22,KIFC1,KIF11,SKA3,PRC1,CKAP2L,KNSTRN
GO:CC	microtubule	GO:0005874	2.14346e-08	23	GAS2L2,KIF4A,ASPM,CDK1,CENPE,KIF2C,CKAP2,AURKA,NUSAP1,KIF23,BIRC5,KIF20A,RACGAP1,KIF22,KNTC1,KIFC1,NEK2,KIF15,KIF11,SKA3,PRC1,TPPP2,KNSTRN
GO:CC	spindle pole	GO:0000922	2.17844e-08	15	CENPF,ASPM,CDC20,CKAP2,AURKA,DLGAP5,MAD2L1,KNTC1,NEK2,KIF11,CCNB1,PRC1,CKAP2L,SGO1,KNSTRN
GO:CC	external encapsulating structure	GO:0030312	3.01337e-08	31	CCN5,WNT6,FMOD,COL28A1,CCN4,ACAN,VIT,FN1,COL4A6,LRRC17,OLFML2B,ADAMTS6,SFRP2,KAZALD1,LGALS3BP,ITGB4,MDK,CHAD,CILP,NPNT,MMP28,PLSCR1,ATRNL1,WNT5A,ADAMTSL2,COL21A1,SRPX,MGP,COL18A1,ABI3BP,AGRN
GO:CC	extracellular matrix	GO:0031012	3.01337e-08	31	CCN5,WNT6,FMOD,COL28A1,CCN4,ACAN,VIT,FN1,COL4A6,LRRC17,OLFML2B,ADAMTS6,SFRP2,KAZALD1,LGALS3BP,ITGB4,MDK,CHAD,CILP,NPNT,MMP28,PLSCR1,ATRNL1,WNT5A,ADAMTSL2,COL21A1,SRPX,MGP,COL18A1,ABI3BP,AGRN
GO:CC	supramolecular complex	GO:0099080	3.21311e-08	41	GAS2L2,TDRD9,CENPW,KIF4A,CENPF,ASPM,TTK,BUB1B,SPC24,CDK1,CENPE,NDC80,KIF2C,CKAP2,CENPA,AURKA,KNL1,NUSAP1,COL4A6,BUB1,KIF23,NUF2,BIRC5,CENPT,KIF20A,RACGAP1,CENPN,MAD2L1,KIF22,KNTC1,KIFC1,NEK2,KIF15,KIF11,SKA3,PRC1,TPPP2,SGO1,CAPN3,NPNT,KNSTRN
GO:CC	microtubule organizing center	GO:0005815	7.10271e-08	19	GAS2L2,CENPF,ASPM,BUB1B,CAMK2B,CDK1,STOX1,NDC80,CDC20,CEP55,KIF2C,CKAP2,PCLAF,HMMR,TOP2A,AURKA,DLGAP5,NLRC5,ZNF365
GO:CC	spindle microtubule	GO:0005876	5.52101e-07	9	KIF4A,CDK1,CENPE,AURKA,BIRC5,KNTC1,KIF11,SKA3,PRC1
GO:CC	centrosome	GO:0005813	2.24733e-06	24	CENPF,ASPM,CDK1,STOX1,NDC80,CDC20,CEP55,KIF2C,CKAP2,PCLAF,HMMR,AURKA,DLGAP5,NLRC5,ZNF365,KIF23,NEK2,KIF15,SKA3,CCNB1,CCNB3,CKAP2L,SGO1,KNSTRN
GO:CC	collagen-containing extracellular matrix	GO:0062023	4.31994e-06	23	FMOD,COL28A1,ACAN,VIT,FN1,COL4A6,SFRP2,KAZALD1,LGALS3BP,ITGB4,MDK,CILP,NPNT,MMP28,PLSCR1,ATRNL1,WNT5A,COL21A1,SRPX,MGP,COL18A1,ABI3BP,AGRN
GO:CC	kinesin complex	GO:0005871	7.0474e-06	7	KIF2C,KIF23,KIF20A,KIF22,KIFC1,KIF15,KIF11
GO:CC	cytoskeleton	GO:0005856	1.37624e-05	46	GAS2L2,MX1,KIF4A,CENPF,ASPM,SHCBP1,TTK,BUB1B,CAMK2B,CDK1,CENPE,STOX1,NDC80,CDC20,CEP55,CDCA8,KIF2C,CKAP2,PCLAF,ANLN,HMMR,TOP2A,AURKA,DLGAP5,NLRC5,ZNF365,NUSAP1,KIF23,BIRC5,KIF20A,RACGAP1,MAD2L1,NOD2,KIF22,KNTC1,KIFC1,NEK2,KIF15,KIF11,SKA3,CCNB1,CCNB3,PRC1,BMF,DDX58,CKAP2L
GO:CC	Ndc80 complex	GO:0031262	1.72574e-05	3	SPC24,NDC80,NUF2
GO:CC	NMS complex	GO:0031617	1.72574e-05	3	SPC24,NDC80,NUF2
GO:CC	microtubule associated complex	GO:0005875	2.97874e-05	10	CDCA8,KIF2C,AURKA,KIF23,BIRC5,KIF20A,KIF22,KIFC1,KIF15,KIF11
GO:CC	chromosome passenger complex	GO:0032133	9.21818e-05	3	CDCA8,AURKA,BIRC5
GO:CC	polymeric cytoskeletal fiber	GO:0099513	0.000156843	21	GAS2L2,KIF4A,ASPM,CDK1,CENPE,KIF2C,CKAP2,AURKA,NUSAP1,KIF23,BIRC5,KIF20A,RACGAP1,KIF22,KNTC1,KIFC1,NEK2,KIF15,KIF11,SKA3,PRC1
GO:CC	chromosome	GO:0005694	0.000206793	44	CENPW,KIF4A,CENPF,IRF7,TTK,BUB1B,SPC24,CDK1,CENPE,NDC80,FOXM1,CDCA8,HJURP,KIF2C,CENPA,TOP2A,NEIL3,KNL1,MKI67,NUSAP1,BUB1,NUF2,BIRC5,CENPT,CENPN,MAD2L1,MIS18BP1,KIF22,KNTC1,NEK2,PRRX1,SKA3,BRCA1,PRC1,MLLT3,SGO1,KNSTRN,DLX4,BHLHE41,DBP,STAT1,NPAS3,SMC2,PML
GO:CC	spindle midzone	GO:0051233	0.000338728	5	CENPE,CDCA8,AURKA,RACGAP1,PRC1
GO:CC	basement membrane	GO:0005604	0.000338728	9	COL28A1,ACAN,FN1,COL4A6,ITGB4,NPNT,ATRNL1,COL18A1,AGRN
GO:CC	supramolecular polymer	GO:0099081	0.00064459	26	GAS2L2,KIF4A,ASPM,CDK1,CENPE,KIF2C,CKAP2,AURKA,NUSAP1,COL4A6,KIF23,BIRC5,KIF20A,RACGAP1,KIF22,KNTC1,KIFC1,NEK2,KIF15,KIF11,SKA3,PRC1,TPPP2,CAPN3,NPNT,KNSTRN
GO:CC	anaphase-promoting complex	GO:0005680	0.000999737	3	BUB1B,CDC20,UBE2C
GO:CC	outer kinetochore	GO:0000940	0.0012131	3	CENPF,BUB1B,SKA3
GO:CC	cyclin B1-CDK1 complex	GO:0097125	0.00124305	2	CDK1,CCNB1
GO:CC	supramolecular fiber	GO:0099512	0.00133341	25	GAS2L2,KIF4A,ASPM,CDK1,CENPE,KIF2C,CKAP2,AURKA,NUSAP1,KIF23,BIRC5,KIF20A,RACGAP1,KIF22,KNTC1,KIFC1,NEK2,KIF15,KIF11,SKA3,PRC1,TPPP2,CAPN3,NPNT,KNSTRN
GO:CC	intercellular bridge	GO:0045171	0.0016834	6	CEP55,CDCA8,KIF23,KIF20A,PRC1,NUPR1
GO:CC	centralspindlin complex	GO:0097149	0.00195942	2	KIF23,RACGAP1
GO:CC	microtubule end	GO:1990752	0.00265515	3	GAS2L2,ASPM,KIF2C
GO:CC	cytosol	GO:0005829	0.00340737	72	ASPG,IDO1,ISG15,MX1,HERC6,IFIT1,GSTA1,THRSP,KIF4A,IFIT3,CENPF,XAF1,IRF7,BUB1B,CAMK2B,SPC24,CDK1,CENPE,STOX1,NDC80,CCN4,CDC20,CDCA8,UBE2C,KIF2C,CKAP2,HMMR,CENPA,AURKA,DLGAP5,RNF213,NLRC5,KNL1,ZBP1,BUB1,CDCA3,KIF23,NUF2,PITPNM3,CDKN3,PPP5C,BIRC5,CENPT,RACGAP1,CDKN2C,CENPN,AOX1,MAD2L1,RRM2,NOD2,KIF22,ARHGAP11A,UCHL1,IQGAP3,KNTC1,NT5C,NEK2,KIF15,PARP14,ASB9,CIITA,UBE2L6,KIF11,EIF2AK2,PRRX1,SKA3,CCNB1…
GO:CC	nuclear ubiquitin ligase complex	GO:0000152	0.00527813	3	BUB1B,CDC20,UBE2C
GO:CC	lysosomal lumen	GO:0043202	0.00528552	8	FMOD,ACAN,LIPA,GM2A,AGRN,SGSH,HYAL1,HEXB
GO:CC	intracellular non-membrane-bounded organelle	GO:0043232	0.00632995	69	ISG15,GAS2L2,MX1,TDRD9,CENPW,KIF4A,CENPF,ASPM,SHCBP1,IRF7,TTK,BUB1B,CAMK2B,SPC24,CDK1,CENPE,STOX1,NDC80,CDC20,CEP55,FOXM1,CDCA8,HJURP,KIF2C,CKAP2,PCLAF,ANLN,HMMR,CENPA,TOP2A,AURKA,DLGAP5,NEIL3,RNF213,NLRC5,ZNF365,KNL1,MKI67,NUSAP1,RSAD2,BUB1,KIF23,NUF2,BIRC5,CENPT,KIF20A,RACGAP1,CENPN,MAD2L1,MIS18BP1,NOD2,KIF22,KNTC1,KIFC1,NEK2,KIF15,KIF11,EIF2AK2,PRRX1,SKA3,CCNB1,BRCA1,CCNB3,PRC1,BMF,DDX58,CKAP2…
GO:CC	non-membrane-bounded organelle	GO:0043228	0.0064197	69	ISG15,GAS2L2,MX1,TDRD9,CENPW,KIF4A,CENPF,ASPM,SHCBP1,IRF7,TTK,BUB1B,CAMK2B,SPC24,CDK1,CENPE,STOX1,NDC80,CDC20,CEP55,FOXM1,CDCA8,HJURP,KIF2C,CKAP2,PCLAF,ANLN,HMMR,CENPA,TOP2A,AURKA,DLGAP5,NEIL3,RNF213,NLRC5,ZNF365,KNL1,MKI67,NUSAP1,RSAD2,BUB1,KIF23,NUF2,BIRC5,CENPT,KIF20A,RACGAP1,CENPN,MAD2L1,MIS18BP1,NOD2,KIF22,KNTC1,KIFC1,NEK2,KIF15,KIF11,EIF2AK2,PRRX1,SKA3,CCNB1,BRCA1,CCNB3,PRC1,BMF,DDX58,CKAP2…
GO:CC	interstitial matrix	GO:0005614	0.0064197	3	VIT,KAZALD1,ABI3BP
GO:CC	nuclear matrix	GO:0016363	0.00729024	3	CENPW,KIF4A,CENPF
GO:CC	anchored component of membrane	GO:0031225	0.00729024	8	DPEP3,DPEP2,MELTF,LYPD1,XPNPEP2,NOD2,CNTN1,RGS7BP
GO:CC	cyclin-dependent protein kinase holoenzyme complex	GO:0000307	0.008671	4	CDK1,CCNB1,CCNB3,CKS2
GO:CC	nuclear periphery	GO:0034399	0.0118354	3	CENPW,KIF4A,CENPF
GO:CC	kinetochore microtubule	GO:0005828	0.0123005	2	CENPE,KNTC1
GO:CC	cytoplasm	GO:0005737	0.0123005	60	CYP1A1,GLYAT,ASPG,IDO1,IFI6,ISG15,GAS2L2,GALNT5,DPEP3,MX1,ABCC8,HERC6,IFIT1,FFAR4,GSTA1,TDRD9,THRSP,WNT6,FMOD,KIF4A,IFIT3,CENPF,XAF1,ASPM,SLC22A18,SHCBP1,IRF7,C3AR1,TTK,BUB1B,MS4A7,COL28A1,CAMK2B,SPC24,CDK1,CENPE,GABBR2,STOX1,NDC80,CCN4,ACAN,CDC20,CEP55,CDCA8,IFI44L,UBE2C,HJURP,KIF2C,CKAP2,PCLAF,GBP6,ACKR4,ANLN,HMMR,CENPA,TOP2A,AURKA,MELTF,IFI44,ACSS3
GO:CC	Flemming body	GO:0090543	0.0126857	4	CEP55,KIF23,RACGAP1,CAPG
GO:CC	organelle lumen	GO:0043233	0.0128935	129	GLYAT,ISG15,HERC6,THRSP,WNT6,CENPW,FMOD,KIF4A,CENPF,XAF1,IRF7,COL28A1,CAMK2B,SPC24,CDK1,CENPE,STOX1,NDC80,ACAN,CDC20,FOXM1,CDCA8,UBE2C,HJURP,PCLAF,LMO1,ANLN,CENPA,TOP2A,AURKA,MELTF,ACSS3,NEIL3,RNF213,KNL1,MKI67,FN1,NUSAP1,RSAD2,COL4A6,BUB1,KIF23,ABCB1,NUF2,PPP5C,BIRC5,CENPT,KIF20A,RACGAP1,CENPN,MAD2L1,GATM,MIS18BP1,KIF22,UCHL1,SP110,NEK2,SARDH,CIITA,UBE2L6,PRRX1,SORL1,CCNB1,CLSPN,BRCA1,CCNB3,LGAL…
GO:CC	membrane-enclosed lumen	GO:0031974	0.0128935	129	GLYAT,ISG15,HERC6,THRSP,WNT6,CENPW,FMOD,KIF4A,CENPF,XAF1,IRF7,COL28A1,CAMK2B,SPC24,CDK1,CENPE,STOX1,NDC80,ACAN,CDC20,FOXM1,CDCA8,UBE2C,HJURP,PCLAF,LMO1,ANLN,CENPA,TOP2A,AURKA,MELTF,ACSS3,NEIL3,RNF213,KNL1,MKI67,FN1,NUSAP1,RSAD2,COL4A6,BUB1,KIF23,ABCB1,NUF2,PPP5C,BIRC5,CENPT,KIF20A,RACGAP1,CENPN,MAD2L1,GATM,MIS18BP1,KIF22,UCHL1,SP110,NEK2,SARDH,CIITA,UBE2L6,PRRX1,SORL1,CCNB1,CLSPN,BRCA1,CCNB3,LGAL…
GO:CC	intracellular organelle lumen	GO:0070013	0.0128935	129	GLYAT,ISG15,HERC6,THRSP,WNT6,CENPW,FMOD,KIF4A,CENPF,XAF1,IRF7,COL28A1,CAMK2B,SPC24,CDK1,CENPE,STOX1,NDC80,ACAN,CDC20,FOXM1,CDCA8,UBE2C,HJURP,PCLAF,LMO1,ANLN,CENPA,TOP2A,AURKA,MELTF,ACSS3,NEIL3,RNF213,KNL1,MKI67,FN1,NUSAP1,RSAD2,COL4A6,BUB1,KIF23,ABCB1,NUF2,PPP5C,BIRC5,CENPT,KIF20A,RACGAP1,CENPN,MAD2L1,GATM,MIS18BP1,KIF22,UCHL1,SP110,NEK2,SARDH,CIITA,UBE2L6,PRRX1,SORL1,CCNB1,CLSPN,BRCA1,CCNB3,LGAL…
GO:CC	pronucleus	GO:0045120	0.0128935	2	CENPF,AURKA
GO:CC	cell periphery	GO:0071944	0.0129529	97	IFI6,CXCL10,GAS2L2,DPEP3,MX1,ABCC8,FFAR4,CCN5,WNT6,FCGR3A,FMOD,SLC47A2,ASPM,RHBDL1,SLC22A18,C3AR1,GHSR,COL28A1,GABBR2,STOX1,CFB,CCN4,ACAN,CEP55,UBE2C,ACKR4,ANLN,HMMR,MELTF,VIT,FN1,TNFRSF19,GPBAR1,COL4A6,LRRC17,TNFSF10,SLC7A3,CATSPER4,ABCB1,LYPD1,PPP5C,XPNPEP2,SLC13A4,OLFML2B,SUSD2,SIGLEC1,ADAMTS6,ROBO2,KIF20A,RACGAP1,NOXO1,NOD2,UCHL1,IQGAP3,CA11,KNTC1,TMEM106A,RASL10B,SCN7A,SFRP2,F2RL2,ARHGEF39,K…
GO:CC	cell division site	GO:0032153	0.0130256	4	CEP55,ANLN,KIF20A,RACGAP1
GO:CC	meiotic spindle	GO:0072687	0.0133203	2	ASPM,AURKA
GO:CC	anchored component of postsynaptic membrane	GO:0099025	0.0156429	2	CNTN1,RGS7BP
GO:CC	spindle pole centrosome	GO:0031616	0.0167435	2	AURKA,DLGAP5
GO:CC	external side of apical plasma membrane	GO:0098591	0.017675	2	ABCB1,ABCG2
GO:CC	potassium ion-transporting ATPase complex	GO:0031004	0.017675	1	ABCC8
GO:CC	microtubule plus-end	GO:0035371	0.018277	3	GAS2L2,KIF2C,KNSTRN
GO:CC	extracellular exosome	GO:0070062	0.0215788	58	GSTA1,WNT6,FCGR3A,CDK1,CFB,GBP6,MELTF,FN1,TNFSF10,ABCB1,PTER,XPNPEP2,SUSD2,ROBO2,RACGAP1,AOX1,GATM,NT5C,SORL1,CNTN1,ALDH1L1,LGALS3BP,ITGB4,MLLT3,MXRA8,CILP,NPNT,PTGR1,PLSCR1,SEMA3G,WNT5A,SMC2,MGP,CPQ,ACAT2,CAPG,SLC46A3,DOCK10,GALM,COL18A1,SHBG,GM2A,PLVAP,STMN1,AGRN,MVP,ADGRE5,QDPR,PRXL2B,SGSH,SH3BGRL,SAT2,SYNE2,S100A14,RAB13,HYAL1,HEXB,TM7SF3
GO:CC	inward rectifying potassium channel	GO:0008282	0.0224373	1	ABCC8
GO:CC	Golgi lumen	GO:0005796	0.02388	3	WNT6,FMOD,ACAN
GO:CC	extracellular region	GO:0005576	0.02388	107	ISG15,CXCL10,PRSS35,GSTA1,CCN5,WNT6,FCGR3A,FMOD,COL28A1,CDK1,CFB,CCN4,ACAN,CEP55,CDCA8,GBP6,MELTF,VIT,FN1,COL4A6,LRRC17,TNFSF10,NPTX2,KIF23,ABCB1,PTER,LYPD1,XPNPEP2,OLFML2B,SUSD2,SIGLEC1,ADAMTS6,ROBO2,KIF20A,RACGAP1,AOX1,GATM,CA11,SFRP2,F2RL2,NT5C,KAZALD1,SORL1,CNTN1,ALDH1L1,LGALS3BP,PRC1,ITGB4,MDK,MLLT3,NUPR1,MXRA8,TLL1,TST,CHAD,CILP,NPNT,PTGR1,PLA2G7,MMP28,PLXDC1,GASK1A,PLSCR1,DKK2,SEMA3G,WNT5A…
GO:CC	postsynaptic endocytic zone membrane	GO:0098844	0.0243384	1	MX1
GO:CC	nuclear lumen	GO:0031981	0.0243384	64	ISG15,HERC6,THRSP,CENPW,KIF4A,CENPF,XAF1,IRF7,CAMK2B,SPC24,CDK1,CENPE,STOX1,NDC80,CDC20,FOXM1,CDCA8,UBE2C,HJURP,PCLAF,LMO1,ANLN,CENPA,TOP2A,AURKA,NEIL3,RNF213,KNL1,MKI67,NUSAP1,RSAD2,BUB1,KIF23,ABCB1,NUF2,PPP5C,BIRC5,CENPT,KIF20A,RACGAP1,CENPN,MAD2L1,MIS18BP1,KIF22,UCHL1,SP110,NEK2,CIITA,UBE2L6,PRRX1,SORL1,CCNB1,CLSPN,BRCA1,CCNB3,PRC1,ITGB4,RETREG1,RAD54L,MLLT3,NUPR1,BAALC,SGO1,CMPK2
GO:CC	protein kinase complex	GO:1902911	0.0251386	7	CDK1,CCNB1,CCNB3,CKS2,IFIT5,IRS1,ACVR1
GO:CC	contractile ring	GO:0070938	0.0268381	2	ANLN,PRC1
GO:CC	DNA topoisomerase type II (double strand cut, ATP-hydrolyzing) complex	GO:0009330	0.0275272	1	TOP2A
GO:CC	mitochondrion	GO:0005739	0.0275272	5	CYP1A1,GLYAT,IFI6,MX1,ABCC8
GO:CC	anchored component of presynaptic membrane	GO:0099026	0.0290862	2	CNTN1,RGS7BP
GO:CC	nucleoplasm	GO:0005654	0.0297394	69	ISG15,HERC6,THRSP,CENPW,KIF4A,CENPF,XAF1,IRF7,CAMK2B,SPC24,CDK1,CENPE,STOX1,NDC80,CDC20,FOXM1,CDCA8,UBE2C,HJURP,PCLAF,LMO1,ANLN,CENPA,TOP2A,AURKA,NEIL3,KNL1,MKI67,BUB1,KIF23,ABCB1,NUF2,PPP5C,BIRC5,CENPT,KIF20A,RACGAP1,CENPN,MAD2L1,MIS18BP1,KIF22,UCHL1,SP110,NEK2,CIITA,UBE2L6,PRRX1,CCNB1,CLSPN,BRCA1,CCNB3,PRC1,RETREG1,RAD54L,MLLT3,NUPR1,BAALC,SGO1,CMPK2,DLX4,RDM1,PLSCR1,SLC2A4RG,LIPA,STAT1,MGMT,NP…
GO:CC	piP-body	GO:0071547	0.0330333	1	TDRD9
GO:CC	anchored component of plasma membrane	GO:0046658	0.0341925	4	MELTF,NOD2,CNTN1,RGS7BP
GO:CC	acrosomal vesicle	GO:0001669	0.0348341	5	DPEP3,KNL1,CATSPER4,RACGAP1,BMF
GO:CC	cleavage furrow	GO:0032154	0.0380138	3	CEP55,KIF20A,RACGAP1
GO:CC	serine/threonine protein kinase complex	GO:1902554	0.0383741	6	CDK1,CCNB1,CCNB3,CKS2,IFIT5,ACVR1
GO:CC	extracellular organelle	GO:0043230	0.0383741	58	GSTA1,WNT6,FCGR3A,CDK1,CFB,GBP6,MELTF,FN1,TNFSF10,ABCB1,PTER,XPNPEP2,SUSD2,ROBO2,RACGAP1,AOX1,GATM,NT5C,SORL1,CNTN1,ALDH1L1,LGALS3BP,ITGB4,MLLT3,MXRA8,CILP,NPNT,PTGR1,PLSCR1,SEMA3G,WNT5A,SMC2,MGP,CPQ,ACAT2,CAPG,SLC46A3,DOCK10,GALM,COL18A1,SHBG,GM2A,PLVAP,STMN1,AGRN,MVP,ADGRE5,QDPR,PRXL2B,SGSH,SH3BGRL,SAT2,SYNE2,S100A14,RAB13,HYAL1,HEXB,TM7SF3
GO:CC	extracellular vesicle	GO:1903561	0.0383741	58	GSTA1,WNT6,FCGR3A,CDK1,CFB,GBP6,MELTF,FN1,TNFSF10,ABCB1,PTER,XPNPEP2,SUSD2,ROBO2,RACGAP1,AOX1,GATM,NT5C,SORL1,CNTN1,ALDH1L1,LGALS3BP,ITGB4,MLLT3,MXRA8,CILP,NPNT,PTGR1,PLSCR1,SEMA3G,WNT5A,SMC2,MGP,CPQ,ACAT2,CAPG,SLC46A3,DOCK10,GALM,COL18A1,SHBG,GM2A,PLVAP,STMN1,AGRN,MVP,ADGRE5,QDPR,PRXL2B,SGSH,SH3BGRL,SAT2,SYNE2,S100A14,RAB13,HYAL1,HEXB,TM7SF3
GO:CC	extracellular membrane-bounded organelle	GO:0065010	0.0383741	58	GSTA1,WNT6,FCGR3A,CDK1,CFB,GBP6,MELTF,FN1,TNFSF10,ABCB1,PTER,XPNPEP2,SUSD2,ROBO2,RACGAP1,AOX1,GATM,NT5C,SORL1,CNTN1,ALDH1L1,LGALS3BP,ITGB4,MLLT3,MXRA8,CILP,NPNT,PTGR1,PLSCR1,SEMA3G,WNT5A,SMC2,MGP,CPQ,ACAT2,CAPG,SLC46A3,DOCK10,GALM,COL18A1,SHBG,GM2A,PLVAP,STMN1,AGRN,MVP,ADGRE5,QDPR,PRXL2B,SGSH,SH3BGRL,SAT2,SYNE2,S100A14,RAB13,HYAL1,HEXB,TM7SF3
GO:CC	postsynaptic endocytic zone	GO:0098843	0.0392364	1	MX1
GO:CC	NADPH oxidase complex	GO:0043020	0.0392364	2	NOXO1,NCF4
GO:CC	mitochondrial inner membrane	GO:0005743	0.0407398	2	CYP1A1,IFI6
GO:CC	mitotic spindle midzone	GO:1990023	0.0425076	2	CENPE,PRC1
GO:CC	endoplasmic reticulum lumen	GO:0005788	0.0425076	11	WNT6,COL28A1,MELTF,FN1,COL4A6,MXRA8,CERCAM,WNT5A,COL21A1,COL18A1,EDN1
GO:CC	dendritic spine head	GO:0044327	0.0448929	1	MX1
GO:CC	G protein-coupled receptor heterodimeric complex	GO:0038039	0.0453372	1	GABBR2
GO:CC	mitotic spindle pole	GO:0097431	0.0476894	2	ASPM,AURKA
GO:CC	organelle inner membrane	GO:0019866	0.0476894	2	CYP1A1,IFI6
KEGG	Tryptophan metabolism	KEGG:00380	0.0343735	2	CYP1A1,IDO1
REAC	Amplification of signal from the kinetochores	REAC:R-HSA-141424	8.95181e-13	17	CENPF,BUB1B,SPC24,CENPE,NDC80,CDC20,CDCA8,KIF2C,CENPA,KNL1,BUB1,NUF2,BIRC5,CENPT,CENPN,MAD2L1,KNTC1
REAC	Mitotic Spindle Checkpoint	REAC:R-HSA-69618	8.95181e-13	18	CENPF,BUB1B,SPC24,CENPE,NDC80,CDC20,CDCA8,UBE2C,KIF2C,CENPA,KNL1,BUB1,NUF2,BIRC5,CENPT,CENPN,MAD2L1,KNTC1
REAC	Amplification of signal from unattached kinetochores via a MAD2 inhibitory signal	REAC:R-HSA-141444	8.95181e-13	17	CENPF,BUB1B,SPC24,CENPE,NDC80,CDC20,CDCA8,KIF2C,CENPA,KNL1,BUB1,NUF2,BIRC5,CENPT,CENPN,MAD2L1,KNTC1
REAC	Resolution of Sister Chromatid Cohesion	REAC:R-HSA-2500257	6.03633e-12	18	CENPF,BUB1B,SPC24,CDK1,CENPE,NDC80,CDC20,CDCA8,KIF2C,CENPA,KNL1,BUB1,NUF2,BIRC5,CENPT,CENPN,MAD2L1,KNTC1
REAC	EML4 and NUDC in mitotic spindle formation	REAC:R-HSA-9648025	2.19223e-11	17	CENPF,BUB1B,SPC24,CENPE,NDC80,CDC20,CDCA8,KIF2C,CENPA,KNL1,BUB1,NUF2,BIRC5,CENPT,CENPN,MAD2L1,KNTC1
REAC	RHO GTPases Activate Formins	REAC:R-HSA-5663220	3.0508e-10	17	CENPF,BUB1B,SPC24,CENPE,NDC80,CDC20,CDCA8,KIF2C,CENPA,KNL1,BUB1,NUF2,BIRC5,CENPT,CENPN,MAD2L1,KNTC1
REAC	Mitotic Prometaphase	REAC:R-HSA-68877	3.65267e-09	20	CENPF,BUB1B,SPC24,CDK1,CENPE,NDC80,CDC20,CDCA8,KIF2C,CENPA,KNL1,BUB1,NUF2,BIRC5,CENPT,CENPN,MAD2L1,KNTC1,NEK2,CCNB1
REAC	Separation of Sister Chromatids	REAC:R-HSA-2467813	4.81146e-09	18	CENPF,BUB1B,SPC24,CENPE,NDC80,CDC20,CDCA8,UBE2C,KIF2C,CENPA,KNL1,BUB1,NUF2,BIRC5,CENPT,CENPN,MAD2L1,KNTC1
REAC	Mitotic Metaphase and Anaphase	REAC:R-HSA-2555396	1.31081e-08	19	CENPF,BUB1B,SPC24,CDK1,CENPE,NDC80,CDC20,CDCA8,UBE2C,KIF2C,CENPA,KNL1,BUB1,NUF2,BIRC5,CENPT,CENPN,MAD2L1,KNTC1
REAC	Mitotic Anaphase	REAC:R-HSA-68882	1.31081e-08	19	CENPF,BUB1B,SPC24,CDK1,CENPE,NDC80,CDC20,CDCA8,UBE2C,KIF2C,CENPA,KNL1,BUB1,NUF2,BIRC5,CENPT,CENPN,MAD2L1,KNTC1
REAC	Cell Cycle Checkpoints	REAC:R-HSA-69620	7.00349e-08	22	CENPF,BUB1B,SPC24,CDK1,CENPE,NDC80,CDC20,CDCA8,UBE2C,KIF2C,CENPA,KNL1,BUB1,NUF2,BIRC5,CENPT,CENPN,MAD2L1,KNTC1,CCNB1,CLSPN,BRCA1
REAC	Cell Cycle	REAC:R-HSA-1640170	9.52222e-08	34	CENPW,CENPF,BUB1B,SPC24,CDK1,CENPE,NDC80,CDC20,FOXM1,CDCA8,UBE2C,HJURP,KIF2C,HMMR,CENPA,TOP2A,AURKA,KNL1,BUB1,KIF23,NUF2,BIRC5,CENPT,KIF20A,CDKN2C,CENPN,MAD2L1,MIS18BP1,RRM2,KNTC1,NEK2,CCNB1,CLSPN,BRCA1
REAC	Interferon alpha/beta signaling	REAC:R-HSA-909733	1.04646e-07	7	IFI6,ISG15,MX1,IFIT1,IFIT3,XAF1,IRF7
REAC	Cell Cycle, Mitotic	REAC:R-HSA-69278	1.4635e-07	28	CENPF,BUB1B,SPC24,CDK1,CENPE,NDC80,CDC20,FOXM1,CDCA8,UBE2C,KIF2C,HMMR,CENPA,TOP2A,AURKA,KNL1,BUB1,KIF23,NUF2,BIRC5,CENPT,KIF20A,CDKN2C,CENPN,MAD2L1,RRM2,KNTC1,NEK2
REAC	Kinesins	REAC:R-HSA-983189	1.02332e-06	10	KIF4A,CENPE,KIF2C,KIF23,KIF20A,RACGAP1,KIF22,KIFC1,KIF15,KIF11
REAC	RHO GTPase Effectors	REAC:R-HSA-195258	2.01827e-06	19	CENPF,BUB1B,SPC24,CENPE,NDC80,CDC20,CDCA8,KIF2C,CENPA,KNL1,BUB1,NUF2,BIRC5,CENPT,CENPN,MAD2L1,NOXO1,IQGAP3,KNTC1
REAC	M Phase	REAC:R-HSA-68886	2.68758e-06	22	CENPF,BUB1B,SPC24,CDK1,CENPE,NDC80,CDC20,CDCA8,UBE2C,KIF2C,CENPA,KNL1,BUB1,KIF23,NUF2,BIRC5,CENPT,KIF20A,CENPN,MAD2L1,KNTC1,NEK2
REAC	Signaling by Rho GTPases, Miro GTPases and RHOBTB3	REAC:R-HSA-9716542	2.177e-05	22	CENPF,BUB1B,SPC24,CENPE,NDC80,CDC20,CDCA8,KIF2C,CENPA,KNL1,BUB1,NUF2,BIRC5,CENPT,RACGAP1,CENPN,MAD2L1,NOXO1,ARHGAP11A,IQGAP3,KNTC1,ARHGEF39
REAC	Signaling by Rho GTPases	REAC:R-HSA-194315	2.177e-05	22	CENPF,BUB1B,SPC24,CENPE,NDC80,CDC20,CDCA8,KIF2C,CENPA,KNL1,BUB1,NUF2,BIRC5,CENPT,RACGAP1,CENPN,MAD2L1,NOXO1,ARHGAP11A,IQGAP3,KNTC1,ARHGEF39
REAC	Interferon Signaling	REAC:R-HSA-913531	4.52074e-05	8	IFI6,ISG15,MX1,IFIT1,IFIT3,XAF1,IRF7,CAMK2B
REAC	COPI-dependent Golgi-to-ER retrograde traffic	REAC:R-HSA-6811434	8.48232e-05	10	KIF4A,CENPE,KIF2C,KIF23,KIF20A,RACGAP1,KIF22,KIFC1,KIF15,KIF11
REAC	APC-Cdc20 mediated degradation of Nek2A	REAC:R-HSA-179409	0.000926771	5	BUB1B,CDC20,UBE2C,MAD2L1,NEK2
REAC	Nucleosome assembly	REAC:R-HSA-774815	0.000980158	7	CENPW,HJURP,CENPA,KNL1,CENPT,CENPN,MIS18BP1
REAC	Golgi-to-ER retrograde transport	REAC:R-HSA-8856688	0.000980158	10	KIF4A,CENPE,KIF2C,KIF23,KIF20A,RACGAP1,KIF22,KIFC1,KIF15,KIF11
REAC	Deposition of new CENPA-containing nucleosomes at the centromere	REAC:R-HSA-606279	0.000980158	7	CENPW,HJURP,CENPA,KNL1,CENPT,CENPN,MIS18BP1
REAC	Regulation of mitotic cell cycle	REAC:R-HSA-453276	0.00187479	8	BUB1B,CDK1,CDC20,UBE2C,AURKA,MAD2L1,NEK2,CCNB1
REAC	APC/C-mediated degradation of cell cycle proteins	REAC:R-HSA-174143	0.00187479	8	BUB1B,CDK1,CDC20,UBE2C,AURKA,MAD2L1,NEK2,CCNB1
REAC	Phosphorylation of Emi1	REAC:R-HSA-176417	0.00191184	3	CDK1,CDC20,CCNB1
REAC	MHC class II antigen presentation	REAC:R-HSA-2132295	0.00242661	9	KIF4A,CENPE,KIF2C,KIF23,KIF20A,RACGAP1,KIF22,KIF15,KIF11
REAC	Inhibition of the proteolytic activity of APC/C required for the onset of anaphase by mitotic spindle checkpoint components	REAC:R-HSA-141405	0.00263194	4	BUB1B,CDC20,UBE2C,MAD2L1
REAC	Inactivation of APC/C via direct inhibition of the APC/C complex	REAC:R-HSA-141430	0.00263194	4	BUB1B,CDC20,UBE2C,MAD2L1
REAC	ISG15 antiviral mechanism	REAC:R-HSA-1169408	0.00267344	3	ISG15,MX1,IFIT1
REAC	Antiviral mechanism by IFN-stimulated genes	REAC:R-HSA-1169410	0.00357849	3	ISG15,MX1,IFIT1
REAC	APC/C:Cdc20 mediated degradation of mitotic proteins	REAC:R-HSA-176409	0.00392935	7	BUB1B,CDK1,CDC20,UBE2C,MAD2L1,NEK2,CCNB1
REAC	Activation of APC/C and APC/C:Cdc20 mediated degradation of mitotic proteins	REAC:R-HSA-176814	0.00414398	7	BUB1B,CDK1,CDC20,UBE2C,MAD2L1,NEK2,CCNB1
REAC	Factors involved in megakaryocyte development and platelet production	REAC:R-HSA-983231	0.00481185	10	KIF4A,CENPE,KIF2C,KIF23,KIF20A,RACGAP1,KIF22,KIFC1,KIF15,KIF11
REAC	LTC4-CYSLTR mediated IL4 production	REAC:R-HSA-9664535	0.00481185	2	DPEP3,DPEP2
REAC	Negative regulators of DDX58/IFIH1 signaling	REAC:R-HSA-936440	0.00549113	5	ISG15,NLRC5,UBE2L6,DDX58,IFIH1
REAC	APC/C:Cdc20 mediated degradation of Cyclin B	REAC:R-HSA-174048	0.00593335	3	CDK1,CDC20,UBE2C
REAC	Biological oxidations	REAC:R-HSA-211859	0.00604297	4	CYP1A1,GLYAT,DPEP3,GSTA1
REAC	Biosynthesis of protectins	REAC:R-HSA-9018681	0.00666817	1	CYP1A1
REAC	DDX58/IFIH1-mediated induction of interferon-alpha/beta	REAC:R-HSA-168928	0.00721773	7	ISG15,IRF7,NLRC5,DHX58,UBE2L6,DDX58,IFIH1
REAC	APC:Cdc20 mediated degradation of cell cycle proteins prior to satisfation of the cell cycle checkpoint	REAC:R-HSA-179419	0.0105464	6	BUB1B,CDK1,CDC20,UBE2C,MAD2L1,NEK2
REAC	Defective B4GALT1 causes B4GALT1-CDG (CDG-2d)	REAC:R-HSA-3656244	0.0109931	2	FMOD,ACAN
REAC	Defective CHST6 causes MCDC1	REAC:R-HSA-3656225	0.0109931	2	FMOD,ACAN
REAC	Defective ST3GAL3 causes MCT12 and EIEE15	REAC:R-HSA-3656243	0.0109931	2	FMOD,ACAN
REAC	Cdc20:Phospho-APC/C mediated degradation of Cyclin A	REAC:R-HSA-174184	0.0113915	4	BUB1B,CDK1,CDC20,UBE2C
REAC	Synthesis of epoxy (EET) and dihydroxyeicosatrienoic acids (DHET)	REAC:R-HSA-2142670	0.0113915	1	CYP1A1
REAC	Synthesis of (16-20)-hydroxyeicosatetraenoic acids (HETE)	REAC:R-HSA-2142816	0.0125538	1	CYP1A1
REAC	Intra-Golgi and retrograde Golgi-to-ER traffic	REAC:R-HSA-6811442	0.0143132	10	KIF4A,CENPE,KIF2C,KIF23,KIF20A,RACGAP1,KIF22,KIFC1,KIF15,KIF11
REAC	Arachidonic acid metabolism	REAC:R-HSA-2142753	0.0154494	3	CYP1A1,DPEP3,DPEP2
REAC	Regulation of APC/C activators between G1/S and early anaphase	REAC:R-HSA-176408	0.0154494	4	BUB1B,CDK1,CDC20,UBE2C
REAC	Conjugation of benzoate with glycine	REAC:R-HSA-177135	0.0154715	1	GLYAT
REAC	SUMOylation of DNA replication proteins	REAC:R-HSA-4615885	0.0156219	4	CDCA8,TOP2A,AURKA,BIRC5
REAC	Metabolism	REAC:R-HSA-1430728	0.0191856	4	CYP1A1,GLYAT,ASPG,IDO1
REAC	Biosynthesis of DHA-derived SPMs	REAC:R-HSA-9018677	0.0191856	1	CYP1A1
REAC	Conjugation of salicylate with glycine	REAC:R-HSA-177128	0.0191856	1	GLYAT
REAC	Condensation of Prometaphase Chromosomes	REAC:R-HSA-2514853	0.0193979	3	CDK1,CCNB1,SMC2
REAC	Cytokine Signaling in Immune system	REAC:R-HSA-1280215	0.0193979	8	IFI6,ISG15,CXCL10,MX1,IFIT1,IFIT3,XAF1,IRF7
REAC	Conjugation of carboxylic acids	REAC:R-HSA-159424	0.0195282	1	GLYAT
REAC	Biosynthesis of specialized proresolving mediators (SPMs)	REAC:R-HSA-9018678	0.0195282	1	CYP1A1
REAC	TRAF3-dependent IRF activation pathway	REAC:R-HSA-918233	0.0195282	3	IRF7,DDX58,IFIH1
REAC	Amino Acid conjugation	REAC:R-HSA-156587	0.0195282	1	GLYAT
REAC	Aflatoxin activation and detoxification	REAC:R-HSA-5423646	0.0197843	2	DPEP3,DPEP2
REAC	Chromosome Maintenance	REAC:R-HSA-73886	0.0199574	7	CENPW,HJURP,CENPA,KNL1,CENPT,CENPN,MIS18BP1
REAC	Polo-like kinase mediated events	REAC:R-HSA-156711	0.0202255	3	CENPF,FOXM1,CCNB1
REAC	Keratan sulfate degradation	REAC:R-HSA-2022857	0.0206853	2	FMOD,ACAN
REAC	TP53 Regulates Transcription of Genes Involved in G2 Cell Cycle Arrest	REAC:R-HSA-6804114	0.0238567	4	CDK1,AURKA,CCNB1,GADD45A
REAC	Synthesis of Leukotrienes (LT) and Eoxins (EX)	REAC:R-HSA-2142691	0.0243547	2	DPEP3,DPEP2
REAC	Xenobiotics	REAC:R-HSA-211981	0.0243547	1	CYP1A1
REAC	G2/M DNA replication checkpoint	REAC:R-HSA-69478	0.0243547	2	CDK1,CCNB1
REAC	Defective ABCC8 can cause hypo- and hyper-glycemias	REAC:R-HSA-5683177	0.0246675	1	ABCC8
REAC	Fatty acid metabolism	REAC:R-HSA-8978868	0.0293525	4	CYP1A1,DPEP3,THRSP,DPEP2
REAC	Defective SLC22A18 causes lung cancer (LNCR) and embryonal rhabdomyosarcoma 1 (RMSE1)	REAC:R-HSA-5619066	0.0300734	1	SLC22A18
REAC	Aspartate and asparagine metabolism	REAC:R-HSA-8963693	0.0300734	1	ASPG
REAC	Cyclin A/B1/B2 associated events during G2/M transition	REAC:R-HSA-69273	0.0311026	4	CDK1,FOXM1,CCNB1,CDC25B
REAC	Phosphorylation of the APC/C	REAC:R-HSA-176412	0.033701	3	CDK1,UBE2C,CCNB1
REAC	Negative regulation of TCF-dependent signaling by WNT ligand antagonists	REAC:R-HSA-3772470	0.0350028	3	SFRP2,DKK2,WNT5A
REAC	Ovarian tumor domain proteases	REAC:R-HSA-5689896	0.0387896	4	CDK1,NOD2,DDX58,IFIH1
REAC	ECM proteoglycans	REAC:R-HSA-3000178	0.0407978	4	FMOD,ACAN,FN1,COL4A6
REAC	ATP sensitive Potassium channels	REAC:R-HSA-1296025	0.0433753	1	ABCC8
REAC	Activation of NIMA Kinases NEK9, NEK6, NEK7	REAC:R-HSA-2980767	0.0433753	2	CDK1,CCNB1
REAC	Tryptophan catabolism	REAC:R-HSA-71240	0.0460302	1	IDO1
REAC	Conversion from APC/C:Cdc20 to APC/C:Cdh1 in late anaphase	REAC:R-HSA-176407	0.0482639	2	CDC20,UBE2C

## Sheet: BAT cold DOWN
source	term_name	term_id	FDR	intersection_size	intersections
GO:MF	RNA binding	GO:0003723	1.13976e-14	101	AKAP1,ZFP36,RPF2,CSDC2,NOP14,CCDC86,TFRC,RRS1,PUSL1,MANF,PABPC1L,RRP12,CS,PNO1,SLC16A3,METTL1,NIP7,GAR1,PWP2,NAT10,RSL1D1,DIS3,PUS7,ACO1,GNL3,PPRC1,MYBBP1A,RRP7A,NABP1,TSR1,IMP4,AHCYL1,BOP1,NSUN6,EMG1,GRWD1,CALR,NOP16,NOLC1,NOL6,NOP2,UTP20,TRMT1,MAK16,FKBP4,RPP38,RBM34,PDIA4,SCAF1,FTSJ3,DDX56,NOP9,MRTO4,UTP4,WDR36,FBL,PUM3,NHP2,MRPL21,UTP15,NIFK,TIMM50,RRP8,GEMIN5,STIP1,BYSL,CCT6A,EIF4A1,USP10,MR…
GO:MF	organic cyclic compound binding	GO:0097159	3.42908e-05	185	AKAP1,TUBA4A,TUBA8,ACOX2,ONECUT2,NMRK2,ZFP36,MYO5B,HYOU1,HSPA5,ACOT7,BCL6,MTHFD1L,RPF2,CSDC2,WDR77,ABCC3,NOP14,CCDC86,TFRC,NOS3,RRS1,SPATA5,NLRC3,GOT1,PUSL1,MANF,PABPC1L,UGDH,PRAG1,RRP12,CS,ARL5A,PNO1,SLC16A3,METTL1,NIP7,GAR1,NLRP6,ABCA3,TEAD4,PWP2,NAT10,MAFF,PFKL,TAF4B,ABCB9,RSL1D1,DIS3,PUS7,ACO1,RAPGEF4,GNL3,IDH3A,SRL,PPRC1,GMPPB,NCOR2,MYBBP1A,RRP7A,NABP1,TSR1,IMP4,PFAS,PPARD,GLIS2,DNAJA4,AHCYL…
GO:MF	heterocyclic compound binding	GO:1901363	3.42908e-05	183	AKAP1,TUBA4A,TUBA8,ACOX2,ONECUT2,NMRK2,ZFP36,MYO5B,HYOU1,HSPA5,ACOT7,BCL6,MTHFD1L,RPF2,CSDC2,WDR77,ABCC3,NOP14,CCDC86,TFRC,NOS3,RRS1,SPATA5,NLRC3,GOT1,PUSL1,MANF,PABPC1L,UGDH,PRAG1,RRP12,CS,ARL5A,PNO1,SLC16A3,METTL1,NIP7,GAR1,NLRP6,ABCA3,TEAD4,PWP2,NAT10,MAFF,PFKL,TAF4B,ABCB9,RSL1D1,DIS3,PUS7,ACO1,RAPGEF4,GNL3,IDH3A,SRL,PPRC1,GMPPB,NCOR2,MYBBP1A,RRP7A,NABP1,TSR1,IMP4,PFAS,PPARD,GLIS2,DNAJA4,AHCYL…
GO:MF	RNA methyltransferase activity	GO:0008173	6.43788e-05	9	FDXACB1,WDR4,METTL1,NSUN6,EMG1,NOP2,TRMT1,FTSJ3,FBL
GO:MF	snoRNA binding	GO:0030515	6.43788e-05	7	NOP14,GAR1,TSR1,IMP4,NOLC1,NHP2,BYSL
GO:MF	unfolded protein binding	GO:0051082	0.000112123	13	HYOU1,HSPA5,NACAD,DNAJA4,CALR,GRPEL1,DNAJB11,HSPA13,CCT6A,CCT5,PFDN6,CANX,TOMM20
GO:MF	S-adenosylmethionine-dependent methyltransferase activity	GO:0008757	0.000112123	14	FDXACB1,WDR4,METTL1,SMYD5,NSUN6,EMG1,NOP2,TRMT1,FTSJ3,FBL,RRP8,CARNMT1,PRMT1,PRMT3
GO:MF	catalytic activity, acting on RNA	GO:0140098	0.000367178	22	PUSL1,FDXACB1,WDR4,METTL1,POLR3G,DIS3,NSUN6,VARS,EMG1,NOP2,TRMT1,RPP38,FTSJ3,DDX56,FBL,POLR3E,EIF4A1,POLR2E,ENDOV,YARS,DUS3L,FARSB
GO:MF	methyltransferase activity	GO:0008168	0.000987879	15	FDXACB1,WDR4,METTL1,SMYD5,NSUN6,EMG1,NOP2,TRMT1,FTSJ3,FBL,RRP8,CARNMT1,PRDM2,PRMT1,PRMT3
GO:MF	rRNA methyltransferase activity	GO:0008649	0.00106744	5	FDXACB1,EMG1,NOP2,FTSJ3,FBL
GO:MF	catalytic activity, acting on a rRNA	GO:0140102	0.00106744	5	FDXACB1,EMG1,NOP2,FTSJ3,FBL
GO:MF	transferase activity, transferring one-carbon groups	GO:0016741	0.00117697	15	FDXACB1,WDR4,METTL1,SMYD5,NSUN6,EMG1,NOP2,TRMT1,FTSJ3,FBL,RRP8,CARNMT1,PRDM2,PRMT1,PRMT3
GO:MF	chaperone binding	GO:0051087	0.00117697	11	HYOU1,HSPA5,TIMM9,SDF2L1,DNAJA4,CALR,GRPEL1,STIP1,ATP1A1,PFDN6,WRAP53
GO:MF	nucleic acid binding	GO:0003676	0.00117697	127	AKAP1,ONECUT2,ZFP36,BCL6,RPF2,CSDC2,WDR77,NOP14,CCDC86,TFRC,RRS1,PUSL1,MANF,PABPC1L,RRP12,CS,PNO1,SLC16A3,METTL1,NIP7,GAR1,TEAD4,PWP2,NAT10,MAFF,TAF4B,RSL1D1,DIS3,PUS7,ACO1,GNL3,PPRC1,NCOR2,MYBBP1A,RRP7A,NABP1,TSR1,IMP4,PPARD,GLIS2,AHCYL1,BOP1,NSUN6,EMG1,GRWD1,CALR,NOP16,NOLC1,NOL6,NOP2,UTP20,TRMT1,TRIM16,CRY1,MAK16,AEN,FKBP4,RPP38,RBM34,PDIA4,SCAF1,FTSJ3,DDX56,NOP9,MRTO4,UTP4,WDR36,FBL,PUM3,NHP2…
GO:MF	small molecule binding	GO:0036094	0.00128335	74	TUBA4A,TUBA8,ACOX2,NMRK2,MYO5B,FABP3,HYOU1,HSPA5,P4HA1,ACOT7,MTHFD1L,WDR77,ABCC3,NOS3,SPATA5,NLRC3,GOT1,PLOD2,UGDH,PRAG1,ARL5A,NLRP6,ABCA3,RPIA,NAT10,PFKL,ABCB9,RAPGEF4,GNL3,IDH3A,SRL,GMPPB,TSR1,PFAS,PPARD,DNAJA4,IDH2,ERLIN1,PKDCC,VARS,RHOBTB2,PIM2,NOLC1,CRY1,GRPEL1,NT5C3B,GNPNAT1,DHRS11,DDX56,HSPA13,ATP11A,HSPBP1,HSPA4,SRPRB,SAR1B,CCT6A,EIF4A1,RUVBL1,MAPKAPK2,ATP1A1,KIF16B,KDR,ARL8A,YARS,PRMT1,A…
GO:MF	nucleotide binding	GO:0000166	0.00137264	66	TUBA4A,TUBA8,ACOX2,NMRK2,MYO5B,HYOU1,HSPA5,ACOT7,MTHFD1L,WDR77,ABCC3,NOS3,SPATA5,NLRC3,UGDH,PRAG1,ARL5A,NLRP6,ABCA3,NAT10,PFKL,ABCB9,RAPGEF4,GNL3,IDH3A,SRL,GMPPB,TSR1,PFAS,DNAJA4,IDH2,PKDCC,VARS,RHOBTB2,PIM2,NOLC1,CRY1,GRPEL1,NT5C3B,DHRS11,DDX56,HSPA13,ATP11A,HSPBP1,HSPA4,SRPRB,SAR1B,CCT6A,EIF4A1,RUVBL1,MAPKAPK2,ATP1A1,KIF16B,KDR,ARL8A,YARS,PRMT1,ABCE1,ENTPD6,MYO1C,DUS3L,MAP2K1,FARSB,CCT5,HK1,STK…
GO:MF	box H/ACA snoRNA binding	GO:0034513	0.00137264	3	GAR1,NOLC1,NHP2
GO:MF	nucleoside phosphate binding	GO:1901265	0.00137264	66	TUBA4A,TUBA8,ACOX2,NMRK2,MYO5B,HYOU1,HSPA5,ACOT7,MTHFD1L,WDR77,ABCC3,NOS3,SPATA5,NLRC3,UGDH,PRAG1,ARL5A,NLRP6,ABCA3,NAT10,PFKL,ABCB9,RAPGEF4,GNL3,IDH3A,SRL,GMPPB,TSR1,PFAS,DNAJA4,IDH2,PKDCC,VARS,RHOBTB2,PIM2,NOLC1,CRY1,GRPEL1,NT5C3B,DHRS11,DDX56,HSPA13,ATP11A,HSPBP1,HSPA4,SRPRB,SAR1B,CCT6A,EIF4A1,RUVBL1,MAPKAPK2,ATP1A1,KIF16B,KDR,ARL8A,YARS,PRMT1,ABCE1,ENTPD6,MYO1C,DUS3L,MAP2K1,FARSB,CCT5,HK1,STK…
GO:MF	tRNA (guanine-N7-)-methyltransferase activity	GO:0008176	0.00182537	2	WDR4,METTL1
GO:MF	protein folding chaperone	GO:0044183	0.00201608	6	HSPA5,CALR,HSPA13,CCT6A,HSPB1,CCT5
GO:MF	peptide alpha-N-acetyltransferase activity	GO:0004596	0.00264679	4	NAA40,NAA20,NAA50,NAA10
GO:MF	carboxylic acid binding	GO:0031406	0.00539811	6	ACOX2,FABP3,P4HA1,NOS3,GOT1,PLOD2
GO:MF	ribonucleoprotein complex binding	GO:0043021	0.00539811	12	HSPA5,BOP1,NOLC1,WDR12,TIMM50,GEMIN5,ABCE1,XPO5,PRMT3,EIF2S1,NAA10,SNRPC
GO:MF	catalytic activity, acting on a tRNA	GO:0140101	0.00539811	10	PUSL1,WDR4,METTL1,NSUN6,VARS,TRMT1,RPP38,YARS,DUS3L,FARSB
GO:MF	tRNA methyltransferase activity	GO:0008175	0.010852	4	WDR4,METTL1,NSUN6,TRMT1
GO:MF	voltage-gated calcium channel activity involved SA node cell action potential	GO:0086059	0.010852	1	CACNA1G
GO:MF	phosphocholine phosphatase activity	GO:0052731	0.010852	1	PHOSPHO1
GO:MF	phosphoethanolamine phosphatase activity	GO:0052732	0.010852	1	PHOSPHO1
GO:MF	voltage-gated calcium channel activity involved in AV node cell action potential	GO:0086056	0.010852	1	CACNA1G
GO:MF	misfolded protein binding	GO:0051787	0.010852	4	HSPA5,SDF2L1,DNAJB11,HSPA13
GO:MF	low voltage-gated calcium channel activity	GO:0008332	0.010852	1	CACNA1G
GO:MF	carboxylic acid transmembrane transporter activity	GO:0046943	0.010852	6	SLC16A5,SLC7A5,ABCC3,SLC51B,SLC38A1,SLC16A3
GO:MF	monocarboxylic acid transmembrane transporter activity	GO:0008028	0.010852	5	SLC16A5,ABCC3,SLC51B,SLC16A3,SLC16A1
GO:MF	organic acid transmembrane transporter activity	GO:0005342	0.010852	6	SLC16A5,SLC7A5,ABCC3,SLC51B,SLC38A1,SLC16A3
GO:MF	tRNA binding	GO:0000049	0.010852	7	METTL1,NAT10,NSUN6,TRMT1,YRDC,YARS,XPO5
GO:MF	interleukin-1 type I receptor antagonist activity	GO:0045352	0.010852	1	IL1RN
GO:MF	tRNA (guanine) methyltransferase activity	GO:0016423	0.010852	3	WDR4,METTL1,TRMT1
GO:MF	rRNA (uridine) methyltransferase activity	GO:0016436	0.010852	2	FDXACB1,FTSJ3
GO:MF	basal RNA polymerase II transcription machinery binding	GO:0001099	0.010852	7	NOLC1,SCAF1,FBL,RUVBL1,WDR43,DRAP1,SCAF4
GO:MF	basal transcription machinery binding	GO:0001098	0.010852	7	NOLC1,SCAF1,FBL,RUVBL1,WDR43,DRAP1,SCAF4
GO:MF	intramolecular oxidoreductase activity	GO:0016860	0.010852	5	CRELD2,ERO1A,MRI1,RPIA,PDIA4
GO:MF	RNA polymerase II general transcription initiation factor binding	GO:0001091	0.010852	4	NOLC1,FBL,RUVBL1,DRAP1
GO:MF	organic hydroxy compound transmembrane transporter activity	GO:1901618	0.010852	5	ABCC3,SLC51B,SLC16A3,SLC16A1,SLC5A3
GO:MF	interleukin-1 type II receptor antagonist activity	GO:0045353	0.010852	1	IL1RN
GO:MF	U1 snRNA binding	GO:0030619	0.0120975	3	GEMIN5,SNRPA,SNRPC
GO:MF	5S rRNA binding	GO:0008097	0.0133435	2	RPF2,RRS1
GO:MF	purine nucleotide binding	GO:0017076	0.0133435	55	TUBA4A,TUBA8,NMRK2,MYO5B,HYOU1,HSPA5,ACOT7,MTHFD1L,ABCC3,SPATA5,NLRC3,PRAG1,ARL5A,NLRP6,ABCA3,NAT10,PFKL,ABCB9,RAPGEF4,GNL3,SRL,GMPPB,TSR1,PFAS,DNAJA4,PKDCC,VARS,RHOBTB2,PIM2,NOLC1,GRPEL1,DDX56,HSPA13,ATP11A,HSPBP1,HSPA4,SRPRB,SAR1B,CCT6A,EIF4A1,RUVBL1,MAPKAPK2,ATP1A1,KIF16B,KDR,ARL8A,YARS,ABCE1,ENTPD6,MYO1C,MAP2K1,FARSB,CCT5,HK1,STK10
GO:MF	apelin receptor binding	GO:0031704	0.0133435	1	APLN
GO:MF	ion channel binding	GO:0044325	0.0136255	9	CBARP,KCNAB3,FGF12,STAC,SNTA1,SLC5A3,NEDD4L,USP10,CHERP
GO:MF	corticotropin-releasing hormone receptor activity	GO:0043404	0.0140143	1	CRHR2
GO:MF	corticotrophin-releasing factor receptor activity	GO:0015056	0.0140143	1	CRHR2
GO:MF	ABC-type transporter activity	GO:0140359	0.0140143	3	ABCC3,ABCA3,ABCB9
GO:MF	3alpha,7alpha,12alpha-trihydroxy-5beta-cholestanoyl-CoA 24-hydroxylase activity	GO:0033791	0.0140143	1	ACOX2
GO:MF	voltage-gated calcium channel activity involved in cardiac muscle cell action potential	GO:0086007	0.0144662	1	CACNA1G
GO:MF	isomerase activity	GO:0016853	0.0144662	9	CRELD2,ERO1A,PUSL1,MRI1,RPIA,PUS7,FKBP4,PDIA4,PGM2
GO:MF	interleukin-1, type II receptor binding	GO:0005151	0.0146329	1	IL1RN
GO:MF	isocitrate dehydrogenase activity	GO:0004448	0.0146329	2	IDH3A,IDH2
GO:MF	interleukin-1, type I receptor binding	GO:0005150	0.0146329	1	IL1RN
GO:MF	ATPase	GO:0016887	0.0150463	24	MYO5B,HYOU1,HSPA5,ABCC3,SPATA5,ABCA3,ABCB9,ATP1B3,DDX56,HSPA13,ATP11A,HSPA4,CCT6A,EIF4A1,RUVBL1,ATP1A1,KIF16B,ABCE1,MYO1C,CCT5,ABCF2,MYH9,G3BP1,PTPA
GO:MF	receptor ligand activity	GO:0048018	0.015237	3	CCL1,APLN,IL1RN
GO:MF	guanyl-nucleotide exchange factor activity	GO:0005085	0.015237	10	PSD2,RASGEF1A,DIS3,RAPGEF4,PSD3,RASGRF2,RGL1,SH2D3C,DOCK5,RIN3
GO:MF	signaling receptor activator activity	GO:0030546	0.0156154	3	CCL1,APLN,IL1RN
GO:MF	cytokine binding	GO:0019955	0.0158333	3	IL1RN,COMP,ZFP36
GO:MF	deoxyuridine phosphorylase activity	GO:0047847	0.0158333	1	UPP1
GO:MF	thymidine phosphorylase activity	GO:0009032	0.0158333	1	UPP1
GO:MF	catalytic activity	GO:0003824	0.0158333	132	TUBA4A,PHOSPHO1,UPP1,TUBA8,ACOX2,NMRK2,ASPHD2,MASP1,SMPD3,KCNAB3,MYO5B,HSPA5,P4HA1,XYLT1,ACOT7,HS3ST2,RDH13,MTHFD1L,CRELD2,TFRC,NOS3,ABHD8,SPATA5,GOT1,PLOD2,ERO1A,PUSL1,UGDH,PRAG1,CS,FDXACB1,WDR4,CCND1,METTL1,MRI1,POLR3G,SMYD5,UBASH3B,ENPEP,RPIA,NAT10,PTPRE,PFKL,DIS3,PUS7,ACO1,MST1,IDH3A,GMPPB,CAPN15,A4GALT,TSR1,SDF2L1,PFAS,NGLY1,PCYT2,AHCYL1,IDH2,PKDCC,NSUN6,VARS,EMG1,RHOBTB2,PIM2,NOP2,TRMT1,TRI…
GO:MF	uridine phosphorylase activity	GO:0004850	0.0158333	1	UPP1
GO:MF	ribonucleotide binding	GO:0032553	0.0158812	54	TUBA4A,TUBA8,NMRK2,MYO5B,HYOU1,HSPA5,ACOT7,MTHFD1L,ABCC3,NOS3,SPATA5,NLRC3,PRAG1,ARL5A,NLRP6,ABCA3,NAT10,PFKL,ABCB9,RAPGEF4,GNL3,SRL,GMPPB,TSR1,PFAS,DNAJA4,PKDCC,VARS,RHOBTB2,PIM2,NOLC1,DDX56,HSPA13,ATP11A,HSPA4,SRPRB,SAR1B,CCT6A,EIF4A1,RUVBL1,MAPKAPK2,ATP1A1,KIF16B,KDR,ARL8A,YARS,ABCE1,ENTPD6,MYO1C,MAP2K1,FARSB,CCT5,HK1,STK10
GO:MF	telomerase RNA binding	GO:0070034	0.0158812	4	GAR1,NHP2,NAF1,WRAP53
GO:MF	protein kinase A regulatory subunit binding	GO:0034237	0.0179575	1	AKAP1
GO:MF	protein disulfide isomerase activity	GO:0003756	0.0179575	3	CRELD2,ERO1A,PDIA4
GO:MF	intramolecular oxidoreductase activity, transposing S-S bonds	GO:0016864	0.0179575	3	CRELD2,ERO1A,PDIA4
GO:MF	interleukin-1 receptor antagonist activity	GO:0005152	0.0179575	1	IL1RN
GO:MF	peptide-serine-N-acetyltransferase activity	GO:1990189	0.0179575	2	NAA40,NAA10
GO:MF	monosaccharide binding	GO:0048029	0.0182829	5	P4HA1,PLOD2,RPIA,PFKL,GNPNAT1
GO:MF	lactate transmembrane transporter activity	GO:0015129	0.0194756	2	SLC16A3,SLC16A1
GO:MF	neutral sphingomyelin phosphodiesterase activity	GO:0061751	0.0194756	1	SMPD3
GO:MF	purine ribonucleotide binding	GO:0032555	0.0194756	53	TUBA4A,TUBA8,NMRK2,MYO5B,HYOU1,HSPA5,ACOT7,MTHFD1L,ABCC3,SPATA5,NLRC3,PRAG1,ARL5A,NLRP6,ABCA3,NAT10,PFKL,ABCB9,RAPGEF4,GNL3,SRL,GMPPB,TSR1,PFAS,DNAJA4,PKDCC,VARS,RHOBTB2,PIM2,NOLC1,DDX56,HSPA13,ATP11A,HSPA4,SRPRB,SAR1B,CCT6A,EIF4A1,RUVBL1,MAPKAPK2,ATP1A1,KIF16B,KDR,ARL8A,YARS,ABCE1,ENTPD6,MYO1C,MAP2K1,FARSB,CCT5,HK1,STK10
GO:MF	intramolecular oxidoreductase activity, interconverting aldoses and ketoses	GO:0016861	0.0194756	2	MRI1,RPIA
GO:MF	structural constituent of cytoskeleton	GO:0005200	0.0202442	2	TUBA4A,TUBA8
GO:MF	ribosylnicotinate kinase activity	GO:0061769	0.0206958	1	NMRK2
GO:MF	ribosylnicotinamide kinase activity	GO:0050262	0.0206958	1	NMRK2
GO:MF	xenobiotic transmembrane transporter activity	GO:0042910	0.0213852	3	ABCC3,ABCA3,SLC2A1
GO:MF	purine ribonucleoside triphosphate binding	GO:0035639	0.02216	52	TUBA4A,TUBA8,NMRK2,MYO5B,HYOU1,HSPA5,MTHFD1L,ABCC3,SPATA5,NLRC3,PRAG1,ARL5A,NLRP6,ABCA3,NAT10,PFKL,ABCB9,GNL3,SRL,GMPPB,TSR1,PFAS,DNAJA4,PKDCC,VARS,RHOBTB2,PIM2,NOLC1,DDX56,HSPA13,ATP11A,HSPA4,SRPRB,SAR1B,CCT6A,EIF4A1,RUVBL1,MAPKAPK2,ATP1A1,KIF16B,KDR,ARL8A,YARS,ABCE1,ENTPD6,MYO1C,MAP2K1,FARSB,CCT5,HK1,STK10,MAT2A
GO:MF	interleukin-2 receptor binding	GO:0005134	0.0230672	2	ECM1,TIMM50
GO:MF	gated channel activity	GO:0022836	0.0241948	4	CACNA1G,TMEM266,TRPM3,KCNAB3
GO:MF	active transmembrane transporter activity	GO:0022804	0.0246551	12	SLC16A5,SLC7A5,ABCC3,SLC38A1,SLC16A3,ABCA3,ABCB9,ATP1B3,SLC12A4,SLC16A1,SLC5A3,SLC41A1
GO:MF	anion binding	GO:0043168	0.0246551	63	TUBA4A,TUBA8,ACOX2,NMRK2,SMPD3,MYO5B,FABP3,HYOU1,HSPA5,P4HA1,MTHFD1L,ABCC3,NOS3,SPATA5,NLRC3,GOT1,PLOD2,PRAG1,ARL5A,NLRP6,ABCA3,NAT10,PFKL,ABCB9,RAPGEF4,GNL3,SRL,GMPPB,TSR1,PFAS,PPARD,DNAJA4,PKDCC,VARS,RHOBTB2,PIM2,NOLC1,CRY1,DDX56,HSPA13,ATP11A,ASAP1,HSPA4,SRPRB,SAR1B,CCT6A,EIF4A1,RUVBL1,MAPKAPK2,ATP1A1,KIF16B,KDR,ARL8A,YARS,ABCE1,ENTPD6,MYO1C,DUS3L,MAP2K1,FARSB,CCT5,HK1,STK10
GO:MF	fatty acid binding	GO:0005504	0.0254378	2	ACOX2,FABP3
GO:MF	aldo-keto reductase (NADP) activity	GO:0004033	0.0257906	2	KCNAB3,RDH13
GO:MF	G protein-coupled peptide receptor activity	GO:0008528	0.0259384	5	CRHR2,GPR17,HCRTR1,AGTR1,NLRP6
GO:MF	pyrophosphatase activity	GO:0016462	0.0260036	3	TUBA4A,PHOSPHO1,TUBA8
GO:MF	bile acid transmembrane transporter activity	GO:0015125	0.0263483	2	ABCC3,SLC51B
GO:MF	[heparan sulfate]-glucosamine 3-sulfotransferase 2 activity	GO:0033871	0.0265271	1	HS3ST2
GO:MF	hydrolase activity, acting on acid anhydrides, in phosphorus-containing anhydrides	GO:0016818	0.0267278	3	TUBA4A,PHOSPHO1,TUBA8
GO:MF	hydrolase activity, acting on acid anhydrides	GO:0016817	0.0267278	3	TUBA4A,PHOSPHO1,TUBA8
GO:MF	peptide receptor activity	GO:0001653	0.0272915	5	CRHR2,GPR17,HCRTR1,AGTR1,NLRP6
GO:MF	protein kinase A binding	GO:0051018	0.0276099	1	AKAP1
GO:MF	protein binding	GO:0005515	0.0287967	335	AKAP1,CCL1,CACNA1G,TUBA4A,CBARP,APLN,CRHR2,IL1RN,PHOSPHO1,UPP1,TUBA8,SAPCD2,SLC16A5,ACOX2,NMRK2,MASP1,COMP,TMEM266,ARMC7,PSD2,TMEM182,ZFP36,IL7R,SMPD3,KCNAB3,SLC7A5,VEGFA,MYO5B,FABP3,HYOU1,AKAP12,HSPA5,GPR17,SPRED3,C7,P4HA1,FGF12,CNKSR3,ACOT7,BCL6,STAC3,MTHFD1L,PNMA2,RPF2,GUCA1A,SPRY4,CSDC2,WDR77,KCNG2,RGS16,STAC2,STAC,CRELD2,NOP14,CCDC86,SDC4,SLC51B,TFRC,MDGA1,NOS3,ABHD8,RRS1,NLRC3,NACAD,MDFI,SD…
GO:MF	organic acid binding	GO:0043177	0.0287967	4	FABP3,P4HA1,NOS3,PLOD2
GO:MF	palmitoyl-CoA oxidase activity	GO:0016401	0.0288445	1	ACOX2
GO:MF	adenyl nucleotide binding	GO:0030554	0.0288445	45	NMRK2,MYO5B,HYOU1,HSPA5,ACOT7,MTHFD1L,ABCC3,SPATA5,NLRC3,PRAG1,NLRP6,ABCA3,NAT10,PFKL,ABCB9,RAPGEF4,PFAS,DNAJA4,PKDCC,VARS,PIM2,NOLC1,GRPEL1,DDX56,HSPA13,ATP11A,HSPBP1,HSPA4,CCT6A,EIF4A1,RUVBL1,MAPKAPK2,ATP1A1,KIF16B,KDR,YARS,ABCE1,ENTPD6,MYO1C,MAP2K1,FARSB,CCT5,HK1,STK10,MAT2A
GO:MF	interleukin-7 receptor activity	GO:0004917	0.0288445	1	IL7R
GO:MF	general transcription initiation factor binding	GO:0140296	0.0288445	5	NOLC1,FBL,RUVBL1,DRAP1,YEATS2
GO:MF	glucuronoside transmembrane transporter activity	GO:0015164	0.0293061	1	ABCC3
GO:MF	transferase activity	GO:0016740	0.0303414	68	UPP1,NMRK2,XYLT1,HS3ST2,ABHD8,GOT1,PRAG1,CS,FDXACB1,WDR4,CCND1,METTL1,POLR3G,SMYD5,NAT10,PFKL,GMPPB,A4GALT,SDF2L1,PCYT2,PKDCC,NSUN6,EMG1,PIM2,NOP2,TRMT1,TRIM16,CHST1,GNPNAT1,B3GNTL1,LPCAT3,NAA40,FTSJ3,SRM,ALG5,NEDD4L,PIGW,FBL,POLR3E,RRP8,TNFAIP1,PDSS1,RNF149,POLR2E,MAPKAPK2,UMPS,DPH1,NUS1,YRDC,CARNMT1,KDR,PRDM2,PRMT1,MAP2K1,PRMT3,HK1,HGS,STK10,NAA20,MAT2A,AKAP10,CERS2,PIGC,AASDHPPT,CIAPIN1,NAA50,…
GO:MF	L-tryptophan transmembrane transporter activity	GO:0015196	0.0304326	1	SLC7A5
GO:MF	voltage-gated channel activity	GO:0022832	0.0304326	4	CACNA1G,TMEM266,KCNAB3,KCNG2
GO:MF	transmembrane transporter activity	GO:0022857	0.0313802	19	CACNA1G,SLC16A5,TMEM266,TRPM3,KCNAB3,SLC7A5,KCNG2,ABCC3,SLC51B,SLC17A9,SLC38A1,SLC16A3,ATP5MC1,ABCA3,ABCB9,SLC2A1,SVOPL,ATP1B3,SLC12A4
GO:MF	G protein-coupled receptor binding	GO:0001664	0.0315735	2	CCL1,APLN
GO:MF	ABC-type xenobiotic transporter activity	GO:0008559	0.0316154	2	ABCC3,ABCA3
GO:MF	L-ascorbic acid binding	GO:0031418	0.0318604	2	P4HA1,PLOD2
GO:MF	oleic acid binding	GO:0070538	0.0318604	1	FABP3
GO:MF	voltage-gated sodium channel activity	GO:0005248	0.0318604	1	CACNA1G
GO:MF	sulfur compound binding	GO:1901681	0.0318604	4	COMP,VEGFA,FGF12,ACOT7
GO:MF	enzyme binding	GO:0019899	0.0321471	63	TUBA4A,COMP,ZFP36,MYO5B,AKAP12,HSPA5,SPRED3,NOP14,SDC4,TFRC,SH2B2,SRCIN1,CCND1,UBASH3B,NAT10,MLEC,PFKL,PUS7,RAPGEF4,MST1,SLC2A1,SNTA1,NCOR2,ATP1B3,SDF2L1,SLC12A4,ERLIN1,RHOBTB2,CALR,CRY1,ECM1,SCAF1,FBL,HSPBP1,RIN3,VCL,TNFAIP1,DET1,PA2G4,RUVBL1,MAPKAPK2,ATP1A1,WDR43,FZD4,PRMT1,HSPB1,XPO5,MYO1C,MAVS,HGS,CPSF1,SCAF4,PHB,BACE1,ZPR1,CNOT9,RAD23A,SH2B3,WRAP53,PTPA,EIF4E2,RANBP1,DAB2IP
GO:MF	carbohydrate derivative binding	GO:0097367	0.0321471	59	TUBA4A,TUBA8,NMRK2,COMP,VEGFA,MYO5B,HYOU1,HSPA5,FGF12,ACOT7,MTHFD1L,ABCC3,NOS3,SPATA5,NLRC3,MANF,PRAG1,ARL5A,NLRP6,ABCA3,NAT10,PFKL,ABCB9,RAPGEF4,GNL3,SRL,GMPPB,TSR1,PFAS,DNAJA4,PKDCC,VARS,RHOBTB2,PIM2,NOLC1,DDX56,HSPA13,ATP11A,HAPLN3,HSPA4,SRPRB,SAR1B,CCT6A,EIF4A1,RUVBL1,MAPKAPK2,ATP1A1,KIF16B,KDR,ARL8A,YARS,ABCE1,ENTPD6,MYO1C,MAP2K1,FARSB,CCT5,HK1,STK10
GO:MF	interleukin-1 binding	GO:0019966	0.0323236	1	IL1RN
GO:MF	pseudouridine synthase activity	GO:0009982	0.0328993	2	PUSL1,PUS7
GO:MF	fibronectin binding	GO:0001968	0.0342552	2	VEGFA,SDC4
GO:MF	cytokine activity	GO:0005125	0.0342552	2	CCL1,IL1RN
GO:MF	L-cysteine:2-oxoglutarate aminotransferase activity	GO:0047801	0.0342552	1	GOT1
GO:MF	oxidoreductase activity	GO:0016491	0.0342552	10	ACOX2,ASPHD2,KCNAB3,P4HA1,RDH13,MTHFD1L,NOS3,PLOD2,ERO1A,UGDH
GO:MF	N-acetyltransferase activity	GO:0008080	0.0342749	6	NAT10,GNPNAT1,NAA40,NAA20,NAA50,NAA10
GO:MF	transporter activity	GO:0005215	0.0344118	20	CACNA1G,SLC16A5,TMEM266,TRPM3,KCNAB3,SLC7A5,FABP3,KCNG2,ABCC3,SLC51B,SLC17A9,SLC38A1,SLC16A3,ATP5MC1,ABCA3,ABCB9,SLC2A1,SVOPL,ATP1B3,SLC12A4
GO:MF	primary active transmembrane transporter activity	GO:0015399	0.0344118	8	ABCC3,ABCA3,ABCB9,ATP1B3,ATP1A1,ABCE1,ABCF2,TOMM20
GO:MF	rRNA binding	GO:0019843	0.0347783	4	RPF2,RRS1,IMP4,EMG1
GO:MF	protein xylosyltransferase activity	GO:0030158	0.0356057	1	XYLT1
GO:MF	identical protein binding	GO:0042802	0.0371205	26	APLN,UPP1,ACOX2,MASP1,TMEM266,SMPD3,VEGFA,P4HA1,ACOT7,BCL6,STAC3,MTHFD1L,SDC4,TFRC,MDFI,TENM4,UGDH,PRAG1,SH2B2,MRI1,UBASH3B,RPIA,TIMM9,PFKL,ABCB9,TIMM8A
GO:MF	UDP-glucose 6-dehydrogenase activity	GO:0003979	0.0371205	1	UGDH
GO:MF	transferase activity, transferring alkyl or aryl (other than methyl) groups	GO:0016765	0.0371205	5	SRM,PDSS1,DPH1,NUS1,MAT2A
GO:MF	N-acyltransferase activity	GO:0016410	0.0371205	7	NAT10,GNPNAT1,NAA40,NAA20,CERS2,NAA50,NAA10
GO:MF	oxidoreductase activity, acting on the CH-OH group of donors, NAD or NADP as acceptor	GO:0016616	0.0371672	6	KCNAB3,RDH13,UGDH,IDH3A,IDH2,DHRS11
GO:MF	rRNA (uridine-N3-)-methyltransferase activity	GO:0070042	0.0376271	1	FDXACB1
GO:MF	vascular endothelial growth factor receptor 1 binding	GO:0043183	0.0376271	1	VEGFA
GO:MF	citrate synthase activity	GO:0036440	0.0376271	1	CS
GO:MF	chemokine activity	GO:0008009	0.0376271	1	CCL1
GO:MF	CCR chemokine receptor binding	GO:0048020	0.0376271	1	CCL1
GO:MF	acyl-CoA oxidase activity	GO:0003997	0.0376271	1	ACOX2
GO:MF	citrate (Si)-synthase activity	GO:0004108	0.0376271	1	CS
GO:MF	formate-tetrahydrofolate ligase activity	GO:0004329	0.0376271	1	MTHFD1L
GO:MF	heat shock protein binding	GO:0031072	0.0384357	7	ZFP36,HSPA5,DNAJA4,FKBP4,HSPA13,STIP1,KDR
GO:MF	cytokine receptor binding	GO:0005126	0.0392444	2	CCL1,IL1RN
GO:MF	angiotensin type I receptor activity	GO:0001596	0.0397907	1	AGTR1
GO:MF	phosphatidylcholine transfer activity	GO:0120019	0.0409123	2	ABCA3,PITPNB
GO:MF	calmodulin binding	GO:0005516	0.0420771	6	MYO5B,AKAP12,RGS16,NOS3,NDUFAF4,SNTA1
GO:MF	S-methyl-5-thioribose-1-phosphate isomerase activity	GO:0046523	0.0422268	1	MRI1
GO:MF	heparin binding	GO:0008201	0.0424791	3	COMP,VEGFA,FGF12
GO:MF	ribose-5-phosphate isomerase activity	GO:0004751	0.043128	1	RPIA
GO:MF	P-type sodium transporter activity	GO:0008554	0.043128	2	ATP1B3,ATP1A1
GO:MF	oxidoreductase activity, acting on CH or CH2 groups	GO:0016725	0.043128	1	ACOX2
GO:MF	rRNA cytidine N-acetyltransferase activity	GO:1990883	0.043128	1	NAT10
GO:MF	lipid transporter activity	GO:0005319	0.043128	5	FABP3,ABCC3,SLC51B,ABCA3,SLC2A1
GO:MF	P-type sodium:potassium-exchanging transporter activity	GO:0005391	0.043128	2	ATP1B3,ATP1A1
GO:MF	mRNA N-acetyltransferase activity	GO:0106162	0.043128	1	NAT10
GO:MF	long-chain fatty acid binding	GO:0036041	0.0432994	2	FABP3,PPARD
GO:MF	channel activity	GO:0015267	0.0436291	4	CACNA1G,TMEM266,TRPM3,KCNAB3
GO:MF	adenyl ribonucleotide binding	GO:0032559	0.0436291	43	NMRK2,MYO5B,HYOU1,HSPA5,ACOT7,MTHFD1L,ABCC3,SPATA5,NLRC3,PRAG1,NLRP6,ABCA3,NAT10,PFKL,ABCB9,RAPGEF4,PFAS,DNAJA4,PKDCC,VARS,PIM2,NOLC1,DDX56,HSPA13,ATP11A,HSPA4,CCT6A,EIF4A1,RUVBL1,MAPKAPK2,ATP1A1,KIF16B,KDR,YARS,ABCE1,ENTPD6,MYO1C,MAP2K1,FARSB,CCT5,HK1,STK10,MAT2A
GO:MF	passive transmembrane transporter activity	GO:0022803	0.0436291	4	CACNA1G,TMEM266,TRPM3,KCNAB3
GO:MF	interleukin-1 receptor binding	GO:0005149	0.0436291	1	IL1RN
GO:MF	sodium channel activity	GO:0005272	0.0436291	1	CACNA1G
GO:MF	voltage-gated calcium channel activity	GO:0005245	0.0436291	1	CACNA1G
GO:MF	intramolecular transferase activity	GO:0016866	0.0436291	3	PUSL1,PUS7,PGM2
GO:MF	oxidoreductase activity, acting on CH-OH group of donors	GO:0016614	0.0436291	6	KCNAB3,RDH13,UGDH,IDH3A,IDH2,DHRS11
GO:MF	transferrin receptor activity	GO:0004998	0.0436291	1	TFRC
GO:MF	N-methyltransferase activity	GO:0008170	0.0436291	6	FDXACB1,SMYD5,TRMT1,FBL,PRMT1,PRMT3
GO:MF	pentosyltransferase activity	GO:0016763	0.0436291	2	UPP1,XYLT1
GO:MF	nucleoside-triphosphatase regulator activity	GO:0060589	0.0436291	15	PSD2,RGS16,RASGEF1A,DIS3,RAPGEF4,ATP1B3,PSD3,RASGRF2,GRPEL1,RGL1,SH2D3C,ASAP1,DOCK5,HSPBP1,RIN3
GO:MF	long-chain fatty acid transporter activity	GO:0005324	0.0447895	2	FABP3,SLC2A1
GO:MF	RNA cap binding	GO:0000339	0.0447895	3	GEMIN5,EIF4A1,EIF4E2
GO:MF	chemokine receptor binding	GO:0042379	0.0447895	1	CCL1
GO:MF	monocarboxylic acid binding	GO:0033293	0.0449125	2	ACOX2,FABP3
GO:MF	mannose-phosphate guanylyltransferase activity	GO:0008905	0.0457364	1	GMPPB
GO:MF	mannose-1-phosphate guanylyltransferase activity	GO:0004475	0.0457364	1	GMPPB
GO:MF	dioxygenase activity	GO:0051213	0.0462449	3	ASPHD2,P4HA1,PLOD2
GO:MF	oxidoreductase activity, acting on the CH-CH group of donors, oxygen as acceptor	GO:0016634	0.0462612	1	ACOX2
GO:MF	L-leucine transmembrane transporter activity	GO:0015190	0.0463109	1	SLC7A5
GO:MF	phosphatidylserine decarboxylase activity	GO:0004609	0.0464011	1	GOT1
GO:MF	neuropilin binding	GO:0038191	0.0466411	1	VEGFA
GO:MF	calcium channel activity	GO:0005262	0.0466411	2	CACNA1G,TRPM3
GO:MF	lactosylceramide 4-alpha-galactosyltransferase activity	GO:0050512	0.0466411	1	A4GALT
GO:MF	orexin receptor activity	GO:0016499	0.0466411	1	HCRTR1
GO:MF	phosphoribosylformylglycinamidine synthase activity	GO:0004642	0.0478358	1	PFAS
GO:MF	peptide-N4-(N-acetyl-beta-glucosaminyl)asparagine amidase activity	GO:0000224	0.0481525	1	NGLY1
GO:MF	linoleic acid binding	GO:0070539	0.048179	1	PPARD
GO:MF	ethanolamine-phosphate cytidylyltransferase activity	GO:0004306	0.0487757	1	PCYT2
GO:MF	protein homodimerization activity	GO:0042803	0.0488021	6	ACOX2,MASP1,TMEM266,VEGFA,ACOT7,MTHFD1L
GO:MF	icosanoid transmembrane transporter activity	GO:0071714	0.0489537	1	ABCC3
GO:MF	RNA polymerase II C-terminal domain binding	GO:0099122	0.0490236	2	SCAF1,SCAF4
GO:MF	ATP binding	GO:0005524	0.0491626	41	NMRK2,MYO5B,HYOU1,HSPA5,MTHFD1L,ABCC3,SPATA5,NLRC3,PRAG1,NLRP6,ABCA3,NAT10,PFKL,ABCB9,PFAS,DNAJA4,PKDCC,VARS,PIM2,NOLC1,DDX56,HSPA13,ATP11A,HSPA4,CCT6A,EIF4A1,RUVBL1,MAPKAPK2,ATP1A1,KIF16B,KDR,YARS,ABCE1,ENTPD6,MYO1C,MAP2K1,FARSB,CCT5,HK1,STK10,MAT2A
GO:MF	adenyl-nucleotide exchange factor activity	GO:0000774	0.0493224	2	GRPEL1,HSPBP1
GO:MF	voltage-gated cation channel activity	GO:0022843	0.0493224	3	CACNA1G,KCNAB3,KCNG2
GO:MF	symporter activity	GO:0015293	0.0495447	6	SLC16A5,SLC38A1,SLC16A3,SLC12A4,SLC16A1,SLC5A3
GO:MF	scaffold protein binding	GO:0097110	0.0496987	1	CACNA1G
GO:MF	rRNA (pseudouridine) methyltransferase activity	GO:0070037	0.0496987	1	EMG1
GO:MF	ATPase-coupled transmembrane transporter activity	GO:0042626	0.0496987	7	ABCC3,ABCA3,ABCB9,ATP1B3,ATP1A1,ABCE1,ABCF2
GO:MF	thyroid hormone transmembrane transporter activity	GO:0015349	0.0498911	1	SLC7A5
GO:BP	ribosome biogenesis	GO:0042254	1.47409e-21	46	RPF2,NOP14,RRS1,RRP12,FDXACB1,NIP7,GAR1,PWP2,NAT10,RSL1D1,DIS3,MYBBP1A,RRP7A,TSR1,RRP15,IMP4,BOP1,EMG1,NOP16,NOLC1,NOL6,NOP2,UTP20,MAK16,RPP38,WDR12,LTV1,FTSJ3,DDX56,NOP9,MRTO4,UTP4,WDR36,FBL,NHP2,UTP15,NIFK,RRP8,BYSL,NAF1,PA2G4,WDR43,ABCE1,MTERF3,PDCD11,MRPL20
GO:BP	rRNA processing	GO:0006364	2.88934e-21	38	RPF2,NOP14,RRS1,RRP12,FDXACB1,GAR1,PWP2,NAT10,RSL1D1,DIS3,RRP7A,TSR1,RRP15,IMP4,BOP1,EMG1,NOLC1,NOL6,NOP2,UTP20,MAK16,RPP38,WDR12,FTSJ3,DDX56,NOP9,MRTO4,UTP4,WDR36,FBL,NHP2,UTP15,NIFK,RRP8,BYSL,NAF1,PA2G4,WDR43
GO:BP	rRNA metabolic process	GO:0016072	7.57922e-21	38	RPF2,NOP14,RRS1,RRP12,FDXACB1,GAR1,PWP2,NAT10,RSL1D1,DIS3,RRP7A,TSR1,RRP15,IMP4,BOP1,EMG1,NOLC1,NOL6,NOP2,UTP20,MAK16,RPP38,WDR12,FTSJ3,DDX56,NOP9,MRTO4,UTP4,WDR36,FBL,NHP2,UTP15,NIFK,RRP8,BYSL,NAF1,PA2G4,WDR43
GO:BP	ncRNA processing	GO:0034470	1.07401e-20	46	RPF2,NOP14,RRS1,PUSL1,RRP12,FDXACB1,WDR4,METTL1,GAR1,PWP2,NAT10,RSL1D1,DIS3,PUS7,RRP7A,TSR1,RRP15,IMP4,INTS1,BOP1,NSUN6,EMG1,NOLC1,NOL6,NOP2,UTP20,TRMT1,MAK16,RPP38,WDR12,INTS2,FTSJ3,DDX56,NOP9,MRTO4,UTP4,WDR36,FBL,NHP2,UTP15,NIFK,RRP8,BYSL,NAF1,PA2G4,WDR43
GO:BP	ncRNA metabolic process	GO:0034660	1.94175e-20	54	RPF2,NOP14,RRS1,PUSL1,RRP12,FDXACB1,WDR4,METTL1,GAR1,PWP2,NAT10,RSL1D1,DIS3,PUS7,RRP7A,TSR1,RRP15,IMP4,INTS1,BOP1,NSUN6,VARS,EMG1,NOLC1,NOL6,NOP2,UTP20,TRMT1,EEF1E1,MAK16,RPP38,WDR12,INTS2,FTSJ3,DDX56,NOP9,MRTO4,UTP4,WDR36,FBL,NHP2,UTP15,NIFK,RRP8,BYSL,NAF1,PA2G4,WDR43,YARS,XPO5,DUS3L,FARSB,CPSF1,PDCD11
GO:BP	ribonucleoprotein complex biogenesis	GO:0022613	1.20255e-18	45	RPF2,WDR77,NOP14,RRS1,RRP12,FDXACB1,NIP7,GAR1,PWP2,NAT10,RSL1D1,DIS3,MYBBP1A,RRP7A,TSR1,RRP15,IMP4,BOP1,EMG1,NOP16,NOLC1,NOL6,NOP2,UTP20,MAK16,RPP38,WDR12,LTV1,FTSJ3,DDX56,NOP9,MRTO4,UTP4,WDR36,FBL,NHP2,UTP15,NIFK,RRP8,GEMIN5,BYSL,NAF1,PA2G4,RUVBL1,WDR43
GO:BP	RNA processing	GO:0006396	1.35683e-14	66	RPF2,CSDC2,WDR77,NOP14,RRS1,PUSL1,PABPC1L,RRP12,FDXACB1,WDR4,METTL1,GAR1,PWP2,NAT10,RSL1D1,DIS3,PUS7,IVNS1ABP,NCOR2,RRP7A,TSR1,RRP15,IMP4,AHCYL1,INTS1,BOP1,NSUN6,EMG1,NOLC1,NOL6,NOP2,UTP20,TRMT1,MAK16,RPP38,WDR12,INTS2,SCAF1,FTSJ3,DDX56,NOP9,MRTO4,UTP4,WDR36,FBL,NHP2,UTP15,NIFK,RRP8,GEMIN5,BYSL,NAF1,PA2G4,POLR2E,WDR43,SUGP2,GTF2H3,CHERP,DUS3L,MAP2K1,SNRNP40,CPSF1,SCAF4,PDCD11,SNRPA,ZPR1
GO:BP	ribosomal large subunit biogenesis	GO:0042273	1.18601e-09	14	RPF2,RRS1,NIP7,RSL1D1,RRP15,BOP1,NOP16,NOP2,MAK16,WDR12,FTSJ3,MRTO4,NHP2,NIFK
GO:BP	maturation of LSU-rRNA	GO:0000470	3.11006e-09	10	RPF2,RSL1D1,RRP15,BOP1,NOP2,MAK16,WDR12,FTSJ3,NHP2,NIFK
GO:BP	maturation of 5.8S rRNA	GO:0000460	3.26835e-07	9	NOP14,RRS1,RRP15,BOP1,UTP20,MAK16,WDR12,FTSJ3,NOP9
GO:BP	ribosomal small subunit biogenesis	GO:0042274	4.58372e-07	12	NOP14,RRS1,PWP2,NAT10,RRP7A,TSR1,EMG1,UTP20,LTV1,NOP9,UTP4,BYSL
GO:BP	rRNA modification	GO:0000154	2.02771e-06	9	FDXACB1,GAR1,NAT10,EMG1,NOP2,FTSJ3,FBL,NHP2,NAF1
GO:BP	maturation of 5.8S rRNA from tricistronic rRNA transcript (SSU-rRNA, 5.8S rRNA, LSU-rRNA)	GO:0000466	6.47776e-06	7	NOP14,RRS1,BOP1,UTP20,WDR12,FTSJ3,NOP9
GO:BP	endonucleolytic cleavage of tricistronic rRNA transcript (SSU-rRNA, 5.8S rRNA, LSU-rRNA)	GO:0000479	6.53715e-06	6	NOP14,RRS1,TSR1,BOP1,UTP20,NOP9
GO:BP	endonucleolytic cleavage involved in rRNA processing	GO:0000478	6.53715e-06	6	NOP14,RRS1,TSR1,BOP1,UTP20,NOP9
GO:BP	protein folding	GO:0006457	6.53715e-06	21	HSPA5,ERO1A,MLEC,SDF2L1,NGLY1,DNAJA4,CALR,FKBP4,GRPEL1,PDIA4,DNAJB11,HSPA13,HSPBP1,CCT6A,HSPB1,DNAJC25,CCT5,PFDN6,CANX,MESD,PDCD5
GO:BP	maturation of SSU-rRNA	GO:0030490	1.47702e-05	9	NOP14,RRS1,PWP2,NAT10,TSR1,UTP20,NOP9,UTP4,BYSL
GO:BP	maturation of SSU-rRNA from tricistronic rRNA transcript (SSU-rRNA, 5.8S rRNA, LSU-rRNA)	GO:0000462	1.72691e-05	8	NOP14,RRS1,PWP2,TSR1,UTP20,NOP9,UTP4,BYSL
GO:BP	cleavage involved in rRNA processing	GO:0000469	1.77153e-05	7	NOP14,RRS1,TSR1,BOP1,UTP20,NOP9,NHP2
GO:BP	RNA modification	GO:0009451	1.77153e-05	16	PUSL1,FDXACB1,WDR4,METTL1,GAR1,NAT10,PUS7,NSUN6,EMG1,NOP2,TRMT1,FTSJ3,FBL,NHP2,NAF1,DUS3L
GO:BP	vascular process in circulatory system	GO:0003018	3.63417e-05	17	APLN,COMP,SLC7A5,VEGFA,AKAP12,ABCC3,TFRC,NOS3,SLC38A1,AGTR1,SLC2A1,SNTA1,GPR4,SLC16A1,SLC29A1,SLC5A3,DOCK5
GO:BP	ribosome assembly	GO:0042255	8.95812e-05	10	RPF2,RRS1,NIP7,PWP2,RRP7A,BOP1,NOP2,MRTO4,MTERF3,MRPL20
GO:BP	response to topologically incorrect protein	GO:0035966	0.000243882	18	COMP,HYOU1,HSPA5,ERO1A,MANF,CCND1,SDF2L1,NGLY1,CALR,DNAJB11,HSPA13,HSPA4,SRPRB,GOSR2,HSPB1,CANX,EIF2S1,DAB2IP
GO:BP	maturation of LSU-rRNA from tricistronic rRNA transcript (SSU-rRNA, 5.8S rRNA, LSU-rRNA)	GO:0000463	0.000344501	5	RPF2,BOP1,WDR12,FTSJ3,NIFK
GO:BP	telomerase RNA localization	GO:0090672	0.000395383	6	NHP2,CCT6A,NAF1,RUVBL1,CCT5,WRAP53
GO:BP	RNA localization to Cajal body	GO:0090670	0.000395383	6	NHP2,CCT6A,NAF1,RUVBL1,CCT5,WRAP53
GO:BP	RNA localization to nucleus	GO:0090685	0.000395383	6	NHP2,CCT6A,NAF1,RUVBL1,CCT5,WRAP53
GO:BP	RNA methylation	GO:0001510	0.000395383	9	FDXACB1,WDR4,METTL1,NSUN6,EMG1,NOP2,TRMT1,FTSJ3,FBL
GO:BP	telomerase RNA localization to Cajal body	GO:0090671	0.000395383	6	NHP2,CCT6A,NAF1,RUVBL1,CCT5,WRAP53
GO:BP	endonucleolytic cleavage in ITS1 to separate SSU-rRNA from 5.8S rRNA and LSU-rRNA from tricistronic rRNA transcript (SSU-rRNA, 5.8S rRNA, LSU-rRNA)	GO:0000447	0.000558776	4	NOP14,RRS1,UTP20,NOP9
GO:BP	response to unfolded protein	GO:0006986	0.000706128	16	COMP,HYOU1,HSPA5,ERO1A,MANF,CCND1,CALR,DNAJB11,HSPA13,HSPA4,SRPRB,GOSR2,HSPB1,CANX,EIF2S1,DAB2IP
GO:BP	positive regulation of telomerase RNA localization to Cajal body	GO:1904874	0.00085359	5	NHP2,CCT6A,NAF1,RUVBL1,CCT5
GO:BP	positive regulation of cell migration by vascular endothelial growth factor signaling pathway	GO:0038089	0.000999485	4	VEGFA,KDR,HSPB1,MYO1C
GO:BP	pseudouridine synthesis	GO:0001522	0.00104003	5	PUSL1,GAR1,PUS7,NHP2,NAF1
GO:BP	tricarboxylic acid metabolic process	GO:0072350	0.00106976	4	CS,ACO1,IDH3A,IDH2
GO:BP	regulation of voltage-gated calcium channel activity	GO:1901385	0.00119349	4	CBARP,STAC3,STAC2,STAC
GO:BP	positive regulation of voltage-gated calcium channel activity	GO:1901387	0.00134494	3	STAC3,STAC2,STAC
GO:BP	circulatory system process	GO:0003013	0.00138457	24	CACNA1G,APLN,COMP,SLC7A5,VEGFA,AKAP12,FGF12,KCNG2,ABCC3,TFRC,NOS3,SLC38A1,AGTR1,ENPEP,SLC2A1,SNTA1,ATP1B3,AHCYL1,GPR4,SLC16A1,SLC29A1,SLC5A3,NEDD4L,DOCK5
GO:BP	ribosomal large subunit assembly	GO:0000027	0.00164363	6	RPF2,RRS1,BOP1,NOP2,MRTO4,MRPL20
GO:BP	regulation of telomerase RNA localization to Cajal body	GO:1904872	0.00186082	5	NHP2,CCT6A,NAF1,RUVBL1,CCT5
GO:BP	transport across blood-brain barrier	GO:0150104	0.00199541	8	SLC7A5,ABCC3,TFRC,SLC38A1,SLC2A1,SLC16A1,SLC29A1,SLC5A3
GO:BP	vascular transport	GO:0010232	0.00211912	8	SLC7A5,ABCC3,TFRC,SLC38A1,SLC2A1,SLC16A1,SLC29A1,SLC5A3
GO:BP	regulation of Ras protein signal transduction	GO:0046578	0.00234487	11	PSD2,GPR17,BCL6,SPRY4,SPRY1,PRAG1,SH2B2,RASGEF1A,GPR4,PSD3,RASGRF2
GO:BP	tRNA metabolic process	GO:0006399	0.00234487	14	PUSL1,WDR4,METTL1,NAT10,PUS7,NSUN6,VARS,TRMT1,EEF1E1,RPP38,YARS,DUS3L,FARSB,CPSF1
GO:BP	rRNA methylation	GO:0031167	0.00234487	5	FDXACB1,EMG1,NOP2,FTSJ3,FBL
GO:BP	rRNA 5'-end processing	GO:0000967	0.00234487	3	NOP14,UTP20,NOP9
GO:BP	endonucleolytic cleavage to generate mature 5'-end of SSU-rRNA from (SSU-rRNA, 5.8S rRNA, LSU-rRNA)	GO:0000472	0.00234487	3	NOP14,UTP20,NOP9
GO:BP	cellular response to topologically incorrect protein	GO:0035967	0.00329246	14	HYOU1,HSPA5,ERO1A,CCND1,SDF2L1,NGLY1,CALR,DNAJB11,HSPA13,SRPRB,GOSR2,CANX,EIF2S1,DAB2IP
GO:BP	tRNA (guanine-N7)-methylation	GO:0106004	0.00360465	2	WDR4,METTL1
GO:BP	musculoskeletal movement	GO:0050881	0.00360465	4	COMP,STAC3,STAC2,STAC
GO:BP	multicellular organismal movement	GO:0050879	0.00360465	4	COMP,STAC3,STAC2,STAC
GO:BP	cellular response to growth factor stimulus	GO:0071363	0.00380698	9	APLN,ONECUT2,COMP,ZFP36,SMPD3,VEGFA,HSPA5,SPRED3,FGF12
GO:BP	protein folding in endoplasmic reticulum	GO:0034975	0.00392726	4	HSPA5,ERO1A,CALR,CANX
GO:BP	ribonucleoprotein complex assembly	GO:0022618	0.00400071	15	RPF2,WDR77,RRS1,PWP2,RRP7A,BOP1,NOP2,MRTO4,GEMIN5,NAF1,RUVBL1,MRPL20,POLR2D,EIF3B,SNRPC
GO:BP	regulation of calcium ion-dependent exocytosis	GO:0017158	0.00444051	2	CACNA1G,CBARP
GO:BP	chaperone-mediated protein folding	GO:0061077	0.00447052	8	HSPA5,ERO1A,SDF2L1,FKBP4,PDIA4,HSPA13,HSPB1,PDCD5
GO:BP	response to growth factor	GO:0070848	0.00455485	9	APLN,ONECUT2,COMP,ZFP36,SMPD3,VEGFA,HSPA5,SPRED3,FGF12
GO:BP	positive regulation of endothelial cell chemotaxis by VEGF-activated vascular endothelial growth factor receptor signaling pathway	GO:0038033	0.00455485	3	VEGFA,KDR,HSPB1
GO:BP	response to endoplasmic reticulum stress	GO:0034976	0.00493127	19	HYOU1,HSPA5,ERO1A,MANF,CCND1,SDF2L1,NGLY1,ERLIN1,CALR,RASGRF2,PDIA4,DNAJB11,LPCAT3,SRPRB,GOSR2,CANX,TXNDC12,EIF2S1,DAB2IP
GO:BP	animal organ senescence	GO:0010260	0.00519801	2	COMP,ERO1A
GO:BP	rRNA base methylation	GO:0070475	0.00523024	3	FDXACB1,EMG1,NOP2
GO:BP	ribonucleoprotein complex subunit organization	GO:0071826	0.00523024	15	RPF2,WDR77,RRS1,PWP2,RRP7A,BOP1,NOP2,MRTO4,GEMIN5,NAF1,RUVBL1,MRPL20,POLR2D,EIF3B,SNRPC
GO:BP	tRNA modification	GO:0006400	0.00537779	7	PUSL1,WDR4,METTL1,NAT10,PUS7,NSUN6,TRMT1
GO:BP	endonucleolytic cleavage in 5'-ETS of tricistronic rRNA transcript (SSU-rRNA, 5.8S rRNA, LSU-rRNA)	GO:0000480	0.00570643	3	NOP14,UTP20,NOP9
GO:BP	cellular component biogenesis	GO:0044085	0.00598077	108	TUBA4A,ONECUT2,TRPM3,CLSTN2,SMPD3,VEGFA,HSPA5,RPF2,WDR77,KCNG2,NOP14,SDC4,TFRC,MDGA1,RRS1,NLRC3,SDK2,TENM4,LRFN4,UGDH,RRP12,FDXACB1,NDUFAF4,NIP7,GAR1,ABCA3,PWP2,NAT10,RSL1D1,DIS3,SLC2A1,MYBBP1A,RRP7A,TSR1,RRP15,IMP4,DNAJA4,BOP1,HIGD1A,EMG1,GRWD1,CALR,NOP16,NOLC1,NOL6,NOP2,UTP20,MAK16,FKBP4,RPP38,WDR12,LTV1,LPCAT3,FTSJ3,DDX56,NOP9,MRTO4,UTP4,WDR36,ASAP1,FBL,NHP2,TMEM126A,UTP15,NIFK,RRP8,GEMIN5,VCL…
GO:BP	RNA phosphodiester bond hydrolysis, endonucleolytic	GO:0090502	0.00620209	8	NOP14,RRS1,TSR1,BOP1,UTP20,RPP38,NOP9,ENDOV
GO:BP	endochondral bone morphogenesis	GO:0060350	0.00669988	3	PHOSPHO1,COMP,SMPD3
GO:BP	secretion by cell	GO:0032940	0.00763799	5	CACNA1G,TUBA4A,CBARP,APLN,IL1RN
GO:BP	regulation of localization	GO:0032879	0.00764396	24	CCL1,CACNA1G,CBARP,APLN,SAPCD2,ONECUT2,ZFP36,SMPD3,KCNAB3,VEGFA,FABP3,AKAP12,HSPA5,FGF12,CNKSR3,BCL6,STAC3,KCNG2,STAC2,STAC,SDC4,SLC51B,TFRC,NOS3
GO:BP	ribosome localization	GO:0033750	0.00770913	4	RRS1,LTV1,NOP9,ABCE1
GO:BP	vascular endothelial growth factor receptor-2 signaling pathway	GO:0036324	0.00770913	3	VEGFA,KDR,DAB2IP
GO:BP	ribosomal subunit export from nucleus	GO:0000054	0.00770913	4	RRS1,LTV1,NOP9,ABCE1
GO:BP	lactation	GO:0007595	0.00784596	6	APLN,VEGFA,CCND1,NCOR2,SLC29A1,UMPS
GO:BP	calcium-ion regulated exocytosis	GO:0017156	0.00859116	2	CACNA1G,CBARP
GO:BP	export from cell	GO:0140352	0.00859116	5	CACNA1G,TUBA4A,CBARP,APLN,IL1RN
GO:BP	vascular associated smooth muscle cell development	GO:0097084	0.00870758	2	COMP,VEGFA
GO:BP	ncRNA 5'-end processing	GO:0034471	0.00891013	4	NOP14,UTP20,RPP38,NOP9
GO:BP	cellular response to unfolded protein	GO:0034620	0.00891013	12	HYOU1,HSPA5,ERO1A,CCND1,CALR,DNAJB11,HSPA13,SRPRB,GOSR2,CANX,EIF2S1,DAB2IP
GO:BP	positive regulation of transport	GO:0051050	0.00891013	12	CACNA1G,APLN,SMPD3,VEGFA,FABP3,FGF12,CNKSR3,STAC3,STAC2,STAC,SDC4,SLC51B
GO:BP	positive regulation of protein localization to chromosome, telomeric region	GO:1904816	0.00891013	4	GNL3,CCT6A,CCT5,WRAP53
GO:BP	rRNA-containing ribonucleoprotein complex export from nucleus	GO:0071428	0.00900965	4	RRS1,LTV1,NOP9,ABCE1
GO:BP	endoplasmic reticulum unfolded protein response	GO:0030968	0.00902399	11	HYOU1,HSPA5,ERO1A,CCND1,CALR,DNAJB11,SRPRB,GOSR2,CANX,EIF2S1,DAB2IP
GO:BP	neuromuscular process	GO:0050905	0.00908603	5	COMP,FGF12,STAC3,STAC2,STAC
GO:BP	tRNA processing	GO:0008033	0.00944398	8	PUSL1,WDR4,METTL1,NAT10,PUS7,NSUN6,TRMT1,RPP38
GO:BP	response to nickel cation	GO:0010045	0.009566	1	CACNA1G
GO:BP	secretion	GO:0046903	0.00968792	5	CACNA1G,TUBA4A,CBARP,APLN,IL1RN
GO:BP	regulation of ERK1 and ERK2 cascade	GO:0070372	0.00968792	9	CCL1,VEGFA,AKAP12,SPRED3,CNKSR3,SPRY4,HCRTR1,SPRY1,NLRP6
GO:BP	negative regulation of ERK1 and ERK2 cascade	GO:0070373	0.0101313	5	SPRED3,CNKSR3,SPRY4,SPRY1,NLRP6
GO:BP	glycosaminoglycan biosynthetic process	GO:0006024	0.0112009	5	SMPD3,XYLT1,HS3ST2,SDC4,UGDH
GO:BP	RNA 5'-end processing	GO:0000966	0.0113331	4	NOP14,UTP20,RPP38,NOP9
GO:BP	regulation of biological quality	GO:0065008	0.0116905	54	AKAP1,CCL1,CACNA1G,APLN,CRHR2,IL1RN,ACOX2,COMP,CLSTN2,ZFP36,IL7R,SMPD3,SLC7A5,VEGFA,MYO5B,FABP3,AKAP12,GPR17,C7,FGF12,BCL6,RDH13,CSDC2,KCNG2,SLC51B,TFRC,MDGA1,NOS3,ABHD8,GOT1,HCRTR1,ERO1A,LRFN4,PRAG1,SH2B2,SLC38A1,SRCIN1,CCND1,AGTR1,GAR1,NLRP6,ABCA3,UBASH3B,ENPEP,NAT10,MAFF,PFKL,DIS3,ACO1,RAPGEF4,GNL3,SLC2A1,SNTA1,NCOR2
GO:BP	negative regulation of epithelial cell differentiation	GO:0030857	0.0119696	4	VEGFA,SPRED3,SPRY1,CCND1
GO:BP	positive regulation of cellular protein localization	GO:1903829	0.0119944	18	VEGFA,STAC3,STAC2,STAC,SLC51B,TFRC,GNL3,GLIS2,SLC5A3,CCT6A,MYO1C,MAVS,CCT5,ZPR1,MESD,PDCD5,WRAP53,HRAS
GO:BP	transmembrane transport	GO:0055085	0.0121747	31	CACNA1G,CBARP,SLC16A5,TMEM266,TRPM3,KCNAB3,SLC7A5,HSPA5,FGF12,STAC3,KCNG2,ABCC3,STAC2,STAC,SLC51B,ERO1A,SLC17A9,SLC38A1,SLC16A3,ATP5MC1,ABCA3,UBASH3B,ABCB9,SLC2A1,SNTA1,SVOPL,ATP1B3,SLC12A4,PPARD,AHCYL1,ERLIN1
GO:BP	RNA phosphodiester bond hydrolysis	GO:0090501	0.0128395	11	NOP14,RRS1,DIS3,TSR1,BOP1,UTP20,RPP38,NOP9,NHP2,ENDOV,CPSF1
GO:BP	regulation of protein localization to chromosome, telomeric region	GO:1904814	0.0131957	4	GNL3,CCT6A,CCT5,WRAP53
GO:BP	regulation of protein deacetylation	GO:0090311	0.0131957	3	VEGFA,SPRED3,BCL6
GO:BP	regulation of calcium ion transmembrane transporter activity	GO:1901019	0.0133923	4	CBARP,STAC3,STAC2,STAC
GO:BP	embryo implantation	GO:0007566	0.0133923	5	VEGFA,TEAD4,MST1,PPARD,CALR
GO:BP	aminoglycan biosynthetic process	GO:0006023	0.0133923	5	SMPD3,XYLT1,HS3ST2,SDC4,UGDH
GO:BP	ERK1 and ERK2 cascade	GO:0070371	0.0135664	9	CCL1,VEGFA,AKAP12,SPRED3,CNKSR3,SPRY4,HCRTR1,SPRY1,NLRP6
GO:BP	localization	GO:0051179	0.0138018	25	CCL1,CACNA1G,TUBA4A,CBARP,APLN,IL1RN,SAPCD2,SLC16A5,ACOX2,ONECUT2,MASP1,COMP,TMEM266,TRPM3,SSC4D,ZFP36,SMPD3,KCNAB3,SLC7A5,VEGFA,MYO5B,FABP3,HYOU1,AKAP12,HSPA5
GO:BP	protein hydroxylation	GO:0018126	0.0138018	3	P4HA1,PLOD2,ERO1A
GO:BP	negative regulation of fibroblast growth factor receptor signaling pathway	GO:0040037	0.0142847	3	APLN,SPRY4,SPRY1
GO:BP	response to magnesium ion	GO:0032026	0.0143623	4	SMPD3,CCND1,SLC41A1,ENTPD6
GO:BP	hormone transport	GO:0009914	0.0146601	12	APLN,IL1RN,SMPD3,SLC7A5,KCNG2,AGTR1,PFKL,RAPGEF4,SLC2A1,PPARD,SLC16A1,CRY1
GO:BP	aspartate family amino acid biosynthetic process	GO:0009067	0.0147083	3	GOT1,PLOD2,MRI1
GO:BP	cellular response to organic substance	GO:0071310	0.0147974	16	CCL1,APLN,CRHR2,IL1RN,ONECUT2,COMP,ZFP36,IL7R,SMPD3,VEGFA,HYOU1,AKAP12,HSPA5,GPR17,SPRED3,FGF12
GO:BP	positive regulation of calcium ion transmembrane transporter activity	GO:1901021	0.0147974	3	STAC3,STAC2,STAC
GO:BP	positive regulation of sodium ion transport	GO:0010765	0.0148829	4	FGF12,CNKSR3,ATP1B3,AHCYL1
GO:BP	cellular sodium ion homeostasis	GO:0006883	0.0148869	4	C7,ATP1B3,NEDD4L,ATP1A1
GO:BP	regulation of ion transmembrane transport	GO:0034765	0.0148869	8	CACNA1G,CBARP,KCNAB3,FGF12,STAC3,KCNG2,STAC2,STAC
GO:BP	striated muscle contraction	GO:0006941	0.0150747	5	CACNA1G,FGF12,STAC3,STAC2,STAC
GO:BP	protein targeting to mitochondrion	GO:0006626	0.0155727	9	TIMM9,TIMM8A,GRPEL1,TIMM50,HSPA4,TOMM5,TIMM13,PDCD5,TOMM20
GO:BP	tricarboxylic acid cycle	GO:0006099	0.0161078	4	CS,ACO1,IDH3A,IDH2
GO:BP	negative regulation of lens fiber cell differentiation	GO:1902747	0.0161078	2	SPRED3,SPRY1
GO:BP	N-terminal protein amino acid acetylation	GO:0006474	0.0172266	4	NAA40,NAA20,NAA50,NAA10
GO:BP	RNA localization	GO:0006403	0.0176519	14	ZFP36,NOL6,FBL,NHP2,CCT6A,NAF1,RUVBL1,XPO5,MYO1C,CCT5,CPSF1,POLR2D,TOMM20,WRAP53
GO:BP	skeletal muscle contraction	GO:0003009	0.0179783	3	STAC3,STAC2,STAC
GO:BP	rRNA pseudouridine synthesis	GO:0031118	0.0181423	3	GAR1,NHP2,NAF1
GO:BP	cell-cell adhesion via plasma-membrane adhesion molecules	GO:0098742	0.0181893	7	IL1RN,CLSTN2,MDGA1,PCDH12,SDK2,TENM4,LRFN4
GO:BP	cell-cell adhesion	GO:0098609	0.0191114	13	IL1RN,COMP,CLSTN2,IL7R,VEGFA,BCL6,SDC4,TFRC,MDGA1,PCDH12,SDK2,TENM4,LRFN4
GO:BP	cellular response to cytokine stimulus	GO:0071345	0.0192808	11	CCL1,IL1RN,ZFP36,IL7R,SMPD3,VEGFA,AKAP12,HSPA5,GPR17,BCL6,SPRY4
GO:BP	bone morphogenesis	GO:0060349	0.0194471	3	PHOSPHO1,COMP,SMPD3
GO:BP	cellular response to vascular endothelial growth factor stimulus	GO:0035924	0.0194749	8	VEGFA,ADAMTS12,MAPKAPK2,NUS1,KDR,HSPB1,MYO1C,DAB2IP
GO:BP	regulation of vesicle-mediated transport	GO:0060627	0.0195516	3	CACNA1G,CBARP,APLN
GO:BP	positive regulation of guanylate cyclase activity	GO:0031284	0.0195516	2	GUCA1A,NOS3
GO:BP	establishment of localization	GO:0051234	0.0198144	21	CACNA1G,TUBA4A,CBARP,APLN,IL1RN,SAPCD2,SLC16A5,MASP1,COMP,TMEM266,TRPM3,SSC4D,ZFP36,SMPD3,KCNAB3,SLC7A5,VEGFA,MYO5B,FABP3,HYOU1,HSPA5
GO:BP	regulation of cell communication	GO:0010646	0.0210063	29	CCL1,APLN,CRHR2,IL1RN,ONECUT2,PSD2,CLSTN2,IL7R,VEGFA,HYOU1,AKAP12,HSPA5,GPR17,SPRED3,FGF12,CNKSR3,BCL6,RPF2,GUCA1A,SPRY4,KCNG2,RGS16,TFRC,NOS3,RRS1,NLRC3,MDFI,GOT1,HCRTR1
GO:BP	citrate metabolic process	GO:0006101	0.0212492	2	CS,ACO1
GO:BP	regulation of cation channel activity	GO:2001257	0.0212492	5	CBARP,FGF12,STAC3,STAC2,STAC
GO:BP	regulation of protein kinase C signaling	GO:0090036	0.0212492	2	VEGFA,AKAP12
GO:BP	regulation of sodium ion transport	GO:0002028	0.0212492	7	FGF12,CNKSR3,SNTA1,ATP1B3,AHCYL1,NEDD4L,ATP1A1
GO:BP	regulation of transforming growth factor beta receptor signaling pathway	GO:0017015	0.0220884	5	ONECUT2,HSPA5,SPRED3,GOT1,SPRY1
GO:BP	nucleobase-containing compound metabolic process	GO:0006139	0.022263	142	APLN,UPP1,ONECUT2,NMRK2,ZFP36,IL7R,SMPD3,VEGFA,HSPA5,ACOT7,BCL6,RPF2,GUCA1A,CSDC2,WDR77,NOP14,TFRC,NOS3,RRS1,NLRC3,MAMSTR,MDFI,PUSL1,PABPC1L,UGDH,RRP12,FDXACB1,WDR4,CCND1,METTL1,ATP5MC1,GAR1,POLR3G,TEAD4,PWP2,NAT10,MAFF,PFKL,TAF4B,RSL1D1,DIS3,PUS7,GNL3,PPRC1,IVNS1ABP,GMPPB,NCOR2,MYBBP1A,RRP7A,NABP1,TSR1,RRP15,IMP4,PFAS,PPARD,GLIS2,AHCYL1,IDH2,INTS1,BOP1,HIGD1A,NSUN6,VARS,EMG1,CALR,PIM2,NOLC1,NOL6…
GO:BP	ion transport	GO:0006811	0.022263	15	CACNA1G,CBARP,SLC16A5,TRPM3,KCNAB3,SLC7A5,FGF12,CNKSR3,STAC3,KCNG2,ABCC3,STAC2,STAC,SLC51B,TFRC
GO:BP	regulation of signaling	GO:0023051	0.022263	29	CCL1,APLN,CRHR2,IL1RN,ONECUT2,PSD2,CLSTN2,IL7R,VEGFA,HYOU1,AKAP12,HSPA5,GPR17,SPRED3,FGF12,CNKSR3,BCL6,RPF2,GUCA1A,SPRY4,KCNG2,RGS16,TFRC,NOS3,RRS1,NLRC3,MDFI,GOT1,HCRTR1
GO:BP	xenobiotic transport	GO:0042908	0.022263	4	SLC7A5,ABCC3,ABCA3,SLC2A1
GO:BP	positive regulation of G protein-coupled receptor internalization	GO:1904022	0.022263	1	APLN
GO:BP	plasma membrane lactate transport	GO:0035879	0.022263	2	SLC16A3,SLC16A1
GO:BP	positive regulation of corticotropin-releasing hormone secretion	GO:0051466	0.022263	1	APLN
GO:BP	regulation of cellular response to transforming growth factor beta stimulus	GO:1903844	0.022263	5	ONECUT2,HSPA5,SPRED3,GOT1,SPRY1
GO:BP	positive regulation of interleukin-17 production	GO:0032740	0.022263	2	CCL1,SLC7A5
GO:BP	regulation of regulated secretory pathway	GO:1903305	0.022263	2	CACNA1G,CBARP
GO:BP	negative regulation of protein localization to cell cortex	GO:1904777	0.022263	1	SAPCD2
GO:BP	symmetric cell division	GO:0098725	0.022263	1	SAPCD2
GO:BP	regulation of secretion by cell	GO:1903530	0.022263	3	CACNA1G,CBARP,APLN
GO:BP	regulation of protein localization	GO:0032880	0.0224234	21	SAPCD2,VEGFA,STAC3,KCNG2,STAC2,STAC,SLC51B,TFRC,SRCIN1,PFKL,RSL1D1,RAPGEF4,GNL3,SLC2A1,CABP1,PPARD,GLIS2,IDH2,PKDCC,SLC16A1,NOLC1
GO:BP	chaperone cofactor-dependent protein refolding	GO:0051085	0.0224234	4	HSPA5,ERO1A,SDF2L1,HSPA13
GO:BP	cellular response to glucose starvation	GO:0042149	0.0224234	5	UPP1,HSPA5,SLC2A1,MYBBP1A,RRP8
GO:BP	regulation of ion transport	GO:0043269	0.0224234	9	CACNA1G,CBARP,KCNAB3,FGF12,CNKSR3,STAC3,KCNG2,STAC2,STAC
GO:BP	macromolecule localization	GO:0033036	0.0224234	93	IL1RN,SAPCD2,ACOX2,COMP,ZFP36,SMPD3,VEGFA,MYO5B,FABP3,HSPA5,BCL6,STAC3,RPF2,KCNG2,ABCC3,STAC2,STAC,SLC51B,TFRC,RRS1,NACAD,MDFI,SRCIN1,ARL5A,AGTR1,ABCA3,TIMM9,PFKL,ABCB9,RSL1D1,TIMM8A,RAPGEF4,GNL3,SLC2A1,ATP1B3,CABP1,PPARD,GLIS2,AHCYL1,IDH2,PKDCC,CALR,SLC16A1,NOLC1,NOL6,CRY1,GRPEL1,ARRDC3,PDIA4,LPCAT3,SLC5A3,NEDD4L,ATP11A,PIGW,FBL,NHP2,TIMM50,VCL,BYSL,HSPA4,SRPRB,GOSR2,SAR1B,CCT6A,ADAMTS9,NAF1,RUV…
GO:BP	regulation of lens fiber cell differentiation	GO:1902746	0.0224638	2	SPRED3,SPRY1
GO:BP	negative regulation of vascular permeability	GO:0043116	0.0227327	2	VEGFA,AKAP12
GO:BP	gene expression	GO:0010467	0.0227683	172	CCL1,APLN,ONECUT2,COMP,ZFP36,IL7R,SLC7A5,VEGFA,AKAP12,HSPA5,BCL6,RPF2,CSDC2,WDR77,NOP14,TFRC,NOS3,RRS1,NLRC3,MAMSTR,MDFI,ERO1A,PUSL1,PABPC1L,RRP12,FDXACB1,WDR4,CCND1,METTL1,GAR1,POLR3G,TEAD4,PWP2,ENPEP,NAT10,MAFF,TAF4B,RSL1D1,DIS3,PUS7,ACO1,MST1,GNL3,PPRC1,IVNS1ABP,NCOR2,MYBBP1A,RRP7A,NABP1,TSR1,RRP15,IMP4,PPARD,GLIS2,DNAJA4,AHCYL1,INTS1,BOP1,HIGD1A,NSUN6,VARS,EMG1,CALR,PIM2,NOLC1,NOL6,NOP2,UTP20…
GO:BP	snoRNA guided rRNA pseudouridine synthesis	GO:0000454	0.0236864	2	GAR1,NAF1
GO:BP	regulated exocytosis	GO:0045055	0.0238649	3	CACNA1G,TUBA4A,CBARP
GO:BP	RNA (guanine-N7)-methylation	GO:0036265	0.0238649	2	WDR4,METTL1
GO:BP	antiviral innate immune response	GO:0140374	0.0238649	1	AKAP1
GO:BP	Ras protein signal transduction	GO:0007265	0.0240891	12	PSD2,GPR17,BCL6,SPRY4,SPRY1,PRAG1,SH2B2,AGTR1,RASGEF1A,GPR4,PSD3,RASGRF2
GO:BP	negative regulation of response to stimulus	GO:0048585	0.0240891	13	APLN,CRHR2,IL1RN,ONECUT2,MASP1,ZFP36,IL7R,HYOU1,HSPA5,GPR17,SPRED3,CNKSR3,BCL6
GO:BP	calcium ion transmembrane transport	GO:0070588	0.0240891	6	CACNA1G,CBARP,TRPM3,STAC3,STAC2,STAC
GO:BP	bone mineralization	GO:0030282	0.024471	3	PHOSPHO1,COMP,SMPD3
GO:BP	animal organ development	GO:0048513	0.024471	30	CACNA1G,APLN,PHOSPHO1,SAPCD2,ONECUT2,COMP,ZFP36,IL7R,SMPD3,VEGFA,HSPA5,SPRED3,FGF12,XYLT1,BCL6,RDH13,STAC3,MTHFD1L,SPRY4,WDR77,SDC4,TFRC,MDGA1,NOS3,PCDH12,SPATA5,MDFI,SDK2,TENM4,ERO1A
GO:BP	membrane depolarization during AV node cell action potential	GO:0086045	0.024471	1	CACNA1G
GO:BP	replacement ossification	GO:0036075	0.024471	2	PHOSPHO1,SMPD3
GO:BP	membrane depolarization during SA node cell action potential	GO:0086046	0.024471	1	CACNA1G
GO:BP	regulation of secretion	GO:0051046	0.024471	3	CACNA1G,CBARP,APLN
GO:BP	tRNA pseudouridine synthesis	GO:0031119	0.024471	2	PUSL1,PUS7
GO:BP	endochondral ossification	GO:0001958	0.024471	2	PHOSPHO1,SMPD3
GO:BP	response to cytokine	GO:0034097	0.0247327	9	CCL1,IL1RN,ZFP36,IL7R,SMPD3,VEGFA,AKAP12,HSPA5,GPR17
GO:BP	body fluid secretion	GO:0007589	0.0250068	7	APLN,VEGFA,CCND1,NLRP6,NCOR2,SLC29A1,UMPS
GO:BP	primary metabolic process	GO:0044238	0.0250781	273	APLN,IL1RN,PHOSPHO1,UPP1,ACOX2,ONECUT2,NMRK2,ASPHD2,MASP1,COMP,ZFP36,IL7R,SMPD3,VEGFA,FABP3,HSPA5,SPRED3,P4HA1,XYLT1,CNKSR3,ACOT7,BCL6,RDH13,RPF2,GUCA1A,SPRY4,CSDC2,WDR77,CRELD2,NOP14,SDC4,SLC51B,TFRC,NOS3,PCDH12,ABHD8,RRS1,NLRC3,MAMSTR,MDFI,GOT1,PLOD2,ZFAND2A,ERO1A,PUSL1,PABPC1L,UGDH,SPRY1,PRAG1,SRCIN1,RRP12,CS,FDXACB1,WDR4,CCND1,AGTR1,METTL1,ATP5MC1,GAR1,MRI1,POLR3G,SMYD5,ABCA3,TEAD4,PWP2,UBASH…
GO:BP	hormone secretion	GO:0046879	0.0250781	11	APLN,IL1RN,SMPD3,KCNG2,AGTR1,PFKL,RAPGEF4,SLC2A1,PPARD,SLC16A1,CRY1
GO:BP	drug transmembrane transport	GO:0006855	0.0250781	2	ABCC3,ABCA3
GO:BP	regulation of protein localization to cell periphery	GO:1904375	0.0253299	4	SAPCD2,STAC3,STAC2,STAC
GO:BP	regulation of guanylate cyclase activity	GO:0031282	0.0255297	2	GUCA1A,NOS3
GO:BP	positive regulation of receptor internalization	GO:0002092	0.0258017	2	APLN,VEGFA
GO:BP	peptide transport	GO:0015833	0.0258017	10	APLN,IL1RN,SMPD3,KCNG2,PFKL,ABCB9,RAPGEF4,SLC2A1,PPARD,SLC16A1
GO:BP	organonitrogen compound biosynthetic process	GO:1901566	0.0258017	63	PHOSPHO1,UPP1,NMRK2,ZFP36,SMPD3,FABP3,XYLT1,ACOT7,HS3ST2,MTHFD1L,GUCA1A,SDC4,SLC51B,NOS3,GOT1,PLOD2,UGDH,ATP5MC1,MRI1,NAT10,DIS3,PUS7,ACO1,A4GALT,SDF2L1,PFAS,IDH2,VARS,CALR,NOLC1,CHST1,EEF1E1,NT5C3B,LPCAT3,SRM,ALG5,PIGW,PUM3,MRPL21,GEMIN5,EIF4A1,MRPL15,PA2G4,UMPS,DPH1,NUS1,YARS,PRMT1,HSPB1,ABCE1,FARSB,PLPP3,MRPL20,CERS2,PIGC,AASDHPPT,GSPT1,EIF2S1,CNOT9,POLR2D,EIF3B,MRPL52,EIF4E2
GO:BP	cellular response to fibroblast growth factor stimulus	GO:0044344	0.0258017	5	APLN,ZFP36,FGF12,SPRY4,SPRY1
GO:BP	negative regulation of transforming growth factor beta receptor signaling pathway	GO:0030512	0.0258017	3	ONECUT2,HSPA5,SPRED3
GO:BP	apelin receptor signaling pathway	GO:0060183	0.0260819	1	APLN
GO:BP	homeostatic process	GO:0042592	0.0260819	13	CCL1,CACNA1G,APLN,ACOX2,ZFP36,IL7R,VEGFA,MYO5B,FABP3,GPR17,C7,FGF12,BCL6
GO:BP	regulation of corticotropin-releasing hormone secretion	GO:0043397	0.0260819	1	APLN
GO:BP	bone growth	GO:0098868	0.0260819	2	COMP,SMPD3
GO:BP	corticotropin-releasing hormone secretion	GO:0043396	0.0260819	1	APLN
GO:BP	regulation of membrane depolarization	GO:0003254	0.0266252	3	CACNA1G,FGF12,GOT1
GO:BP	regulation of cellular protein localization	GO:1903827	0.0268237	25	SAPCD2,VEGFA,STAC3,STAC2,STAC,SLC51B,TFRC,GNL3,CABP1,GLIS2,PKDCC,NOLC1,SLC5A3,NEDD4L,BYSL,SAR1B,CCT6A,MYO1C,MAVS,CCT5,ZPR1,MESD,PDCD5,WRAP53,HRAS
GO:BP	positive regulation of establishment of protein localization to telomere	GO:1904851	0.0268237	3	CCT6A,CCT5,WRAP53
GO:BP	small GTPase mediated signal transduction	GO:0007264	0.0268237	16	PSD2,GPR17,BCL6,SPRY4,SPRY1,PRAG1,SH2B2,AGTR1,RASGEF1A,RAPGEF4,RHOBTB2,GPR4,PSD3,RASGRF2,RGL1,SH2D3C
GO:BP	tRNA methylation	GO:0030488	0.0268237	4	WDR4,METTL1,NSUN6,TRMT1
GO:BP	nucleolus organization	GO:0007000	0.0268237	2	EMG1,NOLC1
GO:BP	cartilage development involved in endochondral bone morphogenesis	GO:0060351	0.0268237	2	COMP,SMPD3
GO:BP	exocytosis	GO:0006887	0.0268237	3	CACNA1G,TUBA4A,CBARP
GO:BP	blood circulation	GO:0008015	0.0268237	8	CACNA1G,APLN,COMP,VEGFA,AKAP12,FGF12,KCNG2,NOS3
GO:BP	regulation of cell-matrix adhesion	GO:0001952	0.0268237	4	ONECUT2,VEGFA,BCL6,SDC4
GO:BP	chondrocyte development	GO:0002063	0.0268237	2	COMP,SMPD3
GO:BP	transport	GO:0006810	0.0268237	20	CACNA1G,TUBA4A,CBARP,APLN,IL1RN,SLC16A5,MASP1,COMP,TMEM266,TRPM3,SSC4D,ZFP36,SMPD3,KCNAB3,SLC7A5,VEGFA,MYO5B,FABP3,HYOU1,HSPA5
GO:BP	uridine metabolic process	GO:0046108	0.0268237	1	UPP1
GO:BP	negative regulation of intracellular steroid hormone receptor signaling pathway	GO:0033144	0.0268237	5	NCOR2,CALR,CRY1,PHB,CNOT9
GO:BP	cation transmembrane transport	GO:0098655	0.0268237	10	CACNA1G,CBARP,TRPM3,KCNAB3,SLC7A5,FGF12,STAC3,KCNG2,STAC2,STAC
GO:BP	cellular nitrogen compound metabolic process	GO:0034641	0.0268237	180	APLN,UPP1,ONECUT2,NMRK2,ZFP36,IL7R,SMPD3,VEGFA,HSPA5,ACOT7,BCL6,MTHFD1L,RPF2,GUCA1A,CSDC2,WDR77,NOP14,TFRC,NOS3,RRS1,NLRC3,MAMSTR,MDFI,PUSL1,PABPC1L,UGDH,RRP12,FDXACB1,WDR4,CCND1,METTL1,ATP5MC1,GAR1,POLR3G,TEAD4,PWP2,ENPEP,NAT10,MAFF,PFKL,TAF4B,RSL1D1,DIS3,PUS7,ACO1,GNL3,PPRC1,IVNS1ABP,GMPPB,NCOR2,MYBBP1A,RRP7A,NABP1,TSR1,RRP15,IMP4,PFAS,PPARD,GLIS2,AHCYL1,IDH2,INTS1,BOP1,HIGD1A,NSUN6,VARS,EMG1,C…
GO:BP	response to organic substance	GO:0010033	0.0268237	17	CCL1,APLN,CRHR2,IL1RN,ONECUT2,COMP,ZFP36,IL7R,SMPD3,VEGFA,FABP3,HYOU1,AKAP12,HSPA5,GPR17,SPRED3,FGF12
GO:BP	regulation of transmembrane transport	GO:0034762	0.0268237	8	CACNA1G,CBARP,KCNAB3,FGF12,STAC3,KCNG2,STAC2,STAC
GO:BP	uridine catabolic process	GO:0006218	0.0268237	1	UPP1
GO:BP	establishment of protein localization to mitochondrion	GO:0072655	0.0268237	10	TIMM9,TIMM8A,GRPEL1,TIMM50,HSPA4,HK1,TOMM5,TIMM13,PDCD5,TOMM20
GO:BP	collagen-activated tyrosine kinase receptor signaling pathway	GO:0038063	0.0268237	3	UBASH3B,COL4A2,COL4A1
GO:BP	response to fibroblast growth factor	GO:0071774	0.0268237	5	APLN,ZFP36,FGF12,SPRY4,SPRY1
GO:BP	protein maturation	GO:0051604	0.0268237	16	COMP,ERO1A,ENPEP,CALR,DNAJB11,LPCAT3,NAA40,ADAM19,SPCS3,NAA20,CIAO2B,BACE1,MYH9,NAA50,NAA10,RCE1
GO:BP	regulation of fibroblast growth factor receptor signaling pathway	GO:0040036	0.0268237	3	APLN,SPRY4,SPRY1
GO:BP	positive regulation of histone deacetylation	GO:0031065	0.0268237	2	VEGFA,BCL6
GO:BP	peptidyl-proline hydroxylation to 4-hydroxy-L-proline	GO:0018401	0.0268237	2	P4HA1,ERO1A
GO:BP	transmembrane receptor protein serine/threonine kinase signaling pathway	GO:0007178	0.0269871	5	ONECUT2,COMP,SMPD3,HSPA5,SPRED3
GO:BP	positive regulation of transcription from RNA polymerase II promoter in response to stress	GO:0036003	0.0269871	2	VEGFA,HSPA5
GO:BP	eye photoreceptor cell differentiation	GO:0001754	0.027227	3	VEGFA,RDH13,SDK2
GO:BP	regulation of cell-substrate adhesion	GO:0010810	0.0275117	5	ONECUT2,VEGFA,BCL6,SPRY4,SDC4
GO:BP	RNA metabolic process	GO:0016070	0.0275117	122	APLN,ONECUT2,ZFP36,VEGFA,HSPA5,BCL6,RPF2,CSDC2,WDR77,NOP14,TFRC,RRS1,NLRC3,MAMSTR,MDFI,PUSL1,PABPC1L,RRP12,FDXACB1,WDR4,CCND1,METTL1,GAR1,POLR3G,TEAD4,PWP2,NAT10,MAFF,TAF4B,RSL1D1,DIS3,PUS7,GNL3,PPRC1,IVNS1ABP,NCOR2,MYBBP1A,RRP7A,NABP1,TSR1,RRP15,IMP4,PPARD,GLIS2,AHCYL1,INTS1,BOP1,HIGD1A,NSUN6,VARS,EMG1,CALR,PIM2,NOLC1,NOL6,NOP2,UTP20,TRMT1,TRIM16,CRY1,EEF1E1,MAK16,ECM1,RPP38,WDR12,NT5C3B,INTS2,S…
GO:BP	ossification involved in bone maturation	GO:0043931	0.0275117	2	PHOSPHO1,XYLT1
GO:BP	glycosaminoglycan metabolic process	GO:0030203	0.0275117	5	SMPD3,XYLT1,HS3ST2,SDC4,UGDH
GO:BP	'de novo' posttranslational protein folding	GO:0051084	0.0275117	4	HSPA5,ERO1A,SDF2L1,HSPA13
GO:BP	regulation of epithelial cell differentiation	GO:0030856	0.0279392	6	ZFP36,VEGFA,SPRED3,SPRY1,CCND1,MAFF
GO:BP	regulation of exocytosis	GO:0017157	0.0282259	2	CACNA1G,CBARP
GO:BP	regulation of body fluid levels	GO:0050878	0.0282331	11	AKAP1,APLN,COMP,VEGFA,MYO5B,NOS3,SH2B2,CCND1,NLRP6,UBASH3B,MAFF
GO:BP	positive regulation of exosomal secretion	GO:1903543	0.0282331	2	SMPD3,SDC4
GO:BP	telomere maintenance via telomerase	GO:0007004	0.0282657	7	GAR1,NAT10,NHP2,CCT6A,NAF1,CCT5,WRAP53
GO:BP	positive regulation of protein localization to plasma membrane	GO:1903078	0.0282657	3	STAC3,STAC2,STAC
GO:BP	regulation of G protein-coupled receptor internalization	GO:1904020	0.0285184	1	APLN
GO:BP	protein localization to nucleolus	GO:1902570	0.0287205	3	RPF2,RRS1,BYSL
GO:BP	isocitrate metabolic process	GO:0006102	0.0287205	2	IDH3A,IDH2
GO:BP	vascular endothelial growth factor signaling pathway	GO:0038084	0.0287205	6	VEGFA,NUS1,KDR,HSPB1,MYO1C,DAB2IP
GO:BP	muscle contraction	GO:0006936	0.0288029	6	CACNA1G,COMP,FGF12,STAC3,STAC2,STAC
GO:BP	positive regulation of protein localization to membrane	GO:1905477	0.028813	4	STAC3,STAC2,STAC,SLC51B
GO:BP	embryonic hemopoiesis	GO:0035162	0.0296477	4	VEGFA,CCDC134,KDR,SH2B3
GO:BP	protein localization to mitochondrion	GO:0070585	0.0296477	10	TIMM9,TIMM8A,GRPEL1,TIMM50,HSPA4,HK1,TOMM5,TIMM13,PDCD5,TOMM20
GO:BP	bone development	GO:0060348	0.0298403	4	PHOSPHO1,COMP,SMPD3,XYLT1
GO:BP	intracellular signal transduction	GO:0035556	0.0298403	27	CCL1,PSD2,ZFP36,SMPD3,VEGFA,HYOU1,AKAP12,GPR17,SPRED3,FGF12,CNKSR3,BCL6,STAC3,RPF2,GUCA1A,SPRY4,STAC2,STAC,TFRC,NOS3,RRS1,NLRC3,HCRTR1,ERO1A,SPRY1,PRAG1,SH2B2
GO:BP	regulation of deadenylation-independent decapping of nuclear-transcribed mRNA	GO:1901834	0.0298654	1	ZFP36
GO:BP	inorganic cation transmembrane transport	GO:0098662	0.0298654	9	CACNA1G,CBARP,TRPM3,KCNAB3,FGF12,STAC3,KCNG2,STAC2,STAC
GO:BP	regulation of cell-cell adhesion	GO:0022407	0.0298654	7	IL1RN,IL7R,VEGFA,BCL6,SDC4,TFRC,MDGA1
GO:BP	SA node cell action potential	GO:0086015	0.0298654	1	CACNA1G
GO:BP	negative regulation of polynucleotide adenylyltransferase activity	GO:1904246	0.0298654	1	ZFP36
GO:BP	regulation of cellular response to growth factor stimulus	GO:0090287	0.0298654	7	APLN,ONECUT2,HSPA5,SPRED3,SPRY4,GOT1,SPRY1
GO:BP	SA node cell to atrial cardiac muscle cell signaling	GO:0086018	0.0298654	1	CACNA1G
GO:BP	positive regulation of deadenylation-independent decapping of nuclear-transcribed mRNA	GO:1901835	0.0298654	1	ZFP36
GO:BP	drug transport	GO:0015893	0.0298654	2	ABCC3,ABCA3
GO:BP	establishment of protein localization to organelle	GO:0072594	0.0298654	23	HSPA5,TIMM9,TIMM8A,CABP1,NOLC1,GRPEL1,TIMM50,HSPA4,SRPRB,GOSR2,CCT6A,SPCS3,MAVS,CCT5,HK1,HGS,TOMM5,ZPR1,TIMM13,PDCD5,TOMM20,WRAP53,HIKESHI
GO:BP	regulation of establishment of protein localization to telomere	GO:0070203	0.0298654	3	CCT6A,CCT5,WRAP53
GO:BP	cation transport	GO:0006812	0.0298654	12	CACNA1G,CBARP,TRPM3,KCNAB3,SLC7A5,FGF12,CNKSR3,STAC3,KCNG2,STAC2,STAC,TFRC
GO:BP	RNA-dependent DNA biosynthetic process	GO:0006278	0.0298654	7	GAR1,NAT10,NHP2,CCT6A,NAF1,CCT5,WRAP53
GO:BP	regulation of small GTPase mediated signal transduction	GO:0051056	0.0298654	11	PSD2,GPR17,BCL6,SPRY4,SPRY1,PRAG1,SH2B2,RASGEF1A,GPR4,PSD3,RASGRF2
GO:BP	response to endogenous stimulus	GO:0009719	0.0298654	11	APLN,CRHR2,IL1RN,ONECUT2,COMP,ZFP36,SMPD3,FABP3,HSPA5,SPRED3,FGF12
GO:BP	chemical homeostasis	GO:0048878	0.0304547	14	CCL1,CACNA1G,ACOX2,VEGFA,MYO5B,FABP3,GPR17,C7,FGF12,TFRC,ABHD8,GOT1,HCRTR1,ERO1A
GO:BP	AV node cell action potential	GO:0086016	0.0306005	1	CACNA1G
GO:BP	sodium ion transport	GO:0006814	0.0306005	10	CACNA1G,FGF12,CNKSR3,SLC38A1,SNTA1,ATP1B3,AHCYL1,SLC5A3,NEDD4L,SLC41A1
GO:BP	dTMP catabolic process	GO:0046074	0.0306005	1	UPP1
GO:BP	positive regulation of mammary gland epithelial cell proliferation	GO:0033601	0.0306005	2	CCND1,MST1
GO:BP	bone maturation	GO:0070977	0.0306005	2	PHOSPHO1,XYLT1
GO:BP	protein insertion into mitochondrial inner membrane	GO:0045039	0.0306005	3	TIMM9,TIMM8A,TIMM13
GO:BP	AV node cell to bundle of His cell signaling	GO:0086027	0.0306005	1	CACNA1G
GO:BP	regulation of atrial cardiac muscle cell membrane depolarization	GO:0060371	0.0306005	1	CACNA1G
GO:BP	ion transmembrane transport	GO:0034220	0.0306005	11	CACNA1G,CBARP,TRPM3,KCNAB3,SLC7A5,FGF12,STAC3,KCNG2,ABCC3,STAC2,STAC
GO:BP	sinoatrial node development	GO:0003163	0.0306005	1	CACNA1G
GO:BP	polysaccharide transport	GO:0015774	0.0306005	1	SMPD3
GO:BP	dicarboxylic acid biosynthetic process	GO:0043650	0.0306005	2	MTHFD1L,GOT1
GO:BP	positive regulation of corticotropin secretion	GO:0051461	0.0306005	1	APLN
GO:BP	regulation of exosomal secretion	GO:1903541	0.0306093	2	SMPD3,SDC4
GO:BP	peptide hormone secretion	GO:0030072	0.0308998	9	APLN,IL1RN,SMPD3,KCNG2,PFKL,RAPGEF4,SLC2A1,PPARD,SLC16A1
GO:BP	heterocycle metabolic process	GO:0046483	0.0311632	143	APLN,UPP1,ONECUT2,NMRK2,ZFP36,IL7R,SMPD3,VEGFA,HSPA5,ACOT7,BCL6,MTHFD1L,RPF2,GUCA1A,CSDC2,WDR77,NOP14,TFRC,NOS3,RRS1,NLRC3,MAMSTR,MDFI,PUSL1,PABPC1L,UGDH,RRP12,FDXACB1,WDR4,CCND1,METTL1,ATP5MC1,GAR1,POLR3G,TEAD4,PWP2,NAT10,MAFF,PFKL,TAF4B,RSL1D1,DIS3,PUS7,GNL3,PPRC1,IVNS1ABP,GMPPB,NCOR2,MYBBP1A,RRP7A,NABP1,TSR1,RRP15,IMP4,PFAS,PPARD,GLIS2,AHCYL1,IDH2,INTS1,BOP1,HIGD1A,NSUN6,VARS,EMG1,CALR,PIM2,NO…
GO:BP	positive regulation of protein localization to cell periphery	GO:1904377	0.0317699	3	STAC3,STAC2,STAC
GO:BP	positive regulation of protein kinase D signaling	GO:1903572	0.0317699	1	VEGFA
GO:BP	basophil chemotaxis	GO:0002575	0.0317699	1	VEGFA
GO:BP	regulation of protein kinase D signaling	GO:1903570	0.0317699	1	VEGFA
GO:BP	regulation of transport	GO:0051049	0.0318437	33	CACNA1G,CBARP,APLN,SMPD3,KCNAB3,VEGFA,FABP3,FGF12,CNKSR3,STAC3,KCNG2,STAC2,STAC,SDC4,SLC51B,SRCIN1,AGTR1,NLRP6,ABCA3,UBASH3B,PFKL,RAPGEF4,SLC2A1,SNTA1,ATP1B3,CABP1,PPARD,AHCYL1,IDH2,PKDCC,CALR,SLC16A1,NOLC1
GO:BP	organic cyclic compound metabolic process	GO:1901360	0.0318889	149	APLN,UPP1,ACOX2,ONECUT2,NMRK2,ZFP36,IL7R,SMPD3,VEGFA,HSPA5,ACOT7,BCL6,MTHFD1L,RPF2,GUCA1A,CSDC2,WDR77,NOP14,TFRC,NOS3,RRS1,NLRC3,MAMSTR,MDFI,PUSL1,PABPC1L,UGDH,RRP12,FDXACB1,WDR4,CCND1,AGTR1,METTL1,ATP5MC1,GAR1,POLR3G,TEAD4,PWP2,NAT10,MAFF,PFKL,TAF4B,RSL1D1,DIS3,PUS7,GNL3,PPRC1,IVNS1ABP,GMPPB,NCOR2,MYBBP1A,RRP7A,NABP1,TSR1,RRP15,IMP4,PFAS,PPARD,GLIS2,AHCYL1,IDH2,ERLIN1,INTS1,BOP1,HIGD1A,NSUN6,VAR…
GO:BP	aminoglycan metabolic process	GO:0006022	0.0319465	5	SMPD3,XYLT1,HS3ST2,SDC4,UGDH
GO:BP	positive regulation of protein deacetylation	GO:0090312	0.0321541	2	VEGFA,BCL6
GO:BP	'de novo' protein folding	GO:0006458	0.0321541	4	HSPA5,ERO1A,SDF2L1,HSPA13
GO:BP	protein kinase C signaling	GO:0070528	0.0321541	2	VEGFA,AKAP12
GO:BP	SA node cell to atrial cardiac muscle cell communication	GO:0086070	0.0321541	1	CACNA1G
GO:BP	S-adenosylmethionine cycle	GO:0033353	0.0322275	2	MRI1,AHCYL1
GO:BP	regulation of phosphatidylcholine metabolic process	GO:0150172	0.0329173	2	FABP3,ABCA3
GO:BP	cellular response to corticotropin-releasing hormone stimulus	GO:0071376	0.0333803	1	CRHR2
GO:BP	response to corticotropin-releasing hormone	GO:0043435	0.0333803	1	CRHR2
GO:BP	peptide secretion	GO:0002790	0.0335773	9	APLN,IL1RN,SMPD3,KCNG2,PFKL,RAPGEF4,SLC2A1,PPARD,SLC16A1
GO:BP	regulation of corticotropin secretion	GO:0051459	0.0335773	1	APLN
GO:BP	positive regulation of hepatic stellate cell migration	GO:0061870	0.0335773	1	AKAP12
GO:BP	positive regulation of oligodendrocyte apoptotic process	GO:1900143	0.0335773	1	AKAP12
GO:BP	protein localization to nuclear body	GO:1903405	0.0335773	3	CCT6A,CCT5,WRAP53
GO:BP	regulation of cell adhesion	GO:0030155	0.0335773	9	IL1RN,ONECUT2,IL7R,VEGFA,BCL6,SPRY4,SDC4,TFRC,MDGA1
GO:BP	signal transduction by p53 class mediator	GO:0072331	0.0335773	13	SPRED3,RPF2,RRS1,TAF4B,MYBBP1A,BOP1,NOP2,EEF1E1,AEN,RRP8,USP10,E2F4,PRMT1
GO:BP	system process	GO:0003008	0.0335773	18	CACNA1G,APLN,COMP,TRPM3,SLC7A5,VEGFA,MYO5B,AKAP12,FGF12,STAC3,GUCA1A,KCNG2,ABCC3,RGS16,STAC2,STAC,TFRC,NOS3
GO:BP	regulation of establishment of protein localization to chromosome	GO:0070202	0.0335773	3	CCT6A,CCT5,WRAP53
GO:BP	protein localization to Cajal body	GO:1904867	0.0335773	3	CCT6A,CCT5,WRAP53
GO:BP	regulation of protein folding in endoplasmic reticulum	GO:0060904	0.0339944	1	HSPA5
GO:BP	muscle system process	GO:0003012	0.0341789	7	CACNA1G,COMP,FGF12,STAC3,STAC2,STAC,NOS3
GO:BP	cellular component organization or biogenesis	GO:0071840	0.0345885	185	TUBA4A,APLN,TUBA8,SAPCD2,ONECUT2,COMP,TRPM3,CLSTN2,IL7R,SMPD3,VEGFA,MYO5B,HSPA5,P4HA1,BCL6,RPF2,WDR77,KCNG2,NOP14,SDC4,TFRC,MDGA1,NOS3,RRS1,NLRC3,SDK2,PLOD2,TENM4,ERO1A,MANF,PABPC1L,LRFN4,UGDH,SPRY1,PRAG1,SH2B2,SRCIN1,RRP12,FDXACB1,AGTR1,NDUFAF4,NIP7,ATP5MC1,GAR1,SMYD5,ABCA3,PWP2,NAT10,TIMM9,RSL1D1,DIS3,TIMM8A,GNL3,SLC2A1,PPRC1,SNTA1,MYBBP1A,RRP7A,A4GALT,TSR1,RRP15,IMP4,SLC12A4,PPARD,DNAJA4,AHCYL…
GO:BP	immune response	GO:0006955	0.0345885	5	AKAP1,CCL1,APLN,CRHR2,IL1RN
GO:BP	eosinophil chemotaxis	GO:0048245	0.0345885	1	CCL1
GO:BP	regulation of cation transmembrane transport	GO:1904062	0.0345885	6	CBARP,KCNAB3,FGF12,STAC3,STAC2,STAC
GO:BP	positive regulation of endothelial cell chemotaxis	GO:2001028	0.0345895	3	VEGFA,KDR,HSPB1
GO:BP	regulation of Rho protein signal transduction	GO:0035023	0.0347369	6	GPR17,BCL6,PRAG1,GPR4,RASGRF2,TNFAIP1
GO:BP	positive regulation of calcium ion transmembrane transport	GO:1904427	0.0347369	3	STAC3,STAC2,STAC
GO:BP	animal organ maturation	GO:0048799	0.0347369	2	PHOSPHO1,XYLT1
GO:BP	AV node cell to bundle of His cell communication	GO:0086067	0.0347369	1	CACNA1G
GO:BP	CMP metabolic process	GO:0046035	0.0350247	1	UPP1
GO:BP	CMP catabolic process	GO:0006248	0.0350247	1	UPP1
GO:BP	cardiac muscle cell action potential involved in contraction	GO:0086002	0.0350247	5	CACNA1G,FGF12,SNTA1,NEDD4L,ATP1A1
GO:BP	positive regulation of monocyte chemotaxis	GO:0090026	0.0350247	1	CCL1
GO:BP	negative regulation of Ras protein signal transduction	GO:0046580	0.0350247	3	BCL6,SPRY4,SPRY1
GO:BP	cellular response to manganese ion	GO:0071287	0.0350682	3	HSPA5,BACE1,EIF2S1
GO:BP	biomineral tissue development	GO:0031214	0.0352119	3	PHOSPHO1,COMP,SMPD3
GO:BP	negative regulation of vasoconstriction	GO:0045906	0.0355441	1	APLN
GO:BP	biomineralization	GO:0110148	0.0355441	3	PHOSPHO1,COMP,SMPD3
GO:BP	collagen-activated signaling pathway	GO:0038065	0.0355441	3	UBASH3B,COL4A2,COL4A1
GO:BP	exosomal secretion	GO:1990182	0.0355441	2	SMPD3,SDC4
GO:BP	regulation of calcium ion transmembrane transport	GO:1903169	0.0355441	4	CBARP,STAC3,STAC2,STAC
GO:BP	corticotropin secretion	GO:0051458	0.0355441	1	APLN
GO:BP	protein deacetylation	GO:0006476	0.0355441	3	VEGFA,SPRED3,BCL6
GO:BP	positive regulation of cation channel activity	GO:2001259	0.0355441	3	STAC3,STAC2,STAC
GO:BP	cellular aromatic compound metabolic process	GO:0006725	0.0358864	143	APLN,UPP1,ONECUT2,NMRK2,ZFP36,IL7R,SMPD3,VEGFA,HSPA5,ACOT7,BCL6,MTHFD1L,RPF2,GUCA1A,CSDC2,WDR77,NOP14,TFRC,NOS3,RRS1,NLRC3,MAMSTR,MDFI,PUSL1,PABPC1L,UGDH,RRP12,FDXACB1,WDR4,CCND1,METTL1,ATP5MC1,GAR1,POLR3G,TEAD4,PWP2,NAT10,MAFF,PFKL,TAF4B,RSL1D1,DIS3,PUS7,GNL3,PPRC1,IVNS1ABP,GMPPB,NCOR2,MYBBP1A,RRP7A,NABP1,TSR1,RRP15,IMP4,PFAS,PPARD,GLIS2,AHCYL1,IDH2,INTS1,BOP1,HIGD1A,NSUN6,VARS,EMG1,CALR,PIM2,NO…
GO:BP	nucleocytoplasmic transport	GO:0006913	0.0360848	17	RRS1,CABP1,AHCYL1,CALR,NOLC1,NOL6,LTV1,NOP9,GEMIN5,STYX,ABCE1,XPO5,MAVS,CPSF1,ZPR1,POLR2D,HIKESHI
GO:BP	negative regulation of immune response	GO:0050777	0.0360848	5	CRHR2,MASP1,IL7R,GPR17,BCL6
GO:BP	sodium ion homeostasis	GO:0055078	0.0360848	5	C7,AGTR1,ATP1B3,NEDD4L,ATP1A1
GO:BP	multi-multicellular organism process	GO:0044706	0.0360848	8	VEGFA,SLC38A1,TEAD4,MAFF,MST1,SLC2A1,PPARD,CALR
GO:BP	phosphatidylcholine biosynthetic process	GO:0006656	0.0360848	2	PHOSPHO1,FABP3
GO:BP	nucleotide-sugar biosynthetic process	GO:0009226	0.0360848	3	UGDH,GMPPB,GNPNAT1
GO:BP	negative regulation of calcium ion-dependent exocytosis	GO:0045955	0.0360848	1	CBARP
GO:BP	brown fat cell differentiation	GO:0050873	0.0360848	3	FABP3,ERO1A,SH2B2
GO:BP	endocrine process	GO:0050886	0.0360848	5	APLN,NOS3,AGTR1,ENPEP,CRY1
GO:BP	palmitic acid metabolic process	GO:1900533	0.0360848	1	ACOT7
GO:BP	peptidyl-proline hydroxylation	GO:0019511	0.0360848	2	P4HA1,ERO1A
GO:BP	protein localization to nucleus	GO:0034504	0.0360848	15	RPF2,TFRC,RRS1,CABP1,GLIS2,CALR,NOLC1,BYSL,CCT6A,MAVS,CCT5,ZPR1,CIZ1,WRAP53,HIKESHI
GO:BP	long-chain fatty-acyl-CoA catabolic process	GO:0036116	0.0360848	1	ACOT7
GO:BP	glucocorticoid receptor signaling pathway	GO:0042921	0.0360848	3	CALR,CRY1,PHB
GO:BP	palmitic acid biosynthetic process	GO:1900535	0.0360848	1	ACOT7
GO:BP	regulation of systemic arterial blood pressure by hormone	GO:0001990	0.0360848	3	NOS3,AGTR1,ENPEP
GO:BP	amide transport	GO:0042886	0.0360848	10	APLN,IL1RN,SMPD3,KCNG2,PFKL,ABCB9,RAPGEF4,SLC2A1,PPARD,SLC16A1
GO:BP	regulation of protein localization to nucleus	GO:1900180	0.0361071	9	TFRC,CABP1,GLIS2,NOLC1,BYSL,CCT6A,MAVS,CCT5,ZPR1
GO:BP	inorganic ion transmembrane transport	GO:0098660	0.0361309	9	CACNA1G,CBARP,TRPM3,KCNAB3,FGF12,STAC3,KCNG2,STAC2,STAC
GO:BP	negative regulation of nuclear cell cycle DNA replication	GO:1902576	0.0361372	1	BCL6
GO:BP	negative regulation of mitotic cell cycle DNA replication	GO:1903464	0.0361372	1	BCL6
GO:BP	nucleic acid phosphodiester bond hydrolysis	GO:0090305	0.0361372	15	ZFP36,NOP14,RRS1,DIS3,TSR1,BOP1,UTP20,AEN,RPP38,NOP9,NHP2,GTF2H3,ENDOV,CPSF1,G3BP1
GO:BP	eosinophil migration	GO:0072677	0.0361372	1	CCL1
GO:BP	extracellular exosome biogenesis	GO:0097734	0.0361372	2	SMPD3,SDC4
GO:BP	negative regulation of immune effector process	GO:0002698	0.0361372	3	MASP1,IL7R,BCL6
GO:BP	methylation	GO:0032259	0.0367891	17	FDXACB1,WDR4,METTL1,SMYD5,NSUN6,EMG1,NOP2,TRMT1,FTSJ3,FBL,RRP8,CARNMT1,PRDM2,PRMT1,PRMT3,MAT2A,GSPT1
GO:BP	interleukin-17 production	GO:0032620	0.0367891	2	CCL1,SLC7A5
GO:BP	pyrimidine nucleotide salvage	GO:0032262	0.0367891	1	UPP1
GO:BP	vascular associated smooth muscle cell differentiation	GO:0035886	0.0367891	2	COMP,VEGFA
GO:BP	nuclear transport	GO:0051169	0.0367891	17	RRS1,CABP1,AHCYL1,CALR,NOLC1,NOL6,LTV1,NOP9,GEMIN5,STYX,ABCE1,XPO5,MAVS,CPSF1,ZPR1,POLR2D,HIKESHI
GO:BP	neuronal action potential	GO:0019228	0.0367891	2	CACNA1G,FGF12
GO:BP	skeletal system morphogenesis	GO:0048705	0.0367891	5	PHOSPHO1,COMP,SMPD3,MTHFD1L,MDFI
GO:BP	regulation of ion transmembrane transporter activity	GO:0032412	0.0367891	5	CBARP,FGF12,STAC3,STAC2,STAC
GO:BP	regulation of heart contraction	GO:0008016	0.0367891	2	CACNA1G,APLN
GO:BP	regulation of interleukin-17 production	GO:0032660	0.0367891	2	CCL1,SLC7A5
GO:BP	pyrimidine ribonucleoside monophosphate catabolic process	GO:0009175	0.0367891	1	UPP1
GO:BP	regulation of bone mineralization	GO:0030500	0.0367891	2	PHOSPHO1,COMP
GO:BP	UMP salvage	GO:0044206	0.0367891	1	UPP1
GO:BP	pyrimidine ribonucleotide salvage	GO:0010138	0.0367891	1	UPP1
GO:BP	negative regulation of lymphocyte apoptotic process	GO:0070229	0.0367891	2	IL7R,BCL6
GO:BP	UMP catabolic process	GO:0046050	0.0367891	1	UPP1
GO:BP	regulation of signal transduction	GO:0009966	0.0367891	25	CCL1,APLN,IL1RN,ONECUT2,PSD2,IL7R,VEGFA,HYOU1,AKAP12,HSPA5,GPR17,SPRED3,CNKSR3,BCL6,RPF2,GUCA1A,SPRY4,RGS16,TFRC,NOS3,RRS1,NLRC3,MDFI,GOT1,HCRTR1
GO:BP	obsolete oxidation-reduction process	GO:0055114	0.0367891	8	ACOX2,P4HA1,RDH13,MTHFD1L,NOS3,PLOD2,ERO1A,UGDH
GO:BP	vesicle-mediated transport	GO:0016192	0.0367891	4	CACNA1G,TUBA4A,CBARP,APLN
GO:BP	dTMP metabolic process	GO:0046073	0.0367891	1	UPP1
GO:BP	platelet aggregation	GO:0070527	0.0367891	6	COMP,UBASH3B,VCL,HSPB1,MYH9,SH2B3
GO:BP	mitotic sister chromatid cohesion, centromeric	GO:0071962	0.0367891	2	NAA50,NAA10
GO:BP	carboxylic acid metabolic process	GO:0019752	0.0372982	21	ACOX2,FABP3,ACOT7,MTHFD1L,NOS3,GOT1,PLOD2,UGDH,CS,SLC16A3,MRI1,PFKL,ACO1,IDH3A,SLC2A1,PFAS,PPARD,IDH2,ERLIN1,VARS,SLC16A1
GO:BP	protein maturation by protein folding	GO:0022417	0.0372982	2	ERO1A,CALR
GO:BP	Cajal body organization	GO:0030576	0.0372982	2	ZPR1,WRAP53
GO:BP	cellular response to interleukin-1	GO:0071347	0.0374587	2	CCL1,IL1RN
GO:BP	gastrulation	GO:0007369	0.0374587	2	APLN,IL1RN
GO:BP	photoreceptor cell differentiation	GO:0046530	0.0374587	3	VEGFA,RDH13,SDK2
GO:BP	organophosphate biosynthetic process	GO:0090407	0.0374587	8	PHOSPHO1,UPP1,NMRK2,FABP3,ACOT7,GUCA1A,NOS3,ABHD8
GO:BP	positive regulation of cyclase activity	GO:0031281	0.0374587	2	GUCA1A,NOS3
GO:BP	fibroblast growth factor receptor signaling pathway	GO:0008543	0.037624	4	APLN,FGF12,SPRY4,SPRY1
GO:BP	homotypic cell-cell adhesion	GO:0034109	0.0377086	7	COMP,UBASH3B,VCL,HSPB1,PLPP3,MYH9,SH2B3
GO:BP	lactate transport	GO:0015727	0.0377646	2	SLC16A3,SLC16A1
GO:BP	organic substance metabolic process	GO:0071704	0.0377646	286	CCL1,APLN,IL1RN,PHOSPHO1,UPP1,ACOX2,ONECUT2,NMRK2,ASPHD2,MASP1,COMP,ZFP36,IL7R,SMPD3,SLC7A5,VEGFA,FABP3,AKAP12,HSPA5,SPRED3,P4HA1,XYLT1,CNKSR3,ACOT7,BCL6,HS3ST2,RDH13,MTHFD1L,RPF2,GUCA1A,SPRY4,CSDC2,WDR77,CRELD2,NOP14,SDC4,SLC51B,TFRC,NOS3,PCDH12,ABHD8,RRS1,NLRC3,MAMSTR,MDFI,GOT1,PLOD2,ZFAND2A,ERO1A,PUSL1,PABPC1L,UGDH,SPRY1,PRAG1,SRCIN1,RRP12,CS,FDXACB1,WDR4,CCND1,AGTR1,SLC16A3,METTL1,ATP5MC1,GAR…
GO:BP	lactate transmembrane transport	GO:0035873	0.0377646	2	SLC16A3,SLC16A1
GO:BP	regulation of hormone levels	GO:0010817	0.0377646	14	APLN,IL1RN,SMPD3,SLC7A5,RDH13,KCNG2,AGTR1,ENPEP,PFKL,RAPGEF4,SLC2A1,PPARD,SLC16A1,CRY1
GO:BP	regulation of histone deacetylation	GO:0031063	0.0378991	2	VEGFA,BCL6
GO:BP	regulation of monocyte chemotaxis	GO:0090025	0.0378991	1	CCL1
GO:BP	regulation of polynucleotide adenylyltransferase activity	GO:1904245	0.0378991	1	ZFP36
GO:BP	drinking behavior	GO:0042756	0.0378991	1	APLN
GO:BP	protein deacylation	GO:0035601	0.0382624	3	VEGFA,SPRED3,BCL6
GO:BP	cellular response to chemical stimulus	GO:0070887	0.0382624	16	CCL1,APLN,CRHR2,IL1RN,ONECUT2,COMP,ZFP36,IL7R,SMPD3,VEGFA,HYOU1,AKAP12,HSPA5,GPR17,SPRED3,FGF12
GO:BP	corticosteroid receptor signaling pathway	GO:0031958	0.0382832	3	CALR,CRY1,PHB
GO:BP	extracellular vesicle biogenesis	GO:0140112	0.0384427	2	SMPD3,SDC4
GO:BP	innate immune response	GO:0045087	0.0384427	2	AKAP1,CCL1
GO:BP	telomere maintenance via telomere lengthening	GO:0010833	0.0384458	7	GAR1,NAT10,NHP2,CCT6A,NAF1,CCT5,WRAP53
GO:BP	negative regulation of interleukin-1-mediated signaling pathway	GO:2000660	0.0385763	1	IL1RN
GO:BP	positive regulation of calcium ion-dependent exocytosis	GO:0045956	0.0386811	1	CACNA1G
GO:BP	homeostasis of number of cells	GO:0048872	0.0386811	6	ZFP36,IL7R,VEGFA,BCL6,NOS3,SH2B2
GO:BP	response to glucocorticoid	GO:0051384	0.0386811	5	IL1RN,ZFP36,GOT1,CCND1,ABCA3
GO:BP	cellular response to tumor necrosis factor	GO:0071356	0.0386811	4	CCL1,ZFP36,SMPD3,AKAP12
GO:BP	positive regulation of lyase activity	GO:0051349	0.0386811	2	GUCA1A,NOS3
GO:BP	regulation of transmembrane transporter activity	GO:0022898	0.0386811	5	CBARP,FGF12,STAC3,STAC2,STAC
GO:BP	retinal blood vessel morphogenesis	GO:0061304	0.0389123	2	FZD4,COL4A1
GO:BP	glucuronoside transport	GO:0015779	0.0390078	1	ABCC3
GO:BP	polysaccharide localization	GO:0033037	0.0390078	1	SMPD3
GO:BP	negative regulation of small GTPase mediated signal transduction	GO:0051058	0.0390078	3	BCL6,SPRY4,SPRY1
GO:BP	protein localization to nucleoplasm	GO:1990173	0.0391278	3	CCT6A,CCT5,WRAP53
GO:BP	surfactant homeostasis	GO:0043129	0.0392156	2	VEGFA,ABCA3
GO:BP	protein refolding	GO:0042026	0.0394614	3	HSPA5,DNAJA4,HSPA13
GO:BP	vasoconstriction	GO:0042310	0.039554	2	APLN,COMP
GO:BP	S-adenosylmethionine metabolic process	GO:0046500	0.039554	3	MRI1,AHCYL1,MAT2A
GO:BP	IRE1-mediated unfolded protein response	GO:0036498	0.039554	5	HYOU1,HSPA5,DNAJB11,SRPRB,GOSR2
GO:BP	dCMP metabolic process	GO:0046063	0.039554	1	UPP1
GO:BP	dCMP catabolic process	GO:0006249	0.039554	1	UPP1
GO:BP	dUMP catabolic process	GO:0046079	0.039554	1	UPP1
GO:BP	N-terminal protein amino acid modification	GO:0031365	0.0396895	4	NAA40,NAA20,NAA50,NAA10
GO:BP	phenylalanine transport	GO:0015823	0.0399522	1	SLC7A5
GO:BP	L-tryptophan transmembrane transport	GO:1904556	0.0399522	1	SLC7A5
GO:BP	positive regulation of purine nucleotide biosynthetic process	GO:1900373	0.0399522	2	GUCA1A,NOS3
GO:BP	regulation of immune system process	GO:0002682	0.0399522	11	CCL1,CRHR2,MASP1,ZFP36,IL7R,SMPD3,SLC7A5,VEGFA,GPR17,C7,BCL6
GO:BP	positive regulation of nucleotide biosynthetic process	GO:0030810	0.0399522	2	GUCA1A,NOS3
GO:BP	positive regulation of ion transport	GO:0043270	0.0399522	5	FGF12,CNKSR3,STAC3,STAC2,STAC
GO:BP	nucleotide biosynthetic process	GO:0009165	0.0399522	5	UPP1,NMRK2,ACOT7,GUCA1A,NOS3
GO:BP	coronary vasculature development	GO:0060976	0.0399522	2	APLN,VEGFA
GO:BP	macromolecule deacylation	GO:0098732	0.0399522	3	VEGFA,SPRED3,BCL6
GO:BP	membrane depolarization during cardiac muscle cell action potential	GO:0086012	0.0401387	1	CACNA1G
GO:BP	enzyme linked receptor protein signaling pathway	GO:0007167	0.0401387	8	APLN,ONECUT2,COMP,SMPD3,VEGFA,HSPA5,SPRED3,FGF12
GO:BP	heart contraction	GO:0060047	0.0401387	2	CACNA1G,APLN
GO:BP	erythrocyte differentiation	GO:0030218	0.0402123	3	ZFP36,VEGFA,BCL6
GO:BP	VEGF-activated neuropilin signaling pathway	GO:0038190	0.0402123	1	VEGFA
GO:BP	negative regulation of establishment of endothelial barrier	GO:1903141	0.0402123	1	VEGFA
GO:BP	negative regulation of endothelial cell development	GO:1901551	0.0402123	1	VEGFA
GO:BP	positive regulation of retinal ganglion cell axon guidance	GO:1902336	0.0402123	1	VEGFA
GO:BP	coronary vein morphogenesis	GO:0003169	0.0402123	1	VEGFA
GO:BP	cellular localization	GO:0051641	0.0403125	102	TUBA4A,SAPCD2,ZFP36,VEGFA,MYO5B,FABP3,HYOU1,HSPA5,STAC3,RPF2,STAC2,STAC,SLC51B,TFRC,RRS1,NACAD,ERO1A,MANF,PABPC1L,SPRY1,ARL5A,ATP5MC1,UBASH3B,MLEC,TIMM9,PFKL,TIMM8A,RAPGEF4,GNL3,SRL,SNTA1,ATP1B3,CABP1,PPARD,GLIS2,AHCYL1,PKDCC,CALR,NOLC1,NOL6,ECM1,LTV1,GRPEL1,SLC29A1,TINAGL1,SLC5A3,NOP9,NEDD4L,ATP11A,PIGW,ERGIC1,PGM2,TIMM50,GEMIN5,VCL,BYSL,HSPA4,SRPRB,GOSR2,SAR1B,CCT6A,PA2G4,ATP1A1,KIF16B,NUS1,SPC…
GO:BP	positive regulation of secretion by cell	GO:1903532	0.0404973	2	CACNA1G,APLN
GO:BP	calcium ion transport	GO:0006816	0.0407429	6	CACNA1G,CBARP,TRPM3,STAC3,STAC2,STAC
GO:BP	protein insertion into mitochondrial membrane	GO:0051204	0.04077	5	TIMM9,TIMM8A,HSPA4,TIMM13,PDCD5
GO:BP	positive regulation of heat generation	GO:0031652	0.0408782	1	APLN
GO:BP	system development	GO:0048731	0.0408782	40	CACNA1G,APLN,PHOSPHO1,SAPCD2,ONECUT2,COMP,CLSTN2,ZFP36,IL7R,SMPD3,VEGFA,HSPA5,GPR17,SPRED3,FGF12,XYLT1,BCL6,RDH13,STAC3,MTHFD1L,SPRY4,WDR77,SDC4,TFRC,MDGA1,NOS3,PCDH12,SPATA5,MDFI,SDK2,TENM4,ERO1A,MANF,LRFN4,UGDH,SPRY1,PRAG1,CCDC134,SH2B2,SRCIN1
GO:BP	cellular response to magnesium ion	GO:0071286	0.0409889	2	SMPD3,SLC41A1
GO:BP	heart process	GO:0003015	0.0414146	2	CACNA1G,APLN
GO:BP	nucleoside phosphate biosynthetic process	GO:1901293	0.0414146	5	UPP1,NMRK2,ACOT7,GUCA1A,NOS3
GO:BP	regulation of hormone secretion	GO:0046883	0.0414146	9	APLN,KCNG2,AGTR1,PFKL,RAPGEF4,SLC2A1,PPARD,SLC16A1,CRY1
GO:BP	regulation of blood circulation	GO:1903522	0.0417663	2	CACNA1G,APLN
GO:BP	regulation of vascular permeability	GO:0043114	0.0417663	2	VEGFA,AKAP12
GO:BP	regulation of intracellular signal transduction	GO:1902531	0.0417663	19	CCL1,PSD2,VEGFA,HYOU1,AKAP12,GPR17,SPRED3,CNKSR3,BCL6,RPF2,GUCA1A,SPRY4,TFRC,RRS1,NLRC3,HCRTR1,SPRY1,PRAG1,SH2B2
GO:BP	regulation of cell junction assembly	GO:1901888	0.041823	5	CLSTN2,VEGFA,SDC4,MDGA1,LRFN4
GO:BP	positive regulation of posttranscriptional gene silencing	GO:0060148	0.0419153	4	ZFP36,XPO5,MAP2K1,EIF4E2
GO:BP	pyrimidine ribonucleotide catabolic process	GO:0009222	0.0419153	1	UPP1
GO:BP	response to interleukin-1	GO:0070555	0.0419153	2	CCL1,IL1RN
GO:BP	eye photoreceptor cell development	GO:0042462	0.0419153	2	VEGFA,RDH13
GO:BP	negative regulation of endoplasmic reticulum stress-induced neuron intrinsic apoptotic signaling pathway	GO:1903382	0.0419153	1	HYOU1
GO:BP	regulation of endoplasmic reticulum stress-induced neuron intrinsic apoptotic signaling pathway	GO:1903381	0.0419153	1	HYOU1
GO:BP	receptor-mediated endocytosis	GO:0006898	0.0419153	4	APLN,MASP1,VEGFA,HYOU1
GO:BP	neuron intrinsic apoptotic signaling pathway in response to endoplasmic reticulum stress	GO:0036483	0.0419153	1	HYOU1
GO:BP	positive regulation of exocytosis	GO:0045921	0.0420488	3	CACNA1G,SMPD3,SDC4
GO:BP	regulation of multicellular organismal process	GO:0051239	0.0420488	15	CCL1,CACNA1G,APLN,PHOSPHO1,COMP,CLSTN2,ZFP36,IL7R,SMPD3,SLC7A5,VEGFA,AKAP12,SPRED3,FGF12,BCL6
GO:BP	hepatic stellate cell migration	GO:0061868	0.0421987	1	AKAP12
GO:BP	negative regulation of response to endoplasmic reticulum stress	GO:1903573	0.0421987	2	HYOU1,HSPA5
GO:BP	positive regulation of receptor-mediated endocytosis	GO:0048260	0.0421987	2	APLN,VEGFA
GO:BP	positive regulation of glial cell apoptotic process	GO:0034352	0.0421987	1	AKAP12
GO:BP	p38MAPK cascade	GO:0038066	0.0421987	2	ZFP36,VEGFA
GO:BP	regulation of oligodendrocyte apoptotic process	GO:1900141	0.0421987	1	AKAP12
GO:BP	regulation of hepatic stellate cell migration	GO:0061869	0.0421987	1	AKAP12
GO:BP	response to methamphetamine hydrochloride	GO:1904313	0.0427224	1	HSPA5
GO:BP	cerebellum structural organization	GO:0021589	0.0427224	1	HSPA5
GO:BP	protein localization to chromosome, telomeric region	GO:0070198	0.0427224	4	GNL3,CCT6A,CCT5,WRAP53
GO:BP	negative regulation of glial cell migration	GO:1903976	0.0427224	2	IDH2,CERS2
GO:BP	positive regulation of cellular component movement	GO:0051272	0.0427224	6	CCL1,ONECUT2,VEGFA,AKAP12,HSPA5,BCL6
GO:BP	oxoacid metabolic process	GO:0043436	0.0427224	21	ACOX2,FABP3,ACOT7,MTHFD1L,NOS3,GOT1,PLOD2,UGDH,CS,SLC16A3,MRI1,PFKL,ACO1,IDH3A,SLC2A1,PFAS,PPARD,IDH2,ERLIN1,VARS,SLC16A1
GO:BP	hindbrain structural organization	GO:0021577	0.0427224	1	HSPA5
GO:BP	response to tumor necrosis factor	GO:0034612	0.0428881	4	CCL1,ZFP36,SMPD3,AKAP12
GO:BP	regulation of immune effector process	GO:0002697	0.0431621	5	MASP1,IL7R,SLC7A5,C7,BCL6
GO:BP	negative regulation of transmembrane receptor protein serine/threonine kinase signaling pathway	GO:0090101	0.0432925	3	ONECUT2,HSPA5,SPRED3
GO:BP	positive regulation of focal adhesion assembly	GO:0051894	0.0435756	2	VEGFA,SDC4
GO:BP	regulation of biomineral tissue development	GO:0070167	0.0436141	2	PHOSPHO1,COMP
GO:BP	regulation of transporter activity	GO:0032409	0.0437503	5	CBARP,FGF12,STAC3,STAC2,STAC
GO:BP	outer mitochondrial membrane organization	GO:0007008	0.0437503	2	HSPA4,PDCD5
GO:BP	protein insertion into mitochondrial outer membrane	GO:0045040	0.0437503	2	HSPA4,PDCD5
GO:BP	ER-nucleus signaling pathway	GO:0006984	0.0437792	4	HSPA5,ERLIN1,CALR,LPCAT3
GO:BP	erythrocyte homeostasis	GO:0034101	0.0437792	3	ZFP36,VEGFA,BCL6
GO:BP	cell-cell signaling	GO:0007267	0.0437792	4	CACNA1G,APLN,CRHR2,IL1RN
GO:BP	chemical homeostasis within a tissue	GO:0048875	0.0439748	2	VEGFA,ABCA3
GO:BP	positive regulation of secretion	GO:0051047	0.0439748	2	CACNA1G,APLN
GO:BP	female pregnancy	GO:0007565	0.044306	7	VEGFA,SLC38A1,TEAD4,MST1,SLC2A1,PPARD,CALR
GO:BP	dUMP metabolic process	GO:0046078	0.044306	1	UPP1
GO:BP	pyrimidine nucleoside monophosphate catabolic process	GO:0009131	0.044306	1	UPP1
GO:BP	pyrimidine deoxyribonucleoside monophosphate catabolic process	GO:0009178	0.044306	1	UPP1
GO:BP	regulation of interleukin-1-mediated signaling pathway	GO:2000659	0.044306	1	IL1RN
GO:BP	regulation of biomineralization	GO:0110149	0.044306	2	PHOSPHO1,COMP
GO:BP	nuclear export	GO:0051168	0.044306	11	RRS1,AHCYL1,CALR,NOL6,LTV1,NOP9,STYX,ABCE1,XPO5,CPSF1,POLR2D
GO:BP	positive regulation of Rho protein signal transduction	GO:0035025	0.0444334	3	GPR17,PRAG1,GPR4
GO:BP	regulation of intracellular mRNA localization	GO:1904580	0.044498	1	ZFP36
GO:BP	positive regulation of intracellular mRNA localization	GO:1904582	0.044498	1	ZFP36
GO:BP	ATF6-mediated unfolded protein response	GO:0036500	0.044498	2	HSPA5,CALR
GO:BP	protein targeting	GO:0006605	0.0445904	18	HSPA5,SLC51B,NACAD,TIMM9,TIMM8A,GRPEL1,TIMM50,HSPA4,SRPRB,GOSR2,SPCS3,MYO1C,HGS,TOMM5,TIMM13,PDCD5,TOMM20,HRAS
GO:BP	transforming growth factor beta receptor signaling pathway	GO:0007179	0.0447628	5	ONECUT2,HSPA5,SPRED3,GOT1,SPRY1
GO:BP	ribosomal small subunit export from nucleus	GO:0000056	0.0448324	2	LTV1,NOP9
GO:BP	defense response to other organism	GO:0098542	0.0449006	2	AKAP1,CCL1
GO:BP	carboxylic acid biosynthetic process	GO:0046394	0.0453065	7	ACOX2,ACOT7,MTHFD1L,GOT1,PLOD2,UGDH,MRI1
GO:BP	nitrogen compound metabolic process	GO:0006807	0.0453119	257	APLN,PHOSPHO1,UPP1,ONECUT2,NMRK2,ASPHD2,MASP1,COMP,ZFP36,IL7R,SMPD3,VEGFA,FABP3,HSPA5,SPRED3,P4HA1,XYLT1,CNKSR3,ACOT7,BCL6,HS3ST2,MTHFD1L,RPF2,GUCA1A,SPRY4,CSDC2,WDR77,CRELD2,NOP14,SDC4,SLC51B,TFRC,NOS3,RRS1,NLRC3,MAMSTR,MDFI,GOT1,PLOD2,ZFAND2A,ERO1A,PUSL1,PABPC1L,UGDH,SPRY1,PRAG1,SRCIN1,RRP12,FDXACB1,WDR4,CCND1,AGTR1,METTL1,ATP5MC1,GAR1,MRI1,POLR3G,SMYD5,ABCA3,TEAD4,PWP2,UBASH3B,ENPEP,NAT10,PTPR…
GO:BP	regulation of heat generation	GO:0031650	0.0454526	1	APLN
GO:BP	regulation of receptor internalization	GO:0002090	0.046024	2	APLN,VEGFA
GO:BP	nitric oxide mediated signal transduction	GO:0007263	0.0461397	2	VEGFA,NOS3
GO:BP	multicellular organismal process	GO:0032501	0.0466706	56	AKAP1,CCL1,CACNA1G,APLN,IL1RN,PHOSPHO1,SAPCD2,ONECUT2,COMP,TRPM3,CLSTN2,ZFP36,IL7R,SMPD3,SLC7A5,VEGFA,MYO5B,AKAP12,HSPA5,GPR17,SPRED3,FGF12,XYLT1,BCL6,RDH13,STAC3,MTHFD1L,GUCA1A,SPRY4,WDR77,KCNG2,ABCC3,RGS16,STAC2,STAC,SDC4,TFRC,MDGA1,NOS3,PCDH12,SPATA5,NLRC3,MDFI,SDK2,TENM4,ERO1A,MANF,PABPC1L,LRFN4,UGDH,SPRY1,PRAG1,CCDC134,SH2B2,SLC38A1,SRCIN1
GO:BP	establishment of protein localization to telomere	GO:0070200	0.0466706	3	CCT6A,CCT5,WRAP53
GO:BP	negative regulation of hyaluronan biosynthetic process	GO:1900126	0.0466706	1	SMPD3
GO:BP	platelet-derived growth factor receptor signaling pathway	GO:0048008	0.0468386	2	SMPD3,VEGFA
GO:BP	regulation of cell-cell adhesion involved in gastrulation	GO:0070587	0.0468386	1	IL1RN
GO:BP	positive regulation of cytosolic calcium ion concentration involved in phospholipase C-activating G protein-coupled signaling pathway	GO:0051482	0.0468386	3	GPR17,AGTR1,GPR4
GO:BP	negative regulation of heterotypic cell-cell adhesion	GO:0034115	0.0468386	1	IL1RN
GO:BP	Rho protein signal transduction	GO:0007266	0.0468428	6	GPR17,BCL6,PRAG1,AGTR1,GPR4,RASGRF2
GO:BP	phospholipid homeostasis	GO:0055091	0.0472004	2	FABP3,ABCA3
GO:BP	negative regulation of cell adhesion	GO:0007162	0.0473231	5	IL1RN,VEGFA,BCL6,SPRY4,SDC4
GO:BP	negative regulation of voltage-gated calcium channel activity	GO:1901386	0.0474002	1	CBARP
GO:BP	medium-chain fatty-acyl-CoA catabolic process	GO:0036114	0.0474002	1	ACOT7
GO:BP	inflammatory response to antigenic stimulus	GO:0002437	0.048078	2	CRHR2,IL1RN
GO:BP	regulation of mitotic cell cycle DNA replication	GO:1903463	0.048078	1	BCL6
GO:BP	response to stress	GO:0006950	0.048078	18	AKAP1,CCL1,CRHR2,IL1RN,UPP1,ACOX2,MASP1,COMP,ZFP36,IL7R,SMPD3,VEGFA,HYOU1,HSPA5,GPR17,SPRED3,C7,FGF12
GO:BP	negative regulation of mast cell cytokine production	GO:0032764	0.048078	1	BCL6
GO:BP	DNA biosynthetic process	GO:0071897	0.0481139	11	SMPD3,VEGFA,GAR1,NAT10,NHP2,CCT6A,USP10,NAF1,CCT5,PHB,WRAP53
GO:BP	regulation of systemic arterial blood pressure mediated by a chemical signal	GO:0003044	0.0483801	3	NOS3,AGTR1,ENPEP
GO:BP	actin filament-based movement	GO:0030048	0.0483801	3	CACNA1G,MYO5B,FGF12
GO:BP	negative regulation of blood-brain barrier permeability	GO:1905604	0.0486625	1	VEGFA
GO:BP	response to high light intensity	GO:0009644	0.0486625	1	RDH13
GO:BP	organic acid biosynthetic process	GO:0016053	0.0486625	7	ACOX2,ACOT7,MTHFD1L,GOT1,PLOD2,UGDH,MRI1
GO:BP	cardiac vascular smooth muscle cell development	GO:0060948	0.0486625	1	VEGFA
GO:BP	positive regulation of axon guidance	GO:1902669	0.0486625	1	VEGFA
GO:BP	cell-cell adhesion involved in gastrulation	GO:0070586	0.0486625	1	IL1RN
GO:BP	positive regulation of cell proliferation by VEGF-activated platelet derived growth factor receptor signaling pathway	GO:0038091	0.0486625	1	VEGFA
GO:BP	cellular stress response to acid chemical	GO:0097533	0.0486625	1	VEGFA
GO:BP	stress response to acid chemical	GO:0097532	0.0486625	1	VEGFA
GO:BP	negative regulation of adherens junction organization	GO:1903392	0.0486625	1	VEGFA
GO:BP	VEGF-activated platelet-derived growth factor receptor signaling pathway	GO:0038086	0.0486625	1	VEGFA
GO:BP	antigen processing and presentation of peptide antigen via MHC class I	GO:0002474	0.0486625	7	ABCB9,CALR,SAR1B,PSMD14,PSMD3,CANX,PSMD11
GO:BP	response to corticosteroid	GO:0031960	0.0486625	5	IL1RN,ZFP36,GOT1,CCND1,ABCA3
GO:BP	anatomical structure maturation	GO:0071695	0.0488338	5	PHOSPHO1,VEGFA,XYLT1,WDR77,PABPC1L
GO:BP	ribonucleotide catabolic process	GO:0009261	0.0489135	2	UPP1,ACOT7
GO:BP	lipid homeostasis	GO:0055088	0.0489539	5	ACOX2,FABP3,ABHD8,GOT1,ABCA3
GO:BP	nucleic acid metabolic process	GO:0090304	0.0491911	137	APLN,ONECUT2,ZFP36,IL7R,SMPD3,VEGFA,HSPA5,BCL6,RPF2,CSDC2,WDR77,NOP14,TFRC,RRS1,NLRC3,MAMSTR,MDFI,PUSL1,PABPC1L,RRP12,FDXACB1,WDR4,CCND1,METTL1,GAR1,POLR3G,TEAD4,PWP2,NAT10,MAFF,TAF4B,RSL1D1,DIS3,PUS7,GNL3,PPRC1,IVNS1ABP,NCOR2,MYBBP1A,RRP7A,NABP1,TSR1,RRP15,IMP4,PPARD,GLIS2,AHCYL1,INTS1,BOP1,HIGD1A,NSUN6,VARS,EMG1,CALR,PIM2,NOLC1,NOL6,NOP2,UTP20,TRMT1,TRIM16,CRY1,EEF1E1,MAK16,AEN,ECM1,RPP38,WDR12…
GO:BP	regulation of mast cell chemotaxis	GO:0060753	0.049418	2	VEGFA,RIN3
GO:BP	cell-cell signaling involved in cardiac conduction	GO:0086019	0.0496024	1	CACNA1G
GO:BP	pyrimidine ribonucleoside monophosphate biosynthetic process	GO:0009174	0.0497556	1	UPP1
GO:BP	establishment of protein localization to mitochondrial membrane	GO:0090151	0.0497556	5	TIMM9,TIMM8A,HSPA4,TIMM13,PDCD5
GO:BP	UMP biosynthetic process	GO:0006222	0.0497556	1	UPP1
GO:BP	10-formyltetrahydrofolate biosynthetic process	GO:0009257	0.0497556	1	MTHFD1L
GO:CC	preribosome	GO:0030684	2.56217e-21	23	NOP14,RRS1,NIP7,PWP2,RSL1D1,RRP7A,TSR1,RRP15,IMP4,BOP1,EMG1,NOL6,UTP20,MAK16,WDR12,LTV1,FTSJ3,NOP9,MRTO4,UTP4,WDR36,FBL,BYSL
GO:CC	90S preribosome	GO:0030686	1.38593e-13	12	NOP14,PWP2,RSL1D1,RRP7A,IMP4,BOP1,NOL6,UTP20,WDR12,NOP9,UTP4,WDR36
GO:CC	nucleolus	GO:0005730	2.2857e-13	53	SAPCD2,BCL6,PNMA2,RPF2,NOP14,CCDC86,RRS1,RRP12,PNO1,METTL1,NIP7,GAR1,MRI1,PWP2,NAT10,TAF4B,RSL1D1,GNL3,MYBBP1A,RRP7A,TSR1,IMP4,BOP1,EMG1,GRWD1,NOP16,NOLC1,NOL6,NOP2,UTP20,EEF1E1,MAK16,AEN,RPP38,WDR12,RBM34,FTSJ3,DDX56,NOP9,MRTO4,UTP4,WDR36,FBL,PUM3,NHP2,UTP15,NIFK,RRP8,BYSL,NAF1,PA2G4,POLR2E,WDR43
GO:CC	ribonucleoprotein complex	GO:1990904	7.60635e-10	47	ZFP36,NOP14,RRS1,PABPC1L,NIP7,GAR1,PWP2,NAT10,RSL1D1,IVNS1ABP,RRP7A,TSR1,RRP15,IMP4,BOP1,EMG1,CALR,NOLC1,NOL6,UTP20,MAK16,RPP38,WDR12,LTV1,FTSJ3,NOP9,MRTO4,UTP4,WDR36,FBL,NHP2,MRPL21,BYSL,MRPL15,NAF1,RUVBL1,XPO5,SNRNP40,PDCD11,MRPL20,SNRPA,EIF2S1,G3BP1,EIF3B,WRAP53,MRPL52,SNRPC
GO:CC	preribosome, large subunit precursor	GO:0030687	4.41531e-08	8	RRS1,NIP7,RRP15,BOP1,MAK16,WDR12,FTSJ3,MRTO4
GO:CC	preribosome, small subunit precursor	GO:0030688	7.27717e-08	7	NOP14,TSR1,UTP20,LTV1,FTSJ3,NOP9,BYSL
GO:CC	small-subunit processome	GO:0032040	1.51134e-07	9	NOP14,PWP2,IMP4,EMG1,NOL6,UTP20,UTP4,WDR36,FBL
GO:CC	intracellular organelle lumen	GO:0070013	2.78116e-07	175	UPP1,SAPCD2,ACOX2,ONECUT2,NMRK2,MASP1,IL7R,VEGFA,HYOU1,HSPA5,P4HA1,ACOT7,BCL6,STAC3,MTHFD1L,PNMA2,RPF2,WDR77,NOP14,CCDC86,SDC4,RRS1,GOT1,ERO1A,MANF,UGDH,SPRY1,RRP12,CS,WDR4,CCND1,PNO1,METTL1,NIP7,GAR1,MRI1,POLR3G,TEAD4,PWP2,NAT10,MAFF,TIMM9,PFKL,TAF4B,RSL1D1,DIS3,TIMM8A,GNL3,IDH3A,SRL,PPRC1,IVNS1ABP,NCOR2,MYBBP1A,RRP7A,NABP1,TSR1,IMP4,SDF2L1,PPARD,GLIS2,IDH2,INTS1,BOP1,HIGD1A,EMG1,GRWD1,CALR,RAPH…
GO:CC	membrane-enclosed lumen	GO:0031974	2.78116e-07	175	UPP1,SAPCD2,ACOX2,ONECUT2,NMRK2,MASP1,IL7R,VEGFA,HYOU1,HSPA5,P4HA1,ACOT7,BCL6,STAC3,MTHFD1L,PNMA2,RPF2,WDR77,NOP14,CCDC86,SDC4,RRS1,GOT1,ERO1A,MANF,UGDH,SPRY1,RRP12,CS,WDR4,CCND1,PNO1,METTL1,NIP7,GAR1,MRI1,POLR3G,TEAD4,PWP2,NAT10,MAFF,TIMM9,PFKL,TAF4B,RSL1D1,DIS3,TIMM8A,GNL3,IDH3A,SRL,PPRC1,IVNS1ABP,NCOR2,MYBBP1A,RRP7A,NABP1,TSR1,IMP4,SDF2L1,PPARD,GLIS2,IDH2,INTS1,BOP1,HIGD1A,EMG1,GRWD1,CALR,RAPH…
GO:CC	organelle lumen	GO:0043233	2.78116e-07	175	UPP1,SAPCD2,ACOX2,ONECUT2,NMRK2,MASP1,IL7R,VEGFA,HYOU1,HSPA5,P4HA1,ACOT7,BCL6,STAC3,MTHFD1L,PNMA2,RPF2,WDR77,NOP14,CCDC86,SDC4,RRS1,GOT1,ERO1A,MANF,UGDH,SPRY1,RRP12,CS,WDR4,CCND1,PNO1,METTL1,NIP7,GAR1,MRI1,POLR3G,TEAD4,PWP2,NAT10,MAFF,TIMM9,PFKL,TAF4B,RSL1D1,DIS3,TIMM8A,GNL3,IDH3A,SRL,PPRC1,IVNS1ABP,NCOR2,MYBBP1A,RRP7A,NABP1,TSR1,IMP4,SDF2L1,PPARD,GLIS2,IDH2,INTS1,BOP1,HIGD1A,EMG1,GRWD1,CALR,RAPH…
GO:CC	nuclear lumen	GO:0031981	3.94411e-05	140	UPP1,SAPCD2,ONECUT2,NMRK2,MASP1,IL7R,ACOT7,BCL6,STAC3,PNMA2,RPF2,WDR77,NOP14,CCDC86,RRS1,GOT1,UGDH,SPRY1,RRP12,WDR4,CCND1,PNO1,METTL1,NIP7,GAR1,MRI1,POLR3G,TEAD4,PWP2,NAT10,MAFF,TAF4B,RSL1D1,DIS3,GNL3,PPRC1,IVNS1ABP,NCOR2,MYBBP1A,RRP7A,NABP1,TSR1,IMP4,PPARD,GLIS2,INTS1,BOP1,HIGD1A,EMG1,GRWD1,RAPH1,NOP16,NOLC1,NOL6,NOP2,UTP20,TRMT1,TRIM16,EEF1E1,MAK16,AEN,FKBP4,RPP38,WDR12,LTV1,RBM34,GRPEL1,INTS2,…
GO:CC	cytoplasm	GO:0005737	6.57459e-05	304	AKAP1,CACNA1G,TUBA4A,CBARP,APLN,IL1RN,PHOSPHO1,UPP1,TUBA8,SAPCD2,ACOX2,NMRK2,MASP1,TMEM266,CLSTN2,ZFP36,IL7R,SMPD3,KCNAB3,SLC7A5,VEGFA,MYO5B,FABP3,HYOU1,AKAP12,HSPA5,P4HA1,FGF12,XYLT1,CNKSR3,ACOT7,BCL6,HS3ST2,RDH13,STAC3,MTHFD1L,SPRY4,CSDC2,WDR77,RGS16,STAC2,STAC,CRELD2,SDC4,TFRC,MDGA1,NOS3,ABHD8,SPATA5,NLRC3,NACAD,MDFI,GOT1,PLOD2,ZFAND2A,TENM4,ERO1A,PUSL1,SLC17A9,MANF,PABPC1L,UGDH,SPRY1,PRAG1,CC…
GO:CC	intracellular anatomical structure	GO:0005622	0.000130015	358	AKAP1,CACNA1G,TUBA4A,CBARP,APLN,IL1RN,PHOSPHO1,UPP1,TUBA8,SAPCD2,ACOX2,ONECUT2,NMRK2,MASP1,TMEM266,CLSTN2,ZFP36,IL7R,SMPD3,KCNAB3,SLC7A5,VEGFA,MYO5B,FABP3,HYOU1,AKAP12,HSPA5,P4HA1,FGF12,XYLT1,CNKSR3,ACOT7,BCL6,HS3ST2,RDH13,STAC3,MTHFD1L,PNMA2,RPF2,SPRY4,CSDC2,WDR77,RGS16,STAC2,STAC,CRELD2,NOP14,CCDC86,SDC4,TFRC,MDGA1,NOS3,ABHD8,RRS1,SPATA5,NLRC3,MAMSTR,NACAD,MDFI,GOT1,PLOD2,ZFAND2A,TENM4,ERO1A,PU…
GO:CC	intracellular membrane-bounded organelle	GO:0043231	0.000130015	305	AKAP1,CBARP,UPP1,SAPCD2,ACOX2,ONECUT2,NMRK2,MASP1,CLSTN2,ZFP36,IL7R,SMPD3,SLC7A5,VEGFA,MYO5B,HYOU1,HSPA5,P4HA1,FGF12,XYLT1,ACOT7,BCL6,HS3ST2,RDH13,STAC3,MTHFD1L,PNMA2,RPF2,CSDC2,WDR77,CRELD2,NOP14,CCDC86,SDC4,TFRC,MDGA1,NOS3,ABHD8,RRS1,SPATA5,NLRC3,MAMSTR,NACAD,MDFI,GOT1,PLOD2,ZFAND2A,TENM4,ERO1A,PUSL1,SLC17A9,MANF,PABPC1L,UGDH,SPRY1,PRAG1,CCDC134,RRP12,CS,ARL5A,WDR4,CCND1,NUP210L,PNO1,SLC16A3,ME…
GO:CC	sno(s)RNA-containing ribonucleoprotein complex	GO:0005732	0.000159237	6	GAR1,NOLC1,FBL,NHP2,NAF1,SNRNP40
GO:CC	nucleoplasm	GO:0005654	0.000185149	128	UPP1,SAPCD2,ONECUT2,NMRK2,MASP1,IL7R,ACOT7,BCL6,STAC3,RPF2,WDR77,NOP14,CCDC86,RRS1,GOT1,UGDH,SPRY1,WDR4,CCND1,PNO1,METTL1,NIP7,GAR1,MRI1,POLR3G,TEAD4,PWP2,NAT10,MAFF,TAF4B,DIS3,GNL3,PPRC1,IVNS1ABP,NCOR2,MYBBP1A,RRP7A,NABP1,TSR1,IMP4,PPARD,GLIS2,INTS1,BOP1,HIGD1A,EMG1,GRWD1,RAPH1,NOP16,NOLC1,NOL6,NOP2,UTP20,TRMT1,TRIM16,EEF1E1,AEN,FKBP4,RPP38,WDR12,LTV1,RBM34,GRPEL1,INTS2,NAA40,FTSJ3,AMMECR1,UTP4,…
GO:CC	protein-containing complex	GO:0032991	0.000540318	160	CACNA1G,COMP,ZFP36,KCNAB3,SLC7A5,MYO5B,HYOU1,HSPA5,C7,P4HA1,STAC3,WDR77,KCNG2,NOP14,SLC51B,TFRC,RRS1,NACAD,ZFAND2A,PABPC1L,WDR4,CCND1,NUP210L,METTL1,NIP7,ATP5MC1,GAR1,NLRP6,POLR3G,TEAD4,PWP2,NAT10,TIMM9,PFKL,TAF4B,ABCB9,RSL1D1,DIS3,IVNS1ABP,SNTA1,NCOR2,MYBBP1A,RRP7A,NABP1,ATP1B3,TSR1,RRP15,IMP4,SDF2L1,ERLIN1,INTS1,BOP1,HIGD1A,EMG1,GRWD1,CALR,NOLC1,NOL6,UTP20,EEF1E1,MAK16,FKBP4,RPP38,WDR12,LTV1,GR…
GO:CC	membrane-bounded organelle	GO:0043227	0.00073337	324	AKAP1,TUBA4A,CBARP,IL1RN,PHOSPHO1,UPP1,SAPCD2,ACOX2,ONECUT2,NMRK2,MASP1,COMP,CLSTN2,ZFP36,IL7R,SMPD3,SLC7A5,VEGFA,MYO5B,FABP3,HYOU1,HSPA5,C7,P4HA1,FGF12,XYLT1,ACOT7,BCL6,HS3ST2,RDH13,STAC3,MTHFD1L,PNMA2,RPF2,GUCA1A,CSDC2,WDR77,KCNG2,CRELD2,NOP14,CCDC86,SDC4,TFRC,MDGA1,NOS3,PCDH12,ABHD8,RRS1,SPATA5,NLRC3,MAMSTR,NACAD,MDFI,GOT1,PLOD2,ZFAND2A,TENM4,ERO1A,PUSL1,SLC17A9,MANF,PABPC1L,UGDH,SPRY1,PRAG1,C…
GO:CC	box H/ACA RNP complex	GO:0072588	0.000751898	3	GAR1,NOLC1,NHP2
GO:CC	box H/ACA snoRNP complex	GO:0031429	0.000751898	3	GAR1,NOLC1,NHP2
GO:CC	endoplasmic reticulum chaperone complex	GO:0034663	0.00218986	3	HYOU1,HSPA5,SDF2L1
GO:CC	fibrillar center	GO:0001650	0.00233717	10	GAR1,MRI1,TAF4B,IMP4,NOLC1,RPP38,UTP4,FBL,UTP15,WDR43
GO:CC	CURI complex	GO:0032545	0.00257017	2	RRP7A,NOL6
GO:CC	UTP-C complex	GO:0034456	0.00257017	2	RRP7A,NOL6
GO:CC	chaperone complex	GO:0101031	0.00257017	5	SDF2L1,DNAJB11,STIP1,CCT6A,CCT5
GO:CC	sarcoplasmic reticulum lumen	GO:0033018	0.00257017	3	MANF,SRL,CALR
GO:CC	apical cortex	GO:0045179	0.00306138	2	SAPCD2,MYO5B
GO:CC	cell periphery	GO:0071944	0.0031875	38	CACNA1G,CBARP,CRHR2,IL1RN,PHOSPHO1,SAPCD2,SLC16A5,NMRK2,COMP,TMEM266,TRPM3,PSD2,CLSTN2,IL7R,SMPD3,KCNAB3,SLC7A5,VEGFA,MYO5B,AKAP12,HSPA5,GPR17,SPRED3,C7,CNKSR3,STAC3,SPRY4,KCNG2,ABCC3,RGS16,STAC2,STAC,SDC4,SLC51B,TFRC,MDGA1,NOS3,PCDH12
GO:CC	basolateral plasma membrane	GO:0016323	0.00364411	11	SLC7A5,ABCC3,SLC51B,TFRC,SLC38A1,SLC16A3,SLC2A1,ATP1B3,SLC16A1,SLC29A1,SLC41A1
GO:CC	basal plasma membrane	GO:0009925	0.00364411	14	SLC7A5,ABCC3,SLC51B,TFRC,SLC38A1,SLC16A3,SLC2A1,ATP1B3,SLC16A1,SLC29A1,SLC41A1,ATP1A1,MYO1C,PLPP3
GO:CC	Cajal body	GO:0015030	0.00458041	7	GAR1,NOLC1,FBL,NHP2,ZPR1,WRAP53,SNRPC
GO:CC	intracellular organelle	GO:0043229	0.00480133	317	AKAP1,TUBA4A,CBARP,UPP1,TUBA8,SAPCD2,ACOX2,ONECUT2,NMRK2,MASP1,CLSTN2,ZFP36,IL7R,SMPD3,SLC7A5,VEGFA,MYO5B,HYOU1,AKAP12,HSPA5,P4HA1,FGF12,XYLT1,ACOT7,BCL6,HS3ST2,RDH13,STAC3,MTHFD1L,PNMA2,RPF2,CSDC2,WDR77,CRELD2,NOP14,CCDC86,SDC4,TFRC,MDGA1,NOS3,ABHD8,RRS1,SPATA5,NLRC3,MAMSTR,NACAD,MDFI,GOT1,PLOD2,ZFAND2A,TENM4,ERO1A,PUSL1,SLC17A9,MANF,PABPC1L,UGDH,SPRY1,PRAG1,CCDC134,SH2B2,SRCIN1,RRP12,CS,ARL5A,W…
GO:CC	external side of apical plasma membrane	GO:0098591	0.00480133	2	SLC7A5,SLC38A1
GO:CC	tRNA methyltransferase complex	GO:0043527	0.00622915	2	WDR4,METTL1
GO:CC	basal part of cell	GO:0045178	0.00636257	14	SLC7A5,ABCC3,SLC51B,TFRC,SLC38A1,SLC16A3,SLC2A1,ATP1B3,SLC16A1,SLC29A1,SLC41A1,ATP1A1,MYO1C,PLPP3
GO:CC	PeBoW complex	GO:0070545	0.00643146	2	BOP1,WDR12
GO:CC	endoplasmic reticulum lumen	GO:0005788	0.00678229	16	HYOU1,HSPA5,P4HA1,ERO1A,MANF,SRL,SDF2L1,CALR,PDIA4,DNAJB11,COL4A2,COL4A1,COL15A1,CANX,TXNDC12,BACE1
GO:CC	basement membrane collagen trimer	GO:0098651	0.0069191	3	COL4A2,COL4A1,COL15A1
GO:CC	proteasome regulatory particle, lid subcomplex	GO:0008541	0.00702633	3	PSMD14,PSMD3,PSMD11
GO:CC	organelle	GO:0043226	0.00938257	333	AKAP1,TUBA4A,CBARP,IL1RN,PHOSPHO1,UPP1,TUBA8,SAPCD2,ACOX2,ONECUT2,NMRK2,MASP1,COMP,CLSTN2,ZFP36,IL7R,SMPD3,SLC7A5,VEGFA,MYO5B,FABP3,HYOU1,AKAP12,HSPA5,C7,P4HA1,FGF12,XYLT1,ACOT7,BCL6,HS3ST2,RDH13,STAC3,MTHFD1L,PNMA2,RPF2,GUCA1A,CSDC2,WDR77,KCNG2,CRELD2,NOP14,CCDC86,SDC4,TFRC,MDGA1,NOS3,PCDH12,ABHD8,RRS1,SPATA5,NLRC3,MAMSTR,NACAD,MDFI,GOT1,PLOD2,ZFAND2A,TENM4,ERO1A,PUSL1,SLC17A9,MANF,PABPC1L,LRFN4…
GO:CC	cytosol	GO:0005829	0.0112219	146	AKAP1,TUBA4A,PHOSPHO1,UPP1,SAPCD2,ACOX2,NMRK2,MASP1,TMEM266,ZFP36,IL7R,SLC7A5,FABP3,AKAP12,HSPA5,ACOT7,STAC3,MTHFD1L,SPRY4,WDR77,STAC2,STAC,NOS3,NLRC3,GOT1,MANF,PABPC1L,UGDH,SPRY1,SH2B2,RRP12,WDR4,CCND1,PNO1,METTL1,NIP7,NLRP6,MRI1,POLR3G,RPIA,RASGEF1A,PFKL,DIS3,ACO1,RAPGEF4,SLC2A1,IVNS1ABP,NABP1,TSR1,PFAS,NGLY1,DNAJA4,AHCYL1,IDH2,NSUN6,VARS,GRWD1,CALR,RAPH1,TRIM16,EEF1E1,FKBP4,RASGRF2,LTV1,NT5C3B…
GO:CC	nucleocytoplasmic transport complex	GO:0031074	0.0114341	2	MYBBP1A,XPO5
GO:CC	nuclear protein-containing complex	GO:0140513	0.0114341	44	HSPA5,NOP14,NUP210L,GAR1,POLR3G,PWP2,NAT10,TAF4B,DIS3,IVNS1ABP,NCOR2,RRP7A,NABP1,IMP4,INTS1,BOP1,NOLC1,NOL6,WDR12,INTS2,UTP4,WDR36,NHP2,POLR3E,MED22,RRP8,GEMIN5,E2F4,POLR2E,RUVBL1,GTF2H3,MYO1C,BCCIP,SNRNP40,CPSF1,DRAP1,SNRPA,MYH9,PHC2,POLR2D,WRAP53,YEATS2,RANBP1,SNRPC
GO:CC	extracellular exosome	GO:0070062	0.0114341	65	TUBA4A,IL1RN,COMP,SLC7A5,MYO5B,FABP3,HYOU1,HSPA5,C7,ACOT7,KCNG2,SDC4,TFRC,PCDH12,ABHD8,GOT1,PLOD2,PABPC1L,UGDH,SLC38A1,CS,ENPEP,PFKL,ACO1,SLC2A1,ATP1B3,PFAS,AHCYL1,IDH2,CALR,SLC16A1,FKBP4,ECM1,TINAGL1,HSPA13,NEDD4L,PLXNA1,FBL,PGM2,VCL,HSPA4,CCT6A,EIF4A1,ROBO4,PA2G4,RUVBL1,MAPKAPK2,COL4A2,ATP1A1,ARL8A,HSPB1,MYO1C,COL15A1,CCT5,HGS,STK10,PSMD3,CANX,PHB,ARPC5L,MYH9,AASDHPPT,EIF2S1,PDCD5,NAA50
GO:CC	telomerase holoenzyme complex	GO:0005697	0.0114341	4	GAR1,NAT10,NHP2,WRAP53
GO:CC	intrinsic component of plasma membrane	GO:0031226	0.0114341	21	CACNA1G,CRHR2,SLC16A5,TMEM266,TRPM3,CLSTN2,KCNAB3,GPR17,C7,KCNG2,SDC4,TFRC,MDGA1,PCDH12,HCRTR1,TENM4,LRFN4,SLC38A1,VSIG2,AGTR1,SLC16A3
GO:CC	cell junction	GO:0030054	0.0114341	22	CACNA1G,CBARP,CRHR2,SAPCD2,PSD2,CLSTN2,VEGFA,HYOU1,AKAP12,HSPA5,FGF12,STAC3,SPRY4,SDC4,MDGA1,PCDH12,GOT1,SDK2,HCRTR1,LRFN4,PRAG1,SRCIN1
GO:CC	plasma membrane	GO:0005886	0.0114341	34	CACNA1G,CBARP,CRHR2,IL1RN,SAPCD2,SLC16A5,NMRK2,TMEM266,TRPM3,PSD2,CLSTN2,IL7R,SMPD3,KCNAB3,SLC7A5,AKAP12,HSPA5,GPR17,SPRED3,C7,CNKSR3,STAC3,SPRY4,KCNG2,ABCC3,RGS16,STAC2,STAC,SDC4,SLC51B,TFRC,MDGA1,NOS3,PCDH12
GO:CC	N-terminal protein acetyltransferase complex	GO:0031414	0.0121569	3	NAA20,NAA50,NAA10
GO:CC	endoplasmic reticulum protein-containing complex	GO:0140534	0.0127995	9	HYOU1,HSPA5,P4HA1,ABCB9,SDF2L1,CALR,SRPRB,SPCS3,PIGC
GO:CC	box H/ACA scaRNP complex	GO:0072589	0.0129817	2	GAR1,NHP2
GO:CC	box H/ACA telomerase RNP complex	GO:0090661	0.0129817	2	GAR1,NHP2
GO:CC	integral component of plasma membrane	GO:0005887	0.0135543	20	CACNA1G,CRHR2,SLC16A5,TMEM266,TRPM3,CLSTN2,KCNAB3,GPR17,C7,KCNG2,SDC4,TFRC,PCDH12,HCRTR1,TENM4,LRFN4,SLC38A1,VSIG2,AGTR1,SLC16A3
GO:CC	extracellular organelle	GO:0043230	0.0154664	66	TUBA4A,IL1RN,PHOSPHO1,COMP,SLC7A5,MYO5B,FABP3,HYOU1,HSPA5,C7,ACOT7,KCNG2,SDC4,TFRC,PCDH12,ABHD8,GOT1,PLOD2,PABPC1L,UGDH,SLC38A1,CS,ENPEP,PFKL,ACO1,SLC2A1,ATP1B3,PFAS,AHCYL1,IDH2,CALR,SLC16A1,FKBP4,ECM1,TINAGL1,HSPA13,NEDD4L,PLXNA1,FBL,PGM2,VCL,HSPA4,CCT6A,EIF4A1,ROBO4,PA2G4,RUVBL1,MAPKAPK2,COL4A2,ATP1A1,ARL8A,HSPB1,MYO1C,COL15A1,CCT5,HGS,STK10,PSMD3,CANX,PHB,ARPC5L,MYH9,AASDHPPT,EIF2S1,PDCD5,NAA50
GO:CC	extracellular membrane-bounded organelle	GO:0065010	0.0154664	66	TUBA4A,IL1RN,PHOSPHO1,COMP,SLC7A5,MYO5B,FABP3,HYOU1,HSPA5,C7,ACOT7,KCNG2,SDC4,TFRC,PCDH12,ABHD8,GOT1,PLOD2,PABPC1L,UGDH,SLC38A1,CS,ENPEP,PFKL,ACO1,SLC2A1,ATP1B3,PFAS,AHCYL1,IDH2,CALR,SLC16A1,FKBP4,ECM1,TINAGL1,HSPA13,NEDD4L,PLXNA1,FBL,PGM2,VCL,HSPA4,CCT6A,EIF4A1,ROBO4,PA2G4,RUVBL1,MAPKAPK2,COL4A2,ATP1A1,ARL8A,HSPB1,MYO1C,COL15A1,CCT5,HGS,STK10,PSMD3,CANX,PHB,ARPC5L,MYH9,AASDHPPT,EIF2S1,PDCD5,NAA50
GO:CC	membrane	GO:0016020	0.0169068	49	AKAP1,CACNA1G,CBARP,CRHR2,IL1RN,TUBA8,SAPCD2,SLC16A5,NMRK2,ASPHD2,TMEM266,TRPM3,PSD2,TMEM182,CLSTN2,SSC4D,IL7R,SMPD3,KCNAB3,SLC7A5,VEGFA,MYO5B,HYOU1,AKAP12,HSPA5,GPR17,SPRED3,C7,P4HA1,XYLT1,CNKSR3,HS3ST2,RDH13,STAC3,MTHFD1L,GUCA1A,SPRY4,KCNG2,ABCC3,RGS16,STAC2,STAC,NOP14,SDC4,SLC51B,TFRC,MDGA1,NOS3,PCDH12
GO:CC	Golgi cis cisterna	GO:0000137	0.0174545	2	SMPD3,XYLT1
GO:CC	smooth endoplasmic reticulum	GO:0005790	0.0217345	2	HYOU1,HSPA5
GO:CC	extracellular vesicle	GO:1903561	0.0224425	65	TUBA4A,IL1RN,COMP,SLC7A5,MYO5B,FABP3,HYOU1,HSPA5,C7,ACOT7,KCNG2,SDC4,TFRC,PCDH12,ABHD8,GOT1,PLOD2,PABPC1L,UGDH,SLC38A1,CS,ENPEP,PFKL,ACO1,SLC2A1,ATP1B3,PFAS,AHCYL1,IDH2,CALR,SLC16A1,FKBP4,ECM1,TINAGL1,HSPA13,NEDD4L,PLXNA1,FBL,PGM2,VCL,HSPA4,CCT6A,EIF4A1,ROBO4,PA2G4,RUVBL1,MAPKAPK2,COL4A2,ATP1A1,ARL8A,HSPB1,MYO1C,COL15A1,CCT5,HGS,STK10,PSMD3,CANX,PHB,ARPC5L,MYH9,AASDHPPT,EIF2S1,PDCD5,NAA50
GO:CC	extracellular region	GO:0005576	0.022466	20	CCL1,TUBA4A,APLN,IL1RN,PHOSPHO1,MASP1,COMP,SSC4D,IL7R,SMPD3,SLC7A5,VEGFA,MYO5B,FABP3,HYOU1,HSPA5,C7,FGF12,XYLT1,ACOT7
GO:CC	nucleus	GO:0005634	0.0225643	194	UPP1,SAPCD2,ONECUT2,NMRK2,MASP1,ZFP36,IL7R,HSPA5,FGF12,ACOT7,BCL6,STAC3,PNMA2,RPF2,CSDC2,WDR77,NOP14,CCDC86,NOS3,RRS1,MAMSTR,NACAD,MDFI,GOT1,ZFAND2A,TENM4,MANF,PABPC1L,UGDH,SPRY1,PRAG1,CCDC134,RRP12,CS,WDR4,CCND1,NUP210L,PNO1,SLC16A3,METTL1,NIP7,GAR1,NLRP6,MRI1,POLR3G,TEAD4,PWP2,UBASH3B,NAT10,PTPRE,MAFF,TAF4B,RSL1D1,DIS3,PUS7,GNL3,IDH3A,SLC2A1,PPRC1,IFRD2,IVNS1ABP,NCOR2,MYBBP1A,RRP7A,NABP1,TSR1,I…
GO:CC	Pwp2p-containing subcomplex of 90S preribosome	GO:0034388	0.0247201	2	PWP2,WDR36
GO:CC	voltage-gated sodium channel complex	GO:0001518	0.0260849	1	CACNA1G
GO:CC	proteasome complex	GO:0000502	0.0260849	6	ZFAND2A,HSPB1,PSMD14,PSMD3,PSMD11,RAD23A
GO:CC	cell cortex region	GO:0099738	0.0260849	2	SAPCD2,MYO5B
GO:CC	RNA polymerase III complex	GO:0005666	0.0278815	3	POLR3G,POLR3E,POLR2E
GO:CC	amino acid transport complex	GO:1990184	0.0301055	1	SLC7A5
GO:CC	MHC class I peptide loading complex	GO:0042824	0.0301055	2	ABCB9,CALR
GO:CC	integral component of postsynaptic density membrane	GO:0099061	0.0301055	3	CLSTN2,LRFN4,SLC16A3
GO:CC	box C/D RNP complex	GO:0031428	0.0318609	2	NOLC1,FBL
GO:CC	mitochondrial intermembrane space protein transporter complex	GO:0042719	0.0327723	2	TIMM9,TIMM13
GO:CC	apical plasma membrane	GO:0016324	0.0327723	11	SAPCD2,SLC7A5,CNKSR3,SLC38A1,SLC16A3,ENPEP,SLC2A1,ATP1B3,AHCYL1,SLC16A1,SLC29A1
GO:CC	NatA complex	GO:0031415	0.0336613	2	NAA50,NAA10
GO:CC	intrinsic component of postsynaptic density membrane	GO:0099146	0.0336613	3	CLSTN2,LRFN4,SLC16A3
GO:CC	peptidase complex	GO:1905368	0.0336613	7	ZFAND2A,SPCS3,HSPB1,PSMD14,PSMD3,PSMD11,RAD23A
GO:CC	endopeptidase complex	GO:1905369	0.0336613	6	ZFAND2A,HSPB1,PSMD14,PSMD3,PSMD11,RAD23A
GO:CC	sodium channel complex	GO:0034706	0.0336613	1	CACNA1G
GO:CC	extracellular space	GO:0005615	0.0337474	30	CCL1,TUBA4A,APLN,IL1RN,MASP1,COMP,SLC7A5,VEGFA,MYO5B,FABP3,HYOU1,HSPA5,C7,FGF12,XYLT1,ACOT7,KCNG2,CRELD2,SDC4,TFRC,MDGA1,PCDH12,ABHD8,GOT1,PLOD2,MANF,PABPC1L,UGDH,SLC38A1,CS
GO:CC	melanosome	GO:0042470	0.0337474	7	HSPA5,TFRC,SLC2A1,ATP1B3,PDIA4,ATP1A1,CANX
GO:CC	apical part of cell	GO:0045177	0.0337474	11	SAPCD2,SLC7A5,MYO5B,CNKSR3,SLC38A1,SLC16A3,ENPEP,SLC2A1,ATP1B3,AHCYL1,SLC16A1
GO:CC	procollagen-proline 4-dioxygenase complex	GO:0016222	0.0337474	1	P4HA1
GO:CC	pigment granule	GO:0048770	0.0337474	7	HSPA5,TFRC,SLC2A1,ATP1B3,PDIA4,ATP1A1,CANX
GO:CC	extrinsic component of cytoplasmic side of plasma membrane	GO:0031234	0.0338835	3	STAC3,STAC2,STAC
GO:CC	cation channel complex	GO:0034703	0.0361263	4	CACNA1G,KCNAB3,STAC3,KCNG2
GO:CC	distal axon	GO:0150034	0.0385926	2	CBARP,CRHR2
GO:CC	cortical granule	GO:0060473	0.0394793	2	CALR,MYH9
GO:CC	sarcolemma	GO:0042383	0.0394793	5	STAC3,STAC2,STAC,SLC2A1,SNTA1
GO:CC	lateral plasma membrane	GO:0016328	0.0412301	5	SLC16A3,SNTA1,SLC16A1,ATP1A1,MYO1C
GO:CC	voltage-gated calcium channel complex	GO:0005891	0.0412301	2	CACNA1G,STAC3
GO:CC	collagen type IV trimer	GO:0005587	0.0417063	2	COL4A2,COL4A1
GO:CC	Noc4p-Nop14p complex	GO:0030692	0.0459958	1	NOP14
GO:CC	endocytic vesicle lumen	GO:0071682	0.0472382	3	HYOU1,CALR,HGS
GO:CC	catalytic complex	GO:1902494	0.049053	43	ZFP36,P4HA1,WDR77,ZFAND2A,WDR4,CCND1,METTL1,GAR1,POLR3G,PFKL,TAF4B,DIS3,NCOR2,NOLC1,RPP38,NHP2,POLR3E,TNFAIP1,PDSS1,DET1,POLR2E,RUVBL1,NUS1,SPCS3,GTF2H3,PRMT1,HSPB1,BCCIP,FARSB,NAA20,PSMD14,SNRNP40,MAT2A,PSMD3,PIGC,NAA50,PHC2,PSMD11,POLR2D,NAA10,RAD23A,PTPA,YEATS2
KEGG	Ribosome biogenesis in eukaryotes	KEGG:03008	0.000176186	15	SPATA5,GAR1,PWP2,NAT10,GNL3,RRP7A,IMP4,EMG1,NOL6,RPP38,UTP4,WDR36,FBL,NHP2,UTP15
KEGG	2-Oxocarboxylic acid metabolism	KEGG:01210	0.00534088	5	GOT1,CS,ACO1,IDH3A,IDH2
REAC	rRNA modification in the nucleus and cytosol	REAC:R-HSA-6790901	3.86454e-10	17	NOP14,PNO1,GAR1,PWP2,NAT10,RRP7A,IMP4,EMG1,NOL6,NOP2,UTP20,UTP4,WDR36,FBL,NHP2,UTP15,WDR43
REAC	rRNA processing in the nucleus and cytosol	REAC:R-HSA-8868773	1.65077e-09	26	NOP14,PNO1,NIP7,GAR1,PWP2,NAT10,DIS3,GNL3,RRP7A,TSR1,IMP4,BOP1,EMG1,NOL6,NOP2,UTP20,RPP38,WDR12,LTV1,FTSJ3,UTP4,WDR36,FBL,NHP2,UTP15,BYSL
REAC	rRNA processing	REAC:R-HSA-72312	3.56391e-09	26	NOP14,PNO1,NIP7,GAR1,PWP2,NAT10,DIS3,GNL3,RRP7A,TSR1,IMP4,BOP1,EMG1,NOL6,NOP2,UTP20,RPP38,WDR12,LTV1,FTSJ3,UTP4,WDR36,FBL,NHP2,UTP15,BYSL
REAC	Major pathway of rRNA processing in the nucleolus and cytosol	REAC:R-HSA-6791226	3.76341e-07	22	NOP14,PNO1,NIP7,PWP2,DIS3,GNL3,RRP7A,TSR1,IMP4,BOP1,EMG1,NOL6,UTP20,RPP38,WDR12,LTV1,FTSJ3,UTP4,WDR36,FBL,UTP15,BYSL
REAC	Metabolism of RNA	REAC:R-HSA-8953854	2.292e-05	52	ZFP36,WDR77,NOP14,WDR4,PNO1,METTL1,NIP7,GAR1,PWP2,NAT10,DIS3,PUS7,GNL3,RRP7A,TSR1,IMP4,BOP1,NSUN6,EMG1,NOL6,NOP2,UTP20,TRMT1,RPP38,WDR12,LTV1,NT5C3B,FTSJ3,UTP4,WDR36,FBL,NHP2,UTP15,GEMIN5,BYSL,EIF4A1,POLR2E,MAPKAPK2,WDR43,GTF2H3,HSPB1,CHERP,PSMD14,SNRNP40,CPSF1,PSMD3,PDCD11,SNRPA,GSPT1,CNOT9,PSMD11,POLR2D
REAC	Transport of connexons to the plasma membrane	REAC:R-HSA-190872	0.0277522	2	TUBA4A,TUBA8
REAC	Microtubule-dependent trafficking of connexons from Golgi to the plasma membrane	REAC:R-HSA-190840	0.0277522	2	TUBA4A,TUBA8
REAC	Post-chaperonin tubulin folding pathway	REAC:R-HSA-389977	0.031861	2	TUBA4A,TUBA8
REAC	Formation of tubulin folding intermediates by CCT/TriC	REAC:R-HSA-389960	0.0333112	2	TUBA4A,TUBA8
REAC	Activation of AMPK downstream of NMDARs	REAC:R-HSA-9619483	0.0333879	2	TUBA4A,TUBA8
REAC	Pyruvate metabolism and Citric Acid (TCA) cycle	REAC:R-HSA-71406	0.0333879	6	CS,SLC16A3,IDH3A,PPARD,IDH2,SLC16A1
REAC	Cooperation of Prefoldin and TriC/CCT in actin and tubulin folding	REAC:R-HSA-389958	0.0346527	2	TUBA4A,TUBA8
REAC	RHO GTPases activate IQGAPs	REAC:R-HSA-5626467	0.0346527	2	TUBA4A,TUBA8
REAC	Sealing of the nuclear envelope (NE) by ESCRT-III	REAC:R-HSA-9668328	0.0346527	2	TUBA4A,TUBA8
REAC	Mitochondrial protein import	REAC:R-HSA-1268020	0.0362421	9	CS,ATP5MC1,TIMM9,TIMM8A,GRPEL1,TIMM50,TOMM5,TIMM13,TOMM20
REAC	Factors involved in megakaryocyte development and platelet production	REAC:R-HSA-983231	0.0362421	3	AKAP1,TUBA4A,TUBA8
REAC	Gap junction assembly	REAC:R-HSA-190861	0.0378888	2	TUBA4A,TUBA8
REAC	Aggrephagy	REAC:R-HSA-9646399	0.0411849	2	TUBA4A,TUBA8
REAC	Carboxyterminal post-translational modifications of tubulin	REAC:R-HSA-8955332	0.0411849	2	TUBA4A,TUBA8
REAC	Basigin interactions	REAC:R-HSA-210991	0.0411849	4	SLC7A5,SLC16A3,ATP1B3,SLC16A1
REAC	Virus Assembly and Release	REAC:R-HSA-168268	0.0411849	2	CALR,CANX
REAC	Assembly and cell surface presentation of NMDA receptors	REAC:R-HSA-9609736	0.0411849	2	TUBA4A,TUBA8
REAC	Recycling pathway of L1	REAC:R-HSA-437239	0.0411849	2	TUBA4A,TUBA8
REAC	Assembly of Viral Components at the Budding Site	REAC:R-HSA-168316	0.0411849	2	CALR,CANX
REAC	Gap junction trafficking	REAC:R-HSA-190828	0.0411849	2	TUBA4A,TUBA8
REAC	tRNA modification in the nucleus and cytosol	REAC:R-HSA-6782315	0.0411849	5	WDR4,METTL1,PUS7,NSUN6,TRMT1
REAC	Gap junction trafficking and regulation	REAC:R-HSA-157858	0.0412887	2	TUBA4A,TUBA8
REAC	COPI-independent Golgi-to-ER retrograde traffic	REAC:R-HSA-6811436	0.0447109	2	TUBA4A,TUBA8
REAC	HSP90 chaperone cycle for steroid hormone receptors (SHR)	REAC:R-HSA-3371497	0.0498857	2	TUBA4A,TUBA8

## Sheet: BAT atemp UP
source	term_name	term_id	FDR	intersection_size	intersections
GO:MF	aldehyde dehydrogenase (NAD+) activity	GO:0004029	0.000456651	7	ALDH1L1,ALDH2,ALDH9A1,ALDH1A3,ALDH1L2,ALDH3A2,ADH5
GO:MF	extracellular matrix structural constituent	GO:0005201	0.000531149	16	FMOD,COL28A1,COL4A6,CTHRC1,COL6A6,LUM,NPNT,FN1,COL4A5,COL7A1,CILP,COL21A1,ABI3BP,SRPX,TUFT1,COL3A1
GO:MF	aldehyde dehydrogenase [NAD(P)+] activity	GO:0004030	0.000751246	7	ALDH1L1,ALDH2,ALDH9A1,ALDH1A3,ALDH1L2,ALDH3A2,ADH5
GO:MF	integrin binding	GO:0005178	0.00831112	13	ISG15,CCN5,SPP1,CCN4,LGALS12,GPNMB,NPNT,FN1,SFRP2,ITGB4,IGF1,FAP,COL3A1
GO:MF	extracellular matrix structural constituent conferring tensile strength	GO:0030020	0.0124331	7	COL28A1,COL4A6,COL6A6,COL4A5,COL7A1,COL21A1,COL3A1
GO:MF	anion binding	GO:0043168	0.0141037	117	ABCC8,FFAR4,TDRD9,MX1,PCK1,GSTA1,FMO2,NOD2,ETNPPL,NOS2,MYH15,IQCA1,CAMK2B,GPT2,KIF4A,MAPK15,CNGA2,PPP5C,ACSS3,RASL10B,IFI44L,KCNJ11,BUB1B,SLC1A1,SIGLEC11,GBP6,TTK,ATP2A3,AOX1,MAST1,DHX58,UBE2C,ABCA6,CENPE,NTRK2,CAMKV,FBP1,AURKA,ABCG2,PFKFB1,NOX5,DNA2,DDX4,TOP2A,HNF4A,MST1R,CIITA,SHMT1,EPHB6,RAD54L,RRAD,CDKL1,MOK,ANXA13,RPS6KA6,KIF22,SESN3,ATP8B4,NAIP,ETNK2,KIF23,MOCOS,KIF15,IFIH1,NAA80,UBE2L6,SES…
GO:MF	glycine N-benzoyltransferase activity	GO:0047962	0.0287828	1	GLYAT
GO:MF	metallodipeptidase activity	GO:0070573	0.0351923	3	DPEP3,DPEP2,CPQ
GO:MF	superoxide-generating NADPH oxidase activator activity	GO:0016176	0.0355177	3	NOXO1,NOXA1,NCF4
GO:BP	extracellular matrix organization	GO:0030198	6.33175e-05	27	MELTF,FMOD,COL28A1,COL4A6,SPP1,NOXO1,VIT,OLFML2B,TLL1,HPN,WT1,LUM,KAZALD1,SMOC2,NPNT,FN1,SFRP2,ITGB4,COL4A5,ADAMTS7,ADAMTS6,COL7A1,COL21A1,MMP23B,MMP28,PAPLN,ABI3BP
GO:BP	extracellular structure organization	GO:0043062	6.65241e-05	27	MELTF,FMOD,COL28A1,COL4A6,SPP1,NOXO1,VIT,OLFML2B,TLL1,HPN,WT1,LUM,KAZALD1,SMOC2,NPNT,FN1,SFRP2,ITGB4,COL4A5,ADAMTS7,ADAMTS6,COL7A1,COL21A1,MMP23B,MMP28,PAPLN,ABI3BP
GO:BP	external encapsulating structure organization	GO:0045229	7.3397e-05	27	MELTF,FMOD,COL28A1,COL4A6,SPP1,NOXO1,VIT,OLFML2B,TLL1,HPN,WT1,LUM,KAZALD1,SMOC2,NPNT,FN1,SFRP2,ITGB4,COL4A5,ADAMTS7,ADAMTS6,COL7A1,COL21A1,MMP23B,MMP28,PAPLN,ABI3BP
GO:BP	regulation of metaphase/anaphase transition of cell cycle	GO:1902099	0.000169657	10	MAPK15,BUB1B,CENPF,TTK,UBE2C,CENPE,NDC80,DLGAP5,KNTC1,MAD2L1
GO:BP	metaphase/anaphase transition of cell cycle	GO:0044784	0.000232018	10	MAPK15,BUB1B,CENPF,TTK,UBE2C,CENPE,NDC80,DLGAP5,KNTC1,MAD2L1
GO:BP	regulation of chromosome separation	GO:1905818	0.000555864	10	MAPK15,BUB1B,CENPF,TTK,UBE2C,CENPE,NDC80,DLGAP5,KNTC1,MAD2L1
GO:BP	regulation of sister chromatid segregation	GO:0033045	0.000555864	10	MAPK15,BUB1B,CENPF,TTK,UBE2C,CENPE,NDC80,DLGAP5,KNTC1,MAD2L1
GO:BP	kinetochore organization	GO:0051383	0.00108991	6	CENPW,CENPF,CENPE,NDC80,DLGAP5,CENPT
GO:BP	chromosome separation	GO:0051304	0.00123926	11	MAPK15,BUB1B,CENPF,TTK,UBE2C,CENPE,NDC80,TOP2A,DLGAP5,KNTC1,MAD2L1
GO:BP	regulation of mitotic metaphase/anaphase transition	GO:0030071	0.00125688	9	BUB1B,CENPF,TTK,UBE2C,CENPE,NDC80,DLGAP5,KNTC1,MAD2L1
GO:BP	metaphase/anaphase transition of mitotic cell cycle	GO:0007091	0.00168425	9	BUB1B,CENPF,TTK,UBE2C,CENPE,NDC80,DLGAP5,KNTC1,MAD2L1
GO:BP	regulation of mitotic sister chromatid separation	GO:0010965	0.0022319	9	BUB1B,CENPF,TTK,UBE2C,CENPE,NDC80,DLGAP5,KNTC1,MAD2L1
GO:BP	negative regulation of macrophage apoptotic process	GO:2000110	0.00257553	3	NOD2,GHSR,IRF7
GO:BP	antiviral innate immune response	GO:0140374	0.00288073	3	CXCL10,MX1,IFIT1
GO:BP	mitotic sister chromatid separation	GO:0051306	0.00292703	9	BUB1B,CENPF,TTK,UBE2C,CENPE,NDC80,DLGAP5,KNTC1,MAD2L1
GO:BP	regulation of chromosome segregation	GO:0051983	0.00391346	10	MAPK15,BUB1B,CENPF,TTK,UBE2C,CENPE,NDC80,DLGAP5,KNTC1,MAD2L1
GO:BP	type I interferon signaling pathway	GO:0060337	0.00509217	9	IFI6,ISG15,MX1,IFIT1,XAF1,IRF7,IFIT3,ZBP1,WNT5A
GO:BP	cellular response to type I interferon	GO:0071357	0.005555	9	IFI6,ISG15,MX1,IFIT1,XAF1,IRF7,IFIT3,ZBP1,WNT5A
GO:BP	organic acid catabolic process	GO:0016054	0.00683248	27	PCK1,SARDH,NOS2,GPT2,ALDH1L1,HAAO,LEP,TST,SHMT1,UROC1,CPT1C,HOGA1,PCK2,CSAD,LDHD,ACAT2,QDPR,ASPA,ALDH1L2,IRS1,IDNK,HACL1,ALDH3A2,AIG1,ACAD8,MPST,ACAA1
GO:BP	kinetochore assembly	GO:0051382	0.00727639	5	CENPW,CENPF,CENPE,DLGAP5,CENPT
GO:BP	cell division	GO:0051301	0.0079757	33	CENPW,KIF4A,STOX1,BUB1B,CENPF,SPC24,CDCA8,ASPM,SUSD2,UBE2C,CENPE,MIS18BP1,AURKA,NDC80,CDCA3,CEP55,NOX5,TOP2A,ZBTB16,MDK,SFRP2,CENPT,CKAP2,SKA3,ANLN,KNTC1,MAD2L1,PARD3B,MLLT3,KIF23,CDC25B,FIGN,CNTRL
GO:BP	response to type I interferon	GO:0034340	0.00839234	8	IFI6,ISG15,MX1,IFIT1,XAF1,IRF7,IFIT3,ZBP1
GO:BP	sister chromatid segregation	GO:0000819	0.0130384	16	KIF4A,MAPK15,BUB1B,CENPF,CDCA8,TTK,UBE2C,CENPE,NDC80,TOP2A,DLGAP5,KNTC1,MAD2L1,KIF22,STAG3,KIF23
GO:BP	nuclear division	GO:0000280	0.0177812	26	TDRD9,KIF4A,MAPK15,BUB1B,CENPF,CDCA8,ASPM,MEI1,TTK,UBE2C,CENPE,AURKA,NDC80,WNT5A,DDX4,TOP2A,DLGAP5,RAD54L,ANLN,KNTC1,MAD2L1,KIF22,IGF1,STAG3,KIF23,CDC25B
GO:BP	chromosome segregation	GO:0007059	0.0178939	21	CENPW,KIF4A,MAPK15,BUB1B,CENPF,CDCA8,HJURP,TTK,UBE2C,CENPE,NDC80,TOP2A,DLGAP5,CENPT,SKA3,KNTC1,MAD2L1,KIF22,BRCA1,STAG3,KIF23
GO:BP	carboxylic acid catabolic process	GO:0046395	0.0199876	25	PCK1,SARDH,NOS2,GPT2,ALDH1L1,HAAO,LEP,SHMT1,UROC1,CPT1C,HOGA1,PCK2,CSAD,LDHD,ACAT2,QDPR,ASPA,ALDH1L2,IRS1,IDNK,HACL1,ALDH3A2,AIG1,ACAD8,ACAA1
GO:BP	centromere complex assembly	GO:0034508	0.0228999	7	CENPW,CENPF,HJURP,CENPE,MIS18BP1,DLGAP5,CENPT
GO:BP	ghrelin secretion	GO:0036321	0.0266886	2	FFAR4,GHSR
GO:BP	hormone secretion	GO:0046879	0.0320354	13	ABCC8,FFAR4,NNAT,NOS2,SPP1,GHSR,RBP4,RASL10B,KCNJ11,ILDR2,LEP,SNAP25,TAC1
GO:BP	organelle fission	GO:0048285	0.0330014	27	TDRD9,MX1,KIF4A,MAPK15,BUB1B,CENPF,CDCA8,ASPM,MEI1,TTK,UBE2C,CENPE,AURKA,NDC80,WNT5A,DDX4,TOP2A,DLGAP5,RAD54L,ANLN,KNTC1,MAD2L1,KIF22,IGF1,STAG3,KIF23,CDC25B
GO:BP	peptide hormone secretion	GO:0030072	0.0334698	11	ABCC8,FFAR4,NNAT,NOS2,GHSR,RBP4,RASL10B,KCNJ11,ILDR2,LEP,SNAP25
GO:BP	regulation of macrophage apoptotic process	GO:2000109	0.0353527	3	NOD2,GHSR,IRF7
GO:BP	response to virus	GO:0009615	0.036002	5	CYP1A1,CXCL10,IFI6,ISG15,MX1
GO:BP	regulation of hormone secretion	GO:0046883	0.0360123	12	ABCC8,FFAR4,NNAT,NOS2,SPP1,GHSR,RBP4,RASL10B,KCNJ11,LEP,SNAP25,TAC1
GO:BP	regulation of chemotaxis	GO:0050920	0.0392178	21	CXCL10,NOD2,C3AR1,ROBO2,CXCR4,TMEM102,WNT5A,SMOC2,MDK,IL16,ROBO1,MMP28,SEMA6C,SEMA3B,PLA2G7,SEMA4F,S100A14,PDGFD,PTK2B,PDGFRA,PLXNA4
GO:BP	peptide secretion	GO:0002790	0.0414054	11	ABCC8,FFAR4,NNAT,NOS2,GHSR,RBP4,RASL10B,KCNJ11,ILDR2,LEP,SNAP25
GO:BP	hormone transport	GO:0009914	0.0444297	13	ABCC8,FFAR4,NNAT,NOS2,SPP1,GHSR,RBP4,RASL10B,KCNJ11,ILDR2,LEP,SNAP25,TAC1
GO:BP	regulation of peptide hormone secretion	GO:0090276	0.0461415	10	ABCC8,FFAR4,NNAT,NOS2,GHSR,RBP4,RASL10B,KCNJ11,LEP,SNAP25
GO:BP	collagen fibril organization	GO:0030199	0.046714	10	FMOD,COL28A1,COL4A6,TLL1,LUM,SFRP2,ITGB4,COL4A5,COL7A1,COL21A1
GO:BP	negative regulation of peptide hormone secretion	GO:0090278	0.0494965	5	ABCC8,FFAR4,GHSR,KCNJ11,LEP
GO:CC	external encapsulating structure	GO:0030312	5.89299e-09	40	WNT6,CCN5,FMOD,COL28A1,COL4A6,CTHRC1,LRRC17,COL6A6,CCN4,VIT,OLFML2B,ATRNL1,BMPER,LUM,RTN4RL1,KAZALD1,WNT5A,SMOC2,NPNT,MDK,ANGPTL1,FN1,SFRP2,ITGB4,COL4A5,ADAMTS7,ADAMTS6,CHAD,COL7A1,CILP,PKHD1L1,COL21A1,MMP23B,MMP28,PAPLN,ABI3BP,SRPX,SEMA3B,SERPING1,COL3A1
GO:CC	extracellular matrix	GO:0031012	2.16e-08	39	WNT6,CCN5,FMOD,COL28A1,COL4A6,CTHRC1,LRRC17,COL6A6,CCN4,VIT,OLFML2B,ATRNL1,BMPER,LUM,RTN4RL1,KAZALD1,WNT5A,SMOC2,NPNT,MDK,ANGPTL1,FN1,SFRP2,ITGB4,COL4A5,ADAMTS7,ADAMTS6,CHAD,COL7A1,CILP,COL21A1,MMP23B,MMP28,PAPLN,ABI3BP,SRPX,SEMA3B,SERPING1,COL3A1
GO:CC	cell periphery	GO:0071944	2.59382e-06	159	ABCC8,GAS2L2,CXCL10,FFAR4,IFI6,RHBDL1,DPEP3,MX1,KRT19,MELTF,WNT6,SLC47A2,C4BPA,CCN5,ACKR4,KCNK2,CFB,LRRN4,SLC22A18,TNFRSF19,FMOD,COL28A1,COL4A6,SLC4A11,CTHRC1,LRRC17,XPNPEP2,COL6A6,NOD2,SLC13A4,NOS2,CA11,TRO,GHSR,RIMS3,UPK3B,CCN4,NOXO1,GABBR2,SCTR,SORL1,NOXA1,CNGA2,C3AR1,GPNMB,PPP5C,SLC2A11,CGN,STOX1,RASL10B,KCNJ11,SLC47A1,SMIM1,ROBO2,PIK3IP1,MBP,ASPM,GRID2IP,SLC1A1,SIGLEC11,NTSR2,VIT,OLFML2B,CAT…
GO:CC	collagen-containing extracellular matrix	GO:0062023	2.30935e-05	33	FMOD,COL28A1,COL4A6,CTHRC1,COL6A6,VIT,ATRNL1,LUM,KAZALD1,WNT5A,SMOC2,NPNT,MDK,ANGPTL1,FN1,SFRP2,ITGB4,COL4A5,COL7A1,CILP,COL21A1,MMP23B,MMP28,ABI3BP,SRPX,SEMA3B,SERPING1,COL3A1,LGALS3BP,MGP,CCDC80,PLSCR1,LTBP3
GO:CC	chromosome, centromeric region	GO:0000775	6.64027e-05	16	CENPW,BUB1B,CENPF,SPC24,CDCA8,HJURP,TTK,CENPE,MIS18BP1,NDC80,TOP2A,CENPT,SKA3,KNTC1,MAD2L1,KIF22
GO:CC	kinetochore	GO:0000776	0.000637322	12	CENPW,BUB1B,CENPF,SPC24,TTK,CENPE,NDC80,CENPT,SKA3,KNTC1,MAD2L1,KIF22
GO:CC	condensed chromosome, centromeric region	GO:0000779	0.00146656	12	CENPW,BUB1B,CENPF,SPC24,TTK,CENPE,NDC80,CENPT,SKA3,KNTC1,MAD2L1,KIF22
GO:CC	basement membrane	GO:0005604	0.00702892	9	COL28A1,COL4A6,ATRNL1,SMOC2,NPNT,FN1,ITGB4,COL4A5,COL7A1
GO:CC	collagen trimer	GO:0005581	0.00965497	9	COL28A1,COL4A6,CTHRC1,COL6A6,EDA,LUM,COL4A5,COL7A1,COL21A1
GO:CC	plasma membrane region	GO:0098590	0.014005	71	FFAR4,MX1,KRT19,KCNK2,SLC22A18,SLC4A11,NOD2,CA11,GHSR,RIMS3,GABBR2,CNGA2,KCNJ11,SLC47A1,ROBO2,ASPM,GRID2IP,SLC1A1,CNTN1,SNAP25,HPN,MXRA8,GRIK4,PTPRD,ABCG2,SLC4A5,CEP55,F2RL2,MST1R,FN1,ITGB4,AKAP7,GASK1A,SLC7A7,ADCYAP1R1,ANXA13,DMTN,NAIP,TTC8,PARD3B,FAP,TNK2,CHRNE,DDX58,FLRT3,SEMA4F,RGS7BP,NIPSNAP1,SHC4,NDRG4,ITGA8,LRP4,MYO7A,SLC7A9,SVIL,TJP1,KANK1,ENPP1,SORCS2,IRS1,KLHDC8B,NLGN3,SLC40A1,EFNA5,SGI…
GO:CC	condensed chromosome	GO:0000793	0.016629	15	CENPW,BUB1B,CENPF,SPC24,TTK,CENPE,NDC80,TOP2A,CENPT,SKA3,KNTC1,MAD2L1,KIF22,BRCA1,STAG3
GO:CC	chromosomal region	GO:0098687	0.0192353	27	CENPW,BUB1B,CENPF,SPC24,CDCA8,HJURP,TTK,CENPE,MIS18BP1,NDC80,DNA2,TOP2A,CENPT,SKA3,KNTC1,MAD2L1,KIF22,STAG3,NCAPD3,SGO1,RECQL4,RASSF2,SUV39H1,ZNF618,BRCA2,MRE11,DSN1
GO:CC	complex of collagen trimers	GO:0098644	0.0197319	5	COL4A6,LUM,COL4A5,COL7A1,COL3A1
GO:CC	intrinsic component of plasma membrane	GO:0031226	0.0410606	46	ABCC8,FFAR4,RHBDL1,MELTF,ACKR4,KCNK2,LRRN4,NOD2,SLC13A4,TRO,GHSR,NOXO1,GABBR2,SORL1,NOXA1,C3AR1,GPNMB,KCNJ11,SLC1A1,NTSR2,CNTN1,SNAP25,HPN,PCDH19,NTRK2,EDA,GRIK4,PTPRD,RNF43,TNFSF10,NCF4,SCN7A,RTN4RL1,SLC7A10,NPNT,F2RL2,MST1R,PCDH9,EPHB6,CSF2RB,ITGB4,CPT1C,TENM1,PLA2R1,SLC7A7,ADCYAP1R1
GO:CC	interstitial matrix	GO:0005614	0.0426386	4	VIT,KAZALD1,ABI3BP,CCDC80
REAC	Interferon alpha/beta signaling	REAC:R-HSA-909733	0.0144376	4	IFI6,ISG15,MX1,IFIT1
REAC	Defective ABCC8 can cause hypo- and hyper-glycemias	REAC:R-HSA-5683177	0.039967	2	ABCC8,KCNJ11

## Sheet: BAT atemp DOWN
source	term_name	term_id	FDR	intersection_size	intersections
GO:MF	RNA binding	GO:0003723	1.34867e-11	180	AKAP1,SLC16A3,PIWIL3,ZFP36,TFRC,MANF,CSDC2,HSP90B1,RRS1,SERPINH1,PNO1,NIP7,GAR1,CCDC86,PABPC1L,RRP12,CALR,SUGP2,TSR1,WDR46,SRSF1,ASS1,PDIA4,RPF2,ATXN2L,NSUN6,SRF,CPSF6,MBNL3,LSM11,NOP14,METTL1,MYBBP1A,TARDBP,FUBP1,SRSF2,NAT10,PUS7,ACTN1,MAK16,ENO1,CSRP1,ZNF207,GRWD1,DIS3,RSL1D1,FLNA,HSPB1,PWP2,RRP8,TMSB4X,YRDC,NABP1,GNL3,RBM34,AHCYL1,PPRC1,KHDC4,CCT6A,NUFIP2,NOP16,PDIA3,NIFK,SCAF1,PRPF3,BOP1,HNRN…
GO:MF	unfolded protein binding	GO:0051082	1.09257e-07	25	HSPA5,HYOU1,HSP90B1,SERPINH1,CALR,UGGT1,NACAD,DNAJB11,DNAJA4,GRPEL1,CCT6A,TUBB4B,CANX,HSP90AA1,HSPA13,PTGES3,TIMM10B,RUVBL2,CCT5,PFDN6,LMAN1,PDRG1,PFDN2,ERN1,TOMM20
GO:MF	enzyme binding	GO:0019899	4.76285e-06	166	TUBA4A,ZFP36,AKAP12,FRMD5,NR4A3,HSPA5,ADAMTS4,TFRC,SMAD7,ACTA2,TRIB2,RAPGEF4,TRAF5,ATP1B3,PFKL,SLC12A4,LDHA,SLC2A1,ECM1,HSP90B1,CCND1,TIMP4,BCL2L1,DAAM2,SLC9A3R2,VCL,ETS1,FEZ1,CALR,UBASH3B,TIMP3,ATP1A1,ADORA2A,SPRED3,SYTL2,RILP,SRSF1,MLEC,SDC4,SNTA1,PPP1R15A,SRF,ITGA1,GCH1,SPRED1,ERLIN1,NOP14,SDF2L1,BAG5,CRY1,SRSF2,NAT10,PUS7,PPP1R3D,ENO1,CAPN2,MYO1C,FLNA,HSPB1,CCNYL1,FZD4,HGS,TMSB4X,RNF152,NCOR2…
GO:MF	protein binding	GO:0005515	3.99926e-05	846	AKAP1,APLN,CCL1,TUB,PHOSPHO1,ACOX2,CACNA1G,TUBA4A,GPR17,SPRY4,UPP1,IL1RN,NTNG2,CBARP,SLC16A5,DNAH2,ARMC7,CCN2,RHBDL2,SLC16A3,LOXL4,CCDC151,NTN3,CNKSR3,P4HA1,SMPD3,STAC,ACOT7,CXCL12,PIWIL3,ZFP36,TINAGL1,RARRES1,PNMA2,MTHFD1L,ANKRD37,TM4SF18,GK,AJUBA,FABP3,ACE2,AKAP12,ADAMTS1,KLHDC7A,DYNC1I1,FRMD5,NR4A3,HSPA5,ETV4,MASP1,COL8A2,NOS3,FABP5,FLT1,SAPCD2,ADAMTS4,MAFF,CRELD2,AQP3,GAL,BMP6,IL7R,FFAR3,ERO1…
GO:MF	kinase binding	GO:0019900	0.000826921	71	TUBA4A,ZFP36,FRMD5,NR4A3,TFRC,ACTA2,TRIB2,PFKL,SLC12A4,LDHA,SLC2A1,CCND1,BCL2L1,FEZ1,ATP1A1,SPRED3,SRSF1,SDC4,PPP1R15A,GCH1,SPRED1,BAG5,CRY1,SRSF2,FLNA,HSPB1,CCNYL1,PDGFRB,WWC2,XBP1,SRCIN1,PTPN23,RPS6KA3,DAB2IP,PGAM1,HDAC7,GPRC5B,CBL,ITGB1,RHOBTB2,HSP90AA1,MARCKS,SRSF5,MAP3K7,SH2B3,WNK1,PRMT1,ATF4,MAP3K2,GSK3A,PLK1,STAT3,CAVIN3,ARHGDIA,MOB1B,MAVS,DUSP7,ZPR1,ATP2B4,CNOT9,PPP1CC,ACTB,CALM1,MIDN,STR…
GO:MF	protein disulfide isomerase activity	GO:0003756	0.00236272	6	CRELD2,ERO1A,PDIA4,PDIA6,ERP44,PDIA3
GO:MF	intramolecular oxidoreductase activity, transposing S-S bonds	GO:0016864	0.00236272	6	CRELD2,ERO1A,PDIA4,PDIA6,ERP44,PDIA3
GO:MF	organic hydroxy compound transmembrane transporter activity	GO:1901618	0.00334699	6	SLC16A3,AQP3,ABCC3,SLC10A1,SLC18A2,SLC51B
GO:MF	protein kinase binding	GO:0019901	0.00363903	63	TUBA4A,ZFP36,FRMD5,NR4A3,TFRC,ACTA2,TRIB2,SLC12A4,CCND1,BCL2L1,FEZ1,ATP1A1,SPRED3,SRSF1,SDC4,PPP1R15A,GCH1,SPRED1,BAG5,CRY1,SRSF2,FLNA,HSPB1,CCNYL1,PDGFRB,XBP1,SRCIN1,PTPN23,RPS6KA3,DAB2IP,PGAM1,HDAC7,GPRC5B,CBL,ITGB1,RHOBTB2,HSP90AA1,MARCKS,SRSF5,MAP3K7,SH2B3,WNK1,PRMT1,ATF4,MAP3K2,GSK3A,PLK1,STAT3,CAVIN3,ARHGDIA,MAVS,DUSP7,ZPR1,ATP2B4,PPP1CC,ACTB,CALM1,STRIP1,DNAJC3,MAPRE1,IQGAP1,RHOB,CCNY
GO:MF	G protein-coupled peptide receptor activity	GO:0008528	0.00613095	9	HCRTR1,GPR17,NMUR1,GAL,NLRP6,AGTR1,CYSLTR2,CYSLTR1,GIPR
GO:MF	chaperone binding	GO:0051087	0.00719992	16	HSPA5,HYOU1,CALR,ATP1A1,FICD,SDF2L1,BAG5,TIMM9,DNAJA4,GRPEL1,VWF,STIP1,WRAP53,PTGES3,BAX,PFDN6
GO:MF	long-chain fatty acid transporter activity	GO:0005324	0.00750265	4	FABP3,FABP5,SLC2A1,FABP4
GO:MF	peptide receptor activity	GO:0001653	0.0075852	9	HCRTR1,GPR17,NMUR1,GAL,NLRP6,AGTR1,CYSLTR2,CYSLTR1,GIPR
GO:MF	G protein-coupled receptor binding	GO:0001664	0.00762811	3	APLN,CCL1,TUB
GO:MF	monocarboxylic acid transmembrane transporter activity	GO:0008028	0.00801899	6	SLC6A6,SLC16A5,SLC16A3,ABCC3,SLC10A1,SLC51B
GO:MF	intramolecular oxidoreductase activity	GO:0016860	0.00815578	10	CRELD2,ERO1A,MRI1,RPIA,PDIA4,PDIA6,ERP44,PDIA3,MPI,PTGES3
GO:MF	fatty acid binding	GO:0005504	0.013846	5	ACOX2,FABP3,FABP5,PPARD,FABP4
GO:MF	ribonucleoprotein complex binding	GO:0043021	0.0173402	21	HSPA5,CPSF6,WDR12,BOP1,DDX5,UHMK1,PHF6,SNRPD1,TIMM50,YBX3,EIF2S1,GEMIN5,SNRPB,ABCE1,NMD3,SNRPC,DHX33,ETF1,NCLN,DHX9,YTHDF1
GO:MF	transporter activity	GO:0005215	0.0183866	27	CACNA1G,SLC6A6,TRPM3,SLC16A5,SLC16A3,FABP3,NDUFA4L2,FABP5,AQP3,SLC2A3,GJA9,ABCC3,KCNG2,ATP1B3,SLC7A5,SLC12A4,SLC35B4,SLC10A1,SLC18A2,SLC2A1,GJA1,TMC8,FABP4,SLC51B,SLC17A9,ATP13A3,GLTPD2
GO:MF	carboxylic acid binding	GO:0031406	0.0191588	9	ACOX2,P4HA1,FABP3,NOS3,FABP5,EGLN3,GOT1,PPARD,FABP4
GO:MF	heterocyclic compound binding	GO:1901363	0.0232939	386	AKAP1,ACOX2,TUBA4A,DNAH2,SLC16A3,ACOT7,PIWIL3,ZFP36,MTHFD1L,GK,NR4A3,HSPA5,ONECUT2,ETV4,NOS3,FLT1,MAFF,SPATA5,TFRC,SMAD7,SRL,CCN1,ACTA2,HYOU1,BHLHE40,TRIB2,ABCC3,RAPGEF4,NLRP6,MANF,CSDC2,WDR77,KIF26B,ACTG2,PFKL,SOX8,ARL8A,FGFR3,ATF3,TAF4B,MARS2,LDHA,GOT1,PNP,AMHR2,SGK1,SMAD9,PPARD,HSP90B1,RRS1,SERPINH1,AK4,ATP13A3,KLF7,MICAL2,PNO1,HSPH1,NIP7,GAR1,ZNF366,TFAP2E,CCDC86,ETS1,PABPC1L,KDR,TEAD4,ARL5A,…
GO:MF	basal transcription machinery binding	GO:0001098	0.0277248	13	SCAF1,LLPH,FBL,RUVBL2,WDR43,SCAF4,DRAP1,RPRD1A,RPRD1B,PAF1,CDC73,DHX9,NCOA3
GO:MF	basal RNA polymerase II transcription machinery binding	GO:0001099	0.0277248	13	SCAF1,LLPH,FBL,RUVBL2,WDR43,SCAF4,DRAP1,RPRD1A,RPRD1B,PAF1,CDC73,DHX9,NCOA3
GO:MF	organic cyclic compound binding	GO:0097159	0.0347926	389	AKAP1,ACOX2,TUBA4A,DNAH2,SLC16A3,ACOT7,PIWIL3,ZFP36,MTHFD1L,GK,NR4A3,HSPA5,ONECUT2,ETV4,NOS3,FLT1,MAFF,SPATA5,TFRC,SMAD7,SRL,CCN1,ACTA2,HYOU1,BHLHE40,TRIB2,ABCC3,RAPGEF4,NLRP6,MANF,CSDC2,WDR77,KIF26B,ACTG2,PFKL,SOX8,ARL8A,FGFR3,ADRA2B,ATF3,TAF4B,MARS2,LDHA,GOT1,PNP,AMHR2,SGK1,SMAD9,PPARD,HSP90B1,RRS1,SERPINH1,AK4,ATP13A3,KLF7,MICAL2,PNO1,HSPH1,NIP7,GAR1,ZNF366,TFAP2E,CCDC86,ETS1,PABPC1L,KDR,TEAD4…
GO:MF	RNA polymerase binding	GO:0070063	0.0376304	13	ZFP36,SCAF1,STOM,NEDD4,WDR43,SCAF4,RPRD1A,RPRD1B,PAF1,SPTY2D1,CDC73,DHX9,NCOA3
GO:MF	cysteinyl leukotriene receptor activity	GO:0001631	0.0405401	2	CYSLTR2,CYSLTR1
GO:MF	monosaccharide binding	GO:0048029	0.0425922	10	P4HA1,SLC2A3,PFKL,EGLN3,ENG,RPIA,GNPNAT1,EGLN1,HK1,CLN5
GO:BP	ribonucleoprotein complex biogenesis	GO:0022613	2.21731e-10	69	WDR77,RRS1,NIP7,GAR1,RRP12,TSR1,WDR46,SRSF1,RPF2,MPV17L2,CPSF6,LTV1,NOP14,WDR12,MYBBP1A,NAT10,MAK16,DIS3,RSL1D1,PWP2,RRP8,RRP15,KHDC4,NOP16,NIFK,PRPF3,BOP1,NOL6,IMP4,NOP9,WDR36,SNRPF,HSP90AA1,SNRPD1,SRSF5,DENR,PTGES3,MRTO4,MRPL20,FTSJ3,FBL,DDX56,TRMT61B,BYSL,NHP2,RUVBL2,GEMIN5,SNRPB,PDCD11,ABCE1,WDR43,POLR2D,PA2G4,TAF9,UTP4,NMD3,SNRPC,SF3A2,MTERF3,SNRPD3,EXOSC8,TRMT112,NOB1,UTP6,CDC73,DHX9,ISG20L…
GO:BP	RNA processing	GO:0006396	2.37198e-10	114	CSDC2,WDR77,RRS1,GAR1,PABPC1L,RRP12,SUGP2,TSR1,WDR46,SRSF1,RPF2,BCDIN3D,NSUN6,CPSF6,MBNL3,LSM11,NOP14,METTL1,WDR12,MAP2K1,PDE12,TARDBP,SRSF2,NAT10,PUS7,MAK16,INTS2,DIS3,RSL1D1,PWP2,RRP8,RRP15,AHCYL1,KHDC4,NCOR2,NIFK,SCAF1,PRPF3,BOP1,HNRNPA3,JMJD6,DDX5,ATXN1,PTBP1,NOL6,DPH3,GTF2H3,IMP4,NOP9,WDR36,SNRPF,FTSJ1,SNRPA,SNRPD1,INTS1,SRSF5,MRTO4,RNGTT,CCNH,FTSJ3,CPSF1,FBL,SNRNP40,RTCA,DDX56,TRMT61B,CSTF3…
GO:BP	circulatory system process	GO:0003013	3.32146e-09	35	APLN,CACNA1G,SLC6A6,CCN2,CXCL12,ACE2,AKAP12,GPR4,NOS3,FABP5,BMP6,FFAR3,FGF12,SLC2A3,TFRC,SMAD7,ACTA2,ABCC3,AGTR1,KCNG2,ATP1B3,SLC7A5,VEGFA,ADRA2B,SLC2A1,SGK1,GJA1,ENPEP,P2RY2,LNPEP,NEDD4L,ENG,ATP1A1,ADORA2A,FGF13
GO:BP	protein folding	GO:0006457	6.30583e-09	41	HSPA5,ERO1A,HSP90B1,HSPH1,CALR,UGGT1,PDIA4,MLEC,SDF2L1,BAG5,DNAJB11,PDIA6,DNAJA4,GRPEL1,HSPB1,CHCHD4,CCT6A,DNAJC24,ERP44,PDIA3,DNAJB14,CHORDC1,CANX,MESD,HSP90AA1,HSPA13,HSPBP1,PTGES3,PPIL1,RUVBL2,DNAJC25,CCT5,ATF6,PDCD5,PFDN6,LMAN1,PDRG1,PFDN2,DNAJC3,FKBP4,MOGS
GO:BP	response to topologically incorrect protein	GO:0035966	6.74106e-09	36	HSPA5,ERO1A,HYOU1,MANF,ATF3,HSP90B1,CCND1,SERPINH1,HSPH1,CALR,UGGT1,PPP1R15A,FICD,GOSR2,SDF2L1,DNAJB11,PDIA6,HSPB1,ERP44,TMEM33,EDEM1,DNAJB14,XBP1,SRPRB,DAB2IP,CANX,HSP90AA1,HSPA13,RNF121,HSPA4,ATF4,GSK3A,BAX,EIF2S1,ATF6,STT3B
GO:BP	response to endoplasmic reticulum stress	GO:0034976	2.26547e-08	48	HSPA5,ERO1A,HYOU1,MANF,ATF3,HSP90B1,CCND1,RASGRF2,BCL2L1,CALR,UGGT1,PDIA4,PPP1R15A,ERLIN1,FICD,GOSR2,SDF2L1,DNAJB11,TARDBP,PDIA6,LPCAT3,UFM1,ERP44,TMEM33,EDEM1,PDIA3,DNAJB14,XBP1,SRPRB,DAB2IP,CANX,RNF121,ATF4,GSK3A,BAX,EIF2S1,ATF6,RNFT1,STT3B,SEC16A,SELENOK,EIF4G1,DNAJC3,ERN1,UBE4A,TXNDC12,UBA5,TLN1
GO:BP	response to unfolded protein	GO:0006986	2.28409e-08	33	HSPA5,ERO1A,HYOU1,MANF,ATF3,HSP90B1,CCND1,SERPINH1,HSPH1,CALR,PPP1R15A,FICD,GOSR2,DNAJB11,PDIA6,HSPB1,ERP44,TMEM33,EDEM1,XBP1,SRPRB,DAB2IP,CANX,HSP90AA1,HSPA13,RNF121,HSPA4,ATF4,GSK3A,BAX,EIF2S1,ATF6,STT3B
GO:BP	vascular process in circulatory system	GO:0003018	5.74886e-08	18	APLN,SLC6A6,ACE2,AKAP12,GPR4,NOS3,FABP5,BMP6,SLC2A3,TFRC,ACTA2,ABCC3,AGTR1,SLC7A5,VEGFA,ADRA2B,SLC2A1,GJA1
GO:BP	endoplasmic reticulum unfolded protein response	GO:0030968	1.50043e-06	27	HSPA5,ERO1A,HYOU1,ATF3,HSP90B1,CCND1,CALR,PPP1R15A,FICD,GOSR2,DNAJB11,PDIA6,TMEM33,EDEM1,XBP1,SRPRB,DAB2IP,CANX,RNF121,ATF4,GSK3A,BAX,EIF2S1,ATF6,DNAJC3,ERN1,TLN1
GO:BP	cellular response to topologically incorrect protein	GO:0035967	2.3717e-06	28	HSPA5,ERO1A,HYOU1,ATF3,HSP90B1,CCND1,CALR,UGGT1,PPP1R15A,FICD,GOSR2,SDF2L1,DNAJB11,PDIA6,TMEM33,EDEM1,DNAJB14,XBP1,SRPRB,DAB2IP,CANX,HSPA13,RNF121,ATF4,GSK3A,BAX,EIF2S1,ATF6
GO:BP	mRNA metabolic process	GO:0016071	2.8797e-06	92	ZFP36,TRAF5,CSDC2,WDR77,PSMA8,PABPC1L,SUGP2,SRSF1,NT5C3B,CPSF6,MBNL3,LSM11,PDE12,TARDBP,SRSF2,PUS7,DIS3,FLNA,HSPB1,AHCYL1,KHDC4,SCAF1,PRPF3,HNRNPA3,JMJD6,DDX5,HIPK3,PTBP1,GTF2H3,SNRPF,SNRPA,GSPT1,SNRPD1,SRSF5,MRTO4,SMG5,RNGTT,PSMD14,CCNH,YBX3,CPSF1,SNRNP40,ATF4,TRMT61B,CSTF3,PSMA5,PPIL1,PSMD11,PSMD12,PSMD3,RBMX,STAT3,PSMC4,GEMIN5,SNRPB,PDCD11,METTL3,RC3H2,SCAF4,ZPR1,POLR2D,CNOT9,SYNCRIP,RPRD1A,ZN…
GO:BP	blood circulation	GO:0008015	4.3652e-06	28	APLN,CACNA1G,CCN2,CXCL12,ACE2,AKAP12,GPR4,NOS3,BMP6,FFAR3,FGF12,SMAD7,ACTA2,AGTR1,KCNG2,ATP1B3,VEGFA,ADRA2B,SGK1,GJA1,ENPEP,P2RY2,LNPEP,NEDD4L,ENG,ATP1A1,ADORA2A,FGF13
GO:BP	regulation of biological quality	GO:0065008	4.96016e-06	97	AKAP1,APLN,CCL1,TUB,ACOX2,HCRTR1,CACNA1G,GPR17,IL1RN,NTNG2,CCN2,SMPD3,CXCL12,ZFP36,FABP3,ACE2,AKAP12,GPR4,NR4A3,NOS3,FABP5,MAFF,AQP3,GAL,BMP6,IL7R,FFAR3,ERO1A,FGF12,TFRC,GADD45G,TLCD2,SMAD7,ACTA2,RAPGEF4,TRAF5,NLRP6,AGTR1,KCNG2,CSDC2,ATP1B3,CPT1A,MDGA1,DISC1,PFKL,SLC7A5,SOX8,RDH13,VEGFA,LIMD1,ADRA2B,SYT7,SLC12A4,ITGA2,SPTB,GOT1,SLC18A2,SLC2A1,SGK1,PPARD,HSP90B1,GJA1,CCND1,TMC8,CYSLTR1,RASGRF2,GPR…
GO:BP	ribosome biogenesis	GO:0042254	7.46119e-06	46	RRS1,NIP7,GAR1,RRP12,TSR1,WDR46,RPF2,MPV17L2,LTV1,NOP14,WDR12,MYBBP1A,NAT10,MAK16,DIS3,RSL1D1,PWP2,RRP8,RRP15,NOP16,NIFK,BOP1,NOL6,IMP4,NOP9,WDR36,MRTO4,MRPL20,FTSJ3,FBL,DDX56,TRMT61B,BYSL,NHP2,PDCD11,ABCE1,WDR43,PA2G4,UTP4,NMD3,MTERF3,EXOSC8,TRMT112,NOB1,UTP6,ISG20L2
GO:BP	anatomical structure morphogenesis	GO:0009653	8.66659e-06	90	APLN,PHOSPHO1,SPRY4,IL1RN,NTNG2,CCN2,NTN3,SMPD3,CXCL12,MTHFD1L,AJUBA,ADAMTS1,GPR4,NR4A3,HSPA5,ONECUT2,COL8A2,NOS3,FLT1,SAPCD2,AQP3,BMP6,IL7R,TFRC,SMAD7,RAPH1,CCN1,ACTA2,AGTR1,DISC1,KIF26B,ACTG2,SOX8,RDH13,VEGFA,CPM,LIMD1,FGFR3,AMOTL2,ITGA2,CNMD,SPTB,SDK2,AMHR2,SGK1,SMAD9,ECM1,GJA1,SERPINH1,PSMA8,TMEFF1,KLF7,MICAL2,BCL2L1,ENPEP,ADAMTS12,ID1,VCL,ETS1,KDR,TEAD4,FEZ1,MSX1,CALR,NEDD4L,ENG,SPRY1,PLXNA2…
GO:BP	cell-substrate adhesion	GO:0031589	9.50028e-06	33	SPRY4,NTNG2,CCN2,AJUBA,ONECUT2,CCN1,DISC1,VEGFA,ITGA2,PPARD,ADAMTS12,ID1,VCL,KDR,CALR,LAMC3,SDC4,SRF,ITGA1,ACTN1,LIMS2,FLNA,FZD4,PLAU,VWF,DLC1,ADAM15,SMAD6,SRCIN1,ACTN4,SLC9A1,L1CAM,PPM1F
GO:BP	hormone transport	GO:0009914	1.12654e-05	18	APLN,IL1RN,SMPD3,GAL,BMP6,FFAR3,RAPGEF4,AGTR1,KCNG2,CPT1A,PFKL,SLC7A5,SYT7,SLC2A1,PPARD,GJA1,GIPR,KLF7
GO:BP	cellular response to unfolded protein	GO:0034620	1.17841e-05	28	HSPA5,ERO1A,HYOU1,ATF3,HSP90B1,CCND1,CALR,PPP1R15A,FICD,GOSR2,DNAJB11,PDIA6,TMEM33,EDEM1,XBP1,SRPRB,DAB2IP,CANX,HSPA13,RNF121,ATF4,GSK3A,BAX,EIF2S1,ATF6,DNAJC3,ERN1,TLN1
GO:BP	regulation of localization	GO:0032879	1.48576e-05	111	APLN,CCL1,TUB,CACNA1G,NTNG2,CBARP,CNKSR3,SMPD3,STAC,CXCL12,ZFP36,AJUBA,FABP3,ACE2,AKAP12,ADAMTS1,FRMD5,NR4A3,HSPA5,ONECUT2,NOS3,FABP5,FLT1,SAPCD2,GAL,BMP6,FFAR3,ERO1A,FGF12,TFRC,SMAD7,CCN1,RAPGEF4,NLRP6,AGTR1,KCNG2,ATP1B3,CPT1A,PFKL,VEGFA,ADRA2B,SYT7,AMOTL2,ITGA2,SLC10A1,SLC2A1,SGK1,ECM1,PPARD,GJA1,RASGRF2,SLC51B,GIPR,KLF7,BCL2L1,VCL,ETS1,KDR,P2RY2,FEZ1,CALR,NEDD4L,ENG,UBASH3B,KCNAB3,ATP1A1,PLXNA…
GO:BP	ncRNA metabolic process	GO:0034660	2.2215e-05	63	MARS2,RRS1,GAR1,RRP12,TSR1,WDR46,RPF2,BCDIN3D,EEF1E1,NSUN6,NOP14,METTL1,WDR12,NAT10,PUS7,MAK16,INTS2,DIS3,RSL1D1,PWP2,RRP8,RRP15,NIFK,BOP1,NOL6,DPH3,IMP4,NOP9,WDR36,FTSJ1,INTS1,MRTO4,FTSJ3,CPSF1,FBL,DDX56,TRMT61B,BYSL,NHP2,VARS,YARS,STAT3,OSGEPL1,PDCD11,METTL3,FARSB,RC3H2,WDR43,PA2G4,DUS3L,UTP4,HRAS,KHSRP,EXOSC8,HNRNPA2B1,TRMT112,NOB1,UTP6,TRIR,DIS3L2,RTCB,URM1,RIOK2
GO:BP	animal organ development	GO:0048513	3.80227e-05	94	APLN,TUB,PHOSPHO1,CACNA1G,SPRY4,NTNG2,CCN2,NTN3,SMPD3,CXCL12,ZFP36,MTHFD1L,ADAMTS1,GPR4,NR4A3,HSPA5,ONECUT2,ETV4,COL8A2,NOS3,FLT1,SAPCD2,MAFF,AQP3,GAL,BMP6,IL7R,SPATA5,ERO1A,FGF12,TFRC,SHROOM4,SMAD7,CCN1,CAVIN4,ACTA2,AGTR1,PCDH18,CPT1A,MDGA1,DISC1,WDR77,KIF26B,ACTG2,SOX8,RDH13,VEGFA,FGFR3,ATF3,ITGA2,CNMD,LDHA,PNP,SDK2,SLC2A1,ECM1,PPARD,GJA1,CCND1,SERPINH1,PSMA8,AK4,GIPR,TMEFF1,KLF7,MICAL2,XYLT1,B…
GO:BP	hormone secretion	GO:0046879	4.56304e-05	17	APLN,IL1RN,SMPD3,GAL,BMP6,FFAR3,RAPGEF4,AGTR1,KCNG2,CPT1A,PFKL,SYT7,SLC2A1,PPARD,GJA1,GIPR,KLF7
GO:BP	secretion	GO:0046903	6.75402e-05	88	APLN,CACNA1G,TUBA4A,IL1RN,CBARP,CCN2,SMPD3,CXCL12,NR4A3,FABP5,GAL,BMP6,FFAR3,SLC2A3,ABCC3,RAPGEF4,NLRP6,AGTR1,KCNG2,MANF,CPT1A,PFKL,VEGFA,ARL8A,ADRA2B,SYT7,SLC10A1,PNP,SLC2A1,SGK1,ECM1,PPARD,GJA1,CCND1,SLC51B,SLC17A9,GIPR,KLF7,VCL,P2RY2,ENG,TIMP3,ADORA2A,GIT1,ANXA3,SYTL2,PDIA4,MLEC,SDC4,ENDOD1,PRRT2,TMC6,TBX3,TARDBP,CRY1,ACTN1,CD68,FLNA,PHACTR2,FZD4,HGS,PIK3C2A,TMSB4X,NCOR2,STK10,ERP44,PGM2,PLAU,…
GO:BP	regulation of signaling	GO:0023051	8.10666e-05	224	APLN,CCL1,TUB,HCRTR1,GPR17,SPRY4,SLC6A6,IL1RN,NTNG2,CCN2,CNKSR3,CXCL12,AJUBA,ACE2,AKAP12,GPR4,HSPA5,ONECUT2,NOS3,FABP5,FLT1,GAL,BMP6,IL7R,FFAR3,FGF12,TFRC,GADD45G,SMAD7,CCN1,CAVIN4,HYOU1,PTPRE,RAPGEF4,TRAF5,NLRP6,AGTR1,KCNG2,RGS16,ATP1B3,CPT1A,DISC1,PFKL,PTGDR2,VEGFA,LIMD1,FGFR3,ADRA2B,ATF3,SYT7,TAF4B,ITGA2,CNMD,GOT1,SLC2A1,SGK1,SMAD9,ECM1,PPARD,RRS1,GJA1,TMC8,RASGRF2,PSMA8,GIPR,KLF7,BCL2L1,DAAM2…
GO:BP	regulation of multicellular organismal process	GO:0051239	8.45398e-05	73	APLN,CCL1,PHOSPHO1,CACNA1G,CCN2,SMPD3,CXCL12,ZFP36,ACE2,AKAP12,ADAMTS1,GPR4,NR4A3,ETV4,NOS3,FABP5,FLT1,MAFF,AQP3,GAL,BMP6,IL7R,FFAR3,FGF12,TFRC,GADD45G,SMAD7,CCN1,BHLHE40,TRIB2,NLRP6,AGTR1,KCNG2,ATP1B3,DISC1,WDR77,SLC7A5,SOX8,PTGDR2,VEGFA,ADRA2B,SYT7,ITGA2,CNMD,PNP,SGK1,ECM1,PPARD,GJA1,CCND1,FABP4,KLF7,DAAM2,ADAMTS12,ID1,VCL,ETS1,KDR,TEAD4,P2RY2,LNPEP,CALR,ENG,POLR3G,UBASH3B,ATP1A1,SPRY1,PLXNA2,A…
GO:BP	regulation of hormone levels	GO:0010817	9.59845e-05	22	APLN,IL1RN,SMPD3,ACE2,GAL,BMP6,FFAR3,RAPGEF4,AGTR1,KCNG2,CPT1A,PFKL,SLC7A5,SOX8,RDH13,SYT7,SLC2A1,PPARD,GJA1,GIPR,KLF7,ENPEP
GO:BP	amide transport	GO:0042886	9.99818e-05	17	APLN,IL1RN,SMPD3,AQP3,GAL,FFAR3,RAPGEF4,KCNG2,CPT1A,PFKL,SYT7,SLC2A1,PPARD,GJA1,GIPR,KLF7,GLTPD2
GO:BP	nucleocytoplasmic transport	GO:0006913	0.000119052	46	RRS1,CALR,SRSF1,CABP1,STYX,CPSF6,LTV1,CAMK1,TARDBP,SRSF2,FLNA,UFM1,AHCYL1,XBP1,ATXN1,NOL6,UHMK1,NOP9,SNRPF,SNRPD1,NEDD4,SRSF5,NUP93,SMG5,CPSF1,STAT3,GEMIN5,SNRPB,ABCE1,MAVS,ZPR1,POLR2D,SEH1L,KPNA4,PPP1CC,NMD3,SRSF3,EIF4E,HIKESHI,SNRPD3,U2AF1,HNRNPA2B1,DHX9,KPNA6,KPNA1,RIOK2
GO:BP	peptide hormone secretion	GO:0030072	0.000119792	15	APLN,IL1RN,SMPD3,GAL,FFAR3,RAPGEF4,KCNG2,CPT1A,PFKL,SYT7,SLC2A1,PPARD,GJA1,GIPR,KLF7
GO:BP	homeostatic process	GO:0042592	0.000119806	56	APLN,CCL1,TUB,ACOX2,HCRTR1,CACNA1G,GPR17,CCN2,CXCL12,ZFP36,FABP3,GPR4,NR4A3,NOS3,FABP5,AQP3,BMP6,IL7R,ERO1A,FGF12,TFRC,GADD45G,TLCD2,SMAD7,AGTR1,ATP1B3,DISC1,VEGFA,SLC12A4,GOT1,SLC2A1,PPARD,HSP90B1,GJA1,TMC8,CYSLTR1,FABP4,GIPR,ATP13A3,KLF7,ID1,GAR1,VCL,ETS1,KDR,P2RY2,LNPEP,CALR,ABHD8,NEDD4L,UBASH3B,ATP1A1,MCL1,ADORA2A,GIT1,PLCL1
GO:BP	ncRNA processing	GO:0034470	0.000152286	53	RRS1,GAR1,RRP12,TSR1,WDR46,RPF2,BCDIN3D,NSUN6,NOP14,METTL1,WDR12,NAT10,PUS7,MAK16,INTS2,DIS3,RSL1D1,PWP2,RRP8,RRP15,NIFK,BOP1,NOL6,DPH3,IMP4,NOP9,WDR36,FTSJ1,INTS1,MRTO4,FTSJ3,CPSF1,FBL,DDX56,TRMT61B,BYSL,NHP2,STAT3,OSGEPL1,PDCD11,METTL3,WDR43,PA2G4,DUS3L,UTP4,EXOSC8,HNRNPA2B1,TRMT112,NOB1,UTP6,RTCB,URM1,RIOK2
GO:BP	muscle contraction	GO:0006936	0.000153581	27	CACNA1G,NMUR1,CCN2,STAC,ACE2,FGF12,SMAD7,ACTA2,ACTG2,ADRA2B,ITGA2,GJA1,VCL,TPM2,NEDD4L,ATP1A1,FGF13,SNTA1,SRF,ITGA1,TBX3,EHD3,KCNJ8,ENO1,TBX2,FLNA,PIK3C2A
GO:BP	nuclear transport	GO:0051169	0.000153979	46	RRS1,CALR,SRSF1,CABP1,STYX,CPSF6,LTV1,CAMK1,TARDBP,SRSF2,FLNA,UFM1,AHCYL1,XBP1,ATXN1,NOL6,UHMK1,NOP9,SNRPF,SNRPD1,NEDD4,SRSF5,NUP93,SMG5,CPSF1,STAT3,GEMIN5,SNRPB,ABCE1,MAVS,ZPR1,POLR2D,SEH1L,KPNA4,PPP1CC,NMD3,SRSF3,EIF4E,HIKESHI,SNRPD3,U2AF1,HNRNPA2B1,DHX9,KPNA6,KPNA1,RIOK2
GO:BP	peptide secretion	GO:0002790	0.000161982	15	APLN,IL1RN,SMPD3,GAL,FFAR3,RAPGEF4,KCNG2,CPT1A,PFKL,SYT7,SLC2A1,PPARD,GJA1,GIPR,KLF7
GO:BP	connective tissue development	GO:0061448	0.000180539	16	CCN2,SMPD3,GPR4,BMP6,SMAD7,CCN1,ACTA2,SOX8,FGFR3,CNMD,ECM1,PPARD,SERPINH1,KLF7,ADAMTS12,MSX1
GO:BP	mRNA processing	GO:0006397	0.000187966	60	CSDC2,WDR77,PABPC1L,SUGP2,SRSF1,CPSF6,MBNL3,LSM11,PDE12,TARDBP,SRSF2,AHCYL1,KHDC4,SCAF1,PRPF3,HNRNPA3,JMJD6,DDX5,PTBP1,GTF2H3,SNRPF,SNRPA,SNRPD1,SRSF5,RNGTT,CCNH,CPSF1,SNRNP40,CSTF3,PPIL1,RBMX,GEMIN5,SNRPB,PDCD11,METTL3,SCAF4,ZPR1,POLR2D,SYNCRIP,RPRD1A,ZNF473,RPRD1B,PAF1,CHERP,KHSRP,SRSF3,SNRPC,POLR2E,SNRPA1,SF3A2,SNRPD3,U2AF1,PRPF4B,HNRNPA2B1,ERN1,CDC73,DHX9,SF3B6,RAMAC,RBM42
GO:BP	cellular localization	GO:0051641	0.000223586	258	TUB,TUBA4A,STAC,ZFP36,TINAGL1,AJUBA,FABP3,DYNC1I1,NR4A3,HSPA5,FABP5,SAPCD2,ERO1A,SLC2A3,TFRC,SMAD7,SRL,HYOU1,RAPGEF4,MANF,ATP1B3,CPT1A,DISC1,PFKL,VEGFA,ARL8A,SYT7,SPTB,PNP,SLC18A2,ECM1,PPARD,HSP90B1,RRS1,GJA1,SLC51B,KLF7,BCL2L1,ID1,SLC9A3R2,VCL,TMEM50B,PABPC1L,ARL5A,FEZ1,MSX1,CALR,TIMM8A,NEDD4L,UBASH3B,TIMP3,ATP1A1,SPRY1,ADORA2A,GIT1,FGF13,NACAD,SAR1B,ANXA3,SYTL2,RILP,SRSF1,CABP1,PKDCC,MLEC,RPF2,…
GO:BP	regulation of hormone secretion	GO:0046883	0.000250875	15	APLN,GAL,BMP6,FFAR3,RAPGEF4,AGTR1,KCNG2,CPT1A,PFKL,SYT7,SLC2A1,PPARD,GJA1,GIPR,KLF7
GO:BP	rRNA processing	GO:0006364	0.000269758	36	RRS1,GAR1,RRP12,TSR1,WDR46,RPF2,NOP14,WDR12,NAT10,MAK16,DIS3,RSL1D1,PWP2,RRP8,RRP15,NIFK,BOP1,NOL6,IMP4,NOP9,WDR36,MRTO4,FTSJ3,FBL,DDX56,TRMT61B,BYSL,NHP2,PDCD11,WDR43,PA2G4,UTP4,EXOSC8,TRMT112,NOB1,UTP6
GO:BP	localization	GO:0051179	0.000286341	167	APLN,CCL1,TUB,ACOX2,CACNA1G,TUBA4A,SLC6A6,IL1RN,NTNG2,CBARP,TRPM3,SLC16A5,NMUR1,DNAH2,CCN2,SLC16A3,LOXL4,CNKSR3,SMPD3,STAC,CXCL12,ZFP36,TINAGL1,AJUBA,FABP3,ACE2,AKAP12,ADAMTS1,NDUFA4L2,DYNC1I1,FRMD5,NR4A3,HSPA5,ONECUT2,MASP1,NOS3,FABP5,FLT1,SAPCD2,AQP3,GAL,BMP6,FFAR3,ERO1A,FGF12,SLC2A3,TFRC,GJA9,SMAD7,SRL,CCN1,HYOU1,ABCC3,RAPGEF4,NLRP6,AGTR1,KCNG2,MANF,ATP1B3,CPT1A,MDGA1,DISC1,PFKL,SLC7A5,SOX8,VE…
GO:BP	regulation of secretion	GO:0051046	0.000309363	23	APLN,CACNA1G,CBARP,SMPD3,CXCL12,GAL,BMP6,FFAR3,RAPGEF4,NLRP6,AGTR1,KCNG2,CPT1A,PFKL,ADRA2B,SYT7,SLC10A1,SLC2A1,SGK1,PPARD,GJA1,GIPR,KLF7
GO:BP	rRNA metabolic process	GO:0016072	0.000335899	37	RRS1,GAR1,RRP12,TSR1,WDR46,RPF2,NOP14,WDR12,NAT10,MAK16,DIS3,RSL1D1,PWP2,RRP8,RRP15,NIFK,BOP1,NOL6,IMP4,NOP9,WDR36,MRTO4,FTSJ3,FBL,DDX56,TRMT61B,BYSL,NHP2,PDCD11,WDR43,PA2G4,UTP4,EXOSC8,TRMT112,NOB1,UTP6,TRIR
GO:BP	regulation of cell communication	GO:0010646	0.000362497	219	APLN,CCL1,TUB,HCRTR1,GPR17,SPRY4,SLC6A6,IL1RN,NTNG2,CCN2,CNKSR3,CXCL12,AJUBA,ACE2,AKAP12,GPR4,HSPA5,ONECUT2,NOS3,FABP5,FLT1,GAL,BMP6,IL7R,FFAR3,FGF12,TFRC,GADD45G,SMAD7,CCN1,CAVIN4,HYOU1,PTPRE,RAPGEF4,TRAF5,NLRP6,AGTR1,KCNG2,RGS16,CPT1A,DISC1,PFKL,PTGDR2,VEGFA,LIMD1,FGFR3,ADRA2B,ATF3,SYT7,TAF4B,ITGA2,CNMD,GOT1,SLC2A1,SGK1,SMAD9,ECM1,PPARD,RRS1,GJA1,TMC8,RASGRF2,PSMA8,GIPR,KLF7,BCL2L1,DAAM2,ADAMTS…
GO:BP	export from cell	GO:0140352	0.000433538	82	APLN,CACNA1G,TUBA4A,IL1RN,CBARP,CCN2,SMPD3,CXCL12,NR4A3,FABP5,GAL,BMP6,FFAR3,SLC2A3,RAPGEF4,AGTR1,KCNG2,MANF,ATP1B3,CPT1A,PFKL,VEGFA,ARL8A,ADRA2B,SYT7,PNP,SLC2A1,ECM1,PPARD,GJA1,SLC17A9,GIPR,KLF7,VCL,ENG,TIMP3,ATP1A1,ADORA2A,GIT1,ANXA3,SYTL2,PDIA4,MLEC,SDC4,ATP7B,ENDOD1,PRRT2,TMC6,TBX3,TARDBP,CRY1,ACTN1,CD68,FLNA,PHACTR2,FZD4,HGS,PIK3C2A,TMSB4X,STK10,ERP44,PGM2,PLAU,VWF,CD59,FRMD4A,SRCIN1,PTPN23,…
GO:BP	peptide transport	GO:0015833	0.000479115	15	APLN,IL1RN,SMPD3,GAL,FFAR3,RAPGEF4,KCNG2,CPT1A,PFKL,SYT7,SLC2A1,PPARD,GJA1,GIPR,KLF7
GO:BP	cellular response to stress	GO:0033554	0.000538405	168	UPP1,CCN2,SMPD3,STAC,CXCL12,ZFP36,AJUBA,NR4A3,HSPA5,NOS3,AQP3,ERO1A,FGF12,GADD45G,HYOU1,TRAF5,MANF,VEGFA,LIMD1,ATF3,EGLN3,SLC2A1,PPARD,HSP90B1,CCND1,RASGRF2,PSMA8,AK4,BCL2L1,HSPH1,ETS1,MSX1,CALR,UGGT1,MCL1,SPRED3,ASS1,PDIA4,HIGD1A,EEF1E1,PPP1R15A,SRF,GCH1,GADD45B,SPRED1,ERLIN1,FICD,MAP2K1,MYBBP1A,GOSR2,SDF2L1,BAG5,STK26,TBX3,DNAJB11,TARDBP,CRY1,PDIA6,ENO1,TBX2,VASN,RSL1D1,FLNA,HSPB1,PLK3,LPCAT3,U…
GO:BP	response to organic substance	GO:0010033	0.000558563	80	APLN,CCL1,TUB,GPR17,SPRY4,IL1RN,CCN2,SMPD3,CXCL12,ZFP36,FABP3,WFDC1,AKAP12,NR4A3,HSPA5,ONECUT2,NOS3,FLT1,AQP3,GAL,BMP6,IL7R,FFAR3,ERO1A,FGF12,TFRC,SMAD7,CCN1,HYOU1,PTPRE,TRAF5,AGTR1,MANF,CYSLTR2,CPT1A,PFKL,VEGFA,FGFR3,ATF3,ITGA2,CNMD,SLC10A1,LDHA,GOT1,SLC18A2,AMHR2,SLC2A1,SMAD9,ECM1,PPARD,HSP90B1,GJA1,CCND1,SERPINH1,FABP4,PSMA8,GIPR,KLF7,TIMP4,BCL2L1,HSPH1,ADAMTS12,ID1,ZNF366,ETS1,KDR,P2RY2,FEZ1,…
GO:BP	protein folding in endoplasmic reticulum	GO:0034975	0.000616507	7	HSPA5,ERO1A,HSP90B1,CALR,PDIA3,CANX,DNAJC3
GO:BP	cellular response to chemical stimulus	GO:0070887	0.000657499	210	APLN,CCL1,GPR17,SPRY4,IL1RN,CCN2,SMPD3,CXCL12,ZFP36,AJUBA,AKAP12,NR4A3,HSPA5,ONECUT2,NOS3,FLT1,AQP3,BMP6,IL7R,FFAR3,ERO1A,FGF12,TFRC,SMAD7,CCN1,HYOU1,PTPRE,TRAF5,AGTR1,CYSLTR2,CPT1A,VEGFA,LIMD1,FGFR3,ATF3,SYT7,EGLN3,ITGA2,CNMD,SLC10A1,GOT1,AMHR2,SLC2A1,SMAD9,ECM1,PPARD,HSP90B1,GJA1,CCND1,FABP4,PSMA8,AK4,KLF7,BCL2L1,ADAMTS12,ID1,ZNF366,ETS1,KDR,P2RY2,FEZ1,MSX1,CALR,UGGT1,ENG,ATP1A1,SPRY1,MCL1,GIT1…
GO:BP	response to decreased oxygen levels	GO:0036293	0.000684105	39	CCN2,CXCL12,AJUBA,AQP3,ERO1A,HYOU1,VEGFA,LIMD1,EGLN3,ITGA2,LDHA,SLC2A1,PPARD,HSP90B1,PSMA8,AK4,ETS1,ENG,HIGD1A,SRF,ENO1,CAPN2,VASN,PLK3,PLAU,ADAM15,SLC29A1,SLC9A1,TWIST1,CBL,PGK1,EGLN1,PSMD14,ATF4,PSMA5,PSMD11,PSMD12,PSMD3,PSMC4
GO:BP	IRE1-mediated unfolded protein response	GO:0036498	0.000720421	16	HSPA5,HYOU1,FICD,GOSR2,DNAJB11,PDIA6,TMEM33,EDEM1,XBP1,SRPRB,DAB2IP,GSK3A,BAX,DNAJC3,ERN1,TLN1
GO:BP	chemical homeostasis	GO:0048878	0.000870471	39	CCL1,ACOX2,HCRTR1,CACNA1G,GPR17,CXCL12,FABP3,GPR4,FABP5,AQP3,BMP6,ERO1A,FGF12,TFRC,TLCD2,SMAD7,AGTR1,ATP1B3,DISC1,VEGFA,SLC12A4,GOT1,PPARD,HSP90B1,GJA1,TMC8,CYSLTR1,FABP4,GIPR,ATP13A3,KLF7,KDR,P2RY2,CALR,ABHD8,NEDD4L,UBASH3B,ATP1A1,ADORA2A
GO:BP	signal release	GO:0023061	0.00107434	19	APLN,IL1RN,SMPD3,CXCL12,GAL,BMP6,FFAR3,RAPGEF4,AGTR1,KCNG2,CPT1A,PFKL,ADRA2B,SYT7,SLC2A1,PPARD,GJA1,GIPR,KLF7
GO:BP	angiogenesis	GO:0001525	0.00109555	45	APLN,CCN2,ADAMTS1,GPR4,COL8A2,NOS3,FLT1,CCN1,AGTR1,VEGFA,AMOTL2,CNMD,ECM1,ENPEP,ID1,ETS1,KDR,ENG,ANXA3,CCDC134,NUS1,SRF,SPRED1,COL4A2,FLNA,HSPB1,COL4A1,CLIC4,HGS,PIK3C2A,SHB,ARHGAP24,ADAM15,PDGFRB,XBP1,NFATC4,JMJD6,DAB2IP,EPN2,HDAC7,TWIST1,ITGB1,PGK1,EGLN1,MYH9
GO:BP	regulation of cell population proliferation	GO:0042127	0.00110597	38	APLN,CCN2,SMPD3,CXCL12,ZFP36,RARRES1,FABP3,ACE2,WFDC1,ADAMTS1,NR4A3,NOS3,FLT1,SAPCD2,GAL,BMP6,IL7R,TFRC,SMAD7,CCN1,TRAF5,AGTR1,DISC1,WDR77,SOX8,PTGDR2,VEGFA,FGFR3,ATF3,EGLN3,ITGA2,CNMD,PNP,SGK1,ECM1,PPARD,GJA1,CCND1
GO:BP	secretion by cell	GO:0032940	0.00111134	78	APLN,CACNA1G,TUBA4A,IL1RN,CBARP,CCN2,SMPD3,CXCL12,NR4A3,FABP5,GAL,BMP6,FFAR3,SLC2A3,RAPGEF4,AGTR1,KCNG2,MANF,CPT1A,PFKL,VEGFA,ARL8A,ADRA2B,SYT7,PNP,SLC2A1,ECM1,PPARD,GJA1,SLC17A9,GIPR,KLF7,VCL,ENG,TIMP3,ADORA2A,GIT1,ANXA3,SYTL2,PDIA4,MLEC,SDC4,ENDOD1,PRRT2,TMC6,TBX3,TARDBP,CRY1,ACTN1,CD68,FLNA,PHACTR2,FZD4,HGS,PIK3C2A,TMSB4X,STK10,ERP44,PGM2,PLAU,VWF,CD59,FRMD4A,SRCIN1,PTPN23,ACTN4,TUBB4B,PGAM1,A…
GO:BP	regulation of cell migration	GO:0030334	0.00111808	57	CCL1,NTNG2,SMPD3,CXCL12,AJUBA,AKAP12,ADAMTS1,FRMD5,NR4A3,HSPA5,ONECUT2,NOS3,FLT1,SMAD7,CCN1,VEGFA,AMOTL2,ITGA2,SGK1,ECM1,PPARD,GJA1,VCL,ETS1,KDR,CALR,ENG,PLXNA2,ANXA3,SDC4,NUS1,SPATA13,SRF,SPRED1,PLXNA1,PODXL,STK26,MYO1C,AKIRIN1,DNAJA4,PTPRG,FLNA,HSPB1,CLIC4,PIK3C2A,TMSB4X,STK10,PLAU,DLC1,ADAM15,PDGFRB,XBP1,SRCIN1,PTPN23,ACTN4,PPM1F,DAB2IP
GO:BP	blood vessel development	GO:0001568	0.00150135	53	APLN,CCN2,ADAMTS1,GPR4,COL8A2,NOS3,FLT1,SMAD7,CCN1,ACTA2,AGTR1,VEGFA,AMOTL2,CNMD,ECM1,ENPEP,ID1,ETS1,KDR,ENG,ANXA3,CCDC134,NUS1,SRF,SPRED1,MAP2K1,TBX3,TIPARP,COL4A2,TBX2,FLNA,HSPB1,COL4A1,FZD4,CLIC4,HGS,PIK3C2A,SHB,ARHGAP24,ADAM15,PDGFRB,XBP1,SMAD6,NFATC4,JMJD6,DAB2IP,EPN2,HDAC7,TWIST1,ITGB1,PGK1,EGLN1,MYH9
GO:BP	regulation of DNA-templated transcription in response to stress	GO:0043620	0.00156031	20	HSPA5,VEGFA,LIMD1,ATF3,EGLN3,PSMA8,HIGD1A,XBP1,RPS6KA3,EGLN1,NEDD4,PSMD14,ATF4,PSMA5,PSMD11,PSMD12,PSMD3,PSMC4,ATF6,PSME3
GO:BP	response to oxygen levels	GO:0070482	0.00157666	40	CCN2,CXCL12,AJUBA,AQP3,ERO1A,HYOU1,VEGFA,LIMD1,EGLN3,ITGA2,LDHA,SLC2A1,PPARD,HSP90B1,PSMA8,AK4,ETS1,ENG,HIGD1A,SRF,ENO1,CAPN2,VASN,PLK3,PLAU,ADAM15,SLC29A1,PDGFRB,SLC9A1,TWIST1,CBL,PGK1,EGLN1,PSMD14,ATF4,PSMA5,PSMD11,PSMD12,PSMD3,PSMC4
GO:BP	regulation of cellular component movement	GO:0051270	0.00167133	62	CCL1,NTNG2,SMPD3,CXCL12,AJUBA,AKAP12,ADAMTS1,FRMD5,NR4A3,HSPA5,ONECUT2,NOS3,FLT1,SMAD7,CCN1,VEGFA,AMOTL2,ITGA2,SGK1,ECM1,PPARD,GJA1,VCL,ETS1,KDR,FEZ1,CALR,ENG,ATP1A1,PLXNA2,FGF13,ANXA3,SDC4,NUS1,SPATA13,SRF,SPRED1,PLXNA1,MAP2,PODXL,STK26,ACTN1,MYO1C,AKIRIN1,DNAJA4,PTPRG,FLNA,HSPB1,CLIC4,PIK3C2A,TMSB4X,STK10,PLAU,DLC1,ADAM15,PDGFRB,XBP1,SRCIN1,PTPN23,ACTN4,PPM1F,DAB2IP
GO:BP	blood vessel morphogenesis	GO:0048514	0.00172389	49	APLN,CCN2,ADAMTS1,GPR4,COL8A2,NOS3,FLT1,SMAD7,CCN1,AGTR1,VEGFA,AMOTL2,CNMD,ECM1,ENPEP,ID1,ETS1,KDR,ENG,ANXA3,CCDC134,NUS1,SRF,SPRED1,TIPARP,COL4A2,TBX2,FLNA,HSPB1,COL4A1,FZD4,CLIC4,HGS,PIK3C2A,SHB,ARHGAP24,ADAM15,PDGFRB,XBP1,NFATC4,JMJD6,DAB2IP,EPN2,HDAC7,TWIST1,ITGB1,PGK1,EGLN1,MYH9
GO:BP	macromolecule localization	GO:0033036	0.00199327	230	TUB,ACOX2,IL1RN,SMPD3,STAC,ZFP36,AJUBA,FABP3,HSPA5,FABP5,SAPCD2,GAL,BMP6,TFRC,SMAD7,ABCC3,RAPGEF4,AGTR1,KCNG2,ATP1B3,CPT1A,DISC1,PFKL,VEGFA,ARL8A,SYT7,ITGA2,SLC10A1,SLC2A1,PPARD,HSP90B1,RRS1,GJA1,FABP4,SLC51B,GIPR,KLF7,GLTPD2,BCL2L1,ID1,SLC9A3R2,VCL,ARL5A,MSX1,CALR,TIMM8A,NEDD4L,MCL1,ADORA2A,FGF13,NACAD,SAR1B,SYTL2,RILP,SRSF1,PDIA4,CABP1,PKDCC,RPF2,SYNGAP1,STYX,PPP1R15A,NUS1,CPSF6,TMEM88,CAMK1,MA…
GO:BP	ribosomal large subunit biogenesis	GO:0042273	0.00202824	14	RRS1,NIP7,RPF2,WDR12,MAK16,RSL1D1,RRP15,NOP16,NIFK,BOP1,MRTO4,MRPL20,FTSJ3,NHP2
GO:BP	cellular response to decreased oxygen levels	GO:0036294	0.00203107	27	AJUBA,AQP3,ERO1A,HYOU1,VEGFA,LIMD1,EGLN3,PPARD,PSMA8,AK4,HIGD1A,ENO1,VASN,PLK3,SLC29A1,SLC9A1,TWIST1,CBL,PGK1,EGLN1,PSMD14,ATF4,PSMA5,PSMD11,PSMD12,PSMD3,PSMC4
GO:BP	negative regulation of signal transduction	GO:0009968	0.00208378	101	APLN,SPRY4,IL1RN,CNKSR3,CXCL12,AJUBA,HSPA5,ONECUT2,NOS3,SMAD7,HYOU1,PTPRE,NLRP6,RGS16,LIMD1,ATF3,CNMD,SMAD9,ECM1,PSMA8,GIPR,BCL2L1,ADAMTS12,ZNF366,CALR,ENG,UBASH3B,TIMP3,SPRY1,MCL1,SPRED3,SYNGAP1,PPP1R15A,ITGA1,SPRED1,TMEM88,MDFI,BAG5,CRY1,RGS5,TMEM64,RNF149,ENO1,LITAF,SEC14L1,VASN,HSPB1,FZD4,HGS,TMSB4X,RNF152,NCOR2,GLIS2,ARHGAP24,DLC1,TNFAIP1,WWC2,XBP1,SMAD6,NFATC4,PAWR,DAB2IP,HIPK3,CRYBA1,USP10…
GO:BP	response to fluid shear stress	GO:0034405	0.00223397	9	NOS3,SMAD7,GJA1,ETS1,ASS1,PDGFRB,XBP1,SMAD6,CA2
GO:BP	positive regulation of cell population proliferation	GO:0008284	0.00232629	31	APLN,CCN2,SMPD3,CXCL12,ADAMTS1,NR4A3,FLT1,SAPCD2,BMP6,IL7R,TFRC,CCN1,TRAF5,AGTR1,DISC1,WDR77,SOX8,VEGFA,FGFR3,ATF3,ITGA2,PNP,ECM1,PPARD,GJA1,CCND1,BCL2L1,ID1,ETS1,KDR,CALR
GO:BP	system development	GO:0048731	0.00237941	112	APLN,TUB,PHOSPHO1,CACNA1G,GPR17,SPRY4,NTNG2,CCN2,NTN3,SMPD3,CXCL12,ZFP36,MTHFD1L,ADAMTS1,GPR4,NR4A3,HSPA5,ONECUT2,ETV4,COL8A2,NOS3,FLT1,SAPCD2,ADAMTS4,MAFF,AQP3,GAL,BMP6,IL7R,SPATA5,ERO1A,FGF12,TFRC,SHROOM4,SMAD7,RAPH1,CCN1,CAVIN4,ACTA2,BHLHE40,AGTR1,MANF,PCDH18,CPT1A,MDGA1,DISC1,WDR77,KIF26B,ACTG2,SOX8,RDH13,VEGFA,FGFR3,ADRA2B,ATF3,AMOTL2,ITGA2,CNMD,SPTB,LDHA,PNP,SDK2,SLC2A1,SGK1,ECM1,PPARD,GJA1…
GO:BP	vasculature development	GO:0001944	0.00266409	54	APLN,CCN2,ADAMTS1,GPR4,COL8A2,NOS3,FLT1,SMAD7,CCN1,ACTA2,AGTR1,VEGFA,AMOTL2,CNMD,ECM1,ENPEP,ID1,ETS1,KDR,ENG,ANXA3,CCDC134,NUS1,SRF,SPRED1,MAP2K1,TBX3,TIPARP,COL4A2,TBX2,FLNA,HSPB1,COL4A1,FZD4,CLIC4,HGS,PIK3C2A,SHB,ARHGAP24,ADAM15,PDGFRB,XBP1,SMAD6,NFATC4,JMJD6,DAB2IP,EPN2,HDAC7,TMEM204,TWIST1,ITGB1,PGK1,EGLN1,MYH9
GO:BP	muscle system process	GO:0003012	0.00267277	29	CACNA1G,NMUR1,CCN2,STAC,ACE2,NR4A3,NOS3,FGF12,SMAD7,ACTA2,ACTG2,ADRA2B,ITGA2,GJA1,VCL,TPM2,NEDD4L,ATP1A1,FGF13,SNTA1,SRF,ITGA1,TBX3,EHD3,KCNJ8,ENO1,TBX2,FLNA,PIK3C2A
GO:BP	regulation of sodium ion transport	GO:0002028	0.00275595	15	CNKSR3,FGF12,ATP1B3,NEDD4L,ATP1A1,FGF13,HECW2,SNTA1,AHCYL1,ACTN4,SLC9A1,STOM,NEDD4,WNK1,FXYD5
GO:BP	anatomical structure development	GO:0048856	0.00281606	129	APLN,TUB,PHOSPHO1,CACNA1G,GPR17,SPRY4,IL1RN,NTNG2,CCN2,CCDC151,NTN3,SMPD3,CXCL12,PIWIL3,ZFP36,MTHFD1L,AJUBA,ADAMTS1,GPR4,NR4A3,HSPA5,ONECUT2,ETV4,COL8A2,NOS3,FABP5,FLT1,SAPCD2,ADAMTS4,MAFF,AQP3,GAL,BMP6,IL7R,SPATA5,ERO1A,FGF12,TFRC,GADD45G,SHROOM4,SMAD7,RAPH1,CCN1,CAVIN4,ACTA2,BHLHE40,AGTR1,MANF,PCDH18,CPT1A,MDGA1,DISC1,WDR77,EMP1,KIF26B,ACTG2,SOX8,RDH13,VEGFA,CPM,LIMD1,FGFR3,ADRA2B,ATF3,AMOTL2,T…
GO:BP	regulation of transcription from RNA polymerase II promoter in response to stress	GO:0043618	0.00290866	19	HSPA5,VEGFA,LIMD1,ATF3,EGLN3,PSMA8,HIGD1A,XBP1,EGLN1,NEDD4,PSMD14,ATF4,PSMA5,PSMD11,PSMD12,PSMD3,PSMC4,ATF6,PSME3
GO:BP	regulation of transport	GO:0051049	0.00298455	73	APLN,TUB,CACNA1G,CBARP,CNKSR3,SMPD3,STAC,CXCL12,FABP3,ACE2,NR4A3,FABP5,GAL,BMP6,FFAR3,FGF12,RAPGEF4,NLRP6,AGTR1,KCNG2,ATP1B3,CPT1A,PFKL,VEGFA,ADRA2B,SYT7,ITGA2,SLC10A1,SLC2A1,SGK1,PPARD,GJA1,RASGRF2,SLC51B,GIPR,KLF7,P2RY2,FEZ1,CALR,NEDD4L,UBASH3B,KCNAB3,ATP1A1,ADORA2A,GIT1,FGF13,SAR1B,HECW2,CABP1,PKDCC,SDC4,SNTA1,PRRT2,NUS1,KCNK4,CLIC1,CPSF6,CAMK1,MAP2,MAP2K1,TARDBP,CRY1,EHD3,KCNJ8,MYO1C,FLNA,PLK…
GO:BP	ion homeostasis	GO:0050801	0.00304736	29	CCL1,HCRTR1,CACNA1G,GPR17,CXCL12,GPR4,BMP6,ERO1A,FGF12,TFRC,SMAD7,AGTR1,ATP1B3,DISC1,SLC12A4,GOT1,HSP90B1,GJA1,TMC8,CYSLTR1,GIPR,ATP13A3,KDR,P2RY2,CALR,NEDD4L,UBASH3B,ATP1A1,ADORA2A
GO:BP	maturation of LSU-rRNA	GO:0000470	0.00305828	9	RPF2,WDR12,MAK16,RSL1D1,RRP15,NIFK,BOP1,FTSJ3,NHP2
GO:BP	regulation of signal transduction	GO:0009966	0.00306703	200	APLN,CCL1,TUB,HCRTR1,GPR17,SPRY4,IL1RN,CCN2,CNKSR3,CXCL12,AJUBA,ACE2,AKAP12,GPR4,HSPA5,ONECUT2,NOS3,FABP5,FLT1,BMP6,IL7R,FFAR3,TFRC,GADD45G,SMAD7,CCN1,CAVIN4,HYOU1,PTPRE,TRAF5,NLRP6,RGS16,DISC1,PTGDR2,VEGFA,LIMD1,FGFR3,ADRA2B,ATF3,TAF4B,CNMD,GOT1,SGK1,SMAD9,ECM1,PPARD,RRS1,GJA1,TMC8,RASGRF2,PSMA8,GIPR,BCL2L1,DAAM2,ADAMTS12,ZNF366,ARHGEF9,KDR,MSX1,CALR,ENG,UBASH3B,TIMP3,SPRY1,MCL1,ADORA2A,GIT1,SPR…
GO:BP	positive regulation of lipid metabolic process	GO:0045834	0.00312648	10	SMPD3,FABP3,NR4A3,FLT1,BMP6,CCN1,AGTR1,CPT1A,FGFR3,PPARD
GO:BP	regulation of blood pressure	GO:0008217	0.00315562	13	APLN,ACE2,NOS3,FFAR3,ACTA2,AGTR1,ADRA2B,SGK1,GJA1,ENPEP,LNPEP,ENG,ATP1A1
GO:BP	transmembrane transport	GO:0055085	0.00320065	37	CACNA1G,SLC6A6,CBARP,TRPM3,SLC16A5,SLC16A3,STAC,ACE2,NDUFA4L2,NR4A3,HSPA5,FABP5,AQP3,GAL,ERO1A,FGF12,SLC2A3,GJA9,ABCC3,KCNG2,ATP1B3,CPT1A,SLC7A5,SLC12A4,SLC35B4,SLC10A1,SLC18A2,SLC2A1,SGK1,PPARD,GJA1,TMC8,RASGRF2,PSMA8,SLC51B,SLC17A9,ATP13A3
GO:BP	negative regulation of cell communication	GO:0010648	0.00338905	106	APLN,SPRY4,IL1RN,CNKSR3,CXCL12,AJUBA,HSPA5,ONECUT2,NOS3,SMAD7,HYOU1,PTPRE,NLRP6,RGS16,PFKL,LIMD1,ATF3,CNMD,SMAD9,ECM1,GJA1,PSMA8,GIPR,KLF7,BCL2L1,ADAMTS12,ZNF366,CALR,ENG,UBASH3B,TIMP3,SPRY1,MCL1,GRIK3,SPRED3,SYNGAP1,PPP1R15A,SRF,ITGA1,SPRED1,TMEM88,MDFI,BAG5,CRY1,RGS5,TMEM64,RNF149,ENO1,LITAF,SEC14L1,VASN,HSPB1,FZD4,HGS,TMSB4X,RNF152,NCOR2,GLIS2,ARHGAP24,DLC1,TNFAIP1,WWC2,XBP1,SMAD6,NFATC4,PAWR,…
GO:BP	vascular transport	GO:0010232	0.00346821	8	SLC6A6,FABP5,SLC2A3,TFRC,ABCC3,SLC7A5,SLC2A1,GJA1
GO:BP	regulation of cellular response to stress	GO:0080135	0.00350828	69	CCN2,CXCL12,AJUBA,NR4A3,HSPA5,GADD45G,HYOU1,TRAF5,MANF,VEGFA,ATF3,BCL2L1,HSPH1,MSX1,MCL1,SPRED3,EEF1E1,PPP1R15A,GCH1,GADD45B,SPRED1,FICD,MAP2K1,BAG5,STK26,CRY1,ENO1,RSL1D1,FLNA,HSPB1,LPCAT3,TMEM33,XBP1,DDX5,PAWR,DAB2IP,HIPK3,CHORDC1,TWIST1,ABI3,UBE2V2,HSP90AA1,SEMA4C,WRAP53,SNAI2,CERS2,NUP93,PTGES3,PRDX1,PRMT1,YBX3,UBE2N,ATF4,BAX,ATF6,RNFT1,TAF9,SEH1L,STK24,HRAS,HIKESHI,WRNIP1,TIGAR,EIF4G1,DNAJC3…
GO:BP	negative regulation of signaling	GO:0023057	0.00371889	106	APLN,SPRY4,IL1RN,CNKSR3,CXCL12,AJUBA,HSPA5,ONECUT2,NOS3,SMAD7,HYOU1,PTPRE,NLRP6,RGS16,PFKL,LIMD1,ATF3,CNMD,SMAD9,ECM1,GJA1,PSMA8,GIPR,KLF7,BCL2L1,ADAMTS12,ZNF366,CALR,ENG,UBASH3B,TIMP3,SPRY1,MCL1,GRIK3,SPRED3,SYNGAP1,PPP1R15A,SRF,ITGA1,SPRED1,TMEM88,MDFI,BAG5,CRY1,RGS5,TMEM64,RNF149,ENO1,LITAF,SEC14L1,VASN,HSPB1,FZD4,HGS,TMSB4X,RNF152,NCOR2,GLIS2,ARHGAP24,DLC1,TNFAIP1,WWC2,XBP1,SMAD6,NFATC4,PAWR,…
GO:BP	establishment of localization	GO:0051234	0.00373245	321	APLN,TUB,CACNA1G,TUBA4A,SLC6A6,IL1RN,CBARP,TRPM3,SLC16A5,NMUR1,CCN2,SLC16A3,LOXL4,CNKSR3,SMPD3,STAC,CXCL12,ZFP36,TINAGL1,FABP3,ACE2,NDUFA4L2,DYNC1I1,NR4A3,HSPA5,MASP1,FABP5,SAPCD2,AQP3,GAL,BMP6,FFAR3,ERO1A,FGF12,SLC2A3,TFRC,GJA9,SRL,HYOU1,ABCC3,RAPGEF4,NLRP6,AGTR1,KCNG2,MANF,ATP1B3,CPT1A,PFKL,SLC7A5,VEGFA,ARL8A,ADRA2B,SYT7,SLC12A4,ITGA2,SPTB,SLC35B4,SLC10A1,PNP,SLC18A2,SLC2A1,SGK1,ECM1,PPARD,HSP9…
GO:BP	tube morphogenesis	GO:0035239	0.00390953	59	APLN,CCN2,MTHFD1L,ADAMTS1,GPR4,COL8A2,NOS3,FLT1,SMAD7,CCN1,AGTR1,KIF26B,SOX8,VEGFA,AMOTL2,CNMD,ECM1,MICAL2,ENPEP,ADAMTS12,ID1,ETS1,KDR,ENG,SPRY1,ANXA3,CCDC134,SDC4,NUS1,SRF,SPRED1,PODXL,TBX3,TIPARP,COL4A2,TBX2,FLNA,HSPB1,COL4A1,FZD4,CLIC4,HGS,PIK3C2A,SHB,ARHGAP24,DLC1,ADAM15,PDGFRB,XBP1,NFATC4,JMJD6,DAB2IP,EPN2,HDAC7,TWIST1,ITGB1,PGK1,EGLN1,MYH9
GO:BP	anatomical structure formation involved in morphogenesis	GO:0048646	0.00396102	70	APLN,CCN2,SMPD3,MTHFD1L,ADAMTS1,GPR4,COL8A2,NOS3,FLT1,CCN1,AGTR1,KIF26B,SOX8,RDH13,VEGFA,AMOTL2,ITGA2,CNMD,SDK2,ECM1,GJA1,ENPEP,ID1,ETS1,KDR,TEAD4,MSX1,ENG,SPRY1,PLXNA2,PMP22,ANXA3,CCDC134,SDC4,NUS1,SRF,SPRED1,CAMK1,PODXL,MAP2K1,TBX3,ACTN1,CAPN2,COL4A2,TBX2,CSRP1,FLNA,HSPB1,COL4A1,CLIC4,HGS,PIK3C2A,LRP8,SHB,ARHGAP24,DLC1,ADAM15,PDGFRB,XBP1,NFATC4,JMJD6,ADAMTS15,DAB2IP,EPN2,HDAC7,TWIST1,ITGB1,PGK1…
GO:BP	nitrogen compound transport	GO:0071705	0.00403905	165	APLN,SLC6A6,IL1RN,SMPD3,CXCL12,ZFP36,ACE2,HSPA5,AQP3,GAL,BMP6,FFAR3,TFRC,RAPGEF4,KCNG2,CPT1A,PFKL,SLC7A5,ARL8A,ADRA2B,SYT7,SLC12A4,SLC35B4,SLC18A2,SLC2A1,PPARD,HSP90B1,GJA1,SLC51B,SLC17A9,GIPR,KLF7,GLTPD2,ARL5A,CALR,TIMM8A,MCL1,ADORA2A,NACAD,SAR1B,SLC35A3,SYTL2,RILP,SRSF1,PDIA4,CABP1,PKDCC,STYX,CPSF6,CAMK1,GOSR2,TARDBP,SRSF2,SLC33A1,TIMM9,EHD3,MYO1C,SEC14L1,SPCS3,GRPEL1,FLNA,HSPB1,SLC38A1,PLK3,UF…
GO:BP	regulation of catabolic process	GO:0009894	0.00427856	96	ZFP36,SMAD7,TRIB2,TRAF5,NLRP6,CSDC2,CPT1A,DISC1,GJA1,PSMA8,TIMP4,BCL2L1,KDR,FEZ1,NEDD4L,TIMP3,MCL1,GIT1,HECW2,RILP,STYX,NT5C3B,PDE12,BAG5,TARDBP,TIPARP,PPP1R3D,DIS3,ZFAND2A,FLNA,HSPB1,PLK3,HGS,PIK3C2A,RNF152,XBP1,DAB2IP,PGAM1,SOGA1,USP10,TWIST1,ITGB1,UBE2V2,DET1,PIM2,HSP90AA1,NEDD4,MAP3K7,HSPBP1,NUP93,SOCS4,PSMD14,YBX3,JMJD8,PSMA5,TAB3,PSMD11,PSMD12,PSMD3,GSK3A,PLK1,BAX,STAT3,PSMC4,RNF14,USP5,MET…
GO:BP	insulin secretion	GO:0030073	0.00431131	12	IL1RN,GAL,RAPGEF4,KCNG2,CPT1A,PFKL,SYT7,SLC2A1,PPARD,GJA1,GIPR,KLF7
GO:BP	skeletal system development	GO:0001501	0.00435863	27	PHOSPHO1,CCN2,SMPD3,MTHFD1L,ADAMTS4,BMP6,SMAD7,CCN1,FGFR3,CNMD,ECM1,GJA1,SERPINH1,XYLT1,ADAMTS12,TEAD4,MSX1,ENG,HAPLN3,PKDCC,ALPL,SRF,MMP16,CHSY1,MDFI,TBX3,TIPARP
GO:BP	regulation of secretion by cell	GO:1903530	0.004384	20	APLN,CACNA1G,CBARP,SMPD3,CXCL12,GAL,BMP6,FFAR3,RAPGEF4,AGTR1,KCNG2,CPT1A,PFKL,ADRA2B,SYT7,SLC2A1,PPARD,GJA1,GIPR,KLF7
GO:BP	establishment of localization in cell	GO:0051649	0.00441196	193	TUB,TUBA4A,TINAGL1,FABP3,DYNC1I1,NR4A3,HSPA5,FABP5,SAPCD2,ERO1A,SLC2A3,SRL,HYOU1,RAPGEF4,MANF,CPT1A,PFKL,VEGFA,ARL8A,SYT7,SPTB,PNP,SLC18A2,ECM1,PPARD,HSP90B1,RRS1,GJA1,SLC51B,KLF7,VCL,TMEM50B,ARL5A,FEZ1,CALR,TIMM8A,UBASH3B,TIMP3,ATP1A1,SPRY1,ADORA2A,GIT1,NACAD,SAR1B,ANXA3,SYTL2,RILP,SRSF1,CABP1,MLEC,SNTA1,STYX,ENDOD1,PRRT2,TMC6,NUS1,CPSF6,ATP5MC1,LTV1,CAMK1,MAP2,MAP2K1,GOSR2,TARDBP,SRSF2,TIMM9,EH…
GO:BP	response to growth factor	GO:0070848	0.00446365	55	APLN,SPRY4,CCN2,SMPD3,ZFP36,HSPA5,ONECUT2,FLT1,BMP6,FGF12,SMAD7,CCN1,VEGFA,FGFR3,CNMD,GOT1,AMHR2,SMAD9,ADAMTS12,ID1,KDR,FEZ1,MSX1,ENG,SPRY1,SPRED3,ANXA3,NUS1,SPRED1,SLC33A1,MYO1C,COL4A2,VASN,HSPB1,FZD4,HGS,IER2,LRP8,PDGFRB,XBP1,SMAD6,DDX5,DAB2IP,PTBP1,EPN2,TMEM204,TWIST1,CBL,GCLM,NEDD4,MAP3K7,SNAI2,CLEC3B,KIF16B,HEYL
GO:BP	cellular response to organic substance	GO:0071310	0.00449103	188	APLN,CCL1,GPR17,SPRY4,IL1RN,CCN2,SMPD3,CXCL12,ZFP36,AKAP12,NR4A3,HSPA5,ONECUT2,FLT1,BMP6,IL7R,FFAR3,ERO1A,FGF12,TFRC,SMAD7,CCN1,HYOU1,PTPRE,TRAF5,AGTR1,CYSLTR2,CPT1A,VEGFA,FGFR3,ATF3,ITGA2,CNMD,GOT1,AMHR2,SMAD9,ECM1,PPARD,HSP90B1,GJA1,CCND1,FABP4,PSMA8,KLF7,BCL2L1,ADAMTS12,ID1,ZNF366,KDR,P2RY2,FEZ1,MSX1,CALR,UGGT1,ENG,ATP1A1,SPRY1,MCL1,GIT1,SPRED3,ASS1,ALPL,PIGA,PPP1R15A,NUS1,SRF,KCNK4,SPRED1,FIC…
GO:BP	wound healing	GO:0042060	0.00499759	35	AKAP1,AJUBA,WFDC1,GPR4,NOS3,MAFF,CCN1,NLRP6,VEGFA,ADRA2B,SYT7,ITGA2,PPARD,GJA1,VCL,ETS1,KDR,ENG,UBASH3B,ADORA2A,SDC4,THBD,SRF,CLIC1,EHD3,CSRP1,FLNA,HSPB1,PLAU,VWF,ARHGAP24,DYSF,PDGFRB,CD59,XBP1
GO:BP	regulation of cellular catabolic process	GO:0031329	0.00501198	84	ZFP36,SMAD7,TRIB2,TRAF5,NLRP6,CSDC2,CPT1A,DISC1,PSMA8,TIMP4,BCL2L1,KDR,FEZ1,TIMP3,MCL1,STYX,NT5C3B,PDE12,BAG5,TARDBP,PPP1R3D,DIS3,ZFAND2A,HSPB1,PLK3,PIK3C2A,RNF152,XBP1,DAB2IP,PGAM1,SOGA1,USP10,TWIST1,UBE2V2,DET1,PIM2,HSP90AA1,NEDD4,MAP3K7,HSPBP1,SOCS4,PSMD14,YBX3,PSMA5,TAB3,PSMD11,PSMD12,PSMD3,GSK3A,PLK1,BAX,STAT3,PSMC4,RNF14,USP5,METTL3,ATF6,RC3H2,SCOC,POLR2D,GLMN,ATP2B4,RNFT1,TAF9,SNX33,CNOT9,…
GO:BP	response to hypoxia	GO:0001666	0.00507225	36	CXCL12,AJUBA,AQP3,ERO1A,HYOU1,VEGFA,LIMD1,EGLN3,ITGA2,LDHA,SLC2A1,PPARD,HSP90B1,PSMA8,AK4,ETS1,ENG,HIGD1A,SRF,ENO1,CAPN2,VASN,PLK3,PLAU,ADAM15,SLC29A1,SLC9A1,TWIST1,PGK1,EGLN1,PSMD14,PSMA5,PSMD11,PSMD12,PSMD3,PSMC4
GO:BP	response to wounding	GO:0009611	0.00520741	40	AKAP1,CCN2,ZFP36,AJUBA,WFDC1,GPR4,NOS3,MAFF,CCN1,NLRP6,VEGFA,ADRA2B,SYT7,ITGA2,PPARD,GJA1,GIPR,VCL,ETS1,KDR,ENG,UBASH3B,ADORA2A,GIT1,SDC4,THBD,SRF,CLIC1,MAP2K1,EHD3,CSRP1,FLNA,HSPB1,PLAU,VWF,ARHGAP24,DYSF,PDGFRB,CD59,XBP1
GO:BP	regulation of peptide hormone secretion	GO:0090276	0.00522287	12	APLN,FFAR3,RAPGEF4,KCNG2,CPT1A,PFKL,SYT7,SLC2A1,PPARD,GJA1,GIPR,KLF7
GO:BP	intracellular signal transduction	GO:0035556	0.00538069	180	CCL1,HCRTR1,GPR17,SPRY4,NMUR1,CCN2,CNKSR3,SMPD3,STAC,CXCL12,ZFP36,AJUBA,AKAP12,GPR4,NOS3,FLT1,GAL,ERO1A,FGF12,TFRC,GADD45G,CCN1,CAVIN4,HYOU1,RAPGEF4,TRAF5,NLRP6,AGTR1,DISC1,PTGDR2,VEGFA,LIMD1,FGFR3,ADRA2B,ATF3,AMOTL2,TAF4B,SPTB,TP53TG5,SGK1,ECM1,PPARD,RRS1,GJA1,CCND1,RASGRF2,PSMA8,GIPR,BCL2L1,ARHGEF9,KDR,TEAD4,MSX1,CALR,ENG,TIMP3,SPRY1,MCL1,PLCL1,SPRED3,FGF13,RPF2,SYNGAP1,STYX,EEF1E1,PPP1R15A,ITG…
GO:BP	regulation of cell motility	GO:2000145	0.00541947	63	CCL1,NTNG2,SMPD3,CXCL12,AJUBA,AKAP12,ADAMTS1,FRMD5,NR4A3,HSPA5,ONECUT2,NOS3,FLT1,SMAD7,CCN1,VEGFA,AMOTL2,ITGA2,SGK1,ECM1,PPARD,GJA1,VCL,ETS1,KDR,CALR,ENG,PLXNA2,ANXA3,SDC4,NUS1,SPATA13,SRF,SPRED1,PLXNA1,PODXL,STK26,MYO1C,AKIRIN1,DNAJA4,PTPRG,FLNA,HSPB1,CLIC4,PIK3C2A,TMSB4X,STK10,PLAU,DLC1,ADAM15,PDGFRB,XBP1,SRCIN1,PTPN23,ACTN4,PPM1F,DAB2IP,MOSPD2,HDAC7,TWIST1,ITGB1,TMSB10,ABI3
GO:BP	nucleobase-containing compound transport	GO:0015931	0.00542428	32	ZFP36,SLC35B4,GJA1,SLC17A9,SLC35A3,SRSF1,CPSF6,SRSF2,SLC33A1,MYO1C,SLC29A1,HNRNPA3,LRRC8C,NOL6,SLC25A24,SRSF5,RFTN1,NUP93,SMG5,CPSF1,SLC35B1,POLR2D,SEH1L,KHSRP,SRSF3,EIF4E,SLC35A2,U2AF1,LRRC8A,HNRNPA2B1,TOMM20,DHX9
GO:BP	response to endogenous stimulus	GO:0009719	0.00547218	46	APLN,TUB,SPRY4,IL1RN,CCN2,SMPD3,CXCL12,ZFP36,FABP3,NR4A3,HSPA5,ONECUT2,NOS3,GAL,BMP6,FFAR3,FGF12,SMAD7,CCN1,PTPRE,AGTR1,CYSLTR2,FGFR3,ITGA2,LDHA,GOT1,AMHR2,SLC2A1,SMAD9,PPARD,HSP90B1,GJA1,CCND1,TIMP4,BCL2L1,ADAMTS12,ID1,ZNF366,P2RY2,MSX1,CALR,ENG,TIMP3,ATP1A1,CITED4,SPRY1
GO:BP	movement of cell or subcellular component	GO:0006928	0.00550202	54	CCL1,TUB,CACNA1G,NTNG2,DNAH2,CCN2,SLC16A3,CCDC151,NTN3,SMPD3,CXCL12,AJUBA,AKAP12,ADAMTS1,DYNC1I1,FRMD5,NR4A3,HSPA5,ONECUT2,NOS3,FLT1,FGF12,SMAD7,CCN1,AGTR1,ATP1B3,MDGA1,DISC1,KIF26B,SLC7A5,SOX8,VEGFA,ARL8A,LIMD1,AMOTL2,ITGA2,SPTB,SGK1,ECM1,PPARD,GJA1,TMEFF1,KLF7,ENPEP,ADAMTS12,ID1,VCL,TPM2,ETS1,KDR,FEZ1,CALR,NEDD4L,ENG
GO:BP	multicellular organism development	GO:0007275	0.00554489	120	APLN,TUB,PHOSPHO1,CACNA1G,GPR17,SPRY4,IL1RN,NTNG2,CCN2,CCDC151,NTN3,SMPD3,CXCL12,PIWIL3,ZFP36,MTHFD1L,ADAMTS1,GPR4,NR4A3,HSPA5,ONECUT2,ETV4,COL8A2,NOS3,FLT1,SAPCD2,ADAMTS4,MAFF,AQP3,GAL,BMP6,IL7R,SPATA5,ERO1A,FGF12,TFRC,GADD45G,SHROOM4,SMAD7,RAPH1,CCN1,CAVIN4,ACTA2,BHLHE40,AGTR1,MANF,PCDH18,CPT1A,MDGA1,DISC1,WDR77,KIF26B,ACTG2,SOX8,RDH13,VEGFA,FGFR3,ADRA2B,ATF3,AMOTL2,ITGA2,CNMD,SPTB,LDHA,PNP,SDK…
GO:BP	response to abiotic stimulus	GO:0009628	0.00591845	32	TRPM3,CCN2,STAC,CXCL12,AJUBA,AKAP12,GPR4,HSPA5,NOS3,AQP3,BMP6,ERO1A,HYOU1,BHLHE40,DISC1,RDH13,VEGFA,LIMD1,EGLN3,ITGA2,LDHA,GOT1,SLC2A1,PPARD,HSP90B1,GJA1,CCND1,GPR88,PSMA8,AK4,BCL2L1,HSPH1
GO:BP	endocrine process	GO:0050886	0.0059392	11	APLN,ACE2,NOS3,GAL,BMP6,AGTR1,GJA1,ENPEP,TBX3,CRY1,FZD4
GO:BP	organic acid transport	GO:0015849	0.00608943	14	SLC6A6,SLC16A3,FABP3,ACE2,FABP5,ABCC3,CPT1A,SLC7A5,SLC10A1,SLC2A1,PPARD,GJA1,FABP4,SLC51B
GO:BP	regulation of peptide secretion	GO:0002791	0.00630082	12	APLN,FFAR3,RAPGEF4,KCNG2,CPT1A,PFKL,SYT7,SLC2A1,PPARD,GJA1,GIPR,KLF7
GO:BP	cell migration	GO:0016477	0.00649786	79	CCL1,NTNG2,CCN2,SLC16A3,SMPD3,CXCL12,AJUBA,AKAP12,ADAMTS1,FRMD5,NR4A3,HSPA5,ONECUT2,NOS3,FLT1,SMAD7,CCN1,AGTR1,ATP1B3,MDGA1,DISC1,SLC7A5,SOX8,VEGFA,LIMD1,AMOTL2,ITGA2,SGK1,ECM1,PPARD,GJA1,ENPEP,ADAMTS12,ID1,VCL,ETS1,KDR,CALR,ENG,PLXNA2,FGF13,ANXA3,LAMC3,SDC4,NUS1,THBD,SPATA13,SRF,ITGA1,SPRED1,PLXNA1,PODXL,STK26,MYO1C,AKIRIN1,DNAJA4,PTPRG,FLNA,HSPB1,CLIC4,PIK3C2A,TMSB4X,STK10,PLAU,LRP8,RASGEF1A,AR…
GO:BP	regulation of tube diameter	GO:0035296	0.00657167	12	APLN,ACE2,NOS3,ACTA2,AGTR1,ADRA2B,GJA1,P2RY2,ADORA2A,SNTA1,ITGA1,GCH1
GO:BP	blood vessel diameter maintenance	GO:0097746	0.00657167	12	APLN,ACE2,NOS3,ACTA2,AGTR1,ADRA2B,GJA1,P2RY2,ADORA2A,SNTA1,ITGA1,GCH1
GO:BP	regulation of epithelial cell proliferation	GO:0050678	0.00662773	18	APLN,CXCL12,ZFP36,WFDC1,NR4A3,FLT1,BMP6,AGTR1,WDR77,VEGFA,CNMD,ECM1,PPARD,GJA1,CCND1,ID1,KDR,ENG
GO:BP	ribonucleoprotein complex assembly	GO:0022618	0.00668653	28	WDR77,RRS1,SRSF1,RPF2,CPSF6,PWP2,KHDC4,PRPF3,BOP1,SNRPF,HSP90AA1,SNRPD1,SRSF5,DENR,PTGES3,MRTO4,MRPL20,RUVBL2,GEMIN5,SNRPB,POLR2D,TAF9,SNRPC,SF3A2,SNRPD3,CDC73,DHX9,RAMAC
GO:BP	regulation of epithelial cell differentiation	GO:0030856	0.00685368	14	ZFP36,ETV4,MAFF,AQP3,BMP6,VEGFA,CCND1,KLF7,ID1,VCL,SPRY1,SPRED3,SPRED1,TBX3
GO:BP	regulation of peptide transport	GO:0090087	0.00691005	12	APLN,FFAR3,RAPGEF4,KCNG2,CPT1A,PFKL,SYT7,SLC2A1,PPARD,GJA1,GIPR,KLF7
GO:BP	cellular response to growth factor stimulus	GO:0071363	0.00692914	53	APLN,SPRY4,CCN2,SMPD3,ZFP36,HSPA5,ONECUT2,FLT1,BMP6,FGF12,SMAD7,CCN1,VEGFA,FGFR3,CNMD,GOT1,AMHR2,SMAD9,ADAMTS12,ID1,KDR,FEZ1,MSX1,ENG,SPRY1,SPRED3,NUS1,SPRED1,SLC33A1,MYO1C,COL4A2,VASN,HSPB1,FZD4,HGS,LRP8,PDGFRB,XBP1,SMAD6,DDX5,DAB2IP,PTBP1,EPN2,TMEM204,TWIST1,CBL,GCLM,NEDD4,MAP3K7,SNAI2,CLEC3B,KIF16B,HEYL
GO:BP	regulation of cell adhesion	GO:0030155	0.00701204	27	SPRY4,IL1RN,CXCL12,GPR4,FRMD5,NR4A3,ONECUT2,BMP6,IL7R,TFRC,SMAD7,CCN1,MDGA1,DISC1,KIF26B,VEGFA,ITGA2,PNP,HSPH1,VCL,ETS1,KDR,CALR,ENG,UBASH3B,PLXNA2,ADORA2A
GO:BP	regulation of tube size	GO:0035150	0.00709856	12	APLN,ACE2,NOS3,ACTA2,AGTR1,ADRA2B,GJA1,P2RY2,ADORA2A,SNTA1,ITGA1,GCH1
GO:BP	animal organ morphogenesis	GO:0009887	0.00744016	28	PHOSPHO1,NTNG2,CCN2,NTN3,SMPD3,MTHFD1L,ADAMTS1,ONECUT2,COL8A2,NOS3,SAPCD2,AQP3,BMP6,SMAD7,CCN1,ACTA2,KIF26B,ACTG2,SOX8,RDH13,VEGFA,FGFR3,ITGA2,SDK2,SERPINH1,PSMA8,TMEFF1,MICAL2
GO:BP	transport	GO:0006810	0.00852375	311	APLN,TUB,CACNA1G,TUBA4A,SLC6A6,IL1RN,CBARP,TRPM3,SLC16A5,NMUR1,CCN2,SLC16A3,LOXL4,CNKSR3,SMPD3,STAC,CXCL12,ZFP36,TINAGL1,FABP3,ACE2,NDUFA4L2,DYNC1I1,NR4A3,HSPA5,MASP1,FABP5,AQP3,GAL,BMP6,FFAR3,ERO1A,FGF12,SLC2A3,TFRC,GJA9,SRL,HYOU1,ABCC3,RAPGEF4,NLRP6,AGTR1,KCNG2,MANF,ATP1B3,CPT1A,PFKL,SLC7A5,VEGFA,ARL8A,ADRA2B,SYT7,SLC12A4,ITGA2,SPTB,SLC35B4,SLC10A1,PNP,SLC18A2,SLC2A1,SGK1,ECM1,PPARD,HSP90B1,RRS…
GO:BP	tissue development	GO:0009888	0.0086556	57	PHOSPHO1,CACNA1G,NTNG2,CCN2,NTN3,SMPD3,ZFP36,MTHFD1L,AJUBA,GPR4,ONECUT2,ETV4,NOS3,FABP5,SAPCD2,MAFF,AQP3,GAL,BMP6,SMAD7,CCN1,ACTA2,CPT1A,WDR77,EMP1,KIF26B,ACTG2,SOX8,VEGFA,FGFR3,ATF3,ITGA2,CNMD,ECM1,PPARD,GJA1,CCND1,SERPINH1,PSMA8,TMEFF1,KLF7,MICAL2,ADAMTS12,ID1,VCL,KDR,MSX1,CALR,ENG,TAGLN,SPRY1,PLXNA2,SPRED3,LAMC3,PKDCC,ALPL,SDC4
GO:BP	organic hydroxy compound transport	GO:0015850	0.00891083	13	SLC16A3,CXCL12,AQP3,GAL,BMP6,FFAR3,ABCC3,AGTR1,ADRA2B,SYT7,SLC10A1,SLC18A2,SLC51B
GO:BP	cellular response to hypoxia	GO:0071456	0.00915687	25	AJUBA,AQP3,ERO1A,HYOU1,VEGFA,LIMD1,EGLN3,PPARD,PSMA8,AK4,HIGD1A,ENO1,VASN,PLK3,SLC29A1,SLC9A1,TWIST1,PGK1,EGLN1,PSMD14,PSMA5,PSMD11,PSMD12,PSMD3,PSMC4
GO:BP	developmental process	GO:0032502	0.00966488	135	APLN,TUB,PHOSPHO1,CACNA1G,GPR17,SPRY4,SLC6A6,IL1RN,NTNG2,CCN2,CCDC151,NTN3,SMPD3,CXCL12,PIWIL3,ZFP36,MTHFD1L,AJUBA,FABP3,ADAMTS1,GPR4,NR4A3,HSPA5,ONECUT2,ETV4,COL8A2,NOS3,FABP5,FLT1,SAPCD2,ADAMTS4,MAFF,AQP3,GAL,BMP6,IL7R,SPATA5,ERO1A,FGF12,TFRC,GADD45G,SHROOM4,SMAD7,RAPH1,CCN1,CAVIN4,ACTA2,BHLHE40,TRIB2,AGTR1,MANF,PCDH18,CPT1A,MDGA1,DISC1,WDR77,EMP1,KIF26B,ACTG2,KIAA1522,SOX8,RDH13,VEGFA,CPM,LIMD…
GO:BP	ion transport	GO:0006811	0.00967467	45	CACNA1G,SLC6A6,CBARP,TRPM3,SLC16A5,NMUR1,CCN2,SLC16A3,CNKSR3,STAC,CXCL12,ACE2,NDUFA4L2,GAL,ERO1A,FGF12,TFRC,ABCC3,KCNG2,ATP1B3,SLC7A5,SYT7,SLC12A4,SLC35B4,SLC10A1,SLC18A2,SLC2A1,SGK1,GJA1,TMC8,CYSLTR1,RASGRF2,SLC51B,SLC17A9,ATP13A3,GLTPD2,NEDD4L,UBASH3B,KCNAB3,ATP1A1,ADORA2A,GRIK3,FGF13,SLC35A3,HECW2
GO:BP	regulation of locomotion	GO:0040012	0.0097715	64	CCL1,NTNG2,SMPD3,CXCL12,AJUBA,AKAP12,ADAMTS1,FRMD5,NR4A3,HSPA5,ONECUT2,NOS3,FLT1,SMAD7,CCN1,VEGFA,AMOTL2,ITGA2,SGK1,ECM1,PPARD,GJA1,VCL,ETS1,KDR,CALR,ENG,PLXNA2,ADORA2A,ANXA3,SDC4,NUS1,SPATA13,SRF,SPRED1,PLXNA1,PODXL,STK26,MYO1C,AKIRIN1,DNAJA4,PTPRG,FLNA,HSPB1,CLIC4,PIK3C2A,TMSB4X,STK10,PLAU,DLC1,ADAM15,PDGFRB,XBP1,SRCIN1,PTPN23,ACTN4,PPM1F,DAB2IP,MOSPD2,HDAC7,TWIST1,ITGB1,TMSB10,ABI3
GO:BP	cellular response to oxygen levels	GO:0071453	0.00986038	27	AJUBA,AQP3,ERO1A,HYOU1,VEGFA,LIMD1,EGLN3,PPARD,PSMA8,AK4,HIGD1A,ENO1,VASN,PLK3,SLC29A1,SLC9A1,TWIST1,CBL,PGK1,EGLN1,PSMD14,ATF4,PSMA5,PSMD11,PSMD12,PSMD3,PSMC4
GO:BP	regulation of sodium ion transmembrane transport	GO:1902305	0.00992785	13	FGF12,ATP1B3,NEDD4L,FGF13,HECW2,SNTA1,ACTN4,SLC9A1,STOM,NEDD4,WNK1,FXYD5,ATP2B4
GO:BP	'de novo' posttranslational protein folding	GO:0051084	0.0105383	9	HSPA5,ERO1A,HSPH1,UGGT1,SDF2L1,CHCHD4,DNAJB14,HSPA13,PTGES3
GO:BP	biological adhesion	GO:0022610	0.0108504	72	SPRY4,IL1RN,NTNG2,CCN2,CXCL12,AJUBA,ACE2,GPR4,FRMD5,NR4A3,ONECUT2,COL8A2,BMP6,IL7R,TFRC,SMAD7,CCN1,PCDH18,MDGA1,DISC1,KIF26B,VEGFA,ITGA2,PNP,SDK2,PPARD,HSPH1,ADAMTS12,ID1,VCL,ETS1,KDR,FEZ1,CALR,ENG,UBASH3B,PLXNA2,ADORA2A,HAPLN3,ASS1,LAMC3,SDC4,TMEM47,LRFN4,SRF,ITGA1,CLIC1,PLXNA1,PODXL,VEZT,ACTN1,LIMS2,CSRP1,FLNA,HSPB1,FZD4,STK10,AMIGO3,PLAU,VWF,DLC1,ADAM15,SCARF2,XBP1,SMAD6,SRCIN1,PTPN23,ACTN4,SL…
GO:BP	cell population proliferation	GO:0008283	0.0113968	49	APLN,CCN2,SMPD3,CXCL12,ZFP36,RARRES1,FABP3,ACE2,WFDC1,ADAMTS1,NR4A3,COL8A2,NOS3,FLT1,SAPCD2,GAL,BMP6,IL7R,TFRC,SMAD7,CCN1,TRAF5,AGTR1,DISC1,WDR77,SOX8,PTGDR2,VEGFA,FGFR3,ATF3,EGLN3,ITGA2,CNMD,PNP,SGK1,ECM1,PPARD,GJA1,CCND1,BCL2L1,ENPEP,ID1,TFAP2E,ETS1,KDR,MSX1,CALR,ENG,POLR3G
GO:BP	epithelial cell proliferation	GO:0050673	0.011645	19	APLN,CXCL12,ZFP36,WFDC1,NR4A3,COL8A2,FLT1,BMP6,AGTR1,WDR77,VEGFA,CNMD,ECM1,PPARD,GJA1,CCND1,ID1,KDR,ENG
GO:BP	cellular macromolecule localization	GO:0070727	0.0119181	145	TUB,STAC,ZFP36,AJUBA,HSPA5,SAPCD2,TFRC,SMAD7,ATP1B3,DISC1,VEGFA,HSP90B1,RRS1,GJA1,SLC51B,BCL2L1,ID1,SLC9A3R2,VCL,ARL5A,MSX1,CALR,TIMM8A,NEDD4L,FGF13,NACAD,SAR1B,SYTL2,CABP1,PKDCC,RPF2,SYNGAP1,STYX,PPP1R15A,TMEM88,CAMK1,MAP2,GOSR2,TARDBP,TIMM9,EHD3,CD68,MYO1C,SPCS3,GRPEL1,FLNA,HSPB1,PLK3,UFM1,HGS,TOMM40,TMSB4X,GNL3,CHCHD4,AHCYL1,CCT6A,GLIS2,VTI1A,PIGW,EDEM1,TRAM2,XBP1,PPM1F,TOMM5,SRPRB,IMMP1L,EMC4…
GO:BP	cellular protein localization	GO:0034613	0.0124846	144	TUB,STAC,AJUBA,HSPA5,SAPCD2,TFRC,SMAD7,ATP1B3,DISC1,VEGFA,HSP90B1,RRS1,GJA1,SLC51B,BCL2L1,ID1,SLC9A3R2,VCL,ARL5A,MSX1,CALR,TIMM8A,NEDD4L,FGF13,NACAD,SAR1B,SYTL2,CABP1,PKDCC,RPF2,SYNGAP1,STYX,PPP1R15A,TMEM88,CAMK1,MAP2,GOSR2,TARDBP,TIMM9,EHD3,CD68,MYO1C,SPCS3,GRPEL1,FLNA,HSPB1,PLK3,UFM1,HGS,TOMM40,TMSB4X,GNL3,CHCHD4,AHCYL1,CCT6A,GLIS2,VTI1A,PIGW,EDEM1,TRAM2,XBP1,PPM1F,TOMM5,SRPRB,IMMP1L,EMC4,FAM12…
GO:BP	regulation of anatomical structure morphogenesis	GO:0022603	0.0127477	75	SPRY4,NTNG2,CXCL12,ADAMTS1,GPR4,NOS3,FLT1,SAPCD2,TFRC,DISC1,SOX8,VEGFA,LIMD1,CNMD,ECM1,GJA1,PSMA8,ADAMTS12,ID1,ETS1,KDR,MSX1,CALR,NEDD4L,ENG,SPRY1,PLXNA2,FGF13,HECW2,ANXA3,SYNGAP1,SRF,SPRED1,PLXNA1,MAP2,MAP2K1,COL4A2,LIMS2,TBX2,FLNA,HSPB1,FZD4,HGS,LRP8,AKAP2,DLC1,XBP1,SRCIN1,NFATC4,ACTN4,L1CAM,DAB2IP,EPN2,TWIST1,ITGB1,ABI3,PGK1,EGLN1,MYH9,RHOBTB2,NEDD4,LARP4,SEMA4C,TMBIM1,CDC42EP4,PSMD14,GDI1,JMJ…
GO:BP	regulation of multicellular organismal development	GO:2000026	0.012825	42	PHOSPHO1,CCN2,SMPD3,CXCL12,ZFP36,ADAMTS1,GPR4,NR4A3,ETV4,NOS3,FLT1,MAFF,AQP3,GAL,BMP6,IL7R,SMAD7,CCN1,BHLHE40,DISC1,SOX8,VEGFA,CNMD,PNP,ECM1,PPARD,GJA1,CCND1,KLF7,DAAM2,ADAMTS12,ID1,VCL,ETS1,KDR,ENG,UBASH3B,SPRY1,PLXNA2,SPRED3,FGF13,ANXA3
GO:BP	ribonucleoprotein complex subunit organization	GO:0071826	0.0133649	28	WDR77,RRS1,SRSF1,RPF2,CPSF6,PWP2,KHDC4,PRPF3,BOP1,SNRPF,HSP90AA1,SNRPD1,SRSF5,DENR,PTGES3,MRTO4,MRPL20,RUVBL2,GEMIN5,SNRPB,POLR2D,TAF9,SNRPC,SF3A2,SNRPD3,CDC73,DHX9,RAMAC
GO:BP	endochondral ossification	GO:0001958	0.0134804	6	PHOSPHO1,SMPD3,BMP6,FGFR3,ALPL,MMP16
GO:BP	replacement ossification	GO:0036075	0.0134804	6	PHOSPHO1,SMPD3,BMP6,FGFR3,ALPL,MMP16
GO:BP	tube development	GO:0035295	0.0137014	66	APLN,CCN2,SMPD3,MTHFD1L,ADAMTS1,GPR4,COL8A2,NOS3,FLT1,SMAD7,CCN1,AGTR1,KIF26B,SOX8,VEGFA,AMOTL2,CNMD,ECM1,GJA1,MICAL2,ENPEP,ADAMTS12,ID1,ETS1,KDR,ENG,SPRY1,PLXNA2,ANXA3,ASS1,CCDC134,PKDCC,SDC4,NUS1,SRF,SPRED1,PODXL,MAP2K1,TBX3,TIPARP,COL4A2,TBX2,FLNA,HSPB1,COL4A1,FZD4,CLIC4,HGS,PIK3C2A,SHB,ARHGAP24,DLC1,ADAM15,PDGFRB,XBP1,SMAD6,NFATC4,JMJD6,DAB2IP,EPN2,HDAC7,TWIST1,ITGB1,PGK1,EGLN1,MYH9
GO:BP	locomotion	GO:0040011	0.0145017	91	CCL1,NTNG2,DNAH2,CCN2,SLC16A3,NTN3,SMPD3,CXCL12,AJUBA,AKAP12,ADAMTS1,FRMD5,NR4A3,HSPA5,ONECUT2,NOS3,FLT1,SMAD7,CCN1,AGTR1,ATP1B3,MDGA1,DISC1,SLC7A5,SOX8,PTGDR2,VEGFA,LIMD1,AMOTL2,ITGA2,SPTB,SGK1,ECM1,PPARD,GJA1,CYSLTR1,TMEFF1,KLF7,ENPEP,ADAMTS12,ID1,VCL,ETS1,KDR,FEZ1,CALR,ENG,PLXNA2,ADORA2A,FGF13,ANXA3,LAMC3,SDC4,NUS1,THBD,SPATA13,SRF,ITGA1,SPRED1,PLXNA1,PODXL,MAP2K1,STK26,MYO1C,AKIRIN1,DNAJA4,PT…
GO:BP	regulation of protein localization	GO:0032880	0.0153051	77	STAC,SAPCD2,BMP6,TFRC,RAPGEF4,KCNG2,CPT1A,PFKL,VEGFA,SYT7,SLC2A1,PPARD,GJA1,SLC51B,GIPR,KLF7,BCL2L1,VCL,NEDD4L,ADORA2A,SAR1B,CABP1,PKDCC,CAMK1,MAP2,TARDBP,MYO1C,RSL1D1,FLNA,PLK3,UFM1,GNL3,CCT6A,GLIS2,EDEM1,XBP1,FRMD4A,SRCIN1,PTPN23,PPM1F,DPH3,UHMK1,SLC5A3,STOM,ITGB1,ABI3,SLC16A1,MESD,HSP90AA1,WRAP53,TMBIM1,VAMP2,GDI1,TMED10,BYSL,GSK3A,PLK1,CCT5,ARHGDIA,MAVS,ZPR1,TMEM30A,PDCD5,ATP2B4,SNX33,SEC16A,…
GO:BP	response to drug	GO:0042493	0.0161299	19	FABP3,WFDC1,HSPA5,GAL,TFRC,ABCC3,CPT1A,ITGA2,SLC10A1,LDHA,PNP,CCND1,AK4,TIMP4,CALR,ENG,ATP1A1,ADORA2A,ASS1
GO:BP	regulation of mRNA metabolic process	GO:1903311	0.0161557	43	ZFP36,TRAF5,CSDC2,PSMA8,NT5C3B,CPSF6,MBNL3,PDE12,TARDBP,SRSF2,DIS3,HSPB1,AHCYL1,JMJD6,DDX5,PTBP1,PSMD14,YBX3,PSMA5,PSMD11,PSMD12,PSMD3,RBMX,PSMC4,METTL3,RC3H2,POLR2D,CNOT9,SYNCRIP,PAF1,KHSRP,SRSF3,PSME3,EXOSC8,EIF4G1,HNRNPA2B1,CDC73,DHX9,SAMD4B,SET,YTHDF1,DIS3L2,RBM42
GO:BP	regulation of response to endoplasmic reticulum stress	GO:1905897	0.0166904	16	HSPA5,HYOU1,MANF,BCL2L1,PPP1R15A,FICD,LPCAT3,TMEM33,XBP1,DAB2IP,BAX,ATF6,RNFT1,DNAJC3,ERN1,TXNDC12
GO:BP	vascular endothelial growth factor receptor signaling pathway	GO:0048010	0.0168398	14	FLT1,VEGFA,CNMD,KDR,HSPB1,FZD4,HGS,SHB,XBP1,DAB2IP,EPN2,TMEM204,HSP90AA1,NEDD4
GO:BP	cell adhesion	GO:0007155	0.0176272	71	SPRY4,IL1RN,NTNG2,CCN2,CXCL12,AJUBA,GPR4,FRMD5,NR4A3,ONECUT2,COL8A2,BMP6,IL7R,TFRC,SMAD7,CCN1,PCDH18,MDGA1,DISC1,KIF26B,VEGFA,ITGA2,PNP,SDK2,PPARD,HSPH1,ADAMTS12,ID1,VCL,ETS1,KDR,FEZ1,CALR,ENG,UBASH3B,PLXNA2,ADORA2A,HAPLN3,ASS1,LAMC3,SDC4,TMEM47,LRFN4,SRF,ITGA1,CLIC1,PLXNA1,PODXL,VEZT,ACTN1,LIMS2,CSRP1,FLNA,HSPB1,FZD4,STK10,AMIGO3,PLAU,VWF,DLC1,ADAM15,SCARF2,XBP1,SMAD6,SRCIN1,PTPN23,ACTN4,SLC9A1,…
GO:BP	multicellular organismal process	GO:0032501	0.0182964	153	AKAP1,APLN,CCL1,TUB,PHOSPHO1,CACNA1G,GPR17,SPRY4,SLC6A6,IL1RN,NTNG2,TRPM3,NMUR1,CCN2,CCDC151,NTN3,SMPD3,STAC,CXCL12,PIWIL3,ZFP36,MTHFD1L,ACE2,AKAP12,ADAMTS1,GPR4,NR4A3,HSPA5,ONECUT2,ETV4,COL8A2,NOS3,FABP5,FLT1,SAPCD2,ADAMTS4,MAFF,AQP3,GAL,BMP6,IL7R,FFAR3,SPATA5,ERO1A,FGF12,SLC2A3,TFRC,GADD45G,SHROOM4,SMAD7,RAPH1,CCN1,CAVIN4,ACTA2,BHLHE40,TRIB2,ABCC3,NLRP6,AGTR1,KCNG2,MANF,RGS16,ATP1B3,PCDH18,CPT1…
GO:BP	response to chemical	GO:0042221	0.0183014	150	APLN,CCL1,TUB,CACNA1G,GPR17,SPRY4,IL1RN,CCN2,NTN3,SMPD3,CXCL12,ZFP36,AJUBA,FABP3,WFDC1,AKAP12,NR4A3,HSPA5,ONECUT2,NOS3,FLT1,AQP3,GAL,BMP6,IL7R,FFAR3,ERO1A,FGF12,TFRC,SMAD7,CCN1,HYOU1,ABCC3,PTPRE,TRAF5,AGTR1,MANF,CYSLTR2,CPT1A,PFKL,PTGDR2,VEGFA,LIMD1,FGFR3,ATF3,SYT7,EGLN3,ITGA2,CNMD,SPTB,SLC10A1,LDHA,GOT1,PNP,SLC18A2,AMHR2,SLC2A1,SMAD9,ECM1,PPARD,HSP90B1,GJA1,CCND1,CYSLTR1,SERPINH1,FABP4,PSMA8,AK4…
GO:BP	protein localization to organelle	GO:0033365	0.0203582	84	TUB,HSPA5,TFRC,DISC1,VEGFA,RRS1,GJA1,ARL5A,MSX1,CALR,TIMM8A,CABP1,RPF2,PPP1R15A,GOSR2,TARDBP,TIMM9,CD68,SPCS3,GRPEL1,FLNA,UFM1,HGS,TOMM40,GNL3,CHCHD4,CCT6A,GLIS2,VTI1A,EDEM1,TRAM2,XBP1,TOMM5,SRPRB,IMMP1L,EMC4,HK1,TIMM17A,HSP90AA1,NEDD4,WRAP53,HSPA4,TIMM50,NUP93,MMGT1,BUB3,TNKS2,VAMP2,TIMM13,RAB10,TMED10,BYSL,EMC8,TIMM10B,GSK3A,PLK1,BAX,RUVBL2,STAT3,CCT5,MAVS,ZPR1,TMEM30A,PDCD5,SEC16A,SEC63,PAF1,K…
GO:BP	negative regulation of biological process	GO:0048519	0.020697	174	APLN,GPR17,SPRY4,IL1RN,CBARP,CCN2,CNKSR3,SMPD3,CXCL12,PIWIL3,ZFP36,RARRES1,AJUBA,FABP3,WFDC1,ADAMTS1,GPR4,FRMD5,NR4A3,HSPA5,ONECUT2,MASP1,NOS3,FABP5,FLT1,SAPCD2,GAL,BMP6,IL7R,ERO1A,FGF12,TFRC,SMAD7,CCN1,HYOU1,BHLHE40,TRIB2,PTPRE,TRAF5,NLRP6,CSDC2,RGS16,CYSLTR2,WDR77,PFKL,SLC7A5,SOX8,PTGDR2,VEGFA,LIMD1,FGFR3,ADRA2B,ATF3,CNMD,PPP1R14A,SPTB,GOT1,TP53TG5,SLC18A2,SMAD9,ECM1,PPARD,HSP90B1,GJA1,CCND1,TM…
GO:BP	cartilage development	GO:0051216	0.020761	14	CCN2,SMPD3,BMP6,SMAD7,CCN1,FGFR3,CNMD,ECM1,SERPINH1,ADAMTS12,MSX1,PKDCC,SRF,CHSY1
GO:BP	endocrine hormone secretion	GO:0060986	0.0236446	8	APLN,GAL,BMP6,AGTR1,GJA1,TBX3,CRY1,FZD4
GO:BP	protein localization	GO:0008104	0.0249858	189	TUB,ACOX2,IL1RN,STAC,AJUBA,HSPA5,SAPCD2,GAL,BMP6,TFRC,SMAD7,RAPGEF4,KCNG2,ATP1B3,CPT1A,DISC1,PFKL,VEGFA,ARL8A,SYT7,ITGA2,SLC2A1,PPARD,HSP90B1,RRS1,GJA1,SLC51B,GIPR,KLF7,BCL2L1,ID1,SLC9A3R2,VCL,ARL5A,MSX1,CALR,TIMM8A,NEDD4L,MCL1,ADORA2A,FGF13,NACAD,SAR1B,SYTL2,RILP,PDIA4,CABP1,PKDCC,RPF2,SYNGAP1,STYX,PPP1R15A,TMEM88,CAMK1,MAP2,MDFI,GOSR2,TARDBP,TIMM9,EHD3,CD68,MYO1C,SPCS3,GRPEL1,RSL1D1,FLNA,HSPB1,…
GO:BP	metal ion homeostasis	GO:0055065	0.0254408	24	CCL1,HCRTR1,GPR17,CXCL12,GPR4,BMP6,ERO1A,TFRC,AGTR1,ATP1B3,DISC1,SLC12A4,GOT1,HSP90B1,GJA1,TMC8,CYSLTR1,GIPR,ATP13A3,CALR,NEDD4L,UBASH3B,ATP1A1,ADORA2A
GO:BP	cardiac muscle contraction	GO:0060048	0.0257444	13	CACNA1G,CCN2,ACE2,FGF12,SMAD7,GJA1,NEDD4L,ATP1A1,FGF13,SNTA1,EHD3,KCNJ8,FLNA
GO:BP	transport across blood-brain barrier	GO:0150104	0.0264309	7	SLC6A6,FABP5,SLC2A3,TFRC,ABCC3,SLC7A5,SLC2A1
GO:BP	'de novo' protein folding	GO:0006458	0.0268846	9	HSPA5,ERO1A,HSPH1,UGGT1,SDF2L1,CHCHD4,DNAJB14,HSPA13,PTGES3
GO:BP	negative regulation of intracellular signal transduction	GO:1902532	0.026975	48	SPRY4,CNKSR3,CXCL12,AJUBA,HYOU1,NLRP6,LIMD1,ATF3,BCL2L1,TIMP3,SPRY1,MCL1,SPRED3,SYNGAP1,SPRED1,BAG5,RNF149,ENO1,LITAF,SEC14L1,HSPB1,TMSB4X,RNF152,ARHGAP24,DLC1,TNFAIP1,WWC2,XBP1,DAB2IP,HIPK3,CRYBA1,USP10,HDAC7,RCAN1,PDE10A,TWIST1,ITGB1,ARHGAP42,SNAI2,SH2B3,YBX3,CARD19,PLEKHA1,GSK3A,CAVIN3,DUSP7,ATP2B4,TAF9
GO:BP	cell-cell signaling	GO:0007267	0.0271159	38	APLN,HCRTR1,CACNA1G,SLC6A6,IL1RN,NTNG2,SMPD3,CXCL12,AKAP12,FABP5,GAL,BMP6,FFAR3,FGF12,GJA9,RAPGEF4,AGTR1,KCNG2,CPT1A,DISC1,PFKL,LIMD1,FGFR3,ADRA2B,SYT7,AMOTL2,SLC12A4,SLC18A2,SLC2A1,PPARD,GJA1,CCND1,RASGRF2,PSMA8,GIPR,KLF7,ENPEP,DAAM2
GO:BP	proteasomal protein catabolic process	GO:0010498	0.0311669	51	HSPA5,SMAD7,TRIB2,HSP90B1,PSMA8,UGGT1,NEDD4L,HECW2,STYX,ERLIN1,SDF2L1,BAG5,ZFAND2A,PLK3,EDEM1,TNFAIP1,DNAJB14,XBP1,DAB2IP,UBE2V2,DET1,NEDD4,HSPBP1,RNF121,SOCS4,BUB3,PSMD14,RNF7,PSMA5,PSMD11,PSMD12,TRIM3,PSMD3,GSK3A,PLK1,PSMC4,RNF14,USP5,SOCS6,GLMN,RNFT1,TAF9,STT3B,PSME3,CDC26,RHBDF1,ZFAND2B,UBE4A,PCNP,TMF1,RAD23A
GO:BP	calcium ion transport	GO:0006816	0.0313135	7	CACNA1G,CBARP,TRPM3,NMUR1,CCN2,STAC,CXCL12
GO:BP	system process	GO:0003008	0.0313481	30	APLN,TUB,CACNA1G,SLC6A6,TRPM3,NMUR1,CCN2,STAC,CXCL12,ACE2,AKAP12,GPR4,NR4A3,NOS3,FABP5,AQP3,GAL,BMP6,FFAR3,FGF12,SLC2A3,TFRC,SHROOM4,SMAD7,ACTA2,ABCC3,AGTR1,KCNG2,RGS16,ATP1B3
GO:BP	maturation of SSU-rRNA	GO:0030490	0.0322567	12	RRS1,TSR1,WDR46,NOP14,NAT10,PWP2,NOP9,BYSL,UTP4,NOB1,UTP6,RIOK2
GO:BP	regulation of ERK1 and ERK2 cascade	GO:0070372	0.033302	11	CCL1,HCRTR1,SPRY4,CCN2,CNKSR3,AKAP12,CCN1,NLRP6,VEGFA,FGFR3,ATF3
GO:BP	exocytosis	GO:0006887	0.0341659	77	CACNA1G,TUBA4A,CBARP,SMPD3,NR4A3,FABP5,SLC2A3,RAPGEF4,MANF,PFKL,VEGFA,ARL8A,SYT7,PNP,ECM1,SLC17A9,VCL,TIMP3,ADORA2A,GIT1,ANXA3,SYTL2,MLEC,SDC4,ENDOD1,PRRT2,TMC6,ACTN1,CD68,FLNA,PHACTR2,HGS,PIK3C2A,TMSB4X,STK10,ERP44,PGM2,PLAU,VWF,CD59,SRCIN1,ACTN4,TUBB4B,PGAM1,ATP11A,MOSPD2,LIN7C,CBL,STOM,TAGLN2,MYH9,HSP90AA1,TMBIM1,CLEC3B,CMTM6,PSMD14,VAMP2,RAB10,TMED10,PSMA5,PSMD11,PSMD12,PSMD3,CAP1,EXOC6B,SNX1…
GO:BP	ER-nucleus signaling pathway	GO:0006984	0.0351504	11	HSPA5,HSP90B1,CALR,PPP1R15A,ERLIN1,LPCAT3,TMEM33,XBP1,ATF4,EIF2S1,ATF6
GO:BP	positive regulation of multicellular organismal process	GO:0051240	0.0353192	40	APLN,CCL1,CCN2,CXCL12,ACE2,AKAP12,NR4A3,ETV4,NOS3,FABP5,FLT1,GAL,BMP6,IL7R,FFAR3,TFRC,GADD45G,SMAD7,CCN1,DISC1,SLC7A5,SOX8,VEGFA,ADRA2B,ITGA2,PNP,ECM1,GJA1,CCND1,FABP4,ETS1,KDR,TEAD4,P2RY2,ENG,POLR3G,ATP1A1,SPRY1,PLXNA2,ADORA2A
GO:BP	regulation of system process	GO:0044057	0.0362274	18	APLN,CACNA1G,CCN2,ACE2,NR4A3,NOS3,FABP5,GAL,BMP6,FGF12,SMAD7,AGTR1,KCNG2,ATP1B3,ADRA2B,ITGA2,SGK1,GJA1
GO:BP	regulation of cellular protein localization	GO:1903827	0.0364291	50	STAC,SAPCD2,TFRC,VEGFA,SLC51B,BCL2L1,NEDD4L,SAR1B,CABP1,PKDCC,CAMK1,MAP2,TARDBP,MYO1C,FLNA,PLK3,UFM1,GNL3,CCT6A,GLIS2,EDEM1,XBP1,PPM1F,UHMK1,SLC5A3,STOM,ITGB1,ABI3,MESD,HSP90AA1,WRAP53,TMBIM1,VAMP2,GDI1,BYSL,GSK3A,PLK1,CCT5,MAVS,ZPR1,TMEM30A,PDCD5,ATP2B4,SNX33,SEC16A,LEPROTL1,HRAS,ACTB,NMD3,LMAN1
GO:BP	positive regulation of cell migration by vascular endothelial growth factor signaling pathway	GO:0038089	0.0366988	4	VEGFA,KDR,MYO1C,HSPB1
GO:BP	chaperone-mediated protein folding	GO:0061077	0.0380541	11	HSPA5,ERO1A,HSPH1,PDIA4,SDF2L1,HSPB1,DNAJC24,DNAJB14,CHORDC1,HSPA13,PTGES3
GO:BP	regulation of anatomical structure size	GO:0090066	0.0394499	24	APLN,CXCL12,ACE2,NOS3,IL7R,ACTA2,AGTR1,DISC1,VEGFA,ADRA2B,SLC12A4,SPTB,GJA1,KANK4,P2RY2,ADORA2A,FGF13,RILP,SNTA1,PPP1R15A,SRF,ITGA1,GCH1,MAP2
GO:BP	cardiac epithelial to mesenchymal transition	GO:0060317	0.0394868	8	MSX1,ENG,SPRY1,TBX3,ADAM15,TWIST1,SNAI2,HEYL
GO:BP	protein targeting to mitochondrion	GO:0006626	0.0404042	17	TIMM8A,TIMM9,GRPEL1,TOMM40,CHCHD4,TOMM5,IMMP1L,TIMM17A,HSP90AA1,HSPA4,TIMM50,TIMM13,TIMM10B,GSK3A,PDCD5,LMAN1,TOMM20
GO:BP	regulation of endoplasmic reticulum unfolded protein response	GO:1900101	0.0422356	9	HSPA5,PPP1R15A,FICD,TMEM33,XBP1,DAB2IP,BAX,ATF6,ERN1
GO:BP	nuclear export	GO:0051168	0.0444852	27	RRS1,CALR,SRSF1,STYX,CPSF6,LTV1,CAMK1,SRSF2,AHCYL1,ATXN1,NOL6,UHMK1,NOP9,SRSF5,NUP93,SMG5,CPSF1,ABCE1,POLR2D,SEH1L,NMD3,SRSF3,EIF4E,U2AF1,HNRNPA2B1,DHX9,RIOK2
GO:BP	regulation of endocrine process	GO:0044060	0.0451397	5	APLN,GAL,BMP6,AGTR1,GJA1
GO:BP	regulation of insulin secretion	GO:0050796	0.0452321	10	RAPGEF4,KCNG2,CPT1A,PFKL,SYT7,SLC2A1,PPARD,GJA1,GIPR,KLF7
GO:BP	positive regulation of transport	GO:0051050	0.0464483	49	APLN,TUB,CACNA1G,CNKSR3,SMPD3,STAC,CXCL12,FABP3,ACE2,NR4A3,GAL,BMP6,FGF12,ATP1B3,VEGFA,SYT7,ITGA2,SGK1,PPARD,GJA1,SLC51B,GIPR,P2RY2,FEZ1,CALR,NEDD4L,ADORA2A,SAR1B,SDC4,PRRT2,CPSF6,CAMK1,MAP2,TARDBP,EHD3,MYO1C,FLNA,PLK3,LPCAT3,HGS,TMSB4X,AHCYL1,EDEM1,PDGFRB,XBP1,FRMD4A,PTPN23,ACTN4,SLC9A1
GO:BP	localization of cell	GO:0051674	0.0486504	82	CCL1,NTNG2,DNAH2,CCN2,SLC16A3,SMPD3,CXCL12,AJUBA,AKAP12,ADAMTS1,FRMD5,NR4A3,HSPA5,ONECUT2,NOS3,FLT1,SMAD7,CCN1,AGTR1,ATP1B3,MDGA1,DISC1,SLC7A5,SOX8,VEGFA,LIMD1,AMOTL2,ITGA2,SGK1,ECM1,PPARD,GJA1,ENPEP,ADAMTS12,ID1,VCL,ETS1,KDR,CALR,ENG,PLXNA2,FGF13,ANXA3,LAMC3,SDC4,NUS1,THBD,SPATA13,SRF,ITGA1,SPRED1,PLXNA1,PODXL,MAP2K1,STK26,MYO1C,AKIRIN1,DNAJA4,PTPRG,FLNA,HSPB1,CLIC4,PIK3C2A,TMSB4X,IER2,STK10,PLA…
GO:BP	cell motility	GO:0048870	0.0486504	82	CCL1,NTNG2,DNAH2,CCN2,SLC16A3,SMPD3,CXCL12,AJUBA,AKAP12,ADAMTS1,FRMD5,NR4A3,HSPA5,ONECUT2,NOS3,FLT1,SMAD7,CCN1,AGTR1,ATP1B3,MDGA1,DISC1,SLC7A5,SOX8,VEGFA,LIMD1,AMOTL2,ITGA2,SGK1,ECM1,PPARD,GJA1,ENPEP,ADAMTS12,ID1,VCL,ETS1,KDR,CALR,ENG,PLXNA2,FGF13,ANXA3,LAMC3,SDC4,NUS1,THBD,SPATA13,SRF,ITGA1,SPRED1,PLXNA1,PODXL,MAP2K1,STK26,MYO1C,AKIRIN1,DNAJA4,PTPRG,FLNA,HSPB1,CLIC4,PIK3C2A,TMSB4X,IER2,STK10,PLA…
GO:BP	intracellular transport	GO:0046907	0.0489215	134	TUB,TINAGL1,FABP3,DYNC1I1,HSPA5,SRL,HYOU1,CPT1A,ARL8A,SYT7,SPTB,HSP90B1,RRS1,SLC51B,TMEM50B,ARL5A,FEZ1,CALR,TIMM8A,NACAD,SAR1B,SYTL2,RILP,SRSF1,CABP1,STYX,NUS1,CPSF6,ATP5MC1,LTV1,CAMK1,MAP2,MAP2K1,GOSR2,TARDBP,SRSF2,TIMM9,EHD3,MYO1C,SPCS3,GRPEL1,FLNA,HSPB1,PLK3,UFM1,HGS,TOMM40,CHCHD4,AHCYL1,VTI1A,ERGIC1,EDEM1,TRAM2,CD59,XBP1,PTPN23,ACTN4,TOMM5,ATXN1,SRPRB,IMMP1L,NOL6,UHMK1,LMTK2,STOM,NOP9,SNRPF,T…
GO:BP	chondrocyte differentiation	GO:0002062	0.0493981	10	CCN2,SMPD3,BMP6,SMAD7,FGFR3,ECM1,SERPINH1,ADAMTS12,PKDCC,CHSY1
GO:CC	cytoplasm	GO:0005737	2.38172e-12	739	AKAP1,APLN,TUB,PHOSPHO1,ACOX2,CACNA1G,TUBA4A,SPRY4,UPP1,IL1RN,CBARP,DNAH2,CCN2,CCDC151,NTN3,CNKSR3,P4HA1,SMPD3,STAC,ACOT7,CXCL12,PIWIL3,ZFP36,TINAGL1,MTHFD1L,ANKRD37,GK,AJUBA,FABP3,ACE2,AKAP12,ADAMTS1,NDUFA4L2,DYNC1I1,HSPA5,MASP1,COL8A2,NOS3,FABP5,FLT1,SAPCD2,MAFF,CRELD2,AQP3,GAL,BMP6,IL7R,PLCXD1,SPATA5,ERO1A,FGF12,SLC2A3,TFRC,GADD45G,SHROOM4,SMAD7,CHST3,RAPH1,SRL,CCN1,CAVIN4,ACTA2,HYOU1,BHLHE40,…
GO:CC	intracellular membrane-bounded organelle	GO:0043231	5.71504e-12	742	AKAP1,TUB,ACOX2,UPP1,CBARP,CCN2,SLC16A3,NTN3,P4HA1,SMPD3,ACOT7,CXCL12,PIWIL3,ZFP36,TINAGL1,PNMA2,MTHFD1L,ANKRD37,GK,AJUBA,ACE2,ADAMTS1,NDUFA4L2,DYNC1I1,NR4A3,HSPA5,ONECUT2,ETV4,MASP1,COL8A2,NOS3,FABP5,FLT1,SAPCD2,ADAMTS4,MAFF,CRELD2,AQP3,GAL,IL7R,SPATA5,ERO1A,FGF12,SLC2A3,TFRC,GADD45G,SHROOM4,SMAD7,CHST3,RAPH1,SRL,CCN1,HYOU1,BHLHE40,TRIB2,PTPRE,NLRP6,MANF,CSDC2,ANKRD61,ATP1B3,CPT1A,MDGA1,DISC1,WD…
GO:CC	intracellular anatomical structure	GO:0005622	1.65508e-11	867	AKAP1,APLN,TUB,PHOSPHO1,ACOX2,CACNA1G,TUBA4A,SPRY4,UPP1,IL1RN,CBARP,DNAH2,CCN2,SLC16A3,CCDC151,NTN3,CNKSR3,P4HA1,SMPD3,STAC,ACOT7,CXCL12,PIWIL3,ZFP36,TINAGL1,PNMA2,MTHFD1L,ANKRD37,GK,AJUBA,FABP3,ACE2,AKAP12,ADAMTS1,NDUFA4L2,DYNC1I1,FRMD5,NR4A3,HSPA5,ONECUT2,ETV4,MASP1,COL8A2,NOS3,FABP5,FLT1,SAPCD2,ADAMTS4,MAFF,CRELD2,AQP3,GAL,BMP6,IL7R,PLCXD1,SPATA5,ERO1A,FGF12,SLC2A3,TFRC,GADD45G,SHROOM4,SMAD7,C…
GO:CC	preribosome	GO:0030684	4.62277e-11	25	RRS1,NIP7,TSR1,WDR46,LTV1,NOP14,WDR12,MAK16,RSL1D1,PWP2,RRP15,BOP1,NOL6,IMP4,NOP9,WDR36,MRTO4,FTSJ3,FBL,BYSL,PDCD11,UTP4,NOB1,UTP6,RIOK2
GO:CC	intracellular organelle	GO:0043229	2.14836e-09	782	AKAP1,TUB,ACOX2,TUBA4A,UPP1,CBARP,DNAH2,CCN2,SLC16A3,CCDC151,NTN3,P4HA1,SMPD3,ACOT7,CXCL12,PIWIL3,ZFP36,TINAGL1,PNMA2,MTHFD1L,ANKRD37,GK,AJUBA,ACE2,AKAP12,ADAMTS1,NDUFA4L2,DYNC1I1,FRMD5,NR4A3,HSPA5,ONECUT2,ETV4,MASP1,COL8A2,NOS3,FABP5,FLT1,SAPCD2,ADAMTS4,MAFF,CRELD2,AQP3,GAL,IL7R,SPATA5,ERO1A,FGF12,SLC2A3,TFRC,GADD45G,SHROOM4,SMAD7,CHST3,RAPH1,SRL,CCN1,CAVIN4,ACTA2,HYOU1,BHLHE40,TRIB2,PTPRE,TRAF5…
GO:CC	membrane-enclosed lumen	GO:0031974	2.85095e-09	390	ACOX2,UPP1,P4HA1,ACOT7,PNMA2,MTHFD1L,ANKRD37,AJUBA,ACE2,NR4A3,HSPA5,ONECUT2,ETV4,MASP1,COL8A2,FABP5,SAPCD2,ADAMTS4,MAFF,AQP3,IL7R,ERO1A,SHROOM4,SMAD7,RAPH1,SRL,CCN1,HYOU1,BHLHE40,MANF,ANKRD61,WDR77,PFKL,VEGFA,LIMD1,ATF3,EGLN3,TAF4B,MARS2,GOT1,TP53TG5,PNP,SGK1,SMAD9,ECM1,PPARD,HSP90B1,RRS1,GJA1,CCND1,SERPINH1,AK4,KLF7,PNO1,BCL2L1,MRI1,HSPH1,NIP7,ID1,GAR1,CCDC86,VCL,EPOP,ETS1,TEAD4,MSX1,RRP12,LNPEP…
GO:CC	organelle lumen	GO:0043233	2.85095e-09	390	ACOX2,UPP1,P4HA1,ACOT7,PNMA2,MTHFD1L,ANKRD37,AJUBA,ACE2,NR4A3,HSPA5,ONECUT2,ETV4,MASP1,COL8A2,FABP5,SAPCD2,ADAMTS4,MAFF,AQP3,IL7R,ERO1A,SHROOM4,SMAD7,RAPH1,SRL,CCN1,HYOU1,BHLHE40,MANF,ANKRD61,WDR77,PFKL,VEGFA,LIMD1,ATF3,EGLN3,TAF4B,MARS2,GOT1,TP53TG5,PNP,SGK1,SMAD9,ECM1,PPARD,HSP90B1,RRS1,GJA1,CCND1,SERPINH1,AK4,KLF7,PNO1,BCL2L1,MRI1,HSPH1,NIP7,ID1,GAR1,CCDC86,VCL,EPOP,ETS1,TEAD4,MSX1,RRP12,LNPEP…
GO:CC	intracellular organelle lumen	GO:0070013	2.85095e-09	390	ACOX2,UPP1,P4HA1,ACOT7,PNMA2,MTHFD1L,ANKRD37,AJUBA,ACE2,NR4A3,HSPA5,ONECUT2,ETV4,MASP1,COL8A2,FABP5,SAPCD2,ADAMTS4,MAFF,AQP3,IL7R,ERO1A,SHROOM4,SMAD7,RAPH1,SRL,CCN1,HYOU1,BHLHE40,MANF,ANKRD61,WDR77,PFKL,VEGFA,LIMD1,ATF3,EGLN3,TAF4B,MARS2,GOT1,TP53TG5,PNP,SGK1,SMAD9,ECM1,PPARD,HSP90B1,RRS1,GJA1,CCND1,SERPINH1,AK4,KLF7,PNO1,BCL2L1,MRI1,HSPH1,NIP7,ID1,GAR1,CCDC86,VCL,EPOP,ETS1,TEAD4,MSX1,RRP12,LNPEP…
GO:CC	focal adhesion	GO:0005925	5.52083e-09	49	SPRY4,AJUBA,AKAP12,HSPA5,FLT1,SHROOM4,HYOU1,LIMD1,FGFR3,ITGA2,HSP90B1,GJA1,SLC9A3R2,VCL,CALR,ENG,GIT1,SDC4,ITGA1,MAP2K1,EHD3,ACTN1,CAPN2,LIMS2,CSRP1,FLNA,HSPB1,PLAU,ARHGAP24,DLC1,PDIA3,SCARF2,PDGFRB,CD59,ACTN4,SLC9A1,L1CAM,STARD8,REXO2,CBL,ITGB1,MYH9,MARCKS,G3BP1,ATAT1,RAB10,VASP,ARPC5L,CAP1
GO:CC	anchoring junction	GO:0070161	8.29275e-09	63	SPRY4,AJUBA,AKAP12,FRMD5,HSPA5,FLT1,SAPCD2,AQP3,GJA9,SHROOM4,SMAD7,HYOU1,VEGFA,LIMD1,FGFR3,AMOTL2,ITGA2,SLC2A1,HSP90B1,GJA1,CCND1,SLC9A3R2,VCL,CALR,ENG,ATP1A1,GIT1,FGF13,PMP22,SDC4,TMEM47,ITGA1,PODXL,MAP2K1,VEZT,EHD3,ACTN1,CAPN2,LIMS2,CSRP1,FLNA,HSPB1,FZD4,CLIC4,PLAU,ARHGAP24,DLC1,ADAM15,PDIA3,SCARF2,PDGFRB,CD59,FRMD4A,SYNPO,ACTN4,SLC9A1,L1CAM,STARD8,REXO2,LIN7C,TMEM204,CBL,ITGB1
GO:CC	cell-substrate junction	GO:0030055	1.00208e-08	49	SPRY4,AJUBA,AKAP12,HSPA5,FLT1,SHROOM4,HYOU1,LIMD1,FGFR3,ITGA2,HSP90B1,GJA1,SLC9A3R2,VCL,CALR,ENG,GIT1,SDC4,ITGA1,MAP2K1,EHD3,ACTN1,CAPN2,LIMS2,CSRP1,FLNA,HSPB1,PLAU,ARHGAP24,DLC1,PDIA3,SCARF2,PDGFRB,CD59,ACTN4,SLC9A1,L1CAM,STARD8,REXO2,CBL,ITGB1,MYH9,MARCKS,G3BP1,ATAT1,RAB10,VASP,ARPC5L,CAP1
GO:CC	nuclear lumen	GO:0031981	2.09078e-08	321	UPP1,ACOT7,PNMA2,ANKRD37,AJUBA,NR4A3,ONECUT2,ETV4,MASP1,FABP5,SAPCD2,ADAMTS4,MAFF,AQP3,IL7R,SHROOM4,SMAD7,RAPH1,BHLHE40,ANKRD61,WDR77,LIMD1,ATF3,EGLN3,TAF4B,GOT1,TP53TG5,SGK1,SMAD9,PPARD,RRS1,GJA1,CCND1,KLF7,PNO1,MRI1,HSPH1,NIP7,ID1,GAR1,CCDC86,EPOP,ETS1,TEAD4,MSX1,RRP12,NEDD4L,ENG,POLR3G,SUGP2,TSR1,CITED4,CMIP,SPRY1,MCL1,FGF13,WDR46,SRSF1,HIGD1A,RPF2,ATXN2L,UGDH,DPH1,STYX,BCDIN3D,EEF1E1,SPATA13,…
GO:CC	ribonucleoprotein complex	GO:1990904	2.32595e-08	79	ZFP36,LIMD1,RRS1,NIP7,GAR1,PABPC1L,CALR,TSR1,WDR46,SRSF1,MPV17L2,CPSF6,LTV1,LSM11,NOP14,WDR12,SRSF2,NAT10,MAK16,RSL1D1,PWP2,RRP15,KHDC4,NUFIP2,PRPF3,BOP1,HNRNPA3,JMJD6,ACTN4,DDX5,NOL6,IMP4,NOP9,WDR36,SNRPF,SNRPA,SNRPD1,LARP4,WRAP53,PTGES3,MRTO4,MRPL20,G3BP1,SMG5,FTSJ3,FBL,SNRNP40,BYSL,NHP2,PPIL1,EIF2S1,RUVBL2,RBMX,RBM12B,PABPC4L,HNRNPAB,MRPL15,SNRPB,PDCD11,TAF9,SYNCRIP,UTP4,ACTB,EIF4E,SNRPC,SNRPA…
GO:CC	membrane-bounded organelle	GO:0043227	2.71735e-08	781	AKAP1,TUB,PHOSPHO1,ACOX2,TUBA4A,UPP1,IL1RN,CBARP,DNAH2,CCN2,SLC16A3,LOXL4,CCDC151,NTN3,P4HA1,SMPD3,ACOT7,CXCL12,PIWIL3,ZFP36,TINAGL1,RARRES1,PNMA2,MTHFD1L,ANKRD37,GK,AJUBA,FABP3,ACE2,ADAMTS1,NDUFA4L2,DYNC1I1,NR4A3,HSPA5,ONECUT2,ETV4,MASP1,COL8A2,NOS3,FABP5,FLT1,SAPCD2,ADAMTS4,MAFF,CRELD2,AQP3,GAL,BMP6,IL7R,SPATA5,ERO1A,FGF12,SLC2A3,TFRC,GADD45G,SHROOM4,SMAD7,CHST3,RAPH1,SRL,CCN1,ACTA2,HYOU1,BHLHE…
GO:CC	nucleoplasm	GO:0005654	8.70948e-08	298	UPP1,ACOT7,ANKRD37,AJUBA,NR4A3,ONECUT2,ETV4,MASP1,FABP5,SAPCD2,ADAMTS4,MAFF,AQP3,IL7R,SHROOM4,SMAD7,RAPH1,BHLHE40,ANKRD61,WDR77,LIMD1,ATF3,EGLN3,TAF4B,GOT1,SGK1,SMAD9,PPARD,RRS1,GJA1,CCND1,KLF7,PNO1,MRI1,HSPH1,NIP7,ID1,GAR1,CCDC86,EPOP,ETS1,TEAD4,MSX1,NEDD4L,ENG,POLR3G,SUGP2,TSR1,CITED4,CMIP,SPRY1,MCL1,WDR46,SRSF1,HIGD1A,RPF2,ATXN2L,UGDH,DPH1,STYX,BCDIN3D,EEF1E1,SPATA13,SRF,GCH1,CPSF6,SPRED1,LTV1…
GO:CC	nucleolus	GO:0005730	1.31224e-07	94	PNMA2,ETV4,SAPCD2,SMAD7,ATF3,TAF4B,TP53TG5,RRS1,PNO1,MRI1,NIP7,GAR1,CCDC86,RRP12,TSR1,FGF13,WDR46,RPF2,EEF1E1,KDM7A,NOP14,METTL1,WDR12,PODXL,MYBBP1A,ETV6,NAT10,MAK16,MYO1C,ZNF207,GRWD1,RSL1D1,FLNA,PLK3,PWP2,RRP8,GNL3,RBM34,INO80E,SENP5,NOP16,NIFK,BOP1,JMJD6,DDX5,ATXN1,RPS6KA3,PTBP1,ATXN7,REXO2,NOL6,GPRC5B,IMP4,NOP9,WDR36,CIAPIN1,PHF6,KATNBL1,SRSF5,ENDOV,CLEC3B,TXNRD1,MRTO4,LLPH,TIMM13,FTSJ3,FBL,U…
GO:CC	cytosol	GO:0005829	1.4223e-07	369	AKAP1,TUB,PHOSPHO1,ACOX2,TUBA4A,SPRY4,UPP1,CCN2,STAC,ACOT7,ZFP36,MTHFD1L,ANKRD37,GK,AJUBA,FABP3,AKAP12,DYNC1I1,HSPA5,MASP1,NOS3,FABP5,SAPCD2,IL7R,SMAD7,RAPH1,CAVIN4,ACTA2,RAPGEF4,TRAF5,NLRP6,MANF,DISC1,WDR77,ACTG2,PFKL,SLC7A5,LIMD1,ADRA2B,SYT7,EGLN3,AMOTL2,PPP1R14A,SPTB,PDE4C,LDHA,GOT1,PNP,SLC2A1,SGK1,SMAD9,HSP90B1,CCND1,RASGRF2,FABP4,PSMA8,KLF7,PNO1,GLTPD2,BCL2L1,MRI1,HSPH1,NIP7,VCL,TPM2,KANK4,A…
GO:CC	organelle	GO:0043226	4.82463e-07	814	AKAP1,TUB,PHOSPHO1,ACOX2,TUBA4A,UPP1,IL1RN,CBARP,DNAH2,CCN2,SLC16A3,LOXL4,CCDC151,NTN3,P4HA1,SMPD3,ACOT7,CXCL12,PIWIL3,ZFP36,TINAGL1,RARRES1,PNMA2,MTHFD1L,ANKRD37,GK,AJUBA,FABP3,ACE2,AKAP12,ADAMTS1,NDUFA4L2,DYNC1I1,FRMD5,NR4A3,HSPA5,ONECUT2,ETV4,MASP1,COL8A2,NOS3,FABP5,FLT1,SAPCD2,ADAMTS4,MAFF,CRELD2,AQP3,GAL,BMP6,IL7R,SPATA5,ERO1A,FGF12,SLC2A3,TFRC,GADD45G,SHROOM4,SMAD7,CHST3,RAPH1,SRL,CCN1,CAVI…
GO:CC	extracellular exosome	GO:0070062	2.63729e-06	166	TUBA4A,IL1RN,LOXL4,ACOT7,CXCL12,TINAGL1,RARRES1,GK,FABP3,ACE2,HSPA5,FABP5,SLC2A3,TFRC,ACTA2,HYOU1,KCNG2,ATP1B3,ACTG2,PFKL,SLC7A5,ARL8A,CPM,SYT7,LDHA,GOT1,PNP,SLC2A1,ECM1,HSP90B1,TMC8,FABP4,PSMA8,ENPEP,HSPH1,DAAM2,SLC9A3R2,VCL,PABPC1L,CALR,ABHD8,UGGT1,NEDD4L,ATP1A1,ANXA3,ASS1,ALPL,SDC4,UGDH,ENDOD1,TMC6,ITGA1,CLIC1,PLXNA1,PODXL,STK26,ADSS,PDIA6,ACTN1,ENO1,CAPN2,MYO1C,COL4A2,CSRP1,PTPRG,VASN,FLNA,HS…
GO:CC	catalytic complex	GO:1902494	3.80165e-06	120	DNAH2,P4HA1,ZFP36,DYNC1I1,DISC1,WDR77,PFKL,TAF4B,AMHR2,CCND1,PSMA8,GAR1,GNGT2,EPOP,POLR3G,SRSF1,PIGA,PPP1R15A,NUS1,METTL1,PPP1R3D,ENO1,MAT2A,SPCS3,DIS3,ZFAND2A,HSPB1,PIK3C2A,INO80E,NCOR2,TNFAIP1,POLR3E,HNRNPA3,DDX5,PIGC,HDAC7,GTF2H3,STT3A,GCLM,SNRPF,UBE2V2,DET1,SNRPD1,NEDD4,MAP3K7,SOCS4,PSMD14,CCNH,PRMT1,SNRNP40,RNF7,UBE2N,TRMT61B,PSMA5,NHP2,PHC2,PPIL1,PSMD11,PSMD12,PSMD3,TAF13,RUVBL2,RBMX,SINHCA…
GO:CC	nucleus	GO:0005634	5.08467e-06	484	TUB,UPP1,SLC16A3,ACOT7,CXCL12,PIWIL3,ZFP36,PNMA2,ANKRD37,AJUBA,DYNC1I1,NR4A3,HSPA5,ONECUT2,ETV4,MASP1,NOS3,FABP5,SAPCD2,ADAMTS4,MAFF,AQP3,IL7R,FGF12,GADD45G,SHROOM4,SMAD7,RAPH1,BHLHE40,TRIB2,PTPRE,NLRP6,MANF,CSDC2,ANKRD61,DISC1,WDR77,SOX8,LIMD1,FGFR3,ATF3,EGLN3,TAF4B,ITGA2,PDE4C,LDHA,GOT1,TP53TG5,PNP,SLC2A1,SGK1,SMAD9,PPARD,HSP90B1,RRS1,GJA1,CCND1,TMC8,GPR88,FABP4,PSMA8,KLF7,MICAL2,PNO1,BCL2L1,MR…
GO:CC	90S preribosome	GO:0030686	1.46594e-05	11	NOP14,WDR12,RSL1D1,PWP2,BOP1,NOL6,IMP4,NOP9,WDR36,UTP4,UTP6
GO:CC	extracellular membrane-bounded organelle	GO:0065010	2.37351e-05	167	PHOSPHO1,TUBA4A,IL1RN,LOXL4,ACOT7,CXCL12,TINAGL1,RARRES1,GK,FABP3,ACE2,HSPA5,FABP5,SLC2A3,TFRC,ACTA2,HYOU1,KCNG2,ATP1B3,ACTG2,PFKL,SLC7A5,ARL8A,CPM,SYT7,LDHA,GOT1,PNP,SLC2A1,ECM1,HSP90B1,TMC8,FABP4,PSMA8,ENPEP,HSPH1,DAAM2,SLC9A3R2,VCL,PABPC1L,CALR,ABHD8,UGGT1,NEDD4L,ATP1A1,ANXA3,ASS1,ALPL,SDC4,UGDH,ENDOD1,TMC6,ITGA1,CLIC1,PLXNA1,PODXL,STK26,ADSS,PDIA6,ACTN1,ENO1,CAPN2,MYO1C,COL4A2,CSRP1,PTPRG,VAS…
GO:CC	extracellular organelle	GO:0043230	2.37351e-05	167	PHOSPHO1,TUBA4A,IL1RN,LOXL4,ACOT7,CXCL12,TINAGL1,RARRES1,GK,FABP3,ACE2,HSPA5,FABP5,SLC2A3,TFRC,ACTA2,HYOU1,KCNG2,ATP1B3,ACTG2,PFKL,SLC7A5,ARL8A,CPM,SYT7,LDHA,GOT1,PNP,SLC2A1,ECM1,HSP90B1,TMC8,FABP4,PSMA8,ENPEP,HSPH1,DAAM2,SLC9A3R2,VCL,PABPC1L,CALR,ABHD8,UGGT1,NEDD4L,ATP1A1,ANXA3,ASS1,ALPL,SDC4,UGDH,ENDOD1,TMC6,ITGA1,CLIC1,PLXNA1,PODXL,STK26,ADSS,PDIA6,ACTN1,ENO1,CAPN2,MYO1C,COL4A2,CSRP1,PTPRG,VAS…
GO:CC	extracellular vesicle	GO:1903561	3.70075e-05	166	TUBA4A,IL1RN,LOXL4,ACOT7,CXCL12,TINAGL1,RARRES1,GK,FABP3,ACE2,HSPA5,FABP5,SLC2A3,TFRC,ACTA2,HYOU1,KCNG2,ATP1B3,ACTG2,PFKL,SLC7A5,ARL8A,CPM,SYT7,LDHA,GOT1,PNP,SLC2A1,ECM1,HSP90B1,TMC8,FABP4,PSMA8,ENPEP,HSPH1,DAAM2,SLC9A3R2,VCL,PABPC1L,CALR,ABHD8,UGGT1,NEDD4L,ATP1A1,ANXA3,ASS1,ALPL,SDC4,UGDH,ENDOD1,TMC6,ITGA1,CLIC1,PLXNA1,PODXL,STK26,ADSS,PDIA6,ACTN1,ENO1,CAPN2,MYO1C,COL4A2,CSRP1,PTPRG,VASN,FLNA,HS…
GO:CC	melanosome	GO:0042470	4.57079e-05	18	HSPA5,TFRC,ATP1B3,SLC2A1,HSP90B1,ATP1A1,SYTL2,PDIA4,PDIA6,TMEM33,PDIA3,CALU,CANX,STOM,ITGB1,HSP90AA1,PRDX1,TMED10
GO:CC	pigment granule	GO:0048770	4.57079e-05	18	HSPA5,TFRC,ATP1B3,SLC2A1,HSP90B1,ATP1A1,SYTL2,PDIA4,PDIA6,TMEM33,PDIA3,CALU,CANX,STOM,ITGB1,HSP90AA1,PRDX1,TMED10
GO:CC	protein-containing complex	GO:0032991	5.46081e-05	362	CACNA1G,SLC6A6,NTNG2,DNAH2,LOXL4,P4HA1,ZFP36,AJUBA,NDUFA4L2,DYNC1I1,NR4A3,HSPA5,COL8A2,FLT1,TFRC,GJA9,SMAD7,ACTA2,HYOU1,TRAF5,NLRP6,KCNG2,ATP1B3,DISC1,WDR77,KIF26B,ACTG2,PFKL,SLC7A5,SOX8,LIMD1,FGFR3,ATF3,TAF4B,ITGA2,SPTB,AMHR2,SMAD9,HSP90B1,RRS1,GJA1,CCND1,SERPINH1,PSMA8,SLC51B,BCL2L1,HSPH1,NIP7,GAR1,GNGT2,VCL,TPM2,EPOP,PABPC1L,KDR,TEAD4,CALR,UGGT1,ENG,POLR3G,KCNAB3,TSR1,ATP1A1,PLXNA2,MCL1,GRIK3,…
GO:CC	cell junction	GO:0030054	6.68622e-05	94	HCRTR1,CACNA1G,SPRY4,SLC6A6,NTNG2,CBARP,SLC16A3,AJUBA,AKAP12,FRMD5,HSPA5,FABP5,FLT1,SAPCD2,AQP3,FGF12,GJA9,SHROOM4,SMAD7,HYOU1,RAPGEF4,MDGA1,DISC1,VEGFA,ARL8A,LIMD1,FGFR3,SYT7,AMOTL2,SLC12A4,ITGA2,GOT1,SDK2,SLC18A2,SLC2A1,HSP90B1,GJA1,CCND1,BCL2L1,SLC9A3R2,VCL,ARHGEF9,KDR,CALR,ENG,ATP1A1,ADORA2A,GRIK3,GIT1,FGF13,PMP22,CABP1,SDC4,SYNGAP1,DPH1,SNTA1,TMEM47,PRRT2,LRFN4,ITGA1,PSD3,CAMK1,PODXL,MAP2K1,…
GO:CC	telomerase holoenzyme complex	GO:0005697	7.72653e-05	9	GAR1,LSM11,NAT10,WRAP53,PTGES3,SMG5,NHP2,SNRPB,SNRPD3
GO:CC	preribosome, small subunit precursor	GO:0030688	9.78741e-05	8	TSR1,LTV1,NOP14,NOP9,FTSJ3,BYSL,NOB1,RIOK2
GO:CC	endoplasmic reticulum protein-containing complex	GO:0140534	0.000114878	22	P4HA1,HSPA5,HYOU1,HSP90B1,CALR,PIGA,SDF2L1,PDIA6,SPCS3,PDIA3,SRPRB,PIGC,EMC4,STT3A,MMGT1,ABCB9,EMC8,STT3B,SEC63,UBXN7,ERN1,SPTSSA
GO:CC	cell periphery	GO:0071944	0.000137674	87	TUB,PHOSPHO1,HCRTR1,CACNA1G,GPR17,SPRY4,SLC6A6,IL1RN,NTNG2,CBARP,TRPM3,SLC16A5,NMUR1,CCN2,RHBDL2,SLC16A3,NTN3,CNKSR3,SMPD3,STAC,CXCL12,TINAGL1,AJUBA,ACE2,AKAP12,ADAMTS1,GPR4,HSPA5,COL8A2,NOS3,FABP5,FLT1,SAPCD2,ADAMTS4,AQP3,IL7R,FFAR3,SLC2A3,TFRC,TLCD2,GJA9,SHROOM4,SMAD7,RAPH1,CCN1,CAVIN4,ABCC3,PTPRE,RAPGEF4,TRAF5,NLRP6,AGTR1,KCNG2,RGS16,ATP1B3,CYSLTR2,PCDH18,MDGA1,EMP1,ACTG2,SLC7A5,PTGDR2,VEGFA,A…
GO:CC	methylosome	GO:0034709	0.000138999	7	WDR77,SNRPF,SNRPD1,PRMT1,SNRPB,SNRPD3,ERH
GO:CC	endoplasmic reticulum chaperone complex	GO:0034663	0.000200281	5	HSPA5,HYOU1,HSP90B1,SDF2L1,PDIA6
GO:CC	intrinsic component of plasma membrane	GO:0031226	0.000404602	36	HCRTR1,CACNA1G,GPR17,SLC6A6,NTNG2,TRPM3,SLC16A5,NMUR1,SLC16A3,GPR4,FLT1,FFAR3,SLC2A3,TFRC,TRAF5,AGTR1,KCNG2,ATP1B3,CYSLTR2,PCDH18,MDGA1,PTGDR2,FGFR3,ADRA2B,SYT7,SLC12A4,ITGA2,SPTB,SLC10A1,SLC18A2,AMHR2,SLC2A1,GJA1,TMC8,CYSLTR1,GPR88
GO:CC	endoplasmic reticulum membrane	GO:0005789	0.000411587	93	HSPA5,ERO1A,SRL,FADS3,SLC35B4,SGK1,HSP90B1,GJA1,TMC8,RASGRF2,TMEM50B,CALR,SAR1B,MLEC,PIGA,TMC6,PPP1R15A,NUS1,ERLIN1,FICD,GOSR2,SDF2L1,SLC33A1,PDIA6,SPCS3,LPCAT3,AHCYL1,ERP44,VTI1A,PIGW,ERGIC1,TMEM33,EDEM1,PDIA3,TRAM2,DNAJB14,CD59,XBP1,CALU,SLC9A1,PCYT2,SRPRB,LRRC8C,ATP11A,PIGC,MOSPD2,EMC4,CANX,RDH11,STT3A,LRRC59,ALG5,RNF121,CERS2,MMGT1,TMED5,SELENOT,PIGX,RAB10,ABCB9,SLC35B1,TMED10,PLPP3,CARD19,EM…
GO:CC	catalytic step 2 spliceosome	GO:0071013	0.00045281	17	SRSF1,HNRNPA3,DDX5,SNRPF,SNRPD1,SNRNP40,PPIL1,RBMX,SNRPB,SYNCRIP,SNRPA1,SF3A2,SNRPD3,U2AF1,PRPF4B,HNRNPA2B1,SF3B6
GO:CC	preribosome, large subunit precursor	GO:0030687	0.000489849	8	RRS1,NIP7,WDR12,MAK16,RRP15,BOP1,MRTO4,FTSJ3
GO:CC	endoplasmic reticulum subcompartment	GO:0098827	0.000497308	93	HSPA5,ERO1A,SRL,FADS3,SLC35B4,SGK1,HSP90B1,GJA1,TMC8,RASGRF2,TMEM50B,CALR,SAR1B,MLEC,PIGA,TMC6,PPP1R15A,NUS1,ERLIN1,FICD,GOSR2,SDF2L1,SLC33A1,PDIA6,SPCS3,LPCAT3,AHCYL1,ERP44,VTI1A,PIGW,ERGIC1,TMEM33,EDEM1,PDIA3,TRAM2,DNAJB14,CD59,XBP1,CALU,SLC9A1,PCYT2,SRPRB,LRRC8C,ATP11A,PIGC,MOSPD2,EMC4,CANX,RDH11,STT3A,LRRC59,ALG5,RNF121,CERS2,MMGT1,TMED5,SELENOT,PIGX,RAB10,ABCB9,SLC35B1,TMED10,PLPP3,CARD19,EM…
GO:CC	nuclear outer membrane-endoplasmic reticulum membrane network	GO:0042175	0.000545575	95	HSPA5,ERO1A,SRL,FADS3,SLC35B4,SGK1,HSP90B1,GJA1,TMC8,RASGRF2,TMEM50B,CALR,SAR1B,MLEC,PIGA,TMC6,PPP1R15A,NUS1,ERLIN1,FICD,GOSR2,SDF2L1,SLC33A1,PDIA6,SPCS3,LPCAT3,AHCYL1,ERP44,VTI1A,PIGW,ERGIC1,TMEM33,EDEM1,PDIA3,TRAM2,DNAJB14,CD59,XBP1,CALU,SLC9A1,PCYT2,SRPRB,LRRC8C,ATP11A,PIGC,MOSPD2,EMC4,CANX,RDH11,STT3A,LRRC59,ALG5,RNF121,CERS2,MMGT1,TMED5,SELENOT,PIGX,RAB10,ABCB9,SLC35B1,TMED10,PLPP3,CARD19,EM…
GO:CC	organelle subcompartment	GO:0031984	0.000555722	137	SMPD3,HSPA5,NOS3,ERO1A,CHST3,SRL,FADS3,HS3ST2,SLC35B4,A4GALT,SLC2A1,SGK1,HSP90B1,GJA1,TMC8,RASGRF2,XYLT1,TMEM50B,ARL5A,CALR,SAR1B,SLC35A3,CABP1,MLEC,ATP7B,PIGA,TMC6,PPP1R15A,NUS1,ERLIN1,FICD,CHSY1,B3GALT6,GOSR2,SDF2L1,STK26,SLC33A1,PDIA6,LITAF,SPCS3,FLNA,PLK3,LPCAT3,PIK3C2A,GSAP,AHCYL1,ERP44,VTI1A,PIGW,ERGIC1,TMEM33,EDEM1,PDIA3,TRAM2,DNAJB14,CD59,XBP1,CALU,RNF24,SLC9A1,PCYT2,SRPRB,LRRC8C,MGAT4A,A…
GO:CC	organelle membrane	GO:0031090	0.00075605	249	AKAP1,CBARP,SLC16A3,SMPD3,GK,ACE2,NDUFA4L2,HSPA5,NOS3,FABP5,IL7R,ERO1A,SLC2A3,TFRC,CHST3,SRL,NLRP6,CPT1A,SLC7A5,RDH13,ARL8A,SYT7,SLC12A4,FADS3,HS3ST2,SLC35B4,A4GALT,SLC18A2,SLC2A1,SGK1,HSP90B1,GJA1,CCND1,TMC8,RASGRF2,SLC17A9,XYLT1,BCL2L1,ENPEP,NDUFAF4,TMEM50B,RRP12,LNPEP,CALR,TIMM8A,ATP1A1,MCL1,SAR1B,SLC35A3,ANXA3,RILP,ASS1,HIGD1A,CABP1,MLEC,ATP7B,PIGA,PRRT2,TMC6,PPP1R15A,NUS1,THBD,MPV17L2,GCH1,C…
GO:CC	sarcoplasmic reticulum lumen	GO:0033018	0.000883451	5	SRL,MANF,HSP90B1,CALR,CALU
GO:CC	integral component of plasma membrane	GO:0005887	0.00129651	52	HCRTR1,CACNA1G,GPR17,SLC6A6,TRPM3,SLC16A5,NMUR1,SLC16A3,GPR4,FLT1,FFAR3,SLC2A3,TFRC,TRAF5,AGTR1,KCNG2,ATP1B3,CYSLTR2,PCDH18,PTGDR2,FGFR3,ADRA2B,SYT7,SLC12A4,ITGA2,SLC10A1,SLC18A2,AMHR2,SLC2A1,GJA1,TMC8,CYSLTR1,GPR88,ENPEP,KDR,P2RY2,LNPEP,KCNAB3,ATP1A1,PLXNA2,ADORA2A,GRIK3,SDC4,ATP7B,PRRT2,TMC6,THBD,LRFN4,ITGA1,KCNK4,MMP16,PLXNA1
GO:CC	endomembrane system	GO:0012505	0.00136865	234	CBARP,CCN2,SLC16A3,NTN3,P4HA1,SMPD3,AJUBA,ACE2,DYNC1I1,HSPA5,COL8A2,NOS3,FABP5,FLT1,CRELD2,GAL,ERO1A,SLC2A3,TFRC,CHST3,SRL,CCN1,HYOU1,NLRP6,MANF,MDGA1,DISC1,WDR77,PFKL,VEGFA,ARL8A,FGFR3,SYT7,AMOTL2,FADS3,CNMD,HS3ST2,SLC35B4,A4GALT,PNP,SLC18A2,SLC2A1,SGK1,ECM1,HSP90B1,GJA1,CCND1,TMC8,RASGRF2,SERPINH1,SLC17A9,XYLT1,BCL2L1,ID1,SLC9A3R2,VCL,TMEM50B,KDR,ARL5A,FEZ1,RRP12,LNPEP,CALR,UGGT1,NEDD4L,TIMP3,A…
GO:CC	cell-cell junction	GO:0005911	0.00225422	40	AJUBA,FRMD5,SAPCD2,AQP3,GJA9,SHROOM4,SMAD7,VEGFA,LIMD1,AMOTL2,SLC2A1,GJA1,CCND1,VCL,ATP1A1,FGF13,PMP22,TMEM47,PODXL,VEZT,ACTN1,LIMS2,FLNA,FZD4,CLIC4,ARHGAP24,ADAM15,FRMD4A,SYNPO,SLC9A1,LIN7C,TMEM204,ITGB1,MYH9,PKP4,CDC42EP4,YBX3,RAB10,VASP,PLPP3
GO:CC	basal part of cell	GO:0045178	0.00254484	12	SLC6A6,SLC16A3,AQP3,TFRC,SHROOM4,ABCC3,ATP1B3,SLC7A5,ITGA2,SLC10A1,SLC2A1,SLC51B
GO:CC	cytoplasmic stress granule	GO:0010494	0.00271276	15	ZFP36,PABPC1L,ATXN2L,TARDBP,NUFIP2,LARP4,ENDOV,G3BP1,EIF2S1,PABPC4L,RC3H2,KHSRP,EIF4E,EIF4G1,YTHDF1
GO:CC	nuclear protein-containing complex	GO:0140513	0.00308639	94	HSPA5,SMAD7,TAF4B,SMAD9,GAR1,EPOP,POLR3G,SRSF1,NUP210L,CPSF6,LSM11,NOP14,WDR12,SRSF2,NAT10,INTS2,MYO1C,DIS3,FLNA,PWP2,RRP8,NABP1,INO80E,KHDC4,NCOR2,E2F4,PRPF3,POLR3E,SMAD6,BOP1,HNRNPA3,DDX5,NOL6,HDAC7,GTF2H3,IMP4,WDR36,SNRPF,SNRPA,MYH9,SNRPD1,INTS1,MAP3K7,WRAP53,NUP93,PTGES3,SMG5,BUB3,TCF7L1,CCNH,CPSF1,SNRNP40,RNF7,ATF4,NHP2,PHC2,PPIL1,PSMD12,TAF13,RUVBL2,RBMX,SINHCAF,STAT3,RAD51C,HNRNPAB,GEMIN5,…
GO:CC	small-subunit processome	GO:0032040	0.00522324	10	WDR46,NOP14,PWP2,NOL6,IMP4,WDR36,FBL,PDCD11,UTP4,UTP6
GO:CC	extracellular matrix	GO:0031012	0.00584993	22	PHOSPHO1,NTNG2,CCN2,NTN3,CXCL12,TINAGL1,ADAMTS1,COL8A2,ADAMTS4,CCN1,VEGFA,ECM1,HSP90B1,SERPINH1,TMEFF1,TIMP4,ADAMTS12,CALR,TIMP3,HAPLN3,LAMC3,ALPL
GO:CC	external encapsulating structure	GO:0030312	0.00601209	22	PHOSPHO1,NTNG2,CCN2,NTN3,CXCL12,TINAGL1,ADAMTS1,COL8A2,ADAMTS4,CCN1,VEGFA,ECM1,HSP90B1,SERPINH1,TMEFF1,TIMP4,ADAMTS12,CALR,TIMP3,HAPLN3,LAMC3,ALPL
GO:CC	endoplasmic reticulum lumen	GO:0005788	0.00620666	24	P4HA1,ACE2,HSPA5,COL8A2,ERO1A,SRL,CCN1,HYOU1,MANF,HSP90B1,SERPINH1,CALR,UGGT1,PDIA4,SDF2L1,DNAJB11,PDIA6,COL4A2,COL4A1,ERP44,PDIA3,CALU,MGAT4A,CANX
GO:CC	basal plasma membrane	GO:0009925	0.00731131	11	SLC6A6,SLC16A3,AQP3,TFRC,SHROOM4,ABCC3,ATP1B3,SLC7A5,SLC10A1,SLC2A1,SLC51B
GO:CC	plasma membrane	GO:0005886	0.00931914	76	TUB,HCRTR1,CACNA1G,GPR17,SPRY4,SLC6A6,IL1RN,NTNG2,CBARP,TRPM3,SLC16A5,NMUR1,CCN2,RHBDL2,SLC16A3,CNKSR3,SMPD3,STAC,CXCL12,AJUBA,ACE2,AKAP12,GPR4,HSPA5,NOS3,FABP5,FLT1,SAPCD2,AQP3,IL7R,FFAR3,SLC2A3,TFRC,TLCD2,GJA9,SHROOM4,SMAD7,RAPH1,CAVIN4,ABCC3,PTPRE,RAPGEF4,TRAF5,NLRP6,AGTR1,KCNG2,RGS16,ATP1B3,CYSLTR2,PCDH18,MDGA1,EMP1,SLC7A5,PTGDR2,ARL8A,CPM,LIMD1,FGFR3,ADRA2B,SYT7,AMOTL2,SLC12A4,ITGA2,SPTB,SLC…
GO:CC	adherens junction	GO:0005912	0.0100395	19	AJUBA,FRMD5,SHROOM4,SMAD7,VEGFA,LIMD1,VCL,TMEM47,VEZT,ARHGAP24,ADAM15,FRMD4A,LIN7C,TMEM204,MYH9,PKP4,CDC42EP4,RAB10,PLPP3
GO:CC	interchromatin granule	GO:0035061	0.0113826	4	CPSF6,TARDBP,SRSF2,SMC5
GO:CC	basolateral plasma membrane	GO:0016323	0.0161611	10	SLC6A6,SLC16A3,AQP3,TFRC,ABCC3,ATP1B3,SLC7A5,SLC10A1,SLC2A1,SLC51B
GO:CC	endocytic vesicle lumen	GO:0071682	0.0196632	6	HYOU1,HSP90B1,HSPH1,CALR,HGS,HSP90AA1
GO:CC	methyltransferase complex	GO:0034708	0.0226717	16	WDR77,EPOP,METTL1,SNRPF,SNRPD1,PRMT1,TRMT61B,RUVBL2,SNRPB,METTL3,KMT2D,TAF9,AEBP2,SNRPD3,ERH,RAMAC
GO:CC	vesicle	GO:0031982	0.0262638	205	TUBA4A,IL1RN,CBARP,LOXL4,ACOT7,CXCL12,TINAGL1,RARRES1,GK,FABP3,ACE2,ADAMTS1,DYNC1I1,HSPA5,NOS3,FABP5,FLT1,GAL,BMP6,IL7R,SLC2A3,TFRC,ACTA2,HYOU1,KCNG2,ATP1B3,DISC1,ACTG2,PFKL,SLC7A5,VEGFA,ARL8A,CPM,FGFR3,SYT7,AMOTL2,LDHA,GOT1,PNP,SLC18A2,SLC2A1,ECM1,HSP90B1,GJA1,TMC8,FABP4,PSMA8,SLC17A9,BCL2L1,ENPEP,HSPH1,DAAM2,SLC9A3R2,VCL,PABPC1L,KDR,LNPEP,CALR,ABHD8,UGGT1,NEDD4L,TIMP3,ATP1A1,SAR1B,ANXA3,SYTL2,R…
GO:CC	endoplasmic reticulum	GO:0005783	0.0284961	142	P4HA1,ACE2,HSPA5,COL8A2,CRELD2,ERO1A,SRL,CCN1,HYOU1,MANF,DISC1,FGFR3,FADS3,SLC35B4,SGK1,HSP90B1,GJA1,TMC8,RASGRF2,SERPINH1,BCL2L1,TMEM50B,KDR,CALR,UGGT1,ATP1A1,SAR1B,ASS1,PDIA4,CCDC134,MLEC,PIGA,TMC6,PPP1R15A,NUS1,ERLIN1,FICD,MAP2K1,GOSR2,SDF2L1,DNAJB11,SLC33A1,TMEM64,PDIA6,CAPN2,COL4A2,SPCS3,COL4A1,LPCAT3,UFM1,AHCYL1,ERP44,VTI1A,PIGW,ERGIC1,VWF,TMEM33,EDEM1,PDIA3,TRAM2,DNAJB14,CD59,XBP1,CALU,SLC…
GO:CC	Cajal body	GO:0015030	0.029372	11	GAR1,PRPF3,WRAP53,FBL,NHP2,EAF1,ZPR1,ZNF473,SNRPC,U2AF1,HNRNPA2B1
GO:CC	extracellular region	GO:0005576	0.029436	94	APLN,CCL1,TUB,PHOSPHO1,TUBA4A,IL1RN,NTNG2,CCN2,LOXL4,NTN3,SMPD3,ACOT7,CXCL12,TINAGL1,RARRES1,GK,FABP3,ACE2,WFDC1,ADAMTS1,HSPA5,MASP1,COL8A2,FABP5,FLT1,ADAMTS4,CRELD2,GAL,BMP6,IL7R,FGF12,SLC2A3,TFRC,THEM6,CCN1,ACTA2,HYOU1,KCNG2,MANF,ATP1B3,MDGA1,ACTG2,PFKL,SLC7A5,VEGFA,ARL8A,CPM,FGFR3,SYT7,CNMD,PDE4C,DMKN,LDHA,GOT1,PNP,CPXM2,SLC2A1,ECM1,HSP90B1,TMC8,SERPINH1,FABP4,PSMA8,XYLT1,TIMP4,ENPEP,HSPH1,DAA…
GO:CC	collagen-containing extracellular matrix	GO:0062023	0.0311921	8	NTNG2,CCN2,NTN3,CXCL12,TINAGL1,ADAMTS1,COL8A2,ADAMTS4
GO:CC	bounding membrane of organelle	GO:0098588	0.0334754	152	AKAP1,CBARP,SMPD3,GK,ACE2,NOS3,FABP5,IL7R,SLC2A3,TFRC,CHST3,SRL,CPT1A,SLC7A5,ARL8A,SYT7,SLC12A4,HS3ST2,SLC35B4,A4GALT,SLC18A2,SLC2A1,GJA1,SLC17A9,XYLT1,BCL2L1,ENPEP,TMEM50B,LNPEP,CALR,MCL1,SAR1B,SLC35A3,ANXA3,RILP,ASS1,CABP1,MLEC,ATP7B,PRRT2,TMC6,PPP1R15A,THBD,CHSY1,B3GALT6,GOSR2,STK26,SLC33A1,EHD3,LITAF,CD68,VASN,PHACTR2,FZD4,HGS,TOMM40,RNF152,STK10,PLAU,VTI1A,ERGIC1,PDIA3,CD59,RNF24,SLC30A4,TOM…
GO:CC	cytoplasmic ribonucleoprotein granule	GO:0036464	0.0416483	27	ZFP36,AJUBA,DYNC1I1,LIMD1,PABPC1L,ATXN2L,TARDBP,SHB,NUFIP2,UHMK1,LARP4,ENDOV,G3BP1,EIF2S1,PABPC4L,RC3H2,POLR2D,CNOT9,ACTB,KHSRP,EIF4E,EIF4G1,IQGAP1,DHX9,SAMD4B,YTHDF1,DIS3L2
GO:CC	ribonucleoprotein granule	GO:0035770	0.0449107	28	ZFP36,AJUBA,DYNC1I1,LIMD1,PABPC1L,ATXN2L,TARDBP,SHB,NUFIP2,HNRNPA3,UHMK1,LARP4,ENDOV,G3BP1,EIF2S1,PABPC4L,RC3H2,POLR2D,CNOT9,ACTB,KHSRP,EIF4E,EIF4G1,IQGAP1,DHX9,SAMD4B,YTHDF1,DIS3L2
REAC	Metabolism of RNA	REAC:R-HSA-8953854	0.0170345	93	ZFP36,WDR77,PSMA8,PNO1,NIP7,GAR1,TSR1,WDR46,SRSF1,NSUN6,NT5C3B,LTV1,LSM11,NOP14,METTL1,WDR12,SRSF2,NAT10,PUS7,DIS3,HSPB1,PWP2,GNL3,PRPF3,BOP1,HNRNPA3,DDX5,PTBP1,EIF4A1,NOL6,GTF2H3,IMP4,WDR36,SNRPF,FTSJ1,SNRPA,GSPT1,SNRPD1,SRSF5,NUP93,SMG5,RNGTT,PSMD14,CCNH,FTSJ3,CPSF1,FBL,SNRNP40,TRMT61B,CSTF3,PSMA5,BYSL,NHP2,PPIL1,PSMD11,PSMD12,PSMD3,RBMX,PSMC4,GEMIN5,SNRPB,PDCD11,METTL3,WDR43,POLR2D,CNOT9,ZNF47…
REAC	Leukotriene receptors	REAC:R-HSA-391906	0.0181063	3	GPR17,CYSLTR2,CYSLTR1
REAC	rRNA modification in the nucleus and cytosol	REAC:R-HSA-6790901	0.0200452	16	PNO1,GAR1,WDR46,NOP14,NAT10,PWP2,NOL6,IMP4,WDR36,FBL,NHP2,PDCD11,WDR43,UTP4,TRMT112,UTP6
REAC	Eicosanoid ligand-binding receptors	REAC:R-HSA-391903	0.0341144	4	GPR17,CYSLTR2,PTGDR2,CYSLTR1

## Sheet: TH cold UP
source	term_name	term_id	FDR	intersection_size	intersections
GO:MF	extracellular matrix structural constituent	GO:0005201	2.19926e-07	20	COL1A2,COL1A1,COL23A1,COL3A1,LUM,FMOD,MXRA5,DCN,PRELP,COL16A1,MFAP4,COL24A1,COL4A6,SRPX,ABI3BP,AGRN,COL7A1,OGN,COL4A5,NPNT
GO:MF	extracellular matrix structural constituent conferring tensile strength	GO:0030020	1.49485e-05	9	COL1A2,COL1A1,COL23A1,COL3A1,COL16A1,COL24A1,COL4A6,COL7A1,COL4A5
GO:MF	integrin binding	GO:0005178	0.000375166	14	ISG15,COL3A1,FAP,COL16A1,ADAM23,ITGB2,IGF1,JAML,THY1,PTN,ADAM11,ECM2,ITGAX,NPNT
GO:MF	platelet-derived growth factor binding	GO:0048407	0.00095094	4	COL1A2,COL1A1,COL3A1,PDGFRA
GO:MF	immune receptor activity	GO:0140375	0.000969033	11	C3AR1,CD74,XCR1,CD200R1,ACKR4,CCR5,PIGR,C5AR2,C5AR1,CX3CR1,FCER1G
GO:MF	chondroitin sulfate binding	GO:0035374	0.0017029	4	MDK,RTN4RL1,AGRN,PTN
GO:MF	glycosaminoglycan binding	GO:0005539	0.0017029	15	CXCL10,NDNF,NLRP3,DCN,LIPC,PRELP,MDK,RTN4RL1,ADA2,CCDC80,CRISPLD2,ABI3BP,AGRN,PTN,ECM2
GO:MF	extracellular matrix structural constituent conferring compression resistance	GO:0030021	0.00281698	4	LUM,FMOD,DCN,PRELP
GO:MF	heparin binding	GO:0008201	0.00285849	12	CXCL10,NDNF,LIPC,PRELP,MDK,RTN4RL1,ADA2,CCDC80,CRISPLD2,ABI3BP,PTN,ECM2
GO:MF	ATP-dependent microtubule motor activity	GO:1990939	0.00362376	6	KIF4A,KIF18B,CENPE,KIF15,KIFC1,KIF20A
GO:MF	signaling receptor activity	GO:0038023	0.00364869	44	C3AR1,FCGR3A,CD2,ABCC8,CD74,GPBAR1,XCR1,MILR1,PDGFRL,CD200R1,PAQR5,NFAM1,ROBO2,MAP2K6,ACKR4,FOLR2,CLEC7A,CCR5,PIGR,GHSR,FCGR1A,NTRK2,CD86,RTN4RL1,C5AR2,CSF1R,SLAMF8,PDGFRA,C5AR1,IGSF6,NGFR,HPGD,P2RY13,ITGB2,BTK,CX3CR1,GPR34,KISS1R,AGER,CLEC4A,FCER1G,EIF2AK2,COLEC12,OPRL1
GO:MF	flavonoid 3'-monooxygenase activity	GO:0016711	0.00364869	1	CYP1A1
GO:MF	molecular transducer activity	GO:0060089	0.00364869	44	C3AR1,FCGR3A,CD2,ABCC8,CD74,GPBAR1,XCR1,MILR1,PDGFRL,CD200R1,PAQR5,NFAM1,ROBO2,MAP2K6,ACKR4,FOLR2,CLEC7A,CCR5,PIGR,GHSR,FCGR1A,NTRK2,CD86,RTN4RL1,C5AR2,CSF1R,SLAMF8,PDGFRA,C5AR1,IGSF6,NGFR,HPGD,P2RY13,ITGB2,BTK,CX3CR1,GPR34,KISS1R,AGER,CLEC4A,FCER1G,EIF2AK2,COLEC12,OPRL1
GO:MF	immunoglobulin receptor activity	GO:0019763	0.00412284	3	CD200R1,PIGR,FCER1G
GO:MF	microtubule motor activity	GO:0003777	0.00452869	6	KIF4A,KIF18B,CENPE,KIF15,KIFC1,KIF20A
GO:MF	carbohydrate derivative binding	GO:0097367	0.00476637	45	CXCL10,MX1,AURKB,PCK1,CD22,KIF4A,MKI67,KIF18B,ABCC8,DDX58,NAIP,IFI44L,CENPE,BUB1,UBE2C,TOP2A,NDNF,SIGLEC11,DHX58,KIF15,CIITA,AK5,ABCA6,CD200R1,NLRP3,DCN,CIT,LIPC,NLRP1,MAP2K6,PRELP,KIFC1,MDK,ITPKA,ATP8B3,NTRK2,RTN4RL1,UBA7,RAB3B,KIF20A,CSF1R,MFAP4,PDGFRA,WNK4,ADA2
GO:MF	fibronectin binding	GO:0001968	0.00527033	5	MYOC,CCDC80,LOXL3,IGFBP6,CTSS
GO:MF	glycine N-benzoyltransferase activity	GO:0047962	0.00527033	1	GLYAT
GO:MF	complement component C5a receptor activity	GO:0004878	0.00569946	2	C5AR2,C5AR1
GO:MF	ATPase	GO:0016887	0.00623696	24	KIF4A,KIF18B,ABCC8,DDX58,CENPE,TOP2A,DHX58,KIF15,RNF213,ABCA6,ZGRF1,NLRP1,KIFC1,ATP8B3,KIF20A,ORC1,DDX4,ACSM3,RAD54L,CHTF18,ATP8B4,ABCB1,POLQ,ABCG2
GO:MF	vitamin D 24-hydroxylase activity	GO:0070576	0.00677614	1	CYP1A1
GO:MF	complement receptor activity	GO:0004875	0.00798475	3	C3AR1,C5AR2,C5AR1
GO:MF	immunoglobulin binding	GO:0019865	0.00798475	2	FCGR3A,CD22
GO:MF	CD4 receptor binding	GO:0042609	0.00849546	2	CD22,CD74
GO:MF	protein-containing complex binding	GO:0044877	0.00859691	41	ISG15,FCGR3A,CD22,CDCA5,IQGAP3,CD74,COL3A1,CENPF,LUM,RBP4,MMP9,CIITA,CDC20,AIF1,NCKAP1L,DCN,LIPC,DLGAP1,SCIN,FAP,COL16A1,CORO2A,ALOX5AP,FCGR1A,ADAM23,PDGFRA,ITGB2,IGF1,JAML,ABI3BP,AGER,FCER1G,COLEC12,THY1,PTN,ADAM11,SORL1,ECM2,CTSS,CDKN1C,ITGAX
GO:MF	C-C chemokine receptor activity	GO:0016493	0.00859691	4	XCR1,ACKR4,CCR5,CX3CR1
GO:MF	estrogen 2-hydroxylase activity	GO:0101021	0.00878388	1	CYP1A1
GO:MF	C-C chemokine binding	GO:0019957	0.00947643	4	XCR1,ACKR4,CCR5,CX3CR1
GO:MF	cargo receptor activity	GO:0038024	0.00992679	7	ACKR4,FOLR2,ITGB2,LOXL3,AGER,COLEC12,SORL1
GO:MF	low-density lipoprotein particle binding	GO:0030169	0.0101162	4	LIPC,COLEC12,SORL1,PLTP
GO:MF	platelet-derived growth factor-activated receptor activity	GO:0005017	0.0101162	2	PDGFRL,PDGFRA
GO:MF	hydroperoxy icosatetraenoate dehydratase activity	GO:0106256	0.0101162	1	CYP1A1
GO:MF	IgG binding	GO:0019864	0.0101162	3	FCGR3A,FCGR1A,FCER1G
GO:MF	chemokine receptor activity	GO:0004950	0.0104382	4	XCR1,ACKR4,CCR5,CX3CR1
GO:MF	G protein-coupled chemoattractant receptor activity	GO:0001637	0.0104382	4	XCR1,ACKR4,CCR5,CX3CR1
GO:MF	estrogen 16-alpha-hydroxylase activity	GO:0101020	0.0105407	1	CYP1A1
GO:MF	metallodipeptidase activity	GO:0070573	0.0118745	2	DPEP3,DPEP2
GO:MF	glycine N-acyltransferase activity	GO:0047961	0.0121623	1	GLYAT
GO:MF	oxidoreductase activity, acting on diphenols and related substances as donors	GO:0016679	0.0121623	1	CYP1A1
GO:MF	sulfur compound binding	GO:1901681	0.0126978	13	CXCL10,NDNF,LIPC,PRELP,MDK,RTN4RL1,ADA2,CCDC80,CRISPLD2,ABI3BP,AGRN,PTN,ECM2
GO:MF	complement component C3a receptor activity	GO:0004876	0.0138828	1	C3AR1
GO:MF	transmembrane signaling receptor activity	GO:0004888	0.014079	36	C3AR1,FCGR3A,ABCC8,CD74,GPBAR1,XCR1,MILR1,PDGFRL,CD200R1,NFAM1,ROBO2,MAP2K6,ACKR4,CCR5,PIGR,GHSR,FCGR1A,NTRK2,C5AR2,CSF1R,PDGFRA,C5AR1,IGSF6,NGFR,HPGD,P2RY13,ITGB2,BTK,CX3CR1,GPR34,KISS1R,AGER,CLEC4A,FCER1G,EIF2AK2,OPRL1
GO:MF	opsonin receptor activity	GO:0001847	0.01489	2	C5AR2,C5AR1
GO:MF	protein serine kinase activity (using GTP as donor)	GO:0106264	0.015811	1	PCK1
GO:MF	CXCR3 chemokine receptor binding	GO:0048248	0.015811	1	CXCL10
GO:MF	chemokine binding	GO:0019956	0.0201584	4	XCR1,ACKR4,CCR5,CX3CR1
GO:MF	arachidonic acid monooxygenase activity	GO:0008391	0.0211934	1	CYP1A1
GO:MF	amyloid-beta binding	GO:0001540	0.0237076	7	C1QA,CD74,NGFR,ITGB2,AGER,SORL1,APBB2
GO:MF	aromatase activity	GO:0070330	0.0237076	1	CYP1A1
GO:MF	heparan sulfate binding	GO:1904399	0.0237076	2	MDK,PTN
GO:MF	superoxide-generating NAD(P)H oxidase activity	GO:0016175	0.0237076	3	NCF4,NCF2,CYBB
GO:MF	collagen binding	GO:0005518	0.0237076	6	LUM,MMP9,DCN,ABI3BP,ECM2,CTSS
GO:MF	left-handed Z-DNA binding	GO:0003692	0.0237076	1	ZBP1
GO:MF	phosphoenolpyruvate carboxykinase (GTP) activity	GO:0004613	0.0237076	1	PCK1
GO:MF	ATP-dependent microtubule motor activity, plus-end-directed	GO:0008574	0.0237076	2	KIF18B,CENPE
GO:MF	bile acid receptor activity	GO:0038181	0.0237076	2	GPBAR1,VDR
GO:MF	motor activity	GO:0003774	0.0237076	6	KIF4A,KIF18B,CENPE,KIF15,KIFC1,KIF20A
GO:MF	cAMP-dependent protein kinase regulator activity	GO:0008603	0.0237076	1	CXCL10
GO:MF	phosphoenolpyruvate carboxykinase activity	GO:0004611	0.0237076	1	PCK1
GO:MF	complement component C3b binding	GO:0001851	0.0237076	2	VSIG4,ITGB2
GO:MF	growth factor binding	GO:0019838	0.026197	8	COL1A2,COL1A1,COL3A1,NTRK2,PDGFRA,NGFR,IGFBP6,PTN
GO:MF	ornithine decarboxylase regulator activity	GO:0042979	0.026197	2	AZIN2,OAZ3
GO:MF	complement binding	GO:0001848	0.026197	3	VSIG4,C5AR1,ITGB2
GO:MF	IgM binding	GO:0001791	0.026197	1	CD22
GO:MF	demethylase activity	GO:0032451	0.026197	1	CYP1A1
GO:MF	myosin light chain binding	GO:0032027	0.026197	2	IQGAP3,MYOC
GO:MF	oxygen binding	GO:0019825	0.026197	1	CYP1A1
GO:MF	myosin VI light chain binding	GO:0070856	0.026197	1	IQGAP3
GO:MF	ATP binding	GO:0005524	0.026197	29	AURKB,KIF4A,MKI67,KIF18B,ABCC8,DDX58,NAIP,CENPE,BUB1,UBE2C,TOP2A,DHX58,KIF15,CIITA,AK5,ABCA6,NLRP3,CIT,NLRP1,MAP2K6,KIFC1,ITPKA,ATP8B3,NTRK2,UBA7,KIF20A,CSF1R,PDGFRA,WNK4
GO:MF	steroid hydroxylase activity	GO:0008395	0.026197	1	CYP1A1
GO:MF	single-stranded DNA exodeoxyribonuclease activity	GO:0008297	0.026197	2	POLE,PLD4
GO:MF	dipeptidase activity	GO:0016805	0.026197	2	DPEP3,DPEP2
GO:MF	oxidoreductase activity, acting on paired donors, with incorporation or reduction of molecular oxygen, reduced flavin or flavoprotein as one donor, and incorporation of one atom of oxygen	GO:0016712	0.026197	1	CYP1A1
GO:MF	Hsp90 protein binding	GO:0051879	0.0271949	1	CYP1A1
GO:MF	Hsp70 protein binding	GO:0030544	0.0271949	1	CYP1A1
GO:MF	signaling receptor binding	GO:0005102	0.0289444	43	CXCL10,ISG15,RTP4,CD22,VTCN1,CD2,EDN3,CD74,COL3A1,ANGPTL1,DKK2,TAFA3,PILRA,TNFSF10,MDK,MYOC,FAP,CLEC7A,COL16A1,SELPLG,ANGPT4,ADAM23,MFAP4,PDGFRA,ADA2,TYROBP,CCL21,PITPNM3,BANK1,ITGB2,IGF1,HCST,JAML,IGFBP6,THY1,CLEC11A,PTN,IL18,ADAM11,ECM2,OGN,ITGAX,PTPRD
GO:MF	vascular endothelial growth factor binding	GO:0038085	0.0289444	2	PDGFRA,PTN
GO:MF	MHC class II protein binding, via antigen binding groove	GO:0042658	0.0291895	1	CD74
GO:MF	oxidoreductase activity, acting on paired donors, with incorporation or reduction of molecular oxygen, NAD(P)H as one donor, and incorporation of one atom of oxygen	GO:0016709	0.0294204	1	CYP1A1
GO:MF	histone serine kinase activity	GO:0035174	0.0312079	1	AURKB
GO:MF	identical protein binding	GO:0042802	0.0312079	58	MX1,CEP55,ZBP1,COL1A2,CD2,DDX58,COL1A1,CD74,NDC80,SLC11A1,C1QL3,C1S,TOP2A,IFIT3,CENPF,SLAMF7,CD84,MMP9,NLRP3,ROBO2,TNFSF10,MAP2K6,ZNF365,FAP,CCR5,GHSR,ALOX5AP,CD53,NTRK2,CSF1R,SLAMF8,PDGFRA,ADA2,TYROBP,PRTFDC1,HPGD,WAS,PLP1,BTK,GEN1,JAML,NLRC4,IGFBP6,AGER,FCER1G,MAD2L1,EIF2AK2,TREX2,PDE9A,SARM1,KNSTRN,POLQ,ABCG2,TLR1,KCTD6,MAP3K5,FIBIN,CASKIN1
GO:MF	CXCR chemokine receptor binding	GO:0045236	0.0312079	1	CXCL10
GO:MF	deoxyribonuclease activity	GO:0004536	0.0329895	5	POLE,PLD4,ZGRF1,GEN1,TREX2
GO:MF	G protein-coupled bile acid receptor activity	GO:0038182	0.0329895	1	GPBAR1
GO:MF	double-stranded RNA binding	GO:0003725	0.0329895	4	ZBP1,DDX58,DHX58,NLRP1
GO:MF	transmembrane receptor protein tyrosine kinase activity	GO:0004714	0.0329895	7	PDGFRL,MAP2K6,NTRK2,CSF1R,PDGFRA,BTK,EIF2AK2
GO:MF	proteoglycan binding	GO:0043394	0.0340352	4	ADA2,AGRN,PTN,CTSS
GO:MF	purine ribonucleoside triphosphate binding	GO:0035639	0.0341615	33	MX1,AURKB,PCK1,KIF4A,MKI67,KIF18B,ABCC8,DDX58,NAIP,IFI44L,CENPE,BUB1,UBE2C,TOP2A,DHX58,KIF15,CIITA,AK5,ABCA6,NLRP3,CIT,NLRP1,MAP2K6,KIFC1,ITPKA,ATP8B3,NTRK2,UBA7,RAB3B,KIF20A,CSF1R,PDGFRA,WNK4
GO:MF	hydro-lyase activity	GO:0016836	0.0341615	1	CYP1A1
GO:MF	adenyl ribonucleotide binding	GO:0032559	0.0361953	29	AURKB,KIF4A,MKI67,KIF18B,ABCC8,DDX58,NAIP,CENPE,BUB1,UBE2C,TOP2A,DHX58,KIF15,CIITA,AK5,ABCA6,NLRP3,CIT,NLRP1,MAP2K6,KIFC1,ITPKA,ATP8B3,NTRK2,UBA7,KIF20A,CSF1R,PDGFRA,WNK4
GO:MF	sulfonylurea receptor activity	GO:0008281	0.0364537	1	ABCC8
GO:MF	microtubule binding	GO:0008017	0.0367237	6	MX1,KIF4A,KIF18B,CENPE,CENPF,KIF15
GO:MF	serine-type endopeptidase activity	GO:0004252	0.0367237	6	C2,C1S,MMP9,C1R,TPSB2,FAP
GO:MF	sialic acid binding	GO:0033691	0.0376224	3	CD22,SIGLEC11,AGRN
GO:MF	myosin VI binding	GO:0070853	0.0379088	1	IQGAP3
GO:MF	protein tag	GO:0031386	0.0380807	1	ISG15
GO:MF	adenyl nucleotide binding	GO:0030554	0.0380807	29	AURKB,KIF4A,MKI67,KIF18B,ABCC8,DDX58,NAIP,CENPE,BUB1,UBE2C,TOP2A,DHX58,KIF15,CIITA,AK5,ABCA6,NLRP3,CIT,NLRP1,MAP2K6,KIFC1,ITPKA,ATP8B3,NTRK2,UBA7,KIF20A,CSF1R,PDGFRA,WNK4
GO:MF	carbon-oxygen lyase activity	GO:0016835	0.0387208	1	CYP1A1
GO:MF	neurotrophin binding	GO:0043121	0.0425052	2	NTRK2,NGFR
GO:MF	exopeptidase activity	GO:0008238	0.0445053	5	DPEP3,CPZ,DPEP2,FAP,XPNPEP2
GO:MF	macrophage migration inhibitory factor binding	GO:0035718	0.0450281	1	CD74
GO:MF	metalloexopeptidase activity	GO:0008235	0.0450759	3	DPEP3,CPZ,DPEP2
GO:MF	MHC protein binding	GO:0042287	0.0457838	3	CD74,PILRA,CLEC7A
GO:MF	olfactory receptor binding	GO:0031849	0.0464213	1	RTP4
GO:MF	monooxygenase activity	GO:0004497	0.0478847	1	CYP1A1
GO:MF	5'-flap endonuclease activity	GO:0017108	0.0478945	2	ZGRF1,GEN1
GO:MF	serine-type peptidase activity	GO:0008236	0.0478945	6	C2,C1S,MMP9,C1R,TPSB2,FAP
GO:MF	protein C-terminus binding	GO:0008022	0.0478945	5	MKI67,TOP2A,CENPF,CIITA,CDC20
GO:MF	exodeoxyribonuclease activity, producing 5'-phosphomonoesters	GO:0016895	0.0478945	3	POLE,PLD4,TREX2
GO:MF	scavenger receptor activity	GO:0005044	0.0478945	4	ACKR4,LOXL3,AGER,COLEC12
GO:MF	urocanate hydratase activity	GO:0016153	0.0478945	1	UROC1
GO:MF	chemoattractant activity	GO:0042056	0.0478945	1	CXCL10
GO:MF	exodeoxyribonuclease activity	GO:0004529	0.0478945	3	POLE,PLD4,TREX2
GO:MF	oxidoreductase activity, acting on NAD(P)H, oxygen as acceptor	GO:0050664	0.0478945	3	NCF4,NCF2,CYBB
GO:MF	cell adhesion molecule binding	GO:0050839	0.0478945	20	ISG15,COL3A1,FAP,COL16A1,ADAM23,ITGB2,IGF1,JAML,VSIG10,THY1,PTN,ADAM11,ECM2,ANLN,ITGAX,PTPRD,CDH15,EPS8L2,FMNL2,NPNT
GO:MF	metal ion:proton antiporter activity	GO:0051139	0.0478945	2	SLC11A1,SLC9A9
GO:MF	purine ribonucleotide binding	GO:0032555	0.0478945	33	MX1,AURKB,PCK1,KIF4A,MKI67,KIF18B,ABCC8,DDX58,NAIP,IFI44L,CENPE,BUB1,UBE2C,TOP2A,DHX58,KIF15,CIITA,AK5,ABCA6,NLRP3,CIT,NLRP1,MAP2K6,KIFC1,ITPKA,ATP8B3,NTRK2,UBA7,RAB3B,KIF20A,CSF1R,PDGFRA,WNK4
GO:MF	protein tyrosine kinase activity	GO:0004713	0.0489224	7	PDGFRL,MAP2K6,NTRK2,CSF1R,PDGFRA,BTK,EIF2AK2
GO:MF	endothelin B receptor binding	GO:0031708	0.0489224	1	EDN3
GO:MF	heat shock protein binding	GO:0031072	0.0491043	1	CYP1A1
GO:MF	serine hydrolase activity	GO:0017171	0.0491043	6	C2,C1S,MMP9,C1R,TPSB2,FAP
GO:MF	transmembrane receptor protein kinase activity	GO:0019199	0.0491043	7	PDGFRL,MAP2K6,NTRK2,CSF1R,PDGFRA,BTK,EIF2AK2
GO:MF	purine nucleotide binding	GO:0017076	0.0491043	33	MX1,AURKB,PCK1,KIF4A,MKI67,KIF18B,ABCC8,DDX58,NAIP,IFI44L,CENPE,BUB1,UBE2C,TOP2A,DHX58,KIF15,CIITA,AK5,ABCA6,NLRP3,CIT,NLRP1,MAP2K6,KIFC1,ITPKA,ATP8B3,NTRK2,UBA7,RAB3B,KIF20A,CSF1R,PDGFRA,WNK4
GO:MF	ribonucleotide binding	GO:0032553	0.0491043	33	MX1,AURKB,PCK1,KIF4A,MKI67,KIF18B,ABCC8,DDX58,NAIP,IFI44L,CENPE,BUB1,UBE2C,TOP2A,DHX58,KIF15,CIITA,AK5,ABCA6,NLRP3,CIT,NLRP1,MAP2K6,KIFC1,ITPKA,ATP8B3,NTRK2,UBA7,RAB3B,KIF20A,CSF1R,PDGFRA,WNK4
GO:MF	superoxide-generating NADPH oxidase activator activity	GO:0016176	0.0491043	2	NCF4,NCF2
GO:BP	immune system process	GO:0002376	1.29701e-14	110	CXCL10,IFI6,MX1,ISG15,IFIT1,C3AR1,FCGR3A,PCK1,RTP4,CD22,KIF4A,C2,C1QC,C1QA,ZBP1,COL1A2,VTCN1,CD2,LY86,DDX58,NAIP,EDN3,PLAC8,COL1A1,RTKN2,CD74,IFI44,RSAD2,CD55,SLC11A1,XAF1,IFI44L,GPBAR1,CENPE,RNASE6,VSIG4,PDCD1LG2,C1S,TOP2A,IFIT3,CD180,COL3A1,SLAMF7,XCR1,DHX58,CD84,MPEG1,RBP4,MILR1,MMP9,KIF15,LPXN,CIITA,TAFA3,LAIR1,AIF1,C1R,CD200R1,NCKAP1L,NLRP3,PILRA,TNFAIP8L2,NFAM1,PLD4,NLRP1,TNFSF10,ACKR4,MDK,…
GO:BP	immune response	GO:0006955	1.29701e-14	98	CXCL10,IFI6,MX1,ISG15,IFIT1,C3AR1,FCGR3A,PCK1,RTP4,CD22,C2,C1QC,C1QA,ZBP1,COL1A2,VTCN1,LY86,DDX58,NAIP,PLAC8,COL1A1,CD74,IFI44,RSAD2,CD55,SLC11A1,XAF1,IFI44L,GPBAR1,RNASE6,VSIG4,PDCD1LG2,C1S,IFIT3,CD180,COL3A1,SLAMF7,XCR1,DHX58,CD84,MPEG1,MILR1,MMP9,LPXN,CIITA,LAIR1,AIF1,C1R,CD200R1,NCKAP1L,NLRP3,PILRA,TNFAIP8L2,NFAM1,PLD4,NLRP1,TNFSF10,ACKR4,MDK,CLEC7A,CCR5,PIGR,CD53,SPI1,FCGR1A,CD86,C5AR2,CSF1R…
GO:BP	regulation of immune system process	GO:0002682	2.71891e-14	78	CXCL10,ISG15,IFIT1,C3AR1,FCGR3A,PCK1,CD22,C2,C1QC,C1QA,ZBP1,COL1A2,VTCN1,CD2,DDX58,EDN3,COL1A1,CD74,RSAD2,CD55,SLC11A1,GPBAR1,VSIG4,PDCD1LG2,C1S,COL3A1,SLAMF7,DHX58,CD84,RBP4,MILR1,LPXN,TAFA3,LAIR1,AIF1,C1R,CD200R1,NCKAP1L,NLRP3,PILRA,TNFAIP8L2,NFAM1,MDK,SCIN,EVI2B,CLEC7A,PIGR,SPI1,FCGR1A,CD86,C5AR2,CSF1R,SLAMF8,MFAP4,C5AR1,TYROBP,LAT2,SIT1,CCL21,WAS,BANK1,ITGB2,IGF1,C7,LST1,HERC5,BTK,HCST,LOXL3,…
GO:BP	response to biotic stimulus	GO:0009607	5.22844e-14	74	CYP1A1,CXCL10,IFI6,MX1,ISG15,IFIT1,PCK1,RTP4,C2,C1QC,C1QA,ZBP1,SCN7A,VTCN1,LY86,ABCC8,DDX58,NAIP,PLAC8,CD74,IFI44,RSAD2,CD55,SLC11A1,XAF1,IFI44L,RNASE6,VSIG4,PDCD1LG2,C1S,IFIT3,CD180,SLAMF7,DHX58,CD84,MPEG1,CIITA,AIF1,C1R,NLRP3,TNFAIP8L2,DCN,PLD4,NLRP1,HNMT,FAP,CLEC7A,CCR5,GHSR,SPI1,FCGR1A,CD86,CSF1R,SLAMF8,MFAP4,C5AR1,TYROBP,CCL21,HPGD,IRF9,WAS,BANK1,C7,HERC5,SRPX,BTK,CCDC80,CX3CR1,NLRC4,AGER,CL…
GO:BP	response to other organism	GO:0051707	4.69703e-13	71	CYP1A1,CXCL10,IFI6,MX1,ISG15,IFIT1,PCK1,RTP4,C2,C1QC,C1QA,ZBP1,SCN7A,VTCN1,LY86,ABCC8,DDX58,NAIP,PLAC8,CD74,IFI44,RSAD2,CD55,SLC11A1,XAF1,IFI44L,RNASE6,VSIG4,PDCD1LG2,C1S,IFIT3,CD180,SLAMF7,DHX58,CD84,MPEG1,CIITA,AIF1,C1R,NLRP3,TNFAIP8L2,DCN,PLD4,NLRP1,CLEC7A,CCR5,GHSR,SPI1,FCGR1A,CD86,CSF1R,SLAMF8,MFAP4,C5AR1,TYROBP,CCL21,HPGD,IRF9,WAS,BANK1,C7,HERC5,BTK,CCDC80,CX3CR1,NLRC4,AGER,CLEC4A,FCER1G,EI…
GO:BP	response to external biotic stimulus	GO:0043207	4.69703e-13	71	CYP1A1,CXCL10,IFI6,MX1,ISG15,IFIT1,PCK1,RTP4,C2,C1QC,C1QA,ZBP1,SCN7A,VTCN1,LY86,ABCC8,DDX58,NAIP,PLAC8,CD74,IFI44,RSAD2,CD55,SLC11A1,XAF1,IFI44L,RNASE6,VSIG4,PDCD1LG2,C1S,IFIT3,CD180,SLAMF7,DHX58,CD84,MPEG1,CIITA,AIF1,C1R,NLRP3,TNFAIP8L2,DCN,PLD4,NLRP1,CLEC7A,CCR5,GHSR,SPI1,FCGR1A,CD86,CSF1R,SLAMF8,MFAP4,C5AR1,TYROBP,CCL21,HPGD,IRF9,WAS,BANK1,C7,HERC5,BTK,CCDC80,CX3CR1,NLRC4,AGER,CLEC4A,FCER1G,EI…
GO:BP	biological process involved in interspecies interaction between organisms	GO:0044419	1.78091e-12	74	CYP1A1,CXCL10,IFI6,MX1,ISG15,IFIT1,PCK1,RTP4,C2,C1QC,C1QA,ZBP1,SCN7A,VTCN1,LY86,ABCC8,DDX58,NAIP,PLAC8,CD74,IFI44,RSAD2,CD55,SLC11A1,XAF1,IFI44L,RNASE6,VSIG4,PDCD1LG2,C1S,IFIT3,CD180,SLAMF7,DHX58,CD84,MPEG1,CIITA,AIF1,C1R,RNF213,NLRP3,SIGLEC1,TNFAIP8L2,DCN,PLD4,NLRP1,CLEC7A,CCR5,SELPLG,GHSR,SPI1,FCGR1A,CD86,CSF1R,SLAMF8,MFAP4,C5AR1,TYROBP,CCL21,HPGD,IRF9,WAS,BANK1,C7,HERC5,BTK,CCDC80,CX3CR1,NLRC4…
GO:BP	defense response	GO:0006952	3.06324e-12	78	CXCL10,IFI6,MX1,ISG15,IFIT1,C3AR1,FCGR3A,RTP4,C2,C1QC,C1QA,ZBP1,LY86,DDX58,NAIP,PLAC8,CD74,RSAD2,CD55,SLC11A1,XAF1,SERPINF1,IFI44L,GPBAR1,RNASE6,VSIG4,C1S,IFIT3,CD180,SLAMF7,XCR1,DHX58,CD84,MPEG1,MMP9,CIITA,TAFA3,AIF1,C1R,CD200R1,NLRP3,SIGLEC1,TNFAIP8L2,NFAM1,PLD4,NLRP1,FOLR2,MDK,CLEC7A,CCR5,GHSR,ALOX5AP,SPI1,FCGR1A,C5AR2,CSF1R,SLAMF8,MFAP4,C5AR1,TYROBP,CCL21,IRF9,WAS,ITGB2,IGF1,C7,HERC5,PLP1,BTK…
GO:BP	regulation of immune response	GO:0050776	3.11141e-12	58	ISG15,IFIT1,C3AR1,FCGR3A,PCK1,CD22,C2,C1QC,C1QA,ZBP1,COL1A2,VTCN1,DDX58,COL1A1,CD74,RSAD2,CD55,SLC11A1,GPBAR1,VSIG4,C1S,COL3A1,SLAMF7,DHX58,CD84,LPXN,LAIR1,C1R,CD200R1,NCKAP1L,NLRP3,PILRA,NFAM1,PIGR,SPI1,FCGR1A,CD86,C5AR2,SLAMF8,MFAP4,C5AR1,TYROBP,LAT2,WAS,ITGB2,C7,HERC5,BTK,HCST,LOXL3,JAML,NLRC4,LCP2,AGER,CLEC4A,FCER1G,COLEC12,THY1
GO:BP	innate immune response	GO:0045087	3.11141e-12	53	CXCL10,IFI6,MX1,ISG15,IFIT1,C2,C1QC,C1QA,ZBP1,LY86,DDX58,NAIP,CD74,RSAD2,CD55,SLC11A1,XAF1,RNASE6,VSIG4,C1S,IFIT3,CD180,SLAMF7,DHX58,CD84,MPEG1,CIITA,AIF1,C1R,NLRP3,TNFAIP8L2,PLD4,NLRP1,CLEC7A,SPI1,FCGR1A,CSF1R,SLAMF8,MFAP4,TYROBP,CCL21,IRF9,WAS,C7,HERC5,BTK,CX3CR1,NLRC4,AGER,CLEC4A,FCER1G,EIF2AK2,COLEC12
GO:BP	positive regulation of immune system process	GO:0002684	5.63137e-12	57	CXCL10,C3AR1,FCGR3A,PCK1,CD22,C2,C1QC,C1QA,ZBP1,VTCN1,CD2,DDX58,EDN3,CD74,RSAD2,CD55,SLC11A1,VSIG4,PDCD1LG2,C1S,DHX58,CD84,RBP4,LPXN,TAFA3,AIF1,C1R,NCKAP1L,NLRP3,NFAM1,MDK,EVI2B,CLEC7A,SPI1,FCGR1A,CD86,C5AR2,CSF1R,MFAP4,C5AR1,TYROBP,LAT2,CCL21,WAS,ITGB2,IGF1,C7,BTK,CX3CR1,NLRC4,LCP2,AGER,CLEC4A,FCER1G,THY1,PTN,IL18
GO:BP	defense response to other organism	GO:0098542	4.26236e-11	57	CXCL10,IFI6,MX1,ISG15,IFIT1,RTP4,C2,C1QC,C1QA,ZBP1,LY86,DDX58,NAIP,PLAC8,CD74,RSAD2,CD55,SLC11A1,XAF1,IFI44L,RNASE6,VSIG4,C1S,IFIT3,CD180,SLAMF7,DHX58,CD84,MPEG1,CIITA,AIF1,C1R,NLRP3,TNFAIP8L2,PLD4,NLRP1,CLEC7A,SPI1,FCGR1A,CSF1R,SLAMF8,MFAP4,C5AR1,TYROBP,CCL21,IRF9,WAS,C7,HERC5,BTK,CX3CR1,NLRC4,AGER,CLEC4A,FCER1G,EIF2AK2,COLEC12
GO:BP	response to external stimulus	GO:0009605	5.30988e-11	88	CYP1A1,CXCL10,IFI6,MX1,ISG15,IFIT1,C3AR1,FCGR3A,PCK1,RTP4,C2,C1QC,C1QA,ZBP1,SCN7A,VTCN1,LY86,ABCC8,DDX58,NAIP,EDN3,PLAC8,COL1A1,CD74,IFI44,RSAD2,CD55,SLC11A1,XAF1,SERPINF1,IFI44L,GPBAR1,RNASE6,VSIG4,PDCD1LG2,C1S,IFIT3,CD180,COL3A1,SLAMF7,XCR1,DHX58,CD84,MPEG1,NPAS1,MMP9,CNTNAP2,CIITA,TAFA3,AIF1,C1R,CD200R1,NCKAP1L,NLRP3,TNFAIP8L2,ROBO2,DCN,PLD4,NLRP1,ACKR4,FOLR2,MDK,FAP,CLEC7A,SLITRK6,CCR5,GHSR,A…
GO:BP	positive regulation of response to stimulus	GO:0048584	1.59537e-10	83	CXCL10,FOXM1,C3AR1,FCGR3A,PCK1,CD22,C2,ASPM,C1QC,C1QA,ZBP1,VTCN1,LY86,IQGAP3,DDX58,EDN3,COL1A1,RTKN2,CD74,NDC80,RSAD2,CD55,SLC11A1,GPBAR1,VSIG4,SFRP4,C1S,FGD2,CD180,COL3A1,DHX58,TMEM108,G0S2,MMP9,DKK2,LPXN,TAFA3,AIF1,C1R,NCKAP1L,NLRP3,NFAM1,ROBO2,DCN,TNFSF10,MAP2K6,MDK,MYOC,CLEC7A,GHSR,ALOX5AP,SPI1,FCGR1A,NTRK2,CD86,C5AR2,CSF1R,MFAP4,PDGFRA,C5AR1,TYROBP,LAT2,CCL21,NGFR,WAS,BANK1,ITGB2,IGF1,C7,SRP…
GO:BP	immune effector process	GO:0002252	1.28371e-09	49	C3AR1,FCGR3A,PCK1,CD22,C2,C1QC,C1QA,DDX58,PLAC8,CD74,RSAD2,CD55,SLC11A1,VSIG4,C1S,CD180,SLAMF7,DHX58,CD84,RBP4,MILR1,MMP9,LAIR1,C1R,NCKAP1L,NLRP3,NFAM1,MDK,CLEC7A,PIGR,CD53,SPI1,FCGR1A,CD86,C5AR2,SLAMF8,MFAP4,C5AR1,ADA2,TYROBP,LAT2,WAS,ITGB2,C7,BTK,LOXL3,GHDC,TCN1,CRISPLD2
GO:BP	regulation of immune effector process	GO:0002697	3.3433e-09	28	C3AR1,PCK1,CD22,C2,C1QC,C1QA,DDX58,CD74,RSAD2,CD55,VSIG4,C1S,DHX58,CD84,RBP4,NLRP3,CLEC7A,SPI1,CD86,C5AR2,SLAMF8,C5AR1,TYROBP,WAS,ITGB2,C7,BTK,LOXL3
GO:BP	cell activation	GO:0001775	4.9556e-09	67	CXCL10,C3AR1,PCK1,CD22,C1QA,COL1A2,VTCN1,CD2,PLAC8,COL1A1,CD74,RSAD2,CD55,SLC11A1,VSIG4,PDCD1LG2,CD180,COL3A1,SLAMF7,CD84,MILR1,MMP9,TAFA3,LAIR1,AIF1,NCKAP1L,NLRP3,TNFAIP8L2,NFAM1,MDK,CLEC7A,SELPLG,PIGR,CD53,SPI1,CD86,SLAMF8,PDGFRA,C5AR1,ADA2,TYROBP,LAT2,SIT1,CCL21,WAS,BANK1,ITGB2,IGF1,LST1,BTK,LOXL3,GHDC,JAML,TCN1,CRISPLD2,LCP2,AGER,CLEC4A,FCER1G,THY1,IL18,SOX12,CTSZ,CTSS,ITGAX,PTGDS,ATP8B4
GO:BP	cell adhesion	GO:0007155	5.78158e-09	66	PCK1,CD22,VTCN1,CD2,COL1A1,TROAP,CD74,CD55,VSIG4,PDCD1LG2,COL3A1,NDNF,SLAMF7,SIGLEC11,CD84,MILR1,CNTNAP2,LPXN,AIF1,FAT3,CD200R1,NCKAP1L,NLRP3,SIGLEC1,TNFAIP8L2,ROBO2,FOLR2,MDK,MYOC,CLSTN3,FAP,COL16A1,SELPLG,EPB41L5,SPI1,CD86,ADAM23,MFAP4,PDGFRA,PARVG,CCL21,COL4A6,ITGB2,IGF1,MXRA8,CNTN1,SRPX,CCDC80,LOXL3,CX3CR1,JAML,VSIG10,ABI3BP,AGER,CLEC4A,EFS,LRRC4,THY1,COL7A1,LGALS4,PTN,IL18,ECM2,SOX12,ITGAX,P…
GO:BP	leukocyte activation	GO:0045321	5.9483e-09	62	C3AR1,PCK1,CD22,C1QA,VTCN1,CD2,PLAC8,CD74,RSAD2,CD55,SLC11A1,VSIG4,PDCD1LG2,CD180,SLAMF7,CD84,MILR1,MMP9,TAFA3,LAIR1,AIF1,NCKAP1L,NLRP3,TNFAIP8L2,NFAM1,MDK,CLEC7A,SELPLG,PIGR,CD53,SPI1,CD86,SLAMF8,C5AR1,ADA2,TYROBP,LAT2,SIT1,CCL21,WAS,BANK1,ITGB2,IGF1,LST1,BTK,LOXL3,GHDC,JAML,TCN1,CRISPLD2,LCP2,AGER,CLEC4A,FCER1G,THY1,IL18,SOX12,CTSZ,CTSS,ITGAX,PTGDS,ATP8B4
GO:BP	biological adhesion	GO:0022610	6.37517e-09	66	PCK1,CD22,VTCN1,CD2,COL1A1,TROAP,CD74,CD55,VSIG4,PDCD1LG2,COL3A1,NDNF,SLAMF7,SIGLEC11,CD84,MILR1,CNTNAP2,LPXN,AIF1,FAT3,CD200R1,NCKAP1L,NLRP3,SIGLEC1,TNFAIP8L2,ROBO2,FOLR2,MDK,MYOC,CLSTN3,FAP,COL16A1,SELPLG,EPB41L5,SPI1,CD86,ADAM23,MFAP4,PDGFRA,PARVG,CCL21,COL4A6,ITGB2,IGF1,MXRA8,CNTN1,SRPX,CCDC80,LOXL3,CX3CR1,JAML,VSIG10,ABI3BP,AGER,CLEC4A,EFS,LRRC4,THY1,COL7A1,LGALS4,PTN,IL18,ECM2,SOX12,ITGAX,P…
GO:BP	regulation of cytokine production	GO:0001817	8.45201e-09	42	ISG15,C3AR1,ZBP1,VTCN1,CD2,ABCC8,DDX58,CD74,RSAD2,CD55,SLC11A1,VSIG4,PDCD1LG2,LUM,DHX58,CD84,AIF1,CD200R1,NCKAP1L,NLRP3,NFAM1,PLD4,NLRP1,MDK,CLEC7A,GHSR,CD86,C5AR2,UBA7,CSF1R,C5AR1,TYROBP,BANK1,IGF1,HERC5,BTK,CX3CR1,NLRC4,AGER,CLEC4A,FCER1G,EIF2AK2
GO:BP	cytokine production	GO:0001816	1.04503e-08	42	ISG15,C3AR1,ZBP1,VTCN1,CD2,ABCC8,DDX58,CD74,RSAD2,CD55,SLC11A1,VSIG4,PDCD1LG2,LUM,DHX58,CD84,AIF1,CD200R1,NCKAP1L,NLRP3,NFAM1,PLD4,NLRP1,MDK,CLEC7A,GHSR,CD86,C5AR2,UBA7,CSF1R,C5AR1,TYROBP,BANK1,IGF1,HERC5,BTK,CX3CR1,NLRC4,AGER,CLEC4A,FCER1G,EIF2AK2
GO:BP	response to virus	GO:0009615	3.56686e-08	14	CYP1A1,CXCL10,IFI6,MX1,ISG15,IFIT1,RTP4,ZBP1,DDX58,IFI44,RSAD2,IFI44L,RNASE6,IFIT3
GO:BP	regulation of response to stimulus	GO:0048583	5.04123e-08	118	CXCL10,IFI6,ISG15,FOXM1,AURKB,IFIT1,C3AR1,FCGR3A,PCK1,CEP55,CD22,C2,ASPM,C1QC,C1QA,ZBP1,COL1A2,VTCN1,LY86,ABCC8,IQGAP3,DDX58,EDN3,COL1A1,SHISA3,RTKN2,CD74,NDC80,RSAD2,CD55,SLC11A1,SERPINF1,GPBAR1,VSIG4,SFRP4,C1S,FGD2,CD180,COL3A1,SLAMF7,DHX58,CD84,TMEM108,G0S2,MMP9,DKK2,LPXN,TAFA3,LAIR1,AIF1,C1R,RNF213,RGS18,CD200R1,NCKAP1L,NLRP3,PILRA,SRGAP3,TNFAIP8L2,NFAM1,ROBO2,DCN,CIT,NLRP1,TNFSF10,MAP2K6,DLG…
GO:BP	defense response to symbiont	GO:0140546	8.76629e-08	13	CXCL10,IFI6,MX1,ISG15,IFIT1,RTP4,ZBP1,DDX58,RSAD2,IFI44L,RNASE6,IFIT3,DHX58
GO:BP	defense response to virus	GO:0051607	8.76629e-08	13	CXCL10,IFI6,MX1,ISG15,IFIT1,RTP4,ZBP1,DDX58,RSAD2,IFI44L,RNASE6,IFIT3,DHX58
GO:BP	positive regulation of multicellular organismal process	GO:0051240	1.02422e-07	63	ISG15,C3AR1,PCK1,ASPM,ZBP1,VTCN1,CD2,ABCC8,IQGAP3,DDX58,EDN3,PLAC8,COL1A1,CD74,RSAD2,CD55,SLC11A1,SERPINF1,LUM,DHX58,G0S2,AIF1,NCKAP1L,NLRP3,NFAM1,ROBO2,NLRP1,MDK,CLSTN3,ZNF365,EVI2B,CLEC7A,SLITRK6,ITPKA,GHSR,ANGPT4,NTRK2,CD86,CSF1R,C5AR1,TYROBP,NGFR,SLITRK5,ITGB2,IGF1,BTK,CX3CR1,NLRC4,ABI3BP,AGER,AGRN,FCER1G,EIF2AK2,OPRL1,BASP1,PTN,IL18,ZFPM2,SORL1,SOX12,ITGAX,PTPRD,PDE9A
GO:BP	inflammatory response	GO:0006954	1.02422e-07	42	CXCL10,C3AR1,FCGR3A,ZBP1,LY86,NAIP,SLC11A1,SERPINF1,GPBAR1,CD180,XCR1,MMP9,CIITA,TAFA3,AIF1,CD200R1,NLRP3,SIGLEC1,TNFAIP8L2,NFAM1,PLD4,NLRP1,FOLR2,MDK,CLEC7A,CCR5,GHSR,ALOX5AP,FCGR1A,C5AR2,CSF1R,SLAMF8,C5AR1,CCL21,ITGB2,IGF1,PLP1,BTK,LOXL3,NLRC4,ABI3BP,AGER
GO:BP	lymphocyte activation	GO:0046649	1.96771e-07	38	PCK1,CD22,VTCN1,CD2,CD74,RSAD2,CD55,SLC11A1,VSIG4,PDCD1LG2,CD180,SLAMF7,AIF1,NCKAP1L,NLRP3,TNFAIP8L2,NFAM1,MDK,CLEC7A,SPI1,CD86,SLAMF8,TYROBP,LAT2,SIT1,CCL21,WAS,BANK1,ITGB2,IGF1,LST1,BTK,LOXL3,JAML,AGER,CLEC4A,FCER1G,THY1
GO:BP	response to stimulus	GO:0050896	2.14449e-07	186	CYP1A1,GLYAT,CXCL10,IFI6,MX1,ISG15,PCLAF,FOXM1,AURKB,IFIT1,C3AR1,FCGR3A,PCK1,CEP55,RTP4,CD22,C2,ASPM,C1QC,CDCA5,C1QA,ZBP1,SCN7A,COL1A2,VTCN1,CD2,LY86,ABCC8,IQGAP3,DDX58,NAIP,EDN3,PLAC8,COL1A1,SHISA3,RTKN2,CD74,NDC80,IFI44,RSAD2,CD55,SLC11A1,XAF1,SERPINF1,IFI44L,GPBAR1,RNASE6,VSIG4,BUB1,SFRP4,PDCD1LG2,CPZ,C1S,TOP2A,FGD2,IFIT3,CD180,COL3A1,NDNF,CENPF,SLAMF7,XCR1,LUM,DHX58,FAM83E,CD84,FMOD,MPEG1,TME…
GO:BP	myeloid leukocyte migration	GO:0097529	2.6953e-07	19	CXCL10,C3AR1,EDN3,CD74,AIF1,CD200R1,NCKAP1L,MDK,SPI1,C5AR2,CSF1R,SLAMF8,C5AR1,CCL21,ITGB2,CX3CR1,JAML,AGER,FCER1G
GO:BP	sister chromatid segregation	GO:0000819	2.6953e-07	13	AURKB,KIF4A,CDCA8,CDCA5,KIF18B,NDC80,CENPE,BUB1,UBE2C,TOP2A,CENPF,CDC20,KNTC1
GO:BP	positive regulation of immune response	GO:0050778	2.6953e-07	37	C3AR1,FCGR3A,PCK1,CD22,C2,C1QC,C1QA,ZBP1,VTCN1,CD74,RSAD2,CD55,SLC11A1,VSIG4,C1S,LPXN,C1R,NCKAP1L,NLRP3,NFAM1,SPI1,FCGR1A,CD86,C5AR2,MFAP4,C5AR1,TYROBP,LAT2,WAS,ITGB2,C7,BTK,NLRC4,LCP2,CLEC4A,FCER1G,THY1
GO:BP	regulation of cell activation	GO:0050865	3.07819e-07	36	PCK1,CD22,VTCN1,CD2,CD74,CD55,VSIG4,PDCD1LG2,CD84,MILR1,TAFA3,AIF1,NCKAP1L,NLRP3,TNFAIP8L2,NFAM1,MDK,CLEC7A,SPI1,CD86,SLAMF8,PDGFRA,TYROBP,SIT1,CCL21,BANK1,ITGB2,IGF1,LST1,BTK,LOXL3,AGER,FCER1G,THY1,IL18,SOX12
GO:BP	regulation of mitotic metaphase/anaphase transition	GO:0030071	3.07819e-07	11	AURKB,NDC80,CENPE,BUB1,UBE2C,CENPF,CDC20,KNTC1,GEN1,MAD2L1,ESPL1
GO:BP	leukocyte migration	GO:0050900	3.33808e-07	30	CXCL10,C3AR1,COL1A2,CD2,EDN3,COL1A1,CD74,CD84,MMP9,AIF1,CD200R1,NCKAP1L,NLRP3,MDK,CCR5,SELPLG,SPI1,ANGPT4,C5AR2,CSF1R,SLAMF8,C5AR1,CCL21,ITGB2,CX3CR1,JAML,AGER,FCER1G,THY1,PTN
GO:BP	regulation of leukocyte chemotaxis	GO:0002688	3.90662e-07	13	CXCL10,C3AR1,EDN3,CD74,AIF1,NCKAP1L,MDK,SPI1,C5AR2,CSF1R,SLAMF8,C5AR1,CCL21
GO:BP	cell surface receptor signaling pathway	GO:0007166	4.0074e-07	98	CXCL10,IFI6,MX1,ISG15,IFIT1,C3AR1,FCGR3A,CD22,ASPM,ZBP1,COL1A2,VTCN1,CD2,LY86,EDN3,COL1A1,SHISA3,CD74,RSAD2,CD55,XAF1,GPBAR1,SFRP4,PDCD1LG2,CPZ,IFIT3,CD180,COL3A1,XCR1,FMOD,TMEM108,MILR1,G0S2,ANGPTL1,MMP9,DKK2,LPXN,CIITA,PDGFRL,RNF213,CD200R1,NCKAP1L,NLRP3,NFAM1,ROBO2,DCN,TNFSF10,ACKR4,MDK,MYOC,COL16A1,CCR5,PIGR,GHSR,F13A1,SPI1,FCGR1A,ANGPT4,NTRK2,CD86,C5AR2,CSF1R,PDGFRA,C5AR1,TYROBP,LAT2,CCL21,I…
GO:BP	metaphase/anaphase transition of mitotic cell cycle	GO:0007091	4.0074e-07	11	AURKB,NDC80,CENPE,BUB1,UBE2C,CENPF,CDC20,KNTC1,GEN1,MAD2L1,ESPL1
GO:BP	negative regulation of immune system process	GO:0002683	4.19003e-07	30	ISG15,FCGR3A,CD22,C1QC,VTCN1,CD74,CD55,GPBAR1,VSIG4,PDCD1LG2,COL3A1,DHX58,CD84,MILR1,LPXN,TAFA3,CD200R1,TNFAIP8L2,MDK,SPI1,FCGR1A,CD86,C5AR2,SLAMF8,TYROBP,CCL21,BANK1,LST1,BTK,LOXL3
GO:BP	mitotic sister chromatid segregation	GO:0000070	4.33049e-07	12	AURKB,KIF4A,CDCA8,CDCA5,KIF18B,NDC80,CENPE,BUB1,UBE2C,CENPF,CDC20,KNTC1
GO:BP	regulation of metaphase/anaphase transition of cell cycle	GO:1902099	4.36248e-07	11	AURKB,NDC80,CENPE,BUB1,UBE2C,CENPF,CDC20,KNTC1,GEN1,MAD2L1,ESPL1
GO:BP	regulation of leukocyte activation	GO:0002694	4.36248e-07	30	PCK1,CD22,VTCN1,CD2,CD74,CD55,VSIG4,PDCD1LG2,CD84,MILR1,TAFA3,AIF1,NCKAP1L,NLRP3,TNFAIP8L2,NFAM1,MDK,CLEC7A,SPI1,CD86,SLAMF8,TYROBP,SIT1,CCL21,BANK1,ITGB2,IGF1,LST1,BTK,LOXL3
GO:BP	myeloid leukocyte activation	GO:0002274	4.86669e-07	37	C3AR1,C1QA,CD2,PLAC8,CD74,CD55,SLC11A1,VSIG4,CD84,MILR1,MMP9,TAFA3,LAIR1,AIF1,NCKAP1L,NFAM1,PIGR,CD53,SPI1,C5AR1,ADA2,TYROBP,LAT2,ITGB2,BTK,GHDC,TCN1,CRISPLD2,LCP2,AGER,FCER1G,IL18,CTSZ,CTSS,ITGAX,PTGDS,ATP8B4
GO:BP	type I interferon signaling pathway	GO:0060337	4.90789e-07	8	IFI6,MX1,ISG15,IFIT1,ZBP1,RSAD2,XAF1,IFIT3
GO:BP	regulation of mitotic sister chromatid separation	GO:0010965	4.90789e-07	11	AURKB,NDC80,CENPE,BUB1,UBE2C,CENPF,CDC20,KNTC1,GEN1,MAD2L1,ESPL1
GO:BP	cellular response to type I interferon	GO:0071357	5.21879e-07	8	IFI6,MX1,ISG15,IFIT1,ZBP1,RSAD2,XAF1,IFIT3
GO:BP	metaphase/anaphase transition of cell cycle	GO:0044784	5.54944e-07	11	AURKB,NDC80,CENPE,BUB1,UBE2C,CENPF,CDC20,KNTC1,GEN1,MAD2L1,ESPL1
GO:BP	regulation of chromosome segregation	GO:0051983	5.54944e-07	9	AURKB,MKI67,NDC80,CENPE,BUB1,UBE2C,CENPF,CDC20,KNTC1
GO:BP	mitotic sister chromatid separation	GO:0051306	6.32403e-07	11	AURKB,NDC80,CENPE,BUB1,UBE2C,CENPF,CDC20,KNTC1,GEN1,MAD2L1,ESPL1
GO:BP	response to type I interferon	GO:0034340	7.18393e-07	8	IFI6,MX1,ISG15,IFIT1,ZBP1,RSAD2,XAF1,IFIT3
GO:BP	regulation of response to external stimulus	GO:0032101	8.22435e-07	39	CXCL10,ISG15,IFIT1,C3AR1,FCGR3A,ZBP1,LY86,ABCC8,DDX58,EDN3,CD74,CD55,SERPINF1,GPBAR1,VSIG4,CD180,DHX58,MMP9,TAFA3,AIF1,CD200R1,NCKAP1L,NLRP3,TNFAIP8L2,ROBO2,NLRP1,MDK,FAP,GHSR,ALOX5AP,SPI1,FCGR1A,RTN4RL1,C5AR2,CSF1R,SLAMF8,PDGFRA,C5AR1,TYROBP
GO:BP	positive regulation of leukocyte migration	GO:0002687	9.9276e-07	15	CXCL10,C3AR1,EDN3,CD74,AIF1,NCKAP1L,MDK,SPI1,CSF1R,C5AR1,CCL21,CX3CR1,AGER,THY1,PTN
GO:BP	leukocyte mediated immunity	GO:0002443	9.9276e-07	43	C3AR1,C2,C1QC,C1QA,DDX58,PLAC8,CD74,RSAD2,CD55,SLC11A1,C1S,SLAMF7,CD84,MILR1,MMP9,LAIR1,C1R,NCKAP1L,NLRP3,NFAM1,CLEC7A,PIGR,CD53,SPI1,C5AR1,ADA2,TYROBP,LAT2,WAS,ITGB2,C7,BTK,GHDC,TCN1,CRISPLD2,AGER,FCER1G,IL18,CTSZ,CTSS,ITGAX,PTGDS,ATP8B4
GO:BP	organelle fission	GO:0048285	1.07785e-06	15	MX1,AURKB,KIF4A,ASPM,CDCA8,MKI67,CDCA5,KIF18B,EDN3,NDC80,CENPE,BUB1,UBE2C,TOP2A,CENPF
GO:BP	positive regulation of cytokine production	GO:0001819	1.09095e-06	29	ISG15,C3AR1,ZBP1,VTCN1,CD2,ABCC8,DDX58,CD74,RSAD2,CD55,SLC11A1,LUM,DHX58,AIF1,NLRP3,NFAM1,NLRP1,MDK,CLEC7A,CD86,CSF1R,C5AR1,TYROBP,NLRC4,AGER,FCER1G,EIF2AK2,IL18,SORL1
GO:BP	negative regulation of cell activation	GO:0050866	1.09173e-06	17	VTCN1,CD74,VSIG4,PDCD1LG2,CD84,MILR1,TAFA3,TNFAIP8L2,MDK,SPI1,CD86,PDGFRA,TYROBP,BANK1,LST1,BTK,LOXL3
GO:BP	cell chemotaxis	GO:0060326	1.11029e-06	22	CXCL10,C3AR1,EDN3,CD74,XCR1,AIF1,NCKAP1L,ACKR4,MDK,CCR5,SPI1,C5AR2,CSF1R,SLAMF8,PDGFRA,C5AR1,CCL21,ITGB2,CX3CR1,JAML,FCER1G,PTN
GO:BP	chromosome separation	GO:0051304	1.12098e-06	9	AURKB,NDC80,CENPE,BUB1,UBE2C,TOP2A,CENPF,CDC20,KNTC1
GO:BP	regulation of chromosome separation	GO:1905818	1.16769e-06	11	AURKB,NDC80,CENPE,BUB1,UBE2C,CENPF,CDC20,KNTC1,GEN1,MAD2L1,ESPL1
GO:BP	regulation of sister chromatid segregation	GO:0033045	1.16769e-06	11	AURKB,NDC80,CENPE,BUB1,UBE2C,CENPF,CDC20,KNTC1,GEN1,MAD2L1,ESPL1
GO:BP	negative regulation of leukocyte activation	GO:0002695	1.30973e-06	16	VTCN1,CD74,VSIG4,PDCD1LG2,CD84,MILR1,TAFA3,TNFAIP8L2,MDK,SPI1,CD86,TYROBP,BANK1,LST1,BTK,LOXL3
GO:BP	T cell activation	GO:0042110	1.3935e-06	29	PCK1,VTCN1,CD2,CD74,RSAD2,CD55,SLC11A1,VSIG4,PDCD1LG2,AIF1,NCKAP1L,NLRP3,TNFAIP8L2,MDK,CLEC7A,SPI1,CD86,SIT1,CCL21,WAS,IGF1,LOXL3,JAML,AGER,CLEC4A,FCER1G,THY1,IL18,SOX12
GO:BP	regulation of leukocyte migration	GO:0002685	1.44172e-06	18	CXCL10,C3AR1,EDN3,CD74,AIF1,CD200R1,NCKAP1L,MDK,SPI1,C5AR2,CSF1R,SLAMF8,C5AR1,CCL21,CX3CR1,AGER,THY1,PTN
GO:BP	antiviral innate immune response	GO:0140374	1.50085e-06	4	CXCL10,MX1,IFIT1,DDX58
GO:BP	positive regulation of leukocyte chemotaxis	GO:0002690	1.56541e-06	11	CXCL10,C3AR1,EDN3,CD74,AIF1,NCKAP1L,MDK,SPI1,CSF1R,C5AR1,CCL21
GO:BP	regulation of multicellular organismal process	GO:0051239	1.89343e-06	88	CXCL10,ISG15,C3AR1,PCK1,ASPM,C1QC,ZBP1,VTCN1,CD2,ABCC8,IQGAP3,DDX58,EDN3,PLAC8,COL1A1,CD74,RSAD2,CD55,SLC11A1,SERPINF1,VSIG4,SFRP4,PDCD1LG2,LUM,DHX58,CD84,TMEM108,RBP4,G0S2,MMP9,AIF1,CD200R1,NCKAP1L,NLRP3,NFAM1,ROBO2,DCN,PLD4,NLRP1,MAP2K6,DLGAP1,MDK,CLSTN3,ZNF365,SCIN,FAP,EVI2B,CLEC7A,SLITRK6,ITPKA,GHSR,EPB41L5,SPI1,ANGPT4,NTRK2,CD86,C5AR2,UBA7,CSF1R,SLAMF8,PDGFRA,WNK4,C5AR1,TYROBP,NGFR,SLITRK5,B…
GO:BP	nuclear division	GO:0000280	2.08526e-06	14	AURKB,KIF4A,ASPM,CDCA8,MKI67,CDCA5,KIF18B,EDN3,NDC80,CENPE,BUB1,UBE2C,TOP2A,CENPF
GO:BP	leukocyte activation involved in immune response	GO:0002366	2.21283e-06	37	C3AR1,PCK1,PLAC8,CD74,CD55,SLC11A1,CD180,CD84,MILR1,MMP9,LAIR1,NCKAP1L,NLRP3,NFAM1,MDK,CLEC7A,PIGR,CD53,SPI1,CD86,C5AR1,ADA2,TYROBP,LAT2,ITGB2,BTK,LOXL3,GHDC,TCN1,CRISPLD2,FCER1G,IL18,CTSZ,CTSS,ITGAX,PTGDS,ATP8B4
GO:BP	mitotic nuclear division	GO:0140014	2.43512e-06	12	AURKB,KIF4A,CDCA8,MKI67,CDCA5,KIF18B,EDN3,NDC80,CENPE,BUB1,UBE2C,CENPF
GO:BP	regulation of neutrophil migration	GO:1902622	2.43785e-06	8	C3AR1,CD74,NCKAP1L,MDK,C5AR2,SLAMF8,C5AR1,CCL21
GO:BP	cell activation involved in immune response	GO:0002263	2.44493e-06	37	C3AR1,PCK1,PLAC8,CD74,CD55,SLC11A1,CD180,CD84,MILR1,MMP9,LAIR1,NCKAP1L,NLRP3,NFAM1,MDK,CLEC7A,PIGR,CD53,SPI1,CD86,C5AR1,ADA2,TYROBP,LAT2,ITGB2,BTK,LOXL3,GHDC,TCN1,CRISPLD2,FCER1G,IL18,CTSZ,CTSS,ITGAX,PTGDS,ATP8B4
GO:BP	activation of immune response	GO:0002253	2.8906e-06	29	C3AR1,FCGR3A,CD22,C2,C1QC,C1QA,ZBP1,VTCN1,CD55,VSIG4,C1S,LPXN,C1R,NCKAP1L,NFAM1,FCGR1A,C5AR2,MFAP4,C5AR1,TYROBP,LAT2,WAS,C7,BTK,NLRC4,LCP2,CLEC4A,FCER1G,THY1
GO:BP	chromosome segregation	GO:0007059	2.8906e-06	12	AURKB,KIF4A,CDCA8,MKI67,CDCA5,KIF18B,NDC80,CENPE,BUB1,UBE2C,TOP2A,CENPF
GO:BP	response to stress	GO:0006950	3.22057e-06	42	CYP1A1,CXCL10,IFI6,MX1,ISG15,PCLAF,FOXM1,IFIT1,C3AR1,FCGR3A,PCK1,RTP4,C2,C1QC,CDCA5,C1QA,ZBP1,COL1A2,LY86,ABCC8,DDX58,NAIP,PLAC8,COL1A1,CD74,RSAD2,CD55,SLC11A1,XAF1,SERPINF1,IFI44L,GPBAR1,RNASE6,VSIG4,C1S,TOP2A,IFIT3,CD180,COL3A1,NDNF,SLAMF7,XCR1
GO:BP	leukocyte chemotaxis	GO:0030595	3.4938e-06	18	CXCL10,C3AR1,EDN3,CD74,AIF1,NCKAP1L,MDK,CCR5,SPI1,C5AR2,CSF1R,SLAMF8,C5AR1,CCL21,ITGB2,JAML,FCER1G,PTN
GO:BP	regulation of lymphocyte activation	GO:0051249	3.77662e-06	29	PCK1,CD22,VTCN1,CD2,CD74,CD55,VSIG4,PDCD1LG2,AIF1,NCKAP1L,NLRP3,TNFAIP8L2,NFAM1,MDK,CLEC7A,CD86,SLAMF8,TYROBP,SIT1,CCL21,BANK1,IGF1,LST1,BTK,LOXL3,AGER,THY1,IL18,SOX12
GO:BP	neutrophil migration	GO:1990266	3.81447e-06	13	CXCL10,C3AR1,EDN3,CD74,NCKAP1L,MDK,C5AR2,SLAMF8,C5AR1,CCL21,ITGB2,JAML,FCER1G
GO:BP	nuclear chromosome segregation	GO:0098813	3.81447e-06	11	AURKB,KIF4A,CDCA8,CDCA5,KIF18B,NDC80,CENPE,BUB1,UBE2C,TOP2A,CENPF
GO:BP	neutrophil chemotaxis	GO:0030593	4.03343e-06	12	CXCL10,C3AR1,EDN3,CD74,NCKAP1L,MDK,C5AR2,C5AR1,CCL21,ITGB2,JAML,FCER1G
GO:BP	extracellular matrix organization	GO:0030198	4.39489e-06	26	COL1A2,COL1A1,COL23A1,COL3A1,NDNF,LUM,FMOD,MMP9,DCN,FAP,COL16A1,MFAP4,PDGFRA,COL24A1,COL4A6,ITGB2,CCDC80,LOXL3,CRISPLD2,ABI3BP,AGRN,COL7A1,ECM2,CTSS,ITGAX,COL4A5
GO:BP	extracellular structure organization	GO:0043062	4.55172e-06	26	COL1A2,COL1A1,COL23A1,COL3A1,NDNF,LUM,FMOD,MMP9,DCN,FAP,COL16A1,MFAP4,PDGFRA,COL24A1,COL4A6,ITGB2,CCDC80,LOXL3,CRISPLD2,ABI3BP,AGRN,COL7A1,ECM2,CTSS,ITGAX,COL4A5
GO:BP	granulocyte chemotaxis	GO:0071621	4.81402e-06	13	CXCL10,C3AR1,EDN3,CD74,NCKAP1L,MDK,C5AR2,CSF1R,C5AR1,CCL21,ITGB2,JAML,FCER1G
GO:BP	external encapsulating structure organization	GO:0045229	4.88225e-06	26	COL1A2,COL1A1,COL23A1,COL3A1,NDNF,LUM,FMOD,MMP9,DCN,FAP,COL16A1,MFAP4,PDGFRA,COL24A1,COL4A6,ITGB2,CCDC80,LOXL3,CRISPLD2,ABI3BP,AGRN,COL7A1,ECM2,CTSS,ITGAX,COL4A5
GO:BP	granulocyte migration	GO:0097530	5.35117e-06	14	CXCL10,C3AR1,EDN3,CD74,NCKAP1L,MDK,C5AR2,CSF1R,SLAMF8,C5AR1,CCL21,ITGB2,JAML,FCER1G
GO:BP	response to bacterium	GO:0009617	5.36169e-06	33	CYP1A1,CXCL10,ISG15,PCK1,SCN7A,LY86,ABCC8,NAIP,PLAC8,IFI44,CD55,SLC11A1,RNASE6,PDCD1LG2,CD180,DHX58,MPEG1,NLRP3,DCN,NLRP1,CCR5,GHSR,SPI1,CD86,SLAMF8,C5AR1,HPGD,BANK1,CCDC80,CX3CR1,NLRC4,FCER1G,COLEC12
GO:BP	regulation of neutrophil chemotaxis	GO:0090022	5.36169e-06	7	C3AR1,CD74,NCKAP1L,MDK,C5AR2,C5AR1,CCL21
GO:BP	mitotic spindle checkpoint signaling	GO:0071174	6.09998e-06	8	AURKB,NDC80,BUB1,CENPF,CDC20,KNTC1,GEN1,MAD2L1
GO:BP	mitotic spindle assembly checkpoint signaling	GO:0007094	6.09998e-06	8	AURKB,NDC80,BUB1,CENPF,CDC20,KNTC1,GEN1,MAD2L1
GO:BP	spindle assembly checkpoint signaling	GO:0071173	6.09998e-06	8	AURKB,NDC80,BUB1,CENPF,CDC20,KNTC1,GEN1,MAD2L1
GO:BP	regulation of chemotaxis	GO:0050920	6.8547e-06	15	CXCL10,C3AR1,EDN3,CD74,AIF1,NCKAP1L,ROBO2,MDK,SPI1,C5AR2,CSF1R,SLAMF8,PDGFRA,C5AR1,CCL21
GO:BP	spindle checkpoint signaling	GO:0031577	7.40679e-06	8	AURKB,NDC80,BUB1,CENPF,CDC20,KNTC1,GEN1,MAD2L1
GO:BP	negative regulation of mitotic metaphase/anaphase transition	GO:0045841	9.03628e-06	8	AURKB,NDC80,BUB1,CENPF,CDC20,KNTC1,GEN1,MAD2L1
GO:BP	regulation of granulocyte chemotaxis	GO:0071622	9.05248e-06	8	C3AR1,CD74,NCKAP1L,MDK,C5AR2,CSF1R,C5AR1,CCL21
GO:BP	regulation of complement activation	GO:0030449	1.01814e-05	7	C3AR1,C2,C1QC,C1QA,CD55,VSIG4,C1S
GO:BP	regulation of mitotic nuclear division	GO:0007088	1.06166e-05	12	AURKB,MKI67,EDN3,NDC80,BUB1,CENPF,CDC20,KNTC1,IGF1,GEN1,MAD2L1,ESPL1
GO:BP	negative regulation of sister chromatid segregation	GO:0033046	1.25546e-05	8	AURKB,NDC80,BUB1,CENPF,CDC20,KNTC1,GEN1,MAD2L1
GO:BP	negative regulation of mitotic sister chromatid segregation	GO:0033048	1.25546e-05	8	AURKB,NDC80,BUB1,CENPF,CDC20,KNTC1,GEN1,MAD2L1
GO:BP	negative regulation of mitotic sister chromatid separation	GO:2000816	1.25546e-05	8	AURKB,NDC80,BUB1,CENPF,CDC20,KNTC1,GEN1,MAD2L1
GO:BP	negative regulation of metaphase/anaphase transition of cell cycle	GO:1902100	1.25546e-05	8	AURKB,NDC80,BUB1,CENPF,CDC20,KNTC1,GEN1,MAD2L1
GO:BP	mitotic cell cycle process	GO:1903047	1.50513e-05	16	CYP1A1,FOXM1,AURKB,CEP55,KIF4A,CDCA8,MKI67,CDCA5,KIF18B,IQGAP3,EDN3,NDC80,CENPA,CENPE,BUB1,UBE2C
GO:BP	positive regulation of cell adhesion	GO:0045785	1.68077e-05	25	PCK1,VTCN1,CD74,CD55,PDCD1LG2,NDNF,AIF1,NCKAP1L,NLRP3,MDK,MYOC,COL16A1,EPB41L5,CD86,CCL21,ITGB2,IGF1,CCDC80,ABI3BP,AGER,THY1,PTN,IL18,ECM2,SOX12
GO:BP	positive regulation of neutrophil chemotaxis	GO:0090023	1.68077e-05	6	C3AR1,CD74,NCKAP1L,MDK,C5AR1,CCL21
GO:BP	negative regulation of chromosome separation	GO:1905819	1.74767e-05	8	AURKB,NDC80,BUB1,CENPF,CDC20,KNTC1,GEN1,MAD2L1
GO:BP	negative regulation of chromosome segregation	GO:0051985	1.74767e-05	8	AURKB,NDC80,BUB1,CENPF,CDC20,KNTC1,GEN1,MAD2L1
GO:BP	negative regulation of multicellular organismal process	GO:0051241	1.83171e-05	45	CXCL10,ISG15,C1QC,ABCC8,DDX58,PLAC8,CD74,SLC11A1,SERPINF1,VSIG4,PDCD1LG2,DHX58,CD84,RBP4,CD200R1,NCKAP1L,NLRP3,ROBO2,DCN,MAP2K6,MDK,FAP,GHSR,SPI1,ANGPT4,C5AR2,UBA7,SLAMF8,PDGFRA,WNK4,TYROBP,NGFR,BANK1,IGF1,HERC5,BTK,LOXL3,CX3CR1,ABI3BP,AGER,CLEC4A,THY1,PTN,ZFPM2,SORL1
GO:BP	metaphase plate congression	GO:0051310	1.92424e-05	6	AURKB,CDCA8,CDCA5,NDC80,CENPE,CENPF
GO:BP	regulation of mitotic sister chromatid segregation	GO:0033047	2.03885e-05	8	AURKB,NDC80,BUB1,CENPF,CDC20,KNTC1,GEN1,MAD2L1
GO:BP	cell division	GO:0051301	2.49682e-05	14	AURKB,CEP55,KIF4A,ASPM,CDCA8,CDCA5,KIF18B,NDC80,CENPA,CENPE,BUB1,UBE2C,TOP2A,CENPF
GO:BP	negative regulation of cytokine production	GO:0001818	2.6125e-05	21	ISG15,DDX58,SLC11A1,VSIG4,PDCD1LG2,DHX58,CD84,CD200R1,NCKAP1L,NLRP3,GHSR,C5AR2,UBA7,TYROBP,BANK1,IGF1,HERC5,BTK,CX3CR1,AGER,CLEC4A
GO:BP	cell communication	GO:0007154	2.82294e-05	161	CXCL10,IFI6,MX1,ISG15,FOXM1,AURKB,IFIT1,C3AR1,FCGR3A,PCK1,CEP55,CD22,ASPM,C1QA,ZBP1,SCN7A,COL1A2,VTCN1,CD2,LY86,ABCC8,IQGAP3,DDX58,EDN3,COL1A1,SHISA3,RTKN2,CD74,NDC80,RSAD2,CD55,XAF1,GPBAR1,BUB1,SFRP4,PDCD1LG2,CPZ,FGD2,IFIT3,CD180,COL3A1,NDNF,CENPF,XCR1,DHX58,FAM83E,FMOD,TMEM108,RBP4,MILR1,G0S2,ANGPTL1,MMP9,CNTNAP2,DKK2,LPXN,CIITA,PDGFRL,CDC20,TAFA3,AIF1,RNF213,KNTC1,RGS18,CD200R1,NCKAP1L,NLRP3,P…
GO:BP	mitotic spindle organization	GO:0007052	2.92811e-05	10	AURKB,KIF4A,CDCA8,NDC80,CENPA,CENPE,BUB1,CENPF,CDC20,KNTC1
GO:BP	cell cycle process	GO:0022402	3.00837e-05	19	CYP1A1,PCLAF,FOXM1,AURKB,CEP55,KIF4A,ASPM,CDCA8,MKI67,CDCA5,KIF18B,IQGAP3,EDN3,NDC80,CENPA,CENPE,BUB1,UBE2C,TOP2A
GO:BP	mitotic metaphase plate congression	GO:0007080	3.00837e-05	5	AURKB,CDCA8,CDCA5,NDC80,CENPE
GO:BP	positive regulation of immune effector process	GO:0002699	3.00837e-05	15	PCK1,DDX58,CD74,RSAD2,CD55,DHX58,CD84,RBP4,NLRP3,CLEC7A,SPI1,CD86,TYROBP,ITGB2,BTK
GO:BP	negative regulation of mitotic nuclear division	GO:0045839	3.12333e-05	8	AURKB,NDC80,BUB1,CENPF,CDC20,KNTC1,GEN1,MAD2L1
GO:BP	positive regulation of granulocyte chemotaxis	GO:0071624	3.12333e-05	6	C3AR1,CD74,NCKAP1L,MDK,C5AR1,CCL21
GO:BP	regulation of humoral immune response	GO:0002920	3.12333e-05	7	C3AR1,C2,C1QC,C1QA,CD55,VSIG4,C1S
GO:BP	cell migration	GO:0016477	3.12333e-05	61	CXCL10,C3AR1,ASPM,COL1A2,CD2,ABCC8,DDX58,EDN3,COL1A1,CD74,SERPINF1,COL3A1,NDNF,XCR1,CD84,MMP9,LPXN,AIF1,FAT3,CD200R1,NCKAP1L,NLRP3,SRGAP3,DCN,ACKR4,MDK,TSPAN11,MYOC,FAP,CLEC7A,CCR5,SELPLG,EPB41L5,SPI1,ANGPT4,NTRK2,C5AR2,CSF1R,SLAMF8,PDGFRA,C5AR1,CCL21,ITGB2,IGSF10,IGF1,PLP1,CX3CR1,JAML,IGFBP6,AGER,EFS,FCER1G,THY1,PTN,SPEF1,SORL1,ANLN,ITGAX,ATRNL1,KNSTRN,ARHGEF39
GO:BP	myeloid leukocyte mediated immunity	GO:0002444	3.2037e-05	29	C3AR1,DDX58,PLAC8,CD55,SLC11A1,CD84,MILR1,MMP9,LAIR1,NCKAP1L,NFAM1,PIGR,CD53,SPI1,C5AR1,ADA2,TYROBP,LAT2,ITGB2,BTK,GHDC,TCN1,CRISPLD2,FCER1G,CTSZ,CTSS,ITGAX,PTGDS,ATP8B4
GO:BP	regulation of T cell activation	GO:0050863	3.3127e-05	21	PCK1,VTCN1,CD2,CD74,CD55,VSIG4,PDCD1LG2,AIF1,NCKAP1L,NLRP3,TNFAIP8L2,MDK,CD86,SIT1,CCL21,IGF1,LOXL3,AGER,THY1,IL18,SOX12
GO:BP	collagen fibril organization	GO:0030199	3.31803e-05	12	COL1A2,COL1A1,COL23A1,COL3A1,LUM,FMOD,COL16A1,COL24A1,COL4A6,LOXL3,COL7A1,COL4A5
GO:BP	positive regulation of chemotaxis	GO:0050921	3.45124e-05	13	CXCL10,C3AR1,EDN3,CD74,AIF1,NCKAP1L,MDK,SPI1,CSF1R,C5AR1,CCL21,AGER,PTN
GO:BP	signaling	GO:0023052	3.52124e-05	160	CXCL10,IFI6,MX1,ISG15,FOXM1,AURKB,IFIT1,C3AR1,FCGR3A,PCK1,CEP55,CD22,ASPM,C1QA,ZBP1,SCN7A,COL1A2,VTCN1,CD2,LY86,ABCC8,IQGAP3,DDX58,EDN3,COL1A1,SHISA3,RTKN2,CD74,NDC80,RSAD2,CD55,XAF1,GPBAR1,BUB1,SFRP4,PDCD1LG2,CPZ,FGD2,IFIT3,CD180,COL3A1,NDNF,CENPF,XCR1,DHX58,FAM83E,FMOD,TMEM108,RBP4,MILR1,G0S2,ANGPTL1,MMP9,CNTNAP2,DKK2,LPXN,CIITA,PDGFRL,CDC20,TAFA3,AIF1,RNF213,KNTC1,RGS18,CD200R1,NCKAP1L,NLRP3,P…
GO:BP	positive regulation of response to external stimulus	GO:0032103	3.72508e-05	26	CXCL10,C3AR1,ZBP1,LY86,EDN3,CD74,CD180,DHX58,TAFA3,AIF1,NCKAP1L,MDK,GHSR,ALOX5AP,SPI1,CSF1R,C5AR1,TYROBP,CCL21,BTK,NLRC4,AGER,CLEC4A,FCER1G,PTN,IL18
GO:BP	spindle organization	GO:0007051	4.23061e-05	11	AURKB,KIF4A,ASPM,CDCA8,NDC80,CENPA,CENPE,BUB1,CENPF,CDC20,KNTC1
GO:BP	leukocyte cell-cell adhesion	GO:0007159	4.23061e-05	22	PCK1,VTCN1,CD74,CD55,VSIG4,PDCD1LG2,AIF1,NCKAP1L,NLRP3,TNFAIP8L2,MDK,SELPLG,CD86,CCL21,ITGB2,IGF1,LOXL3,CX3CR1,AGER,THY1,IL18,SOX12
GO:BP	response to lipopolysaccharide	GO:0032496	4.29101e-05	17	CYP1A1,CXCL10,PCK1,LY86,ABCC8,CD55,SLC11A1,PDCD1LG2,CD180,NLRP3,DCN,CCR5,GHSR,SPI1,CD86,C5AR1,HPGD
GO:BP	positive regulation of neutrophil migration	GO:1902624	4.46838e-05	6	C3AR1,CD74,NCKAP1L,MDK,C5AR1,CCL21
GO:BP	leukocyte degranulation	GO:0043299	4.50605e-05	28	C3AR1,PLAC8,CD55,SLC11A1,CD84,MILR1,MMP9,LAIR1,NCKAP1L,NFAM1,PIGR,CD53,SPI1,C5AR1,ADA2,TYROBP,LAT2,ITGB2,BTK,GHDC,TCN1,CRISPLD2,FCER1G,CTSZ,CTSS,ITGAX,PTGDS,ATP8B4
GO:BP	movement of cell or subcellular component	GO:0006928	4.70682e-05	65	CXCL10,C3AR1,KIF4A,ASPM,COL1A2,KIF18B,CD2,ABCC8,DDX58,EDN3,COL1A1,CD74,SERPINF1,CENPE,COL3A1,NDNF,XCR1,CD84,TMEM108,MMP9,KIF15,LPXN,AIF1,FAT3,CD200R1,NCKAP1L,NLRP3,SRGAP3,ROBO2,DCN,ACKR4,KIFC1,MDK,TSPAN11,MYOC,FAP,TPPP2,CLEC7A,CCR5,SELPLG,EPB41L5,SPI1,ANGPT4,NTRK2,C5AR2,KIF20A,CSF1R,SLAMF8,PDGFRA,C5AR1,CFAP70,CCL21,NGFR,WAS,ITGB2,IGSF10,IGF1,PLP1,CX3CR1,JAML,IGFBP6,DDX4,AGER,EFS,FCER1G
GO:BP	regulation of mononuclear cell migration	GO:0071675	4.83815e-05	10	CXCL10,C3AR1,AIF1,CD200R1,MDK,SPI1,CSF1R,SLAMF8,C5AR1,CCL21
GO:BP	localization of cell	GO:0051674	5.48273e-05	55	CXCL10,C3AR1,ASPM,COL1A2,CD2,ABCC8,DDX58,EDN3,COL1A1,CD74,SERPINF1,COL3A1,NDNF,XCR1,CD84,MMP9,LPXN,AIF1,FAT3,CD200R1,NCKAP1L,NLRP3,SRGAP3,DCN,ACKR4,MDK,TSPAN11,MYOC,FAP,TPPP2,CLEC7A,CCR5,SELPLG,EPB41L5,SPI1,ANGPT4,NTRK2,C5AR2,CSF1R,SLAMF8,PDGFRA,C5AR1,CCL21,WAS,ITGB2,IGSF10,IGF1,PLP1,CX3CR1,JAML,IGFBP6,DDX4,AGER,EFS,FCER1G
GO:BP	cell population proliferation	GO:0008283	5.48273e-05	22	CYP1A1,CXCL10,FOXM1,AURKB,CD22,ASPM,MKI67,VTCN1,ABCC8,IQGAP3,EDN3,PLAC8,RTKN2,CD74,CD55,SLC11A1,SERPINF1,GPBAR1,VSIG4,BUB1,SFRP4,PDCD1LG2
GO:BP	cell motility	GO:0048870	5.48273e-05	55	CXCL10,C3AR1,ASPM,COL1A2,CD2,ABCC8,DDX58,EDN3,COL1A1,CD74,SERPINF1,COL3A1,NDNF,XCR1,CD84,MMP9,LPXN,AIF1,FAT3,CD200R1,NCKAP1L,NLRP3,SRGAP3,DCN,ACKR4,MDK,TSPAN11,MYOC,FAP,TPPP2,CLEC7A,CCR5,SELPLG,EPB41L5,SPI1,ANGPT4,NTRK2,C5AR2,CSF1R,SLAMF8,PDGFRA,C5AR1,CCL21,WAS,ITGB2,IGSF10,IGF1,PLP1,CX3CR1,JAML,IGFBP6,DDX4,AGER,EFS,FCER1G
GO:BP	microtubule cytoskeleton organization involved in mitosis	GO:1902850	5.8946e-05	10	AURKB,KIF4A,CDCA8,NDC80,CENPA,CENPE,BUB1,CENPF,CDC20,KNTC1
GO:BP	cell-cell adhesion	GO:0098609	5.9221e-05	38	PCK1,VTCN1,CD2,CD74,CD55,VSIG4,PDCD1LG2,CD84,MILR1,AIF1,FAT3,CD200R1,NCKAP1L,NLRP3,SIGLEC1,TNFAIP8L2,ROBO2,MDK,CLSTN3,SELPLG,EPB41L5,SPI1,CD86,PDGFRA,CCL21,ITGB2,IGF1,LOXL3,CX3CR1,JAML,VSIG10,AGER,LRRC4,THY1,IL18,SOX12,ITGAX,PTPRD
GO:BP	positive regulation of leukocyte cell-cell adhesion	GO:1903039	5.95992e-05	17	PCK1,VTCN1,CD74,CD55,PDCD1LG2,AIF1,NCKAP1L,NLRP3,MDK,CD86,CCL21,ITGB2,IGF1,AGER,THY1,IL18,SOX12
GO:BP	establishment of chromosome localization	GO:0051303	5.95992e-05	6	AURKB,CDCA8,CDCA5,NDC80,CENPE,CENPF
GO:BP	humoral immune response	GO:0006959	5.95992e-05	10	CXCL10,C3AR1,C2,C1QC,C1QA,CD55,SLC11A1,RNASE6,VSIG4,C1S
GO:BP	chromosome localization	GO:0050000	6.68227e-05	6	AURKB,CDCA8,CDCA5,NDC80,CENPE,CENPF
GO:BP	negative regulation of nuclear division	GO:0051784	6.68227e-05	6	AURKB,NDC80,BUB1,CENPF,CDC20,KNTC1
GO:BP	mitotic cell cycle	GO:0000278	6.68706e-05	16	CYP1A1,FOXM1,AURKB,CEP55,KIF4A,CDCA8,MKI67,CDCA5,KIF18B,IQGAP3,EDN3,NDC80,CENPA,CENPE,BUB1,UBE2C
GO:BP	myeloid cell activation involved in immune response	GO:0002275	6.7148e-05	28	C3AR1,PLAC8,CD55,SLC11A1,CD84,MILR1,MMP9,LAIR1,NCKAP1L,NFAM1,PIGR,CD53,SPI1,C5AR1,ADA2,TYROBP,LAT2,ITGB2,BTK,GHDC,TCN1,CRISPLD2,FCER1G,CTSZ,CTSS,ITGAX,PTGDS,ATP8B4
GO:BP	positive regulation of T cell activation	GO:0050870	7.47716e-05	16	PCK1,VTCN1,CD74,CD55,PDCD1LG2,AIF1,NCKAP1L,NLRP3,MDK,CD86,CCL21,IGF1,AGER,THY1,IL18,SOX12
GO:BP	negative regulation of chromosome organization	GO:2001251	7.67884e-05	10	AURKB,NDC80,BUB1,TOP2A,CENPF,CDC20,KNTC1,GEN1,MAD2L1,ESPL1
GO:BP	positive regulation of cell junction assembly	GO:1901890	8.0209e-05	12	CNTNAP2,MYOC,CLSTN3,SLITRK6,COL16A1,EPB41L5,NTRK2,SLITRK5,AGRN,THY1,PTPRD,NPHP1
GO:BP	regulation of nuclear division	GO:0051783	8.0209e-05	12	AURKB,MKI67,EDN3,NDC80,BUB1,CENPF,CDC20,KNTC1,IGF1,GEN1,MAD2L1,ESPL1
GO:BP	regulation of macrophage migration	GO:1905521	8.03807e-05	7	C3AR1,CD200R1,MDK,CSF1R,SLAMF8,C5AR1,CX3CR1
GO:BP	response to molecule of bacterial origin	GO:0002237	8.95319e-05	17	CYP1A1,CXCL10,PCK1,LY86,ABCC8,CD55,SLC11A1,PDCD1LG2,CD180,NLRP3,DCN,CCR5,GHSR,SPI1,CD86,C5AR1,HPGD
GO:BP	kinetochore organization	GO:0051383	9.95567e-05	4	NDC80,CENPA,CENPE,CENPF
GO:BP	negative regulation of lymphocyte activation	GO:0051250	0.000101052	12	VTCN1,CD74,VSIG4,PDCD1LG2,TNFAIP8L2,MDK,CD86,TYROBP,BANK1,LST1,BTK,LOXL3
GO:BP	regulation of leukocyte cell-cell adhesion	GO:1903037	0.000101957	20	PCK1,VTCN1,CD74,CD55,VSIG4,PDCD1LG2,AIF1,NCKAP1L,NLRP3,TNFAIP8L2,MDK,CD86,CCL21,ITGB2,IGF1,LOXL3,AGER,THY1,IL18,SOX12
GO:BP	negative regulation of viral genome replication	GO:0045071	0.00010977	3	MX1,ISG15,IFIT1
GO:BP	locomotion	GO:0040011	0.000111626	58	CXCL10,C3AR1,ASPM,COL1A2,CD2,ABCC8,DDX58,EDN3,COL1A1,CD74,SERPINF1,COL3A1,NDNF,XCR1,CD84,MMP9,LPXN,AIF1,FAT3,CD200R1,NCKAP1L,NLRP3,SRGAP3,ROBO2,DCN,ACKR4,MDK,TSPAN11,MYOC,FAP,TPPP2,CLEC7A,CCR5,SELPLG,GHSR,EPB41L5,SPI1,ANGPT4,NTRK2,C5AR2,CSF1R,SLAMF8,PDGFRA,C5AR1,CCL21,NGFR,WAS,ITGB2,IGSF10,IGF1,PLP1,CX3CR1,JAML,IGFBP6,DDX4,AGER,EFS,FCER1G
GO:BP	positive regulation of biological process	GO:0048518	0.000116658	155	CYP1A1,CXCL10,ISG15,FOXM1,AURKB,IFIT1,C3AR1,FCGR3A,PCK1,CD22,C2,ASPM,C1QC,CDCA5,C1QA,ZBP1,VTCN1,CD2,LY86,ABCC8,IQGAP3,DDX58,EDN3,PLAC8,COL1A1,RTKN2,CD74,NDC80,RSAD2,CD55,SLC11A1,SERPINF1,GPBAR1,CENPE,VSIG4,SFRP4,PDCD1LG2,UBE2C,C1S,TOP2A,FGD2,CD180,COL3A1,NDNF,LUM,DHX58,CD84,TMEM108,RBP4,G0S2,MMP9,CNTNAP2,DKK2,LPXN,CIITA,CDC20,TAFA3,AIF1,C1R,NCKAP1L,NLRP3,AZIN2,NFAM1,ROBO2,ASB9,DCN,CIT,NLRP1,TNFSF…
GO:BP	positive regulation of developmental process	GO:0051094	0.000130242	49	ISG15,C3AR1,PCK1,ASPM,IQGAP3,EDN3,COL1A1,CD74,SERPINF1,SFRP4,CDC20,NCKAP1L,NLRP3,ROBO2,DCN,MDK,MYOC,CLSTN3,ZNF365,SCIN,EVI2B,CLEC7A,SLITRK6,ITPKA,GHSR,CD53,ANGPT4,NTRK2,CD86,C5AR1,TYROBP,RANBP3L,NGFR,SLITRK5,ITGB2,IGF1,BTK,CX3CR1,ABI3BP,AGER,AGRN,BASP1,PTN,IL18,ZFPM2,SORL1,SOX12,ITGAX,PTPRD
GO:BP	complement activation	GO:0006956	0.000138488	12	C3AR1,C2,C1QC,C1QA,CD55,VSIG4,C1S,C1R,C5AR2,MFAP4,C5AR1,C7
GO:BP	detection of biotic stimulus	GO:0009595	0.000148723	7	NAIP,NLRP3,FAP,CLEC7A,SRPX,NLRC4,TLR1
GO:BP	negative regulation of response to external stimulus	GO:0032102	0.000152082	21	ISG15,FCGR3A,ABCC8,SERPINF1,GPBAR1,VSIG4,DHX58,TAFA3,AIF1,CD200R1,NLRP3,TNFAIP8L2,ROBO2,MDK,FAP,GHSR,FCGR1A,RTN4RL1,C5AR2,SLAMF8,PDGFRA
GO:BP	positive regulation of leukocyte activation	GO:0002696	0.000153869	22	PCK1,VTCN1,CD2,CD74,CD55,PDCD1LG2,TAFA3,AIF1,NCKAP1L,NLRP3,MDK,CLEC7A,CD86,TYROBP,CCL21,ITGB2,IGF1,BTK,AGER,THY1,IL18,SOX12
GO:BP	positive regulation of myeloid leukocyte mediated immunity	GO:0002888	0.000155951	5	DDX58,SPI1,TYROBP,ITGB2,BTK
GO:BP	regulation of tumor necrosis factor superfamily cytokine production	GO:1903555	0.000179739	16	CD2,ABCC8,DDX58,CLEC7A,GHSR,CD86,C5AR2,TYROBP,IGF1,CX3CR1,AGER,CLEC4A,TLR1,ARRB2,CYBB,TWIST1
GO:BP	tumor necrosis factor superfamily cytokine production	GO:0071706	0.000179739	16	CD2,ABCC8,DDX58,CLEC7A,GHSR,CD86,C5AR2,TYROBP,IGF1,CX3CR1,AGER,CLEC4A,TLR1,ARRB2,CYBB,TWIST1
GO:BP	synapse organization	GO:0050808	0.000180074	23	C1QC,C1QA,C1QL3,TMEM108,CDC20,ROBO2,CLSTN3,ARHGAP33,ZNF365,SLITRK6,ITPKA,GHSR,NTRK2,C5AR1,SLITRK5,PPFIA3,CX3CR1,AGRN,LRRC4,PTN,PPFIA4,COL4A5,PTPRD
GO:BP	macrophage activation	GO:0042116	0.000197328	10	C1QA,CD74,SLC11A1,VSIG4,TAFA3,AIF1,C5AR1,TYROBP,ITGB2,AGER
GO:BP	regulation of multicellular organismal development	GO:2000026	0.000201513	51	CXCL10,ISG15,C3AR1,PCK1,ASPM,C1QC,CD2,ABCC8,CD74,SERPINF1,SFRP4,RBP4,MMP9,NCKAP1L,NLRP3,NFAM1,ROBO2,DCN,MDK,CLSTN3,ZNF365,SCIN,EVI2B,SLITRK6,ITPKA,GHSR,SPI1,ANGPT4,NTRK2,CD86,SLAMF8,C5AR1,TYROBP,NGFR,SLITRK5,ITGB2,IGF1,BTK,LOXL3,CX3CR1,AGER,AGRN,BASP1,THY1,PTN,IL18,ZFPM2,SORL1,SOX12,ITGAX,PTPRD
GO:BP	cellular response to chemical stimulus	GO:0070887	0.000212944	73	CYP1A1,GLYAT,CXCL10,IFI6,MX1,ISG15,IFIT1,C3AR1,PCK1,ZBP1,COL1A2,LY86,ABCC8,IQGAP3,DDX58,EDN3,COL1A1,CD74,RSAD2,CD55,XAF1,SERPINF1,GPBAR1,SFRP4,PDCD1LG2,IFIT3,CD180,COL3A1,NDNF,XCR1,FMOD,TMEM108,MMP9,LPXN,CIITA,AIF1,NCKAP1L,NLRP3,ROBO2,DCN,MAP2K6,ACKR4,FOLR2,MDK,CLEC7A,COL16A1,CCR5,SELPLG,GHSR,F13A1,ALOX5AP,EPB41L5,SPI1,FCGR1A,ANGPT4,NTRK2,CD86,C5AR2,ADAM23,CSF1R,SLAMF8,PDGFRA,C5AR1,CCL21,NGFR,HPG…
GO:BP	signal transduction	GO:0007165	0.000212944	147	CXCL10,IFI6,MX1,ISG15,FOXM1,AURKB,IFIT1,C3AR1,FCGR3A,PCK1,CEP55,CD22,ASPM,ZBP1,COL1A2,VTCN1,CD2,LY86,IQGAP3,DDX58,EDN3,COL1A1,SHISA3,RTKN2,CD74,NDC80,RSAD2,CD55,XAF1,GPBAR1,BUB1,SFRP4,PDCD1LG2,CPZ,FGD2,IFIT3,CD180,COL3A1,NDNF,CENPF,XCR1,DHX58,FAM83E,FMOD,TMEM108,MILR1,G0S2,ANGPTL1,MMP9,DKK2,LPXN,CIITA,PDGFRL,CDC20,TAFA3,AIF1,RNF213,KNTC1,RGS18,CD200R1,NCKAP1L,NLRP3,PILRA,SRGAP3,NFAM1,ROBO2,ASB9,D…
GO:BP	regulation of leukocyte proliferation	GO:0070663	0.000222441	16	CD22,VTCN1,CD74,CD55,VSIG4,PDCD1LG2,AIF1,NCKAP1L,CD86,CSF1R,TYROBP,IGF1,LST1,BTK,AGER,IL18
GO:BP	positive regulation of type 2 immune response	GO:0002830	0.000223523	5	CD74,RSAD2,NLRP3,CD86,IL18
GO:BP	positive regulation of cell activation	GO:0050867	0.000226823	22	PCK1,VTCN1,CD2,CD74,CD55,PDCD1LG2,TAFA3,AIF1,NCKAP1L,NLRP3,MDK,CLEC7A,CD86,TYROBP,CCL21,ITGB2,IGF1,BTK,AGER,THY1,IL18,SOX12
GO:BP	response to organic substance	GO:0010033	0.000240121	73	CYP1A1,CXCL10,IFI6,MX1,ISG15,IFIT1,PCK1,ZBP1,COL1A2,LY86,ABCC8,IQGAP3,DDX58,COL1A1,CD74,RSAD2,CD55,SLC11A1,XAF1,SERPINF1,GPBAR1,SFRP4,PDCD1LG2,IFIT3,CD180,COL3A1,NDNF,XCR1,LUM,FMOD,TMEM108,MXRA5,RBP4,MMP9,LPXN,CIITA,AIF1,NLRP3,ROBO2,DCN,NLRP1,HNMT,TNFSF10,MAP2K6,ACKR4,FOLR2,MDK,CLEC7A,COL16A1,CCR5,SELPLG,NNMT,GHSR,F13A1,EPB41L5,SPI1,FCGR1A,NTRK2,CD86,ADAM23,CSF1R,PDGFRA,C5AR1,CCL21,NGFR,HPGD,IRF9…
GO:BP	regulation of locomotion	GO:0040012	0.000240121	34	CXCL10,C3AR1,ABCC8,DDX58,EDN3,COL1A1,CD74,SERPINF1,COL3A1,MMP9,AIF1,CD200R1,NCKAP1L,SRGAP3,ROBO2,DCN,MDK,MYOC,TPPP2,CLEC7A,GHSR,EPB41L5,SPI1,ANGPT4,C5AR2,CSF1R,SLAMF8,PDGFRA,C5AR1,CCL21,WAS,IGSF10,IGF1,PLP1
GO:BP	mononuclear cell migration	GO:0071674	0.000244232	13	CXCL10,C3AR1,AIF1,CD200R1,MDK,CCR5,SPI1,CSF1R,SLAMF8,C5AR1,CCL21,JAML,AGER
GO:BP	cell junction organization	GO:0034330	0.000244283	35	C1QC,C1QA,ABCC8,C1QL3,GPBAR1,TMEM108,CNTNAP2,CDC20,ROBO2,MYOC,CLSTN3,ARHGAP33,ZNF365,SLITRK6,COL16A1,ITPKA,GHSR,EPB41L5,NTRK2,CSF1R,C5AR1,SLITRK5,PPFIA3,CX3CR1,AGRN,LRRC4,THY1,PTN,PPFIA4,COL4A5,PTPRD,CDH15,PARD6G,APBB2,NPHP1
GO:BP	microglial cell activation	GO:0001774	0.000251432	8	C1QA,TAFA3,AIF1,C5AR1,TYROBP,ITGB2,AGER,TLR1
GO:BP	cell junction disassembly	GO:0150146	0.0002603	3	C1QC,C1QA,ABCC8
GO:BP	positive regulation of cell-substrate adhesion	GO:0010811	0.000294341	12	NDNF,MDK,MYOC,COL16A1,EPB41L5,CCL21,CCDC80,ABI3BP,THY1,PTN,ECM2,NPNT
GO:BP	regulation of lymphocyte proliferation	GO:0050670	0.000312617	15	CD22,VTCN1,CD74,CD55,VSIG4,PDCD1LG2,AIF1,NCKAP1L,CD86,TYROBP,IGF1,LST1,BTK,AGER,IL18
GO:BP	leukocyte proliferation	GO:0070661	0.00031992	17	CD22,VTCN1,CD74,CD55,SLC11A1,VSIG4,PDCD1LG2,CD180,AIF1,NCKAP1L,CD86,CSF1R,TYROBP,IGF1,LST1,BTK,AGER
GO:BP	lateral attachment of mitotic spindle microtubules to kinetochore	GO:0099607	0.000320223	2	AURKB,CENPE
GO:BP	positive regulation of cell population proliferation	GO:0008284	0.000329302	38	CXCL10,FOXM1,ASPM,VTCN1,IQGAP3,EDN3,PLAC8,RTKN2,CD74,CD55,GPBAR1,PDCD1LG2,MMP9,CDC20,AIF1,NCKAP1L,FOLR2,MDK,CLEC7A,GHSR,NTRK2,CD86,C5AR2,CSF1R,PDGFRA,C5AR1,NGFR,HPGD,IGF1,CX3CR1,JAML,AGER,CLEC11A,PTN,IL18,ZFPM2,CTSZ,ITGAX
GO:BP	regulation of viral genome replication	GO:0045069	0.000330879	3	MX1,ISG15,IFIT1
GO:BP	response to cytokine	GO:0034097	0.000331452	14	CXCL10,IFI6,MX1,ISG15,IFIT1,PCK1,ZBP1,COL1A2,DDX58,COL1A1,CD74,RSAD2,SLC11A1,XAF1
GO:BP	regulation of mononuclear cell proliferation	GO:0032944	0.000333369	15	CD22,VTCN1,CD74,CD55,VSIG4,PDCD1LG2,AIF1,NCKAP1L,CD86,TYROBP,IGF1,LST1,BTK,AGER,IL18
GO:BP	regulation of cell adhesion	GO:0030155	0.000333369	31	PCK1,VTCN1,COL1A1,CD74,CD55,VSIG4,PDCD1LG2,NDNF,LPXN,AIF1,NCKAP1L,NLRP3,TNFAIP8L2,MDK,MYOC,COL16A1,EPB41L5,SPI1,CD86,CCL21,ITGB2,IGF1,CCDC80,LOXL3,ABI3BP,AGER,THY1,PTN,IL18,ECM2,SOX12
GO:BP	respiratory burst	GO:0045730	0.000333369	7	CD55,SLC11A1,CLEC7A,SLAMF8,NCF4,NCF2,CYBB
GO:BP	lymphocyte proliferation	GO:0046651	0.000344752	16	CD22,VTCN1,CD74,CD55,SLC11A1,VSIG4,PDCD1LG2,CD180,AIF1,NCKAP1L,CD86,TYROBP,IGF1,LST1,BTK,AGER
GO:BP	positive regulation of signal transduction	GO:0009967	0.000383643	48	ASPM,ZBP1,LY86,IQGAP3,EDN3,COL1A1,RTKN2,CD74,NDC80,RSAD2,GPBAR1,SFRP4,FGD2,CD180,COL3A1,DHX58,TMEM108,G0S2,MMP9,DKK2,NFAM1,ROBO2,DCN,TNFSF10,MAP2K6,MYOC,CLEC7A,GHSR,SPI1,NTRK2,CD86,C5AR2,CSF1R,PDGFRA,C5AR1,CCL21,NGFR,BANK1,IGF1,SRPX,HCST,GEN1,LOXL3,CX3CR1,IGFBP6,AGER,MAD2L1,EIF2AK2
GO:BP	regulated exocytosis	GO:0045055	0.000383643	33	C3AR1,PLAC8,CD55,SLC11A1,CD84,MILR1,MMP9,LAIR1,NCKAP1L,NFAM1,SCIN,PIGR,F13A1,CD53,SPI1,C5AR1,ADA2,TYROBP,LAT2,PPFIA3,ITGB2,IGF1,BTK,GHDC,TCN1,CRISPLD2,FCER1G,CTSZ,CTSS,SYNGR3,ITGAX,PTGDS,ATP8B4
GO:BP	mononuclear cell proliferation	GO:0032943	0.000383643	16	CD22,VTCN1,CD74,CD55,SLC11A1,VSIG4,PDCD1LG2,CD180,AIF1,NCKAP1L,CD86,TYROBP,IGF1,LST1,BTK,AGER
GO:BP	positive regulation of cell-cell adhesion	GO:0022409	0.000383643	17	PCK1,VTCN1,CD74,CD55,PDCD1LG2,AIF1,NCKAP1L,NLRP3,MDK,CD86,CCL21,ITGB2,IGF1,AGER,THY1,IL18,SOX12
GO:BP	regulation of cellular component organization	GO:0051128	0.000396161	54	CXCL10,FOXM1,AURKB,CD22,MKI67,CDCA5,ABCC8,IQGAP3,EDN3,NDC80,SERPINF1,C1QL3,GPBAR1,CENPE,BUB1,SFRP4,UBE2C,TOP2A,NDNF,CENPF,MMP9,CNTNAP2,CDC20,FAT3,KNTC1,NCKAP1L,ROBO2,DCN,TNFSF10,MDK,MYOC,CLSTN3,ARHGAP33,ZNF365,SCIN,FAP,TPPP2,CLEC7A,SLITRK6,COL16A1,ITPKA,GHSR,EPB41L5,CD53,SPI1,NTRK2,RTN4RL1,CSF1R,PDGFRA,TYROBP,CCL21,NGFR,SLITRK5,WAS
GO:BP	cellular extravasation	GO:0045123	0.000398181	8	MDK,SELPLG,CCL21,ITGB2,CX3CR1,JAML,AGER,THY1
GO:BP	cellular response to organic substance	GO:0071310	0.000401916	62	CYP1A1,CXCL10,IFI6,MX1,ISG15,IFIT1,PCK1,ZBP1,COL1A2,LY86,ABCC8,IQGAP3,DDX58,COL1A1,CD74,RSAD2,CD55,XAF1,SERPINF1,GPBAR1,SFRP4,PDCD1LG2,IFIT3,CD180,COL3A1,NDNF,XCR1,FMOD,TMEM108,MMP9,LPXN,CIITA,AIF1,NLRP3,ROBO2,DCN,MAP2K6,ACKR4,FOLR2,CLEC7A,COL16A1,CCR5,SELPLG,GHSR,F13A1,EPB41L5,SPI1,FCGR1A,NTRK2,CD86,ADAM23,CSF1R,PDGFRA,CCL21,NGFR,HPGD,IRF9,WAS,COL4A6,P2RY13,ITGB2,IGF1
GO:BP	regulation of macrophage chemotaxis	GO:0010758	0.000403417	5	C3AR1,MDK,CSF1R,SLAMF8,C5AR1
GO:BP	macrophage migration	GO:1905517	0.000415477	7	C3AR1,CD200R1,MDK,CSF1R,SLAMF8,C5AR1,CX3CR1
GO:BP	regulation of leukocyte differentiation	GO:1902105	0.000415477	18	PCK1,C1QC,CD2,CD74,NCKAP1L,NLRP3,NFAM1,MDK,EVI2B,CD86,SLAMF8,TYROBP,BTK,LOXL3,AGER,IL18,SOX12,LRRC17
GO:BP	attachment of mitotic spindle microtubules to kinetochore	GO:0051315	0.000415477	3	AURKB,NDC80,CENPE
GO:BP	leukocyte migration involved in inflammatory response	GO:0002523	0.000415477	5	NLRP3,MDK,SLAMF8,ITGB2,PTN
GO:BP	tumor necrosis factor production	GO:0032640	0.000444146	15	CD2,ABCC8,DDX58,CLEC7A,GHSR,C5AR2,TYROBP,IGF1,CX3CR1,AGER,CLEC4A,TLR1,ARRB2,CYBB,TWIST1
GO:BP	regulation of tumor necrosis factor production	GO:0032680	0.000444146	15	CD2,ABCC8,DDX58,CLEC7A,GHSR,C5AR2,TYROBP,IGF1,CX3CR1,AGER,CLEC4A,TLR1,ARRB2,CYBB,TWIST1
GO:BP	regulation of cell-cell adhesion	GO:0022407	0.000445696	22	PCK1,VTCN1,CD74,CD55,VSIG4,PDCD1LG2,AIF1,NCKAP1L,NLRP3,TNFAIP8L2,MDK,EPB41L5,SPI1,CD86,CCL21,ITGB2,IGF1,LOXL3,AGER,THY1,IL18,SOX12
GO:BP	regulation of cell population proliferation	GO:0042127	0.000445696	57	CXCL10,FOXM1,CD22,ASPM,VTCN1,ABCC8,IQGAP3,EDN3,PLAC8,RTKN2,CD74,CD55,SERPINF1,GPBAR1,VSIG4,SFRP4,PDCD1LG2,IFIT3,RBP4,MMP9,CDC20,TAFA3,AIF1,NCKAP1L,FOLR2,MDK,SCIN,FAP,CLEC7A,GHSR,NTRK2,CD86,C5AR2,CSF1R,PDGFRA,C5AR1,TYROBP,NGFR,HPGD,IGF1,LST1,SRPX,BTK,CX3CR1,JAML,IGFBP6,ABI3BP,AGER,EIF2AK2,CLEC11A,PTN,IL18,ZFPM2,CTSZ,OGN,CDKN1C,ITGAX
GO:BP	negative regulation of viral process	GO:0048525	0.000445696	3	MX1,ISG15,IFIT1
GO:BP	regulation of cell death	GO:0010941	0.000508007	47	CXCL10,IFI6,AURKB,C1QA,ZBP1,VTCN1,NAIP,PLAC8,RTKN2,CD74,SERPINF1,SFRP4,TOP2A,FGD2,IFIT3,NDNF,G0S2,MMP9,AIF1,RNF213,CD200R1,NCKAP1L,TNFAIP8L2,NLRP1,TNFSF10,MAP2K6,MDK,SCIN,FAP,EVI2B,CLEC7A,GHSR,ANGPT4,NTRK2,CSF1R,C5AR1,TYROBP,CCL21,NGFR,HPGD,ITGB2,IGF1,DDAH2,SRPX,BTK,CX3CR1,NLRC4
GO:BP	regulation of hemopoiesis	GO:1903706	0.000566691	21	ISG15,PCK1,C1QC,CD2,CD74,NCKAP1L,NLRP3,NFAM1,MDK,SCIN,EVI2B,SPI1,CD86,SLAMF8,TYROBP,BTK,LOXL3,AGER,PTN,IL18,SOX12
GO:BP	regulation of cell motility	GO:2000145	0.000567631	33	CXCL10,C3AR1,ABCC8,DDX58,EDN3,COL1A1,CD74,SERPINF1,COL3A1,MMP9,AIF1,CD200R1,NCKAP1L,SRGAP3,DCN,MDK,MYOC,TPPP2,CLEC7A,EPB41L5,SPI1,ANGPT4,C5AR2,CSF1R,SLAMF8,PDGFRA,C5AR1,CCL21,WAS,IGSF10,IGF1,PLP1,CX3CR1
GO:BP	regulation of lymphocyte differentiation	GO:0045619	0.000577957	13	PCK1,CD2,CD74,NCKAP1L,NLRP3,NFAM1,MDK,CD86,SLAMF8,BTK,LOXL3,IL18,SOX12
GO:BP	positive regulation of cell communication	GO:0010647	0.000629518	51	ASPM,ZBP1,LY86,IQGAP3,EDN3,COL1A1,RTKN2,CD74,NDC80,RSAD2,GPBAR1,SFRP4,FGD2,CD180,COL3A1,DHX58,TMEM108,RBP4,G0S2,MMP9,DKK2,NFAM1,ROBO2,DCN,TNFSF10,MAP2K6,MYOC,CLSTN3,CLEC7A,GHSR,SPI1,NTRK2,CD86,C5AR2,CSF1R,PDGFRA,C5AR1,TYROBP,CCL21,NGFR,BANK1,IGF1,SRPX,HCST,GEN1,LOXL3,CX3CR1,IGFBP6,AGER,MAD2L1,EIF2AK2
GO:BP	neutrophil activation	GO:0042119	0.000668115	24	C3AR1,PLAC8,CD55,SLC11A1,MMP9,LAIR1,NCKAP1L,NFAM1,PIGR,CD53,SPI1,C5AR1,ADA2,TYROBP,ITGB2,GHDC,TCN1,CRISPLD2,FCER1G,IL18,CTSZ,CTSS,ITGAX,ATP8B4
GO:BP	regulation of viral life cycle	GO:1903900	0.000668115	6	MX1,ISG15,IFIT1,CD74,RSAD2,TOP2A
GO:BP	positive regulation of signaling	GO:0023056	0.000668115	51	ASPM,ZBP1,LY86,IQGAP3,EDN3,COL1A1,RTKN2,CD74,NDC80,RSAD2,GPBAR1,SFRP4,FGD2,CD180,COL3A1,DHX58,TMEM108,RBP4,G0S2,MMP9,DKK2,NFAM1,ROBO2,DCN,TNFSF10,MAP2K6,MYOC,CLSTN3,CLEC7A,GHSR,SPI1,NTRK2,CD86,C5AR2,CSF1R,PDGFRA,C5AR1,TYROBP,CCL21,NGFR,BANK1,IGF1,SRPX,HCST,GEN1,LOXL3,CX3CR1,IGFBP6,AGER,MAD2L1,EIF2AK2
GO:BP	positive regulation of leukocyte differentiation	GO:1902107	0.000678851	12	PCK1,CD74,NCKAP1L,NLRP3,MDK,EVI2B,CD86,TYROBP,BTK,AGER,IL18,SOX12
GO:BP	positive regulation of hemopoiesis	GO:1903708	0.000678851	12	PCK1,CD74,NCKAP1L,NLRP3,MDK,EVI2B,CD86,TYROBP,BTK,AGER,IL18,SOX12
GO:BP	regulation of chromosome organization	GO:0033044	0.000698712	10	AURKB,CDCA5,NDC80,CENPE,BUB1,UBE2C,TOP2A,CENPF,CDC20,KNTC1
GO:BP	positive regulation of lymphocyte activation	GO:0051251	0.000705711	19	PCK1,VTCN1,CD74,CD55,PDCD1LG2,AIF1,NCKAP1L,NLRP3,MDK,CLEC7A,CD86,TYROBP,CCL21,IGF1,BTK,AGER,THY1,IL18,SOX12
GO:BP	mitotic spindle midzone assembly	GO:0051256	0.0007133	2	AURKB,KIF4A
GO:BP	negative regulation of cellular component organization	GO:0051129	0.0007133	36	CXCL10,AURKB,NDC80,BUB1,TOP2A,CENPF,CDC20,FAT3,KNTC1,ROBO2,MYOC,ZNF365,SCIN,FAP,SPI1,RTN4RL1,CCL21,NGFR,WAS,IGF1,GEN1,MAD2L1,ESPL1,THY1,PTN,SPEF1,SORL1,CTSZ,MDM1,SEMA4F,IQANK1,TRIM9,UNC119,ARRB2,ODF2L,TWIST1
GO:BP	positive regulation of cell migration	GO:0030335	0.0007133	24	CXCL10,C3AR1,EDN3,COL1A1,CD74,MMP9,AIF1,NCKAP1L,MDK,MYOC,CLEC7A,EPB41L5,SPI1,ANGPT4,CSF1R,PDGFRA,C5AR1,CCL21,IGF1,PLP1,CX3CR1,AGER,THY1,PTN
GO:BP	positive regulation of cytokine production involved in immune response	GO:0002720	0.000725964	6	DDX58,CD74,RSAD2,CD55,NLRP3,CLEC7A
GO:BP	mitotic cell cycle phase transition	GO:0044772	0.000767433	14	CYP1A1,FOXM1,AURKB,CDCA5,IQGAP3,NDC80,CENPE,BUB1,UBE2C,CENPF,CDC20,AIF1,POLE,KNTC1
GO:BP	regulation of cell junction assembly	GO:1901888	0.000775692	14	GPBAR1,CNTNAP2,ROBO2,MYOC,CLSTN3,SLITRK6,COL16A1,GHSR,EPB41L5,NTRK2,SLITRK5,AGRN,THY1,PTPRD
GO:BP	granulocyte activation	GO:0036230	0.000787973	24	C3AR1,PLAC8,CD55,SLC11A1,MMP9,LAIR1,NCKAP1L,NFAM1,PIGR,CD53,SPI1,C5AR1,ADA2,TYROBP,ITGB2,GHDC,TCN1,CRISPLD2,FCER1G,IL18,CTSZ,CTSS,ITGAX,ATP8B4
GO:BP	positive regulation of production of molecular mediator of immune response	GO:0002702	0.000815089	8	DDX58,CD74,RSAD2,CD55,RBP4,NLRP3,CLEC7A,CD86
GO:BP	positive regulation of macrophage migration	GO:1905523	0.000821633	5	C3AR1,MDK,CSF1R,C5AR1,CX3CR1
GO:BP	spindle elongation	GO:0051231	0.000877444	2	AURKB,KIF4A
GO:BP	apoptotic process	GO:0006915	0.000877444	51	CXCL10,IFI6,MX1,AURKB,ZBP1,VTCN1,CD2,NAIP,PLAC8,RTKN2,CD74,XAF1,BUB1,SFRP4,TOP2A,FGD2,IFIT3,NDNF,G0S2,MMP9,AIF1,RNF213,NCKAP1L,NLRP3,TNFAIP8L2,ROBO2,CIT,NLRP1,TNFSF10,MAP2K6,MDK,SCIN,FAP,EVI2B,GHSR,SPI1,ANGPT4,NTRK2,CSF1R,C5AR1,TYROBP,CCL21,NGFR,HPGD,ITGB2,IGF1,DDAH2,SRPX,BTK,CX3CR1,NLRC4
GO:BP	mitotic spindle elongation	GO:0000022	0.000877444	2	AURKB,KIF4A
GO:BP	cytokine-mediated signaling pathway	GO:0019221	0.000935394	5	CXCL10,IFI6,MX1,ISG15,IFIT1
GO:BP	interleukin-6 production	GO:0032635	0.000941808	14	DDX58,CD74,AIF1,CD200R1,NCKAP1L,CLEC7A,GHSR,C5AR2,TYROBP,BANK1,AGER,TLR1,ARRB2,TWIST1
GO:BP	xenobiotic metabolic process	GO:0006805	0.000941808	2	CYP1A1,GLYAT
GO:BP	interleukin-1 beta production	GO:0032611	0.000941808	9	NLRP3,NLRP1,CLEC7A,GHSR,TYROBP,IGF1,CX3CR1,NLRC4,AGER
GO:BP	regulation of interleukin-1 beta production	GO:0032651	0.000941808	9	NLRP3,NLRP1,CLEC7A,GHSR,TYROBP,IGF1,CX3CR1,NLRC4,AGER
GO:BP	neutrophil degranulation	GO:0043312	0.000941808	23	C3AR1,PLAC8,CD55,SLC11A1,MMP9,LAIR1,NCKAP1L,NFAM1,PIGR,CD53,SPI1,C5AR1,ADA2,TYROBP,ITGB2,GHDC,TCN1,CRISPLD2,FCER1G,CTSZ,CTSS,ITGAX,ATP8B4
GO:BP	regulation of interleukin-6 production	GO:0032675	0.000941808	14	DDX58,CD74,AIF1,CD200R1,NCKAP1L,CLEC7A,GHSR,C5AR2,TYROBP,BANK1,AGER,TLR1,ARRB2,TWIST1
GO:BP	regulation of cell migration	GO:0030334	0.000952516	31	CXCL10,C3AR1,ABCC8,DDX58,EDN3,COL1A1,CD74,SERPINF1,COL3A1,MMP9,AIF1,CD200R1,NCKAP1L,SRGAP3,DCN,MDK,MYOC,CLEC7A,EPB41L5,SPI1,ANGPT4,C5AR2,CSF1R,SLAMF8,PDGFRA,C5AR1,CCL21,IGSF10,IGF1,PLP1,CX3CR1
GO:BP	cellular response to biotic stimulus	GO:0071216	0.000955137	13	CXCL10,LY86,CD55,PDCD1LG2,CD180,NLRP3,CLEC7A,CCR5,GHSR,SPI1,CD86,BTK,CX3CR1
GO:BP	viral genome replication	GO:0019079	0.000957575	3	MX1,ISG15,IFIT1
GO:BP	positive regulation of molecular function	GO:0044093	0.000957575	55	AURKB,ABCC8,IQGAP3,DDX58,EDN3,RTKN2,CD74,SLC11A1,CENPE,UBE2C,FGD2,MMP9,CDC20,RGS18,NCKAP1L,NLRP3,AZIN2,SRGAP3,NFAM1,NLRP1,TNFSF10,MAP2K6,ARHGAP15,ARHGAP33,CLEC7A,EPB41L5,FCGR1A,ANGPT4,NTRK2,CD86,CSF1R,PDGFRA,WNK4,C5AR1,RANBP3L,CCL21,NGFR,RGS10,ITGB2,IGF1,BTK,ARHGAP30,CX3CR1,NLRC4,IGFBP6,LCP2,AGER,AGRN,EIF2AK2,THY1,IL18,SORL1,CHTF18,CTSS,SYNGR3
GO:BP	cellular response to xenobiotic stimulus	GO:0071466	0.000987805	2	CYP1A1,GLYAT
GO:BP	keratan sulfate catabolic process	GO:0042340	0.00102227	4	LUM,FMOD,PRELP,OGN
GO:BP	ISG15-protein conjugation	GO:0032020	0.00102428	3	ISG15,UBA7,HERC5
GO:BP	DNA metabolic process	GO:0006259	0.00103305	5	CYP1A1,ISG15,PCLAF,FOXM1,AURKB
GO:BP	cell cycle	GO:0007049	0.00103305	19	CYP1A1,PCLAF,FOXM1,AURKB,CEP55,KIF4A,ASPM,CDCA8,MKI67,CDCA5,KIF18B,IQGAP3,EDN3,NDC80,CENPA,CENPE,BUB1,UBE2C,TOP2A
GO:BP	negative regulation of long-term synaptic potentiation	GO:1900272	0.00103305	4	TYROBP,CX3CR1,AGER,PTN
GO:BP	dendritic cell antigen processing and presentation	GO:0002468	0.00103305	4	CD74,SLC11A1,CCL21,CLEC4A
GO:BP	neutrophil activation involved in immune response	GO:0002283	0.00104674	23	C3AR1,PLAC8,CD55,SLC11A1,MMP9,LAIR1,NCKAP1L,NFAM1,PIGR,CD53,SPI1,C5AR1,ADA2,TYROBP,ITGB2,GHDC,TCN1,CRISPLD2,FCER1G,CTSZ,CTSS,ITGAX,ATP8B4
GO:BP	response to auditory stimulus	GO:0010996	0.00106855	5	CXCL10,CNTNAP2,MDK,SLITRK6,PTN
GO:BP	cellular response to stimulus	GO:0051716	0.00106855	170	CYP1A1,GLYAT,CXCL10,IFI6,MX1,ISG15,PCLAF,FOXM1,AURKB,IFIT1,C3AR1,FCGR3A,PCK1,CEP55,CD22,ASPM,CDCA5,ZBP1,COL1A2,VTCN1,CD2,LY86,ABCC8,IQGAP3,DDX58,EDN3,COL1A1,SHISA3,RTKN2,CD74,NDC80,RSAD2,CD55,XAF1,SERPINF1,GPBAR1,BUB1,SFRP4,PDCD1LG2,CPZ,TOP2A,FGD2,IFIT3,CD180,COL3A1,NDNF,CENPF,XCR1,DHX58,FAM83E,FMOD,TMEM108,MILR1,G0S2,ANGPTL1,MMP9,DKK2,LPXN,CIITA,PDGFRL,CDC20,TAFA3,AIF1,POLE,RNF213,KNTC1,RGS18,CD…
GO:BP	negative regulation of response to stimulus	GO:0048585	0.00107448	41	IFI6,ISG15,FOXM1,FCGR3A,CD22,ABCC8,SHISA3,RTKN2,CD74,CD55,SERPINF1,GPBAR1,VSIG4,SFRP4,COL3A1,DHX58,CD84,MMP9,DKK2,LPXN,TAFA3,AIF1,RNF213,RGS18,CD200R1,NLRP3,TNFAIP8L2,ROBO2,DCN,CIT,TNFSF10,MDK,MYOC,FAP,GHSR,SPI1,FCGR1A,RTN4RL1,C5AR2,SLAMF8,PDGFRA
GO:BP	response to xenobiotic stimulus	GO:0009410	0.00107448	2	CYP1A1,GLYAT
GO:BP	regulation of developmental process	GO:0050793	0.00109788	71	CXCL10,ISG15,FOXM1,C3AR1,PCK1,ASPM,C1QC,CD2,ABCC8,IQGAP3,EDN3,PLAC8,COL1A1,CD74,SERPINF1,SFRP4,FGD2,CENPF,RBP4,MMP9,CDC20,FAT3,NCKAP1L,NLRP3,NFAM1,ROBO2,DCN,MDK,ARHGAP15,MYOC,CLSTN3,ARHGAP33,ZNF365,SCIN,EVI2B,CLEC7A,SLITRK6,ITPKA,GHSR,CD53,SPI1,ANGPT4,NTRK2,CD86,RTN4RL1,CSF1R,SLAMF8,PDGFRA,C5AR1,TYROBP,RANBP3L,NGFR,SLITRK5,ITGB2,IGF1,LST1,BTK,LOXL3,CX3CR1,ABI3BP,AGER,AGRN,EIF2AK2,BASP1,THY1,PTN,S…
GO:BP	ethylene metabolic process	GO:0009692	0.0011609	1	CYP1A1
GO:BP	regulation of programmed cell death	GO:0043067	0.0011609	43	CXCL10,IFI6,AURKB,ZBP1,VTCN1,NAIP,PLAC8,RTKN2,CD74,SFRP4,TOP2A,FGD2,IFIT3,NDNF,G0S2,MMP9,AIF1,RNF213,NCKAP1L,TNFAIP8L2,NLRP1,TNFSF10,MAP2K6,MDK,SCIN,FAP,EVI2B,CLEC7A,GHSR,ANGPT4,NTRK2,CSF1R,C5AR1,TYROBP,CCL21,NGFR,HPGD,IGF1,DDAH2,SRPX,BTK,CX3CR1,NLRC4
GO:BP	dibenzo-p-dioxin catabolic process	GO:0019341	0.0011609	1	CYP1A1
GO:BP	positive regulation of macrophage chemotaxis	GO:0010759	0.00117136	4	C3AR1,MDK,CSF1R,C5AR1
GO:BP	positive regulation of cell motility	GO:2000147	0.00117136	24	CXCL10,C3AR1,EDN3,COL1A1,CD74,MMP9,AIF1,NCKAP1L,MDK,MYOC,CLEC7A,EPB41L5,SPI1,ANGPT4,CSF1R,PDGFRA,C5AR1,CCL21,IGF1,PLP1,CX3CR1,AGER,THY1,PTN
GO:BP	positive regulation of dendritic cell antigen processing and presentation	GO:0002606	0.00120583	3	CD74,SLC11A1,CCL21
GO:BP	mitotic cytokinesis	GO:0000281	0.00121496	9	CEP55,KIF4A,CENPA,CIT,KIF20A,ESPL1,ANLN,UNC119,NUSAP1
GO:BP	positive regulation of leukocyte mediated immunity	GO:0002705	0.0012592	10	DDX58,RSAD2,CD55,NLRP3,CLEC7A,SPI1,TYROBP,ITGB2,BTK,IL18
GO:BP	protein localization to chromosome, centromeric region	GO:0071459	0.0012592	3	AURKB,NDC80,CENPA
GO:BP	kinetochore assembly	GO:0051382	0.00127097	3	CENPA,CENPE,CENPF
GO:BP	regulation of apoptotic process	GO:0042981	0.00127436	42	CXCL10,IFI6,AURKB,ZBP1,VTCN1,NAIP,PLAC8,RTKN2,CD74,SFRP4,TOP2A,FGD2,IFIT3,NDNF,G0S2,MMP9,AIF1,RNF213,NCKAP1L,TNFAIP8L2,NLRP1,TNFSF10,MAP2K6,MDK,SCIN,FAP,EVI2B,GHSR,ANGPT4,NTRK2,CSF1R,C5AR1,TYROBP,CCL21,NGFR,HPGD,IGF1,DDAH2,SRPX,BTK,CX3CR1,NLRC4
GO:BP	cellular response to lipopolysaccharide	GO:0071222	0.00128252	10	CXCL10,LY86,CD55,PDCD1LG2,CD180,NLRP3,CCR5,GHSR,SPI1,CD86
GO:BP	adaptive immune response based on somatic recombination of immune receptors built from immunoglobulin superfamily domains	GO:0002460	0.00133413	8	C2,C1QC,C1QA,CD74,RSAD2,CD55,SLC11A1,C1S
GO:BP	regulation of production of molecular mediator of immune response	GO:0002700	0.00135028	9	CD22,DDX58,CD74,RSAD2,CD55,RBP4,NLRP3,CLEC7A,CD86
GO:BP	positive regulation of T cell proliferation	GO:0042102	0.00136458	9	VTCN1,CD55,PDCD1LG2,AIF1,NCKAP1L,CD86,IGF1,AGER,IL18
GO:BP	regulation of synapse structure or activity	GO:0050803	0.00136458	14	MX1,C1QL3,CDC20,ROBO2,CLSTN3,ARHGAP33,SLITRK6,ITPKA,GHSR,NTRK2,SLITRK5,AGRN,PTN,PTPRD
GO:BP	spindle midzone assembly	GO:0051255	0.00136458	2	AURKB,KIF4A
GO:BP	positive regulation of leukocyte proliferation	GO:0070665	0.00136458	11	VTCN1,CD74,CD55,PDCD1LG2,AIF1,NCKAP1L,CD86,CSF1R,IGF1,AGER,IL18
GO:BP	regulation of leukocyte mediated immunity	GO:0002703	0.0013755	13	DDX58,RSAD2,CD55,CD84,NLRP3,CLEC7A,SPI1,TYROBP,WAS,ITGB2,BTK,AGER,IL18
GO:BP	neutrophil mediated immunity	GO:0002446	0.0013755	23	C3AR1,PLAC8,CD55,SLC11A1,MMP9,LAIR1,NCKAP1L,NFAM1,PIGR,CD53,SPI1,C5AR1,ADA2,TYROBP,ITGB2,GHDC,TCN1,CRISPLD2,FCER1G,CTSZ,CTSS,ITGAX,ATP8B4
GO:BP	positive regulation of catalytic activity	GO:0043085	0.00148019	44	AURKB,IQGAP3,EDN3,CD74,SLC11A1,CENPE,UBE2C,FGD2,CDC20,RGS18,NCKAP1L,NLRP3,AZIN2,SRGAP3,NLRP1,TNFSF10,MAP2K6,ARHGAP15,ARHGAP33,CLEC7A,FCGR1A,ANGPT4,NTRK2,CD86,CSF1R,PDGFRA,C5AR1,RANBP3L,CCL21,NGFR,RGS10,ITGB2,IGF1,ARHGAP30,NLRC4,IGFBP6,LCP2,AGER,AGRN,EIF2AK2,THY1,IL18,SORL1,CHTF18
GO:BP	hepatocyte differentiation	GO:0070365	0.00149315	2	CYP1A1,PCK1
GO:BP	positive regulation of cellular component movement	GO:0051272	0.00153454	24	CXCL10,C3AR1,EDN3,COL1A1,CD74,MMP9,AIF1,NCKAP1L,MDK,MYOC,CLEC7A,EPB41L5,SPI1,ANGPT4,CSF1R,PDGFRA,C5AR1,CCL21,IGF1,PLP1,CX3CR1,AGER,THY1,PTN
GO:BP	positive regulation of transferase activity	GO:0051347	0.00158355	27	AURKB,IQGAP3,EDN3,CD74,SLC11A1,CENPE,UBE2C,FGD2,CDC20,NCKAP1L,MAP2K6,FCGR1A,ANGPT4,NTRK2,CD86,CSF1R,PDGFRA,C5AR1,CCL21,IGF1,IGFBP6,LCP2,AGER,EIF2AK2,IL18,SORL1,CHTF18
GO:BP	positive regulation of locomotion	GO:0040017	0.00160301	24	CXCL10,C3AR1,EDN3,COL1A1,CD74,MMP9,AIF1,NCKAP1L,MDK,MYOC,CLEC7A,EPB41L5,SPI1,ANGPT4,CSF1R,PDGFRA,C5AR1,CCL21,IGF1,PLP1,CX3CR1,AGER,THY1,PTN
GO:BP	response to vitamin	GO:0033273	0.00160315	2	CYP1A1,CXCL10
GO:BP	positive regulation of cellular process	GO:0048522	0.0016035	137	CYP1A1,CXCL10,ISG15,FOXM1,AURKB,C3AR1,PCK1,C2,ASPM,CDCA5,C1QA,ZBP1,VTCN1,CD2,LY86,ABCC8,IQGAP3,DDX58,EDN3,PLAC8,COL1A1,RTKN2,CD74,NDC80,RSAD2,CD55,SLC11A1,SERPINF1,GPBAR1,CENPE,SFRP4,PDCD1LG2,UBE2C,TOP2A,FGD2,CD180,COL3A1,NDNF,LUM,DHX58,TMEM108,RBP4,G0S2,MMP9,CNTNAP2,DKK2,CIITA,CDC20,TAFA3,AIF1,NCKAP1L,NLRP3,AZIN2,NFAM1,ROBO2,DCN,CIT,NLRP1,TNFSF10,MAP2K6,FOLR2,MDK,MYOC,CLSTN3,ZNF365,SCIN,FAP,EVI2…
GO:BP	exocytosis	GO:0006887	0.00167272	34	C3AR1,PLAC8,CD55,SLC11A1,CD84,MILR1,MMP9,LAIR1,NCKAP1L,NFAM1,SCIN,PIGR,F13A1,CD53,SPI1,RAB3B,C5AR1,ADA2,TYROBP,LAT2,PPFIA3,ITGB2,IGF1,BTK,GHDC,TCN1,CRISPLD2,FCER1G,CTSZ,CTSS,SYNGR3,ITGAX,PTGDS,ATP8B4
GO:BP	regulation of cellular component movement	GO:0051270	0.00167272	32	CXCL10,C3AR1,ABCC8,DDX58,EDN3,COL1A1,CD74,SERPINF1,COL3A1,MMP9,AIF1,CD200R1,NCKAP1L,SRGAP3,DCN,MDK,MYOC,TPPP2,CLEC7A,EPB41L5,SPI1,ANGPT4,C5AR2,CSF1R,SLAMF8,PDGFRA,C5AR1,CCL21,WAS,IGSF10,IGF1,PLP1
GO:BP	macrophage chemotaxis	GO:0048246	0.00167626	5	C3AR1,MDK,CSF1R,SLAMF8,C5AR1
GO:BP	chemotaxis	GO:0006935	0.00168088	24	CXCL10,C3AR1,EDN3,CD74,XCR1,AIF1,NCKAP1L,ROBO2,ACKR4,MDK,CCR5,SPI1,C5AR2,CSF1R,SLAMF8,PDGFRA,C5AR1,CCL21,NGFR,ITGB2,CX3CR1,JAML,AGER,FCER1G
GO:BP	regulation of exit from mitosis	GO:0007096	0.00168088	6	CDCA5,UBE2C,CDC20,KNTC1,MAD2L1,ANLN
GO:BP	microtubule cytoskeleton organization	GO:0000226	0.00168088	10	PCLAF,AURKB,KIF4A,ASPM,CDCA8,KIF18B,NDC80,CENPA,CENPE,BUB1
GO:BP	antigen processing and presentation	GO:0019882	0.00170883	14	KIF4A,CD74,SLC11A1,CENPE,KIF15,FCGR1A,RAB3B,CCL21,WAS,NCF4,CLEC4A,FCER1G,NCF2,CTSS
GO:BP	regulation of viral process	GO:0050792	0.00173379	6	MX1,ISG15,IFIT1,CD74,RSAD2,TOP2A
GO:BP	negative regulation of cell adhesion	GO:0007162	0.00177819	13	VTCN1,COL1A1,CD74,VSIG4,PDCD1LG2,LPXN,TNFAIP8L2,MDK,MYOC,EPB41L5,SPI1,CD86,CCL21
GO:BP	taxis	GO:0042330	0.00177819	24	CXCL10,C3AR1,EDN3,CD74,XCR1,AIF1,NCKAP1L,ROBO2,ACKR4,MDK,CCR5,SPI1,C5AR2,CSF1R,SLAMF8,PDGFRA,C5AR1,CCL21,NGFR,ITGB2,CX3CR1,JAML,AGER,FCER1G
GO:BP	lipoxin metabolic process	GO:2001300	0.00179705	3	PTGR1,ALOX5AP,HPGD
GO:BP	cell death	GO:0008219	0.00185137	53	CXCL10,IFI6,MX1,AURKB,C1QA,ZBP1,VTCN1,CD2,NAIP,PLAC8,RTKN2,CD74,XAF1,SERPINF1,BUB1,SFRP4,TOP2A,FGD2,IFIT3,NDNF,G0S2,MMP9,AIF1,RNF213,CD200R1,NCKAP1L,NLRP3,TNFAIP8L2,ROBO2,CIT,NLRP1,TNFSF10,MAP2K6,MDK,SCIN,FAP,EVI2B,CLEC7A,GHSR,SPI1,ANGPT4,NTRK2,CSF1R,C5AR1,TYROBP,CCL21,NGFR,HPGD,ITGB2,IGF1,DDAH2,SRPX,BTK
GO:BP	regulation of myeloid leukocyte mediated immunity	GO:0002886	0.00192224	6	DDX58,CD84,SPI1,TYROBP,ITGB2,BTK
GO:BP	positive regulation of lymphocyte differentiation	GO:0045621	0.00195399	9	PCK1,CD74,NCKAP1L,NLRP3,MDK,CD86,BTK,IL18,SOX12
GO:BP	cellular response to molecule of bacterial origin	GO:0071219	0.00196283	10	CXCL10,LY86,CD55,PDCD1LG2,CD180,NLRP3,CCR5,GHSR,SPI1,CD86
GO:BP	translesion synthesis	GO:0019985	0.00196283	2	ISG15,PCLAF
GO:BP	establishment of organelle localization	GO:0051656	0.00196283	10	MX1,AURKB,CDCA8,CDCA5,NDC80,CENPA,CENPE,CENPF,CD84,MILR1
GO:BP	DNA biosynthetic process	GO:0071897	0.00196283	3	ISG15,PCLAF,AURKB
GO:BP	insecticide metabolic process	GO:0017143	0.00196283	1	CYP1A1
GO:BP	cellular response to virus	GO:0098586	0.00196283	2	CXCL10,IFI6
GO:BP	benzoyl-CoA metabolic process	GO:1901787	0.00196283	1	GLYAT
GO:BP	olefin metabolic process	GO:1900673	0.00196283	1	CYP1A1
GO:BP	cellular alkene metabolic process	GO:0043449	0.00196283	1	CYP1A1
GO:BP	adaptive immune response	GO:0002250	0.0019676	15	C2,C1QC,C1QA,VTCN1,CD74,RSAD2,CD55,SLC11A1,PDCD1LG2,C1S,SLAMF7,CD84,LAIR1,C1R,NLRP3
GO:BP	pyroptosis	GO:0070269	0.0019676	4	ZBP1,NAIP,NLRP1,NLRC4
GO:BP	cellular response to cytokine stimulus	GO:0071345	0.00198823	12	CXCL10,IFI6,MX1,ISG15,IFIT1,PCK1,ZBP1,COL1A2,COL1A1,CD74,RSAD2,XAF1
GO:BP	reactive oxygen species metabolic process	GO:0072593	0.00199158	3	CYP1A1,IFI6,FOXM1
GO:BP	synapse pruning	GO:0098883	0.00204017	2	C1QC,C1QA
GO:BP	aging	GO:0007568	0.00204557	5	CYP1A1,FOXM1,AURKB,PCK1,C1QA
GO:BP	response to wounding	GO:0009611	0.00204557	26	CYP1A1,COL1A2,ABCC8,COL1A1,SLC11A1,COL3A1,NDNF,AIF1,DCN,MDK,FAP,CLEC7A,F13A1,RTN4RL1,PDGFRA,TYROBP,WAS,IGF1,CX3CR1,JAML,ABI3BP,LCP2,AGER,FCER1G,PTN,ZFPM2
GO:BP	negative regulation of cell-cell adhesion	GO:0022408	0.00204751	11	VTCN1,CD74,VSIG4,PDCD1LG2,TNFAIP8L2,MDK,EPB41L5,SPI1,CD86,CCL21,LOXL3
GO:BP	regulation of antigen processing and presentation	GO:0002577	0.00205424	4	CD74,SLC11A1,CCL21,WAS
GO:BP	response to chemical	GO:0042221	0.00205424	89	CYP1A1,GLYAT,CXCL10,IFI6,MX1,ISG15,IFIT1,C3AR1,PCK1,RTP4,C2,C1QA,ZBP1,COL1A2,LY86,ABCC8,IQGAP3,DDX58,EDN3,COL1A1,CD74,RSAD2,CD55,SLC11A1,XAF1,SERPINF1,GPBAR1,SFRP4,PDCD1LG2,IFIT3,CD180,COL3A1,NDNF,CENPF,XCR1,LUM,FMOD,TMEM108,MXRA5,RBP4,MMP9,LPXN,CIITA,AIF1,NCKAP1L,NLRP3,ROBO2,DCN,NLRP1,HNMT,TNFSF10,MAP2K6,ACKR4,FOLR2,MDK,ARHGAP33,PTGR1,CLEC7A,COL16A1,CCR5,SELPLG,NNMT,PIGR,GHSR,F13A1,ALOX5AP,EPB41…
GO:BP	T cell activation involved in immune response	GO:0002286	0.0020936	9	PCK1,CD74,SLC11A1,NLRP3,MDK,CD86,LOXL3,FCER1G,IL18
GO:BP	positive regulation of mitotic cell cycle spindle assembly checkpoint	GO:0090267	0.00212474	3	NDC80,GEN1,MAD2L1
GO:BP	positive regulation of spindle checkpoint	GO:0090232	0.00212474	3	NDC80,GEN1,MAD2L1
GO:BP	regulation of lipopolysaccharide-mediated signaling pathway	GO:0031664	0.0022007	3	LY86,CD55,CD180
GO:BP	complement component C5a signaling pathway	GO:0038178	0.00220073	2	C5AR2,C5AR1
GO:BP	regulation of defense response	GO:0031347	0.00222724	29	ISG15,IFIT1,FCGR3A,ZBP1,DDX58,SERPINF1,GPBAR1,VSIG4,DHX58,MMP9,TAFA3,CD200R1,NLRP3,TNFAIP8L2,NLRP1,MDK,GHSR,ALOX5AP,SPI1,FCGR1A,SLAMF8,TYROBP,IGF1,HERC5,BTK,NLRC4,AGER,CLEC4A,FCER1G
GO:BP	positive regulation of exit from mitosis	GO:0031536	0.00225172	2	CDCA5,UBE2C
GO:BP	interleukin-1 production	GO:0032612	0.00226428	9	NLRP3,NLRP1,CLEC7A,GHSR,TYROBP,IGF1,CX3CR1,NLRC4,AGER
GO:BP	regulation of interleukin-1 production	GO:0032652	0.00226428	9	NLRP3,NLRP1,CLEC7A,GHSR,TYROBP,IGF1,CX3CR1,NLRC4,AGER
GO:BP	programmed cell death	GO:0012501	0.00226428	50	CXCL10,IFI6,MX1,AURKB,ZBP1,VTCN1,CD2,NAIP,PLAC8,RTKN2,CD74,XAF1,BUB1,SFRP4,TOP2A,FGD2,IFIT3,NDNF,G0S2,MMP9,AIF1,RNF213,NCKAP1L,NLRP3,TNFAIP8L2,ROBO2,CIT,NLRP1,TNFSF10,MAP2K6,MDK,SCIN,FAP,EVI2B,CLEC7A,GHSR,SPI1,ANGPT4,NTRK2,CSF1R,C5AR1,TYROBP,CCL21,NGFR,HPGD,ITGB2,IGF1,DDAH2,SRPX,BTK
GO:BP	regulation of CD4-positive, alpha-beta T cell activation	GO:2000514	0.00226596	7	CD55,NCKAP1L,NLRP3,CD86,LOXL3,AGER,IL18
GO:BP	positive regulation of tumor necrosis factor superfamily cytokine production	GO:1903557	0.00236035	10	CD2,ABCC8,DDX58,CLEC7A,CD86,TYROBP,AGER,TLR1,CYBB,TWIST1
GO:BP	regulation of myeloid dendritic cell chemotaxis	GO:2000527	0.00237445	2	SPI1,CCL21
GO:BP	positive regulation of myeloid dendritic cell chemotaxis	GO:2000529	0.00237445	2	SPI1,CCL21
GO:BP	positive regulation of lymphocyte proliferation	GO:0050671	0.00240676	10	VTCN1,CD74,CD55,PDCD1LG2,AIF1,NCKAP1L,CD86,IGF1,AGER,IL18
GO:BP	cytoskeleton-dependent cytokinesis	GO:0061640	0.00240676	10	AURKB,CEP55,KIF4A,CENPA,CIT,KIF20A,ESPL1,ANLN,UNC119,NUSAP1
[truncated: 1,012 more rows]

## Sheet: TH cold DOWN
source	term_name	term_id	FDR	intersection_size	intersections
[truncated: 2,860 more rows]

## Sheet: TH atemp UP
source	term_name	term_id	FDR	intersection_size	intersections
[truncated: 1,250 more rows]

[truncated: 1 more sheets: TH atemp DOWN]
