# Supplementary material for: RNAseq Analysis of Brown Adipose Tissue and Thyroid of Newborn Lambs Subjected to Short-Term Cold Exposure Reveals Signs of Early Whitening of Adipose Tissue
Source: Metabolites. 2022 Oct 20;12(10):996. doi: 10.3390/metabo12100996 (PMC9607389; doi:10.3390/metabo12100996)
Supplement: Supplementary file 1 [file metabolites-12-00996-s001.zip › Additional file 6. Table S5. Primer sequences for RT-qPCR.xlsx]

## Sheet: Primers
Table S5: Primer sequences for RT-qPCR
Gene	Primer sequence Forward	Primer sequence Reverse	Amplicon length (bp)	Source
VEGFA	GGGCTGCTGTAATGACGAAAGT	CTGGCTTTGGTGAGGTTTGATC	94	Bedir et al., 2022
PGC1A	TCGTGTTGGGCGAGAGAAAG	GGHGCCCTGGAATGGAAGTC	150	This paper
KI67	TGGCTTTGTTCTCTGCGTCT	CCTCGGAGCTGAAGTGTGAA	150	This paper
BMP4	TGACCAGGGTCTGCACAATG	CGCTCTACGTGGACTTCAGT	150	This paper
ADRB3	CGCCTCCAACATGCCCTAC	GCGTAGACGAAGAGCATCAC	81	Pope et al., 2014
DIO2	AAGGCATTAGGAAGTGGCCC	GGGAAGTTGCAGACTGGGAA	150	This paper
ACTB	AGTCGGTTGGATCGAGCATC	AGAAGGAGGGTGGCTTTTGG	150	This paper
GAPDH	CTGCTGACGCTCCCATGTTTGT	TAAGTCCCTCCACGATGCCAAA	150	Yu et al., 2009
Bedir, Ö., Gram, A., Dorsam, S. T., Grazul-Bilska, A. T., & Kowalewski, M. P. (2022). Plane of nutrition and FSH-induced superovulation affect the expression of steroid hormone receptors and growth factors in caruncular tissue of non-pregnant sheep. Domestic animal endocrinology, 78, 106683.
Pope, M., Budge, H., & Symonds, M. E. (2014). The developmental transition of ovine adipose tissue through early life. Acta Physiologica, 210(1), 20-30.
Yu, Y., Song, X., Du, L., & Wang, C. (2009). Molecular characterization of the sheep CIB1 gene. Molecular biology reports, 36(7), 1799-1809.
