# Supplementary material for: RNAseq Analysis of Brown Adipose Tissue and Thyroid of Newborn Lambs Subjected to Short-Term Cold Exposure Reveals Signs of Early Whitening of Adipose Tissue
Source: Metabolites. 2022 Oct 20;12(10):996. doi: 10.3390/metabo12100996 (PMC9607389; doi:10.3390/metabo12100996)
Supplement: Supplementary file 1 [file metabolites-12-00996-s001.zip › Additonal file 3. Table S3. DESeq results for the 38 analysed genes.xlsx]

## Sheet: BAT Cold-Control
Gene	baseMean	log2FoldChange	lfcSE	FDR	Cold 1	Cold 2	Cold 3	Cold 4	Cold 5	Cold 6	Control 1	Control 2	AT 1	AT 2	AT 3	AT 4	AT 5	AT 6
UCP1	8489.18	-1.42177	1.01579	0.467937	12407.4	8841.22	8265.53	10382.1	5401.39	2906.5	22461.6	20586.5	6764.92	12952.9	3195.71	768.325	3719.64	194.713
ADRB1	139.705	-0.0608859	0.510909	0.963979	187.907	152.165	176.803	181.322	106.052	99.8223	192.539	121.698	97.4194	218.369	125.511	82.1738	184.255	29.8306
ADRB2	139.498	0.351894	0.384539	0.672271	135.814	98.4999	200.203	79.2091	97.3355	99.8223	77.5506	106.096	135.623	143.723	230.64	262.956	167.803	117.695
ADRB3	396.622	-1.23213	0.584808	0.207617	558.14	201.755	217.103	315.882	357.381	163.213	1004.15	414.243	659.014	509.157	290.714	443.739	352.058	66.1697
ADRA1A	477.593	-0.178035	0.621751	0.914764	571.163	364.789	507.008	510.565	328.326	383.988	628.427	376.797	417.375	1388.21	291.787	238.304	592.247	87.3223
PPARGC1A	622.58	-0.52446	0.525489	0.638526	552.558	623.606	748.811	1244.44	624.69	429.163	1429.34	596.79	697.217	508.043	597.519	241.386	301.059	121.492
PPARGC1B	755.105	-0.561544	0.482554	0.563891	974.884	351.882	800.812	700.475	528.808	480.167	1096.4	789.48	895.876	1168.72	1175.73	754.972	653.117	200.136
PPARA	359.278	-0.145365	0.276824	0.829326	331.163	309.765	395.206	288.207	301.449	295.824	355.663	351.833	427.881	313.07	479.517	549.537	396.477	234.306
PPARG	3767.97	-0.445123	0.346262	0.514427	3786.05	2012.79	4215.96	3059.57	3145.97	2772.44	4227.84	4388.94	5355.2	4820.84	3449.95	3869.36	5728.35	1918.38
ELOVL6	1099.55	-1.04797	0.558869	0.285107	865.116	656.893	755.311	842.67	704.593	566.874	1367.83	1657.75	1031.5	1979.81	917.197	598.842	3153.72	295.594
BMP4	427.755	0.972438	0.400054	0.128918	411.163	434.758	577.209	585.956	363.192	292.909	274.101	179.427	346.698	186.06	507.408	690.26	536.313	603.121
BMP7	39.9493	-0.123636	0.828233	0.955829	52.093	86.9517	10.4002	17.1779	39.9511	14.5726	53.4832	27.3041	22.9222	12.2554	19.3094	70.8749	18.0964	113.899
BMP8B	19.3	-0.490925	0.673666	0.748666	11.1628	27.1724	27.3004	28.6298	10.8958	18.9444	32.0899	26.524	27.6977	15.5978	5.36372	9.24455	26.3221	3.25425
CIDEA	1616.47	-0.0960625	0.655229	0.956633	3088.37	974.13	969.815	2138.64	1045.27	1143.95	2131.3	1202.94	1097.4	1901.82	1372.04	1094.97	4226.34	243.526
CKB	1130.95	-0.0991175	0.442049	0.932629	1121.86	1184.04	959.415	1071.71	1017.66	1065.99	1137.85	1154.57	644.687	716.385	1856.92	2358.39	1015.05	528.815
PDK4	3959.51	0.759064	0.559332	0.483298	5384.19	8287.58	2577.94	4146.55	8604.02	3958.65	4050.01	2442.55	2658.02	1752.53	1245.46	6575.96	2648.66	1101.02
TGM2	2089.45	0.142139	0.299689	0.849524	1912.56	2580.02	1809.63	3227.53	2131.21	1756	1750.24	2302.13	2661.84	2016.57	1117.8	2025.58	2049.83	1911.33
FNDC5	131.615	1.26538	0.444353	0.061217	139.535	114.803	59.8009	80.1634	137.287	139.897	54.8202	39.0059	269.336	77.9891	196.312	169.483	121.74	242.441
ACSL5	858.108	0.276168	0.35735	0.731157	1077.21	552.958	1068.62	1016.36	833.889	721.343	711.326	737.992	726.825	625.027	879.651	1563.36	529.732	969.224
CPT1A	2925.47	-0.954926	0.335255	0.0611876	2814.88	2284.52	3568.55	4368.91	2562.68	2274.78	7404.74	4145.55	1743.04	2732.96	1877.3	2256.7	1803.06	1118.92
FABP3	196.466	-1.74223	0.525889	0.0222458	199.07	144.014	156.002	218.541	127.117	90.3501	782.191	259.779	260.74	118.098	148.039	109.907	98.7079	37.9662
PRKG1	254.137	-0.0731217	0.264065	0.917428	223.256	327.427	305.505	339.74	252.055	182.886	263.405	308.147	188.153	243.994	184.512	290.69	212.222	235.933
NOS3	2850.74	-1.4012	0.332776	0.00197253	3019.54	2491.03	3021.25	3283.84	1515.96	2013.2	9104.17	4403.77	2317.05	2114.62	2014.61	1674.29	1747.13	1189.97
PDE3B	1017.03	-0.570765	0.332643	0.338663	971.163	576.734	1069.92	936.194	818.635	704.585	1268.89	1242.73	1273.14	1329.16	1263.69	1065.18	1251.95	466.442
VASP	748.312	-0.378625	0.218841	0.33336	727.442	728.899	1071.22	796.862	674.084	752.674	1013.51	1043.8	464.175	756.494	550.318	677.934	567.57	651.392
LPL	7945.12	-0.175141	0.597858	0.912622	12945.1	4410.76	3783.06	12331.8	5821.24	2666.78	8096.01	7694.31	12168.8	9353.12	8354.54	4971.52	16327.9	2306.72
PRDM16	220.428	0.976744	0.418588	0.150078	202.791	326.748	215.803	297.75	106.778	187.986	94.9326	131.06	288.438	148.179	232.786	363.619	337.252	151.865
EHMT1	2041.58	-0.220918	0.270787	0.713393	2189.77	1656.16	2411.54	1852.35	1465.84	1801.17	2231.58	2185.89	2232.05	2165.87	2008.18	3106.17	1951.13	1324.48
GABPA	459.006	0.0126302	0.21942	0.981964	431.628	394.679	538.208	571.641	427.84	496.197	366.36	574.947	381.082	504.701	382.97	485.853	447.476	422.51
VEGFA	2543.55	-1.79209	0.421768	0.00173632	2524.65	1227.51	1940.93	1750.23	1937.99	1251.79	9413.04	2859.13	1785.07	1797.09	2733.35	3302.36	1923.16	1163.39
CYP1A1	588.25	12.8026	1.8602	6.66e-09	840.93	821.286	3270.85	2585.27	245.518	289.995	0	0	42.024	23.3967	26.8186	79.0923	1.64513	8.67799
THRA	902.488	0.140846	0.229751	0.79252	1080.93	908.917	1145.32	793.045	752.534	877.999	784.865	892.455	720.139	870.135	750.921	1205.9	992.014	859.664
THRB	46.1997	0.0616323	0.420966	0.956735	70.6977	34.6448	28.6004	43.899	29.7817	42.9892	38.7753	39.786	69.7217	28.9674	53.6372	55.4673	74.0309	35.7967
DIO2	382.528	-0.828696	1.15113	0.752422	474.419	192.245	214.503	998.225	223	119.495	780.854	534.381	368.666	1014.97	131.948	19.5163	251.705	31.4577
PNPLA2	10066.8	0.416699	0.435082	0.654887	12370.2	6842.01	9627.95	7445.65	5952.72	8203.64	7907.49	4688.51	14394.2	14965	14000.4	15845.2	15437.9	3253.71
LIPE	1691.37	0.651891	0.429946	0.415719	2552.56	1393.94	1489.82	1238.72	1392.48	1824.49	1288.94	809.763	2476.55	2140.24	1834.39	2732.28	1961	544.002
MGLL	5513.86	-0.284987	0.285857	0.638755	5840	4158.73	7666.22	4172.31	3879.62	6032.33	6900.67	5992.09	5158.45	5230.84	6559.83	6498.92	5577	3527.06
MKI67	302.392	2.38858	0.576899	0.00246278	481.861	794.792	271.704	608.86	361.013	153.741	128.36	42.9065	132.758	227.282	151.257	327.668	120.095	431.188

## Sheet: BAT AT-Control
Gene	baseMean	log2FoldChange	lfcSE	FDR	Cold 1	Cold 2	Cold 3	Cold 4	Cold 5	Cold 6	Control 1	Control 2	AT 1	AT 2	AT 3	AT 4	AT 5	AT 6
UCP1	8489.18	-2.22646	1.01581	0.12429	11789.7	8714.98	7853.97	10149.1	5132.45	2812.71	20367.2	18666.9	6668.33	12307.9	3150.08	757.355	3372.8	191.932
ADRB1	139.705	-0.358877	0.511499	0.696742	178.551	149.993	167.999	177.252	100.772	96.601	174.586	110.351	96.0284	207.496	123.719	81.0005	167.074	29.4047
ADRB2	139.498	0.933642	0.383298	0.0814721	129.052	97.0935	190.235	77.431	92.489	96.601	70.3194	96.2031	133.687	136.567	227.347	259.202	152.157	116.015
ADRB3	396.622	-0.874391	0.584599	0.330376	530.349	198.874	206.293	308.791	339.586	157.946	910.515	375.617	649.604	483.805	286.563	437.403	319.23	65.2249
ADRA1A	477.593	-0.000617215	0.621685	0.999412	542.724	359.581	481.763	499.103	311.978	371.597	569.829	341.663	411.416	1319.08	287.62	234.902	537.023	86.0755
PPARGC1A	622.58	-1.30077	0.525851	0.0761316	525.046	614.703	711.527	1216.51	593.586	415.314	1296.06	541.143	687.262	482.747	588.988	237.939	272.987	119.757
PPARGC1B	755.105	-0.222766	0.48244	0.809761	926.343	346.858	760.938	684.751	502.477	464.672	994.17	715.865	883.085	1110.53	1158.94	744.193	592.217	197.279
PPARA	359.278	0.175824	0.276456	0.726647	314.674	305.342	375.528	281.737	286.44	286.277	322.499	319.027	421.772	297.482	472.67	541.691	359.507	230.96
PPARG	3767.97	-0.0404155	0.346224	0.956602	3597.53	1984.06	4006.04	2990.89	2989.33	2682.97	3833.62	3979.7	5278.74	4580.8	3400.69	3814.11	5194.21	1890.99
ELOVL6	1099.55	-0.187523	0.558675	0.867174	822.041	647.514	717.703	823.754	669.51	548.581	1240.29	1503.17	1016.77	1881.23	904.101	590.291	2859.65	291.374
BMP4	427.755	1.08033	0.399998	0.0479637	390.69	428.551	548.469	572.803	345.108	283.457	248.543	162.696	341.748	176.795	500.164	680.405	486.304	594.509
BMP7	39.9493	0.106935	0.827478	0.951483	49.4992	85.7102	9.88232	16.7923	37.9619	14.1023	48.4961	24.7582	22.5949	11.6452	19.0337	69.863	16.409	112.272
BMP8B	19.3	-1.04002	0.67987	0.317463	10.607	26.7844	25.9411	27.9871	10.3532	18.333	29.0977	24.0508	27.3022	14.8212	5.28714	9.11256	23.8677	3.20778
CIDEA	1616.47	-0.0100818	0.655222	0.994345	2934.6	960.222	921.526	2090.64	993.221	1107.03	1932.57	1090.77	1081.73	1807.12	1352.45	1079.33	3832.26	240.049
CKB	1130.95	0.0497755	0.442017	0.958071	1066	1167.13	911.644	1047.65	966.993	1031.59	1031.75	1046.92	635.482	680.715	1830.41	2324.72	920.398	521.265
PDK4	3959.51	-0.285359	0.559397	0.786689	5116.1	8169.25	2449.58	4053.47	8175.61	3830.9	3672.37	2214.79	2620.07	1665.26	1227.67	6482.07	2401.69	1085.3
TGM2	2089.45	-0.0455068	0.299731	0.941499	1817.33	2543.18	1719.52	3155.08	2025.09	1699.33	1587.04	2087.47	2623.84	1916.17	1101.84	1996.66	1858.7	1884.04
FNDC5	131.615	1.95097	0.443048	0.000433028	132.587	113.164	56.8233	78.3639	130.451	135.382	49.7085	35.3688	265.49	74.1059	193.509	167.064	110.388	238.98
ACSL5	858.108	0.284769	0.357357	0.649611	1023.57	545.063	1015.41	993.542	792.368	698.066	644.998	669.178	716.447	593.906	867.091	1541.04	480.337	955.385
CPT1A	2925.47	-1.58733	0.33536	0.000141413	2674.73	2251.9	3390.87	4270.83	2435.08	2201.38	6714.29	3759	1718.16	2596.88	1850.5	2224.48	1634.94	1102.94
FABP3	196.466	-2.01414	0.526394	0.00281132	189.158	141.957	148.235	213.635	120.788	87.4345	709.256	235.556	257.017	112.217	145.925	108.338	89.5039	37.4241
PRKG1	254.137	-0.340286	0.264633	0.417236	212.14	322.752	290.293	332.114	239.505	176.984	238.843	279.414	185.467	231.846	181.878	286.539	192.433	232.564
NOS3	2850.74	-1.87369	0.332863	3.21e-06	2869.19	2455.46	2870.81	3210.12	1440.48	1948.24	8255.25	3993.14	2283.97	2009.33	1985.85	1650.39	1584.22	1172.98
PDE3B	1017.03	-0.1813	0.3325	0.769935	922.807	568.499	1016.64	915.178	777.874	681.848	1150.57	1126.85	1254.96	1262.98	1245.65	1049.97	1135.21	459.782
VASP	748.312	-0.750465	0.219171	0.00845251	691.222	718.492	1017.88	778.974	640.521	728.386	919.001	946.469	457.547	718.827	542.461	668.255	514.647	642.091
LPL	7945.12	0.174988	0.597849	0.885245	12300.6	4347.78	3594.69	12055	5531.39	2580.73	7341.1	6976.85	11995.1	8887.41	8235.25	4900.53	14805.4	2273.78
PRDM16	220.428	1.15965	0.418393	0.0411411	192.693	322.083	205.058	291.066	101.462	181.92	86.0806	118.839	284.32	140.801	229.462	358.427	305.805	149.697
EHMT1	2041.58	-0.0517173	0.270754	0.927344	2080.74	1632.51	2291.46	1810.77	1392.86	1743.05	2023.5	1982.07	2200.18	2058.03	1979.51	3061.82	1769.19	1305.57
GABPA	459.006	-0.111778	0.219613	0.787302	410.137	389.044	511.41	558.809	406.537	480.185	332.198	521.336	375.641	479.571	377.502	478.916	405.751	416.477
VEGFA	2543.55	-1.5349	0.421732	0.00472931	2398.95	1209.99	1844.29	1710.95	1841.5	1211.39	8535.32	2592.53	1759.58	1707.61	2694.33	3255.21	1743.83	1146.78
CYP1A1	588.25	7.33441	1.86338	0.00198837	799.059	809.559	3107.99	2527.24	233.293	280.637	0	0	41.424	22.2318	26.4357	77.963	1.49173	8.55409
THRA	902.488	0.100084	0.229792	0.820021	1027.11	895.939	1088.29	775.243	715.064	849.666	711.681	809.238	709.857	826.81	740.2	1188.68	899.514	847.39
THRB	46.1997	0.416758	0.419013	0.553137	67.1775	34.1501	27.1764	42.9136	28.2989	41.6019	35.1597	36.0762	68.7262	27.525	52.8714	54.6754	67.1279	35.2856
DIO2	382.528	-1.118	1.15124	0.564882	450.797	189.5	203.823	975.817	211.896	115.639	708.043	484.553	363.402	964.435	130.064	19.2376	228.235	31.0086
PNPLA2	10066.8	1.04368	0.435065	0.0866467	11754.3	6744.32	9148.56	7278.51	5656.32	7938.91	7170.15	4251.33	14188.7	14219.9	13800.5	15618.9	13998.4	3207.25
LIPE	1691.37	0.892892	0.429911	0.148265	2425.46	1374.04	1415.64	1210.91	1323.14	1765.61	1168.76	734.256	2441.19	2033.68	1808.2	2693.27	1778.14	536.235
MGLL	5513.86	-0.248845	0.285856	0.612167	5549.22	4099.36	7284.5	4078.65	3686.44	5837.66	6257.21	5433.35	5084.8	4970.39	6466.17	6406.13	5056.97	3476.7
MKI67	302.392	1.44892	0.577566	0.0709425	457.868	783.444	258.176	595.192	343.037	148.78	116.391	38.9057	130.862	215.966	149.097	322.99	108.896	425.031

## Sheet: BAT Cold-AT
Gene	baseMean	log2FoldChange	lfcSE	FDR	Cold 1	Cold 2	Cold 3	Cold 4	Cold 5	Cold 6	Control 1	Control 2	AT 1	AT 2	AT 3	AT 4	AT 5	AT 6
UCP1	8489.18	0.804694	0.718328	0.643669	12407.4	8841.22	8265.53	10382.1	5401.39	2906.5	22461.6	20586.5	6764.92	12952.9	3195.71	768.325	3719.64	194.713
ADRB1	139.705	0.297991	0.362212	0.741817	187.907	152.165	176.803	181.322	106.052	99.8223	192.539	121.698	97.4194	218.369	125.511	82.1738	184.255	29.8306
ADRB2	139.498	-0.581748	0.267574	0.299026	135.814	98.4999	200.203	79.2091	97.3355	99.8223	77.5506	106.096	135.623	143.723	230.64	262.956	167.803	117.695
ADRB3	396.622	-0.357736	0.414452	0.728027	558.14	201.755	217.103	315.882	357.381	163.213	1004.15	414.243	659.014	509.157	290.714	443.739	352.058	66.1697
ADRA1A	477.593	-0.177418	0.439692	0.884483	571.163	364.789	507.008	510.565	328.326	383.988	628.427	376.797	417.375	1388.21	291.787	238.304	592.247	87.3223
PPARGC1A	622.58	0.776312	0.372391	0.321551	552.558	623.606	748.811	1244.44	624.69	429.163	1429.34	596.79	697.217	508.043	597.519	241.386	301.059	121.492
PPARGC1B	755.105	-0.338778	0.341441	0.686692	974.884	351.882	800.812	700.475	528.808	480.167	1096.4	789.48	895.876	1168.72	1175.73	754.972	653.117	200.136
PPARA	359.278	-0.32119	0.195549	0.469012	331.163	309.765	395.206	288.207	301.449	295.824	355.663	351.833	427.881	313.07	479.517	549.537	396.477	234.306
PPARG	3767.97	-0.404708	0.244879	0.465095	3786.05	2012.79	4215.96	3059.57	3145.97	2772.44	4227.84	4388.94	5355.2	4820.84	3449.95	3869.36	5728.35	1918.38
ELOVL6	1099.55	-0.860447	0.395382	0.298285	865.116	656.893	755.311	842.67	704.593	566.874	1367.83	1657.75	1031.5	1979.81	917.197	598.842	3153.72	295.594
BMP4	427.755	-0.107888	0.280653	0.891338	411.163	434.758	577.209	585.956	363.192	292.909	274.101	179.427	346.698	186.06	507.408	690.26	536.313	603.121
BMP7	39.9493	-0.230572	0.585351	0.88771	52.093	86.9517	10.4002	17.1779	39.9511	14.5726	53.4832	27.3041	22.9222	12.2554	19.3094	70.8749	18.0964	113.899
BMP8B	19.3	0.549092	0.492003	0.645206	11.1628	27.1724	27.3004	28.6298	10.8958	18.9444	32.0899	26.524	27.6977	15.5978	5.36372	9.24455	26.3221	3.25425
CIDEA	1616.47	-0.0859807	0.463325	0.948993	3088.37	974.13	969.815	2138.64	1045.27	1143.95	2131.3	1202.94	1097.4	1901.82	1372.04	1094.97	4226.34	243.526
CKB	1130.95	-0.148893	0.312572	0.862967	1121.86	1184.04	959.415	1071.71	1017.66	1065.99	1137.85	1154.57	644.687	716.385	1856.92	2358.39	1015.05	528.815
PDK4	3959.51	1.04442	0.395509	0.172312	5384.19	8287.58	2577.94	4146.55	8604.02	3958.65	4050.01	2442.55	2658.02	1752.53	1245.46	6575.96	2648.66	1101.02
TGM2	2089.45	0.187646	0.211903	0.720327	1912.56	2580.02	1809.63	3227.53	2131.21	1756	1750.24	2302.13	2661.84	2016.57	1117.8	2025.58	2049.83	1911.33
FNDC5	131.615	-0.685592	0.301091	0.267345	139.535	114.803	59.8009	80.1634	137.287	139.897	54.8202	39.0059	269.336	77.9891	196.312	169.483	121.74	242.441
ACSL5	858.108	-0.00860134	0.252411	0.993364	1077.21	552.958	1068.62	1016.36	833.889	721.343	711.326	737.992	726.825	625.027	879.651	1563.36	529.732	969.224
CPT1A	2925.47	0.6324	0.237391	0.168348	2814.88	2284.52	3568.55	4368.91	2562.68	2274.78	7404.74	4145.55	1743.04	2732.96	1877.3	2256.7	1803.06	1118.92
FABP3	196.466	0.271906	0.375792	0.777919	199.07	144.014	156.002	218.541	127.117	90.3501	782.191	259.779	260.74	118.098	148.039	109.907	98.7079	37.9662
PRKG1	254.137	0.267165	0.187665	0.538087	223.256	327.427	305.505	339.74	252.055	182.886	263.405	308.147	188.153	243.994	184.512	290.69	212.222	235.933
NOS3	2850.74	0.472489	0.235708	0.347346	3019.54	2491.03	3021.25	3283.84	1515.96	2013.2	9104.17	4403.77	2317.05	2114.62	2014.61	1674.29	1747.13	1189.97
PDE3B	1017.03	-0.389465	0.23544	0.464481	971.163	576.734	1069.92	936.194	818.635	704.585	1268.89	1242.73	1273.14	1329.16	1263.69	1065.18	1251.95	466.442
VASP	748.312	0.371839	0.155681	0.233641	727.442	728.899	1071.22	796.862	674.084	752.674	1013.51	1043.8	464.175	756.494	550.318	677.934	567.57	651.392
LPL	7945.12	-0.350129	0.422746	0.739734	12945.1	4410.76	3783.06	12331.8	5821.24	2666.78	8096.01	7694.31	12168.8	9353.12	8354.54	4971.52	16327.9	2306.72
PRDM16	220.428	-0.182904	0.29159	0.813226	202.791	326.748	215.803	297.75	106.778	187.986	94.9326	131.06	288.438	148.179	232.786	363.619	337.252	151.865
EHMT1	2041.58	-0.1692	0.191523	0.720589	2189.77	1656.16	2411.54	1852.35	1465.84	1801.17	2231.58	2185.89	2232.05	2165.87	2008.18	3106.17	1951.13	1324.48
GABPA	459.006	0.124408	0.155313	0.7503	431.628	394.679	538.208	571.641	427.84	496.197	366.36	574.947	381.082	504.701	382.97	485.853	447.476	422.51
VEGFA	2543.55	-0.257191	0.298546	0.728122	2524.65	1227.51	1940.93	1750.23	1937.99	1251.79	9413.04	2859.13	1785.07	1797.09	2733.35	3302.36	1923.16	1163.39
CYP1A1	588.25	5.46817	0.8377	2.4111e-07	840.93	821.286	3270.85	2585.27	245.518	289.995	0	0	42.024	23.3967	26.8186	79.0923	1.64513	8.67799
THRA	902.488	0.0407621	0.162295	0.932444	1080.93	908.917	1145.32	793.045	752.534	877.999	784.865	892.455	720.139	870.135	750.921	1205.9	992.014	859.664
THRB	46.1997	-0.355126	0.293193	0.615062	70.6977	34.6448	28.6004	43.899	29.7817	42.9892	38.7753	39.786	69.7217	28.9674	53.6372	55.4673	74.0309	35.7967
DIO2	382.528	0.289304	0.814506	0.899215	474.419	192.245	214.503	998.225	223	119.495	780.854	534.381	368.666	1014.97	131.948	19.5163	251.705	31.4577
PNPLA2	10066.8	-0.626984	0.307588	0.336254	12370.2	6842.01	9627.95	7445.65	5952.72	8203.64	7907.49	4688.51	14394.2	14965	14000.4	15845.2	15437.9	3253.71
LIPE	1691.37	-0.241	0.303645	0.753111	2552.56	1393.94	1489.82	1238.72	1392.48	1824.49	1288.94	809.763	2476.55	2140.24	1834.39	2732.28	1961	544.002
MGLL	5513.86	-0.0361419	0.202172	0.951021	5840	4158.73	7666.22	4172.31	3879.62	6032.33	6900.67	5992.09	5158.45	5230.84	6559.83	6498.92	5577	3527.06
MKI67	302.392	0.939662	0.402415	0.251516	481.861	794.792	271.704	608.86	361.013	153.741	128.36	42.9065	132.758	227.282	151.257	327.668	120.095	431.188

## Sheet: Thyroid Cold-Control
Gene	baseMean	log2FoldChange	lfcSE	FDR	Cold 1	Cold 2	Cold 3	Cold 4	Cold 5	Cold 6	Control 1	Control 2	AT 1	AT 2	AT 3	AT 4	AT 5	AT 6
UCP1	62.3682	-2.90837	1.09347	NA	157.209	7.5342	3.01296	16.7026	5.08739	14.5984	171.563	339.967	56.123	19.2392	9.44243	15.235	45.9185	11.522
ADRB1	23.2052	0.107595	0.6316	0.921741	45.0431	31.0786	17.0735	26.5277	8.47898	17.3356	9.77259	35.7164	26.4108	17.214	17.5359	19.0437	29.712	23.9303
ADRB2	44.128	-1.20915	0.763341	0.243315	30.0287	20.7191	19.0821	30.4577	22.0454	18.248	93.3825	14.5511	31.3629	24.3021	178.057	70.4617	25.2102	39.8838
ADRB3	NA
ADRA1A	22.54	-0.81946	0.436788	0.156296	25.6127	23.5444	19.0821	12.7726	17.8059	15.5108	38.0045	29.1023	23.9348	31.3903	16.187	16.1871	21.6087	24.8166
PPARGC1A	916.776	-1.22929	0.266258	0.000137592	651.8	1067.03	556.394	670.07	757.173	873.167	1319.3	2258.07	678.428	904.242	740.557	949.329	686.077	723.225
PPARGC1B	87.5404	-0.693777	0.903464	NA	42.3935	42.3799	43.1858	31.4403	29.6764	34.6712	53.2063	67.4643	49.5203	56.705	650.179	39.0396	39.616	46.0879
PPARA	704.81	0.0980937	0.261087	0.82242	642.968	743.061	893.845	737.863	566.396	683.388	482.114	847.934	588.466	784.757	984.711	699.856	593.339	618.641
PPARG	341.744	-0.346681	0.366267	0.522509	448.664	352.224	307.322	274.12	269.632	173.356	332.268	441.825	436.604	268.336	249.55	281.847	361.046	587.621
ELOVL6	592.563	-0.108252	0.287286	0.822185	577.611	818.403	669.882	423.461	566.396	598.534	520.119	793.698	439.08	640.969	457.284	407.535	698.682	684.228
BMP4	150.083	0.430459	0.521939	0.585994	130.713	119.605	119.514	120.848	110.227	102.189	127.044	46.299	127.927	126.574	481.564	237.094	104.442	147.127
BMP7	1002.24	-0.310785	0.338909	0.537905	1228.53	882.443	1303.61	1206.52	833.484	786.489	724.257	1857.25	878.16	744.253	550.359	955.994	1126.35	953.665
BMP8B	30.8389	0.621465	0.576317	0.457566	14.1312	24.4862	25.108	49.1254	18.6538	26.4596	11.9443	22.4881	37.9656	28.3525	25.6295	70.4617	45.9185	31.0207
CIDEA	63.6447	0.416931	0.629991	0.671586	111.283	54.623	23.0994	60.9155	38.1554	41.9704	33.6611	48.9447	56.9483	39.491	62.0503	57.1311	196.279	66.4729
CKB	3234.36	-0.787762	0.431696	0.169627	3766.84	3388.51	2683.54	2863.03	2307.98	3504.53	2005.55	8649.99	1910.66	2642.86	1807.55	4757.12	2630.86	2362
PDK4	2357.24	-2.39843	0.841652	0.0237293	1361.89	1698.02	741.189	707.406	1365.96	1913.3	12047.4	1638.99	1940.37	583.252	5475.26	1600.62	623.051	1304.64
TGM2	1448.27	-1.36189	0.408784	0.00746999	2029.59	1188.52	1019.39	1226.17	761.413	780.102	2349.76	3652.33	1281.75	917.406	2210.88	1154.05	740.999	963.414
FNDC5	430.847	0.332732	0.472122	0.648455	502.539	148.8	483.078	302.612	468.888	232.662	390.903	174.614	335.087	448.577	834.981	361.83	744.6	602.688
ACSL5	490.924	-0.884899	0.28511	0.0131677	627.07	439.809	403.737	377.283	353.574	373.172	712.313	873.068	528.216	416.174	619.154	336.121	316.027	497.217
CPT1A	3486.98	-0.935732	0.262641	0.00399715	2449.11	3348.95	3185.71	2416.97	3286.45	3797.41	4456.3	7331.12	3292.27	2693.49	2805.75	4330.54	2295.03	3128.66
FABP3	6565.47	-2.19531	0.343005	5.36e-08	3733.28	4949.03	5113	5243.64	3879.98	3619.49	9324.13	31191	4537.71	2951.7	5356.56	4265.79	3725.7	4025.6
PRKG1	360.455	-1.96948	0.71043	NA	210.201	213.783	276.188	153.271	137.36	208.027	1323.64	240.755	264.108	149.863	1257.19	218.05	139.556	254.37
NOS3	401.361	-1.52995	0.278905	3.95e-06	347.98	362.583	302.301	338.965	221.301	291.056	598.299	1197.16	451.46	331.117	294.064	305.651	291.718	285.39
PDE3B	157.277	0.153738	0.433036	0.832415	143.961	121.489	101.436	276.085	85.6377	101.276	167.22	80.6926	170.02	167.077	148.381	265.66	157.564	215.372
VASP	1100.22	-0.93932	0.19939	9.73e-05	1020.98	931.416	1058.55	1010.02	738.52	1050.17	1415.94	2299.08	1090.27	1100.68	914.567	929.333	912.068	931.507
LPL	1766.47	0.11642	0.477074	0.884164	3671.45	1445.63	1148.94	1210.45	1575.4	1494.51	2058.76	1183.93	2518.93	1022.72	1191.1	1208.32	1809.73	3190.7
PRDM16	28.6574	-0.123393	0.451201	0.869973	20.3135	26.3697	19.0821	24.5627	13.5664	22.81	18.4593	27.7794	44.5683	26.3273	53.9568	25.709	37.8153	39.8838
EHMT1	2760.01	-0.367795	0.158996	0.0732454	2406.71	2731.15	2774.94	2993.7	2296.96	2561.11	2891.6	3890.44	2728.57	2913.22	2595.32	2764.19	2865.86	2226.4
GABPA	1100.26	-0.242732	0.211723	0.425936	1063.37	1101.88	1299.59	942.225	943.711	1480.83	1154.25	1541.1	909.523	1073.34	1065.65	1004.56	770.711	1052.93
VEGFA	15306.7	-1.32174	0.316884	0.000658172	10529.5	14717.1	11198.2	12624.2	9518.51	13993.5	16234.4	44243.4	12986.7	15847	11201.4	12638.4	18157.6	10403.5
CYP1A1	1014.88	8.98142	1.13697	3.63e-12	2312.21	711.04	3174.66	4223.8	1210.8	484.484	6.51506	1.32283	515.836	356.432	215.827	676.051	19.808	299.571
THRA	1915.6	0.301835	0.187628	0.235056	1832.64	1746.05	2019.69	1719.39	2064.63	2428.81	1572.3	1621.79	1842.98	1671.79	2561.6	1880.57	1749.41	2106.75
THRB	NA
DIO2	61.6069	-1.23308	0.632652	0.139081	79.4878	32.0204	47.2031	75.6531	22.0454	37.4084	96.64	133.606	110.595	26.3273	82.2841	66.653	18.0073	34.5659
PNPLA2	5091.2	-0.0712601	0.264755	0.872079	4871.72	6690.37	4347.7	6568.06	4113.16	3646.86	5308.69	5280.74	4597.96	4855.37	3924.01	5693.11	6971.51	4407.6
LIPE	150.27	-0.371789	0.377645	0.504016	198.719	171.403	115.497	108.076	108.531	92.1524	136.816	206.361	154.338	117.46	145.683	153.302	123.35	272.096
MGLL	1854.13	-0.632673	0.294296	0.0990659	1391.04	1361.81	2531.89	1456.08	1422.77	1352.18	1738.43	3180.08	1691.94	1555.34	2645.23	1841.53	1852.05	1937.46
MKI67	234.059	3.00552	0.699247	0.000443074	353.279	347.515	277.193	269.207	84.7898	94.8896	18.4593	41.0077	80.8831	520.471	546.312	199.007	325.931	117.879
* NA; Not enough counts availble to perform an analysis.

## Sheet: Thyroid AT-Control
Gene	baseMean	log2FoldChange	lfcSE	FDR	Cold 1	Cold 2	Cold 3	Cold 4	Cold 5	Cold 6	Control 1	Control 2	AT 1	AT 2	AT 3	AT 4	AT 5	AT 6
UCP1	62.3682	-3.28009	1.09509	NA	157.209	7.5342	3.01296	16.7026	5.08739	14.5984	171.563	339.967	56.123	19.2392	9.44243	15.235	45.9185	11.522
ADRB1	23.2052	-0.00767109	0.633145	0.993551	45.0431	31.0786	17.0735	26.5277	8.47898	17.3356	9.77259	35.7164	26.4108	17.214	17.5359	19.0437	29.712	23.9303
ADRB2	44.128	0.176165	0.757981	0.883243	30.0287	20.7191	19.0821	30.4577	22.0454	18.248	93.3825	14.5511	31.3629	24.3021	178.057	70.4617	25.2102	39.8838
ADRB3	NA
ADRA1A	22.54	-0.584176	0.434787	0.313991	25.6127	23.5444	19.0821	12.7726	17.8059	15.5108	38.0045	29.1023	23.9348	31.3903	16.187	16.1871	21.6087	24.8166
PPARGC1A	916.776	-1.19639	0.266289	0.000180275	651.8	1067.03	556.394	670.07	757.173	873.167	1319.3	2258.07	678.428	904.242	740.557	949.329	686.077	723.225
PPARGC1B	87.5404	1.27967	0.899971	NA	42.3935	42.3799	43.1858	31.4403	29.6764	34.6712	53.2063	67.4643	49.5203	56.705	650.179	39.0396	39.616	46.0879
PPARA	704.81	0.0977947	0.261142	0.806234	642.968	743.061	893.845	737.863	566.396	683.388	482.114	847.934	588.466	784.757	984.711	699.856	593.339	618.641
PPARG	341.744	-0.0858538	0.366103	0.882198	448.664	352.224	307.322	274.12	269.632	173.356	332.268	441.825	436.604	268.336	249.55	281.847	361.046	587.621
ELOVL6	592.563	-0.242805	0.287439	0.54811	577.611	818.403	669.882	423.461	566.396	598.534	520.119	793.698	439.08	640.969	457.284	407.535	698.682	684.228
BMP4	150.083	1.2274	0.520915	0.0605548	130.713	119.605	119.514	120.848	110.227	102.189	127.044	46.299	127.927	126.574	481.564	237.094	104.442	147.127
BMP7	1002.24	-0.570938	0.339034	0.195291	1228.53	882.443	1303.61	1206.52	833.484	786.489	724.257	1857.25	878.16	744.253	550.359	955.994	1126.35	953.665
BMP8B	30.8389	1.22888	0.573073	0.0906005	14.1312	24.4862	25.108	49.1254	18.6538	26.4596	11.9443	22.4881	37.9656	28.3525	25.6295	70.4617	45.9185	31.0207
CIDEA	63.6447	0.953126	0.628747	0.24983	111.283	54.623	23.0994	60.9155	38.1554	41.9704	33.6611	48.9447	56.9483	39.491	62.0503	57.1311	196.279	66.4729
CKB	3234.36	-0.988308	0.431722	0.0690731	3766.84	3388.51	2683.54	2863.03	2307.98	3504.53	2005.55	8649.99	1910.66	2642.86	1807.55	4757.12	2630.86	2362
PDK4	2357.24	-1.83288	0.84161	0.0851111	1361.89	1698.02	741.189	707.406	1365.96	1913.3	12047.4	1638.99	1940.37	583.252	5475.26	1600.62	623.051	1304.64
TGM2	1448.27	-1.30922	0.408793	0.00908653	2029.59	1188.52	1019.39	1226.17	761.413	780.102	2349.76	3652.33	1281.75	917.406	2210.88	1154.05	740.999	963.414
FNDC5	430.847	0.969928	0.471819	0.106415	502.539	148.8	483.078	302.612	468.888	232.662	390.903	174.614	335.087	448.577	834.981	361.83	744.6	602.688
ACSL5	490.924	-0.810724	0.285122	0.0220394	627.07	439.809	403.737	377.283	353.574	373.172	712.313	873.068	528.216	416.174	619.154	336.121	316.027	497.217
CPT1A	3486.98	-0.930918	0.262653	0.00361641	2449.11	3348.95	3185.71	2416.97	3286.45	3797.41	4456.3	7331.12	3292.27	2693.49	2805.75	4330.54	2295.03	3128.66
FABP3	6565.47	-2.28943	0.34302	9.51e-09	3733.28	4949.03	5113	5243.64	3879.98	3619.49	9324.13	31191	4537.71	2951.7	5356.56	4265.79	3725.7	4025.6
PRKG1	360.455	-1.04165	0.709929	NA	210.201	213.783	276.188	153.271	137.36	208.027	1323.64	240.755	264.108	149.863	1257.19	218.05	139.556	254.37
NOS3	401.361	-1.45682	0.278922	1.03e-05	347.98	362.583	302.301	338.965	221.301	291.056	598.299	1197.16	451.46	331.117	294.064	305.651	291.718	285.39
PDE3B	157.277	0.593102	0.432453	0.303199	143.961	121.489	101.436	276.085	85.6377	101.276	167.22	80.6926	170.02	167.077	148.381	265.66	157.564	215.372
VASP	1100.22	-0.921911	0.199431	0.000109794	1020.98	931.416	1058.55	1010.02	738.52	1050.17	1415.94	2299.08	1090.27	1100.68	914.567	929.333	912.068	931.507
LPL	1766.47	0.169623	0.477078	0.817093	3671.45	1445.63	1148.94	1210.45	1575.4	1494.51	2058.76	1183.93	2518.93	1022.72	1191.1	1208.32	1809.73	3190.7
PRDM16	28.6574	0.722913	0.444183	0.211538	20.3135	26.3697	19.0821	24.5627	13.5664	22.81	18.4593	27.7794	44.5683	26.3273	53.9568	25.709	37.8153	39.8838
EHMT1	2760.01	-0.337853	0.159012	0.0938923	2406.71	2731.15	2774.94	2993.7	2296.96	2561.11	2891.6	3890.44	2728.57	2913.22	2595.32	2764.19	2865.86	2226.4
GABPA	1100.26	-0.460282	0.21188	0.0860421	1063.37	1101.88	1299.59	942.225	943.711	1480.83	1154.25	1541.1	909.523	1073.34	1065.65	1004.56	770.711	1052.93
VEGFA	15306.7	-1.15922	0.316882	0.00259855	10529.5	14717.1	11198.2	12624.2	9518.51	13993.5	16234.4	44243.4	12986.7	15847	11201.4	12638.4	18157.6	10403.5
CYP1A1	1014.88	6.44166	1.13734	1.58e-06	2312.21	711.04	3174.66	4223.8	1210.8	484.484	6.51506	1.32283	515.836	356.432	215.827	676.051	19.808	299.571
THRA	1915.6	0.301435	0.187655	0.218602	1832.64	1746.05	2019.69	1719.39	2064.63	2428.81	1572.3	1621.79	1842.98	1671.79	2561.6	1880.57	1749.41	2106.75
THRB	NA
DIO2	61.6069	-1.02966	0.632247	0.211253	79.4878	32.0204	47.2031	75.6531	22.0454	37.4084	96.64	133.606	110.595	26.3273	82.2841	66.653	18.0073	34.5659
PNPLA2	5091.2	-0.0610806	0.264762	0.88391	4871.72	6690.37	4347.7	6568.06	4113.16	3646.86	5308.69	5280.74	4597.96	4855.37	3924.01	5693.11	6971.51	4407.6
LIPE	150.27	-0.0883878	0.377234	0.882304	198.719	171.403	115.497	108.076	108.531	92.1524	136.816	206.361	154.338	117.46	145.683	153.302	123.35	272.096
MGLL	1854.13	-0.356655	0.294254	0.369125	1391.04	1361.81	2531.89	1456.08	1422.77	1352.18	1738.43	3180.08	1691.94	1555.34	2645.23	1841.53	1852.05	1937.46
MKI67	234.059	3.33197	0.699099	6.45e-05	353.279	347.515	277.193	269.207	84.7898	94.8896	18.4593	41.0077	80.8831	520.471	546.312	199.007	325.931	117.879
* NA; Not enough counts availble to perform an analysis.

## Sheet: Thyroid Cold-AT
Gene	baseMean	log2FoldChange	lfcSE	FDR	Cold 1	Cold 2	Cold 3	Cold 4	Cold 5	Cold 6	Control 1	Control 2	AT 1	AT 2	AT 3	AT 4	AT 5	AT 6
UCP1	62.3682	0.371724	0.783019	NA	157.209	7.5342	3.01296	16.7026	5.08739	14.5984	171.563	339.967	56.123	19.2392	9.44243	15.235	45.9185	11.522
ADRB1	23.2052	0.115266	0.439931	0.999567	45.0431	31.0786	17.0735	26.5277	8.47898	17.3356	9.77259	35.7164	26.4108	17.214	17.5359	19.0437	29.712	23.9303
ADRB2	44.128	-1.38531	0.540598	0.83701	30.0287	20.7191	19.0821	30.4577	22.0454	18.248	93.3825	14.5511	31.3629	24.3021	178.057	70.4617	25.2102	39.8838
ADRB3	NA
ADRA1A	22.54	-0.235284	0.316833	0.995634	25.6127	23.5444	19.0821	12.7726	17.8059	15.5108	38.0045	29.1023	23.9348	31.3903	16.187	16.1871	21.6087	24.8166
PPARGC1A	916.776	-0.0329023	0.189067	0.999567	651.8	1067.03	556.394	670.07	757.173	873.167	1319.3	2258.07	678.428	904.242	740.557	949.329	686.077	723.225
PPARGC1B	87.5404	-1.97344	0.635921	NA	42.3935	42.3799	43.1858	31.4403	29.6764	34.6712	53.2063	67.4643	49.5203	56.705	650.179	39.0396	39.616	46.0879
PPARA	704.81	0.000299009	0.183979	0.999619	642.968	743.061	893.845	737.863	566.396	683.388	482.114	847.934	588.466	784.757	984.711	699.856	593.339	618.641
PPARG	341.744	-0.260828	0.258698	0.995634	448.664	352.224	307.322	274.12	269.632	173.356	332.268	441.825	436.604	268.336	249.55	281.847	361.046	587.621
ELOVL6	592.563	0.134554	0.202962	0.995634	577.611	818.403	669.882	423.461	566.396	598.534	520.119	793.698	439.08	640.969	457.284	407.535	698.682	684.228
BMP4	150.083	-0.796943	0.363406	0.963325	130.713	119.605	119.514	120.848	110.227	102.189	127.044	46.299	127.927	126.574	481.564	237.094	104.442	147.127
BMP7	1002.24	0.260153	0.239777	0.995634	1228.53	882.443	1303.61	1206.52	833.484	786.489	724.257	1857.25	878.16	744.253	550.359	955.994	1126.35	953.665
BMP8B	30.8389	-0.607419	0.379633	0.995634	14.1312	24.4862	25.108	49.1254	18.6538	26.4596	11.9443	22.4881	37.9656	28.3525	25.6295	70.4617	45.9185	31.0207
CIDEA	63.6447	-0.536195	0.43643	0.995634	111.283	54.623	23.0994	60.9155	38.1554	41.9704	33.6611	48.9447	56.9483	39.491	62.0503	57.1311	196.279	66.4729
CKB	3234.36	0.200545	0.305357	0.995634	3766.84	3388.51	2683.54	2863.03	2307.98	3504.53	2005.55	8649.99	1910.66	2642.86	1807.55	4757.12	2630.86	2362
PDK4	2357.24	-0.565552	0.595315	0.995634	1361.89	1698.02	741.189	707.406	1365.96	1913.3	12047.4	1638.99	1940.37	583.252	5475.26	1600.62	623.051	1304.64
TGM2	1448.27	-0.0526674	0.289421	0.999567	2029.59	1188.52	1019.39	1226.17	761.413	780.102	2349.76	3652.33	1281.75	917.406	2210.88	1154.05	740.999	963.414
FNDC5	430.847	-0.637195	0.332123	0.995634	502.539	148.8	483.078	302.612	468.888	232.662	390.903	174.614	335.087	448.577	834.981	361.83	744.6	602.688
ACSL5	490.924	-0.0741746	0.20245	0.999567	627.07	439.809	403.737	377.283	353.574	373.172	712.313	873.068	528.216	416.174	619.154	336.121	316.027	497.217
CPT1A	3486.98	-0.00481436	0.185868	0.999567	2449.11	3348.95	3185.71	2416.97	3286.45	3797.41	4456.3	7331.12	3292.27	2693.49	2805.75	4330.54	2295.03	3128.66
FABP3	6565.47	0.094115	0.242723	0.999567	3733.28	4949.03	5113	5243.64	3879.98	3619.49	9324.13	31191	4537.71	2951.7	5356.56	4265.79	3725.7	4025.6
PRKG1	360.455	-0.927837	0.503252	NA	210.201	213.783	276.188	153.271	137.36	208.027	1323.64	240.755	264.108	149.863	1257.19	218.05	139.556	254.37
NOS3	401.361	-0.0731274	0.199401	0.999567	347.98	362.583	302.301	338.965	221.301	291.056	598.299	1197.16	451.46	331.117	294.064	305.651	291.718	285.39
PDE3B	157.277	-0.439364	0.302838	0.995634	143.961	121.489	101.436	276.085	85.6377	101.276	167.22	80.6926	170.02	167.077	148.381	265.66	157.564	215.372
VASP	1100.22	-0.0174088	0.14162	0.999567	1020.98	931.416	1058.55	1010.02	738.52	1050.17	1415.94	2299.08	1090.27	1100.68	914.567	929.333	912.068	931.507
LPL	1766.47	-0.0532028	0.337183	0.999567	3671.45	1445.63	1148.94	1210.45	1575.4	1494.51	2058.76	1183.93	2518.93	1022.72	1191.1	1208.32	1809.73	3190.7
PRDM16	28.6574	-0.846306	0.302007	0.657391	20.3135	26.3697	19.0821	24.5627	13.5664	22.81	18.4593	27.7794	44.5683	26.3273	53.9568	25.709	37.8153	39.8838
EHMT1	2760.01	-0.0299423	0.112446	0.999567	2406.71	2731.15	2774.94	2993.7	2296.96	2561.11	2891.6	3890.44	2728.57	2913.22	2595.32	2764.19	2865.86	2226.4
GABPA	1100.26	0.21755	0.149797	0.995634	1063.37	1101.88	1299.59	942.225	943.711	1480.83	1154.25	1541.1	909.523	1073.34	1065.65	1004.56	770.711	1052.93
VEGFA	15306.7	-0.162521	0.224111	0.995634	10529.5	14717.1	11198.2	12624.2	9518.51	13993.5	16234.4	44243.4	12986.7	15847	11201.4	12638.4	18157.6	10403.5
CYP1A1	1014.88	2.53976	0.700736	0.220923	2312.21	711.04	3174.66	4223.8	1210.8	484.484	6.51506	1.32283	515.836	356.432	215.827	676.051	19.808	299.571
THRA	1915.6	0.000400328	0.132157	0.999619	1832.64	1746.05	2019.69	1719.39	2064.63	2428.81	1572.3	1621.79	1842.98	1671.79	2561.6	1880.57	1749.41	2106.75
THRB	NA
DIO2	61.6069	-0.203423	0.451706	0.999567	79.4878	32.0204	47.2031	75.6531	22.0454	37.4084	96.64	133.606	110.595	26.3273	82.2841	66.653	18.0073	34.5659
PNPLA2	5091.2	-0.0101794	0.18716	0.999567	4871.72	6690.37	4347.7	6568.06	4113.16	3646.86	5308.69	5280.74	4597.96	4855.37	3924.01	5693.11	6971.51	4407.6
LIPE	150.27	-0.283401	0.266442	0.995634	198.719	171.403	115.497	108.076	108.531	92.1524	136.816	206.361	154.338	117.46	145.683	153.302	123.35	272.096
MGLL	1854.13	-0.276018	0.208159	0.995634	1391.04	1361.81	2531.89	1456.08	1422.77	1352.18	1738.43	3180.08	1691.94	1555.34	2645.23	1841.53	1852.05	1937.46
MKI67	234.059	-0.326448	0.474508	0.995634	353.279	347.515	277.193	269.207	84.7898	94.8896	18.4593	41.0077	80.8831	520.471	546.312	199.007	325.931	117.879
* NA; Not enough counts availble to perform an analysis.
